# Supplementary material for: Gliosarcoma: The Distinct Genomic Alterations Identified by Comprehensive Analysis of Copy Number Variations
Source: Hindawi journal article supplement (doi:10.1155/2022/2376288), 2022-06-15
Supplement: f1 [file 2376288.f1.pdf]

# Supplementary Table S1

|              |                                      | GBM                                          |                                   |                                              |                                           |                                      |                                    |                                                           |                                    |                                  |                                            |                                            |                                            |                                    |                                            |                                   |                                               |                                          |                                |                                         |                                    |
|--------------|--------------------------------------|----------------------------------------------|-----------------------------------|----------------------------------------------|-------------------------------------------|--------------------------------------|------------------------------------|-----------------------------------------------------------|------------------------------------|----------------------------------|--------------------------------------------|--------------------------------------------|--------------------------------------------|------------------------------------|--------------------------------------------|-----------------------------------|-----------------------------------------------|------------------------------------------|--------------------------------|-----------------------------------------|------------------------------------|
| Paitents NO. | 1201                                 | 1202                                         | 1204                              | 1205                                         | 1206                                      | 1208                                 | 1211                               | 1212                                                      | 1213                               | 1217                             | 1220                                       | 1224                                       | 1225                                       | 1226                               | 1227                                       | 1230                              | 1233                                          | 1234                                     | 1235                           | 1236                                    | 1237                               |
| WHO Grade    | IV                                   | IV                                           | IV                                | IV                                           | IV                                        | IV                                   | IV                                 | IV                                                        | IV                                 | IV                               | IV                                         | IV                                         | IV                                         | IV                                 | IV                                         | NA                                | IV                                            | IV                                       | NA                             | IV                                      | IV                                 |
|              | GFAP+<br>Olig-2+<br>ATRX+<br>portion | GFAP+<br>P53+<br>Olig-2+<br>ATRX+            | GFAP+<br>P53+<br>Olig-2+<br>ATRX+ | GFAP+<br>P53+<br>Olig-2+<br>ATRX+<br>portion | GFAP+<br>P53+<br>Olig-2+<br>ATRX+<br>weak | GFAP+<br>P53+<br>Olig-2+<br>IDH-1-   | GFAP+<br>P53+<br>Olig-2+<br>ATRX+  | GFAP+<br>P53+<br>Olig-2+<br>IDH-1-                        | GFAP+<br>P53+<br>Olig-2+<br>IDH-1- | GFAP+<br>P53+<br>Olig-2+<br>IDH+ | GFAP+<br>P53+<br>Olig-2+<br>IDH-           | GFAP+<br>P53+<br>Olig-2+<br>IDH-1-         | GFAP+<br>P53+<br>Olig-2+<br>IDH-1-         | GFAP+<br>P53+<br>Olig-2+<br>IDH-1+ | GFAP+<br>P53+<br>Olig-2+<br>IDH-1-         | GFAP+<br>P53+<br>Olig-2+<br>ATRX+ | GFAP+<br>P53+<br>Olig-2+<br>ATRX+             | GFAP+<br>P53+<br>Olig-2+<br>IDH-         | GFAP+<br>P53+<br>Olig-2+<br>NA | GFAP+<br>P53+<br>Olig-2+<br>ATRX+       | GFAP+<br>P53+<br>Olig-2+<br>ATRX+  |
|              | p53+<br>1%                           | Olig-2+<br>portion                           | ATRX+                             | p53+<br>70%                                  | p53+<br>70%                               | ATRX+                                | p53+                               | CD34+<br>blood<br>vessels                                 | IDH-1-                             | ATRX-                            | ATRX+                                      | P53+<br>portion                            | IDH-1-                                     | IDH-1+                             | IDH-1-                                     | CD34+<br>blood<br>vessels         | IDH-1-                                        | ATRX+                                    | NA                             | Vim+                                    | IDH-1+<br>weak                     |
|              | NeuN-/+<br>IDH-1-                    | NeuN+<br>neuron<br>CD34+<br>blood<br>vessels | Vim+<br>NeuN-                     | NeuN-<br>IDH-1-                              | CD34+<br>blood<br>vessels<br>IDH-1-       | CD34+/-<br>NeuN-                     | CD34+<br>blood<br>vessels<br>NeuN- | P53+<br>portion<br>Vimentin<br>+                          | CK-<br>CD34-                       | p53+<br>Vim+                     | p53-<br>Vim+                               | ATRX-<br>Ki-67+<br>40%                     | H3K27Me<br>3-<br>H3K27M-                   | CD34+<br>P53+<br>NeuN-             | P53-<br>NeuN-                              | p53-<br>60%<br>G34V-              | CD34+<br>blood<br>vessels<br>p53+<br>30%      | Vim+<br>CD34+<br>blood<br>vessels        | NA                             | p53-<br>CD34+<br>blood<br>vessels       | P53+<br>8%<br>Vimentin+            |
|              | EMA-<br>Ki-67+<br>40%                | IDH-<br>Ki-67+<br>15%                        | CD34+<br>p53+<br>Ki-67+<br>10%    | Ki-67+<br>50%                                | NeuN-<br>Ki-67+<br>15%                    | EMA+<br>P53+<br>30%<br>Ki-67+<br>40% | IDH-1-<br>ATRX+<br>weak<br>ATRX+   | S-100+<br>H3K27Me<br>3-<br>H3K27Me<br>3-<br>Ki-67+<br>30% | EMA-<br>CD34+<br>blood<br>vessels  | NeuN-<br>ATRX-<br>Ki-67+<br>25%  | CD34+<br>blood<br>vessels<br>Ki-67+<br>30% | CD34+<br>blood<br>vessels<br>Ki-67+<br>25% | CD34+<br>blood<br>vessels<br>Ki-67+<br>50% | ATRX-<br>Ki-67<br>IDH-1-           | CD34+<br>blood<br>vessels<br>Ki-67+<br>30% | G34R-<br>Ki-67+<br>25%<br>IDH-1-  | Ki-67+<br>25%<br>p53+<br>15%<br>Ki-67+<br>20% | p53+<br>15%<br>CD34+<br>blood<br>vessels | EMA-<br>Ki-67+<br>20%          | S-100+<br>IDH-<br>EMA-<br>Ki-67+<br>40% | S100+<br>CD34+<br>blood<br>vessels |

|              |                  | Sarcoma                                                                                      |      |                                                          |                                                 |                                           |                                                                    |                                                                                                                      |                                                                               |                                                                                                       |                                                                                                                                                                    |                                                                                      |                                                                                                                                                                                                       |                                                                                                                                                                                                       |                                                                                                                                                                                                       |                                                                                                                                                                                                       |                                                                        |
|--------------|------------------|----------------------------------------------------------------------------------------------|------|----------------------------------------------------------|-------------------------------------------------|-------------------------------------------|--------------------------------------------------------------------|----------------------------------------------------------------------------------------------------------------------|-------------------------------------------------------------------------------|-------------------------------------------------------------------------------------------------------|--------------------------------------------------------------------------------------------------------------------------------------------------------------------|--------------------------------------------------------------------------------------|-------------------------------------------------------------------------------------------------------------------------------------------------------------------------------------------------------|-------------------------------------------------------------------------------------------------------------------------------------------------------------------------------------------------------|-------------------------------------------------------------------------------------------------------------------------------------------------------------------------------------------------------|-------------------------------------------------------------------------------------------------------------------------------------------------------------------------------------------------------|------------------------------------------------------------------------|
| Paitents NO. | 1203             | 1215                                                                                         | 1216 | 1218                                                     | 1222                                            | 1228                                      | 1229                                                               | 1231                                                                                                                 | 1238                                                                          | 1239                                                                                                  | 1240                                                                                                                                                               | 1246                                                                                 |                                                                                                                                                                                                       | 1248                                                                                                                                                                                                  | 1249                                                                                                                                                                                                  |                                                                                                                                                                                                       | 1250                                                                   |
| WHO Grade    | IV               | IV                                                                                           | IV   | NA                                                       | IV                                              | IV                                        | IV                                                                 | IV                                                                                                                   | IV                                                                            | IV                                                                                                    | IV                                                                                                                                                                 | Glioblastoma<br>components                                                           | Sarcoma<br>components                                                                                                                                                                                 | NA                                                                                                                                                                                                    | Glioblastoma<br>components                                                                                                                                                                            | Sarcoma<br>components                                                                                                                                                                                 | NA                                                                     |
|              | IDH<br>wild type | GFAP+<br>Vim+<br>CD34+<br>blood<br>vessels<br>EMA-<br>Olig2-<br>P53+<br>80%<br>Ki67+<br>>50% | NA   | GFAP+<br>focal<br>Vim+<br>SMA+<br>S100+<br>focal<br>CD34 | GFAP+<br>focal<br>EMA+<br>SSTR+<br>SMA+<br>CD34 | GFAP+/-<br>CD34+<br>Vim+<br>P53+<br>ATRX- | GFAP+<br>gliocyte<br>olig-2+<br>portion<br>IDH-1-<br>P53+<br>ATRX- | GFAP+<br>olig-2+<br>portion<br>IDH-1-<br>P53+<br>SMA+<br>portion<br>Des-<br>S100+<br>CK+<br>portion<br>ki-67+<br>40% | GFAP+<br>portion<br>Vim+<br>SMA+<br>blood<br>vessels<br>CD68+<br>ki67+<br>60% | GFAP+<br>portion<br>CD56+<br>CK+<br>Vim+<br>S100+<br>CD34+<br>EMA-<br>NeuN-<br>P53+<br>Ki-67+<br>>30% | GFAP-<br>Olig-2<br>IDH-1-<br>Vim+<br>CD34+<br>blood<br>vessels<br>P53-<br>Braf-<br>NeuN-<br>CK-<br>EMA-<br>SSTR2α-<br>S-100-<br>SOX-10-<br>TLE-1-<br>Ki-67+<br>30% | GFAP+<br>Vim+<br>S100+<br>P53+<br>70%<br>EMA+<br>Ki-67+<br>15%<br>Ag staining<br>(+) | Vim+<br>SMA-/+<br>GFAP+<br>S-100+<br>olig2+<br>portion<br>SOX-10+<br>NeuN-<br>Olig-2+<br>EMA+<br>Ki-67+<br>50%<br>CK-<br>P53+<br>portion<br>CD34-<br>MyoD1-<br>Ki-67+<br>15-40%<br>Ag staining<br>(-) | Vim+<br>SMA-/+<br>GFAP+<br>S-100+<br>olig2+<br>portion<br>SOX-10+<br>NeuN-<br>Olig-2+<br>EMA+<br>Ki-67+<br>50%<br>CK-<br>P53+<br>portion<br>CD34-<br>MyoD1-<br>Ki-67+<br>15-40%<br>Ag staining<br>(-) | Vim+<br>SMA-/+<br>GFAP+<br>S-100+<br>olig2+<br>portion<br>SOX-10+<br>NeuN-<br>Olig-2+<br>EMA+<br>Ki-67+<br>50%<br>CK-<br>P53+<br>portion<br>CD34-<br>MyoD1-<br>Ki-67+<br>15-40%<br>Ag staining<br>(-) | Vim+<br>SMA-/+<br>GFAP+<br>S-100+<br>olig2+<br>portion<br>SOX-10+<br>NeuN-<br>Olig-2+<br>EMA+<br>Ki-67+<br>50%<br>CK-<br>P53+<br>portion<br>CD34-<br>MyoD1-<br>Ki-67+<br>15-40%<br>Ag staining<br>(-) | S100+<br>Vim+<br>Syn+/-<br>Vim+<br>EMA-<br>PR-<br>Des-<br>Ki67+<br>50% |

NA, no available
