# Supplementary material for: Gliosarcoma: The Distinct Genomic Alterations Identified by Comprehensive Analysis of Copy Number Variations
Source: Hindawi journal article supplement (doi:10.1155/2022/2376288), 2022-06-15
Supplement: f2 [file 2376288.f2.pdf]

|         | Freq_GBM      | GBM           | Freq_Sarcoma | Sarcoma      | Odds_ratio   | Odds         |
|---------|---------------|---------------|--------------|--------------|--------------|--------------|
| A1BG    | 0.1428571429  | 0.1428571429  | 0.0555555556 | 0.0555555556 | 2.333333333  | 2.571428571  |
| 1BG-AS  | 0.1428571429  | 0.1428571429  | 0.0555555556 | 0.0555555556 | 2.333333333  | 2.571428571  |
| A1CF    | 0.04761904762 | 0.04761904762 | 0.0555555556 | 0.0555555556 | 0.7          | 0.8571428571 |
| A2M     | 0.04761904762 | 0.04761904762 | 0.1111111111 | 0.1111111111 | 0.325        | 0.4285714286 |
| A2M-AS  | 0.04761904762 | 0.04761904762 | 0.1111111111 | 0.1111111111 | 0.325        | 0.4285714286 |
| A2ML1   | 0.04761904762 | 0.04761904762 | 0.1111111111 | 0.1111111111 | 0.325        | 0.4285714286 |
| A2MP1   | 0.04761904762 | 0.04761904762 | 0.1111111111 | 0.1111111111 | 0.325        | 0.4285714286 |
| A3GALT  | 0.04761904762 | 0.04761904762 | 0.0555555556 | 0.0555555556 | 0.7          | 0.8571428571 |
| A4GALT  | 0             | 0             | 0.1666666667 | 0.1666666667 | 0            | 0            |
| A4GNT   | 0.1428571429  | 0.1428571429  | 0.0555555556 | 0.0555555556 | 2.333333333  | 2.571428571  |
| AA06    | 0.04761904762 | 0.04761904762 | 0            | 0            | inf          | 4.7619E+31   |
| AAAS    | 0.04761904762 | 0.04761904762 | 0.0555555556 | 0.0555555556 | 0.7          | 0.8571428571 |
| AACS    | 0.09523809524 | 0.09523809524 | 0.0555555556 | 0.0555555556 | 1.473684211  | 1.714285714  |
| AACSP1  | 0.09523809524 | 0.09523809524 | 0.0555555556 | 0.0555555556 | 1.473684211  | 1.714285714  |
| AADAC   | 0.1904761905  | 0.1904761905  | 0.1111111111 | 0.1111111111 | 1.529411765  | 1.714285714  |
| ADACL   | 0.1904761905  | 0.1904761905  | 0.1111111111 | 0.1111111111 | 1.529411765  | 1.714285714  |
| ADACL2- | 0.1904761905  | 0.1904761905  | 0.1111111111 | 0.1111111111 | 1.529411765  | 1.714285714  |
| ADACL0  | 0.04761904762 | 0.04761904762 | 0.1111111111 | 0.1111111111 | 0.325        | 0.4285714286 |
| ADACL0  | 0.04761904762 | 0.04761904762 | 0.1111111111 | 0.1111111111 | 0.325        | 0.4285714286 |
| ADACP   | 0.1904761905  | 0.1904761905  | 0.1111111111 | 0.1111111111 | 1.529411765  | 1.714285714  |
| AADAT   | 0             | 0             | 0.0555555556 | 0.0555555556 | 0            | 0            |
| AAGAB0  | 0.04761904762 | 0.04761904762 | 0.0555555556 | 0.0555555556 | 0.7          | 0.8571428571 |
| AAK1    | 0             | 0             | 0.0555555556 | 0.0555555556 | 0            | 0            |
| AAMP    | 0             | 0             | 0.0555555556 | 0.0555555556 | 0            | 0            |
| AANAT   | 0.04761904762 | 0.04761904762 | 0            | 0            | inf          | 4.7619E+31   |
| AAR2    | 0.09523809524 | 0.09523809524 | 0.1111111111 | 0.1111111111 | 0.6842105263 | 0.8571428571 |
| AARD    | 0.1904761905  | 0.1904761905  | 0.1666666667 | 0.1666666667 | 0.9411764706 | 1.142857143  |
| AARS    | 0.1428571429  | 0.1428571429  | 0.0555555556 | 0.0555555556 | 2.333333333  | 2.571428571  |
| AARS2   | 0.04761904762 | 0.04761904762 | 0.0555555556 | 0.0555555556 | 0.7          | 0.8571428571 |
| AARSD1  | 0.04761904762 | 0.04761904762 | 0            | 0            | inf          | 4.7619E+31   |
| AASDH   | 0.1904761905  | 0.1904761905  | 0.0555555556 | 0.0555555556 | 3.294117647  | 3.428571429  |
| AASS    | 0.04761904762 | 0.04761904762 | 0.0555555556 | 0.0555555556 | 0.7          | 0.8571428571 |
| AATBC   | 0.04761904762 | 0.04761904762 | 0.1111111111 | 0.1111111111 | 0.325        | 0.4285714286 |
| AATF    | 0.04761904762 | 0.04761904762 | 0            | 0            | inf          | 4.7619E+31   |
| AATK    | 0.04761904762 | 0.04761904762 | 0            | 0            | inf          | 4.7619E+31   |
| ABALON  | 0.09523809524 | 0.09523809524 | 0.1111111111 | 0.1111111111 | 0.6842105263 | 0.8571428571 |
| ABAT    | 0.09523809524 | 0.09523809524 | 0            | 0            | inf          | 9.52381E+31  |
| ABCA1   | 0.04761904762 | 0.04761904762 | 0.0555555556 | 0.0555555556 | 0.7          | 0.8571428571 |
| ABCA10  | 0             | 0             | 0            | 0            |              | 0.00001      |
| ABCA11  | 0.04761904762 | 0.04761904762 | 0            | 0            | inf          | 4.7619E+31   |
| ABCA12  | 0             | 0             | 0.0555555556 | 0.0555555556 | 0            | 0            |
| ABCA13  | 0.09523809524 | 0.09523809524 | 0.2222222222 | 0.2222222222 | 0.2894736842 | 0.4285714286 |
| ABCA17  | 0.09523809524 | 0.09523809524 | 0.2222222222 | 0.2222222222 | 0.2894736842 | 0.4285714286 |
| ABCA2   | 0.1428571429  | 0.1428571429  | 0.0555555556 | 0.0555555556 | 2.333333333  | 2.571428571  |
| ABCA3   | 0.09523809524 | 0.09523809524 | 0.2222222222 | 0.2222222222 | 0.2894736842 | 0.4285714286 |
| ABCA4   | 0.04761904762 | 0.04761904762 | 0.0555555556 | 0.0555555556 | 0.7          | 0.8571428571 |
| ABCA5   | 0             | 0             | 0            | 0            |              | 0.00001      |
| ABCA6   | 0             | 0             | 0            | 0            |              | 0.00001      |
| ABCA7   | 0.09523809524 | 0.09523809524 | 0.1111111111 | 0.1111111111 | 0.6842105263 | 0.8571428571 |

|         |               |               |               |               |              |              |
|---------|---------------|---------------|---------------|---------------|--------------|--------------|
| ABCA8   | 0             | 0             | 0             | 0             |              | 0.00001      |
| ABCA9   | 0             | 0             | 0             | 0             |              | 0.00001      |
| BCA9-A  | 0             | 0             | 0             | 0             |              | 0.00001      |
| ABCB1   | 0.09523809524 | 0.09523809524 | 0.05555555556 | 0.05555555556 | 1.473684211  | 1.714285714  |
| ABCB10  | 0.1428571429  | 0.1428571429  | 0             | 0             | inf          | 1.42857E+32  |
| ABCB11  | 0.04761904762 | 0.04761904762 | 0.05555555556 | 0.05555555556 | 0.7          | 0.8571428571 |
| ABCB4   | 0.09523809524 | 0.09523809524 | 0.05555555556 | 0.05555555556 | 1.473684211  | 1.714285714  |
| ABCB5   | 0.04761904762 | 0.04761904762 | 0.2222222222  | 0.2222222222  | 0.1375       | 0.2142857143 |
| ABCB8   | 0.09523809524 | 0.09523809524 | 0.05555555556 | 0.05555555556 | 1.473684211  | 1.714285714  |
| ABCB9   | 0.04761904762 | 0.04761904762 | 0.1111111111  | 0.1111111111  | 0.325        | 0.4285714286 |
| ABCC1   | 0.04761904762 | 0.04761904762 | 0             | 0             | inf          | 4.7619E+31   |
| ABCC10  | 0.04761904762 | 0.04761904762 | 0.05555555556 | 0.05555555556 | 0.7          | 0.8571428571 |
| ABCC11  | 0.04761904762 | 0.04761904762 | 0             | 0             | inf          | 4.7619E+31   |
| ABCC12  | 0.04761904762 | 0.04761904762 | 0             | 0             | inf          | 4.7619E+31   |
| ABCC13  | 0.04761904762 | 0.04761904762 | 0.1111111111  | 0.1111111111  | 0.325        | 0.4285714286 |
| ABCC2   | 0.1428571429  | 0.1428571429  | 0             | 0             | inf          | 1.42857E+32  |
| ABCC3   | 0.09523809524 | 0.09523809524 | 0             | 0             | inf          | 9.52381E+31  |
| ABCC5   | 0.1904761905  | 0.1904761905  | 0.05555555556 | 0.05555555556 | 3.294117647  | 3.428571429  |
| BCC5-A  | 0.1428571429  | 0.1428571429  | 0.05555555556 | 0.05555555556 | 2.333333333  | 2.571428571  |
| ABCC6   | 0.04761904762 | 0.04761904762 | 0             | 0             | inf          | 4.7619E+31   |
| BCC6P   | 0.09523809524 | 0.09523809524 | 0             | 0             | inf          | 9.52381E+31  |
| BCC6P   | 0.04761904762 | 0.04761904762 | 0             | 0             | inf          | 4.7619E+31   |
| ABCC9   | 0.04761904762 | 0.04761904762 | 0.05555555556 | 0.05555555556 | 0.7          | 0.8571428571 |
| ABCD2   | 0.04761904762 | 0.04761904762 | 0.05555555556 | 0.05555555556 | 0.7          | 0.8571428571 |
| ABCD3   | 0.04761904762 | 0.04761904762 | 0.05555555556 | 0.05555555556 | 0.7          | 0.8571428571 |
| ABCD4   | 0.04761904762 | 0.04761904762 | 0             | 0             | inf          | 4.7619E+31   |
| ABCE1   | 0             | 0             | 0.05555555556 | 0.05555555556 | 0            | 0            |
| ABCF2   | 0.09523809524 | 0.09523809524 | 0.05555555556 | 0.05555555556 | 1.473684211  | 1.714285714  |
| ABCF3   | 0.1428571429  | 0.1428571429  | 0.05555555556 | 0.05555555556 | 2.333333333  | 2.571428571  |
| ABCG1   | 0.04761904762 | 0.04761904762 | 0.1111111111  | 0.1111111111  | 0.325        | 0.4285714286 |
| ABCG2   | 0             | 0             | 0.05555555556 | 0.05555555556 | 0            | 0            |
| ABCG5   | 0             | 0             | 0.05555555556 | 0.05555555556 | 0            | 0            |
| ABCG8   | 0             | 0             | 0.05555555556 | 0.05555555556 | 0            | 0            |
| ABHD10  | 0.09523809524 | 0.09523809524 | 0.05555555556 | 0.05555555556 | 1.473684211  | 1.714285714  |
| ABHD11  | 0.1428571429  | 0.1428571429  | 0.1111111111  | 0.1111111111  | 1.083333333  | 1.285714286  |
| BHD11-A | 0.1428571429  | 0.1428571429  | 0.1111111111  | 0.1111111111  | 1.083333333  | 1.285714286  |
| ABHD12  | 0.1904761905  | 0.1904761905  | 0.05555555556 | 0.05555555556 | 3.294117647  | 3.428571429  |
| BHD14   | 0.04761904762 | 0.04761904762 | 0             | 0             | inf          | 4.7619E+31   |
| D14A-A  | 0.04761904762 | 0.04761904762 | 0             | 0             | inf          | 4.7619E+31   |
| BHD14   | 0.04761904762 | 0.04761904762 | 0             | 0             | inf          | 4.7619E+31   |
| ABHD15  | 0             | 0             | 0.05555555556 | 0.05555555556 | 0            | 0            |
| BHD16   | 0.04761904762 | 0.04761904762 | 0             | 0             | inf          | 4.7619E+31   |
| BHD16   | 0.1428571429  | 0.1428571429  | 0.2222222222  | 0.2222222222  | 0.4583333333 | 0.6428571429 |
| BHD17   | 0.09523809524 | 0.09523809524 | 0.1111111111  | 0.1111111111  | 0.6842105263 | 0.8571428571 |
| BHD17   | 0             | 0             | 0.05555555556 | 0.05555555556 | 0            | 0            |
| BHD17   | 0.04761904762 | 0.04761904762 | 0.05555555556 | 0.05555555556 | 0.7          | 0.8571428571 |
| ABHD18  | 0             | 0             | 0.05555555556 | 0.05555555556 | 0            | 0            |
| ABHD2   | 0.04761904762 | 0.04761904762 | 0.05555555556 | 0.05555555556 | 0.7          | 0.8571428571 |
| ABHD3   | 0.04761904762 | 0.04761904762 | 0.1111111111  | 0.1111111111  | 0.325        | 0.4285714286 |
| ABHD4   | 0             | 0             | 0.05555555556 | 0.05555555556 | 0            | 0            |
| ABHD5   | 0.04761904762 | 0.04761904762 | 0             | 0             | inf          | 4.7619E+31   |

|        |               |               |               |               |              |              |
|--------|---------------|---------------|---------------|---------------|--------------|--------------|
| ABHD6  | 0.04761904762 | 0.04761904762 | 0             | 0             | inf          | 4.7619E+31   |
| ABHD8  | 0.1428571429  | 0.1428571429  | 0.1111111111  | 0.1111111111  | 1.083333333  | 1.285714286  |
| ABI1   | 0.09523809524 | 0.09523809524 | 0.1111111111  | 0.1111111111  | 0.6842105263 | 0.8571428571 |
| ABI2   | 0.09523809524 | 0.09523809524 | 0.05555555556 | 0.05555555556 | 1.473684211  | 1.714285714  |
| ABI3   | 0.1428571429  | 0.1428571429  | 0             | 0             | inf          | 1.42857E+32  |
| ABI3BP | 0.09523809524 | 0.09523809524 | 0.05555555556 | 0.05555555556 | 1.473684211  | 1.714285714  |
| BITRAN | 0.04761904762 | 0.04761904762 | 0.05555555556 | 0.05555555556 | 0.7          | 0.8571428571 |
| ABL1   | 0.09523809524 | 0.09523809524 | 0.05555555556 | 0.05555555556 | 1.473684211  | 1.714285714  |
| ABL2   | 0.1428571429  | 0.1428571429  | 0             | 0             | inf          | 1.42857E+32  |
| ABLIM1 | 0.1904761905  | 0.1904761905  | 0.05555555556 | 0.05555555556 | 3.294117647  | 3.428571429  |
| ABO    | 0.04761904762 | 0.04761904762 | 0             | 0             | inf          | 4.7619E+31   |
| ABR    | 0             | 0             | 0.1111111111  | 0.1111111111  | 0            | 0            |
| ABRA   | 0.1904761905  | 0.1904761905  | 0.1111111111  | 0.1111111111  | 1.529411765  | 1.714285714  |
| BRAXAS | 0             | 0             | 0.05555555556 | 0.05555555556 | 0            | 0            |
| BRAXAS | 0.2380952381  | 0.2380952381  | 0.05555555556 | 0.05555555556 | 4.375        | 4.285714286  |
| ACAA1  | 0.04761904762 | 0.04761904762 | 0             | 0             | inf          | 4.7619E+31   |
| ACAA2  | 0.04761904762 | 0.04761904762 | 0             | 0             | inf          | 4.7619E+31   |
| ACACA  | 0.04761904762 | 0.04761904762 | 0             | 0             | inf          | 4.7619E+31   |
| ACACB  | 0             | 0             | 0.05555555556 | 0.05555555556 | 0            | 0            |
| ACAD10 | 0             | 0             | 0.1111111111  | 0.1111111111  | 0            | 0            |
| ACAD11 | 0.1428571429  | 0.1428571429  | 0.05555555556 | 0.05555555556 | 2.333333333  | 2.571428571  |
| ACAD9  | 0.09523809524 | 0.09523809524 | 0.05555555556 | 0.05555555556 | 1.473684211  | 1.714285714  |
| ACADL  | 0             | 0             | 0.05555555556 | 0.05555555556 | 0            | 0            |
| ACADM  | 0.04761904762 | 0.04761904762 | 0.05555555556 | 0.05555555556 | 0.7          | 0.8571428571 |
| ACADS  | 0             | 0             | 0.1111111111  | 0.1111111111  | 0            | 0            |
| ACADSE | 0.2380952381  | 0.2380952381  | 0.05555555556 | 0.05555555556 | 4.375        | 4.285714286  |
| ACADV1 | 0             | 0             | 0.05555555556 | 0.05555555556 | 0            | 0            |
| ACAN   | 0.04761904762 | 0.04761904762 | 0.05555555556 | 0.05555555556 | 0.7          | 0.8571428571 |
| ACAP1  | 0             | 0             | 0.05555555556 | 0.05555555556 | 0            | 0            |
| ACAP2  | 0.1428571429  | 0.1428571429  | 0.05555555556 | 0.05555555556 | 2.333333333  | 2.571428571  |
| ACAP3  | 0             | 0             | 0.1111111111  | 0.1111111111  | 0            | 0            |
| ACBD3  | 0.1428571429  | 0.1428571429  | 0.05555555556 | 0.05555555556 | 2.333333333  | 2.571428571  |
| CBD3-A | 0.1428571429  | 0.1428571429  | 0.05555555556 | 0.05555555556 | 2.333333333  | 2.571428571  |
| ACBD4  | 0.1428571429  | 0.1428571429  | 0             | 0             | inf          | 1.42857E+32  |
| ACBD5  | 0.09523809524 | 0.09523809524 | 0.1111111111  | 0.1111111111  | 0.6842105263 | 0.8571428571 |
| ACBD6  | 0.1428571429  | 0.1428571429  | 0             | 0             | inf          | 1.42857E+32  |
| ACBD7  | 0.09523809524 | 0.09523809524 | 0.1111111111  | 0.1111111111  | 0.6842105263 | 0.8571428571 |
| 7-DCLR | 0.09523809524 | 0.09523809524 | 0.1111111111  | 0.1111111111  | 0.6842105263 | 0.8571428571 |
| ACD    | 0.1428571429  | 0.1428571429  | 0.05555555556 | 0.05555555556 | 2.333333333  | 2.571428571  |
| ACE    | 0.04761904762 | 0.04761904762 | 0             | 0             | inf          | 4.7619E+31   |
| ACER1  | 0.1428571429  | 0.1428571429  | 0.05555555556 | 0.05555555556 | 2.333333333  | 2.571428571  |
| ACER2  | 0.04761904762 | 0.04761904762 | 0.05555555556 | 0.05555555556 | 0.7          | 0.8571428571 |
| ACHE   | 0.04761904762 | 0.04761904762 | 0.05555555556 | 0.05555555556 | 0.7          | 0.8571428571 |
| ACIN1  | 0             | 0             | 0.05555555556 | 0.05555555556 | 0            | 0            |
| ACKR1  | 0.1428571429  | 0.1428571429  | 0             | 0             | inf          | 1.42857E+32  |
| ACKR2  | 0.04761904762 | 0.04761904762 | 0             | 0             | inf          | 4.7619E+31   |
| ACKR3  | 0             | 0             | 0.05555555556 | 0.05555555556 | 0            | 0            |
| ACKR4  | 0.1428571429  | 0.1428571429  | 0.05555555556 | 0.05555555556 | 2.333333333  | 2.571428571  |
| ACLY   | 0.09523809524 | 0.09523809524 | 0             | 0             | inf          | 9.52381E+31  |
| ACMSD  | 0.04761904762 | 0.04761904762 | 0.05555555556 | 0.05555555556 | 0.7          | 0.8571428571 |
| ACO1   | 0.09523809524 | 0.09523809524 | 0.05555555556 | 0.05555555556 | 1.473684211  | 1.714285714  |

|        |               |               |              |              |              |              |
|--------|---------------|---------------|--------------|--------------|--------------|--------------|
| ACO2   | 0             | 0             | 0.1111111111 | 0.1111111111 | 0            | 0            |
| ACOD1  | 0             | 0             | 0.0555555556 | 0.0555555556 | 0            | 0            |
| ACOT1  | 0.09523809524 | 0.09523809524 | 0            | 0            | inf          | 9.52381E+31  |
| ACOT11 | 0.04761904762 | 0.04761904762 | 0.0555555556 | 0.0555555556 | 0.7          | 0.8571428571 |
| ACOT12 | 0.04761904762 | 0.04761904762 | 0            | 0            | inf          | 4.7619E+31   |
| ACOT13 | 0             | 0             | 0.0555555556 | 0.0555555556 | 0            | 0            |
| ACOT2  | 0.09523809524 | 0.09523809524 | 0            | 0            | inf          | 9.52381E+31  |
| ACOT4  | 0.09523809524 | 0.09523809524 | 0            | 0            | inf          | 9.52381E+31  |
| ACOT6  | 0.09523809524 | 0.09523809524 | 0            | 0            | inf          | 9.52381E+31  |
| ACOT7  | 0             | 0             | 0.0555555556 | 0.0555555556 | 0            | 0            |
| ACOT8  | 0.1428571429  | 0.1428571429  | 0.1666666667 | 0.1666666667 | 0.6666666667 | 0.8571428571 |
| ACOX1  | 0.04761904762 | 0.04761904762 | 0            | 0            | inf          | 4.7619E+31   |
| ACOX2  | 0.04761904762 | 0.04761904762 | 0            | 0            | inf          | 4.7619E+31   |
| ACOXL  | 0             | 0             | 0.0555555556 | 0.0555555556 | 0            | 0            |
| COXL-A | 0             | 0             | 0.0555555556 | 0.0555555556 | 0            | 0            |
| ACPI   | 0             | 0             | 0.0555555556 | 0.0555555556 | 0            | 0            |
| ACP2   | 0             | 0             | 0.0555555556 | 0.0555555556 | 0            | 0            |
| ACP4   | 0.09523809524 | 0.09523809524 | 0.0555555556 | 0.0555555556 | 1.473684211  | 1.714285714  |
| ACP5   | 0.1428571429  | 0.1428571429  | 0.1111111111 | 0.1111111111 | 1.083333333  | 1.285714286  |
| ACP6   | 0.1428571429  | 0.1428571429  | 0.0555555556 | 0.0555555556 | 2.333333333  | 2.571428571  |
| ACP7   | 0.04761904762 | 0.04761904762 | 0.0555555556 | 0.0555555556 | 0.7          | 0.8571428571 |
| ACPP   | 0.1428571429  | 0.1428571429  | 0.0555555556 | 0.0555555556 | 2.333333333  | 2.571428571  |
| ACR    | 0             | 0             | 0.1111111111 | 0.1111111111 | 0            | 0            |
| ACRBP  | 0.04761904762 | 0.04761904762 | 0.1111111111 | 0.1111111111 | 0.325        | 0.4285714286 |
| ACSBG1 | 0.04761904762 | 0.04761904762 | 0.0555555556 | 0.0555555556 | 0.7          | 0.8571428571 |
| ACSBG2 | 0.1428571429  | 0.1428571429  | 0.0555555556 | 0.0555555556 | 2.333333333  | 2.571428571  |
| ACSF2  | 0.09523809524 | 0.09523809524 | 0            | 0            | inf          | 9.52381E+31  |
| ACSF3  | 0.09523809524 | 0.09523809524 | 0            | 0            | inf          | 9.52381E+31  |
| ACSL1  | 0             | 0             | 0.0555555556 | 0.0555555556 | 0            | 0            |
| ACSL3  | 0             | 0             | 0.0555555556 | 0.0555555556 | 0            | 0            |
| ACSL5  | 0.1428571429  | 0.1428571429  | 0.0555555556 | 0.0555555556 | 2.333333333  | 2.571428571  |
| ACSL6  | 0.04761904762 | 0.04761904762 | 0            | 0            | inf          | 4.7619E+31   |
| ACSM1  | 0.04761904762 | 0.04761904762 | 0            | 0            | inf          | 4.7619E+31   |
| ACSM2A | 0.04761904762 | 0.04761904762 | 0            | 0            | inf          | 4.7619E+31   |
| ACSM2B | 0.04761904762 | 0.04761904762 | 0            | 0            | inf          | 4.7619E+31   |
| ACSM3  | 0.04761904762 | 0.04761904762 | 0            | 0            | inf          | 4.7619E+31   |
| ACSM4  | 0.04761904762 | 0.04761904762 | 0.1111111111 | 0.1111111111 | 0.325        | 0.4285714286 |
| ACSM5  | 0.04761904762 | 0.04761904762 | 0            | 0            | inf          | 4.7619E+31   |
| ACSM6  | 0.1428571429  | 0.1428571429  | 0            | 0            | inf          | 1.42857E+32  |
| ACSS1  | 0.1904761905  | 0.1904761905  | 0.0555555556 | 0.0555555556 | 3.294117647  | 3.428571429  |
| ACSS2  | 0.09523809524 | 0.09523809524 | 0.1111111111 | 0.1111111111 | 0.6842105263 | 0.8571428571 |
| ACSS3  | 0.04761904762 | 0.04761904762 | 0.0555555556 | 0.0555555556 | 0.7          | 0.8571428571 |
| ACTA1  | 0.1428571429  | 0.1428571429  | 0            | 0            | inf          | 1.42857E+32  |
| ACTA2  | 0.1428571429  | 0.1428571429  | 0.1666666667 | 0.1666666667 | 0.6666666667 | 0.8571428571 |
| CTA2-A | 0.1428571429  | 0.1428571429  | 0.1666666667 | 0.1666666667 | 0.6666666667 | 0.8571428571 |
| ACTB   | 0.04761904762 | 0.04761904762 | 0.1666666667 | 0.1666666667 | 0.2          | 0.2857142857 |
| ACTBL2 | 0.04761904762 | 0.04761904762 | 0            | 0            | inf          | 4.7619E+31   |
| ACTG1  | 0.04761904762 | 0.04761904762 | 0            | 0            | inf          | 4.7619E+31   |
| CTG1P1 | 0.04761904762 | 0.04761904762 | 0.0555555556 | 0.0555555556 | 0.7          | 0.8571428571 |
| CTG1P2 | 0.04761904762 | 0.04761904762 | 0.1111111111 | 0.1111111111 | 0.325        | 0.4285714286 |
| CTG1P  | 0.04761904762 | 0.04761904762 | 0.0555555556 | 0.0555555556 | 0.7          | 0.8571428571 |

|        |               |               |               |               |               |              |
|--------|---------------|---------------|---------------|---------------|---------------|--------------|
| ACTG2  | 0             | 0             | 0.05555555556 | 0.05555555556 | 0             | 0            |
| ACTL10 | 0.09523809524 | 0.09523809524 | 0.11111111111 | 0.11111111111 | 0.6842105263  | 0.8571428571 |
| ACTL6A | 0.1904761905  | 0.1904761905  | 0.05555555556 | 0.05555555556 | 3.294117647   | 3.428571429  |
| ACTL6B | 0.04761904762 | 0.04761904762 | 0.05555555556 | 0.05555555556 | 0.7           | 0.8571428571 |
| ACTL7A | 0.04761904762 | 0.04761904762 | 0.05555555556 | 0.05555555556 | 0.7           | 0.8571428571 |
| ACTL7B | 0.04761904762 | 0.04761904762 | 0.05555555556 | 0.05555555556 | 0.7           | 0.8571428571 |
| ACTL8  | 0.04761904762 | 0.04761904762 | 0.05555555556 | 0.05555555556 | 0.7           | 0.8571428571 |
| ACTL9  | 0.1428571429  | 0.1428571429  | 0.05555555556 | 0.05555555556 | 2.333333333   | 2.571428571  |
| ACTN2  | 0.1428571429  | 0.1428571429  | 0             | 0             | inf           | 1.42857E+32  |
| ACTN4  | 0.04761904762 | 0.04761904762 | 0.05555555556 | 0.05555555556 | 0.7           | 0.8571428571 |
| ACTR10 | 0.04761904762 | 0.04761904762 | 0             | 0             | inf           | 4.7619E+31   |
| ACTR1A | 0.1428571429  | 0.1428571429  | 0.05555555556 | 0.05555555556 | 2.333333333   | 2.571428571  |
| ACTR1B | 0             | 0             | 0.11111111111 | 0.11111111111 | 0             | 0            |
| ACTR2  | 0             | 0             | 0.05555555556 | 0.05555555556 | 0             | 0            |
| ACTR3  | 0             | 0             | 0.05555555556 | 0.05555555556 | 0             | 0            |
| CTR3-A | 0             | 0             | 0.05555555556 | 0.05555555556 | 0             | 0            |
| ACTR3B | 0.09523809524 | 0.09523809524 | 0.05555555556 | 0.05555555556 | 1.473684211   | 1.714285714  |
| CTR3B1 | 0.04761904762 | 0.04761904762 | 0.05555555556 | 0.05555555556 | 0.7           | 0.8571428571 |
| CTR3B2 | 0.09523809524 | 0.09523809524 | 0.11111111111 | 0.11111111111 | 0.6842105263  | 0.8571428571 |
| ACTR3C | 0.09523809524 | 0.09523809524 | 0.05555555556 | 0.05555555556 | 1.473684211   | 1.714285714  |
| ACTR5  | 0.1428571429  | 0.1428571429  | 0.22222222222 | 0.22222222222 | 0.45833333333 | 0.6428571429 |
| ACTR6  | 0.04761904762 | 0.04761904762 | 0.05555555556 | 0.05555555556 | 0.7           | 0.8571428571 |
| ACTR8  | 0.04761904762 | 0.04761904762 | 0             | 0             | inf           | 4.7619E+31   |
| ACTRT2 | 0             | 0             | 0.05555555556 | 0.05555555556 | 0             | 0            |
| ACTRT3 | 0.1904761905  | 0.1904761905  | 0.05555555556 | 0.05555555556 | 3.294117647   | 3.428571429  |
| ACVR1  | 0             | 0             | 0.05555555556 | 0.05555555556 | 0             | 0            |
| ACVR1B | 0.04761904762 | 0.04761904762 | 0.05555555556 | 0.05555555556 | 0.7           | 0.8571428571 |
| ACVR1C | 0             | 0             | 0.05555555556 | 0.05555555556 | 0             | 0            |
| ACVR2A | 0             | 0             | 0.05555555556 | 0.05555555556 | 0             | 0            |
| ACVR2B | 0.04761904762 | 0.04761904762 | 0             | 0             | inf           | 4.7619E+31   |
| VR2B-A | 0.04761904762 | 0.04761904762 | 0             | 0             | inf           | 4.7619E+31   |
| ACVRL1 | 0.04761904762 | 0.04761904762 | 0.05555555556 | 0.05555555556 | 0.7           | 0.8571428571 |
| ACY1   | 0.04761904762 | 0.04761904762 | 0             | 0             | inf           | 4.7619E+31   |
| ACYP2  | 0.04761904762 | 0.04761904762 | 0.05555555556 | 0.05555555556 | 0.7           | 0.8571428571 |
| ADA    | 0.1428571429  | 0.1428571429  | 0.16666666667 | 0.16666666667 | 0.66666666667 | 0.8571428571 |
| ADA2   | 0.04761904762 | 0.04761904762 | 0             | 0             | inf           | 4.7619E+31   |
| ADAD1  | 0             | 0             | 0.05555555556 | 0.05555555556 | 0             | 0            |
| ADAD2  | 0.04761904762 | 0.04761904762 | 0             | 0             | inf           | 4.7619E+31   |
| ADAM10 | 0.04761904762 | 0.04761904762 | 0.05555555556 | 0.05555555556 | 0.7           | 0.8571428571 |
| ADAM11 | 0.09523809524 | 0.09523809524 | 0             | 0             | inf           | 9.52381E+31  |
| ADAM12 | 0.2380952381  | 0.2380952381  | 0.05555555556 | 0.05555555556 | 4.375         | 4.285714286  |
| ADAM15 | 0.1904761905  | 0.1904761905  | 0.11111111111 | 0.11111111111 | 1.529411765   | 1.714285714  |
| ADAM17 | 0             | 0             | 0.05555555556 | 0.05555555556 | 0             | 0            |
| ADAM18 | 0.09523809524 | 0.09523809524 | 0.11111111111 | 0.11111111111 | 0.6842105263  | 0.8571428571 |
| ADAM19 | 0.04761904762 | 0.04761904762 | 0.05555555556 | 0.05555555556 | 0.7           | 0.8571428571 |
| ADAM1A | 0             | 0             | 0.11111111111 | 0.11111111111 | 0             | 0            |
| ADAM20 | 0.09523809524 | 0.09523809524 | 0.11111111111 | 0.11111111111 | 0.6842105263  | 0.8571428571 |
| ADAM22 | 0.09523809524 | 0.09523809524 | 0.11111111111 | 0.11111111111 | 0.6842105263  | 0.8571428571 |
| ADAM23 | 0             | 0             | 0.05555555556 | 0.05555555556 | 0             | 0            |
| ADAM28 | 0.04761904762 | 0.04761904762 | 0.11111111111 | 0.11111111111 | 0.325         | 0.4285714286 |
| ADAM29 | 0             | 0             | 0.05555555556 | 0.05555555556 | 0             | 0            |

|         |               |               |               |               |              |              |
|---------|---------------|---------------|---------------|---------------|--------------|--------------|
| ADAM30  | 0.04761904762 | 0.04761904762 | 0.05555555556 | 0.05555555556 | 0.7          | 0.8571428571 |
| ADAM32  | 0.09523809524 | 0.09523809524 | 0.11111111111 | 0.11111111111 | 0.6842105263 | 0.8571428571 |
| ADAM33  | 0.1904761905  | 0.1904761905  | 0.05555555556 | 0.05555555556 | 3.294117647  | 3.428571429  |
| ADAM34  | 0.09523809524 | 0.09523809524 | 0.11111111111 | 0.11111111111 | 0.6842105263 | 0.8571428571 |
| ADAM3E  | 0.04761904762 | 0.04761904762 | 0             | 0             | inf          | 4.7619E+31   |
| ADAM50  | 0.09523809524 | 0.09523809524 | 0.11111111111 | 0.11111111111 | 0.6842105263 | 0.8571428571 |
| ADAM60  | 0.04761904762 | 0.04761904762 | 0             | 0             | inf          | 4.7619E+31   |
| ADAM70  | 0.04761904762 | 0.04761904762 | 0.11111111111 | 0.11111111111 | 0.325        | 0.4285714286 |
| ADAM80  | 0.1904761905  | 0.1904761905  | 0             | 0             | inf          | 1.90476E+32  |
| ADAM90  | 0.09523809524 | 0.09523809524 | 0.11111111111 | 0.11111111111 | 0.6842105263 | 0.8571428571 |
| DAMDE0  | 0.04761904762 | 0.04761904762 | 0.11111111111 | 0.11111111111 | 0.325        | 0.4285714286 |
| DAMTS0  | 0.04761904762 | 0.04761904762 | 0.11111111111 | 0.11111111111 | 0.325        | 0.4285714286 |
| DAMTS1  | 0.1428571429  | 0.1428571429  | 0.05555555556 | 0.05555555556 | 2.333333333  | 2.571428571  |
| DAMTS0  | 0.04761904762 | 0.04761904762 | 0.11111111111 | 0.11111111111 | 0.325        | 0.4285714286 |
| DAMTS0  | 0.04761904762 | 0.04761904762 | 0             | 0             | inf          | 4.7619E+31   |
| DAMTS0  | 0.09523809524 | 0.09523809524 | 0             | 0             | inf          | 9.52381E+31  |
| DAMTS1  | 0             | 0             | 0.11111111111 | 0.11111111111 | 0            | 0            |
| DAMTS0  | 0.04761904762 | 0.04761904762 | 0.05555555556 | 0.05555555556 | 0.7          | 0.8571428571 |
| DAMTS0  | 0.09523809524 | 0.09523809524 | 0             | 0             | inf          | 9.52381E+31  |
| DAMTS0  | 0.04761904762 | 0.04761904762 | 0             | 0             | inf          | 4.7619E+31   |
| MTS190  | 0.04761904762 | 0.04761904762 | 0             | 0             | inf          | 4.7619E+31   |
| DAMTS0  | 0.09523809524 | 0.09523809524 | 0.05555555556 | 0.05555555556 | 1.473684211  | 1.714285714  |
| DAMTS0  | 0.04761904762 | 0.04761904762 | 0.05555555556 | 0.05555555556 | 0.7          | 0.8571428571 |
| DAMTS0  | 0.09523809524 | 0.09523809524 | 0.05555555556 | 0.05555555556 | 1.473684211  | 1.714285714  |
| DAMTS0  | 0.1428571429  | 0.1428571429  | 0             | 0             | inf          | 1.42857E+32  |
| DAMTS0  | 0.04761904762 | 0.04761904762 | 0.11111111111 | 0.11111111111 | 0.325        | 0.4285714286 |
| DAMTS0  | 0.04761904762 | 0.04761904762 | 0             | 0             | inf          | 4.7619E+31   |
| DAMTS0  | 0.04761904762 | 0.04761904762 | 0.05555555556 | 0.05555555556 | 0.7          | 0.8571428571 |
| DAMTS70 | 0.04761904762 | 0.04761904762 | 0.05555555556 | 0.05555555556 | 0.7          | 0.8571428571 |
| DAMTS0  | 0.04761904762 | 0.04761904762 | 0             | 0             | inf          | 4.7619E+31   |
| AMTS90  | 0.04761904762 | 0.04761904762 | 0             | 0             | inf          | 4.7619E+31   |
| AMTS90  | 0.04761904762 | 0.04761904762 | 0             | 0             | inf          | 4.7619E+31   |
| DAMTS0  | 0.04761904762 | 0.04761904762 | 0.05555555556 | 0.05555555556 | 0.7          | 0.8571428571 |
| DAMTS0  | 0.04761904762 | 0.04761904762 | 0             | 0             | inf          | 4.7619E+31   |
| DAMTS0  | 0.04761904762 | 0.04761904762 | 0.05555555556 | 0.05555555556 | 0.7          | 0.8571428571 |
| DAMTS0  | 0.1904761905  | 0.1904761905  | 0.05555555556 | 0.05555555556 | 3.294117647  | 3.428571429  |
| MTSL40  | 0.1904761905  | 0.1904761905  | 0.05555555556 | 0.05555555556 | 3.294117647  | 3.428571429  |
| DAMTS0  | 0.09523809524 | 0.09523809524 | 0.11111111111 | 0.11111111111 | 0.6842105263 | 0.8571428571 |
| ADAP10  | 0.04761904762 | 0.04761904762 | 0.16666666667 | 0.16666666667 | 0.2          | 0.2857142857 |
| ADAP20  | 0             | 0             | 0             | 0             |              | 0.00001      |
| ADAR0   | 0.1904761905  | 0.1904761905  | 0.11111111111 | 0.11111111111 | 1.529411765  | 1.714285714  |
| ADARB10 | 0.04761904762 | 0.04761904762 | 0.11111111111 | 0.11111111111 | 0.325        | 0.4285714286 |
| ADARB20 | 0.04761904762 | 0.04761904762 | 0.11111111111 | 0.11111111111 | 0.325        | 0.4285714286 |
| ARB2-A0 | 0.04761904762 | 0.04761904762 | 0.11111111111 | 0.11111111111 | 0.325        | 0.4285714286 |
| ADAT10  | 0.04761904762 | 0.04761904762 | 0             | 0             | inf          | 4.7619E+31   |
| ADAT30  | 0.09523809524 | 0.09523809524 | 0.11111111111 | 0.11111111111 | 0.6842105263 | 0.8571428571 |
| ADCK20  | 0.04761904762 | 0.04761904762 | 0.05555555556 | 0.05555555556 | 0.7          | 0.8571428571 |
| ADCK50  | 0.04761904762 | 0.04761904762 | 0.16666666667 | 0.16666666667 | 0.2          | 0.2857142857 |
| ADCY10  | 0.04761904762 | 0.04761904762 | 0.22222222222 | 0.22222222222 | 0.1375       | 0.2142857143 |
| ADCY10  | 0.1428571429  | 0.1428571429  | 0             | 0             | inf          | 1.42857E+32  |
| DCY10E  | 0             | 0             | 0.05555555556 | 0.05555555556 | 0            | 0            |

|        |               |               |               |               |              |              |
|--------|---------------|---------------|---------------|---------------|--------------|--------------|
| ADCY2  | 0             | 0             | 0.05555555556 | 0.05555555556 | 0            | 0            |
| ADCY5  | 0.04761904762 | 0.04761904762 | 0.05555555556 | 0.05555555556 | 0.7          | 0.8571428571 |
| ADCY6  | 0.04761904762 | 0.04761904762 | 0.05555555556 | 0.05555555556 | 0.7          | 0.8571428571 |
| ADCY7  | 0.04761904762 | 0.04761904762 | 0             | 0             | inf          | 4.7619E+31   |
| ADCY8  | 0.04761904762 | 0.04761904762 | 0.1111111111  | 0.1111111111  | 0.325        | 0.4285714286 |
| ADCY9  | 0.04761904762 | 0.04761904762 | 0.1111111111  | 0.1111111111  | 0.325        | 0.4285714286 |
| DCYAP  | 0.09523809524 | 0.09523809524 | 0             | 0             | inf          | 9.52381E+31  |
| DCYAP1 | 0.04761904762 | 0.04761904762 | 0.1111111111  | 0.1111111111  | 0.325        | 0.4285714286 |
| ADD1   | 0.04761904762 | 0.04761904762 | 0             | 0             | inf          | 4.7619E+31   |
| ADD2   | 0             | 0             | 0.05555555556 | 0.05555555556 | 0            | 0            |
| ADD3   | 0.1428571429  | 0.1428571429  | 0.05555555556 | 0.05555555556 | 2.333333333  | 2.571428571  |
| DD3-AS | 0.1428571429  | 0.1428571429  | 0.05555555556 | 0.05555555556 | 2.333333333  | 2.571428571  |
| ADGRA1 | 0.1904761905  | 0.1904761905  | 0             | 0             | inf          | 1.90476E+32  |
| GRA1-A | 0.1904761905  | 0.1904761905  | 0             | 0             | inf          | 1.90476E+32  |
| ADGRA2 | 0.04761904762 | 0.04761904762 | 0.1111111111  | 0.1111111111  | 0.325        | 0.4285714286 |
| ADGRB1 | 0.04761904762 | 0.04761904762 | 0.1666666667  | 0.1666666667  | 0.2          | 0.2857142857 |
| ADGRB2 | 0.04761904762 | 0.04761904762 | 0.1111111111  | 0.1111111111  | 0.325        | 0.4285714286 |
| ADGRD1 | 0.09523809524 | 0.09523809524 | 0.05555555556 | 0.05555555556 | 1.473684211  | 1.714285714  |
| GRD1-A | 0.09523809524 | 0.09523809524 | 0.05555555556 | 0.05555555556 | 1.473684211  | 1.714285714  |
| ADGRE1 | 0.1428571429  | 0.1428571429  | 0.05555555556 | 0.05555555556 | 2.333333333  | 2.571428571  |
| ADGRE2 | 0.1428571429  | 0.1428571429  | 0.1111111111  | 0.1111111111  | 1.083333333  | 1.285714286  |
| ADGRE3 | 0.1428571429  | 0.1428571429  | 0.1111111111  | 0.1111111111  | 1.083333333  | 1.285714286  |
| ADGRE4 | 0.1428571429  | 0.1428571429  | 0.05555555556 | 0.05555555556 | 2.333333333  | 2.571428571  |
| ADGRE5 | 0.1428571429  | 0.1428571429  | 0.1111111111  | 0.1111111111  | 1.083333333  | 1.285714286  |
| ADGRF1 | 0.04761904762 | 0.04761904762 | 0.05555555556 | 0.05555555556 | 0.7          | 0.8571428571 |
| ADGRF2 | 0.04761904762 | 0.04761904762 | 0.05555555556 | 0.05555555556 | 0.7          | 0.8571428571 |
| ADGRF4 | 0.04761904762 | 0.04761904762 | 0.05555555556 | 0.05555555556 | 0.7          | 0.8571428571 |
| ADGRF5 | 0.04761904762 | 0.04761904762 | 0.05555555556 | 0.05555555556 | 0.7          | 0.8571428571 |
| ADGRG1 | 0.04761904762 | 0.04761904762 | 0             | 0             | inf          | 4.7619E+31   |
| ADGRG3 | 0.04761904762 | 0.04761904762 | 0             | 0             | inf          | 4.7619E+31   |
| ADGRG5 | 0.04761904762 | 0.04761904762 | 0             | 0             | inf          | 4.7619E+31   |
| ADGRG7 | 0.09523809524 | 0.09523809524 | 0.05555555556 | 0.05555555556 | 1.473684211  | 1.714285714  |
| ADGRL1 | 0.1428571429  | 0.1428571429  | 0.1111111111  | 0.1111111111  | 1.083333333  | 1.285714286  |
| ADGRL2 | 0.04761904762 | 0.04761904762 | 0.05555555556 | 0.05555555556 | 0.7          | 0.8571428571 |
| ADGRL3 | 0.04761904762 | 0.04761904762 | 0.05555555556 | 0.05555555556 | 0.7          | 0.8571428571 |
| GRL3-A | 0.04761904762 | 0.04761904762 | 0.05555555556 | 0.05555555556 | 0.7          | 0.8571428571 |
| ADGRL4 | 0.04761904762 | 0.04761904762 | 0.05555555556 | 0.05555555556 | 0.7          | 0.8571428571 |
| ADGRV1 | 0.04761904762 | 0.04761904762 | 0             | 0             | inf          | 4.7619E+31   |
| ADH1A  | 0             | 0             | 0.05555555556 | 0.05555555556 | 0            | 0            |
| ADH1B  | 0             | 0             | 0.05555555556 | 0.05555555556 | 0            | 0            |
| ADH1C  | 0             | 0             | 0.05555555556 | 0.05555555556 | 0            | 0            |
| ADH4   | 0             | 0             | 0.05555555556 | 0.05555555556 | 0            | 0            |
| ADH5   | 0             | 0             | 0.05555555556 | 0.05555555556 | 0            | 0            |
| ADH6   | 0             | 0             | 0.05555555556 | 0.05555555556 | 0            | 0            |
| ADH7   | 0             | 0             | 0.05555555556 | 0.05555555556 | 0            | 0            |
| ADHFE1 | 0.1428571429  | 0.1428571429  | 0.1666666667  | 0.1666666667  | 0.6666666667 | 0.8571428571 |
| ADH1   | 0             | 0             | 0.05555555556 | 0.05555555556 | 0            | 0            |
| ADIG   | 0.1428571429  | 0.1428571429  | 0.1666666667  | 0.1666666667  | 0.6666666667 | 0.8571428571 |
| ADIPOQ | 0.09523809524 | 0.09523809524 | 0.05555555556 | 0.05555555556 | 1.473684211  | 1.714285714  |
| IPOQ-A | 0.09523809524 | 0.09523809524 | 0.05555555556 | 0.05555555556 | 1.473684211  | 1.714285714  |
| DIPOR  | 0.1428571429  | 0.1428571429  | 0             | 0             | inf          | 1.42857E+32  |

|                |               |               |              |              |              |              |
|----------------|---------------|---------------|--------------|--------------|--------------|--------------|
| <b>DIPOR</b>   | 0.04761904762 | 0.04761904762 | 0.1666666667 | 0.1666666667 | 0.2          | 0.2857142857 |
| <b>ADIRF</b>   | 0.1428571429  | 0.1428571429  | 0.0555555556 | 0.0555555556 | 2.333333333  | 2.571428571  |
| <b>ADK</b>     | 0.1904761905  | 0.1904761905  | 0.0555555556 | 0.0555555556 | 3.294117647  | 3.428571429  |
| <b>ADM2</b>    | 0             | 0             | 0.1111111111 | 0.1111111111 | 0            | 0            |
| <b>ADM5</b>    | 0.09523809524 | 0.09523809524 | 0.1111111111 | 0.1111111111 | 0.6842105263 | 0.8571428571 |
| <b>ADNP</b>    | 0.09523809524 | 0.09523809524 | 0.1666666667 | 0.1666666667 | 0.4210526316 | 0.5714285714 |
| <b>DNP-AS</b>  | 0.09523809524 | 0.09523809524 | 0.1666666667 | 0.1666666667 | 0.4210526316 | 0.5714285714 |
| <b>ADNP2</b>   | 0.04761904762 | 0.04761904762 | 0.0555555556 | 0.0555555556 | 0.7          | 0.8571428571 |
| <b>ADO</b>     | 0.04761904762 | 0.04761904762 | 0.1666666667 | 0.1666666667 | 0.2          | 0.2857142857 |
| <b>ADORA1</b>  | 0.1428571429  | 0.1428571429  | 0            | 0            | inf          | 1.42857E+32  |
| <b>DORA2</b>   | 0.04761904762 | 0.04761904762 | 0.1111111111 | 0.1111111111 | 0.325        | 0.4285714286 |
| <b>DRA2A-</b>  | 0.04761904762 | 0.04761904762 | 0.1111111111 | 0.1111111111 | 0.325        | 0.4285714286 |
| <b>DORA2</b>   | 0.04761904762 | 0.04761904762 | 0.0555555556 | 0.0555555556 | 0.7          | 0.8571428571 |
| <b>ADORA3</b>  | 0.04761904762 | 0.04761904762 | 0            | 0            | inf          | 4.7619E+31   |
| <b>ADPGK</b>   | 0.04761904762 | 0.04761904762 | 0.0555555556 | 0.0555555556 | 0.7          | 0.8571428571 |
| <b>DPGK-A</b>  | 0.04761904762 | 0.04761904762 | 0.0555555556 | 0.0555555556 | 0.7          | 0.8571428571 |
| <b>ADPRH</b>   | 0.09523809524 | 0.09523809524 | 0.0555555556 | 0.0555555556 | 1.473684211  | 1.714285714  |
| <b>DPRHL</b>   | 0.04761904762 | 0.04761904762 | 0.0555555556 | 0.0555555556 | 0.7          | 0.8571428571 |
| <b>ADPRM</b>   | 0.04761904762 | 0.04761904762 | 0.0555555556 | 0.0555555556 | 0.7          | 0.8571428571 |
| <b>ADRA1A</b>  | 0.04761904762 | 0.04761904762 | 0.1111111111 | 0.1111111111 | 0.325        | 0.4285714286 |
| <b>ADRA1B</b>  | 0.04761904762 | 0.04761904762 | 0.0555555556 | 0.0555555556 | 0.7          | 0.8571428571 |
| <b>ADRA1L</b>  | 0.1904761905  | 0.1904761905  | 0.0555555556 | 0.0555555556 | 3.294117647  | 3.428571429  |
| <b>ADRA2A</b>  | 0.1428571429  | 0.1428571429  | 0.0555555556 | 0.0555555556 | 2.333333333  | 2.571428571  |
| <b>ADRA2B</b>  | 0             | 0             | 0.1111111111 | 0.1111111111 | 0            | 0            |
| <b>ADRA2C</b>  | 0.04761904762 | 0.04761904762 | 0            | 0            | inf          | 4.7619E+31   |
| <b>ADRB1</b>   | 0.1428571429  | 0.1428571429  | 0.0555555556 | 0.0555555556 | 2.333333333  | 2.571428571  |
| <b>ADRB3</b>   | 0.09523809524 | 0.09523809524 | 0.1111111111 | 0.1111111111 | 0.6842105263 | 0.8571428571 |
| <b>ADRM1</b>   | 0.1428571429  | 0.1428571429  | 0.2222222222 | 0.2222222222 | 0.4583333333 | 0.6428571429 |
| <b>ADSL</b>    | 0             | 0             | 0.1111111111 | 0.1111111111 | 0            | 0            |
| <b>ADSS</b>    | 0.1428571429  | 0.1428571429  | 0.0555555556 | 0.0555555556 | 2.333333333  | 2.571428571  |
| <b>ADTRP</b>   | 0.04761904762 | 0.04761904762 | 0            | 0            | inf          | 4.7619E+31   |
| <b>AEBP1</b>   | 0.04761904762 | 0.04761904762 | 0.1666666667 | 0.1666666667 | 0.2          | 0.2857142857 |
| <b>AEBP2</b>   | 0.04761904762 | 0.04761904762 | 0.1111111111 | 0.1111111111 | 0.325        | 0.4285714286 |
| <b>AEN</b>     | 0.04761904762 | 0.04761904762 | 0.0555555556 | 0.0555555556 | 0.7          | 0.8571428571 |
| <b>AFAP1L</b>  | 0.1904761905  | 0.1904761905  | 0.0555555556 | 0.0555555556 | 3.294117647  | 3.428571429  |
| <b>AFF1</b>    | 0             | 0             | 0.0555555556 | 0.0555555556 | 0            | 0            |
| <b>FF1-AS</b>  | 0             | 0             | 0.0555555556 | 0.0555555556 | 0            | 0            |
| <b>AFF3</b>    | 0             | 0             | 0.0555555556 | 0.0555555556 | 0            | 0            |
| <b>AFF4</b>    | 0.04761904762 | 0.04761904762 | 0            | 0            | inf          | 4.7619E+31   |
| <b>AFG1L</b>   | 0             | 0             | 0            | 0            |              | 0.00001      |
| <b>AFG3L1</b>  | 0.09523809524 | 0.09523809524 | 0            | 0            | inf          | 9.52381E+31  |
| <b>AFG3L2</b>  | 0.09523809524 | 0.09523809524 | 0.0555555556 | 0.0555555556 | 1.473684211  | 1.714285714  |
| <b>AFM</b>     | 0.09523809524 | 0.09523809524 | 0.0555555556 | 0.0555555556 | 1.473684211  | 1.714285714  |
| <b>AFMID</b>   | 0.04761904762 | 0.04761904762 | 0            | 0            | inf          | 4.7619E+31   |
| <b>AFP</b>     | 0.09523809524 | 0.09523809524 | 0.0555555556 | 0.0555555556 | 1.473684211  | 1.714285714  |
| <b>AFTPH</b>   | 0             | 0             | 0.0555555556 | 0.0555555556 | 0            | 0            |
| <b>AGA</b>     | 0             | 0             | 0.0555555556 | 0.0555555556 | 0            | 0            |
| <b>AGAP1</b>   | 0             | 0             | 0.0555555556 | 0.0555555556 | 0            | 0            |
| <b>GAP1-IT</b> | 0             | 0             | 0.0555555556 | 0.0555555556 | 0            | 0            |
| <b>GAP10</b>   | 0.1428571429  | 0.1428571429  | 0.0555555556 | 0.0555555556 | 2.333333333  | 2.571428571  |
| <b>AGAP11</b>  | 0.1428571429  | 0.1428571429  | 0.0555555556 | 0.0555555556 | 2.333333333  | 2.571428571  |



|        |               |               |              |              |              |              |
|--------|---------------|---------------|--------------|--------------|--------------|--------------|
| GAP121 | 0.1428571429  | 0.1428571429  | 0.0555555556 | 0.0555555556 | 2.333333333  | 2.571428571  |
| AGAP2  | 0.1428571429  | 0.1428571429  | 0.0555555556 | 0.0555555556 | 2.333333333  | 2.571428571  |
| GAP2-A | 0.1428571429  | 0.1428571429  | 0.0555555556 | 0.0555555556 | 2.333333333  | 2.571428571  |
| AGAP3  | 0.09523809524 | 0.09523809524 | 0.0555555556 | 0.0555555556 | 1.473684211  | 1.714285714  |
| AGAP4  | 0.1428571429  | 0.1428571429  | 0.0555555556 | 0.0555555556 | 2.333333333  | 2.571428571  |
| AGAP5  | 0.1904761905  | 0.1904761905  | 0.0555555556 | 0.0555555556 | 3.294117647  | 3.428571429  |
| AGAP6  | 0.04761904762 | 0.04761904762 | 0.0555555556 | 0.0555555556 | 0.7          | 0.8571428571 |
| AGAP7  | 0.04761904762 | 0.04761904762 | 0.0555555556 | 0.0555555556 | 0.7          | 0.8571428571 |
| AGAP9  | 0.1428571429  | 0.1428571429  | 0.0555555556 | 0.0555555556 | 2.333333333  | 2.571428571  |
| AGBL1  | 0.09523809524 | 0.09523809524 | 0.0555555556 | 0.0555555556 | 1.473684211  | 1.714285714  |
| GBL1-A | 0.04761904762 | 0.04761904762 | 0.0555555556 | 0.0555555556 | 0.7          | 0.8571428571 |
| AGBL2  | 0             | 0             | 0.0555555556 | 0.0555555556 | 0            | 0            |
| AGBL3  | 0.04761904762 | 0.04761904762 | 0.0555555556 | 0.0555555556 | 0.7          | 0.8571428571 |
| AGBL4  | 0             | 0             | 0.0555555556 | 0.0555555556 | 0            | 0            |
| GBL4-I | 0             | 0             | 0            | 0            |              | 0.00001      |
| AGER   | 0.04761904762 | 0.04761904762 | 0            | 0            | inf          | 4.7619E+31   |
| AGFG1  | 0             | 0             | 0.0555555556 | 0.0555555556 | 0            | 0            |
| AGFG2  | 0.04761904762 | 0.04761904762 | 0.0555555556 | 0.0555555556 | 0.7          | 0.8571428571 |
| AGGF1  | 0.04761904762 | 0.04761904762 | 0            | 0            | inf          | 4.7619E+31   |
| AGK    | 0.04761904762 | 0.04761904762 | 0.1111111111 | 0.1111111111 | 0.325        | 0.4285714286 |
| AGMAT  | 0.04761904762 | 0.04761904762 | 0.1111111111 | 0.1111111111 | 0.325        | 0.4285714286 |
| AGMO   | 0.04761904762 | 0.04761904762 | 0.2222222222 | 0.2222222222 | 0.1375       | 0.2142857143 |
| AGO1   | 0.04761904762 | 0.04761904762 | 0.0555555556 | 0.0555555556 | 0.7          | 0.8571428571 |
| AGO2   | 0.04761904762 | 0.04761904762 | 0.2222222222 | 0.2222222222 | 0.1375       | 0.2142857143 |
| AGO3   | 0.04761904762 | 0.04761904762 | 0.0555555556 | 0.0555555556 | 0.7          | 0.8571428571 |
| AGO4   | 0.04761904762 | 0.04761904762 | 0.0555555556 | 0.0555555556 | 0.7          | 0.8571428571 |
| AGPAT1 | 0.04761904762 | 0.04761904762 | 0            | 0            | inf          | 4.7619E+31   |
| AGPAT2 | 0.1428571429  | 0.1428571429  | 0.0555555556 | 0.0555555556 | 2.333333333  | 2.571428571  |
| AGPAT3 | 0.04761904762 | 0.04761904762 | 0.1111111111 | 0.1111111111 | 0.325        | 0.4285714286 |
| AGPAT5 | 0.09523809524 | 0.09523809524 | 0.1111111111 | 0.1111111111 | 0.6842105263 | 0.8571428571 |
| AGPS   | 0             | 0             | 0.1111111111 | 0.1111111111 | 0            | 0            |
| AGR2   | 0.04761904762 | 0.04761904762 | 0.2222222222 | 0.2222222222 | 0.1375       | 0.2142857143 |
| AGR3   | 0.04761904762 | 0.04761904762 | 0.2222222222 | 0.2222222222 | 0.1375       | 0.2142857143 |
| AGRN   | 0             | 0             | 0.1111111111 | 0.1111111111 | 0            | 0            |
| AGRP   | 0.1428571429  | 0.1428571429  | 0.0555555556 | 0.0555555556 | 2.333333333  | 2.571428571  |
| AGT    | 0.1428571429  | 0.1428571429  | 0            | 0            | inf          | 1.42857E+32  |
| GTPBP  | 0             | 0             | 0.0555555556 | 0.0555555556 | 0            | 0            |
| AGTRI  | 0.1428571429  | 0.1428571429  | 0.1111111111 | 0.1111111111 | 1.083333333  | 1.285714286  |
| AGTRAI | 0.04761904762 | 0.04761904762 | 0.1111111111 | 0.1111111111 | 0.325        | 0.4285714286 |
| AGXT   | 0             | 0             | 0.0555555556 | 0.0555555556 | 0            | 0            |
| AGXT2  | 0.04761904762 | 0.04761904762 | 0.0555555556 | 0.0555555556 | 0.7          | 0.8571428571 |
| AHCTF1 | 0.1428571429  | 0.1428571429  | 0.0555555556 | 0.0555555556 | 2.333333333  | 2.571428571  |
| HCTF1  | 0             | 0             | 0.0555555556 | 0.0555555556 | 0            | 0            |
| AHCY   | 0.09523809524 | 0.09523809524 | 0.1111111111 | 0.1111111111 | 0.6842105263 | 0.8571428571 |
| AHCYL1 | 0.04761904762 | 0.04761904762 | 0.0555555556 | 0.0555555556 | 0.7          | 0.8571428571 |
| AHCYL2 | 0.04761904762 | 0.04761904762 | 0.0555555556 | 0.0555555556 | 0.7          | 0.8571428571 |
| AHDC1  | 0.04761904762 | 0.04761904762 | 0.1111111111 | 0.1111111111 | 0.325        | 0.4285714286 |
| AHR    | 0.04761904762 | 0.04761904762 | 0.2222222222 | 0.2222222222 | 0.1375       | 0.2142857143 |
| AHRR   | 0             | 0             | 0.0555555556 | 0.0555555556 | 0            | 0            |
| AHSA2P | 0.09523809524 | 0.09523809524 | 0.0555555556 | 0.0555555556 | 1.473684211  | 1.714285714  |
| AHSG   | 0.09523809524 | 0.09523809524 | 0.0555555556 | 0.0555555556 | 1.473684211  | 1.714285714  |

|         |               |               |              |              |             |              |
|---------|---------------|---------------|--------------|--------------|-------------|--------------|
| AHSP    | 0.04761904762 | 0.04761904762 | 0            | 0            | inf         | 4.7619E+31   |
| AICDA   | 0.04761904762 | 0.04761904762 | 0.1111111111 | 0.1111111111 | 0.325       | 0.4285714286 |
| AIDA    | 0.1428571429  | 0.1428571429  | 0.0555555556 | 0.0555555556 | 2.333333333 | 2.571428571  |
| AIF1    | 0.04761904762 | 0.04761904762 | 0            | 0            | inf         | 4.7619E+31   |
| AIF1L   | 0.09523809524 | 0.09523809524 | 0.0555555556 | 0.0555555556 | 1.473684211 | 1.714285714  |
| AIFM2   | 0.09523809524 | 0.09523809524 | 0            | 0            | inf         | 9.52381E+31  |
| AIFM3   | 0.04761904762 | 0.04761904762 | 0.0555555556 | 0.0555555556 | 0.7         | 0.8571428571 |
| AIM2    | 0.1428571429  | 0.1428571429  | 0            | 0            | inf         | 1.42857E+32  |
| AIMP1   | 0             | 0             | 0.0555555556 | 0.0555555556 | 0           | 0            |
| AIMP2   | 0.04761904762 | 0.04761904762 | 0.1666666667 | 0.1666666667 | 0.2         | 0.2857142857 |
| AIPL1   | 0             | 0             | 0.0555555556 | 0.0555555556 | 0           | 0            |
| AIRE    | 0.04761904762 | 0.04761904762 | 0.1111111111 | 0.1111111111 | 0.325       | 0.4285714286 |
| AJAP1   | 0             | 0             | 0.0555555556 | 0.0555555556 | 0           | 0            |
| AJM1    | 0.1428571429  | 0.1428571429  | 0.0555555556 | 0.0555555556 | 2.333333333 | 2.571428571  |
| AJUBA   | 0             | 0             | 0.0555555556 | 0.0555555556 | 0           | 0            |
| AK1     | 0.09523809524 | 0.09523809524 | 0.0555555556 | 0.0555555556 | 1.473684211 | 1.714285714  |
| AK2     | 0.04761904762 | 0.04761904762 | 0.0555555556 | 0.0555555556 | 0.7         | 0.8571428571 |
| AK3     | 0.04761904762 | 0.04761904762 | 0.0555555556 | 0.0555555556 | 0.7         | 0.8571428571 |
| AK4     | 0.04761904762 | 0.04761904762 | 0.0555555556 | 0.0555555556 | 0.7         | 0.8571428571 |
| AK5     | 0.04761904762 | 0.04761904762 | 0.0555555556 | 0.0555555556 | 0.7         | 0.8571428571 |
| AK6     | 0.04761904762 | 0.04761904762 | 0.0555555556 | 0.0555555556 | 0.7         | 0.8571428571 |
| AK8     | 0.04761904762 | 0.04761904762 | 0            | 0            | inf         | 4.7619E+31   |
| AK9     | 0             | 0             | 0            | 0            |             | 0.00001      |
| AKAIN1  | 0.09523809524 | 0.09523809524 | 0            | 0            | inf         | 9.52381E+31  |
| AKAP1   | 0.09523809524 | 0.09523809524 | 0            | 0            | inf         | 9.52381E+31  |
| AKAP10  | 0.09523809524 | 0.09523809524 | 0.0555555556 | 0.0555555556 | 1.473684211 | 1.714285714  |
| AKAP13  | 0.09523809524 | 0.09523809524 | 0.0555555556 | 0.0555555556 | 1.473684211 | 1.714285714  |
| AKAP2   | 0.04761904762 | 0.04761904762 | 0.0555555556 | 0.0555555556 | 0.7         | 0.8571428571 |
| AKAP3   | 0.04761904762 | 0.04761904762 | 0.1111111111 | 0.1111111111 | 0.325       | 0.4285714286 |
| AKAP5   | 0.09523809524 | 0.09523809524 | 0            | 0            | inf         | 9.52381E+31  |
| AKAP8   | 0.1428571429  | 0.1428571429  | 0.1111111111 | 0.1111111111 | 1.083333333 | 1.285714286  |
| AKAP8L  | 0.1428571429  | 0.1428571429  | 0.1111111111 | 0.1111111111 | 1.083333333 | 1.285714286  |
| AKAP9   | 0.04761904762 | 0.04761904762 | 0.1111111111 | 0.1111111111 | 0.325       | 0.4285714286 |
| AKIRIN  | 0.04761904762 | 0.04761904762 | 0.0555555556 | 0.0555555556 | 0.7         | 0.8571428571 |
| AKNA    | 0.04761904762 | 0.04761904762 | 0.0555555556 | 0.0555555556 | 0.7         | 0.8571428571 |
| AKNAD1  | 0.04761904762 | 0.04761904762 | 0.0555555556 | 0.0555555556 | 0.7         | 0.8571428571 |
| AKR1A1  | 0.04761904762 | 0.04761904762 | 0.0555555556 | 0.0555555556 | 0.7         | 0.8571428571 |
| AKR1B1  | 0.04761904762 | 0.04761904762 | 0.0555555556 | 0.0555555556 | 0.7         | 0.8571428571 |
| AKR1B10 | 0.04761904762 | 0.04761904762 | 0.0555555556 | 0.0555555556 | 0.7         | 0.8571428571 |
| AKR1B11 | 0.04761904762 | 0.04761904762 | 0.0555555556 | 0.0555555556 | 0.7         | 0.8571428571 |
| AKR1C1  | 0             | 0             | 0.1666666667 | 0.1666666667 | 0           | 0            |
| AKR1C2  | 0             | 0             | 0.1666666667 | 0.1666666667 | 0           | 0            |
| AKR1C3  | 0             | 0             | 0.1666666667 | 0.1666666667 | 0           | 0            |
| AKR1C4  | 0             | 0             | 0.1666666667 | 0.1666666667 | 0           | 0            |
| KR1C6   | 0.04761904762 | 0.04761904762 | 0.1666666667 | 0.1666666667 | 0.2         | 0.2857142857 |
| KR1C8   | 0             | 0             | 0.1666666667 | 0.1666666667 | 0           | 0            |
| AKR1D1  | 0.04761904762 | 0.04761904762 | 0.0555555556 | 0.0555555556 | 0.7         | 0.8571428571 |
| AKR1E2  | 0.04761904762 | 0.04761904762 | 0.1666666667 | 0.1666666667 | 0.2         | 0.2857142857 |
| AKR7A2  | 0.04761904762 | 0.04761904762 | 0.1111111111 | 0.1111111111 | 0.325       | 0.4285714286 |
| KR7A21  | 0.04761904762 | 0.04761904762 | 0.0555555556 | 0.0555555556 | 0.7         | 0.8571428571 |
| AKR7A3  | 0.04761904762 | 0.04761904762 | 0.1111111111 | 0.1111111111 | 0.325       | 0.4285714286 |

|         |               |               |               |               |              |              |
|---------|---------------|---------------|---------------|---------------|--------------|--------------|
| AKR7L   | 0.04761904762 | 0.04761904762 | 0.1111111111  | 0.1111111111  | 0.325        | 0.4285714286 |
| AKT1S1  | 0.09523809524 | 0.09523809524 | 0.1111111111  | 0.1111111111  | 0.6842105263 | 0.8571428571 |
| AKT2    | 0.04761904762 | 0.04761904762 | 0.05555555556 | 0.05555555556 | 0.7          | 0.8571428571 |
| AKT3    | 0.1428571429  | 0.1428571429  | 0.05555555556 | 0.05555555556 | 2.333333333  | 2.571428571  |
| AKTIP   | 0.04761904762 | 0.04761904762 | 0.05555555556 | 0.05555555556 | 0.7          | 0.8571428571 |
| ALAD    | 0.04761904762 | 0.04761904762 | 0.05555555556 | 0.05555555556 | 0.7          | 0.8571428571 |
| ALAS1   | 0.04761904762 | 0.04761904762 | 0             | 0             | inf          | 4.7619E+31   |
| ALB     | 0.09523809524 | 0.09523809524 | 0.05555555556 | 0.05555555556 | 1.473684211  | 1.714285714  |
| ALCAM   | 0.09523809524 | 0.09523809524 | 0.05555555556 | 0.05555555556 | 1.473684211  | 1.714285714  |
| LDH16A  | 0.09523809524 | 0.09523809524 | 0.1111111111  | 0.1111111111  | 0.6842105263 | 0.8571428571 |
| LDH18A  | 0.1428571429  | 0.1428571429  | 0             | 0             | inf          | 1.42857E+32  |
| LDH1A   | 0             | 0             | 0.05555555556 | 0.05555555556 | 0            | 0            |
| LDH1A   | 0.04761904762 | 0.04761904762 | 0.05555555556 | 0.05555555556 | 0.7          | 0.8571428571 |
| LDH1A   | 0.04761904762 | 0.04761904762 | 0.05555555556 | 0.05555555556 | 0.7          | 0.8571428571 |
| LDH1B   | 0.04761904762 | 0.04761904762 | 0.05555555556 | 0.05555555556 | 0.7          | 0.8571428571 |
| LDH1L   | 0.04761904762 | 0.04761904762 | 0.05555555556 | 0.05555555556 | 0.7          | 0.8571428571 |
| DH1L1-A | 0.04761904762 | 0.04761904762 | 0.05555555556 | 0.05555555556 | 0.7          | 0.8571428571 |
| DH1L1-A | 0.04761904762 | 0.04761904762 | 0.05555555556 | 0.05555555556 | 0.7          | 0.8571428571 |
| LDH1L   | 0.04761904762 | 0.04761904762 | 0.05555555556 | 0.05555555556 | 0.7          | 0.8571428571 |
| ALDH2   | 0             | 0             | 0.1111111111  | 0.1111111111  | 0            | 0            |
| LDH3A   | 0.09523809524 | 0.09523809524 | 0.05555555556 | 0.05555555556 | 1.473684211  | 1.714285714  |
| LDH3A   | 0.09523809524 | 0.09523809524 | 0.05555555556 | 0.05555555556 | 1.473684211  | 1.714285714  |
| LDH4A   | 0.04761904762 | 0.04761904762 | 0.1111111111  | 0.1111111111  | 0.325        | 0.4285714286 |
| LDH5A   | 0             | 0             | 0.05555555556 | 0.05555555556 | 0            | 0            |
| LDH6A   | 0.09523809524 | 0.09523809524 | 0             | 0             | inf          | 9.52381E+31  |
| LDH7A   | 0.04761904762 | 0.04761904762 | 0             | 0             | inf          | 4.7619E+31   |
| LDH9A   | 0.1428571429  | 0.1428571429  | 0             | 0             | inf          | 1.42857E+32  |
| ALDOA   | 0.04761904762 | 0.04761904762 | 0             | 0             | inf          | 4.7619E+31   |
| ALDOB   | 0.04761904762 | 0.04761904762 | 0             | 0             | inf          | 4.7619E+31   |
| ALDOC   | 0.04761904762 | 0.04761904762 | 0.05555555556 | 0.05555555556 | 0.7          | 0.8571428571 |
| ALG1    | 0.04761904762 | 0.04761904762 | 0             | 0             | inf          | 4.7619E+31   |
| ALG10   | 0.04761904762 | 0.04761904762 | 0.05555555556 | 0.05555555556 | 0.7          | 0.8571428571 |
| ALG10B  | 0.04761904762 | 0.04761904762 | 0             | 0             | inf          | 4.7619E+31   |
| ALG12   | 0             | 0             | 0.1111111111  | 0.1111111111  | 0            | 0            |
| ALG14   | 0.04761904762 | 0.04761904762 | 0.05555555556 | 0.05555555556 | 0.7          | 0.8571428571 |
| ALG1L   | 0.04761904762 | 0.04761904762 | 0.05555555556 | 0.05555555556 | 0.7          | 0.8571428571 |
| ALG1L2  | 0.09523809524 | 0.09523809524 | 0.05555555556 | 0.05555555556 | 1.473684211  | 1.714285714  |
| ALG2    | 0.04761904762 | 0.04761904762 | 0             | 0             | inf          | 4.7619E+31   |
| ALG3    | 0.1428571429  | 0.1428571429  | 0.05555555556 | 0.05555555556 | 2.333333333  | 2.571428571  |
| ALG6    | 0.04761904762 | 0.04761904762 | 0.05555555556 | 0.05555555556 | 0.7          | 0.8571428571 |
| ALK     | 0             | 0             | 0.05555555556 | 0.05555555556 | 0            | 0            |
| ALKAL1  | 0.09523809524 | 0.09523809524 | 0.1111111111  | 0.1111111111  | 0.6842105263 | 0.8571428571 |
| ALKAL2  | 0             | 0             | 0.05555555556 | 0.05555555556 | 0            | 0            |
| ALKBH2  | 0             | 0             | 0.05555555556 | 0.05555555556 | 0            | 0            |
| ALKBH4  | 0.04761904762 | 0.04761904762 | 0.05555555556 | 0.05555555556 | 0.7          | 0.8571428571 |
| ALKBH6  | 0.04761904762 | 0.04761904762 | 0.05555555556 | 0.05555555556 | 0.7          | 0.8571428571 |
| ALKBH7  | 0.1428571429  | 0.1428571429  | 0.05555555556 | 0.05555555556 | 2.333333333  | 2.571428571  |
| ALLC    | 0             | 0             | 0.05555555556 | 0.05555555556 | 0            | 0            |
| ALMS1   | 0             | 0             | 0.05555555556 | 0.05555555556 | 0            | 0            |
| LMS1-IT | 0             | 0             | 0.05555555556 | 0.05555555556 | 0            | 0            |
| LMS1P   | 0             | 0             | 0.05555555556 | 0.05555555556 | 0            | 0            |

|          |               |               |               |               |              |              |
|----------|---------------|---------------|---------------|---------------|--------------|--------------|
| ALOX12   | 0             | 0             | 0.05555555556 | 0.05555555556 | 0            | 0            |
| ALOX12-A | 0             | 0             | 0.05555555556 | 0.05555555556 | 0            | 0            |
| ALOX12B  | 0             | 0             | 0.05555555556 | 0.05555555556 | 0            | 0            |
| ALOX12F  | 0             | 0             | 0.05555555556 | 0.05555555556 | 0            | 0            |
| ALOX15   | 0             | 0             | 0.11111111111 | 0.11111111111 | 0            | 0            |
| ALOX15A  | 0             | 0             | 0.05555555556 | 0.05555555556 | 0            | 0            |
| ALOX15F  | 0             | 0             | 0.05555555556 | 0.05555555556 | 0            | 0            |
| ALOX5    | 0.1428571429  | 0.1428571429  | 0.05555555556 | 0.05555555556 | 2.333333333  | 2.571428571  |
| ALOXE3   | 0             | 0             | 0.05555555556 | 0.05555555556 | 0            | 0            |
| ALPG     | 0             | 0             | 0.05555555556 | 0.05555555556 | 0            | 0            |
| ALPI     | 0             | 0             | 0.05555555556 | 0.05555555556 | 0            | 0            |
| ALPK1    | 0             | 0             | 0.05555555556 | 0.05555555556 | 0            | 0            |
| ALPK2    | 0.09523809524 | 0.09523809524 | 0             | 0             | inf          | 9.52381E+31  |
| ALPK3    | 0.04761904762 | 0.04761904762 | 0.05555555556 | 0.05555555556 | 0.7          | 0.8571428571 |
| ALPL     | 0.04761904762 | 0.04761904762 | 0.11111111111 | 0.11111111111 | 0.325        | 0.4285714286 |
| ALPP     | 0             | 0             | 0.05555555556 | 0.05555555556 | 0            | 0            |
| ALS2     | 0             | 0             | 0.05555555556 | 0.05555555556 | 0            | 0            |
| ALX1     | 0.04761904762 | 0.04761904762 | 0.05555555556 | 0.05555555556 | 0.7          | 0.8571428571 |
| ALX3     | 0.04761904762 | 0.04761904762 | 0.05555555556 | 0.05555555556 | 0.7          | 0.8571428571 |
| ALYREI   | 0.04761904762 | 0.04761904762 | 0             | 0             | inf          | 4.7619E+31   |
| AMACR    | 0.04761904762 | 0.04761904762 | 0.11111111111 | 0.11111111111 | 0.325        | 0.4285714286 |
| AMBN     | 0.09523809524 | 0.09523809524 | 0.05555555556 | 0.05555555556 | 1.473684211  | 1.714285714  |
| AMBP     | 0.04761904762 | 0.04761904762 | 0.05555555556 | 0.05555555556 | 0.7          | 0.8571428571 |
| AMBRA    | 0             | 0             | 0.05555555556 | 0.05555555556 | 0            | 0            |
| AMD1     | 0             | 0             | 0             | 0             |              | 0.00001      |
| AMDHD    | 0.04761904762 | 0.04761904762 | 0.05555555556 | 0.05555555556 | 0.7          | 0.8571428571 |
| AMDHD0   | 0.04761904762 | 0.04761904762 | 0.11111111111 | 0.11111111111 | 0.325        | 0.4285714286 |
| AMER3    | 0             | 0             | 0.05555555556 | 0.05555555556 | 0            | 0            |
| AMFR     | 0.04761904762 | 0.04761904762 | 0             | 0             | inf          | 4.7619E+31   |
| AMH      | 0.09523809524 | 0.09523809524 | 0.11111111111 | 0.11111111111 | 0.6842105263 | 0.8571428571 |
| AMHR2    | 0.04761904762 | 0.04761904762 | 0.05555555556 | 0.05555555556 | 0.7          | 0.8571428571 |
| AMIGO1   | 0.04761904762 | 0.04761904762 | 0.05555555556 | 0.05555555556 | 0.7          | 0.8571428571 |
| AMIGO2   | 0.04761904762 | 0.04761904762 | 0.05555555556 | 0.05555555556 | 0.7          | 0.8571428571 |
| AMIGO3   | 0.09523809524 | 0.09523809524 | 0             | 0             | inf          | 9.52381E+31  |
| IMECR    | 0             | 0             | 0.05555555556 | 0.05555555556 | 0            | 0            |
| AMN1     | 0.1428571429  | 0.1428571429  | 0.11111111111 | 0.11111111111 | 1.083333333  | 1.285714286  |
| MOTL2    | 0.1428571429  | 0.1428571429  | 0.05555555556 | 0.05555555556 | 2.333333333  | 2.571428571  |
| AMPD1    | 0.04761904762 | 0.04761904762 | 0.05555555556 | 0.05555555556 | 0.7          | 0.8571428571 |
| AMPD2    | 0.04761904762 | 0.04761904762 | 0.05555555556 | 0.05555555556 | 0.7          | 0.8571428571 |
| AMPH     | 0.04761904762 | 0.04761904762 | 0.22222222222 | 0.22222222222 | 0.1375       | 0.2142857143 |
| AMT      | 0.1428571429  | 0.1428571429  | 0             | 0             | inf          | 1.42857E+32  |
| AMTN     | 0.04761904762 | 0.04761904762 | 0.05555555556 | 0.05555555556 | 0.7          | 0.8571428571 |
| AMY1A    | 0.04761904762 | 0.04761904762 | 0.05555555556 | 0.05555555556 | 0.7          | 0.8571428571 |
| AMY1B    | 0.04761904762 | 0.04761904762 | 0.05555555556 | 0.05555555556 | 0.7          | 0.8571428571 |
| AMY1C    | 0.04761904762 | 0.04761904762 | 0.05555555556 | 0.05555555556 | 0.7          | 0.8571428571 |
| AMY2A    | 0.04761904762 | 0.04761904762 | 0.05555555556 | 0.05555555556 | 0.7          | 0.8571428571 |
| AMY2B    | 0.04761904762 | 0.04761904762 | 0.05555555556 | 0.05555555556 | 0.7          | 0.8571428571 |
| AMZ1     | 0.04761904762 | 0.04761904762 | 0.16666666667 | 0.16666666667 | 0.2          | 0.2857142857 |
| AMZ2     | 0             | 0             | 0             | 0             |              | 0.00001      |
| AMZ2P1   | 0.04761904762 | 0.04761904762 | 0             | 0             | inf          | 4.7619E+31   |
| ANAPC1   | 0             | 0             | 0.05555555556 | 0.05555555556 | 0            | 0            |

|         |               |               |               |               |              |              |
|---------|---------------|---------------|---------------|---------------|--------------|--------------|
| NAPC1   | 0             | 0             | 0.05555555556 | 0.05555555556 | 0            | 0            |
| NAPC1   | 0.04761904762 | 0.04761904762 | 0             | 0             | inf          | 4.7619E+31   |
| NAPC1   | 0.1428571429  | 0.1428571429  | 0.05555555556 | 0.05555555556 | 2.333333333  | 2.571428571  |
| NAPC1   | 0.1904761905  | 0.1904761905  | 0.05555555556 | 0.05555555556 | 3.294117647  | 3.428571429  |
| NAPC1E  | 0             | 0             | 0.05555555556 | 0.05555555556 | 0            | 0            |
| ANAPC2  | 0.1428571429  | 0.1428571429  | 0.05555555556 | 0.05555555556 | 2.333333333  | 2.571428571  |
| ANAPC5  | 0.04761904762 | 0.04761904762 | 0.1111111111  | 0.1111111111  | 0.325        | 0.4285714286 |
| ANAPC7  | 0             | 0             | 0.1111111111  | 0.1111111111  | 0            | 0            |
| ANGEL2  | 0.1428571429  | 0.1428571429  | 0             | 0             | inf          | 1.42857E+32  |
| ANGPT1  | 0.1904761905  | 0.1904761905  | 0.1111111111  | 0.1111111111  | 1.529411765  | 1.714285714  |
| ANGPT2  | 0.09523809524 | 0.09523809524 | 0.1111111111  | 0.1111111111  | 0.6842105263 | 0.8571428571 |
| ANGPT4  | 0.1904761905  | 0.1904761905  | 0.1111111111  | 0.1111111111  | 1.529411765  | 1.714285714  |
| NGPTL   | 0.1428571429  | 0.1428571429  | 0             | 0             | inf          | 1.42857E+32  |
| NGPTL   | 0.09523809524 | 0.09523809524 | 0.05555555556 | 0.05555555556 | 1.473684211  | 1.714285714  |
| NGPTL   | 0.04761904762 | 0.04761904762 | 0.05555555556 | 0.05555555556 | 0.7          | 0.8571428571 |
| NGPTL   | 0.1428571429  | 0.1428571429  | 0.05555555556 | 0.05555555556 | 2.333333333  | 2.571428571  |
| NGPTL   | 0.1428571429  | 0.1428571429  | 0.1111111111  | 0.1111111111  | 1.083333333  | 1.285714286  |
| NGPTL   | 0.04761904762 | 0.04761904762 | 0.1111111111  | 0.1111111111  | 0.325        | 0.4285714286 |
| NGPTL   | 0.1428571429  | 0.1428571429  | 0.1111111111  | 0.1111111111  | 1.083333333  | 1.285714286  |
| ANH     | 0.09523809524 | 0.09523809524 | 0.05555555556 | 0.05555555556 | 1.473684211  | 1.714285714  |
| ANK1    | 0.09523809524 | 0.09523809524 | 0.1666666667  | 0.1666666667  | 0.4210526316 | 0.5714285714 |
| ANK2    | 0             | 0             | 0.05555555556 | 0.05555555556 | 0            | 0            |
| ANK3    | 0.04761904762 | 0.04761904762 | 0.1111111111  | 0.1111111111  | 0.325        | 0.4285714286 |
| ANKAR   | 0             | 0             | 0.05555555556 | 0.05555555556 | 0            | 0            |
| NKDD1   | 0.04761904762 | 0.04761904762 | 0.05555555556 | 0.05555555556 | 0.7          | 0.8571428571 |
| NKDD1   | 0.04761904762 | 0.04761904762 | 0             | 0             | inf          | 4.7619E+31   |
| ANKEF1  | 0.1904761905  | 0.1904761905  | 0.1111111111  | 0.1111111111  | 1.529411765  | 1.714285714  |
| ANKFN1  | 0.09523809524 | 0.09523809524 | 0             | 0             | inf          | 9.52381E+31  |
| ANKFY1  | 0             | 0             | 0.1111111111  | 0.1111111111  | 0            | 0            |
| ANKH    | 0.04761904762 | 0.04761904762 | 0.05555555556 | 0.05555555556 | 0.7          | 0.8571428571 |
| ANKHD   | 0.04761904762 | 0.04761904762 | 0             | 0             | inf          | 4.7619E+31   |
| DI-EIF4 | 0.04761904762 | 0.04761904762 | 0             | 0             | inf          | 4.7619E+31   |
| ANKIB1  | 0.04761904762 | 0.04761904762 | 0.1111111111  | 0.1111111111  | 0.325        | 0.4285714286 |
| ANKLE1  | 0.1428571429  | 0.1428571429  | 0.1111111111  | 0.1111111111  | 1.083333333  | 1.285714286  |
| ANKLE2  | 0.09523809524 | 0.09523809524 | 0.05555555556 | 0.05555555556 | 1.473684211  | 1.714285714  |
| ANKMY   | 0.04761904762 | 0.04761904762 | 0.05555555556 | 0.05555555556 | 0.7          | 0.8571428571 |
| ANKMY   | 0.04761904762 | 0.04761904762 | 0.2222222222  | 0.2222222222  | 0.1375       | 0.2142857143 |
| ANKRA2  | 0             | 0             | 0.05555555556 | 0.05555555556 | 0            | 0            |
| ANKRD1  | 0.1428571429  | 0.1428571429  | 0.1111111111  | 0.1111111111  | 1.083333333  | 1.285714286  |
| ANKRD1  | 0.09523809524 | 0.09523809524 | 0             | 0             | inf          | 9.52381E+31  |
| ANKRD1  | 0.09523809524 | 0.09523809524 | 0             | 0             | inf          | 9.52381E+31  |
| NKRD13  | 0             | 0             | 0.1111111111  | 0.1111111111  | 0            | 0            |
| NKRD13  | 0             | 0             | 0.05555555556 | 0.05555555556 | 0            | 0            |
| NKRD13  | 0.04761904762 | 0.04761904762 | 0.05555555556 | 0.05555555556 | 0.7          | 0.8571428571 |
| ANKRD1  | 0.09523809524 | 0.09523809524 | 0.1111111111  | 0.1111111111  | 0.6842105263 | 0.8571428571 |
| ANKRD1  | 0.1428571429  | 0.1428571429  | 0.05555555556 | 0.05555555556 | 2.333333333  | 2.571428571  |
| ANKRD18 | 0.04761904762 | 0.04761904762 | 0.05555555556 | 0.05555555556 | 0.7          | 0.8571428571 |
| ANKRD18 | 0.09523809524 | 0.09523809524 | 0.05555555556 | 0.05555555556 | 1.473684211  | 1.714285714  |
| ANKRD18 | 0.04761904762 | 0.04761904762 | 0             | 0             | inf          | 4.7619E+31   |
| ANKRD18 | 0.1428571429  | 0.1428571429  | 0.05555555556 | 0.05555555556 | 2.333333333  | 2.571428571  |
| ANKRD19 | 0.04761904762 | 0.04761904762 | 0.05555555556 | 0.05555555556 | 0.7          | 0.8571428571 |

|        |               |               |               |               |              |              |
|--------|---------------|---------------|---------------|---------------|--------------|--------------|
| ANKRD2 | 0.1428571429  | 0.1428571429  | 0             | 0             | inf          | 1.42857E+32  |
| NKRD20 | 0.1904761905  | 0.1904761905  | 0.2222222222  | 0.2222222222  | 0.6470588235 | 0.8571428571 |
| KRD20A | 0.04761904762 | 0.04761904762 | 0             | 0             | inf          | 4.7619E+31   |
| KRD20A | 0.09523809524 | 0.09523809524 | 0.05555555556 | 0.05555555556 | 1.473684211  | 1.714285714  |
| NKRD20 | 0.1904761905  | 0.1904761905  | 0.05555555556 | 0.05555555556 | 3.294117647  | 3.428571429  |
| NKRD20 | 0.1904761905  | 0.1904761905  | 0.2222222222  | 0.2222222222  | 0.6470588235 | 0.8571428571 |
| NKRD20 | 0.09523809524 | 0.09523809524 | 0.2222222222  | 0.2222222222  | 0.2894736842 | 0.4285714286 |
| A4-ANK | 0.09523809524 | 0.09523809524 | 0.2222222222  | 0.2222222222  | 0.2894736842 | 0.4285714286 |
| KRD20A | 0.09523809524 | 0.09523809524 | 0.05555555556 | 0.05555555556 | 1.473684211  | 1.714285714  |
| KRD20A | 0             | 0             | 0.1111111111  | 0.1111111111  | 0            | 0            |
| KRD20A | 0.04761904762 | 0.04761904762 | 0             | 0             | inf          | 4.7619E+31   |
| NKRD2  | 0.1428571429  | 0.1428571429  | 0.1666666667  | 0.1666666667  | 0.6666666667 | 0.8571428571 |
| NKRD2  | 0             | 0             | 0.1111111111  | 0.1111111111  | 0            | 0            |
| NKRD2  | 0.09523809524 | 0.09523809524 | 0.05555555556 | 0.05555555556 | 1.473684211  | 1.714285714  |
| NKRD2  | 0.09523809524 | 0.09523809524 | 0.1111111111  | 0.1111111111  | 0.6842105263 | 0.8571428571 |
| NKRD26 | 0.04761904762 | 0.04761904762 | 0             | 0             | inf          | 4.7619E+31   |
| NKRD26 | 0.04761904762 | 0.04761904762 | 0             | 0             | inf          | 4.7619E+31   |
| NKRD2  | 0.04761904762 | 0.04761904762 | 0.05555555556 | 0.05555555556 | 0.7          | 0.8571428571 |
| NKRD2  | 0.04761904762 | 0.04761904762 | 0             | 0             | inf          | 4.7619E+31   |
| NKRD2  | 0.09523809524 | 0.09523809524 | 0.05555555556 | 0.05555555556 | 1.473684211  | 1.714285714  |
| NKRD30 | 0.09523809524 | 0.09523809524 | 0.1111111111  | 0.1111111111  | 0.6842105263 | 0.8571428571 |
| NKRD30 | 0.09523809524 | 0.09523809524 | 0.05555555556 | 0.05555555556 | 1.473684211  | 1.714285714  |
| KRD30  | 0             | 0             | 0.05555555556 | 0.05555555556 | 0            | 0            |
| KRD30  | 0.04761904762 | 0.04761904762 | 0             | 0             | inf          | 4.7619E+31   |
| KRD30  | 0.1428571429  | 0.1428571429  | 0.05555555556 | 0.05555555556 | 2.333333333  | 2.571428571  |
| NKRD3  | 0.04761904762 | 0.04761904762 | 0             | 0             | inf          | 4.7619E+31   |
| NKRD3  | 0.04761904762 | 0.04761904762 | 0.05555555556 | 0.05555555556 | 0.7          | 0.8571428571 |
| NKRD33 | 0.04761904762 | 0.04761904762 | 0.05555555556 | 0.05555555556 | 0.7          | 0.8571428571 |
| NKRD34 | 0.04761904762 | 0.04761904762 | 0             | 0             | inf          | 4.7619E+31   |
| NKRD34 | 0.04761904762 | 0.04761904762 | 0.05555555556 | 0.05555555556 | 0.7          | 0.8571428571 |
| RD34C  | 0.04761904762 | 0.04761904762 | 0.05555555556 | 0.05555555556 | 0.7          | 0.8571428571 |
| NKRD3  | 0.1428571429  | 0.1428571429  | 0.05555555556 | 0.05555555556 | 2.333333333  | 2.571428571  |
| NKRD3  | 0             | 0             | 0.1111111111  | 0.1111111111  | 0            | 0            |
| NKRD36 | 0             | 0             | 0.1111111111  | 0.1111111111  | 0            | 0            |
| KRD36  | 0.1428571429  | 0.1428571429  | 0             | 0             | inf          | 1.42857E+32  |
| KRD36  | 0             | 0             | 0.05555555556 | 0.05555555556 | 0            | 0            |
| NKRD36 | 0             | 0             | 0.1111111111  | 0.1111111111  | 0            | 0            |
| NKRD3  | 0             | 0             | 0.05555555556 | 0.05555555556 | 0            | 0            |
| NKRD3  | 0             | 0             | 0.1111111111  | 0.1111111111  | 0            | 0            |
| NKRD4  | 0.09523809524 | 0.09523809524 | 0             | 0             | inf          | 9.52381E+31  |
| KRD40  | 0.09523809524 | 0.09523809524 | 0             | 0             | inf          | 9.52381E+31  |
| NKRD4  | 0             | 0             | 0.05555555556 | 0.05555555556 | 0            | 0            |
| KRD44- | 0             | 0             | 0.05555555556 | 0.05555555556 | 0            | 0            |
| NKRD4  | 0.1428571429  | 0.1428571429  | 0             | 0             | inf          | 1.42857E+32  |
| NKRD4  | 0.1904761905  | 0.1904761905  | 0.1111111111  | 0.1111111111  | 1.529411765  | 1.714285714  |
| NKRD5  | 0             | 0             | 0.05555555556 | 0.05555555556 | 0            | 0            |
| NKRD5  | 0.09523809524 | 0.09523809524 | 0.05555555556 | 0.05555555556 | 1.473684211  | 1.714285714  |
| NKRD5  | 0             | 0             | 0.05555555556 | 0.05555555556 | 0            | 0            |
| NKRD5  | 0             | 0             | 0.1111111111  | 0.1111111111  | 0            | 0            |
| NKRD5  | 0.04761904762 | 0.04761904762 | 0.05555555556 | 0.05555555556 | 0.7          | 0.8571428571 |
| ANKRD  | 0             | 0             | 0             | 0             |              | 0.00001      |

|          |               |               |              |              |              |              |
|----------|---------------|---------------|--------------|--------------|--------------|--------------|
| NKRD6    | 0.1428571429  | 0.1428571429  | 0.2222222222 | 0.2222222222 | 0.4583333333 | 0.6428571429 |
| NKRD6    | 0.04761904762 | 0.04761904762 | 0.1666666667 | 0.1666666667 | 0.2          | 0.2857142857 |
| NKRD6    | 0.09523809524 | 0.09523809524 | 0.0555555556 | 0.0555555556 | 1.473684211  | 1.714285714  |
| 62P1-P   | 0.04761904762 | 0.04761904762 | 0            | 0            | inf          | 4.7619E+31   |
| NKRD6    | 0             | 0             | 0.1111111111 | 0.1111111111 | 0            | 0            |
| NKRD6    | 0.04761904762 | 0.04761904762 | 0.0555555556 | 0.0555555556 | 0.7          | 0.8571428571 |
| ANKRD7   | 0.09523809524 | 0.09523809524 | 0.0555555556 | 0.0555555556 | 1.473684211  | 1.714285714  |
| ANKS1A   | 0.04761904762 | 0.04761904762 | 0            | 0            | inf          | 4.7619E+31   |
| ANKS1B   | 0.04761904762 | 0.04761904762 | 0.0555555556 | 0.0555555556 | 0.7          | 0.8571428571 |
| ANKS3    | 0.04761904762 | 0.04761904762 | 0            | 0            | inf          | 4.7619E+31   |
| ANKS4B   | 0.04761904762 | 0.04761904762 | 0            | 0            | inf          | 4.7619E+31   |
| ANKS6    | 0.04761904762 | 0.04761904762 | 0            | 0            | inf          | 4.7619E+31   |
| ANKUB1   | 0.1904761905  | 0.1904761905  | 0.1111111111 | 0.1111111111 | 1.529411765  | 1.714285714  |
| ANLN     | 0.04761904762 | 0.04761904762 | 0.2222222222 | 0.2222222222 | 0.1375       | 0.2142857143 |
| ANO10    | 0.04761904762 | 0.04761904762 | 0            | 0            | inf          | 4.7619E+31   |
| ANO2     | 0.04761904762 | 0.04761904762 | 0.1111111111 | 0.1111111111 | 0.325        | 0.4285714286 |
| ANO4     | 0.04761904762 | 0.04761904762 | 0.0555555556 | 0.0555555556 | 0.7          | 0.8571428571 |
| ANO6     | 0.04761904762 | 0.04761904762 | 0.0555555556 | 0.0555555556 | 0.7          | 0.8571428571 |
| ANO7     | 0             | 0             | 0.0555555556 | 0.0555555556 | 0            | 0            |
| ANO8     | 0.1428571429  | 0.1428571429  | 0.1111111111 | 0.1111111111 | 1.083333333  | 1.285714286  |
| ANO9     | 0.04761904762 | 0.04761904762 | 0            | 0            | inf          | 4.7619E+31   |
| ANP32A   | 0.04761904762 | 0.04761904762 | 0.0555555556 | 0.0555555556 | 0.7          | 0.8571428571 |
| NP32A-10 | 0.04761904762 | 0.04761904762 | 0.0555555556 | 0.0555555556 | 0.7          | 0.8571428571 |
| NP32AP   | 0             | 0             | 0            | 0            |              | 0.00001      |
| ANP32B   | 0.04761904762 | 0.04761904762 | 0            | 0            | inf          | 4.7619E+31   |
| ANP32C   | 0             | 0             | 0.0555555556 | 0.0555555556 | 0            | 0            |
| ANP32D   | 0.04761904762 | 0.04761904762 | 0.0555555556 | 0.0555555556 | 0.7          | 0.8571428571 |
| ANP32E   | 0.1904761905  | 0.1904761905  | 0.0555555556 | 0.0555555556 | 3.294117647  | 3.428571429  |
| ANPEP    | 0.04761904762 | 0.04761904762 | 0.0555555556 | 0.0555555556 | 0.7          | 0.8571428571 |
| ANTXR1   | 0             | 0             | 0.0555555556 | 0.0555555556 | 0            | 0            |
| ANTXR2   | 0.04761904762 | 0.04761904762 | 0.0555555556 | 0.0555555556 | 0.7          | 0.8571428571 |
| ANTXR1   | 0.1428571429  | 0.1428571429  | 0.0555555556 | 0.0555555556 | 2.333333333  | 2.571428571  |
| NTXRL1   | 0.1428571429  | 0.1428571429  | 0.0555555556 | 0.0555555556 | 2.333333333  | 2.571428571  |
| ANXA1    | 0             | 0             | 0.0555555556 | 0.0555555556 | 0            | 0            |
| ANXA10   | 0             | 0             | 0.0555555556 | 0.0555555556 | 0            | 0            |
| ANXA11   | 0.1428571429  | 0.1428571429  | 0            | 0            | inf          | 1.42857E+32  |
| ANXA13   | 0.1428571429  | 0.1428571429  | 0.1111111111 | 0.1111111111 | 1.083333333  | 1.285714286  |
| ANXA2    | 0.04761904762 | 0.04761904762 | 0.0555555556 | 0.0555555556 | 0.7          | 0.8571428571 |
| NXA2P    | 0             | 0             | 0.0555555556 | 0.0555555556 | 0            | 0            |
| ANXA2P   | 0.09523809524 | 0.09523809524 | 0.0555555556 | 0.0555555556 | 1.473684211  | 1.714285714  |
| ANXA2P   | 0.1428571429  | 0.1428571429  | 0.0555555556 | 0.0555555556 | 2.333333333  | 2.571428571  |
| ANXA2F   | 0.04761904762 | 0.04761904762 | 0.0555555556 | 0.0555555556 | 0.7          | 0.8571428571 |
| ANXA3    | 0.04761904762 | 0.04761904762 | 0.0555555556 | 0.0555555556 | 0.7          | 0.8571428571 |
| ANXA4    | 0             | 0             | 0.0555555556 | 0.0555555556 | 0            | 0            |
| ANXA5    | 0             | 0             | 0.0555555556 | 0.0555555556 | 0            | 0            |
| ANXA7    | 0.1904761905  | 0.1904761905  | 0.0555555556 | 0.0555555556 | 3.294117647  | 3.428571429  |
| ANXA8    | 0.1428571429  | 0.1428571429  | 0.0555555556 | 0.0555555556 | 2.333333333  | 2.571428571  |
| NXA8L    | 0.1428571429  | 0.1428571429  | 0.0555555556 | 0.0555555556 | 2.333333333  | 2.571428571  |
| ANXA9    | 0.1904761905  | 0.1904761905  | 0.0555555556 | 0.0555555556 | 3.294117647  | 3.428571429  |
| AOAH     | 0.04761904762 | 0.04761904762 | 0.2222222222 | 0.2222222222 | 0.1375       | 0.2142857143 |
| OAH-10   | 0.04761904762 | 0.04761904762 | 0.2222222222 | 0.2222222222 | 0.1375       | 0.2142857143 |

|                |               |               |               |               |              |              |
|----------------|---------------|---------------|---------------|---------------|--------------|--------------|
| <b>AOC1</b>    | 0.09523809524 | 0.09523809524 | 0.05555555556 | 0.05555555556 | 1.473684211  | 1.714285714  |
| <b>AOC2</b>    | 0.04761904762 | 0.04761904762 | 0             | 0             | inf          | 4.7619E+31   |
| <b>AOC3</b>    | 0.04761904762 | 0.04761904762 | 0             | 0             | inf          | 4.7619E+31   |
| <b>AOC4P</b>   | 0.04761904762 | 0.04761904762 | 0             | 0             | inf          | 4.7619E+31   |
| <b>AOPEP</b>   | 0.04761904762 | 0.04761904762 | 0.05555555556 | 0.05555555556 | 0.7          | 0.8571428571 |
| <b>AOX1</b>    | 0             | 0             | 0.05555555556 | 0.05555555556 | 0            | 0            |
| <b>K3P-AO</b>  | 0             | 0             | 0.05555555556 | 0.05555555556 | 0            | 0            |
| <b>AP1AR</b>   | 0             | 0             | 0.05555555556 | 0.05555555556 | 0            | 0            |
| <b>AP1B1</b>   | 0.04761904762 | 0.04761904762 | 0.11111111111 | 0.11111111111 | 0.325        | 0.4285714286 |
| <b>AP1B1P</b>  | 0.04761904762 | 0.04761904762 | 0.11111111111 | 0.11111111111 | 0.325        | 0.4285714286 |
| <b>AP1G1</b>   | 0.04761904762 | 0.04761904762 | 0             | 0             | inf          | 4.7619E+31   |
| <b>AP1M1</b>   | 0.1428571429  | 0.1428571429  | 0.11111111111 | 0.11111111111 | 1.083333333  | 1.285714286  |
| <b>AP1M2</b>   | 0.1428571429  | 0.1428571429  | 0.11111111111 | 0.11111111111 | 1.083333333  | 1.285714286  |
| <b>AP1S1</b>   | 0.04761904762 | 0.04761904762 | 0.05555555556 | 0.05555555556 | 0.7          | 0.8571428571 |
| <b>AP1S3</b>   | 0             | 0             | 0.05555555556 | 0.05555555556 | 0            | 0            |
| <b>AP2A1</b>   | 0.09523809524 | 0.09523809524 | 0.11111111111 | 0.11111111111 | 0.6842105263 | 0.8571428571 |
| <b>AP2A2</b>   | 0.04761904762 | 0.04761904762 | 0             | 0             | inf          | 4.7619E+31   |
| <b>AP2B1</b>   | 0.09523809524 | 0.09523809524 | 0             | 0             | inf          | 9.52381E+31  |
| <b>AP2M1</b>   | 0.1428571429  | 0.1428571429  | 0.05555555556 | 0.05555555556 | 2.333333333  | 2.571428571  |
| <b>AP2S1</b>   | 0.09523809524 | 0.09523809524 | 0.11111111111 | 0.11111111111 | 0.6842105263 | 0.8571428571 |
| <b>AP3B1</b>   | 0.04761904762 | 0.04761904762 | 0             | 0             | inf          | 4.7619E+31   |
| <b>AP3B2</b>   | 0.04761904762 | 0.04761904762 | 0.05555555556 | 0.05555555556 | 0.7          | 0.8571428571 |
| <b>AP3D1</b>   | 0.09523809524 | 0.09523809524 | 0.11111111111 | 0.11111111111 | 0.6842105263 | 0.8571428571 |
| <b>AP3M1</b>   | 0.1904761905  | 0.1904761905  | 0.05555555556 | 0.05555555556 | 3.294117647  | 3.428571429  |
| <b>AP3M2</b>   | 0.09523809524 | 0.09523809524 | 0.16666666667 | 0.16666666667 | 0.4210526316 | 0.5714285714 |
| <b>AP3S1</b>   | 0.04761904762 | 0.04761904762 | 0             | 0             | inf          | 4.7619E+31   |
| <b>AP3S2</b>   | 0.04761904762 | 0.04761904762 | 0.05555555556 | 0.05555555556 | 0.7          | 0.8571428571 |
| <b>AP4B1</b>   | 0.04761904762 | 0.04761904762 | 0.05555555556 | 0.05555555556 | 0.7          | 0.8571428571 |
| <b>P4B1-AS</b> | 0.04761904762 | 0.04761904762 | 0.05555555556 | 0.05555555556 | 0.7          | 0.8571428571 |
| <b>AP4E1</b>   | 0.1428571429  | 0.1428571429  | 0.05555555556 | 0.05555555556 | 2.333333333  | 2.571428571  |
| <b>AP4M1</b>   | 0.04761904762 | 0.04761904762 | 0.05555555556 | 0.05555555556 | 0.7          | 0.8571428571 |
| <b>AP4S1</b>   | 0             | 0             | 0             | 0             |              | 0.00001      |
| <b>AP5M1</b>   | 0.04761904762 | 0.04761904762 | 0             | 0             | inf          | 4.7619E+31   |
| <b>AP5S1</b>   | 0.1904761905  | 0.1904761905  | 0.05555555556 | 0.05555555556 | 3.294117647  | 3.428571429  |
| <b>AP5Z1</b>   | 0.04761904762 | 0.04761904762 | 0.16666666667 | 0.16666666667 | 0.2          | 0.2857142857 |
| <b>APAF1</b>   | 0.04761904762 | 0.04761904762 | 0.05555555556 | 0.05555555556 | 0.7          | 0.8571428571 |
| <b>APBA1</b>   | 0             | 0             | 0.05555555556 | 0.05555555556 | 0            | 0            |
| <b>APBA3</b>   | 0.09523809524 | 0.09523809524 | 0.05555555556 | 0.05555555556 | 1.473684211  | 1.714285714  |
| <b>APBB1</b>   | 0.04761904762 | 0.04761904762 | 0             | 0             | inf          | 4.7619E+31   |
| <b>APBB1H</b>  | 0.09523809524 | 0.09523809524 | 0.11111111111 | 0.11111111111 | 0.6842105263 | 0.8571428571 |
| <b>APBB2</b>   | 0.1904761905  | 0.1904761905  | 0.05555555556 | 0.05555555556 | 3.294117647  | 3.428571429  |
| <b>APBB3</b>   | 0.04761904762 | 0.04761904762 | 0             | 0             | inf          | 4.7619E+31   |
| <b>APC</b>     | 0.04761904762 | 0.04761904762 | 0             | 0             | inf          | 4.7619E+31   |
| <b>APC2</b>    | 0.09523809524 | 0.09523809524 | 0.11111111111 | 0.11111111111 | 0.6842105263 | 0.8571428571 |
| <b>APCDD1</b>  | 0.09523809524 | 0.09523809524 | 0.05555555556 | 0.05555555556 | 1.473684211  | 1.714285714  |
| <b>PCDD1</b>   | 0.1428571429  | 0.1428571429  | 0.22222222222 | 0.22222222222 | 0.4583333333 | 0.6428571429 |
| <b>CDD1L</b>   | 0.1428571429  | 0.1428571429  | 0.22222222222 | 0.22222222222 | 0.4583333333 | 0.6428571429 |
| <b>APCS</b>    | 0.1428571429  | 0.1428571429  | 0             | 0             | inf          | 1.42857E+32  |
| <b>APEH</b>    | 0.09523809524 | 0.09523809524 | 0             | 0             | inf          | 9.52381E+31  |
| <b>APELA</b>   | 0.04761904762 | 0.04761904762 | 0.05555555556 | 0.05555555556 | 0.7          | 0.8571428571 |
| <b>APH1A</b>   | 0.1904761905  | 0.1904761905  | 0.05555555556 | 0.05555555556 | 3.294117647  | 3.428571429  |



|         |               |               |               |               |              |              |
|---------|---------------|---------------|---------------|---------------|--------------|--------------|
| APH1B   | 0.04761904762 | 0.04761904762 | 0.05555555556 | 0.05555555556 | 0.7          | 0.8571428571 |
| APLF    | 0             | 0             | 0.05555555556 | 0.05555555556 | 0            | 0            |
| APLP1   | 0.04761904762 | 0.04761904762 | 0.05555555556 | 0.05555555556 | 0.7          | 0.8571428571 |
| APMAP   | 0.1904761905  | 0.1904761905  | 0.05555555556 | 0.05555555556 | 3.294117647  | 3.428571429  |
| APOA2   | 0.1428571429  | 0.1428571429  | 0             | 0             | inf          | 1.42857E+32  |
| APOB    | 0             | 0             | 0.05555555556 | 0.05555555556 | 0            | 0            |
| POBEC   | 0.04761904762 | 0.04761904762 | 0.11111111111 | 0.11111111111 | 0.325        | 0.4285714286 |
| POBEC   | 0             | 0             | 0.05555555556 | 0.05555555556 | 0            | 0            |
| POBEC3  | 0.04761904762 | 0.04761904762 | 0.11111111111 | 0.11111111111 | 0.325        | 0.4285714286 |
| OBEC3A  | 0.04761904762 | 0.04761904762 | 0.11111111111 | 0.11111111111 | 0.325        | 0.4285714286 |
| POBEC3  | 0.04761904762 | 0.04761904762 | 0.11111111111 | 0.11111111111 | 0.325        | 0.4285714286 |
| OBEC3B  | 0.04761904762 | 0.04761904762 | 0.11111111111 | 0.11111111111 | 0.325        | 0.4285714286 |
| POBEC3  | 0.04761904762 | 0.04761904762 | 0.11111111111 | 0.11111111111 | 0.325        | 0.4285714286 |
| POBEC3  | 0.04761904762 | 0.04761904762 | 0.11111111111 | 0.11111111111 | 0.325        | 0.4285714286 |
| POBEC3  | 0.04761904762 | 0.04761904762 | 0.11111111111 | 0.11111111111 | 0.325        | 0.4285714286 |
| POBEC3  | 0.04761904762 | 0.04761904762 | 0.11111111111 | 0.11111111111 | 0.325        | 0.4285714286 |
| POBEC3  | 0.04761904762 | 0.04761904762 | 0.11111111111 | 0.11111111111 | 0.325        | 0.4285714286 |
| POBEC3  | 0.04761904762 | 0.04761904762 | 0.11111111111 | 0.11111111111 | 0.325        | 0.4285714286 |
| POBEC3  | 0.04761904762 | 0.04761904762 | 0.11111111111 | 0.11111111111 | 0.325        | 0.4285714286 |
| APOBR   | 0.04761904762 | 0.04761904762 | 0             | 0             | inf          | 4.7619E+31   |
| APOC1   | 0.09523809524 | 0.09523809524 | 0.11111111111 | 0.11111111111 | 0.6842105263 | 0.8571428571 |
| POC1P   | 0.09523809524 | 0.09523809524 | 0.11111111111 | 0.11111111111 | 0.6842105263 | 0.8571428571 |
| APOC2   | 0.09523809524 | 0.09523809524 | 0.11111111111 | 0.11111111111 | 0.6842105263 | 0.8571428571 |
| APOC4   | 0.09523809524 | 0.09523809524 | 0.11111111111 | 0.11111111111 | 0.6842105263 | 0.8571428571 |
| DC4-APC | 0.09523809524 | 0.09523809524 | 0.11111111111 | 0.11111111111 | 0.6842105263 | 0.8571428571 |
| APOD    | 0.1428571429  | 0.1428571429  | 0.05555555556 | 0.05555555556 | 2.333333333  | 2.571428571  |
| APOE    | 0.09523809524 | 0.09523809524 | 0.11111111111 | 0.11111111111 | 0.6842105263 | 0.8571428571 |
| APOF    | 0.1428571429  | 0.1428571429  | 0.05555555556 | 0.05555555556 | 2.333333333  | 2.571428571  |
| APOH    | 0             | 0             | 0             | 0             |              | 0.00001      |
| APOL1   | 0             | 0             | 0.11111111111 | 0.11111111111 | 0            | 0            |
| APOL2   | 0             | 0             | 0.11111111111 | 0.11111111111 | 0            | 0            |
| APOL3   | 0             | 0             | 0.11111111111 | 0.11111111111 | 0            | 0            |
| APOL4   | 0             | 0             | 0.11111111111 | 0.11111111111 | 0            | 0            |
| APOL5   | 0             | 0             | 0.11111111111 | 0.11111111111 | 0            | 0            |
| APOL6   | 0             | 0             | 0.11111111111 | 0.11111111111 | 0            | 0            |
| APOLD1  | 0.04761904762 | 0.04761904762 | 0.05555555556 | 0.05555555556 | 0.7          | 0.8571428571 |
| APOM    | 0.04761904762 | 0.04761904762 | 0             | 0             | inf          | 4.7619E+31   |
| APOOP5  | 0.04761904762 | 0.04761904762 | 0             | 0             | inf          | 4.7619E+31   |
| APP     | 0.04761904762 | 0.04761904762 | 0.11111111111 | 0.11111111111 | 0.325        | 0.4285714286 |
| APPBP2  | 0.1428571429  | 0.1428571429  | 0             | 0             | inf          | 1.42857E+32  |
| APPL1   | 0.09523809524 | 0.09523809524 | 0             | 0             | inf          | 9.52381E+31  |
| APPL2   | 0.04761904762 | 0.04761904762 | 0.05555555556 | 0.05555555556 | 0.7          | 0.8571428571 |
| APRT    | 0.1904761905  | 0.1904761905  | 0             | 0             | inf          | 1.90476E+32  |
| APTR    | 0.04761904762 | 0.04761904762 | 0.11111111111 | 0.11111111111 | 0.325        | 0.4285714286 |
| APTX    | 0.09523809524 | 0.09523809524 | 0.05555555556 | 0.05555555556 | 1.473684211  | 1.714285714  |
| AQP1    | 0.04761904762 | 0.04761904762 | 0.11111111111 | 0.11111111111 | 0.325        | 0.4285714286 |
| AQP10   | 0.1904761905  | 0.1904761905  | 0.05555555556 | 0.05555555556 | 3.294117647  | 3.428571429  |
| AQP12A  | 0             | 0             | 0.05555555556 | 0.05555555556 | 0            | 0            |
| AQP12B  | 0             | 0             | 0.05555555556 | 0.05555555556 | 0            | 0            |
| AQP2    | 0.04761904762 | 0.04761904762 | 0.05555555556 | 0.05555555556 | 0.7          | 0.8571428571 |
| AQP3    | 0.09523809524 | 0.09523809524 | 0.05555555556 | 0.05555555556 | 1.473684211  | 1.714285714  |
| AQP4    | 0.09523809524 | 0.09523809524 | 0.05555555556 | 0.05555555556 | 1.473684211  | 1.714285714  |
| QP4-AS  | 0.09523809524 | 0.09523809524 | 0.05555555556 | 0.05555555556 | 1.473684211  | 1.714285714  |

|         |               |               |               |               |              |              |
|---------|---------------|---------------|---------------|---------------|--------------|--------------|
| AQP5    | 0.04761904762 | 0.04761904762 | 0.05555555556 | 0.05555555556 | 0.7          | 0.8571428571 |
| AQP6    | 0.04761904762 | 0.04761904762 | 0.05555555556 | 0.05555555556 | 0.7          | 0.8571428571 |
| AQP7    | 0.09523809524 | 0.09523809524 | 0.05555555556 | 0.05555555556 | 1.473684211  | 1.714285714  |
| AQP7P1  | 0.09523809524 | 0.09523809524 | 0.2222222222  | 0.2222222222  | 0.2894736842 | 0.4285714286 |
| AQP7P3  | 0.1904761905  | 0.1904761905  | 0.2222222222  | 0.2222222222  | 0.6470588235 | 0.8571428571 |
| AQP8    | 0.04761904762 | 0.04761904762 | 0             | 0             | inf          | 4.7619E+31   |
| AQP9    | 0.04761904762 | 0.04761904762 | 0.05555555556 | 0.05555555556 | 0.7          | 0.8571428571 |
| ARAP3   | 0.04761904762 | 0.04761904762 | 0             | 0             | inf          | 4.7619E+31   |
| ARC     | 0.04761904762 | 0.04761904762 | 0.1666666667  | 0.1666666667  | 0.2          | 0.2857142857 |
| AREG    | 0.09523809524 | 0.09523809524 | 0.05555555556 | 0.05555555556 | 1.473684211  | 1.714285714  |
| ARF1    | 0.1428571429  | 0.1428571429  | 0             | 0             | inf          | 1.42857E+32  |
| ARF3    | 0.04761904762 | 0.04761904762 | 0.05555555556 | 0.05555555556 | 0.7          | 0.8571428571 |
| ARF4    | 0.09523809524 | 0.09523809524 | 0             | 0             | inf          | 9.52381E+31  |
| RF4-AS  | 0.09523809524 | 0.09523809524 | 0             | 0             | inf          | 9.52381E+31  |
| ARF5    | 0.04761904762 | 0.04761904762 | 0.05555555556 | 0.05555555556 | 0.7          | 0.8571428571 |
| ARF6    | 0.04761904762 | 0.04761904762 | 0             | 0             | inf          | 4.7619E+31   |
| RFGAP   | 0.1428571429  | 0.1428571429  | 0.2222222222  | 0.2222222222  | 0.4583333333 | 0.6428571429 |
| RFGAP   | 0             | 0             | 0.05555555556 | 0.05555555556 | 0            | 0            |
| RFGAP   | 0             | 0             | 0.1666666667  | 0.1666666667  | 0            | 0            |
| RFGEF   | 0.1428571429  | 0.1428571429  | 0.1666666667  | 0.1666666667  | 0.6666666667 | 0.8571428571 |
| RFGEF   | 0.09523809524 | 0.09523809524 | 0.1666666667  | 0.1666666667  | 0.4210526316 | 0.5714285714 |
| ARFIP1  | 0             | 0             | 0.05555555556 | 0.05555555556 | 0            | 0            |
| ARFIP2  | 0.04761904762 | 0.04761904762 | 0             | 0             | inf          | 4.7619E+31   |
| ARFRP1  | 0.1428571429  | 0.1428571429  | 0.2222222222  | 0.2222222222  | 0.4583333333 | 0.6428571429 |
| ARGFX   | 0.1428571429  | 0.1428571429  | 0.05555555556 | 0.05555555556 | 2.333333333  | 2.571428571  |
| RGFXP   | 0             | 0             | 0             | 0             |              | 0.00001      |
| RHGAP   | 0             | 0             | 0.05555555556 | 0.05555555556 | 0            | 0            |
| RHGAP   | 0             | 0             | 0.05555555556 | 0.05555555556 | 0            | 0            |
| RHGAP   | 0.09523809524 | 0.09523809524 | 0.2222222222  | 0.2222222222  | 0.2894736842 | 0.4285714286 |
| RHGAP   | 0             | 0             | 0.05555555556 | 0.05555555556 | 0            | 0            |
| RHGAP   | 0.04761904762 | 0.04761904762 | 0             | 0             | inf          | 4.7619E+31   |
| RHGAP   | 0.1428571429  | 0.1428571429  | 0             | 0             | inf          | 1.42857E+32  |
| GAP19-S | 0.1428571429  | 0.1428571429  | 0             | 0             | inf          | 1.42857E+32  |
| RHGAP   | 0.09523809524 | 0.09523809524 | 0.1111111111  | 0.1111111111  | 0.6842105263 | 0.8571428571 |
| RHGAP   | 0.09523809524 | 0.09523809524 | 0.05555555556 | 0.05555555556 | 1.473684211  | 1.714285714  |
| IGAP22  | 0.09523809524 | 0.09523809524 | 0.05555555556 | 0.05555555556 | 1.473684211  | 1.714285714  |
| RHGAP   | 0             | 0             | 0.05555555556 | 0.05555555556 | 0            | 0            |
| RHGAP   | 0             | 0             | 0.05555555556 | 0.05555555556 | 0            | 0            |
| RHGAP   | 0.04761904762 | 0.04761904762 | 0             | 0             | inf          | 4.7619E+31   |
| IGAP26  | 0.04761904762 | 0.04761904762 | 0             | 0             | inf          | 4.7619E+31   |
| IGAP26  | 0.04761904762 | 0.04761904762 | 0             | 0             | inf          | 4.7619E+31   |
| RHGAP   | 0.1428571429  | 0.1428571429  | 0             | 0             | inf          | 1.42857E+32  |
| HGAP2   | 0.04761904762 | 0.04761904762 | 0             | 0             | inf          | 4.7619E+31   |
| 1-BPTF  | 0.04761904762 | 0.04761904762 | 0             | 0             | inf          | 4.7619E+31   |
| HGAP2   | 0             | 0             | 0             | 0             |              | 0.00001      |
| RHGAP   | 0.09523809524 | 0.09523809524 | 0             | 0             | inf          | 9.52381E+31  |
| RHGAP   | 0.04761904762 | 0.04761904762 | 0.05555555556 | 0.05555555556 | 0.7          | 0.8571428571 |
| RHGAP   | 0.1428571429  | 0.1428571429  | 0             | 0             | inf          | 1.42857E+32  |
| RHGAP   | 0.09523809524 | 0.09523809524 | 0.05555555556 | 0.05555555556 | 1.473684211  | 1.714285714  |
| IGAP31  | 0.09523809524 | 0.09523809524 | 0.05555555556 | 0.05555555556 | 1.473684211  | 1.714285714  |
| RHGAP   | 0.04761904762 | 0.04761904762 | 0.05555555556 | 0.05555555556 | 0.7          | 0.8571428571 |

|        |               |               |              |              |              |              |
|--------|---------------|---------------|--------------|--------------|--------------|--------------|
| RHGAP0 | 0.09523809524 | 0.09523809524 | 0.1111111111 | 0.1111111111 | 0.6842105263 | 0.8571428571 |
| RHGAP0 | 0.09523809524 | 0.09523809524 | 0.2222222222 | 0.2222222222 | 0.2894736842 | 0.4285714286 |
| RHGAP4 | 0.1428571429  | 0.1428571429  | 0.1666666667 | 0.1666666667 | 0.6666666667 | 0.8571428571 |
| RHGAP4 | 0.04761904762 | 0.04761904762 | 0.1111111111 | 0.1111111111 | 0.325        | 0.4285714286 |
| RHGAP4 | 0.09523809524 | 0.09523809524 | 0.1111111111 | 0.1111111111 | 0.6842105263 | 0.8571428571 |
| RHGAP  | 0             | 0             | 0.1666666667 | 0.1666666667 | 0            | 0            |
| RHGD10 | 0.04761904762 | 0.04761904762 | 0            | 0            | inf          | 4.7619E+31   |
| RHGD10 | 0.04761904762 | 0.04761904762 | 0.1111111111 | 0.1111111111 | 0.325        | 0.4285714286 |
| RHGD10 | 0.04761904762 | 0.04761904762 | 0.2222222222 | 0.2222222222 | 0.1375       | 0.2142857143 |
| RHGEF0 | 0.04761904762 | 0.04761904762 | 0.0555555556 | 0.0555555556 | 0.7          | 0.8571428571 |
| RHGEF1 | 0.1428571429  | 0.1428571429  | 0.1111111111 | 0.1111111111 | 1.083333333  | 1.285714286  |
| RHGEF1 | 0.04761904762 | 0.04761904762 | 0.1111111111 | 0.1111111111 | 0.325        | 0.4285714286 |
| RHGEF1 | 0.1428571429  | 0.1428571429  | 0.0555555556 | 0.0555555556 | 2.333333333  | 2.571428571  |
| RHGEF1 | 0.04761904762 | 0.04761904762 | 0.0555555556 | 0.0555555556 | 0.7          | 0.8571428571 |
| RHGEF1 | 0             | 0             | 0.0555555556 | 0.0555555556 | 0            | 0            |
| RHGEF1 | 0.1428571429  | 0.1428571429  | 0.0555555556 | 0.0555555556 | 2.333333333  | 2.571428571  |
| RHGEF1 | 0.04761904762 | 0.04761904762 | 0.1111111111 | 0.1111111111 | 0.325        | 0.4285714286 |
| RHGEF1 | 0.1428571429  | 0.1428571429  | 0.1111111111 | 0.1111111111 | 1.083333333  | 1.285714286  |
| RHGEF2 | 0.1428571429  | 0.1428571429  | 0.0555555556 | 0.0555555556 | 2.333333333  | 2.571428571  |
| RHGEF2 | 0.1904761905  | 0.1904761905  | 0.0555555556 | 0.0555555556 | 3.294117647  | 3.428571429  |
| IGEF26 | 0.1904761905  | 0.1904761905  | 0.0555555556 | 0.0555555556 | 3.294117647  | 3.428571429  |
| RHGEF2 | 0             | 0             | 0.0555555556 | 0.0555555556 | 0            | 0            |
| RHGEF2 | 0.04761904762 | 0.04761904762 | 0            | 0            | inf          | 4.7619E+31   |
| HGEF3- | 0.04761904762 | 0.04761904762 | 0            | 0            | inf          | 4.7619E+31   |
| RHGEF3 | 0             | 0             | 0.0555555556 | 0.0555555556 | 0            | 0            |
| RHGEF3 | 0.09523809524 | 0.09523809524 | 0.0555555556 | 0.0555555556 | 1.473684211  | 1.714285714  |
| RHGEF3 | 0.04761904762 | 0.04761904762 | 0.0555555556 | 0.0555555556 | 0.7          | 0.8571428571 |
| RHGEF3 | 0             | 0             | 0.0555555556 | 0.0555555556 | 0            | 0            |
| IGEF38 | 0             | 0             | 0.0555555556 | 0.0555555556 | 0            | 0            |
| RHGEF3 | 0.09523809524 | 0.09523809524 | 0.0555555556 | 0.0555555556 | 1.473684211  | 1.714285714  |
| RHGEF  | 0             | 0             | 0.0555555556 | 0.0555555556 | 0            | 0            |
| RHGEF  | 0.09523809524 | 0.09523809524 | 0.0555555556 | 0.0555555556 | 1.473684211  | 1.714285714  |
| ARID1A | 0.04761904762 | 0.04761904762 | 0.1111111111 | 0.1111111111 | 0.325        | 0.4285714286 |
| ARID2  | 0.04761904762 | 0.04761904762 | 0.0555555556 | 0.0555555556 | 0.7          | 0.8571428571 |
| ARID3A | 0.09523809524 | 0.09523809524 | 0.1111111111 | 0.1111111111 | 0.6842105263 | 0.8571428571 |
| ARID3B | 0.04761904762 | 0.04761904762 | 0.0555555556 | 0.0555555556 | 0.7          | 0.8571428571 |
| ARID3C | 0.09523809524 | 0.09523809524 | 0.0555555556 | 0.0555555556 | 1.473684211  | 1.714285714  |
| ARID4A | 0.04761904762 | 0.04761904762 | 0            | 0            | inf          | 4.7619E+31   |
| ARID4B | 0.1428571429  | 0.1428571429  | 0.0555555556 | 0.0555555556 | 2.333333333  | 2.571428571  |
| ARID5A | 0             | 0             | 0.1111111111 | 0.1111111111 | 0            | 0            |
| ARID5B | 0.04761904762 | 0.04761904762 | 0.1666666667 | 0.1666666667 | 0.2          | 0.2857142857 |
| ARIH1  | 0.04761904762 | 0.04761904762 | 0.0555555556 | 0.0555555556 | 0.7          | 0.8571428571 |
| ARIH2  | 0.09523809524 | 0.09523809524 | 0            | 0            | inf          | 9.52381E+31  |
| RIH200 | 0.09523809524 | 0.09523809524 | 0            | 0            | inf          | 9.52381E+31  |
| ARL1   | 0.04761904762 | 0.04761904762 | 0.0555555556 | 0.0555555556 | 0.7          | 0.8571428571 |
| ARL10  | 0.09523809524 | 0.09523809524 | 0.0555555556 | 0.0555555556 | 1.473684211  | 1.714285714  |
| ARL13B | 0.04761904762 | 0.04761904762 | 0.0555555556 | 0.0555555556 | 0.7          | 0.8571428571 |
| ARL14  | 0.1428571429  | 0.1428571429  | 0.0555555556 | 0.0555555556 | 2.333333333  | 2.571428571  |
| RL14EP | 0.04761904762 | 0.04761904762 | 0            | 0            | inf          | 4.7619E+31   |
| ARL15  | 0.04761904762 | 0.04761904762 | 0.0555555556 | 0.0555555556 | 0.7          | 0.8571428571 |
| ARL16  | 0.04761904762 | 0.04761904762 | 0            | 0            | inf          | 4.7619E+31   |

|         |               |               |               |               |              |              |
|---------|---------------|---------------|---------------|---------------|--------------|--------------|
| ARL17A  | 0.2380952381  | 0.2380952381  | 0             | 0             | inf          | 2.38095E+32  |
| ARL17B  | 0.2380952381  | 0.2380952381  | 0             | 0             | inf          | 2.38095E+32  |
| ARL2BP  | 0.04761904762 | 0.04761904762 | 0             | 0             | inf          | 4.7619E+31   |
| ARL3    | 0.1428571429  | 0.1428571429  | 0.05555555556 | 0.05555555556 | 2.333333333  | 2.571428571  |
| ARL4A   | 0.04761904762 | 0.04761904762 | 0.2222222222  | 0.2222222222  | 0.1375       | 0.2142857143 |
| ARL4C   | 0             | 0             | 0.05555555556 | 0.05555555556 | 0            | 0            |
| ARL4D   | 0.04761904762 | 0.04761904762 | 0             | 0             | inf          | 4.7619E+31   |
| ARL5A   | 0             | 0             | 0.05555555556 | 0.05555555556 | 0            | 0            |
| ARL5B   | 0.09523809524 | 0.09523809524 | 0.1111111111  | 0.1111111111  | 0.6842105263 | 0.8571428571 |
| ARL5C   | 0.09523809524 | 0.09523809524 | 0             | 0             | inf          | 9.52381E+31  |
| ARL6    | 0.04761904762 | 0.04761904762 | 0.05555555556 | 0.05555555556 | 0.7          | 0.8571428571 |
| ARL6IP1 | 0.04761904762 | 0.04761904762 | 0             | 0             | inf          | 4.7619E+31   |
| ARL6IP4 | 0.04761904762 | 0.04761904762 | 0.1111111111  | 0.1111111111  | 0.325        | 0.4285714286 |
| ARL6IP5 | 0.04761904762 | 0.04761904762 | 0             | 0             | inf          | 4.7619E+31   |
| ARL6IP6 | 0             | 0             | 0.05555555556 | 0.05555555556 | 0            | 0            |
| ARL8A   | 0.1428571429  | 0.1428571429  | 0             | 0             | inf          | 1.42857E+32  |
| ARL8B   | 0.04761904762 | 0.04761904762 | 0             | 0             | inf          | 4.7619E+31   |
| ARLNC1  | 0.09523809524 | 0.09523809524 | 0             | 0             | inf          | 9.52381E+31  |
| ARMC1   | 0.1428571429  | 0.1428571429  | 0.1666666667  | 0.1666666667  | 0.6666666667 | 0.8571428571 |
| ARMC10  | 0.04761904762 | 0.04761904762 | 0.05555555556 | 0.05555555556 | 0.7          | 0.8571428571 |
| ARMC12  | 0.04761904762 | 0.04761904762 | 0.05555555556 | 0.05555555556 | 0.7          | 0.8571428571 |
| ARMC2   | 0             | 0             | 0             | 0             |              | 0.00001      |
| RMC2-A  | 0             | 0             | 0             | 0             |              | 0.00001      |
| ARMC3   | 0.09523809524 | 0.09523809524 | 0.1111111111  | 0.1111111111  | 0.6842105263 | 0.8571428571 |
| ARMC4   | 0.09523809524 | 0.09523809524 | 0.1111111111  | 0.1111111111  | 0.6842105263 | 0.8571428571 |
| RMC4P   | 0.09523809524 | 0.09523809524 | 0.1111111111  | 0.1111111111  | 0.6842105263 | 0.8571428571 |
| ARMC5   | 0.04761904762 | 0.04761904762 | 0             | 0             | inf          | 4.7619E+31   |
| ARMC6   | 0.1428571429  | 0.1428571429  | 0.1111111111  | 0.1111111111  | 1.083333333  | 1.285714286  |
| ARMC7   | 0.04761904762 | 0.04761904762 | 0.05555555556 | 0.05555555556 | 0.7          | 0.8571428571 |
| ARMC8   | 0.1428571429  | 0.1428571429  | 0.05555555556 | 0.05555555556 | 2.333333333  | 2.571428571  |
| ARMC9   | 0             | 0             | 0.05555555556 | 0.05555555556 | 0            | 0            |
| ARMH1   | 0.04761904762 | 0.04761904762 | 0.05555555556 | 0.05555555556 | 0.7          | 0.8571428571 |
| ARMH2   | 0             | 0             | 0.05555555556 | 0.05555555556 | 0            | 0            |
| ARMH3   | 0.1428571429  | 0.1428571429  | 0.05555555556 | 0.05555555556 | 2.333333333  | 2.571428571  |
| ARMH4   | 0.04761904762 | 0.04761904762 | 0             | 0             | inf          | 4.7619E+31   |
| ARMS2   | 0.1428571429  | 0.1428571429  | 0.05555555556 | 0.05555555556 | 2.333333333  | 2.571428571  |
| ARNT    | 0.1904761905  | 0.1904761905  | 0.05555555556 | 0.05555555556 | 3.294117647  | 3.428571429  |
| ARNT2   | 0.04761904762 | 0.04761904762 | 0.05555555556 | 0.05555555556 | 0.7          | 0.8571428571 |
| ARNTL2  | 0.04761904762 | 0.04761904762 | 0.05555555556 | 0.05555555556 | 0.7          | 0.8571428571 |
| NTL2-A  | 0.04761904762 | 0.04761904762 | 0.05555555556 | 0.05555555556 | 0.7          | 0.8571428571 |
| ARPC1A  | 0.04761904762 | 0.04761904762 | 0.05555555556 | 0.05555555556 | 0.7          | 0.8571428571 |
| ARPC1B  | 0.04761904762 | 0.04761904762 | 0.05555555556 | 0.05555555556 | 0.7          | 0.8571428571 |
| ARPC2   | 0             | 0             | 0.05555555556 | 0.05555555556 | 0            | 0            |
| ARPC3   | 0             | 0             | 0.1111111111  | 0.1111111111  | 0            | 0            |
| ARPC4   | 0.09523809524 | 0.09523809524 | 0             | 0             | inf          | 9.52381E+31  |
| PC4-TT1 | 0.09523809524 | 0.09523809524 | 0             | 0             | inf          | 9.52381E+31  |
| ARPC5L  | 0.09523809524 | 0.09523809524 | 0.05555555556 | 0.05555555556 | 1.473684211  | 1.714285714  |
| ARPIN   | 0.04761904762 | 0.04761904762 | 0.05555555556 | 0.05555555556 | 0.7          | 0.8571428571 |
| PIN-AP3 | 0.04761904762 | 0.04761904762 | 0.05555555556 | 0.05555555556 | 0.7          | 0.8571428571 |
| ARPP19  | 0.04761904762 | 0.04761904762 | 0.05555555556 | 0.05555555556 | 0.7          | 0.8571428571 |
| ARPP21  | 0.04761904762 | 0.04761904762 | 0             | 0             | inf          | 4.7619E+31   |

|         |               |               |               |               |              |              |
|---------|---------------|---------------|---------------|---------------|--------------|--------------|
| ARRB2   | 0             | 0             | 0.1111111111  | 0.1111111111  | 0            | 0            |
| ARRDC0  | 0.09523809524 | 0.09523809524 | 0             | 0             | inf          | 9.52381E+31  |
| RDC1-A  | 0.09523809524 | 0.09523809524 | 0             | 0             | inf          | 9.52381E+31  |
| ARRDC2  | 0.1428571429  | 0.1428571429  | 0.1111111111  | 0.1111111111  | 1.083333333  | 1.285714286  |
| ARRDC3  | 0.04761904762 | 0.04761904762 | 0             | 0             | inf          | 4.7619E+31   |
| RDC3-A  | 0.04761904762 | 0.04761904762 | 0             | 0             | inf          | 4.7619E+31   |
| ARRDC4  | 0.04761904762 | 0.04761904762 | 0.05555555556 | 0.05555555556 | 0.7          | 0.8571428571 |
| ARRDC5  | 0.09523809524 | 0.09523809524 | 0.05555555556 | 0.05555555556 | 1.473684211  | 1.714285714  |
| ARSA    | 0             | 0             | 0.1111111111  | 0.1111111111  | 0            | 0            |
| ARSB    | 0.04761904762 | 0.04761904762 | 0             | 0             | inf          | 4.7619E+31   |
| ARSG    | 0             | 0             | 0             | 0             |              | 0.00001      |
| ARSJ    | 0             | 0             | 0.05555555556 | 0.05555555556 | 0            | 0            |
| ARSK    | 0.04761904762 | 0.04761904762 | 0             | 0             | inf          | 4.7619E+31   |
| ART1    | 0.04761904762 | 0.04761904762 | 0             | 0             | inf          | 4.7619E+31   |
| ART3    | 0.04761904762 | 0.04761904762 | 0.05555555556 | 0.05555555556 | 0.7          | 0.8571428571 |
| ART4    | 0.04761904762 | 0.04761904762 | 0.1111111111  | 0.1111111111  | 0.325        | 0.4285714286 |
| ART5    | 0.04761904762 | 0.04761904762 | 0             | 0             | inf          | 4.7619E+31   |
| ARTN    | 0.04761904762 | 0.04761904762 | 0.05555555556 | 0.05555555556 | 0.7          | 0.8571428571 |
| ARV1    | 0.1428571429  | 0.1428571429  | 0             | 0             | inf          | 1.42857E+32  |
| ARVCF   | 0.04761904762 | 0.04761904762 | 0.05555555556 | 0.05555555556 | 0.7          | 0.8571428571 |
| S-PTPR  | 0.2380952381  | 0.2380952381  | 0.05555555556 | 0.05555555556 | 4.375        | 4.285714286  |
| AS3MT   | 0.1428571429  | 0.1428571429  | 0.05555555556 | 0.05555555556 | 2.333333333  | 2.571428571  |
| ASAH1   | 0.09523809524 | 0.09523809524 | 0.1111111111  | 0.1111111111  | 0.6842105263 | 0.8571428571 |
| ASAH2   | 0.04761904762 | 0.04761904762 | 0.05555555556 | 0.05555555556 | 0.7          | 0.8571428571 |
| ASAH2B  | 0.04761904762 | 0.04761904762 | 0.05555555556 | 0.05555555556 | 0.7          | 0.8571428571 |
| ASAP1   | 0.04761904762 | 0.04761904762 | 0.1111111111  | 0.1111111111  | 0.325        | 0.4285714286 |
| SAP1-IT | 0.04761904762 | 0.04761904762 | 0.1111111111  | 0.1111111111  | 0.325        | 0.4285714286 |
| SAP1-IT | 0.04761904762 | 0.04761904762 | 0.1111111111  | 0.1111111111  | 0.325        | 0.4285714286 |
| ASAP2   | 0             | 0             | 0.05555555556 | 0.05555555556 | 0            | 0            |
| ASAP3   | 0.04761904762 | 0.04761904762 | 0.1111111111  | 0.1111111111  | 0.325        | 0.4285714286 |
| ASB1    | 0             | 0             | 0.05555555556 | 0.05555555556 | 0            | 0            |
| ASB10   | 0.09523809524 | 0.09523809524 | 0.05555555556 | 0.05555555556 | 1.473684211  | 1.714285714  |
| ASB13   | 0.04761904762 | 0.04761904762 | 0.1666666667  | 0.1666666667  | 0.2          | 0.2857142857 |
| ASB14   | 0.09523809524 | 0.09523809524 | 0             | 0             | inf          | 9.52381E+31  |
| ASB15   | 0.04761904762 | 0.04761904762 | 0.05555555556 | 0.05555555556 | 0.7          | 0.8571428571 |
| ASB16   | 0.09523809524 | 0.09523809524 | 0             | 0             | inf          | 9.52381E+31  |
| SB16-AS | 0.09523809524 | 0.09523809524 | 0             | 0             | inf          | 9.52381E+31  |
| ASB17   | 0.04761904762 | 0.04761904762 | 0.05555555556 | 0.05555555556 | 0.7          | 0.8571428571 |
| ASB18   | 0             | 0             | 0.05555555556 | 0.05555555556 | 0            | 0            |
| ASB3    | 0.04761904762 | 0.04761904762 | 0.05555555556 | 0.05555555556 | 0.7          | 0.8571428571 |
| ASB4    | 0.04761904762 | 0.04761904762 | 0.1111111111  | 0.1111111111  | 0.325        | 0.4285714286 |
| ASB5    | 0             | 0             | 0.05555555556 | 0.05555555556 | 0            | 0            |
| ASB6    | 0.09523809524 | 0.09523809524 | 0.05555555556 | 0.05555555556 | 1.473684211  | 1.714285714  |
| ASB7    | 0.04761904762 | 0.04761904762 | 0.05555555556 | 0.05555555556 | 0.7          | 0.8571428571 |
| ASB8    | 0.04761904762 | 0.04761904762 | 0.05555555556 | 0.05555555556 | 0.7          | 0.8571428571 |
| ASB9P1  | 0.04761904762 | 0.04761904762 | 0.05555555556 | 0.05555555556 | 0.7          | 0.8571428571 |
| ASCC1   | 0.1904761905  | 0.1904761905  | 0.05555555556 | 0.05555555556 | 3.294117647  | 3.428571429  |
| ASCC2   | 0.04761904762 | 0.04761904762 | 0.1111111111  | 0.1111111111  | 0.325        | 0.4285714286 |
| ASCL1   | 0.04761904762 | 0.04761904762 | 0.1111111111  | 0.1111111111  | 0.325        | 0.4285714286 |
| ASCL2   | 0.04761904762 | 0.04761904762 | 0             | 0             | inf          | 4.7619E+31   |
| ASCL4   | 0.04761904762 | 0.04761904762 | 0.05555555556 | 0.05555555556 | 0.7          | 0.8571428571 |

|         |               |               |               |               |              |              |
|---------|---------------|---------------|---------------|---------------|--------------|--------------|
| ASCL5   | 0.1428571429  | 0.1428571429  | 0             | 0             | inf          | 1.42857E+32  |
| ASDURF  | 0             | 0             | 0.05555555556 | 0.05555555556 | 0            | 0            |
| ASF1B   | 0.1428571429  | 0.1428571429  | 0.1111111111  | 0.1111111111  | 1.083333333  | 1.285714286  |
| ASGR1   | 0             | 0             | 0.05555555556 | 0.05555555556 | 0            | 0            |
| ASGR2   | 0             | 0             | 0.05555555556 | 0.05555555556 | 0            | 0            |
| ASH1L   | 0.1904761905  | 0.1904761905  | 0.1111111111  | 0.1111111111  | 1.529411765  | 1.714285714  |
| SH1L-AS | 0.1904761905  | 0.1904761905  | 0.1111111111  | 0.1111111111  | 1.529411765  | 1.714285714  |
| ASH2L   | 0.09523809524 | 0.09523809524 | 0.1111111111  | 0.1111111111  | 0.6842105263 | 0.8571428571 |
| ASIC1   | 0.04761904762 | 0.04761904762 | 0.05555555556 | 0.05555555556 | 0.7          | 0.8571428571 |
| ASIC2   | 0.09523809524 | 0.09523809524 | 0             | 0             | inf          | 9.52381E+31  |
| ASIC3   | 0.09523809524 | 0.09523809524 | 0.05555555556 | 0.05555555556 | 1.473684211  | 1.714285714  |
| ASIC4   | 0             | 0             | 0.05555555556 | 0.05555555556 | 0            | 0            |
| ASIC5   | 0             | 0             | 0.1111111111  | 0.1111111111  | 0            | 0            |
| ASIP    | 0.09523809524 | 0.09523809524 | 0.1111111111  | 0.1111111111  | 0.6842105263 | 0.8571428571 |
| ASL     | 0.04761904762 | 0.04761904762 | 0.1111111111  | 0.1111111111  | 0.325        | 0.4285714286 |
| ASNA1   | 0.1428571429  | 0.1428571429  | 0.1111111111  | 0.1111111111  | 1.083333333  | 1.285714286  |
| ASNS    | 0.04761904762 | 0.04761904762 | 0.05555555556 | 0.05555555556 | 0.7          | 0.8571428571 |
| ANSND1  | 0             | 0             | 0.05555555556 | 0.05555555556 | 0            | 0            |
| ANSNP1  | 0.09523809524 | 0.09523809524 | 0.1666666667  | 0.1666666667  | 0.4210526316 | 0.5714285714 |
| ASPA    | 0             | 0             | 0.1111111111  | 0.1111111111  | 0            | 0            |
| ASPDH   | 0.09523809524 | 0.09523809524 | 0.1111111111  | 0.1111111111  | 0.6842105263 | 0.8571428571 |
| ASPH    | 0.1428571429  | 0.1428571429  | 0.1666666667  | 0.1666666667  | 0.6666666667 | 0.8571428571 |
| ASPHD1  | 0.04761904762 | 0.04761904762 | 0             | 0             | inf          | 4.7619E+31   |
| ASPHD2  | 0.04761904762 | 0.04761904762 | 0.05555555556 | 0.05555555556 | 0.7          | 0.8571428571 |
| ASPM    | 0.1428571429  | 0.1428571429  | 0             | 0             | inf          | 1.42857E+32  |
| ASPN    | 0.04761904762 | 0.04761904762 | 0.05555555556 | 0.05555555556 | 0.7          | 0.8571428571 |
| ASPRV1  | 0             | 0             | 0.05555555556 | 0.05555555556 | 0            | 0            |
| ASPCRO  | 0.04761904762 | 0.04761904762 | 0             | 0             | inf          | 4.7619E+31   |
| ASS1    | 0.09523809524 | 0.09523809524 | 0.05555555556 | 0.05555555556 | 1.473684211  | 1.714285714  |
| ASTE1   | 0.09523809524 | 0.09523809524 | 0.05555555556 | 0.05555555556 | 1.473684211  | 1.714285714  |
| ASTL    | 0             | 0             | 0.1111111111  | 0.1111111111  | 0            | 0            |
| ASTN1   | 0.1428571429  | 0.1428571429  | 0             | 0             | inf          | 1.42857E+32  |
| ASTN2   | 0.04761904762 | 0.04761904762 | 0.05555555556 | 0.05555555556 | 0.7          | 0.8571428571 |
| STN2-AS | 0.04761904762 | 0.04761904762 | 0.05555555556 | 0.05555555556 | 0.7          | 0.8571428571 |
| ASXL1   | 0.09523809524 | 0.09523809524 | 0.1111111111  | 0.1111111111  | 0.6842105263 | 0.8571428571 |
| ASXL3   | 0.09523809524 | 0.09523809524 | 0             | 0             | inf          | 9.52381E+31  |
| ASZ1    | 0.09523809524 | 0.09523809524 | 0.05555555556 | 0.05555555556 | 1.473684211  | 1.714285714  |
| ATAD1   | 0.1428571429  | 0.1428571429  | 0.1666666667  | 0.1666666667  | 0.6666666667 | 0.8571428571 |
| ATAD2   | 0.1428571429  | 0.1428571429  | 0.1111111111  | 0.1111111111  | 1.083333333  | 1.285714286  |
| ATAD2E  | 0             | 0             | 0.05555555556 | 0.05555555556 | 0            | 0            |
| ATAD3A  | 0             | 0             | 0.1111111111  | 0.1111111111  | 0            | 0            |
| ATAD3E  | 0             | 0             | 0.1111111111  | 0.1111111111  | 0            | 0            |
| ATAD3C  | 0             | 0             | 0.1111111111  | 0.1111111111  | 0            | 0            |
| ATAD5   | 0             | 0             | 0.05555555556 | 0.05555555556 | 0            | 0            |
| ATCAY   | 0.09523809524 | 0.09523809524 | 0.05555555556 | 0.05555555556 | 1.473684211  | 1.714285714  |
| ATE1    | 0.2380952381  | 0.2380952381  | 0.05555555556 | 0.05555555556 | 4.375        | 4.285714286  |
| TE1-AS  | 0.2380952381  | 0.2380952381  | 0.05555555556 | 0.05555555556 | 4.375        | 4.285714286  |
| ATF1    | 0.09523809524 | 0.09523809524 | 0.05555555556 | 0.05555555556 | 1.473684211  | 1.714285714  |
| ATF2    | 0             | 0             | 0.1111111111  | 0.1111111111  | 0            | 0            |
| ATF3    | 0.09523809524 | 0.09523809524 | 0             | 0             | inf          | 9.52381E+31  |
| ATF4    | 0             | 0             | 0.1111111111  | 0.1111111111  | 0            | 0            |

|         |               |               |               |               |             |              |
|---------|---------------|---------------|---------------|---------------|-------------|--------------|
| ATF6    | 0.1428571429  | 0.1428571429  | 0             | 0             | inf         | 1.42857E+32  |
| ATF6B   | 0.04761904762 | 0.04761904762 | 0             | 0             | inf         | 4.7619E+31   |
| ATF7    | 0.04761904762 | 0.04761904762 | 0.05555555556 | 0.05555555556 | 0.7         | 0.8571428571 |
| ATF7-NP | 0.04761904762 | 0.04761904762 | 0.05555555556 | 0.05555555556 | 0.7         | 0.8571428571 |
| ATF7IP  | 0.04761904762 | 0.04761904762 | 0.1111111111  | 0.1111111111  | 0.325       | 0.4285714286 |
| ATF7IP2 | 0.04761904762 | 0.04761904762 | 0             | 0             | inf         | 4.7619E+31   |
| ATG10   | 0.04761904762 | 0.04761904762 | 0.05555555556 | 0.05555555556 | 0.7         | 0.8571428571 |
| ATG10I  | 0.04761904762 | 0.04761904762 | 0.05555555556 | 0.05555555556 | 0.7         | 0.8571428571 |
| ATG12   | 0.04761904762 | 0.04761904762 | 0             | 0             | inf         | 4.7619E+31   |
| ATG13   | 0             | 0             | 0.05555555556 | 0.05555555556 | 0           | 0            |
| ATG14   | 0.04761904762 | 0.04761904762 | 0             | 0             | inf         | 4.7619E+31   |
| ATG16L  | 0             | 0             | 0.05555555556 | 0.05555555556 | 0           | 0            |
| ATG3    | 0.09523809524 | 0.09523809524 | 0.05555555556 | 0.05555555556 | 1.473684211 | 1.714285714  |
| ATG4B   | 0             | 0             | 0.05555555556 | 0.05555555556 | 0           | 0            |
| ATG4C   | 0.04761904762 | 0.04761904762 | 0.05555555556 | 0.05555555556 | 0.7         | 0.8571428571 |
| ATG4D   | 0.1428571429  | 0.1428571429  | 0.1111111111  | 0.1111111111  | 1.083333333 | 1.285714286  |
| ATG7    | 0.09523809524 | 0.09523809524 | 0             | 0             | inf         | 9.52381E+31  |
| ATG9B   | 0.09523809524 | 0.09523809524 | 0.05555555556 | 0.05555555556 | 1.473684211 | 1.714285714  |
| ATIC    | 0             | 0             | 0.05555555556 | 0.05555555556 | 0           | 0            |
| ATL1    | 0.04761904762 | 0.04761904762 | 0             | 0             | inf         | 4.7619E+31   |
| ATL2    | 0             | 0             | 0.05555555556 | 0.05555555556 | 0           | 0            |
| ATMIN   | 0.09523809524 | 0.09523809524 | 0             | 0             | inf         | 9.52381E+31  |
| ATN1    | 0.04761904762 | 0.04761904762 | 0.1111111111  | 0.1111111111  | 0.325       | 0.4285714286 |
| ATOH1   | 0             | 0             | 0.05555555556 | 0.05555555556 | 0           | 0            |
| ATOH7   | 0.1904761905  | 0.1904761905  | 0.05555555556 | 0.05555555556 | 3.294117647 | 3.428571429  |
| ATOH8   | 0             | 0             | 0.05555555556 | 0.05555555556 | 0           | 0            |
| ATP10B  | 0.04761904762 | 0.04761904762 | 0.05555555556 | 0.05555555556 | 0.7         | 0.8571428571 |
| ATP10D  | 0.04761904762 | 0.04761904762 | 0.05555555556 | 0.05555555556 | 0.7         | 0.8571428571 |
| ATP11B  | 0.1904761905  | 0.1904761905  | 0.05555555556 | 0.05555555556 | 3.294117647 | 3.428571429  |
| ATP13A  | 0.1428571429  | 0.1428571429  | 0.1111111111  | 0.1111111111  | 1.083333333 | 1.285714286  |
| ATP13A2 | 0.04761904762 | 0.04761904762 | 0.1111111111  | 0.1111111111  | 0.325       | 0.4285714286 |
| ATP13A3 | 0.09523809524 | 0.09523809524 | 0.05555555556 | 0.05555555556 | 1.473684211 | 1.714285714  |
| ATP13A4 | 0.09523809524 | 0.09523809524 | 0.05555555556 | 0.05555555556 | 1.473684211 | 1.714285714  |
| P13A4-A | 0.09523809524 | 0.09523809524 | 0.05555555556 | 0.05555555556 | 1.473684211 | 1.714285714  |
| ATP13A5 | 0.09523809524 | 0.09523809524 | 0.05555555556 | 0.05555555556 | 1.473684211 | 1.714285714  |
| P13A5-A | 0.09523809524 | 0.09523809524 | 0.05555555556 | 0.05555555556 | 1.473684211 | 1.714285714  |
| ATP1A1  | 0.04761904762 | 0.04761904762 | 0.05555555556 | 0.05555555556 | 0.7         | 0.8571428571 |
| P1A1-A  | 0.04761904762 | 0.04761904762 | 0.05555555556 | 0.05555555556 | 0.7         | 0.8571428571 |
| ATP1A2  | 0.1428571429  | 0.1428571429  | 0             | 0             | inf         | 1.42857E+32  |
| ATP1A3  | 0.04761904762 | 0.04761904762 | 0.05555555556 | 0.05555555556 | 0.7         | 0.8571428571 |
| ATP1A4  | 0.1428571429  | 0.1428571429  | 0             | 0             | inf         | 1.42857E+32  |
| ATP1B1  | 0.1428571429  | 0.1428571429  | 0             | 0             | inf         | 1.42857E+32  |
| ATP1B2  | 0             | 0             | 0.05555555556 | 0.05555555556 | 0           | 0            |
| ATP1B3  | 0.1904761905  | 0.1904761905  | 0.05555555556 | 0.05555555556 | 3.294117647 | 3.428571429  |
| ATP23   | 0.1428571429  | 0.1428571429  | 0.05555555556 | 0.05555555556 | 2.333333333 | 2.571428571  |
| ATP2A1  | 0.04761904762 | 0.04761904762 | 0             | 0             | inf         | 4.7619E+31   |
| P2A1-A  | 0.04761904762 | 0.04761904762 | 0             | 0             | inf         | 4.7619E+31   |
| ATP2A2  | 0             | 0             | 0.1111111111  | 0.1111111111  | 0           | 0            |
| ATP2A3  | 0             | 0             | 0.1111111111  | 0.1111111111  | 0           | 0            |
| ATP2B1  | 0.04761904762 | 0.04761904762 | 0.05555555556 | 0.05555555556 | 0.7         | 0.8571428571 |
| P2B1-A  | 0.04761904762 | 0.04761904762 | 0.05555555556 | 0.05555555556 | 0.7         | 0.8571428571 |

|         |               |               |               |               |              |              |
|---------|---------------|---------------|---------------|---------------|--------------|--------------|
| ATP2B2  | 0.04761904762 | 0.04761904762 | 0             | 0             | inf          | 4.7619E+31   |
| TP2B2-I | 0.04761904762 | 0.04761904762 | 0             | 0             | inf          | 4.7619E+31   |
| ATP2B4  | 0.2380952381  | 0.2380952381  | 0             | 0             | inf          | 2.38095E+32  |
| ATP2C1  | 0.09523809524 | 0.09523809524 | 0.05555555556 | 0.05555555556 | 1.473684211  | 1.714285714  |
| ATP2C2  | 0.04761904762 | 0.04761904762 | 0             | 0             | inf          | 4.7619E+31   |
| TP2C2-A | 0.04761904762 | 0.04761904762 | 0             | 0             | inf          | 4.7619E+31   |
| ATP4A   | 0.04761904762 | 0.04761904762 | 0.05555555556 | 0.05555555556 | 0.7          | 0.8571428571 |
| ATP5F1  | 0.04761904762 | 0.04761904762 | 0.05555555556 | 0.05555555556 | 0.7          | 0.8571428571 |
| ATP5F11 | 0.1428571429  | 0.1428571429  | 0.05555555556 | 0.05555555556 | 2.333333333  | 2.571428571  |
| ATP5F10 | 0.09523809524 | 0.09523809524 | 0.1111111111  | 0.1111111111  | 0.6842105263 | 0.8571428571 |
| ATP5F11 | 0.09523809524 | 0.09523809524 | 0.1111111111  | 0.1111111111  | 0.6842105263 | 0.8571428571 |
| ATP5F11 | 0.1428571429  | 0.1428571429  | 0.2222222222  | 0.2222222222  | 0.4583333333 | 0.6428571429 |
| ATP5IF1 | 0.04761904762 | 0.04761904762 | 0.1111111111  | 0.1111111111  | 0.325        | 0.4285714286 |
| TP5MC   | 0.1428571429  | 0.1428571429  | 0             | 0             | inf          | 1.42857E+32  |
| TP5MC   | 0.04761904762 | 0.04761904762 | 0.05555555556 | 0.05555555556 | 0.7          | 0.8571428571 |
| TP5MC   | 0             | 0             | 0.1111111111  | 0.1111111111  | 0            | 0            |
| ATP5MI  | 0.1428571429  | 0.1428571429  | 0.05555555556 | 0.05555555556 | 2.333333333  | 2.571428571  |
| ATP5MI  | 0.04761904762 | 0.04761904762 | 0             | 0             | inf          | 4.7619E+31   |
| ATP5MI  | 0.04761904762 | 0.04761904762 | 0.05555555556 | 0.05555555556 | 0.7          | 0.8571428571 |
| 5MF-PT  | 0.04761904762 | 0.04761904762 | 0.05555555556 | 0.05555555556 | 0.7          | 0.8571428571 |
| ATP5PB  | 0.04761904762 | 0.04761904762 | 0             | 0             | inf          | 4.7619E+31   |
| ATP5PD  | 0.04761904762 | 0.04761904762 | 0             | 0             | inf          | 4.7619E+31   |
| ATP5PF  | 0.04761904762 | 0.04761904762 | 0.1111111111  | 0.1111111111  | 0.325        | 0.4285714286 |
| ATP5PC  | 0.04761904762 | 0.04761904762 | 0.1111111111  | 0.1111111111  | 0.325        | 0.4285714286 |
| TP6AP1  | 0.04761904762 | 0.04761904762 | 0.05555555556 | 0.05555555556 | 0.7          | 0.8571428571 |
| TP6V0A  | 0.04761904762 | 0.04761904762 | 0             | 0             | inf          | 4.7619E+31   |
| TP6V0A  | 0.04761904762 | 0.04761904762 | 0.05555555556 | 0.05555555556 | 0.7          | 0.8571428571 |
| TP6V0A  | 0.04761904762 | 0.04761904762 | 0.05555555556 | 0.05555555556 | 0.7          | 0.8571428571 |
| ATP6V01 | 0.04761904762 | 0.04761904762 | 0.05555555556 | 0.05555555556 | 0.7          | 0.8571428571 |
| ATP6V00 | 0.04761904762 | 0.04761904762 | 0.1111111111  | 0.1111111111  | 0.325        | 0.4285714286 |
| TP6V0C  | 0.04761904762 | 0.04761904762 | 0.05555555556 | 0.05555555556 | 0.7          | 0.8571428571 |
| TP6V0D  | 0.1428571429  | 0.1428571429  | 0.05555555556 | 0.05555555556 | 2.333333333  | 2.571428571  |
| TP6V0D  | 0.1904761905  | 0.1904761905  | 0.1111111111  | 0.1111111111  | 1.529411765  | 1.714285714  |
| TP6V0E  | 0             | 0             | 0.05555555556 | 0.05555555556 | 0            | 0            |
| TP6V0E  | 0.09523809524 | 0.09523809524 | 0.05555555556 | 0.05555555556 | 1.473684211  | 1.714285714  |
| 6V0E2-  | 0.09523809524 | 0.09523809524 | 0.05555555556 | 0.05555555556 | 1.473684211  | 1.714285714  |
| ATP6V1  | 0.09523809524 | 0.09523809524 | 0.05555555556 | 0.05555555556 | 1.473684211  | 1.714285714  |
| TP6V1E  | 0             | 0             | 0.05555555556 | 0.05555555556 | 0            | 0            |
| 6V1B1-  | 0             | 0             | 0.05555555556 | 0.05555555556 | 0            | 0            |
| TP6V1B  | 0.09523809524 | 0.09523809524 | 0.1111111111  | 0.1111111111  | 0.6842105263 | 0.8571428571 |
| TP6V1C  | 0.1904761905  | 0.1904761905  | 0.1111111111  | 0.1111111111  | 1.529411765  | 1.714285714  |
| TP6V1C  | 0             | 0             | 0.05555555556 | 0.05555555556 | 0            | 0            |
| TP6V1E  | 0.04761904762 | 0.04761904762 | 0             | 0             | inf          | 4.7619E+31   |
| TP6V1E  | 0             | 0             | 0.05555555556 | 0.05555555556 | 0            | 0            |
| ATP6V11 | 0.04761904762 | 0.04761904762 | 0.05555555556 | 0.05555555556 | 0.7          | 0.8571428571 |
| TP6V1F1 | 0.04761904762 | 0.04761904762 | 0.05555555556 | 0.05555555556 | 0.7          | 0.8571428571 |
| TP6V1G  | 0.04761904762 | 0.04761904762 | 0.05555555556 | 0.05555555556 | 0.7          | 0.8571428571 |
| TP6V1G  | 0.04761904762 | 0.04761904762 | 0             | 0             | inf          | 4.7619E+31   |
| 1G2-DI  | 0.04761904762 | 0.04761904762 | 0             | 0             | inf          | 4.7619E+31   |
| TP6V1G  | 0.1428571429  | 0.1428571429  | 0.1111111111  | 0.1111111111  | 1.083333333  | 1.285714286  |
| TP6V11  | 0.1428571429  | 0.1428571429  | 0.1111111111  | 0.1111111111  | 1.083333333  | 1.285714286  |



|          |               |               |               |               |              |              |
|----------|---------------|---------------|---------------|---------------|--------------|--------------|
| ATP8B1   | 0.09523809524 | 0.09523809524 | 0             | 0             | inf          | 9.52381E+31  |
| ATP8B2   | 0.1904761905  | 0.1904761905  | 0.05555555556 | 0.05555555556 | 3.294117647  | 3.428571429  |
| ATP8B3   | 0.09523809524 | 0.09523809524 | 0.11111111111 | 0.11111111111 | 0.6842105263 | 0.8571428571 |
| ATP8B4   | 0.04761904762 | 0.04761904762 | 0.05555555556 | 0.05555555556 | 0.7          | 0.8571428571 |
| ATP8B5   | 0.09523809524 | 0.09523809524 | 0.05555555556 | 0.05555555556 | 1.473684211  | 1.714285714  |
| ATP9A    | 0.09523809524 | 0.09523809524 | 0.16666666667 | 0.16666666667 | 0.4210526316 | 0.5714285714 |
| ATP9B    | 0.04761904762 | 0.04761904762 | 0.05555555556 | 0.05555555556 | 0.7          | 0.8571428571 |
| ATPAF1   | 0.04761904762 | 0.04761904762 | 0.05555555556 | 0.05555555556 | 0.7          | 0.8571428571 |
| ATPAF2   | 0.04761904762 | 0.04761904762 | 0.11111111111 | 0.11111111111 | 0.325        | 0.4285714286 |
| TPSCKM   | 0.04761904762 | 0.04761904762 | 0.05555555556 | 0.05555555556 | 0.7          | 0.8571428571 |
| ATR      | 0.2380952381  | 0.2380952381  | 0.05555555556 | 0.05555555556 | 4.375        | 4.285714286  |
| ATRIP    | 0.09523809524 | 0.09523809524 | 0             | 0             | inf          | 9.52381E+31  |
| RIP-TRIP | 0.09523809524 | 0.09523809524 | 0             | 0             | inf          | 9.52381E+31  |
| ATRN     | 0.1904761905  | 0.1904761905  | 0.05555555556 | 0.05555555556 | 3.294117647  | 3.428571429  |
| ATRNL1   | 0.2380952381  | 0.2380952381  | 0             | 0             | inf          | 2.38095E+32  |
| ATXN1    | 0             | 0             | 0             | 0             |              | 0.00001      |
| ATXN10   | 0             | 0             | 0.11111111111 | 0.11111111111 | 0            | 0            |
| ATXN11   | 0.04761904762 | 0.04761904762 | 0             | 0             | inf          | 4.7619E+31   |
| ATXN2    | 0             | 0             | 0.11111111111 | 0.11111111111 | 0            | 0            |
| TXN2-A   | 0             | 0             | 0.11111111111 | 0.11111111111 | 0            | 0            |
| ATXN21   | 0.04761904762 | 0.04761904762 | 0             | 0             | inf          | 4.7619E+31   |
| ATXN7    | 0.04761904762 | 0.04761904762 | 0             | 0             | inf          | 4.7619E+31   |
| TXN7L    | 0.04761904762 | 0.04761904762 | 0.05555555556 | 0.05555555556 | 0.7          | 0.8571428571 |
| TXN7L    | 0.04761904762 | 0.04761904762 | 0.05555555556 | 0.05555555556 | 0.7          | 0.8571428571 |
| TXN7L    | 0.09523809524 | 0.09523809524 | 0             | 0             | inf          | 9.52381E+31  |
| TXN7L3   | 0.04761904762 | 0.04761904762 | 0.05555555556 | 0.05555555556 | 0.7          | 0.8571428571 |
| AUH      | 0.04761904762 | 0.04761904762 | 0.05555555556 | 0.05555555556 | 0.7          | 0.8571428571 |
| AUNIP    | 0.04761904762 | 0.04761904762 | 0.11111111111 | 0.11111111111 | 0.325        | 0.4285714286 |
| AUPI     | 0             | 0             | 0.05555555556 | 0.05555555556 | 0            | 0            |
| AURKA    | 0.09523809524 | 0.09523809524 | 0.16666666667 | 0.16666666667 | 0.4210526316 | 0.5714285714 |
| URKAI    | 0             | 0             | 0.11111111111 | 0.11111111111 | 0            | 0            |
| URKAP    | 0.1428571429  | 0.1428571429  | 0.05555555556 | 0.05555555556 | 2.333333333  | 2.571428571  |
| AURKB    | 0.04761904762 | 0.04761904762 | 0.05555555556 | 0.05555555556 | 0.7          | 0.8571428571 |
| AURKC    | 0.1428571429  | 0.1428571429  | 0.05555555556 | 0.05555555556 | 2.333333333  | 2.571428571  |
| AUTS2    | 0.04761904762 | 0.04761904762 | 0.11111111111 | 0.11111111111 | 0.325        | 0.4285714286 |
| AVIL     | 0.1428571429  | 0.1428571429  | 0.05555555556 | 0.05555555556 | 2.333333333  | 2.571428571  |
| AVL9     | 0.04761904762 | 0.04761904762 | 0.16666666667 | 0.16666666667 | 0.2          | 0.2857142857 |
| AVP      | 0.1904761905  | 0.1904761905  | 0.05555555556 | 0.05555555556 | 3.294117647  | 3.428571429  |
| AVPI1    | 0.1428571429  | 0.1428571429  | 0             | 0             | inf          | 1.42857E+32  |
| AVPRIA   | 0.09523809524 | 0.09523809524 | 0.05555555556 | 0.05555555556 | 1.473684211  | 1.714285714  |
| AVPRIE   | 0.1428571429  | 0.1428571429  | 0             | 0             | inf          | 1.42857E+32  |
| AXDND1   | 0.1428571429  | 0.1428571429  | 0             | 0             | inf          | 1.42857E+32  |
| AXIN1    | 0.04761904762 | 0.04761904762 | 0.22222222222 | 0.22222222222 | 0.1375       | 0.2142857143 |
| AXIN2    | 0.04761904762 | 0.04761904762 | 0             | 0             | inf          | 4.7619E+31   |
| AXL      | 0.04761904762 | 0.04761904762 | 0.05555555556 | 0.05555555556 | 0.7          | 0.8571428571 |
| AZGP1    | 0.04761904762 | 0.04761904762 | 0.05555555556 | 0.05555555556 | 0.7          | 0.8571428571 |
| AZGP1P   | 0.04761904762 | 0.04761904762 | 0.05555555556 | 0.05555555556 | 0.7          | 0.8571428571 |
| AZI2     | 0.04761904762 | 0.04761904762 | 0             | 0             | inf          | 4.7619E+31   |
| AZIN1    | 0.1904761905  | 0.1904761905  | 0.11111111111 | 0.11111111111 | 1.529411765  | 1.714285714  |
| ZIN1-AS  | 0.1904761905  | 0.1904761905  | 0.11111111111 | 0.11111111111 | 1.529411765  | 1.714285714  |
| AZIN2    | 0.04761904762 | 0.04761904762 | 0.05555555556 | 0.05555555556 | 0.7          | 0.8571428571 |

|           |               |               |              |              |              |              |
|-----------|---------------|---------------|--------------|--------------|--------------|--------------|
| AZU1      | 0.09523809524 | 0.09523809524 | 0.1111111111 | 0.1111111111 | 0.6842105263 | 0.8571428571 |
| B3GALN1   | 0.1428571429  | 0.1428571429  | 0.0555555556 | 0.0555555556 | 2.333333333  | 2.571428571  |
| B3GALN1   | 0.1428571429  | 0.1428571429  | 0.0555555556 | 0.0555555556 | 2.333333333  | 2.571428571  |
| B3GALT    | 0.04761904762 | 0.04761904762 | 0.0555555556 | 0.0555555556 | 0.7          | 0.8571428571 |
| B3GALT    | 0.1428571429  | 0.1428571429  | 0            | 0            | inf          | 1.42857E+32  |
| B3GALT    | 0.04761904762 | 0.04761904762 | 0.0555555556 | 0.0555555556 | 0.7          | 0.8571428571 |
| B3GALT5-A | 0.04761904762 | 0.04761904762 | 0.0555555556 | 0.0555555556 | 0.7          | 0.8571428571 |
| B3GALT    | 0             | 0             | 0.1111111111 | 0.1111111111 | 0            | 0            |
| B3GNT10   | 0.09523809524 | 0.09523809524 | 0.0555555556 | 0.0555555556 | 1.473684211  | 1.714285714  |
| B3GNT2    | 0             | 0             | 0.0555555556 | 0.0555555556 | 0            | 0            |
| B3GNT3    | 0.1428571429  | 0.1428571429  | 0.1111111111 | 0.1111111111 | 1.083333333  | 1.285714286  |
| B3GNT4    | 0.04761904762 | 0.04761904762 | 0.1111111111 | 0.1111111111 | 0.325        | 0.4285714286 |
| B3GNT5    | 0.1904761905  | 0.1904761905  | 0.0555555556 | 0.0555555556 | 3.294117647  | 3.428571429  |
| B3GNT7    | 0             | 0             | 0.0555555556 | 0.0555555556 | 0            | 0            |
| B3GNT8    | 0.04761904762 | 0.04761904762 | 0.0555555556 | 0.0555555556 | 0.7          | 0.8571428571 |
| B3GNT9    | 0.1428571429  | 0.1428571429  | 0.0555555556 | 0.0555555556 | 2.333333333  | 2.571428571  |
| B4GALN1   | 0.1428571429  | 0.1428571429  | 0.0555555556 | 0.0555555556 | 2.333333333  | 2.571428571  |
| B4GALN1   | 0.1428571429  | 0.1428571429  | 0            | 0            | inf          | 1.42857E+32  |
| B4GALN1   | 0.04761904762 | 0.04761904762 | 0.1111111111 | 0.1111111111 | 0.325        | 0.4285714286 |
| B4GALN1   | 0.04761904762 | 0.04761904762 | 0            | 0            | inf          | 4.7619E+31   |
| B4GALT    | 0.09523809524 | 0.09523809524 | 0.0555555556 | 0.0555555556 | 1.473684211  | 1.714285714  |
| B4GALT1-A | 0.09523809524 | 0.09523809524 | 0.0555555556 | 0.0555555556 | 1.473684211  | 1.714285714  |
| B4GALT    | 0.04761904762 | 0.04761904762 | 0.0555555556 | 0.0555555556 | 0.7          | 0.8571428571 |
| B4GALT    | 0.1428571429  | 0.1428571429  | 0            | 0            | inf          | 1.42857E+32  |
| B4GALT    | 0.09523809524 | 0.09523809524 | 0.0555555556 | 0.0555555556 | 1.473684211  | 1.714285714  |
| B4GALT4-A | 0.09523809524 | 0.09523809524 | 0.0555555556 | 0.0555555556 | 1.473684211  | 1.714285714  |
| B4GALT    | 0.09523809524 | 0.09523809524 | 0.1666666667 | 0.1666666667 | 0.4210526316 | 0.5714285714 |
| B4GALT    | 0.09523809524 | 0.09523809524 | 0            | 0            | inf          | 9.52381E+31  |
| B4GALT    | 0.09523809524 | 0.09523809524 | 0.0555555556 | 0.0555555556 | 1.473684211  | 1.714285714  |
| B9D1      | 0.04761904762 | 0.04761904762 | 0.1111111111 | 0.1111111111 | 0.325        | 0.4285714286 |
| B9D2      | 0.04761904762 | 0.04761904762 | 0.0555555556 | 0.0555555556 | 0.7          | 0.8571428571 |
| BAALC     | 0.1904761905  | 0.1904761905  | 0.1111111111 | 0.1111111111 | 1.529411765  | 1.714285714  |
| BAALC-A   | 0.1904761905  | 0.1904761905  | 0.1111111111 | 0.1111111111 | 1.529411765  | 1.714285714  |
| BAALC-A   | 0.1904761905  | 0.1904761905  | 0.1111111111 | 0.1111111111 | 1.529411765  | 1.714285714  |
| BAAT      | 0.04761904762 | 0.04761904762 | 0            | 0            | inf          | 4.7619E+31   |
| BABAM1    | 0.1428571429  | 0.1428571429  | 0.1111111111 | 0.1111111111 | 1.083333333  | 1.285714286  |
| BABAM2    | 0             | 0             | 0.1111111111 | 0.1111111111 | 0            | 0            |
| BABAM2-A  | 0             | 0             | 0.1111111111 | 0.1111111111 | 0            | 0            |
| BACE2     | 0.04761904762 | 0.04761904762 | 0.1111111111 | 0.1111111111 | 0.325        | 0.4285714286 |
| BACH1     | 0.04761904762 | 0.04761904762 | 0.1111111111 | 0.1111111111 | 0.325        | 0.4285714286 |
| BACH1-IT  | 0.04761904762 | 0.04761904762 | 0.1111111111 | 0.1111111111 | 0.325        | 0.4285714286 |
| BACH1-IT  | 0.04761904762 | 0.04761904762 | 0.0555555556 | 0.0555555556 | 0.7          | 0.8571428571 |
| BACH2     | 0             | 0             | 0            | 0            |              | 0.00001      |
| BAG1      | 0.09523809524 | 0.09523809524 | 0.0555555556 | 0.0555555556 | 1.473684211  | 1.714285714  |
| BAG2      | 0.04761904762 | 0.04761904762 | 0.0555555556 | 0.0555555556 | 0.7          | 0.8571428571 |
| BAG3      | 0.2380952381  | 0.2380952381  | 0            | 0            | inf          | 2.38095E+32  |
| BAG4      | 0.09523809524 | 0.09523809524 | 0.1111111111 | 0.1111111111 | 0.6842105263 | 0.8571428571 |
| BAG6      | 0.04761904762 | 0.04761904762 | 0            | 0            | inf          | 4.7619E+31   |
| BAGE      | 0.04761904762 | 0.04761904762 | 0            | 0            | inf          | 4.7619E+31   |
| BAGE2     | 0.04761904762 | 0.04761904762 | 0            | 0            | inf          | 4.7619E+31   |
| BAGE3     | 0.04761904762 | 0.04761904762 | 0            | 0            | inf          | 4.7619E+31   |

|         |               |               |               |               |              |              |
|---------|---------------|---------------|---------------|---------------|--------------|--------------|
| BAGE4   | 0.04761904762 | 0.04761904762 | 0             | 0             | inf          | 4.7619E+31   |
| BAGE5   | 0.04761904762 | 0.04761904762 | 0             | 0             | inf          | 4.7619E+31   |
| BAHCC0  | 0.04761904762 | 0.04761904762 | 0             | 0             | inf          | 4.7619E+31   |
| BAIAP2  | 0.04761904762 | 0.04761904762 | 0             | 0             | inf          | 4.7619E+31   |
| AIAP2-D | 0.04761904762 | 0.04761904762 | 0             | 0             | inf          | 4.7619E+31   |
| AIAP2L  | 0.04761904762 | 0.04761904762 | 0.05555555556 | 0.05555555556 | 0.7          | 0.8571428571 |
| AIAP2L  | 0.04761904762 | 0.04761904762 | 0.11111111111 | 0.11111111111 | 0.325        | 0.4285714286 |
| BAIAP3  | 0.04761904762 | 0.04761904762 | 0.22222222222 | 0.22222222222 | 0.1375       | 0.2142857143 |
| BAK1    | 0.04761904762 | 0.04761904762 | 0             | 0             | inf          | 4.7619E+31   |
| BAMBI   | 0.09523809524 | 0.09523809524 | 0.11111111111 | 0.11111111111 | 0.6842105263 | 0.8571428571 |
| BANCR   | 0             | 0             | 0.05555555556 | 0.05555555556 | 0            | 0            |
| BANF2   | 0.1904761905  | 0.1904761905  | 0.11111111111 | 0.11111111111 | 1.529411765  | 1.714285714  |
| BANK1   | 0             | 0             | 0.05555555556 | 0.05555555556 | 0            | 0            |
| BANP    | 0.04761904762 | 0.04761904762 | 0             | 0             | inf          | 4.7619E+31   |
| BAP1    | 0.04761904762 | 0.04761904762 | 0             | 0             | inf          | 4.7619E+31   |
| BARD1   | 0             | 0             | 0.05555555556 | 0.05555555556 | 0            | 0            |
| BARHL1  | 0.04761904762 | 0.04761904762 | 0             | 0             | inf          | 4.7619E+31   |
| BARHL2  | 0.04761904762 | 0.04761904762 | 0.05555555556 | 0.05555555556 | 0.7          | 0.8571428571 |
| BARX1   | 0.04761904762 | 0.04761904762 | 0.05555555556 | 0.05555555556 | 0.7          | 0.8571428571 |
| ARX1-D  | 0.04761904762 | 0.04761904762 | 0.05555555556 | 0.05555555556 | 0.7          | 0.8571428571 |
| BASP1   | 0.04761904762 | 0.04761904762 | 0.05555555556 | 0.05555555556 | 0.7          | 0.8571428571 |
| ASPI-AS | 0.04761904762 | 0.04761904762 | 0.05555555556 | 0.05555555556 | 0.7          | 0.8571428571 |
| BATF3   | 0.09523809524 | 0.09523809524 | 0             | 0             | inf          | 9.52381E+31  |
| BAX     | 0.09523809524 | 0.09523809524 | 0.11111111111 | 0.11111111111 | 0.6842105263 | 0.8571428571 |
| BAZ1A   | 0.09523809524 | 0.09523809524 | 0             | 0             | inf          | 9.52381E+31  |
| BAZ1B   | 0.1428571429  | 0.1428571429  | 0.11111111111 | 0.11111111111 | 1.083333333  | 1.285714286  |
| BAZ2A   | 0.1428571429  | 0.1428571429  | 0.05555555556 | 0.05555555556 | 2.333333333  | 2.571428571  |
| BAZ2B   | 0             | 0             | 0.05555555556 | 0.05555555556 | 0            | 0            |
| BBC3    | 0.09523809524 | 0.09523809524 | 0.11111111111 | 0.11111111111 | 0.6842105263 | 0.8571428571 |
| BBIP1   | 0.1428571429  | 0.1428571429  | 0.05555555556 | 0.05555555556 | 2.333333333  | 2.571428571  |
| BBOF1   | 0.09523809524 | 0.09523809524 | 0             | 0             | inf          | 9.52381E+31  |
| BBS10   | 0.04761904762 | 0.04761904762 | 0.11111111111 | 0.11111111111 | 0.325        | 0.4285714286 |
| BBS12   | 0             | 0             | 0.05555555556 | 0.05555555556 | 0            | 0            |
| BBS2    | 0.04761904762 | 0.04761904762 | 0             | 0             | inf          | 4.7619E+31   |
| BBS4    | 0.04761904762 | 0.04761904762 | 0.05555555556 | 0.05555555556 | 0.7          | 0.8571428571 |
| BBS5    | 0             | 0             | 0.05555555556 | 0.05555555556 | 0            | 0            |
| BBS7    | 0             | 0             | 0.05555555556 | 0.05555555556 | 0            | 0            |
| BBS9    | 0.04761904762 | 0.04761904762 | 0.16666666667 | 0.16666666667 | 0.2          | 0.2857142857 |
| BBX     | 0.09523809524 | 0.09523809524 | 0.05555555556 | 0.05555555556 | 1.473684211  | 1.714285714  |
| BCAM    | 0.09523809524 | 0.09523809524 | 0.11111111111 | 0.11111111111 | 0.6842105263 | 0.8571428571 |
| BCAN    | 0.1428571429  | 0.1428571429  | 0.11111111111 | 0.11111111111 | 1.083333333  | 1.285714286  |
| BCAP29  | 0.04761904762 | 0.04761904762 | 0.05555555556 | 0.05555555556 | 0.7          | 0.8571428571 |
| BCAR1   | 0.04761904762 | 0.04761904762 | 0             | 0             | inf          | 4.7619E+31   |
| BCAR3   | 0.04761904762 | 0.04761904762 | 0.05555555556 | 0.05555555556 | 0.7          | 0.8571428571 |
| BCAR4   | 0.04761904762 | 0.04761904762 | 0             | 0             | inf          | 4.7619E+31   |
| BCAS1   | 0.09523809524 | 0.09523809524 | 0.11111111111 | 0.11111111111 | 0.6842105263 | 0.8571428571 |
| BCAS2   | 0.04761904762 | 0.04761904762 | 0.05555555556 | 0.05555555556 | 0.7          | 0.8571428571 |
| BCAS3   | 0.1428571429  | 0.1428571429  | 0             | 0             | inf          | 1.42857E+32  |
| BCAS4   | 0.09523809524 | 0.09523809524 | 0.16666666667 | 0.16666666667 | 0.4210526316 | 0.5714285714 |
| BCAT1   | 0.04761904762 | 0.04761904762 | 0.05555555556 | 0.05555555556 | 0.7          | 0.8571428571 |
| BCAT2   | 0.09523809524 | 0.09523809524 | 0.11111111111 | 0.11111111111 | 0.6842105263 | 0.8571428571 |

|         |               |               |               |               |              |              |
|---------|---------------|---------------|---------------|---------------|--------------|--------------|
| BCCIP   | 0.2380952381  | 0.2380952381  | 0.05555555556 | 0.05555555556 | 4.375        | 4.285714286  |
| CDIN3I  | 0.04761904762 | 0.04761904762 | 0.05555555556 | 0.05555555556 | 0.7          | 0.8571428571 |
| DIN3D-A | 0.04761904762 | 0.04761904762 | 0.05555555556 | 0.05555555556 | 0.7          | 0.8571428571 |
| BCHE    | 0.1428571429  | 0.1428571429  | 0.05555555556 | 0.05555555556 | 2.333333333  | 2.571428571  |
| BCKDH   | 0.04761904762 | 0.04761904762 | 0.05555555556 | 0.05555555556 | 0.7          | 0.8571428571 |
| BCKDK   | 0.04761904762 | 0.04761904762 | 0             | 0             | inf          | 4.7619E+31   |
| BCL10   | 0.04761904762 | 0.04761904762 | 0.05555555556 | 0.05555555556 | 0.7          | 0.8571428571 |
| BCL11A  | 0.04761904762 | 0.04761904762 | 0.05555555556 | 0.05555555556 | 0.7          | 0.8571428571 |
| BCL2    | 0.09523809524 | 0.09523809524 | 0             | 0             | inf          | 9.52381E+31  |
| BCL2A1  | 0.04761904762 | 0.04761904762 | 0.05555555556 | 0.05555555556 | 0.7          | 0.8571428571 |
| BCL2L1  | 0.09523809524 | 0.09523809524 | 0.1111111111  | 0.1111111111  | 0.6842105263 | 0.8571428571 |
| BCL2L10 | 0.04761904762 | 0.04761904762 | 0.05555555556 | 0.05555555556 | 0.7          | 0.8571428571 |
| BCL2L11 | 0             | 0             | 0.05555555556 | 0.05555555556 | 0            | 0            |
| BCL2L12 | 0.09523809524 | 0.09523809524 | 0.1111111111  | 0.1111111111  | 0.6842105263 | 0.8571428571 |
| BCL2L13 | 0.04761904762 | 0.04761904762 | 0             | 0             | inf          | 4.7619E+31   |
| BCL2L14 | 0.04761904762 | 0.04761904762 | 0.05555555556 | 0.05555555556 | 0.7          | 0.8571428571 |
| BCL2L15 | 0.04761904762 | 0.04761904762 | 0.05555555556 | 0.05555555556 | 0.7          | 0.8571428571 |
| BCL2L2  | 0             | 0             | 0.1111111111  | 0.1111111111  | 0            | 0            |
| 2L2-PAB | 0             | 0             | 0.1111111111  | 0.1111111111  | 0            | 0            |
| BCL3    | 0.09523809524 | 0.09523809524 | 0.1111111111  | 0.1111111111  | 0.6842105263 | 0.8571428571 |
| BCL6    | 0.09523809524 | 0.09523809524 | 0.1111111111  | 0.1111111111  | 0.6842105263 | 0.8571428571 |
| BCL6B   | 0             | 0             | 0.05555555556 | 0.05555555556 | 0            | 0            |
| BCL7A   | 0.04761904762 | 0.04761904762 | 0.1111111111  | 0.1111111111  | 0.325        | 0.4285714286 |
| BCL7B   | 0.1428571429  | 0.1428571429  | 0.1111111111  | 0.1111111111  | 1.083333333  | 1.285714286  |
| BCL7C   | 0.04761904762 | 0.04761904762 | 0             | 0             | inf          | 4.7619E+31   |
| BCL9    | 0.1428571429  | 0.1428571429  | 0.05555555556 | 0.05555555556 | 2.333333333  | 2.571428571  |
| BCO1    | 0.04761904762 | 0.04761904762 | 0             | 0             | inf          | 4.7619E+31   |
| BCR     | 0             | 0             | 0.05555555556 | 0.05555555556 | 0            | 0            |
| BCRP2   | 0.04761904762 | 0.04761904762 | 0.05555555556 | 0.05555555556 | 0.7          | 0.8571428571 |
| BCRP3   | 0.04761904762 | 0.04761904762 | 0.1111111111  | 0.1111111111  | 0.325        | 0.4285714286 |
| BCS1L   | 0             | 0             | 0.05555555556 | 0.05555555556 | 0            | 0            |
| BCYRN1  | 0             | 0             | 0.05555555556 | 0.05555555556 | 0            | 0            |
| BDH1    | 0.1428571429  | 0.1428571429  | 0.05555555556 | 0.05555555556 | 2.333333333  | 2.571428571  |
| BDH2    | 0             | 0             | 0.05555555556 | 0.05555555556 | 0            | 0            |
| BDP1    | 0.04761904762 | 0.04761904762 | 0             | 0             | inf          | 4.7619E+31   |
| BEAN1   | 0.04761904762 | 0.04761904762 | 0             | 0             | inf          | 4.7619E+31   |
| BEAN1-A | 0.04761904762 | 0.04761904762 | 0             | 0             | inf          | 4.7619E+31   |
| BECN1   | 0.04761904762 | 0.04761904762 | 0             | 0             | inf          | 4.7619E+31   |
| BECN2   | 0.1428571429  | 0.1428571429  | 0             | 0             | inf          | 1.42857E+32  |
| BEND3   | 0             | 0             | 0             | 0             |              | 0.00001      |
| BEND3P  | 0.1428571429  | 0.1428571429  | 0.05555555556 | 0.05555555556 | 2.333333333  | 2.571428571  |
| BEND4   | 0.04761904762 | 0.04761904762 | 0             | 0             | inf          | 4.7619E+31   |
| BEND5   | 0             | 0             | 0.05555555556 | 0.05555555556 | 0            | 0            |
| BEND6   | 0.04761904762 | 0.04761904762 | 0.05555555556 | 0.05555555556 | 0.7          | 0.8571428571 |
| BEND7   | 0.09523809524 | 0.09523809524 | 0.1111111111  | 0.1111111111  | 0.6842105263 | 0.8571428571 |
| BEST2   | 0.1428571429  | 0.1428571429  | 0.1111111111  | 0.1111111111  | 1.083333333  | 1.285714286  |
| BEST3   | 0.09523809524 | 0.09523809524 | 0.1111111111  | 0.1111111111  | 0.6842105263 | 0.8571428571 |
| BEST4   | 0.04761904762 | 0.04761904762 | 0.05555555556 | 0.05555555556 | 0.7          | 0.8571428571 |
| BET1    | 0.04761904762 | 0.04761904762 | 0.1111111111  | 0.1111111111  | 0.325        | 0.4285714286 |
| BET1L   | 0.04761904762 | 0.04761904762 | 0             | 0             | inf          | 4.7619E+31   |
| BFAR    | 0.04761904762 | 0.04761904762 | 0             | 0             | inf          | 4.7619E+31   |

|                |               |               |              |              |              |              |
|----------------|---------------|---------------|--------------|--------------|--------------|--------------|
| <b>BFSP1</b>   | 0.1904761905  | 0.1904761905  | 0.1111111111 | 0.1111111111 | 1.529411765  | 1.714285714  |
| <b>BFSP2</b>   | 0.1428571429  | 0.1428571429  | 0.0555555556 | 0.0555555556 | 2.333333333  | 2.571428571  |
| <b>FSP2-AS</b> | 0.1428571429  | 0.1428571429  | 0.0555555556 | 0.0555555556 | 2.333333333  | 2.571428571  |
| <b>HLHA1</b>   | 0.04761904762 | 0.04761904762 | 0.0555555556 | 0.0555555556 | 0.7          | 0.8571428571 |
| <b>BHLHA9</b>  | 0             | 0             | 0.1111111111 | 0.1111111111 | 0            | 0            |
| <b>HLHE2</b>   | 0.1428571429  | 0.1428571429  | 0.1666666667 | 0.1666666667 | 0.6666666667 | 0.8571428571 |
| <b>HLHE2</b>   | 0.1428571429  | 0.1428571429  | 0.2222222222 | 0.2222222222 | 0.4583333333 | 0.6428571429 |
| <b>HLHE4</b>   | 0.04761904762 | 0.04761904762 | 0            | 0            | inf          | 4.7619E+31   |
| <b>LHE40-2</b> | 0.04761904762 | 0.04761904762 | 0            | 0            | inf          | 4.7619E+31   |
| <b>HLHE4</b>   | 0.04761904762 | 0.04761904762 | 0.0555555556 | 0.0555555556 | 0.7          | 0.8571428571 |
| <b>BHMG1</b>   | 0.09523809524 | 0.09523809524 | 0.1111111111 | 0.1111111111 | 0.6842105263 | 0.8571428571 |
| <b>BHMT</b>    | 0.04761904762 | 0.04761904762 | 0            | 0            | inf          | 4.7619E+31   |
| <b>BHMT2</b>   | 0.04761904762 | 0.04761904762 | 0            | 0            | inf          | 4.7619E+31   |
| <b>BICC1</b>   | 0.09523809524 | 0.09523809524 | 0.0555555556 | 0.0555555556 | 1.473684211  | 1.714285714  |
| <b>BICD1</b>   | 0.1428571429  | 0.1428571429  | 0.1111111111 | 0.1111111111 | 1.083333333  | 1.285714286  |
| <b>BICD2</b>   | 0.04761904762 | 0.04761904762 | 0.0555555556 | 0.0555555556 | 0.7          | 0.8571428571 |
| <b>BICDL1</b>  | 0             | 0             | 0.1111111111 | 0.1111111111 | 0            | 0            |
| <b>BICDL2</b>  | 0.04761904762 | 0.04761904762 | 0.1111111111 | 0.1111111111 | 0.325        | 0.4285714286 |
| <b>BICRA</b>   | 0.09523809524 | 0.09523809524 | 0.1111111111 | 0.1111111111 | 0.6842105263 | 0.8571428571 |
| <b>BICRAL</b>  | 0.04761904762 | 0.04761904762 | 0.0555555556 | 0.0555555556 | 0.7          | 0.8571428571 |
| <b>BID</b>     | 0.04761904762 | 0.04761904762 | 0.0555555556 | 0.0555555556 | 0.7          | 0.8571428571 |
| <b>BIK</b>     | 0             | 0             | 0.1666666667 | 0.1666666667 | 0            | 0            |
| <b>BIN1</b>    | 0             | 0             | 0.0555555556 | 0.0555555556 | 0            | 0            |
| <b>BIN2</b>    | 0.09523809524 | 0.09523809524 | 0.0555555556 | 0.0555555556 | 1.473684211  | 1.714285714  |
| <b>BIN3</b>    | 0.09523809524 | 0.09523809524 | 0.1111111111 | 0.1111111111 | 0.6842105263 | 0.8571428571 |
| <b>BIN3-IT</b> | 0.09523809524 | 0.09523809524 | 0.1111111111 | 0.1111111111 | 0.6842105263 | 0.8571428571 |
| <b>BIRC5</b>   | 0.04761904762 | 0.04761904762 | 0            | 0            | inf          | 4.7619E+31   |
| <b>BIRC6</b>   | 0.1428571429  | 0.1428571429  | 0            | 0            | inf          | 1.42857E+32  |
| <b>IRC6-AS</b> | 0.1428571429  | 0.1428571429  | 0            | 0            | inf          | 1.42857E+32  |
| <b>BIRC7</b>   | 0.1428571429  | 0.1428571429  | 0.2222222222 | 0.2222222222 | 0.4583333333 | 0.6428571429 |
| <b>BIRC8</b>   | 0.09523809524 | 0.09523809524 | 0.0555555556 | 0.0555555556 | 1.473684211  | 1.714285714  |
| <b>BISPR</b>   | 0.1428571429  | 0.1428571429  | 0.1111111111 | 0.1111111111 | 1.083333333  | 1.285714286  |
| <b>LACAT</b>   | 0.1904761905  | 0.1904761905  | 0            | 0            | inf          | 1.90476E+32  |
| <b>BLACE</b>   | 0.1428571429  | 0.1428571429  | 0.0555555556 | 0.0555555556 | 2.333333333  | 2.571428571  |
| <b>BLCAP</b>   | 0.09523809524 | 0.09523809524 | 0.1666666667 | 0.1666666667 | 0.4210526316 | 0.5714285714 |
| <b>BLK</b>     | 0.09523809524 | 0.09523809524 | 0.1111111111 | 0.1111111111 | 0.6842105263 | 0.8571428571 |
| <b>BLM</b>     | 0.04761904762 | 0.04761904762 | 0.0555555556 | 0.0555555556 | 0.7          | 0.8571428571 |
| <b>BLMH</b>    | 0             | 0             | 0.0555555556 | 0.0555555556 | 0            | 0            |
| <b>BLNK</b>    | 0.1428571429  | 0.1428571429  | 0            | 0            | inf          | 1.42857E+32  |
| <b>BLOC1S</b>  | 0.04761904762 | 0.04761904762 | 0.0555555556 | 0.0555555556 | 0.7          | 0.8571428571 |
| <b>C1S1-R</b>  | 0.04761904762 | 0.04761904762 | 0.0555555556 | 0.0555555556 | 0.7          | 0.8571428571 |
| <b>BLOC1S</b>  | 0.1428571429  | 0.1428571429  | 0            | 0            | inf          | 1.42857E+32  |
| <b>BLOC1S</b>  | 0.09523809524 | 0.09523809524 | 0.1111111111 | 0.1111111111 | 0.6842105263 | 0.8571428571 |
| <b>BLOC1S</b>  | 0.04761904762 | 0.04761904762 | 0            | 0            | inf          | 4.7619E+31   |
| <b>BLVRA</b>   | 0.04761904762 | 0.04761904762 | 0.1666666667 | 0.1666666667 | 0.2          | 0.2857142857 |
| <b>BLVRB</b>   | 0.04761904762 | 0.04761904762 | 0.0555555556 | 0.0555555556 | 0.7          | 0.8571428571 |
| <b>BLZF1</b>   | 0.1428571429  | 0.1428571429  | 0            | 0            | inf          | 1.42857E+32  |
| <b>BMERB</b>   | 0.04761904762 | 0.04761904762 | 0            | 0            | inf          | 4.7619E+31   |
| <b>BMF</b>     | 0             | 0             | 0            | 0            |              | 0.00001      |
| <b>BMI1</b>    | 0.09523809524 | 0.09523809524 | 0.1111111111 | 0.1111111111 | 0.6842105263 | 0.8571428571 |
| <b>BMP1</b>    | 0.09523809524 | 0.09523809524 | 0.1111111111 | 0.1111111111 | 0.6842105263 | 0.8571428571 |

|         |               |               |               |               |               |              |
|---------|---------------|---------------|---------------|---------------|---------------|--------------|
| BMP10   | 0             | 0             | 0.05555555556 | 0.05555555556 | 0             | 0            |
| BMP2    | 0.1904761905  | 0.1904761905  | 0.11111111111 | 0.11111111111 | 1.529411765   | 1.714285714  |
| BMP2K   | 0.04761904762 | 0.04761904762 | 0.05555555556 | 0.05555555556 | 0.7           | 0.8571428571 |
| BMP3    | 0             | 0             | 0.05555555556 | 0.05555555556 | 0             | 0            |
| BMP4    | 0.04761904762 | 0.04761904762 | 0             | 0             | inf           | 4.7619E+31   |
| BMP5    | 0.04761904762 | 0.04761904762 | 0.05555555556 | 0.05555555556 | 0.7           | 0.8571428571 |
| BMP7    | 0.1428571429  | 0.1428571429  | 0.22222222222 | 0.22222222222 | 0.45833333333 | 0.6428571429 |
| MP7-AS  | 0.1428571429  | 0.1428571429  | 0.22222222222 | 0.22222222222 | 0.45833333333 | 0.6428571429 |
| BMP8A   | 0.04761904762 | 0.04761904762 | 0.05555555556 | 0.05555555556 | 0.7           | 0.8571428571 |
| BMP8B   | 0.04761904762 | 0.04761904762 | 0.05555555556 | 0.05555555556 | 0.7           | 0.8571428571 |
| BMPER   | 0.04761904762 | 0.04761904762 | 0.16666666667 | 0.16666666667 | 0.2           | 0.2857142857 |
| BMPR1A  | 0.1428571429  | 0.1428571429  | 0.05555555556 | 0.05555555556 | 2.33333333333 | 2.571428571  |
| BMPR1E  | 0             | 0             | 0.05555555556 | 0.05555555556 | 0             | 0            |
| IPR1B-I | 0             | 0             | 0.05555555556 | 0.05555555556 | 0             | 0            |
| BMPR2   | 0.09523809524 | 0.09523809524 | 0.05555555556 | 0.05555555556 | 1.473684211   | 1.714285714  |
| BMS1    | 0.1428571429  | 0.1428571429  | 0.05555555556 | 0.05555555556 | 2.33333333333 | 2.571428571  |
| BMS1P1  | 0.1428571429  | 0.1428571429  | 0.05555555556 | 0.05555555556 | 2.33333333333 | 2.571428571  |
| BMS1P1A | 0.09523809524 | 0.09523809524 | 0.22222222222 | 0.22222222222 | 0.2894736842  | 0.4285714286 |
| BMS1P17 | 0.1904761905  | 0.1904761905  | 0.11111111111 | 0.11111111111 | 1.529411765   | 1.714285714  |
| BMS1P18 | 0.1904761905  | 0.1904761905  | 0.11111111111 | 0.11111111111 | 1.529411765   | 1.714285714  |
| BMS1P2  | 0.1428571429  | 0.1428571429  | 0.05555555556 | 0.05555555556 | 2.33333333333 | 2.571428571  |
| IP2-AG  | 0.1428571429  | 0.1428571429  | 0.05555555556 | 0.05555555556 | 2.33333333333 | 2.571428571  |
| BMS1P20 | 0.04761904762 | 0.04761904762 | 0.05555555556 | 0.05555555556 | 0.7           | 0.8571428571 |
| BMS1P21 | 0.1428571429  | 0.1428571429  | 0             | 0             | inf           | 1.42857E+32  |
| BMS1P22 | 0.1904761905  | 0.1904761905  | 0.11111111111 | 0.11111111111 | 1.529411765   | 1.714285714  |
| IP4-AG  | 0.1904761905  | 0.1904761905  | 0.05555555556 | 0.05555555556 | 3.294117647   | 3.428571429  |
| BMT2    | 0.04761904762 | 0.04761904762 | 0.05555555556 | 0.05555555556 | 0.7           | 0.8571428571 |
| BNC1    | 0.04761904762 | 0.04761904762 | 0.05555555556 | 0.05555555556 | 0.7           | 0.8571428571 |
| BNC2    | 0.04761904762 | 0.04761904762 | 0.05555555556 | 0.05555555556 | 0.7           | 0.8571428571 |
| NC2-AS  | 0.04761904762 | 0.04761904762 | 0.05555555556 | 0.05555555556 | 0.7           | 0.8571428571 |
| BNIP1   | 0             | 0             | 0.05555555556 | 0.05555555556 | 0             | 0            |
| BNIP2   | 0.04761904762 | 0.04761904762 | 0.05555555556 | 0.05555555556 | 0.7           | 0.8571428571 |
| BNIP3   | 0.2380952381  | 0.2380952381  | 0             | 0             | inf           | 2.38095E+32  |
| BNIP3L  | 0.04761904762 | 0.04761904762 | 0.11111111111 | 0.11111111111 | 0.325         | 0.4285714286 |
| BNIPL   | 0.1904761905  | 0.1904761905  | 0.05555555556 | 0.05555555556 | 3.294117647   | 3.428571429  |
| BOC     | 0.09523809524 | 0.09523809524 | 0.05555555556 | 0.05555555556 | 1.473684211   | 1.714285714  |
| BOD1    | 0             | 0             | 0.05555555556 | 0.05555555556 | 0             | 0            |
| BOD1L1  | 0             | 0             | 0             | 0             |               | 0.00001      |
| BOD1L2  | 0.09523809524 | 0.09523809524 | 0             | 0             | inf           | 9.52381E+31  |
| BOK     | 0             | 0             | 0.05555555556 | 0.05555555556 | 0             | 0            |
| BOK-AS  | 0             | 0             | 0.05555555556 | 0.05555555556 | 0             | 0            |
| BOLA1   | 0.1428571429  | 0.1428571429  | 0.05555555556 | 0.05555555556 | 2.33333333333 | 2.571428571  |
| BOLA2   | 0.04761904762 | 0.04761904762 | 0             | 0             | inf           | 4.7619E+31   |
| A2-SMC  | 0.04761904762 | 0.04761904762 | 0             | 0             | inf           | 4.7619E+31   |
| BOLA2B  | 0.04761904762 | 0.04761904762 | 0             | 0             | inf           | 4.7619E+31   |
| BOLA3   | 0             | 0             | 0.05555555556 | 0.05555555556 | 0             | 0            |
| OLA3-AS | 0             | 0             | 0.05555555556 | 0.05555555556 | 0             | 0            |
| BOLL    | 0             | 0             | 0.05555555556 | 0.05555555556 | 0             | 0            |
| BOPI    | 0.04761904762 | 0.04761904762 | 0.16666666667 | 0.16666666667 | 0.2           | 0.2857142857 |
| BORCS5  | 0.04761904762 | 0.04761904762 | 0.05555555556 | 0.05555555556 | 0.7           | 0.8571428571 |
| BORCS6  | 0.04761904762 | 0.04761904762 | 0.05555555556 | 0.05555555556 | 0.7           | 0.8571428571 |

|                |               |               |              |              |              |              |
|----------------|---------------|---------------|--------------|--------------|--------------|--------------|
| <b>BORCS7</b>  | 0.1428571429  | 0.1428571429  | 0.0555555556 | 0.0555555556 | 2.333333333  | 2.571428571  |
| <b>RCS7-AS</b> | 0.1428571429  | 0.1428571429  | 0.0555555556 | 0.0555555556 | 2.333333333  | 2.571428571  |
| <b>BORCS8</b>  | 0.1428571429  | 0.1428571429  | 0.1111111111 | 0.1111111111 | 1.083333333  | 1.285714286  |
| <b>CS8-ME</b>  | 0.1428571429  | 0.1428571429  | 0.1111111111 | 0.1111111111 | 1.083333333  | 1.285714286  |
| <b>BPESC1</b>  | 0.1428571429  | 0.1428571429  | 0.0555555556 | 0.0555555556 | 2.333333333  | 2.571428571  |
| <b>BPGM</b>    | 0.04761904762 | 0.04761904762 | 0.0555555556 | 0.0555555556 | 0.7          | 0.8571428571 |
| <b>BPI</b>     | 0.1428571429  | 0.1428571429  | 0.1666666667 | 0.1666666667 | 0.6666666667 | 0.8571428571 |
| <b>BPIFA1</b>  | 0.09523809524 | 0.09523809524 | 0.1111111111 | 0.1111111111 | 0.6842105263 | 0.8571428571 |
| <b>BPIFA2</b>  | 0.09523809524 | 0.09523809524 | 0.1111111111 | 0.1111111111 | 0.6842105263 | 0.8571428571 |
| <b>BPIFA3</b>  | 0.09523809524 | 0.09523809524 | 0.1111111111 | 0.1111111111 | 0.6842105263 | 0.8571428571 |
| <b>BPIFA4</b>  | 0.09523809524 | 0.09523809524 | 0.1111111111 | 0.1111111111 | 0.6842105263 | 0.8571428571 |
| <b>BPIFB1</b>  | 0.09523809524 | 0.09523809524 | 0.1111111111 | 0.1111111111 | 0.6842105263 | 0.8571428571 |
| <b>BPIFB2</b>  | 0.09523809524 | 0.09523809524 | 0.1111111111 | 0.1111111111 | 0.6842105263 | 0.8571428571 |
| <b>BPIFB3</b>  | 0.09523809524 | 0.09523809524 | 0.1111111111 | 0.1111111111 | 0.6842105263 | 0.8571428571 |
| <b>BPIFB4</b>  | 0.09523809524 | 0.09523809524 | 0.1111111111 | 0.1111111111 | 0.6842105263 | 0.8571428571 |
| <b>BPIFB6</b>  | 0.09523809524 | 0.09523809524 | 0.1111111111 | 0.1111111111 | 0.6842105263 | 0.8571428571 |
| <b>BPIFC</b>   | 0.04761904762 | 0.04761904762 | 0.1111111111 | 0.1111111111 | 0.325        | 0.4285714286 |
| <b>BPNT1</b>   | 0.1428571429  | 0.1428571429  | 0.0555555556 | 0.0555555556 | 2.333333333  | 2.571428571  |
| <b>BPTF</b>    | 0             | 0             | 0            | 0            |              | 0.00001      |
| <b>BRAF</b>    | 0.04761904762 | 0.04761904762 | 0.1111111111 | 0.1111111111 | 0.325        | 0.4285714286 |
| <b>BRAP</b>    | 0             | 0             | 0.1111111111 | 0.1111111111 | 0            | 0            |
| <b>BRAT1</b>   | 0.04761904762 | 0.04761904762 | 0.1666666667 | 0.1666666667 | 0.2          | 0.2857142857 |
| <b>BRCA1</b>   | 0.04761904762 | 0.04761904762 | 0            | 0            | inf          | 4.7619E+31   |
| <b>BRD1</b>    | 0             | 0             | 0.1111111111 | 0.1111111111 | 0            | 0            |
| <b>BRD2</b>    | 0.04761904762 | 0.04761904762 | 0            | 0            | inf          | 4.7619E+31   |
| <b>BRD3</b>    | 0.04761904762 | 0.04761904762 | 0            | 0            | inf          | 4.7619E+31   |
| <b>BRD3OS</b>  | 0.04761904762 | 0.04761904762 | 0            | 0            | inf          | 4.7619E+31   |
| <b>BRD4</b>    | 0.1428571429  | 0.1428571429  | 0.1111111111 | 0.1111111111 | 1.083333333  | 1.285714286  |
| <b>BRD7</b>    | 0.04761904762 | 0.04761904762 | 0            | 0            | inf          | 4.7619E+31   |
| <b>BRD8</b>    | 0.04761904762 | 0.04761904762 | 0            | 0            | inf          | 4.7619E+31   |
| <b>BRD9</b>    | 0             | 0             | 0.0555555556 | 0.0555555556 | 0            | 0            |
| <b>BRDT</b>    | 0.04761904762 | 0.04761904762 | 0.0555555556 | 0.0555555556 | 0.7          | 0.8571428571 |
| <b>BREA2</b>   | 0.04761904762 | 0.04761904762 | 0.1666666667 | 0.1666666667 | 0.2          | 0.2857142857 |
| <b>BRF2</b>    | 0.04761904762 | 0.04761904762 | 0.1111111111 | 0.1111111111 | 0.325        | 0.4285714286 |
| <b>BRI3</b>    | 0.04761904762 | 0.04761904762 | 0.0555555556 | 0.0555555556 | 0.7          | 0.8571428571 |
| <b>BRI3BP</b>  | 0.04761904762 | 0.04761904762 | 0.0555555556 | 0.0555555556 | 0.7          | 0.8571428571 |
| <b>BRICD5</b>  | 0.09523809524 | 0.09523809524 | 0.2222222222 | 0.2222222222 | 0.2894736842 | 0.4285714286 |
| <b>BRINP1</b>  | 0.04761904762 | 0.04761904762 | 0            | 0            | inf          | 4.7619E+31   |
| <b>BRINP2</b>  | 0.1428571429  | 0.1428571429  | 0            | 0            | inf          | 1.42857E+32  |
| <b>BRINP3</b>  | 0.1428571429  | 0.1428571429  | 0            | 0            | inf          | 1.42857E+32  |
| <b>BRIP1</b>   | 0.09523809524 | 0.09523809524 | 0            | 0            | inf          | 9.52381E+31  |
| <b>BRIX1</b>   | 0.04761904762 | 0.04761904762 | 0.0555555556 | 0.0555555556 | 0.7          | 0.8571428571 |
| <b>BRK1</b>    | 0.09523809524 | 0.09523809524 | 0            | 0            | inf          | 9.52381E+31  |
| <b>BRMS1</b>   | 0.09523809524 | 0.09523809524 | 0            | 0            | inf          | 9.52381E+31  |
| <b>BROX</b>    | 0.1428571429  | 0.1428571429  | 0.0555555556 | 0.0555555556 | 2.333333333  | 2.571428571  |
| <b>BRPF1</b>   | 0.09523809524 | 0.09523809524 | 0            | 0            | inf          | 9.52381E+31  |
| <b>BRPF3</b>   | 0.04761904762 | 0.04761904762 | 0.0555555556 | 0.0555555556 | 0.7          | 0.8571428571 |
| <b>BRSK1</b>   | 0.09523809524 | 0.09523809524 | 0.0555555556 | 0.0555555556 | 1.473684211  | 1.714285714  |
| <b>BRSK2</b>   | 0.04761904762 | 0.04761904762 | 0            | 0            | inf          | 4.7619E+31   |
| <b>BRWD1</b>   | 0.04761904762 | 0.04761904762 | 0.1111111111 | 0.1111111111 | 0.325        | 0.4285714286 |
| <b>RWD1-A</b>  | 0.04761904762 | 0.04761904762 | 0.1111111111 | 0.1111111111 | 0.325        | 0.4285714286 |

|                 |               |               |               |               |              |              |
|-----------------|---------------|---------------|---------------|---------------|--------------|--------------|
| <b>RWD1-A</b>   | 0.04761904762 | 0.04761904762 | 0.1111111111  | 0.1111111111  | 0.325        | 0.4285714286 |
| <b>BSDC1</b>    | 0.04761904762 | 0.04761904762 | 0.1111111111  | 0.1111111111  | 0.325        | 0.4285714286 |
| <b>BSG</b>      | 0.09523809524 | 0.09523809524 | 0.1111111111  | 0.1111111111  | 0.6842105263 | 0.8571428571 |
| <b>BSN</b>      | 0.09523809524 | 0.09523809524 | 0             | 0             | inf          | 9.52381E+31  |
| <b>BSN-DT</b>   | 0.09523809524 | 0.09523809524 | 0             | 0             | inf          | 9.52381E+31  |
| <b>BSND</b>     | 0.04761904762 | 0.04761904762 | 0.05555555556 | 0.05555555556 | 0.7          | 0.8571428571 |
| <b>BSPH1</b>    | 0.09523809524 | 0.09523809524 | 0.1111111111  | 0.1111111111  | 0.6842105263 | 0.8571428571 |
| <b>BSPRY</b>    | 0.04761904762 | 0.04761904762 | 0.05555555556 | 0.05555555556 | 0.7          | 0.8571428571 |
| <b>BST1</b>     | 0             | 0             | 0             | 0             |              | 0.00001      |
| <b>BST2</b>     | 0.1428571429  | 0.1428571429  | 0.1111111111  | 0.1111111111  | 1.083333333  | 1.285714286  |
| <b>BTAf1</b>    | 0.1428571429  | 0.1428571429  | 0.1111111111  | 0.1111111111  | 1.083333333  | 1.285714286  |
| <b>BTBD1</b>    | 0.04761904762 | 0.04761904762 | 0.05555555556 | 0.05555555556 | 0.7          | 0.8571428571 |
| <b>BTBD11</b>   | 0.04761904762 | 0.04761904762 | 0.05555555556 | 0.05555555556 | 0.7          | 0.8571428571 |
| <b>BTBD16</b>   | 0.1904761905  | 0.1904761905  | 0.05555555556 | 0.05555555556 | 3.294117647  | 3.428571429  |
| <b>BTBD17</b>   | 0.04761904762 | 0.04761904762 | 0             | 0             | inf          | 4.7619E+31   |
| <b>BTBD19</b>   | 0.04761904762 | 0.04761904762 | 0.05555555556 | 0.05555555556 | 0.7          | 0.8571428571 |
| <b>BTBD2</b>    | 0.09523809524 | 0.09523809524 | 0.1111111111  | 0.1111111111  | 0.6842105263 | 0.8571428571 |
| <b>BTBD3</b>    | 0.1904761905  | 0.1904761905  | 0.1111111111  | 0.1111111111  | 1.529411765  | 1.714285714  |
| <b>BTBD8</b>    | 0.04761904762 | 0.04761904762 | 0.05555555556 | 0.05555555556 | 0.7          | 0.8571428571 |
| <b>BTBD9</b>    | 0.04761904762 | 0.04761904762 | 0.05555555556 | 0.05555555556 | 0.7          | 0.8571428571 |
| <b>BTBD9-AS</b> | 0.04761904762 | 0.04761904762 | 0.05555555556 | 0.05555555556 | 0.7          | 0.8571428571 |
| <b>BTC</b>      | 0.09523809524 | 0.09523809524 | 0.05555555556 | 0.05555555556 | 1.473684211  | 1.714285714  |
| <b>BTD</b>      | 0.04761904762 | 0.04761904762 | 0             | 0             | inf          | 4.7619E+31   |
| <b>BTF3</b>     | 0             | 0             | 0.05555555556 | 0.05555555556 | 0            | 0            |
| <b>BTF3L4</b>   | 0.04761904762 | 0.04761904762 | 0.05555555556 | 0.05555555556 | 0.7          | 0.8571428571 |
| <b>BTF3P11</b>  | 0             | 0             | 0.05555555556 | 0.05555555556 | 0            | 0            |
| <b>BTG1</b>     | 0.04761904762 | 0.04761904762 | 0.05555555556 | 0.05555555556 | 0.7          | 0.8571428571 |
| <b>BTG2</b>     | 0.1428571429  | 0.1428571429  | 0             | 0             | inf          | 1.42857E+32  |
| <b>BTG3</b>     | 0.04761904762 | 0.04761904762 | 0.1111111111  | 0.1111111111  | 0.325        | 0.4285714286 |
| <b>TG3-AS</b>   | 0.04761904762 | 0.04761904762 | 0.1111111111  | 0.1111111111  | 0.325        | 0.4285714286 |
| <b>BTLA</b>     | 0.09523809524 | 0.09523809524 | 0.05555555556 | 0.05555555556 | 1.473684211  | 1.714285714  |
| <b>BTN1A1</b>   | 0             | 0             | 0.05555555556 | 0.05555555556 | 0            | 0            |
| <b>BTN2A1</b>   | 0             | 0             | 0.05555555556 | 0.05555555556 | 0            | 0            |
| <b>BTN2A2</b>   | 0             | 0             | 0.05555555556 | 0.05555555556 | 0            | 0            |
| <b>BTN2A3</b>   | 0             | 0             | 0.05555555556 | 0.05555555556 | 0            | 0            |
| <b>BTN3A1</b>   | 0             | 0             | 0.05555555556 | 0.05555555556 | 0            | 0            |
| <b>BTN3A2</b>   | 0             | 0             | 0.05555555556 | 0.05555555556 | 0            | 0            |
| <b>BTN3A3</b>   | 0             | 0             | 0.05555555556 | 0.05555555556 | 0            | 0            |
| <b>BTNL10</b>   | 0.1428571429  | 0.1428571429  | 0             | 0             | inf          | 1.42857E+32  |
| <b>BTNL2</b>    | 0.04761904762 | 0.04761904762 | 0             | 0             | inf          | 4.7619E+31   |
| <b>BTNL3</b>    | 0.09523809524 | 0.09523809524 | 0.05555555556 | 0.05555555556 | 1.473684211  | 1.714285714  |
| <b>BTNL8</b>    | 0.09523809524 | 0.09523809524 | 0.05555555556 | 0.05555555556 | 1.473684211  | 1.714285714  |
| <b>BTNL9</b>    | 0.09523809524 | 0.09523809524 | 0.05555555556 | 0.05555555556 | 1.473684211  | 1.714285714  |
| <b>BTRC</b>     | 0.1428571429  | 0.1428571429  | 0             | 0             | inf          | 1.42857E+32  |
| <b>BUB1</b>     | 0             | 0             | 0.05555555556 | 0.05555555556 | 0            | 0            |
| <b>BUB3</b>     | 0.2380952381  | 0.2380952381  | 0.05555555556 | 0.05555555556 | 4.375        | 4.285714286  |
| <b>BUD23</b>    | 0.1428571429  | 0.1428571429  | 0.1111111111  | 0.1111111111  | 1.083333333  | 1.285714286  |
| <b>BUD31</b>    | 0.04761904762 | 0.04761904762 | 0.05555555556 | 0.05555555556 | 0.7          | 0.8571428571 |
| <b>BYSL</b>     | 0.04761904762 | 0.04761904762 | 0.05555555556 | 0.05555555556 | 0.7          | 0.8571428571 |
| <b>BZW1</b>     | 0             | 0             | 0.05555555556 | 0.05555555556 | 0            | 0            |
| <b>BZW2</b>     | 0.04761904762 | 0.04761904762 | 0.2222222222  | 0.2222222222  | 0.1375       | 0.2142857143 |



|            |               |               |              |              |              |              |
|------------|---------------|---------------|--------------|--------------|--------------|--------------|
| C10orf10   | 0.09523809524 | 0.09523809524 | 0            | 0            | inf          | 9.52381E+31  |
| C10orf11   | 0.09523809524 | 0.09523809524 | 0.1111111111 | 0.1111111111 | 0.6842105263 | 0.8571428571 |
| C10orf12   | 0.2380952381  | 0.2380952381  | 0.0555555556 | 0.0555555556 | 4.375        | 4.285714286  |
| C10orf12   | 0.09523809524 | 0.09523809524 | 0.1111111111 | 0.1111111111 | 0.6842105263 | 0.8571428571 |
| C10orf14   | 0.1428571429  | 0.1428571429  | 0.0555555556 | 0.0555555556 | 2.333333333  | 2.571428571  |
| C10orf14   | 0.3333333333  | 0.3333333333  | 0            | 0            | inf          | 3.33333E+32  |
| C10orf25   | 0.1428571429  | 0.1428571429  | 0.0555555556 | 0.0555555556 | 2.333333333  | 2.571428571  |
| C10orf53   | 0.09523809524 | 0.09523809524 | 0.0555555556 | 0.0555555556 | 1.473684211  | 1.714285714  |
| C10orf55   | 0.1904761905  | 0.1904761905  | 0.0555555556 | 0.0555555556 | 3.294117647  | 3.428571429  |
| C10orf62   | 0.1428571429  | 0.1428571429  | 0            | 0            | inf          | 1.42857E+32  |
| C10orf67   | 0.09523809524 | 0.09523809524 | 0.1111111111 | 0.1111111111 | 0.6842105263 | 0.8571428571 |
| C10orf71   | 0.09523809524 | 0.09523809524 | 0.0555555556 | 0.0555555556 | 1.473684211  | 1.714285714  |
| C10orf71-A | 0.09523809524 | 0.09523809524 | 0.0555555556 | 0.0555555556 | 1.473684211  | 1.714285714  |
| C10orf82   | 0.2380952381  | 0.2380952381  | 0            | 0            | inf          | 2.38095E+32  |
| C10orf88   | 0.2380952381  | 0.2380952381  | 0.0555555556 | 0.0555555556 | 4.375        | 4.285714286  |
| C10orf90   | 0.2380952381  | 0.2380952381  | 0.0555555556 | 0.0555555556 | 4.375        | 4.285714286  |
| C10orf91   | 0.2380952381  | 0.2380952381  | 0            | 0            | inf          | 2.38095E+32  |
| C10orf95   | 0.1428571429  | 0.1428571429  | 0.0555555556 | 0.0555555556 | 2.333333333  | 2.571428571  |
| C10orf99   | 0.1428571429  | 0.1428571429  | 0            | 0            | inf          | 1.42857E+32  |
| C11orf21   | 0.04761904762 | 0.04761904762 | 0            | 0            | inf          | 4.7619E+31   |
| C11orf42   | 0.04761904762 | 0.04761904762 | 0            | 0            | inf          | 4.7619E+31   |
| C11orf49   | 0             | 0             | 0.0555555556 | 0.0555555556 | 0            | 0            |
| C12orf10   | 0.04761904762 | 0.04761904762 | 0.0555555556 | 0.0555555556 | 0.7          | 0.8571428571 |
| C12orf29   | 0.04761904762 | 0.04761904762 | 0.0555555556 | 0.0555555556 | 0.7          | 0.8571428571 |
| C12orf4    | 0.04761904762 | 0.04761904762 | 0.1111111111 | 0.1111111111 | 0.325        | 0.4285714286 |
| C12orf40   | 0.04761904762 | 0.04761904762 | 0.0555555556 | 0.0555555556 | 0.7          | 0.8571428571 |
| C12orf42   | 0.04761904762 | 0.04761904762 | 0.0555555556 | 0.0555555556 | 0.7          | 0.8571428571 |
| C12orf43   | 0.04761904762 | 0.04761904762 | 0.1111111111 | 0.1111111111 | 0.325        | 0.4285714286 |
| C12orf45   | 0.04761904762 | 0.04761904762 | 0.0555555556 | 0.0555555556 | 0.7          | 0.8571428571 |
| C12orf49   | 0             | 0             | 0.0555555556 | 0.0555555556 | 0            | 0            |
| C12orf50   | 0.04761904762 | 0.04761904762 | 0.0555555556 | 0.0555555556 | 0.7          | 0.8571428571 |
| C12orf54   | 0.04761904762 | 0.04761904762 | 0.0555555556 | 0.0555555556 | 0.7          | 0.8571428571 |
| C12orf56   | 0.1428571429  | 0.1428571429  | 0.0555555556 | 0.0555555556 | 2.333333333  | 2.571428571  |
| C12orf57   | 0.04761904762 | 0.04761904762 | 0.1111111111 | 0.1111111111 | 0.325        | 0.4285714286 |
| C12orf60   | 0.04761904762 | 0.04761904762 | 0.1111111111 | 0.1111111111 | 0.325        | 0.4285714286 |
| C12orf65   | 0.04761904762 | 0.04761904762 | 0.1111111111 | 0.1111111111 | 0.325        | 0.4285714286 |
| C12orf66   | 0.1428571429  | 0.1428571429  | 0.0555555556 | 0.0555555556 | 2.333333333  | 2.571428571  |
| C12orf71   | 0.04761904762 | 0.04761904762 | 0.0555555556 | 0.0555555556 | 0.7          | 0.8571428571 |
| C12orf73   | 0.04761904762 | 0.04761904762 | 0.0555555556 | 0.0555555556 | 0.7          | 0.8571428571 |
| C12orf74   | 0.04761904762 | 0.04761904762 | 0.0555555556 | 0.0555555556 | 0.7          | 0.8571428571 |
| C12orf75   | 0.04761904762 | 0.04761904762 | 0.0555555556 | 0.0555555556 | 0.7          | 0.8571428571 |
| C12orf76   | 0             | 0             | 0.1111111111 | 0.1111111111 | 0            | 0            |
| C12orf77   | 0.04761904762 | 0.04761904762 | 0.0555555556 | 0.0555555556 | 0.7          | 0.8571428571 |
| C12orf80   | 0.04761904762 | 0.04761904762 | 0.0555555556 | 0.0555555556 | 0.7          | 0.8571428571 |
| C14orf11   | 0             | 0             | 0.0555555556 | 0.0555555556 | 0            | 0            |
| C14orf28   | 0.04761904762 | 0.04761904762 | 0            | 0            | inf          | 4.7619E+31   |
| C14orf93   | 0             | 0             | 0.0555555556 | 0.0555555556 | 0            | 0            |
| C15orf32   | 0.04761904762 | 0.04761904762 | 0.0555555556 | 0.0555555556 | 0.7          | 0.8571428571 |
| C15orf39   | 0.04761904762 | 0.04761904762 | 0.0555555556 | 0.0555555556 | 0.7          | 0.8571428571 |
| C15orf40   | 0.04761904762 | 0.04761904762 | 0.0555555556 | 0.0555555556 | 0.7          | 0.8571428571 |
| C15orf41   | 0             | 0             | 0            | 0            |              | 0.00001      |

|          |               |               |               |               |              |              |
|----------|---------------|---------------|---------------|---------------|--------------|--------------|
| C15orf48 | 0.04761904762 | 0.04761904762 | 0             | 0             | inf          | 4.7619E+31   |
| C15orf54 | 0             | 0             | 0             | 0             |              | 0.00001      |
| C15orf61 | 0.04761904762 | 0.04761904762 | 0.05555555556 | 0.05555555556 | 0.7          | 0.8571428571 |
| C15orf65 | 0.04761904762 | 0.04761904762 | 0.05555555556 | 0.05555555556 | 0.7          | 0.8571428571 |
| C16orf46 | 0.09523809524 | 0.09523809524 | 0             | 0             | inf          | 9.52381E+31  |
| C16orf47 | 0.04761904762 | 0.04761904762 | 0             | 0             | inf          | 4.7619E+31   |
| C16orf54 | 0.04761904762 | 0.04761904762 | 0             | 0             | inf          | 4.7619E+31   |
| C16orf58 | 0.04761904762 | 0.04761904762 | 0             | 0             | inf          | 4.7619E+31   |
| C16orf70 | 0.1428571429  | 0.1428571429  | 0.05555555556 | 0.05555555556 | 2.333333333  | 2.571428571  |
| C16orf71 | 0.04761904762 | 0.04761904762 | 0             | 0             | inf          | 4.7619E+31   |
| C16orf72 | 0.09523809524 | 0.09523809524 | 0             | 0             | inf          | 9.52381E+31  |
| C16orf74 | 0.04761904762 | 0.04761904762 | 0             | 0             | inf          | 4.7619E+31   |
| C16orf78 | 0.04761904762 | 0.04761904762 | 0             | 0             | inf          | 4.7619E+31   |
| C16orf82 | 0.04761904762 | 0.04761904762 | 0             | 0             | inf          | 4.7619E+31   |
| C16orf86 | 0.1428571429  | 0.1428571429  | 0.05555555556 | 0.05555555556 | 2.333333333  | 2.571428571  |
| C16orf87 | 0.04761904762 | 0.04761904762 | 0             | 0             | inf          | 4.7619E+31   |
| C16orf89 | 0.04761904762 | 0.04761904762 | 0             | 0             | inf          | 4.7619E+31   |
| C16orf90 | 0.04761904762 | 0.04761904762 | 0.1111111111  | 0.1111111111  | 0.325        | 0.4285714286 |
| C16orf91 | 0.09523809524 | 0.09523809524 | 0.2222222222  | 0.2222222222  | 0.2894736842 | 0.4285714286 |
| C16orf92 | 0.04761904762 | 0.04761904762 | 0             | 0             | inf          | 4.7619E+31   |
| C16orf95 | 0.04761904762 | 0.04761904762 | 0             | 0             | inf          | 4.7619E+31   |
| C16orf96 | 0.04761904762 | 0.04761904762 | 0             | 0             | inf          | 4.7619E+31   |
| C16orf97 | 0.04761904762 | 0.04761904762 | 0             | 0             | inf          | 4.7619E+31   |
| C17orf10 | 0             | 0             | 0.05555555556 | 0.05555555556 | 0            | 0            |
| C17orf10 | 0.04761904762 | 0.04761904762 | 0             | 0             | inf          | 4.7619E+31   |
| C17orf10 | 0             | 0             | 0.1111111111  | 0.1111111111  | 0            | 0            |
| C17orf11 | 0.04761904762 | 0.04761904762 | 0             | 0             | inf          | 4.7619E+31   |
| C17orf11 | 0.09523809524 | 0.09523809524 | 0             | 0             | inf          | 9.52381E+31  |
| C17orf49 | 0             | 0             | 0.05555555556 | 0.05555555556 | 0            | 0            |
| C17orf50 | 0.09523809524 | 0.09523809524 | 0             | 0             | inf          | 9.52381E+31  |
| C17orf51 | 0.09523809524 | 0.09523809524 | 0.05555555556 | 0.05555555556 | 1.473684211  | 1.714285714  |
| C17orf53 | 0.09523809524 | 0.09523809524 | 0             | 0             | inf          | 9.52381E+31  |
| C17orf58 | 0             | 0             | 0             | 0             |              | 0.00001      |
| C17orf64 | 0.1428571429  | 0.1428571429  | 0             | 0             | inf          | 1.42857E+32  |
| C17orf67 | 0.09523809524 | 0.09523809524 | 0             | 0             | inf          | 9.52381E+31  |
| C17orf75 | 0             | 0             | 0             | 0             |              | 0.00001      |
| C17orf77 | 0.04761904762 | 0.04761904762 | 0             | 0             | inf          | 4.7619E+31   |
| C17orf80 | 0.04761904762 | 0.04761904762 | 0             | 0             | inf          | 4.7619E+31   |
| C17orf82 | 0.09523809524 | 0.09523809524 | 0             | 0             | inf          | 9.52381E+31  |
| C17orf97 | 0             | 0             | 0.1111111111  | 0.1111111111  | 0            | 0            |
| C17orf98 | 0.09523809524 | 0.09523809524 | 0             | 0             | inf          | 9.52381E+31  |
| C17orf99 | 0.04761904762 | 0.04761904762 | 0             | 0             | inf          | 4.7619E+31   |
| C18orf12 | 0.04761904762 | 0.04761904762 | 0.05555555556 | 0.05555555556 | 0.7          | 0.8571428571 |
| C18orf15 | 0.09523809524 | 0.09523809524 | 0.05555555556 | 0.05555555556 | 1.473684211  | 1.714285714  |
| C18orf21 | 0.04761904762 | 0.04761904762 | 0             | 0             | inf          | 4.7619E+31   |
| C18orf25 | 0.04761904762 | 0.04761904762 | 0.05555555556 | 0.05555555556 | 0.7          | 0.8571428571 |
| C18orf32 | 0.04761904762 | 0.04761904762 | 0             | 0             | inf          | 4.7619E+31   |
| C18orf54 | 0.09523809524 | 0.09523809524 | 0             | 0             | inf          | 9.52381E+31  |
| C18orf61 | 0.09523809524 | 0.09523809524 | 0.05555555556 | 0.05555555556 | 1.473684211  | 1.714285714  |
| C18orf65 | 0.09523809524 | 0.09523809524 | 0.05555555556 | 0.05555555556 | 1.473684211  | 1.714285714  |
| C19orf12 | 0.04761904762 | 0.04761904762 | 0.1666666667  | 0.1666666667  | 0.2          | 0.2857142857 |

|          |               |               |              |              |              |              |
|----------|---------------|---------------|--------------|--------------|--------------|--------------|
| C19orf18 | 0.1428571429  | 0.1428571429  | 0.0555555556 | 0.0555555556 | 2.333333333  | 2.571428571  |
| C19orf24 | 0.09523809524 | 0.09523809524 | 0.1111111111 | 0.1111111111 | 0.6842105263 | 0.8571428571 |
| C19orf25 | 0.09523809524 | 0.09523809524 | 0.1111111111 | 0.1111111111 | 0.6842105263 | 0.8571428571 |
| C19orf33 | 0.04761904762 | 0.04761904762 | 0.0555555556 | 0.0555555556 | 0.7          | 0.8571428571 |
| C19orf38 | 0.1428571429  | 0.1428571429  | 0.1111111111 | 0.1111111111 | 1.083333333  | 1.285714286  |
| C19orf44 | 0.1428571429  | 0.1428571429  | 0.1111111111 | 0.1111111111 | 1.083333333  | 1.285714286  |
| C19orf47 | 0.04761904762 | 0.04761904762 | 0.0555555556 | 0.0555555556 | 0.7          | 0.8571428571 |
| C19orf48 | 0.09523809524 | 0.09523809524 | 0.0555555556 | 0.0555555556 | 1.473684211  | 1.714285714  |
| C19orf53 | 0.1428571429  | 0.1428571429  | 0.1111111111 | 0.1111111111 | 1.083333333  | 1.285714286  |
| C19orf57 | 0.1428571429  | 0.1428571429  | 0.1111111111 | 0.1111111111 | 1.083333333  | 1.285714286  |
| C19orf66 | 0.1428571429  | 0.1428571429  | 0.1111111111 | 0.1111111111 | 1.083333333  | 1.285714286  |
| C19orf67 | 0.1428571429  | 0.1428571429  | 0.1111111111 | 0.1111111111 | 1.083333333  | 1.285714286  |
| C19orf71 | 0.09523809524 | 0.09523809524 | 0.0555555556 | 0.0555555556 | 1.473684211  | 1.714285714  |
| C19orf73 | 0.09523809524 | 0.09523809524 | 0.1111111111 | 0.1111111111 | 0.6842105263 | 0.8571428571 |
| C19orf81 | 0.09523809524 | 0.09523809524 | 0.0555555556 | 0.0555555556 | 1.473684211  | 1.714285714  |
| C1D      | 0             | 0             | 0.0555555556 | 0.0555555556 | 0            | 0            |
| G1GALT   | 0.04761904762 | 0.04761904762 | 0.1666666667 | 0.1666666667 | 0.2          | 0.2857142857 |
| GALT1C   | 0             | 0             | 0.0555555556 | 0.0555555556 | 0            | 0            |
| C1QA     | 0.04761904762 | 0.04761904762 | 0.1111111111 | 0.1111111111 | 0.325        | 0.4285714286 |
| C1QB     | 0.04761904762 | 0.04761904762 | 0.1111111111 | 0.1111111111 | 0.325        | 0.4285714286 |
| C1QBP    | 0             | 0             | 0.0555555556 | 0.0555555556 | 0            | 0            |
| C1QC     | 0.04761904762 | 0.04761904762 | 0.1111111111 | 0.1111111111 | 0.325        | 0.4285714286 |
| C1QL1    | 0.1428571429  | 0.1428571429  | 0            | 0            | inf          | 1.42857E+32  |
| C1QL2    | 0             | 0             | 0.0555555556 | 0.0555555556 | 0            | 0            |
| C1QL3    | 0.09523809524 | 0.09523809524 | 0.1111111111 | 0.1111111111 | 0.6842105263 | 0.8571428571 |
| C1QL4    | 0.04761904762 | 0.04761904762 | 0.0555555556 | 0.0555555556 | 0.7          | 0.8571428571 |
| I1QTNF   | 0.04761904762 | 0.04761904762 | 0            | 0            | inf          | 4.7619E+31   |
| QTNF1-A  | 0.04761904762 | 0.04761904762 | 0            | 0            | inf          | 4.7619E+31   |
| I1QTNF1  | 0             | 0             | 0.1111111111 | 0.1111111111 | 0            | 0            |
| I1QTNF   | 0.04761904762 | 0.04761904762 | 0.0555555556 | 0.0555555556 | 0.7          | 0.8571428571 |
| I1QTNF   | 0.04761904762 | 0.04761904762 | 0.1111111111 | 0.1111111111 | 0.325        | 0.4285714286 |
| NF3-AM   | 0.04761904762 | 0.04761904762 | 0.1111111111 | 0.1111111111 | 0.325        | 0.4285714286 |
| I1QTNF   | 0             | 0             | 0.0555555556 | 0.0555555556 | 0            | 0            |
| I1QTNF   | 0             | 0             | 0.1111111111 | 0.1111111111 | 0            | 0            |
| I1QTNF   | 0             | 0             | 0            | 0            |              | 0.00001      |
| I1QTNF   | 0.04761904762 | 0.04761904762 | 0.2222222222 | 0.2222222222 | 0.1375       | 0.2142857143 |
| C1R      | 0.04761904762 | 0.04761904762 | 0.1111111111 | 0.1111111111 | 0.325        | 0.4285714286 |
| C1RL     | 0.04761904762 | 0.04761904762 | 0.1111111111 | 0.1111111111 | 0.325        | 0.4285714286 |
| IRL-AS   | 0.04761904762 | 0.04761904762 | 0.1111111111 | 0.1111111111 | 0.325        | 0.4285714286 |
| C1S      | 0.04761904762 | 0.04761904762 | 0.1111111111 | 0.1111111111 | 0.325        | 0.4285714286 |
| C1orf100 | 0.1428571429  | 0.1428571429  | 0.0555555556 | 0.0555555556 | 2.333333333  | 2.571428571  |
| C1orf105 | 0.1428571429  | 0.1428571429  | 0.0555555556 | 0.0555555556 | 2.333333333  | 2.571428571  |
| C1orf109 | 0.04761904762 | 0.04761904762 | 0.0555555556 | 0.0555555556 | 0.7          | 0.8571428571 |
| C1orf112 | 0.1428571429  | 0.1428571429  | 0.0555555556 | 0.0555555556 | 2.333333333  | 2.571428571  |
| C1orf115 | 0.1428571429  | 0.1428571429  | 0.0555555556 | 0.0555555556 | 2.333333333  | 2.571428571  |
| C1orf116 | 0.1428571429  | 0.1428571429  | 0            | 0            | inf          | 1.42857E+32  |
| C1orf122 | 0.04761904762 | 0.04761904762 | 0.0555555556 | 0.0555555556 | 0.7          | 0.8571428571 |
| C1orf127 | 0.04761904762 | 0.04761904762 | 0.1111111111 | 0.1111111111 | 0.325        | 0.4285714286 |
| C1orf131 | 0.1428571429  | 0.1428571429  | 0            | 0            | inf          | 1.42857E+32  |
| C1orf137 | 0.04761904762 | 0.04761904762 | 0.0555555556 | 0.0555555556 | 0.7          | 0.8571428571 |
| C1orf140 | 0.1904761905  | 0.1904761905  | 0.0555555556 | 0.0555555556 | 3.294117647  | 3.428571429  |

|          |               |               |               |               |              |              |
|----------|---------------|---------------|---------------|---------------|--------------|--------------|
| C1orf141 | 0.04761904762 | 0.04761904762 | 0.05555555556 | 0.05555555556 | 0.7          | 0.8571428571 |
| C1orf143 | 0.1428571429  | 0.1428571429  | 0.05555555556 | 0.05555555556 | 2.333333333  | 2.571428571  |
| C1orf158 | 0.04761904762 | 0.04761904762 | 0.1111111111  | 0.1111111111  | 0.325        | 0.4285714286 |
| C1orf159 | 0             | 0             | 0.1111111111  | 0.1111111111  | 0            | 0            |
| C1orf162 | 0.04761904762 | 0.04761904762 | 0             | 0             | inf          | 4.7619E+31   |
| C1orf167 | 0.04761904762 | 0.04761904762 | 0.1111111111  | 0.1111111111  | 0.325        | 0.4285714286 |
| C1orf174 | 0             | 0             | 0             | 0             |              | 0.00001      |
| C1orf185 | 0.04761904762 | 0.04761904762 | 0.05555555556 | 0.05555555556 | 0.7          | 0.8571428571 |
| C1orf189 | 0.1904761905  | 0.1904761905  | 0.05555555556 | 0.05555555556 | 3.294117647  | 3.428571429  |
| C1orf194 | 0.04761904762 | 0.04761904762 | 0.05555555556 | 0.05555555556 | 0.7          | 0.8571428571 |
| C1orf195 | 0.04761904762 | 0.04761904762 | 0.1111111111  | 0.1111111111  | 0.325        | 0.4285714286 |
| C1orf198 | 0.1428571429  | 0.1428571429  | 0             | 0             | inf          | 1.42857E+32  |
| C1orf21  | 0.1428571429  | 0.1428571429  | 0             | 0             | inf          | 1.42857E+32  |
| C1orf210 | 0.04761904762 | 0.04761904762 | 0.05555555556 | 0.05555555556 | 0.7          | 0.8571428571 |
| C1orf216 | 0.04761904762 | 0.04761904762 | 0.05555555556 | 0.05555555556 | 0.7          | 0.8571428571 |
| C1orf220 | 0.1428571429  | 0.1428571429  | 0             | 0             | inf          | 1.42857E+32  |
| C1orf226 | 0.1428571429  | 0.1428571429  | 0             | 0             | inf          | 1.42857E+32  |
| C1orf229 | 0.1428571429  | 0.1428571429  | 0             | 0             | inf          | 1.42857E+32  |
| C1orf232 | 0.04761904762 | 0.04761904762 | 0.1111111111  | 0.1111111111  | 0.325        | 0.4285714286 |
| C1orf35  | 0.1428571429  | 0.1428571429  | 0             | 0             | inf          | 1.42857E+32  |
| C1orf43  | 0.1904761905  | 0.1904761905  | 0.05555555556 | 0.05555555556 | 3.294117647  | 3.428571429  |
| C1orf50  | 0.04761904762 | 0.04761904762 | 0.05555555556 | 0.05555555556 | 0.7          | 0.8571428571 |
| C1orf52  | 0.04761904762 | 0.04761904762 | 0.05555555556 | 0.05555555556 | 0.7          | 0.8571428571 |
| C1orf53  | 0.1428571429  | 0.1428571429  | 0             | 0             | inf          | 1.42857E+32  |
| C1orf54  | 0.1904761905  | 0.1904761905  | 0.05555555556 | 0.05555555556 | 3.294117647  | 3.428571429  |
| C1orf56  | 0.1904761905  | 0.1904761905  | 0.05555555556 | 0.05555555556 | 3.294117647  | 3.428571429  |
| C1orf61  | 0.1428571429  | 0.1428571429  | 0.1111111111  | 0.1111111111  | 1.083333333  | 1.285714286  |
| C1orf68  | 0.1904761905  | 0.1904761905  | 0             | 0             | inf          | 1.90476E+32  |
| C1orf74  | 0.1428571429  | 0.1428571429  | 0             | 0             | inf          | 1.42857E+32  |
| C1orf87  | 0.04761904762 | 0.04761904762 | 0.05555555556 | 0.05555555556 | 0.7          | 0.8571428571 |
| C1orf94  | 0.04761904762 | 0.04761904762 | 0             | 0             | inf          | 4.7619E+31   |
| C2       | 0.04761904762 | 0.04761904762 | 0             | 0             | inf          | 4.7619E+31   |
| C2-AS1   | 0.04761904762 | 0.04761904762 | 0             | 0             | inf          | 4.7619E+31   |
| 20orf14  | 0.1904761905  | 0.1904761905  | 0.05555555556 | 0.05555555556 | 3.294117647  | 3.428571429  |
| 20orf14  | 0.09523809524 | 0.09523809524 | 0.1111111111  | 0.1111111111  | 0.6842105263 | 0.8571428571 |
| 20orf17  | 0.09523809524 | 0.09523809524 | 0.1111111111  | 0.1111111111  | 0.6842105263 | 0.8571428571 |
| 20orf18  | 0.1904761905  | 0.1904761905  | 0.1666666667  | 0.1666666667  | 0.9411764706 | 1.142857143  |
| 20orf19  | 0.1904761905  | 0.1904761905  | 0.05555555556 | 0.05555555556 | 3.294117647  | 3.428571429  |
| 20orf19  | 0.1428571429  | 0.1428571429  | 0.1666666667  | 0.1666666667  | 0.6666666667 | 0.8571428571 |
| 20orf20  | 0.1904761905  | 0.1904761905  | 0.1111111111  | 0.1111111111  | 1.529411765  | 1.714285714  |
| 20orf20  | 0.09523809524 | 0.09523809524 | 0.1111111111  | 0.1111111111  | 0.6842105263 | 0.8571428571 |
| 20orf20  | 0.1428571429  | 0.1428571429  | 0.2222222222  | 0.2222222222  | 0.4583333333 | 0.6428571429 |
| C20orf78 | 0.1904761905  | 0.1904761905  | 0.05555555556 | 0.05555555556 | 3.294117647  | 3.428571429  |
| C20orf85 | 0.1428571429  | 0.1428571429  | 0.2222222222  | 0.2222222222  | 0.4583333333 | 0.6428571429 |
| C20orf96 | 0.1904761905  | 0.1904761905  | 0.05555555556 | 0.05555555556 | 3.294117647  | 3.428571429  |
| C21orf58 | 0.04761904762 | 0.04761904762 | 0.1111111111  | 0.1111111111  | 0.325        | 0.4285714286 |
| rf59-TC  | 0.04761904762 | 0.04761904762 | 0.1111111111  | 0.1111111111  | 0.325        | 0.4285714286 |
| C21orf62 | 0.04761904762 | 0.04761904762 | 0.1111111111  | 0.1111111111  | 0.325        | 0.4285714286 |
| orf62-A  | 0.04761904762 | 0.04761904762 | 0.1111111111  | 0.1111111111  | 0.325        | 0.4285714286 |
| C21orf91 | 0.04761904762 | 0.04761904762 | 0.05555555556 | 0.05555555556 | 0.7          | 0.8571428571 |
| orf91-C  | 0.04761904762 | 0.04761904762 | 0.05555555556 | 0.05555555556 | 0.7          | 0.8571428571 |

|          |               |               |              |              |              |              |
|----------|---------------|---------------|--------------|--------------|--------------|--------------|
| C22orf15 | 0.04761904762 | 0.04761904762 | 0.1111111111 | 0.1111111111 | 0.325        | 0.4285714286 |
| C22orf23 | 0             | 0             | 0.1111111111 | 0.1111111111 | 0            | 0            |
| C22orf24 | 0.04761904762 | 0.04761904762 | 0.1111111111 | 0.1111111111 | 0.325        | 0.4285714286 |
| C22orf31 | 0.04761904762 | 0.04761904762 | 0.1111111111 | 0.1111111111 | 0.325        | 0.4285714286 |
| C22orf34 | 0.04761904762 | 0.04761904762 | 0.1666666667 | 0.1666666667 | 0.2          | 0.2857142857 |
| C22orf39 | 0.04761904762 | 0.04761904762 | 0.0555555556 | 0.0555555556 | 0.7          | 0.8571428571 |
| C22orf42 | 0.04761904762 | 0.04761904762 | 0.1111111111 | 0.1111111111 | 0.325        | 0.4285714286 |
| C22orf46 | 0             | 0             | 0.1111111111 | 0.1111111111 | 0            | 0            |
| C2CD2    | 0.04761904762 | 0.04761904762 | 0.1111111111 | 0.1111111111 | 0.325        | 0.4285714286 |
| C2CD4A   | 0.04761904762 | 0.04761904762 | 0.0555555556 | 0.0555555556 | 0.7          | 0.8571428571 |
| C2CD4B   | 0.04761904762 | 0.04761904762 | 0.0555555556 | 0.0555555556 | 0.7          | 0.8571428571 |
| C2CD4C   | 0.09523809524 | 0.09523809524 | 0.1111111111 | 0.1111111111 | 0.6842105263 | 0.8571428571 |
| C2CD4D   | 0.1904761905  | 0.1904761905  | 0            | 0            | inf          | 1.90476E+32  |
| CD4D-A   | 0.1904761905  | 0.1904761905  | 0            | 0            | inf          | 1.90476E+32  |
| C2CD5    | 0.04761904762 | 0.04761904762 | 0.0555555556 | 0.0555555556 | 0.7          | 0.8571428571 |
| C2CD6    | 0             | 0             | 0.0555555556 | 0.0555555556 | 0            | 0            |
| C2orf15  | 0             | 0             | 0.0555555556 | 0.0555555556 | 0            | 0            |
| C2orf27A | 0             | 0             | 0.0555555556 | 0.0555555556 | 0            | 0            |
| C2orf27B | 0             | 0             | 0.0555555556 | 0.0555555556 | 0            | 0            |
| C2orf40  | 0             | 0             | 0.0555555556 | 0.0555555556 | 0            | 0            |
| C2orf42  | 0             | 0             | 0.0555555556 | 0.0555555556 | 0            | 0            |
| C2orf48  | 0             | 0             | 0.0555555556 | 0.0555555556 | 0            | 0            |
| C2orf49  | 0             | 0             | 0.0555555556 | 0.0555555556 | 0            | 0            |
| C2orf50  | 0             | 0             | 0.0555555556 | 0.0555555556 | 0            | 0            |
| C2orf66  | 0             | 0             | 0.0555555556 | 0.0555555556 | 0            | 0            |
| C2orf68  | 0             | 0             | 0.0555555556 | 0.0555555556 | 0            | 0            |
| C2orf69  | 0             | 0             | 0.0555555556 | 0.0555555556 | 0            | 0            |
| C2orf72  | 0             | 0             | 0.0555555556 | 0.0555555556 | 0            | 0            |
| C2orf73  | 0.04761904762 | 0.04761904762 | 0.0555555556 | 0.0555555556 | 0.7          | 0.8571428571 |
| C2orf74  | 0.09523809524 | 0.09523809524 | 0.0555555556 | 0.0555555556 | 1.473684211  | 1.714285714  |
| C2orf76  | 0             | 0             | 0.0555555556 | 0.0555555556 | 0            | 0            |
| C2orf78  | 0             | 0             | 0.0555555556 | 0.0555555556 | 0            | 0            |
| C2orf80  | 0             | 0             | 0.0555555556 | 0.0555555556 | 0            | 0            |
| C2orf81  | 0             | 0             | 0.0555555556 | 0.0555555556 | 0            | 0            |
| C2orf83  | 0             | 0             | 0.0555555556 | 0.0555555556 | 0            | 0            |
| C2orf88  | 0             | 0             | 0.0555555556 | 0.0555555556 | 0            | 0            |
| C2orf91  | 0             | 0             | 0.0555555556 | 0.0555555556 | 0            | 0            |
| C2orf92  | 0             | 0             | 0.1111111111 | 0.1111111111 | 0            | 0            |
| C3       | 0.1428571429  | 0.1428571429  | 0.0555555556 | 0.0555555556 | 2.333333333  | 2.571428571  |
| C3AR1    | 0.04761904762 | 0.04761904762 | 0.1111111111 | 0.1111111111 | 0.325        | 0.4285714286 |
| C3P1     | 0.1428571429  | 0.1428571429  | 0.1111111111 | 0.1111111111 | 1.083333333  | 1.285714286  |
| C3orf14  | 0.04761904762 | 0.04761904762 | 0            | 0            | inf          | 4.7619E+31   |
| C3orf18  | 0.09523809524 | 0.09523809524 | 0            | 0            | inf          | 9.52381E+31  |
| C3orf20  | 0.04761904762 | 0.04761904762 | 0            | 0            | inf          | 4.7619E+31   |
| C3orf22  | 0.04761904762 | 0.04761904762 | 0.0555555556 | 0.0555555556 | 0.7          | 0.8571428571 |
| C3orf33  | 0.1904761905  | 0.1904761905  | 0.0555555556 | 0.0555555556 | 3.294117647  | 3.428571429  |
| C3orf35  | 0.04761904762 | 0.04761904762 | 0            | 0            | inf          | 4.7619E+31   |
| C3orf36  | 0.1428571429  | 0.1428571429  | 0.0555555556 | 0.0555555556 | 2.333333333  | 2.571428571  |
| C3orf38  | 0.04761904762 | 0.04761904762 | 0            | 0            | inf          | 4.7619E+31   |
| C3orf49  | 0.04761904762 | 0.04761904762 | 0            | 0            | inf          | 4.7619E+31   |
| C3orf52  | 0.09523809524 | 0.09523809524 | 0.0555555556 | 0.0555555556 | 1.473684211  | 1.714285714  |

|          |               |               |               |               |              |              |
|----------|---------------|---------------|---------------|---------------|--------------|--------------|
| C3orf56  | 0.09523809524 | 0.09523809524 | 0.05555555556 | 0.05555555556 | 1.473684211  | 1.714285714  |
| C3orf62  | 0.09523809524 | 0.09523809524 | 0             | 0             | inf          | 9.52381E+31  |
| C3orf67  | 0.04761904762 | 0.04761904762 | 0             | 0             | inf          | 4.7619E+31   |
| orf67-A  | 0.04761904762 | 0.04761904762 | 0             | 0             | inf          | 4.7619E+31   |
| C3orf70  | 0.1428571429  | 0.1428571429  | 0.05555555556 | 0.05555555556 | 2.333333333  | 2.571428571  |
| C3orf79  | 0.1904761905  | 0.1904761905  | 0.1111111111  | 0.1111111111  | 1.529411765  | 1.714285714  |
| C3orf80  | 0.1428571429  | 0.1428571429  | 0.05555555556 | 0.05555555556 | 2.333333333  | 2.571428571  |
| C3orf84  | 0.09523809524 | 0.09523809524 | 0             | 0             | inf          | 9.52381E+31  |
| C3orf85  | 0.09523809524 | 0.09523809524 | 0.05555555556 | 0.05555555556 | 1.473684211  | 1.714285714  |
| C4A      | 0.04761904762 | 0.04761904762 | 0             | 0             | inf          | 4.7619E+31   |
| C4B      | 0.04761904762 | 0.04761904762 | 0             | 0             | inf          | 4.7619E+31   |
| C4BPA    | 0.1428571429  | 0.1428571429  | 0             | 0             | inf          | 1.42857E+32  |
| C4BPB    | 0.1428571429  | 0.1428571429  | 0             | 0             | inf          | 1.42857E+32  |
| C4B_2    | 0.04761904762 | 0.04761904762 | 0             | 0             | inf          | 4.7619E+31   |
| C4orf17  | 0             | 0             | 0.05555555556 | 0.05555555556 | 0            | 0            |
| C4orf3   | 0             | 0             | 0.05555555556 | 0.05555555556 | 0            | 0            |
| C4orf33  | 0             | 0             | 0.05555555556 | 0.05555555556 | 0            | 0            |
| C4orf36  | 0             | 0             | 0.05555555556 | 0.05555555556 | 0            | 0            |
| C4orf45  | 0             | 0             | 0.05555555556 | 0.05555555556 | 0            | 0            |
| C4orf46  | 0             | 0             | 0.05555555556 | 0.05555555556 | 0            | 0            |
| C4orf47  | 0             | 0             | 0.05555555556 | 0.05555555556 | 0            | 0            |
| C4orf48  | 0.04761904762 | 0.04761904762 | 0             | 0             | inf          | 4.7619E+31   |
| C4orf51  | 0             | 0             | 0.05555555556 | 0.05555555556 | 0            | 0            |
| C4orf54  | 0             | 0             | 0.05555555556 | 0.05555555556 | 0            | 0            |
| C5       | 0.09523809524 | 0.09523809524 | 0.05555555556 | 0.05555555556 | 1.473684211  | 1.714285714  |
| C5-OT1   | 0.09523809524 | 0.09523809524 | 0.05555555556 | 0.05555555556 | 1.473684211  | 1.714285714  |
| C5AR1    | 0.09523809524 | 0.09523809524 | 0.1111111111  | 0.1111111111  | 0.6842105263 | 0.8571428571 |
| C5AR2    | 0.09523809524 | 0.09523809524 | 0.1111111111  | 0.1111111111  | 0.6842105263 | 0.8571428571 |
| C5orf15  | 0.04761904762 | 0.04761904762 | 0             | 0             | inf          | 4.7619E+31   |
| C5orf17  | 0.04761904762 | 0.04761904762 | 0.05555555556 | 0.05555555556 | 0.7          | 0.8571428571 |
| C5orf22  | 0.04761904762 | 0.04761904762 | 0.05555555556 | 0.05555555556 | 0.7          | 0.8571428571 |
| C5orf24  | 0.04761904762 | 0.04761904762 | 0             | 0             | inf          | 4.7619E+31   |
| C5orf30  | 0.04761904762 | 0.04761904762 | 0             | 0             | inf          | 4.7619E+31   |
| C5orf34  | 0.04761904762 | 0.04761904762 | 0.05555555556 | 0.05555555556 | 0.7          | 0.8571428571 |
| C5orf38  | 0             | 0             | 0.1111111111  | 0.1111111111  | 0            | 0            |
| C5orf47  | 0             | 0             | 0.05555555556 | 0.05555555556 | 0            | 0            |
| C5orf49  | 0             | 0             | 0.05555555556 | 0.05555555556 | 0            | 0            |
| C5orf51  | 0.04761904762 | 0.04761904762 | 0.05555555556 | 0.05555555556 | 0.7          | 0.8571428571 |
| C5orf52  | 0.04761904762 | 0.04761904762 | 0.05555555556 | 0.05555555556 | 0.7          | 0.8571428571 |
| C5orf56  | 0.04761904762 | 0.04761904762 | 0             | 0             | inf          | 4.7619E+31   |
| C5orf58  | 0             | 0             | 0.05555555556 | 0.05555555556 | 0            | 0            |
| C5orf60  | 0.09523809524 | 0.09523809524 | 0.05555555556 | 0.05555555556 | 1.473684211  | 1.714285714  |
| C5orf63  | 0.04761904762 | 0.04761904762 | 0             | 0             | inf          | 4.7619E+31   |
| C5orf64  | 0.04761904762 | 0.04761904762 | 0             | 0             | inf          | 4.7619E+31   |
| orf64-A  | 0.04761904762 | 0.04761904762 | 0             | 0             | inf          | 4.7619E+31   |
| C5orf66  | 0.04761904762 | 0.04761904762 | 0             | 0             | inf          | 4.7619E+31   |
| orf66-A  | 0.04761904762 | 0.04761904762 | 0             | 0             | inf          | 4.7619E+31   |
| C5orf67  | 0.04761904762 | 0.04761904762 | 0.05555555556 | 0.05555555556 | 0.7          | 0.8571428571 |
| C6       | 0.04761904762 | 0.04761904762 | 0.05555555556 | 0.05555555556 | 0.7          | 0.8571428571 |
| C6orf132 | 0.04761904762 | 0.04761904762 | 0.05555555556 | 0.05555555556 | 0.7          | 0.8571428571 |
| C6orf203 | 0             | 0             | 0             | 0             |              | 0.00001      |

|            |               |               |               |               |              |              |
|------------|---------------|---------------|---------------|---------------|--------------|--------------|
| C6orf222   | 0.04761904762 | 0.04761904762 | 0.05555555556 | 0.05555555556 | 0.7          | 0.8571428571 |
| C6orf223   | 0.04761904762 | 0.04761904762 | 0.05555555556 | 0.05555555556 | 0.7          | 0.8571428571 |
| C6orf226   | 0.04761904762 | 0.04761904762 | 0.05555555556 | 0.05555555556 | 0.7          | 0.8571428571 |
| C6orf47    | 0.04761904762 | 0.04761904762 | 0             | 0             | inf          | 4.7619E+31   |
| C6orf48    | 0.04761904762 | 0.04761904762 | 0             | 0             | inf          | 4.7619E+31   |
| C6orf62    | 0             | 0             | 0.05555555556 | 0.05555555556 | 0            | 0            |
| C6orf89    | 0.04761904762 | 0.04761904762 | 0.05555555556 | 0.05555555556 | 0.7          | 0.8571428571 |
| C7         | 0.04761904762 | 0.04761904762 | 0.05555555556 | 0.05555555556 | 0.7          | 0.8571428571 |
| C7orf25    | 0.04761904762 | 0.04761904762 | 0.2222222222  | 0.2222222222  | 0.1375       | 0.2142857143 |
| C7orf26    | 0.04761904762 | 0.04761904762 | 0.1666666667  | 0.1666666667  | 0.2          | 0.2857142857 |
| C7orf31    | 0.04761904762 | 0.04761904762 | 0.2222222222  | 0.2222222222  | 0.1375       | 0.2142857143 |
| C7orf33    | 0.09523809524 | 0.09523809524 | 0.05555555556 | 0.05555555556 | 1.473684211  | 1.714285714  |
| C7orf50    | 0.04761904762 | 0.04761904762 | 0.1666666667  | 0.1666666667  | 0.2          | 0.2857142857 |
| C7orf57    | 0.04761904762 | 0.04761904762 | 0.2222222222  | 0.2222222222  | 0.1375       | 0.2142857143 |
| C7orf61    | 0.04761904762 | 0.04761904762 | 0.05555555556 | 0.05555555556 | 0.7          | 0.8571428571 |
| C7orf65    | 0.04761904762 | 0.04761904762 | 0.2222222222  | 0.2222222222  | 0.1375       | 0.2142857143 |
| C7orf66    | 0.04761904762 | 0.04761904762 | 0.05555555556 | 0.05555555556 | 0.7          | 0.8571428571 |
| C7orf69    | 0.04761904762 | 0.04761904762 | 0.2222222222  | 0.2222222222  | 0.1375       | 0.2142857143 |
| C7orf71    | 0.04761904762 | 0.04761904762 | 0.2222222222  | 0.2222222222  | 0.1375       | 0.2142857143 |
| C7orf77    | 0.04761904762 | 0.04761904762 | 0.05555555556 | 0.05555555556 | 0.7          | 0.8571428571 |
| C8A        | 0.04761904762 | 0.04761904762 | 0.05555555556 | 0.05555555556 | 0.7          | 0.8571428571 |
| C8B        | 0.04761904762 | 0.04761904762 | 0.05555555556 | 0.05555555556 | 0.7          | 0.8571428571 |
| C8G        | 0.1428571429  | 0.1428571429  | 0.05555555556 | 0.05555555556 | 2.333333333  | 2.571428571  |
| C8orf31    | 0.04761904762 | 0.04761904762 | 0.1666666667  | 0.1666666667  | 0.2          | 0.2857142857 |
| C8orf33    | 0.09523809524 | 0.09523809524 | 0.2222222222  | 0.2222222222  | 0.2894736842 | 0.4285714286 |
| C8orf34    | 0.1428571429  | 0.1428571429  | 0.1666666667  | 0.1666666667  | 0.6666666667 | 0.8571428571 |
| C8orf34-A  | 0.1428571429  | 0.1428571429  | 0.1666666667  | 0.1666666667  | 0.6666666667 | 0.8571428571 |
| C8orf37    | 0.1904761905  | 0.1904761905  | 0.1111111111  | 0.1111111111  | 1.529411765  | 1.714285714  |
| C8orf37-A  | 0.1904761905  | 0.1904761905  | 0.1111111111  | 0.1111111111  | 1.529411765  | 1.714285714  |
| C8orf44    | 0.1428571429  | 0.1428571429  | 0.1666666667  | 0.1666666667  | 0.6666666667 | 0.8571428571 |
| C8orf44-SG | 0.1428571429  | 0.1428571429  | 0.1666666667  | 0.1666666667  | 0.6666666667 | 0.8571428571 |
| C8orf48    | 0.09523809524 | 0.09523809524 | 0.1111111111  | 0.1111111111  | 0.6842105263 | 0.8571428571 |
| C8orf49    | 0.09523809524 | 0.09523809524 | 0.1111111111  | 0.1111111111  | 0.6842105263 | 0.8571428571 |
| C8orf58    | 0.09523809524 | 0.09523809524 | 0.1111111111  | 0.1111111111  | 0.6842105263 | 0.8571428571 |
| C8orf74    | 0.09523809524 | 0.09523809524 | 0.1111111111  | 0.1111111111  | 0.6842105263 | 0.8571428571 |
| C8orf76    | 0.1428571429  | 0.1428571429  | 0.1111111111  | 0.1111111111  | 1.083333333  | 1.285714286  |
| C8orf82    | 0.04761904762 | 0.04761904762 | 0.1666666667  | 0.1666666667  | 0.2          | 0.2857142857 |
| C8orf86    | 0.09523809524 | 0.09523809524 | 0.1111111111  | 0.1111111111  | 0.6842105263 | 0.8571428571 |
| C8orf87    | 0.1904761905  | 0.1904761905  | 0.1111111111  | 0.1111111111  | 1.529411765  | 1.714285714  |
| C8orf88    | 0.1904761905  | 0.1904761905  | 0.1111111111  | 0.1111111111  | 1.529411765  | 1.714285714  |
| C8orf89    | 0.1904761905  | 0.1904761905  | 0.1666666667  | 0.1666666667  | 0.9411764706 | 1.142857143  |
| C9         | 0.04761904762 | 0.04761904762 | 0.05555555556 | 0.05555555556 | 0.7          | 0.8571428571 |
| C9orf106   | 0.09523809524 | 0.09523809524 | 0.05555555556 | 0.05555555556 | 1.473684211  | 1.714285714  |
| C9orf110   | 0.04761904762 | 0.04761904762 | 0             | 0             | inf          | 4.7619E+31   |
| C9orf129   | 0.04761904762 | 0.04761904762 | 0.05555555556 | 0.05555555556 | 0.7          | 0.8571428571 |
| C9orf131   | 0.09523809524 | 0.09523809524 | 0.05555555556 | 0.05555555556 | 1.473684211  | 1.714285714  |
| C9orf135   | 0             | 0             | 0.05555555556 | 0.05555555556 | 0            | 0            |
| C9orf135-l | 0             | 0             | 0.05555555556 | 0.05555555556 | 0            | 0            |
| C9orf139   | 0.1428571429  | 0.1428571429  | 0.05555555556 | 0.05555555556 | 2.333333333  | 2.571428571  |
| C9orf147   | 0.04761904762 | 0.04761904762 | 0.05555555556 | 0.05555555556 | 0.7          | 0.8571428571 |
| C9orf152   | 0.04761904762 | 0.04761904762 | 0.05555555556 | 0.05555555556 | 0.7          | 0.8571428571 |

|          |               |               |               |               |              |              |
|----------|---------------|---------------|---------------|---------------|--------------|--------------|
| C9orf153 | 0             | 0             | 0.05555555556 | 0.05555555556 | 0            | 0            |
| C9orf16  | 0.09523809524 | 0.09523809524 | 0.05555555556 | 0.05555555556 | 1.473684211  | 1.714285714  |
| C9orf163 | 0.1428571429  | 0.1428571429  | 0.05555555556 | 0.05555555556 | 2.333333333  | 2.571428571  |
| C9orf170 | 0             | 0             | 0.05555555556 | 0.05555555556 | 0            | 0            |
| C9orf24  | 0.09523809524 | 0.09523809524 | 0.05555555556 | 0.05555555556 | 1.473684211  | 1.714285714  |
| C9orf40  | 0             | 0             | 0.05555555556 | 0.05555555556 | 0            | 0            |
| C9orf43  | 0.04761904762 | 0.04761904762 | 0.05555555556 | 0.05555555556 | 0.7          | 0.8571428571 |
| C9orf47  | 0             | 0             | 0.05555555556 | 0.05555555556 | 0            | 0            |
| C9orf50  | 0.09523809524 | 0.09523809524 | 0.05555555556 | 0.05555555556 | 1.473684211  | 1.714285714  |
| C9orf57  | 0             | 0             | 0.05555555556 | 0.05555555556 | 0            | 0            |
| C9orf62  | 0.04761904762 | 0.04761904762 | 0             | 0             | inf          | 4.7619E+31   |
| C9orf64  | 0             | 0             | 0.05555555556 | 0.05555555556 | 0            | 0            |
| C9orf66  | 0.04761904762 | 0.04761904762 | 0.05555555556 | 0.05555555556 | 0.7          | 0.8571428571 |
| C9orf72  | 0.04761904762 | 0.04761904762 | 0.05555555556 | 0.05555555556 | 0.7          | 0.8571428571 |
| C9orf78  | 0.09523809524 | 0.09523809524 | 0.05555555556 | 0.05555555556 | 1.473684211  | 1.714285714  |
| C9orf85  | 0             | 0             | 0.05555555556 | 0.05555555556 | 0            | 0            |
| C9orf92  | 0.04761904762 | 0.04761904762 | 0.05555555556 | 0.05555555556 | 0.7          | 0.8571428571 |
| CA1      | 0.1904761905  | 0.1904761905  | 0.1111111111  | 0.1111111111  | 1.529411765  | 1.714285714  |
| CA10     | 0.04761904762 | 0.04761904762 | 0             | 0             | inf          | 4.7619E+31   |
| CA11     | 0.09523809524 | 0.09523809524 | 0.1111111111  | 0.1111111111  | 0.6842105263 | 0.8571428571 |
| CA12     | 0.04761904762 | 0.04761904762 | 0.05555555556 | 0.05555555556 | 0.7          | 0.8571428571 |
| CA13     | 0.1904761905  | 0.1904761905  | 0.1111111111  | 0.1111111111  | 1.529411765  | 1.714285714  |
| CA14     | 0.1904761905  | 0.1904761905  | 0.05555555556 | 0.05555555556 | 3.294117647  | 3.428571429  |
| CA2      | 0.1904761905  | 0.1904761905  | 0.1111111111  | 0.1111111111  | 1.529411765  | 1.714285714  |
| CA3      | 0.1904761905  | 0.1904761905  | 0.1111111111  | 0.1111111111  | 1.529411765  | 1.714285714  |
| CA3-AS1  | 0.1904761905  | 0.1904761905  | 0.1111111111  | 0.1111111111  | 1.529411765  | 1.714285714  |
| CA4      | 0.1428571429  | 0.1428571429  | 0             | 0             | inf          | 1.42857E+32  |
| CA5A     | 0.04761904762 | 0.04761904762 | 0             | 0             | inf          | 4.7619E+31   |
| CA6      | 0             | 0             | 0.05555555556 | 0.05555555556 | 0            | 0            |
| CA7      | 0.09523809524 | 0.09523809524 | 0.05555555556 | 0.05555555556 | 1.473684211  | 1.714285714  |
| CA8      | 0.1428571429  | 0.1428571429  | 0.1666666667  | 0.1666666667  | 0.6666666667 | 0.8571428571 |
| CA9      | 0.09523809524 | 0.09523809524 | 0.05555555556 | 0.05555555556 | 1.473684211  | 1.714285714  |
| CAAP1    | 0.04761904762 | 0.04761904762 | 0.05555555556 | 0.05555555556 | 0.7          | 0.8571428571 |
| CAB39    | 0             | 0             | 0.05555555556 | 0.05555555556 | 0            | 0            |
| ABCOC    | 0.04761904762 | 0.04761904762 | 0.1666666667  | 0.1666666667  | 0.2          | 0.2857142857 |
| CABIN1   | 0.04761904762 | 0.04761904762 | 0.1111111111  | 0.1111111111  | 0.325        | 0.4285714286 |
| CABLES   | 0.04761904762 | 0.04761904762 | 0.05555555556 | 0.05555555556 | 0.7          | 0.8571428571 |
| CABLES   | 0.1428571429  | 0.1428571429  | 0.2222222222  | 0.2222222222  | 0.4583333333 | 0.6428571429 |
| CABP1    | 0             | 0             | 0.1111111111  | 0.1111111111  | 0            | 0            |
| CABP5    | 0.09523809524 | 0.09523809524 | 0.1111111111  | 0.1111111111  | 0.6842105263 | 0.8571428571 |
| CABP7    | 0.04761904762 | 0.04761904762 | 0.1111111111  | 0.1111111111  | 0.325        | 0.4285714286 |
| CABS1    | 0.04761904762 | 0.04761904762 | 0.05555555556 | 0.05555555556 | 0.7          | 0.8571428571 |
| CABYR    | 0.09523809524 | 0.09523809524 | 0.05555555556 | 0.05555555556 | 1.473684211  | 1.714285714  |
| CACFDI   | 0.04761904762 | 0.04761904762 | 0             | 0             | inf          | 4.7619E+31   |
| CACHDI   | 0.04761904762 | 0.04761904762 | 0.05555555556 | 0.05555555556 | 0.7          | 0.8571428571 |
| ACNA1    | 0.1428571429  | 0.1428571429  | 0.1111111111  | 0.1111111111  | 1.083333333  | 1.285714286  |
| ACNA1    | 0.09523809524 | 0.09523809524 | 0             | 0             | inf          | 9.52381E+31  |
| ACNA10   | 0.04761904762 | 0.04761904762 | 0.1666666667  | 0.1666666667  | 0.2          | 0.2857142857 |
| CNA1C-   | 0.04761904762 | 0.04761904762 | 0.1666666667  | 0.1666666667  | 0.2          | 0.2857142857 |
| CNA1C-   | 0.04761904762 | 0.04761904762 | 0.1666666667  | 0.1666666667  | 0.2          | 0.2857142857 |
| CNA1C-   | 0.04761904762 | 0.04761904762 | 0.1666666667  | 0.1666666667  | 0.2          | 0.2857142857 |



|          |               |               |              |              |              |              |
|----------|---------------|---------------|--------------|--------------|--------------|--------------|
| CNA1C-   | 0.04761904762 | 0.04761904762 | 0.1666666667 | 0.1666666667 | 0.2          | 0.2857142857 |
| CNA1C    | 0.04761904762 | 0.04761904762 | 0.1666666667 | 0.1666666667 | 0.2          | 0.2857142857 |
| ACNA10   | 0.04761904762 | 0.04761904762 | 0            | 0            | inf          | 4.7619E+31   |
| ACNA1    | 0.1428571429  | 0.1428571429  | 0            | 0            | inf          | 1.42857E+32  |
| ACNA10   | 0.09523809524 | 0.09523809524 | 0            | 0            | inf          | 9.52381E+31  |
| CNA1G-   | 0.09523809524 | 0.09523809524 | 0            | 0            | inf          | 9.52381E+31  |
| ACNA10   | 0.04761904762 | 0.04761904762 | 0.2222222222 | 0.2222222222 | 0.1375       | 0.2142857143 |
| CACNA1   | 0             | 0             | 0.1111111111 | 0.1111111111 | 0            | 0            |
| ACNA1    | 0.1428571429  | 0.1428571429  | 0            | 0            | inf          | 1.42857E+32  |
| ACNA210  | 0.04761904762 | 0.04761904762 | 0.1666666667 | 0.1666666667 | 0.2          | 0.2857142857 |
| ACNA210  | 0.09523809524 | 0.09523809524 | 0            | 0            | inf          | 9.52381E+31  |
| ACNA210  | 0.04761904762 | 0.04761904762 | 0            | 0            | inf          | 4.7619E+31   |
| ACNA2D3- | 0.04761904762 | 0.04761904762 | 0            | 0            | inf          | 4.7619E+31   |
| ACNA210  | 0.04761904762 | 0.04761904762 | 0.1666666667 | 0.1666666667 | 0.2          | 0.2857142857 |
| CACNB10  | 0.09523809524 | 0.09523809524 | 0            | 0            | inf          | 9.52381E+31  |
| CACNB20  | 0.09523809524 | 0.09523809524 | 0.1111111111 | 0.1111111111 | 0.6842105263 | 0.8571428571 |
| CACNB30  | 0.04761904762 | 0.04761904762 | 0.0555555556 | 0.0555555556 | 0.7          | 0.8571428571 |
| CACNB4   | 0             | 0             | 0.0555555556 | 0.0555555556 | 0            | 0            |
| CACNG1   | 0             | 0             | 0            | 0            |              | 0.00001      |
| CACNG2   | 0             | 0             | 0.1111111111 | 0.1111111111 | 0            | 0            |
| CACNG30  | 0.04761904762 | 0.04761904762 | 0            | 0            | inf          | 4.7619E+31   |
| CACNG4   | 0             | 0             | 0            | 0            |              | 0.00001      |
| CACNG5   | 0             | 0             | 0            | 0            |              | 0.00001      |
| CACNG60  | 0.09523809524 | 0.09523809524 | 0.0555555556 | 0.0555555556 | 1.473684211  | 1.714285714  |
| CACNG70  | 0.09523809524 | 0.09523809524 | 0.0555555556 | 0.0555555556 | 1.473684211  | 1.714285714  |
| CACNG80  | 0.09523809524 | 0.09523809524 | 0.0555555556 | 0.0555555556 | 1.473684211  | 1.714285714  |
| CACTIN0  | 0.09523809524 | 0.09523809524 | 0.0555555556 | 0.0555555556 | 1.473684211  | 1.714285714  |
| ACTIN-A0 | 0.09523809524 | 0.09523809524 | 0.0555555556 | 0.0555555556 | 1.473684211  | 1.714285714  |
| CACUL10  | 0.2380952381  | 0.2380952381  | 0            | 0            | inf          | 2.38095E+32  |
| CACYB10  | 0.1428571429  | 0.1428571429  | 0            | 0            | inf          | 1.42857E+32  |
| CADM20   | 0.04761904762 | 0.04761904762 | 0            | 0            | inf          | 4.7619E+31   |
| ADM2-A0  | 0.04761904762 | 0.04761904762 | 0            | 0            | inf          | 4.7619E+31   |
| CADM30   | 0.1428571429  | 0.1428571429  | 0            | 0            | inf          | 1.42857E+32  |
| ADM3-A0  | 0.1428571429  | 0.1428571429  | 0            | 0            | inf          | 1.42857E+32  |
| CADM40   | 0.09523809524 | 0.09523809524 | 0.0555555556 | 0.0555555556 | 1.473684211  | 1.714285714  |
| CADPS0   | 0.04761904762 | 0.04761904762 | 0            | 0            | inf          | 4.7619E+31   |
| CADPS20  | 0.04761904762 | 0.04761904762 | 0.0555555556 | 0.0555555556 | 0.7          | 0.8571428571 |
| CAHM     | 0             | 0             | 0.1111111111 | 0.1111111111 | 0            | 0            |
| CALB10   | 0.1904761905  | 0.1904761905  | 0.1111111111 | 0.1111111111 | 1.529411765  | 1.714285714  |
| CALB20   | 0.04761904762 | 0.04761904762 | 0            | 0            | inf          | 4.7619E+31   |
| ALCOCC0  | 0.04761904762 | 0.04761904762 | 0.0555555556 | 0.0555555556 | 0.7          | 0.8571428571 |
| ALCOCC0  | 0.1428571429  | 0.1428571429  | 0            | 0            | inf          | 1.42857E+32  |
| CALCR0   | 0.04761904762 | 0.04761904762 | 0.1111111111 | 0.1111111111 | 0.325        | 0.4285714286 |
| CALCRI   | 0             | 0             | 0.0555555556 | 0.0555555556 | 0            | 0            |
| CALD10   | 0.04761904762 | 0.04761904762 | 0.0555555556 | 0.0555555556 | 0.7          | 0.8571428571 |
| CALHM0   | 0.1428571429  | 0.1428571429  | 0.0555555556 | 0.0555555556 | 2.333333333  | 2.571428571  |
| CALHM0   | 0.1428571429  | 0.1428571429  | 0.0555555556 | 0.0555555556 | 2.333333333  | 2.571428571  |
| CALHM0   | 0.1428571429  | 0.1428571429  | 0.0555555556 | 0.0555555556 | 2.333333333  | 2.571428571  |
| CALM2    | 0             | 0             | 0.0555555556 | 0.0555555556 | 0            | 0            |
| CALM30   | 0.09523809524 | 0.09523809524 | 0.1111111111 | 0.1111111111 | 0.6842105263 | 0.8571428571 |
| CALML3   | 0             | 0             | 0.1666666667 | 0.1666666667 | 0            | 0            |

|         |               |               |               |               |              |              |
|---------|---------------|---------------|---------------|---------------|--------------|--------------|
| LML3-A  | 0             | 0             | 0.1666666667  | 0.1666666667  | 0            | 0            |
| CALML4  | 0.04761904762 | 0.04761904762 | 0.05555555556 | 0.05555555556 | 0.7          | 0.8571428571 |
| CALML5  | 0             | 0             | 0.1666666667  | 0.1666666667  | 0            | 0            |
| CALML6  | 0             | 0             | 0.1111111111  | 0.1111111111  | 0            | 0            |
| CALN1   | 0.1428571429  | 0.1428571429  | 0.1111111111  | 0.1111111111  | 1.083333333  | 1.285714286  |
| CALR    | 0.1428571429  | 0.1428571429  | 0.1111111111  | 0.1111111111  | 1.083333333  | 1.285714286  |
| CALR3   | 0.1428571429  | 0.1428571429  | 0.1111111111  | 0.1111111111  | 1.083333333  | 1.285714286  |
| CALU    | 0.04761904762 | 0.04761904762 | 0.05555555556 | 0.05555555556 | 0.7          | 0.8571428571 |
| CALY    | 0.1904761905  | 0.1904761905  | 0             | 0             | inf          | 1.90476E+32  |
| CAMK1   | 0.09523809524 | 0.09523809524 | 0             | 0             | inf          | 9.52381E+31  |
| CAMK11  | 0.09523809524 | 0.09523809524 | 0.1111111111  | 0.1111111111  | 0.6842105263 | 0.8571428571 |
| CAMK1C  | 0.1428571429  | 0.1428571429  | 0             | 0             | inf          | 1.42857E+32  |
| CAMK21  | 0.04761904762 | 0.04761904762 | 0.1666666667  | 0.1666666667  | 0.2          | 0.2857142857 |
| CAMK21  | 0             | 0             | 0.05555555556 | 0.05555555556 | 0            | 0            |
| CAMK2C  | 0.1904761905  | 0.1904761905  | 0.05555555556 | 0.05555555556 | 3.294117647  | 3.428571429  |
| AMK2N   | 0.04761904762 | 0.04761904762 | 0.1111111111  | 0.1111111111  | 0.325        | 0.4285714286 |
| AMK2N   | 0.1428571429  | 0.1428571429  | 0.05555555556 | 0.05555555556 | 2.333333333  | 2.571428571  |
| CAMK4   | 0.04761904762 | 0.04761904762 | 0             | 0             | inf          | 4.7619E+31   |
| CAMKK   | 0             | 0             | 0.1111111111  | 0.1111111111  | 0            | 0            |
| CAMKK   | 0.04761904762 | 0.04761904762 | 0.1111111111  | 0.1111111111  | 0.325        | 0.4285714286 |
| AMKM    | 0             | 0             | 0.05555555556 | 0.05555555556 | 0            | 0            |
| CAMKV   | 0.09523809524 | 0.09523809524 | 0             | 0             | inf          | 9.52381E+31  |
| CAMLG   | 0.04761904762 | 0.04761904762 | 0             | 0             | inf          | 4.7619E+31   |
| CAMP    | 0.09523809524 | 0.09523809524 | 0             | 0             | inf          | 9.52381E+31  |
| AMSAP   | 0.04761904762 | 0.04761904762 | 0             | 0             | inf          | 4.7619E+31   |
| AMSAP   | 0.1428571429  | 0.1428571429  | 0             | 0             | inf          | 1.42857E+32  |
| AMSAP   | 0.1428571429  | 0.1428571429  | 0.05555555556 | 0.05555555556 | 2.333333333  | 2.571428571  |
| CAMTA   | 0             | 0             | 0.05555555556 | 0.05555555556 | 0            | 0            |
| MTA1-I  | 0             | 0             | 0.05555555556 | 0.05555555556 | 0            | 0            |
| CAMTA   | 0             | 0             | 0.1111111111  | 0.1111111111  | 0            | 0            |
| CAND1   | 0.09523809524 | 0.09523809524 | 0.05555555556 | 0.05555555556 | 1.473684211  | 1.714285714  |
| CAND2   | 0.09523809524 | 0.09523809524 | 0             | 0             | inf          | 9.52381E+31  |
| CANT1   | 0.04761904762 | 0.04761904762 | 0             | 0             | inf          | 4.7619E+31   |
| CANX    | 0.09523809524 | 0.09523809524 | 0.05555555556 | 0.05555555556 | 1.473684211  | 1.714285714  |
| CAP1    | 0.04761904762 | 0.04761904762 | 0.05555555556 | 0.05555555556 | 0.7          | 0.8571428571 |
| CAPG    | 0             | 0             | 0.05555555556 | 0.05555555556 | 0            | 0            |
| CAPN10  | 0             | 0             | 0.05555555556 | 0.05555555556 | 0            | 0            |
| APN10-I | 0             | 0             | 0.05555555556 | 0.05555555556 | 0            | 0            |
| CAPN11  | 0.04761904762 | 0.04761904762 | 0.05555555556 | 0.05555555556 | 0.7          | 0.8571428571 |
| CAPN12  | 0.04761904762 | 0.04761904762 | 0.05555555556 | 0.05555555556 | 0.7          | 0.8571428571 |
| CAPN13  | 0             | 0             | 0.05555555556 | 0.05555555556 | 0            | 0            |
| CAPN14  | 0             | 0             | 0.05555555556 | 0.05555555556 | 0            | 0            |
| CAPN15  | 0.04761904762 | 0.04761904762 | 0.2222222222  | 0.2222222222  | 0.1375       | 0.2142857143 |
| CAPN2   | 0.1428571429  | 0.1428571429  | 0.05555555556 | 0.05555555556 | 2.333333333  | 2.571428571  |
| CAPN7   | 0.04761904762 | 0.04761904762 | 0             | 0             | inf          | 4.7619E+31   |
| CAPN8   | 0.1428571429  | 0.1428571429  | 0.05555555556 | 0.05555555556 | 2.333333333  | 2.571428571  |
| CAPN9   | 0.1428571429  | 0.1428571429  | 0             | 0             | inf          | 1.42857E+32  |
| CAPNS1  | 0.04761904762 | 0.04761904762 | 0.05555555556 | 0.05555555556 | 0.7          | 0.8571428571 |
| CAPNS2  | 0.04761904762 | 0.04761904762 | 0             | 0             | inf          | 4.7619E+31   |
| APRIN   | 0.04761904762 | 0.04761904762 | 0.05555555556 | 0.05555555556 | 0.7          | 0.8571428571 |
| CAPS    | 0.1428571429  | 0.1428571429  | 0.05555555556 | 0.05555555556 | 2.333333333  | 2.571428571  |

|         |               |               |               |               |              |              |
|---------|---------------|---------------|---------------|---------------|--------------|--------------|
| CAPSL   | 0.04761904762 | 0.04761904762 | 0.05555555556 | 0.05555555556 | 0.7          | 0.8571428571 |
| CAPZA1  | 0.04761904762 | 0.04761904762 | 0.05555555556 | 0.05555555556 | 0.7          | 0.8571428571 |
| CAPZA2  | 0.09523809524 | 0.09523809524 | 0.2222222222  | 0.2222222222  | 0.2894736842 | 0.4285714286 |
| CAPZA3  | 0.04761904762 | 0.04761904762 | 0.1111111111  | 0.1111111111  | 0.325        | 0.4285714286 |
| CAPZB   | 0.04761904762 | 0.04761904762 | 0.1111111111  | 0.1111111111  | 0.325        | 0.4285714286 |
| CARD10  | 0             | 0             | 0.1111111111  | 0.1111111111  | 0            | 0            |
| CARD11  | 0.09523809524 | 0.09523809524 | 0.1666666667  | 0.1666666667  | 0.4210526316 | 0.5714285714 |
| CARD14  | 0.04761904762 | 0.04761904762 | 0             | 0             | inf          | 4.7619E+31   |
| CARD19  | 0.04761904762 | 0.04761904762 | 0.05555555556 | 0.05555555556 | 0.7          | 0.8571428571 |
| CARD6   | 0.04761904762 | 0.04761904762 | 0.05555555556 | 0.05555555556 | 0.7          | 0.8571428571 |
| CARD8   | 0.09523809524 | 0.09523809524 | 0.1111111111  | 0.1111111111  | 0.6842105263 | 0.8571428571 |
| CARD8-A | 0.09523809524 | 0.09523809524 | 0.1111111111  | 0.1111111111  | 0.6842105263 | 0.8571428571 |
| CARD9   | 0.1428571429  | 0.1428571429  | 0.05555555556 | 0.05555555556 | 2.333333333  | 2.571428571  |
| CARF    | 0.09523809524 | 0.09523809524 | 0.05555555556 | 0.05555555556 | 1.473684211  | 1.714285714  |
| CARHSP  | 0.09523809524 | 0.09523809524 | 0             | 0             | inf          | 9.52381E+31  |
| CARM1   | 0.1428571429  | 0.1428571429  | 0.1111111111  | 0.1111111111  | 1.083333333  | 1.285714286  |
| CARMIL  | 0             | 0             | 0.05555555556 | 0.05555555556 | 0            | 0            |
| CARMIL  | 0.1428571429  | 0.1428571429  | 0.05555555556 | 0.05555555556 | 2.333333333  | 2.571428571  |
| CARNMT  | 0             | 0             | 0.05555555556 | 0.05555555556 | 0            | 0            |
| CARNMT1 | 0             | 0             | 0.05555555556 | 0.05555555556 | 0            | 0            |
| CARS    | 0.04761904762 | 0.04761904762 | 0             | 0             | inf          | 4.7619E+31   |
| CARS-AS | 0.04761904762 | 0.04761904762 | 0             | 0             | inf          | 4.7619E+31   |
| CASC1   | 0.04761904762 | 0.04761904762 | 0.05555555556 | 0.05555555556 | 0.7          | 0.8571428571 |
| CASC10  | 0.09523809524 | 0.09523809524 | 0.1111111111  | 0.1111111111  | 0.6842105263 | 0.8571428571 |
| CASC11  | 0.09523809524 | 0.09523809524 | 0.1111111111  | 0.1111111111  | 0.6842105263 | 0.8571428571 |
| CASC16  | 0.04761904762 | 0.04761904762 | 0             | 0             | inf          | 4.7619E+31   |
| CASC17  | 0             | 0             | 0             | 0             |              | 0.00001      |
| CASC18  | 0.04761904762 | 0.04761904762 | 0.05555555556 | 0.05555555556 | 0.7          | 0.8571428571 |
| CASC19  | 0.09523809524 | 0.09523809524 | 0.1111111111  | 0.1111111111  | 0.6842105263 | 0.8571428571 |
| CASC2   | 0.2380952381  | 0.2380952381  | 0             | 0             | inf          | 2.38095E+32  |
| CASC20  | 0.1904761905  | 0.1904761905  | 0.1111111111  | 0.1111111111  | 1.529411765  | 1.714285714  |
| CASC21  | 0.09523809524 | 0.09523809524 | 0.1111111111  | 0.1111111111  | 0.6842105263 | 0.8571428571 |
| CASC22  | 0.04761904762 | 0.04761904762 | 0             | 0             | inf          | 4.7619E+31   |
| CASC3   | 0.09523809524 | 0.09523809524 | 0             | 0             | inf          | 9.52381E+31  |
| CASC6   | 0             | 0             | 0             | 0             |              | 0.00001      |
| CASC8   | 0.09523809524 | 0.09523809524 | 0.1111111111  | 0.1111111111  | 0.6842105263 | 0.8571428571 |
| CASC9   | 0.1904761905  | 0.1904761905  | 0.1111111111  | 0.1111111111  | 1.529411765  | 1.714285714  |
| CASD1   | 0.04761904762 | 0.04761904762 | 0.1111111111  | 0.1111111111  | 0.325        | 0.4285714286 |
| CASKIN  | 0.09523809524 | 0.09523809524 | 0.2222222222  | 0.2222222222  | 0.2894736842 | 0.4285714286 |
| CASP10  | 0             | 0             | 0.05555555556 | 0.05555555556 | 0            | 0            |
| CASP14  | 0.1428571429  | 0.1428571429  | 0.1111111111  | 0.1111111111  | 1.083333333  | 1.285714286  |
| CASP16  | 0.04761904762 | 0.04761904762 | 0.1111111111  | 0.1111111111  | 0.325        | 0.4285714286 |
| CASP2   | 0.04761904762 | 0.04761904762 | 0.05555555556 | 0.05555555556 | 0.7          | 0.8571428571 |
| CASP3   | 0             | 0             | 0.05555555556 | 0.05555555556 | 0            | 0            |
| CASP6   | 0             | 0             | 0.05555555556 | 0.05555555556 | 0            | 0            |
| CASP7   | 0.1428571429  | 0.1428571429  | 0.05555555556 | 0.05555555556 | 2.333333333  | 2.571428571  |
| CASP8   | 0             | 0             | 0.05555555556 | 0.05555555556 | 0            | 0            |
| CASP8AF | 0             | 0             | 0             | 0             |              | 0.00001      |
| CASP9   | 0.04761904762 | 0.04761904762 | 0.1111111111  | 0.1111111111  | 0.325        | 0.4285714286 |
| CASQ1   | 0.1428571429  | 0.1428571429  | 0             | 0             | inf          | 1.42857E+32  |
| CASQ2   | 0.04761904762 | 0.04761904762 | 0.05555555556 | 0.05555555556 | 0.7          | 0.8571428571 |

|         |               |               |               |               |              |              |
|---------|---------------|---------------|---------------|---------------|--------------|--------------|
| CASR    | 0.09523809524 | 0.09523809524 | 0.05555555556 | 0.05555555556 | 1.473684211  | 1.714285714  |
| CASS4   | 0.09523809524 | 0.09523809524 | 0.16666666667 | 0.16666666667 | 0.4210526316 | 0.5714285714 |
| CAST    | 0.04761904762 | 0.04761904762 | 0             | 0             | inf          | 4.7619E+31   |
| ASTOR0  | 0.04761904762 | 0.04761904762 | 0.11111111111 | 0.11111111111 | 0.325        | 0.4285714286 |
| ASTOR1  | 0.1428571429  | 0.1428571429  | 0.16666666667 | 0.16666666667 | 0.6666666667 | 0.8571428571 |
| ASTOR2  | 0.04761904762 | 0.04761904762 | 0.05555555556 | 0.05555555556 | 0.7          | 0.8571428571 |
| CASZ1   | 0.04761904762 | 0.04761904762 | 0.11111111111 | 0.11111111111 | 0.325        | 0.4285714286 |
| CATIP   | 0             | 0             | 0.05555555556 | 0.05555555556 | 0            | 0            |
| ATIP-AS | 0             | 0             | 0.05555555556 | 0.05555555556 | 0            | 0            |
| ATIP-AS | 0             | 0             | 0.05555555556 | 0.05555555556 | 0            | 0            |
| ATSPE0  | 0.04761904762 | 0.04761904762 | 0.11111111111 | 0.11111111111 | 0.325        | 0.4285714286 |
| ATSPE1  | 0.1428571429  | 0.1428571429  | 0.05555555556 | 0.05555555556 | 2.3333333333 | 2.571428571  |
| ATSPE2  | 0.1428571429  | 0.1428571429  | 0.05555555556 | 0.05555555556 | 2.3333333333 | 2.571428571  |
| ATSPE3  | 0.04761904762 | 0.04761904762 | 0.05555555556 | 0.05555555556 | 0.7          | 0.8571428571 |
| CAV1    | 0.04761904762 | 0.04761904762 | 0.11111111111 | 0.11111111111 | 0.325        | 0.4285714286 |
| CAV2    | 0.04761904762 | 0.04761904762 | 0.11111111111 | 0.11111111111 | 0.325        | 0.4285714286 |
| CAV3    | 0.04761904762 | 0.04761904762 | 0             | 0             | inf          | 4.7619E+31   |
| CAVIN1  | 0.04761904762 | 0.04761904762 | 0             | 0             | inf          | 4.7619E+31   |
| CAVIN2  | 0             | 0             | 0.05555555556 | 0.05555555556 | 0            | 0            |
| CAVIN3  | 0.04761904762 | 0.04761904762 | 0             | 0             | inf          | 4.7619E+31   |
| CAVIN4  | 0.04761904762 | 0.04761904762 | 0             | 0             | inf          | 4.7619E+31   |
| CBARP   | 0.09523809524 | 0.09523809524 | 0.11111111111 | 0.11111111111 | 0.6842105263 | 0.8571428571 |
| BFA2T0  | 0.09523809524 | 0.09523809524 | 0.11111111111 | 0.11111111111 | 0.6842105263 | 0.8571428571 |
| BFA2T1  | 0.1904761905  | 0.1904761905  | 0             | 0             | inf          | 1.90476E+32  |
| CBFB    | 0.1428571429  | 0.1428571429  | 0.05555555556 | 0.05555555556 | 2.3333333333 | 2.571428571  |
| CBLB    | 0.09523809524 | 0.09523809524 | 0.05555555556 | 0.05555555556 | 1.473684211  | 1.714285714  |
| CBLC    | 0.09523809524 | 0.09523809524 | 0.11111111111 | 0.11111111111 | 0.6842105263 | 0.8571428571 |
| CBL11   | 0.04761904762 | 0.04761904762 | 0.05555555556 | 0.05555555556 | 0.7          | 0.8571428571 |
| CBLN1   | 0.04761904762 | 0.04761904762 | 0             | 0             | inf          | 4.7619E+31   |
| CBLN4   | 0.09523809524 | 0.09523809524 | 0.16666666667 | 0.16666666667 | 0.4210526316 | 0.5714285714 |
| CBR1    | 0.04761904762 | 0.04761904762 | 0.16666666667 | 0.16666666667 | 0.2          | 0.2857142857 |
| CBR3    | 0.04761904762 | 0.04761904762 | 0.16666666667 | 0.16666666667 | 0.2          | 0.2857142857 |
| BR3-AS  | 0.04761904762 | 0.04761904762 | 0.16666666667 | 0.16666666667 | 0.2          | 0.2857142857 |
| CBR4    | 0             | 0             | 0.05555555556 | 0.05555555556 | 0            | 0            |
| CBS     | 0.04761904762 | 0.04761904762 | 0.16666666667 | 0.16666666667 | 0.2          | 0.2857142857 |
| CBSL    | 0.04761904762 | 0.04761904762 | 0.16666666667 | 0.16666666667 | 0.2          | 0.2857142857 |
| CBWD1   | 0.04761904762 | 0.04761904762 | 0.05555555556 | 0.05555555556 | 0.7          | 0.8571428571 |
| CBWD2   | 0             | 0             | 0.05555555556 | 0.05555555556 | 0            | 0            |
| CBWD3   | 0.09523809524 | 0.09523809524 | 0.22222222222 | 0.22222222222 | 0.2894736842 | 0.4285714286 |
| CBWD5   | 0.09523809524 | 0.09523809524 | 0.22222222222 | 0.22222222222 | 0.2894736842 | 0.4285714286 |
| CBWD6   | 0.09523809524 | 0.09523809524 | 0.22222222222 | 0.22222222222 | 0.2894736842 | 0.4285714286 |
| CBX1    | 0.1428571429  | 0.1428571429  | 0             | 0             | inf          | 1.42857E+32  |
| CBX2    | 0.04761904762 | 0.04761904762 | 0             | 0             | inf          | 4.7619E+31   |
| CBX3    | 0.04761904762 | 0.04761904762 | 0.22222222222 | 0.22222222222 | 0.1375       | 0.2142857143 |
| CBX3P2  | 0.09523809524 | 0.09523809524 | 0             | 0             | inf          | 9.52381E+31  |
| CBX4    | 0.04761904762 | 0.04761904762 | 0             | 0             | inf          | 4.7619E+31   |
| CBX5    | 0.04761904762 | 0.04761904762 | 0.05555555556 | 0.05555555556 | 0.7          | 0.8571428571 |
| CBX6    | 0.04761904762 | 0.04761904762 | 0.11111111111 | 0.11111111111 | 0.325        | 0.4285714286 |
| CBX7    | 0.04761904762 | 0.04761904762 | 0.11111111111 | 0.11111111111 | 0.325        | 0.4285714286 |
| CBX8    | 0.04761904762 | 0.04761904762 | 0             | 0             | inf          | 4.7619E+31   |
| CBY1    | 0.04761904762 | 0.04761904762 | 0.11111111111 | 0.11111111111 | 0.325        | 0.4285714286 |

|         |               |               |               |               |              |              |
|---------|---------------|---------------|---------------|---------------|--------------|--------------|
| CBY3    | 0.09523809524 | 0.09523809524 | 0.05555555556 | 0.05555555556 | 1.473684211  | 1.714285714  |
| CC2D1A  | 0.1428571429  | 0.1428571429  | 0.1111111111  | 0.1111111111  | 1.083333333  | 1.285714286  |
| CC2D1B  | 0.04761904762 | 0.04761904762 | 0.05555555556 | 0.05555555556 | 0.7          | 0.8571428571 |
| CC2D2A  | 0             | 0             | 0             | 0             |              | 0.00001      |
| CC2D2B  | 0.1428571429  | 0.1428571429  | 0             | 0             | inf          | 1.42857E+32  |
| CCAR1   | 0.1904761905  | 0.1904761905  | 0.05555555556 | 0.05555555556 | 3.294117647  | 3.428571429  |
| CCAR2   | 0.09523809524 | 0.09523809524 | 0.1111111111  | 0.1111111111  | 0.6842105263 | 0.8571428571 |
| CCAT1   | 0.09523809524 | 0.09523809524 | 0.1111111111  | 0.1111111111  | 0.6842105263 | 0.8571428571 |
| CCAT2   | 0.09523809524 | 0.09523809524 | 0.1111111111  | 0.1111111111  | 0.6842105263 | 0.8571428571 |
| CCBE1   | 0.09523809524 | 0.09523809524 | 0             | 0             | inf          | 9.52381E+31  |
| CDC102  | 0.04761904762 | 0.04761904762 | 0             | 0             | inf          | 4.7619E+31   |
| CDC10   | 0.1428571429  | 0.1428571429  | 0             | 0             | inf          | 1.42857E+32  |
| CDC10   | 0.1428571429  | 0.1428571429  | 0.1111111111  | 0.1111111111  | 1.083333333  | 1.285714286  |
| CDC10   | 0.09523809524 | 0.09523809524 | 0.05555555556 | 0.05555555556 | 1.473684211  | 1.714285714  |
| CDC10   | 0.09523809524 | 0.09523809524 | 0.05555555556 | 0.05555555556 | 1.473684211  | 1.714285714  |
| CDC11   | 0             | 0             | 0.05555555556 | 0.05555555556 | 0            | 0            |
| CDC11   | 0.04761904762 | 0.04761904762 | 0             | 0             | inf          | 4.7619E+31   |
| CDC11   | 0.04761904762 | 0.04761904762 | 0             | 0             | inf          | 4.7619E+31   |
| CDC11   | 0.09523809524 | 0.09523809524 | 0.1111111111  | 0.1111111111  | 0.6842105263 | 0.8571428571 |
| CDC11   | 0             | 0             | 0.05555555556 | 0.05555555556 | 0            | 0            |
| CDC11   | 0.04761904762 | 0.04761904762 | 0.05555555556 | 0.05555555556 | 0.7          | 0.8571428571 |
| CDC11   | 0.04761904762 | 0.04761904762 | 0.1111111111  | 0.1111111111  | 0.325        | 0.4285714286 |
| CDC12   | 0.1428571429  | 0.1428571429  | 0.1111111111  | 0.1111111111  | 1.083333333  | 1.285714286  |
| CDC12   | 0.04761904762 | 0.04761904762 | 0.05555555556 | 0.05555555556 | 0.7          | 0.8571428571 |
| CDC12   | 0.04761904762 | 0.04761904762 | 0.1666666667  | 0.1666666667  | 0.2          | 0.2857142857 |
| CDC12   | 0             | 0             | 0.05555555556 | 0.05555555556 | 0            | 0            |
| CCDC13  | 0.04761904762 | 0.04761904762 | 0             | 0             | inf          | 4.7619E+31   |
| DC13-A  | 0.04761904762 | 0.04761904762 | 0             | 0             | inf          | 4.7619E+31   |
| CDC13   | 0.1428571429  | 0.1428571429  | 0.1111111111  | 0.1111111111  | 1.083333333  | 1.285714286  |
| CDC13   | 0             | 0             | 0.1111111111  | 0.1111111111  | 0            | 0            |
| CDC13   | 0.04761904762 | 0.04761904762 | 0.05555555556 | 0.05555555556 | 0.7          | 0.8571428571 |
| CDC13   | 0.04761904762 | 0.04761904762 | 0             | 0             | inf          | 4.7619E+31   |
| CDC13   | 0             | 0             | 0.05555555556 | 0.05555555556 | 0            | 0            |
| CCDC14  | 0.04761904762 | 0.04761904762 | 0.05555555556 | 0.05555555556 | 0.7          | 0.8571428571 |
| CDC14   | 0             | 0             | 0.05555555556 | 0.05555555556 | 0            | 0            |
| CDC14   | 0             | 0             | 0.1111111111  | 0.1111111111  | 0            | 0            |
| CDC14   | 0             | 0             | 0.05555555556 | 0.05555555556 | 0            | 0            |
| CDC14   | 0.04761904762 | 0.04761904762 | 0.05555555556 | 0.05555555556 | 0.7          | 0.8571428571 |
| CDC14   | 0.04761904762 | 0.04761904762 | 0.1111111111  | 0.1111111111  | 0.325        | 0.4285714286 |
| DC144C  | 0.09523809524 | 0.09523809524 | 0.05555555556 | 0.05555555556 | 1.473684211  | 1.714285714  |
| DC144D  | 0.09523809524 | 0.09523809524 | 0.05555555556 | 0.05555555556 | 1.473684211  | 1.714285714  |
| C144NL  | 0.09523809524 | 0.09523809524 | 0.05555555556 | 0.05555555556 | 1.473684211  | 1.714285714  |
| CDC14   | 0.04761904762 | 0.04761904762 | 0.1111111111  | 0.1111111111  | 0.325        | 0.4285714286 |
| CCDC14  | 0             | 0             | 0.05555555556 | 0.05555555556 | 0            | 0            |
| DC148-A | 0             | 0             | 0.05555555556 | 0.05555555556 | 0            | 0            |
| CDC15   | 0             | 0             | 0.05555555556 | 0.05555555556 | 0            | 0            |
| CDC15   | 0.1428571429  | 0.1428571429  | 0.1111111111  | 0.1111111111  | 1.083333333  | 1.285714286  |
| CDC15   | 0.04761904762 | 0.04761904762 | 0.05555555556 | 0.05555555556 | 0.7          | 0.8571428571 |
| CDC15   | 0.09523809524 | 0.09523809524 | 0.2222222222  | 0.2222222222  | 0.2894736842 | 0.4285714286 |
| CDC15   | 0.09523809524 | 0.09523809524 | 0.1111111111  | 0.1111111111  | 0.6842105263 | 0.8571428571 |
| CDC15   | 0.04761904762 | 0.04761904762 | 0.1111111111  | 0.1111111111  | 0.325        | 0.4285714286 |

|         |               |               |               |               |              |              |
|---------|---------------|---------------|---------------|---------------|--------------|--------------|
| CDC150  | 0.04761904762 | 0.04761904762 | 0.05555555556 | 0.05555555556 | 0.7          | 0.8571428571 |
| CDC162  | 0             | 0             | 0             | 0             |              | 0.00001      |
| CDC160  | 0.04761904762 | 0.04761904762 | 0.05555555556 | 0.05555555556 | 0.7          | 0.8571428571 |
| CDC160  | 0.04761904762 | 0.04761904762 | 0.16666666667 | 0.16666666667 | 0.2          | 0.2857142857 |
| CDC160  | 0.04761904762 | 0.04761904762 | 0.05555555556 | 0.05555555556 | 0.7          | 0.8571428571 |
| CCDC170 | 0.04761904762 | 0.04761904762 | 0.05555555556 | 0.05555555556 | 0.7          | 0.8571428571 |
| CDC170  | 0.04761904762 | 0.04761904762 | 0.05555555556 | 0.05555555556 | 0.7          | 0.8571428571 |
| CDC170  | 0.2380952381  | 0.2380952381  | 0             | 0             | inf          | 2.38095E+32  |
| CDC170  | 0             | 0             | 0.05555555556 | 0.05555555556 | 0            | 0            |
| CDC170  | 0.04761904762 | 0.04761904762 | 0             | 0             | inf          | 4.7619E+31   |
| CDC170  | 0.09523809524 | 0.09523809524 | 0             | 0             | inf          | 9.52381E+31  |
| CCDC180 | 0.04761904762 | 0.04761904762 | 0.05555555556 | 0.05555555556 | 0.7          | 0.8571428571 |
| DC18-A  | 0.04761904762 | 0.04761904762 | 0.05555555556 | 0.05555555556 | 0.7          | 0.8571428571 |
| CDC180  | 0.04761904762 | 0.04761904762 | 0             | 0             | inf          | 4.7619E+31   |
| CDC180  | 0.1428571429  | 0.1428571429  | 0             | 0             | inf          | 1.42857E+32  |
| CDC180  | 0.09523809524 | 0.09523809524 | 0             | 0             | inf          | 9.52381E+31  |
| CDC180  | 0.1428571429  | 0.1428571429  | 0.05555555556 | 0.05555555556 | 2.333333333  | 2.571428571  |
| DC183-A | 0.1428571429  | 0.1428571429  | 0.05555555556 | 0.05555555556 | 2.333333333  | 2.571428571  |
| CDC180  | 0.04761904762 | 0.04761904762 | 0.05555555556 | 0.05555555556 | 0.7          | 0.8571428571 |
| CDC180  | 0.1428571429  | 0.1428571429  | 0.05555555556 | 0.05555555556 | 2.333333333  | 2.571428571  |
| CDC180  | 0.1428571429  | 0.1428571429  | 0.05555555556 | 0.05555555556 | 2.333333333  | 2.571428571  |
| CDC180  | 0.04761904762 | 0.04761904762 | 0.05555555556 | 0.05555555556 | 0.7          | 0.8571428571 |
| CDC180  | 0.04761904762 | 0.04761904762 | 0             | 0             | inf          | 4.7619E+31   |
| CDC190  | 0.1428571429  | 0.1428571429  | 0             | 0             | inf          | 1.42857E+32  |
| CDC190  | 0.09523809524 | 0.09523809524 | 0.05555555556 | 0.05555555556 | 1.473684211  | 1.714285714  |
| CDC190  | 0.04761904762 | 0.04761904762 | 0             | 0             | inf          | 4.7619E+31   |
| CDC190  | 0.04761904762 | 0.04761904762 | 0             | 0             | inf          | 4.7619E+31   |
| CCDC200 | 0.04761904762 | 0.04761904762 | 0             | 0             | inf          | 4.7619E+31   |
| CCDC240 | 0.04761904762 | 0.04761904762 | 0.05555555556 | 0.05555555556 | 0.7          | 0.8571428571 |
| CCDC250 | 0.04761904762 | 0.04761904762 | 0.1111111111  | 0.1111111111  | 0.325        | 0.4285714286 |
| CCDC260 | 0.04761904762 | 0.04761904762 | 0.1111111111  | 0.1111111111  | 0.325        | 0.4285714286 |
| CCDC270 | 0             | 0             | 0.05555555556 | 0.05555555556 | 0            | 0            |
| CDC280  | 0.04761904762 | 0.04761904762 | 0.1111111111  | 0.1111111111  | 0.325        | 0.4285714286 |
| CCDC300 | 0.09523809524 | 0.09523809524 | 0.1111111111  | 0.1111111111  | 0.6842105263 | 0.8571428571 |
| CCDC300 | 0.04761904762 | 0.04761904762 | 0.05555555556 | 0.05555555556 | 0.7          | 0.8571428571 |
| CCDC330 | 0.04761904762 | 0.04761904762 | 0.05555555556 | 0.05555555556 | 0.7          | 0.8571428571 |
| CCDC360 | 0.09523809524 | 0.09523809524 | 0             | 0             | inf          | 9.52381E+31  |
| DC37-I  | 0.04761904762 | 0.04761904762 | 0.05555555556 | 0.05555555556 | 0.7          | 0.8571428571 |
| CCDC380 | 0.04761904762 | 0.04761904762 | 0.05555555556 | 0.05555555556 | 0.7          | 0.8571428571 |
| CCDC390 | 0.1904761905  | 0.1904761905  | 0.05555555556 | 0.05555555556 | 3.294117647  | 3.428571429  |
| CCDC400 | 0.04761904762 | 0.04761904762 | 0             | 0             | inf          | 4.7619E+31   |
| CCDC420 | 0.04761904762 | 0.04761904762 | 0.05555555556 | 0.05555555556 | 0.7          | 0.8571428571 |
| CCDC430 | 0.09523809524 | 0.09523809524 | 0             | 0             | inf          | 9.52381E+31  |
| CCDC470 | 0.04761904762 | 0.04761904762 | 0             | 0             | inf          | 4.7619E+31   |
| CCDC500 | 0.09523809524 | 0.09523809524 | 0.05555555556 | 0.05555555556 | 1.473684211  | 1.714285714  |
| CCDC510 | 0.09523809524 | 0.09523809524 | 0             | 0             | inf          | 9.52381E+31  |
| CCDC540 | 0.09523809524 | 0.09523809524 | 0.05555555556 | 0.05555555556 | 1.473684211  | 1.714285714  |
| CCDC570 | 0.04761904762 | 0.04761904762 | 0             | 0             | inf          | 4.7619E+31   |
| CCDC580 | 0.09523809524 | 0.09523809524 | 0.05555555556 | 0.05555555556 | 1.473684211  | 1.714285714  |
| CCDC590 | 0.04761904762 | 0.04761904762 | 0.05555555556 | 0.05555555556 | 0.7          | 0.8571428571 |
| CCDC600 | 0.04761904762 | 0.04761904762 | 0.05555555556 | 0.05555555556 | 0.7          | 0.8571428571 |

|         |               |               |               |               |              |              |
|---------|---------------|---------------|---------------|---------------|--------------|--------------|
| CCDC60  | 0             | 0             | 0.05555555556 | 0.05555555556 | 0            | 0            |
| CCDC62  | 0.04761904762 | 0.04761904762 | 0.11111111111 | 0.11111111111 | 0.325        | 0.4285714286 |
| CCDC63  | 0             | 0             | 0.11111111111 | 0.11111111111 | 0            | 0            |
| CCDC65  | 0.04761904762 | 0.04761904762 | 0.05555555556 | 0.05555555556 | 0.7          | 0.8571428571 |
| CCDC66  | 0.04761904762 | 0.04761904762 | 0             | 0             | inf          | 4.7619E+31   |
| CCDC68  | 0.09523809524 | 0.09523809524 | 0.05555555556 | 0.05555555556 | 1.473684211  | 1.714285714  |
| CCDC70  | 0.09523809524 | 0.09523809524 | 0.22222222222 | 0.22222222222 | 0.2894736842 | 0.4285714286 |
| CCDC71  | 0.09523809524 | 0.09523809524 | 0             | 0             | inf          | 9.52381E+31  |
| CCDC71  | 0.04761904762 | 0.04761904762 | 0.05555555556 | 0.05555555556 | 0.7          | 0.8571428571 |
| CCDC73  | 0.04761904762 | 0.04761904762 | 0             | 0             | inf          | 4.7619E+31   |
| CCDC74  | 0             | 0             | 0.05555555556 | 0.05555555556 | 0            | 0            |
| CCDC74  | 0             | 0             | 0.05555555556 | 0.05555555556 | 0            | 0            |
| CCDC77  | 0.04761904762 | 0.04761904762 | 0.11111111111 | 0.11111111111 | 0.325        | 0.4285714286 |
| CCDC78  | 0.04761904762 | 0.04761904762 | 0.22222222222 | 0.22222222222 | 0.1375       | 0.2142857143 |
| CCDC80  | 0.09523809524 | 0.09523809524 | 0.11111111111 | 0.11111111111 | 0.6842105263 | 0.8571428571 |
| CCDC80  | 0.09523809524 | 0.09523809524 | 0.05555555556 | 0.05555555556 | 1.473684211  | 1.714285714  |
| CCDC85  | 0.04761904762 | 0.04761904762 | 0.05555555556 | 0.05555555556 | 0.7          | 0.8571428571 |
| CCDC88  | 0.04761904762 | 0.04761904762 | 0.05555555556 | 0.05555555556 | 0.7          | 0.8571428571 |
| CCDC90  | 0.09523809524 | 0.09523809524 | 0.11111111111 | 0.11111111111 | 0.6842105263 | 0.8571428571 |
| CCDC91  | 0.04761904762 | 0.04761904762 | 0.05555555556 | 0.05555555556 | 0.7          | 0.8571428571 |
| CCDC92  | 0.04761904762 | 0.04761904762 | 0.05555555556 | 0.05555555556 | 0.7          | 0.8571428571 |
| CCDC92  | 0             | 0             | 0.11111111111 | 0.11111111111 | 0            | 0            |
| CCDC93  | 0             | 0             | 0.05555555556 | 0.05555555556 | 0            | 0            |
| CCDC97  | 0.04761904762 | 0.04761904762 | 0.05555555556 | 0.05555555556 | 0.7          | 0.8571428571 |
| CCEPR   | 0.04761904762 | 0.04761904762 | 0.05555555556 | 0.05555555556 | 0.7          | 0.8571428571 |
| CCER1   | 0.04761904762 | 0.04761904762 | 0.05555555556 | 0.05555555556 | 0.7          | 0.8571428571 |
| CCER2   | 0.04761904762 | 0.04761904762 | 0.05555555556 | 0.05555555556 | 0.7          | 0.8571428571 |
| CCIN    | 0.09523809524 | 0.09523809524 | 0.05555555556 | 0.05555555556 | 1.473684211  | 1.714285714  |
| CCK     | 0.04761904762 | 0.04761904762 | 0             | 0             | inf          | 4.7619E+31   |
| CCKBR   | 0.04761904762 | 0.04761904762 | 0             | 0             | inf          | 4.7619E+31   |
| CCL1    | 0.04761904762 | 0.04761904762 | 0             | 0             | inf          | 4.7619E+31   |
| CCL11   | 0.04761904762 | 0.04761904762 | 0             | 0             | inf          | 4.7619E+31   |
| CCL13   | 0.04761904762 | 0.04761904762 | 0             | 0             | inf          | 4.7619E+31   |
| CCL14   | 0.09523809524 | 0.09523809524 | 0             | 0             | inf          | 9.52381E+31  |
| CCL15   | 0.09523809524 | 0.09523809524 | 0             | 0             | inf          | 9.52381E+31  |
| L15-CCL | 0.09523809524 | 0.09523809524 | 0             | 0             | inf          | 9.52381E+31  |
| CCL16   | 0.09523809524 | 0.09523809524 | 0             | 0             | inf          | 9.52381E+31  |
| CCL17   | 0.04761904762 | 0.04761904762 | 0             | 0             | inf          | 4.7619E+31   |
| CCL18   | 0.09523809524 | 0.09523809524 | 0             | 0             | inf          | 9.52381E+31  |
| CCL19   | 0.09523809524 | 0.09523809524 | 0.05555555556 | 0.05555555556 | 1.473684211  | 1.714285714  |
| CCL2    | 0.04761904762 | 0.04761904762 | 0             | 0             | inf          | 4.7619E+31   |
| CCL20   | 0             | 0             | 0.05555555556 | 0.05555555556 | 0            | 0            |
| CCL21   | 0.09523809524 | 0.09523809524 | 0.05555555556 | 0.05555555556 | 1.473684211  | 1.714285714  |
| CCL22   | 0.04761904762 | 0.04761904762 | 0             | 0             | inf          | 4.7619E+31   |
| CCL23   | 0.09523809524 | 0.09523809524 | 0             | 0             | inf          | 9.52381E+31  |
| CCL24   | 0.1428571429  | 0.1428571429  | 0.11111111111 | 0.11111111111 | 1.083333333  | 1.285714286  |
| CCL25   | 0.1428571429  | 0.1428571429  | 0.05555555556 | 0.05555555556 | 2.333333333  | 2.571428571  |
| CCL26   | 0.1428571429  | 0.1428571429  | 0.11111111111 | 0.11111111111 | 1.083333333  | 1.285714286  |
| CCL27   | 0.09523809524 | 0.09523809524 | 0.05555555556 | 0.05555555556 | 1.473684211  | 1.714285714  |
| CCL28   | 0.04761904762 | 0.04761904762 | 0.05555555556 | 0.05555555556 | 0.7          | 0.8571428571 |
| CCL3    | 0.09523809524 | 0.09523809524 | 0             | 0             | inf          | 9.52381E+31  |

|         |               |               |               |               |              |              |
|---------|---------------|---------------|---------------|---------------|--------------|--------------|
| CCL3L1  | 0.09523809524 | 0.09523809524 | 0.05555555556 | 0.05555555556 | 1.473684211  | 1.714285714  |
| CCL3L3  | 0.09523809524 | 0.09523809524 | 0.05555555556 | 0.05555555556 | 1.473684211  | 1.714285714  |
| CCL4    | 0.09523809524 | 0.09523809524 | 0             | 0             | inf          | 9.52381E+31  |
| CCL4L1  | 0.09523809524 | 0.09523809524 | 0.05555555556 | 0.05555555556 | 1.473684211  | 1.714285714  |
| CCL4L2  | 0.09523809524 | 0.09523809524 | 0.05555555556 | 0.05555555556 | 1.473684211  | 1.714285714  |
| CCL5    | 0.09523809524 | 0.09523809524 | 0             | 0             | inf          | 9.52381E+31  |
| CCL7    | 0.04761904762 | 0.04761904762 | 0             | 0             | inf          | 4.7619E+31   |
| CCL8    | 0.04761904762 | 0.04761904762 | 0             | 0             | inf          | 4.7619E+31   |
| CCM2    | 0.04761904762 | 0.04761904762 | 0.2222222222  | 0.2222222222  | 0.1375       | 0.2142857143 |
| CCM2L   | 0.09523809524 | 0.09523809524 | 0.1111111111  | 0.1111111111  | 0.6842105263 | 0.8571428571 |
| CCN1    | 0.04761904762 | 0.04761904762 | 0.05555555556 | 0.05555555556 | 0.7          | 0.8571428571 |
| CCN3    | 0.09523809524 | 0.09523809524 | 0.1666666667  | 0.1666666667  | 0.4210526316 | 0.5714285714 |
| CCN4    | 0.04761904762 | 0.04761904762 | 0.2222222222  | 0.2222222222  | 0.1375       | 0.2142857143 |
| CCN5    | 0.1428571429  | 0.1428571429  | 0.1666666667  | 0.1666666667  | 0.6666666667 | 0.8571428571 |
| CCNA2   | 0             | 0             | 0.05555555556 | 0.05555555556 | 0            | 0            |
| CCNB1   | 0.04761904762 | 0.04761904762 | 0.05555555556 | 0.05555555556 | 0.7          | 0.8571428571 |
| CCNB1IP | 0.04761904762 | 0.04761904762 | 0             | 0             | inf          | 4.7619E+31   |
| CCNB2   | 0.04761904762 | 0.04761904762 | 0.05555555556 | 0.05555555556 | 0.7          | 0.8571428571 |
| CCND2   | 0.04761904762 | 0.04761904762 | 0.1111111111  | 0.1111111111  | 0.325        | 0.4285714286 |
| CND2-A  | 0.04761904762 | 0.04761904762 | 0.1111111111  | 0.1111111111  | 0.325        | 0.4285714286 |
| CCND3   | 0.04761904762 | 0.04761904762 | 0.05555555556 | 0.05555555556 | 0.7          | 0.8571428571 |
| CCNE1   | 0.04761904762 | 0.04761904762 | 0.1666666667  | 0.1666666667  | 0.2          | 0.2857142857 |
| CCNE2   | 0.1904761905  | 0.1904761905  | 0.1111111111  | 0.1111111111  | 1.529411765  | 1.714285714  |
| CCNF    | 0.09523809524 | 0.09523809524 | 0.2222222222  | 0.2222222222  | 0.2894736842 | 0.4285714286 |
| CCNG1   | 0             | 0             | 0.05555555556 | 0.05555555556 | 0            | 0            |
| CCNG2   | 0.04761904762 | 0.04761904762 | 0.05555555556 | 0.05555555556 | 0.7          | 0.8571428571 |
| CCNH    | 0.04761904762 | 0.04761904762 | 0             | 0             | inf          | 4.7619E+31   |
| CCNI    | 0.04761904762 | 0.04761904762 | 0.05555555556 | 0.05555555556 | 0.7          | 0.8571428571 |
| CCNI2   | 0.04761904762 | 0.04761904762 | 0             | 0             | inf          | 4.7619E+31   |
| CCNJ    | 0.1428571429  | 0.1428571429  | 0             | 0             | inf          | 1.42857E+32  |
| CCNJL   | 0.04761904762 | 0.04761904762 | 0.05555555556 | 0.05555555556 | 0.7          | 0.8571428571 |
| CCNL1   | 0.1428571429  | 0.1428571429  | 0.05555555556 | 0.05555555556 | 2.333333333  | 2.571428571  |
| CCNL2   | 0             | 0             | 0.1111111111  | 0.1111111111  | 0            | 0            |
| CCNO    | 0.04761904762 | 0.04761904762 | 0.05555555556 | 0.05555555556 | 0.7          | 0.8571428571 |
| CCNT1   | 0.04761904762 | 0.04761904762 | 0.05555555556 | 0.05555555556 | 0.7          | 0.8571428571 |
| CCNT2   | 0.04761904762 | 0.04761904762 | 0.05555555556 | 0.05555555556 | 0.7          | 0.8571428571 |
| CNT2-A  | 0.04761904762 | 0.04761904762 | 0.05555555556 | 0.05555555556 | 0.7          | 0.8571428571 |
| CCNY    | 0.09523809524 | 0.09523809524 | 0.1666666667  | 0.1666666667  | 0.4210526316 | 0.5714285714 |
| CCNYL1  | 0             | 0             | 0.05555555556 | 0.05555555556 | 0            | 0            |
| CCNYL2  | 0.1428571429  | 0.1428571429  | 0.05555555556 | 0.05555555556 | 2.333333333  | 2.571428571  |
| CCNYL3  | 0.04761904762 | 0.04761904762 | 0             | 0             | inf          | 4.7619E+31   |
| CCP110  | 0.04761904762 | 0.04761904762 | 0             | 0             | inf          | 4.7619E+31   |
| CCPG1   | 0.04761904762 | 0.04761904762 | 0.05555555556 | 0.05555555556 | 0.7          | 0.8571428571 |
| CCR10   | 0.04761904762 | 0.04761904762 | 0             | 0             | inf          | 4.7619E+31   |
| CCR7    | 0.09523809524 | 0.09523809524 | 0             | 0             | inf          | 9.52381E+31  |
| CCR8    | 0.04761904762 | 0.04761904762 | 0             | 0             | inf          | 4.7619E+31   |
| CCSAP   | 0.1428571429  | 0.1428571429  | 0             | 0             | inf          | 1.42857E+32  |
| CCSER1  | 0             | 0             | 0.05555555556 | 0.05555555556 | 0            | 0            |
| CCSER2  | 0.1428571429  | 0.1428571429  | 0             | 0             | inf          | 1.42857E+32  |
| CCT2    | 0.09523809524 | 0.09523809524 | 0.1111111111  | 0.1111111111  | 0.6842105263 | 0.8571428571 |
| CCT4    | 0.04761904762 | 0.04761904762 | 0.05555555556 | 0.05555555556 | 0.7          | 0.8571428571 |



|          |               |               |               |               |             |              |
|----------|---------------|---------------|---------------|---------------|-------------|--------------|
| CCT5     | 0.04761904762 | 0.04761904762 | 0.05555555556 | 0.05555555556 | 0.7         | 0.8571428571 |
| CCT6A    | 0.2380952381  | 0.2380952381  | 0.2222222222  | 0.2222222222  | 0.859375    | 1.071428571  |
| CCT6B    | 0.04761904762 | 0.04761904762 | 0             | 0             | inf         | 4.7619E+31   |
| CCT6P1   | 0.04761904762 | 0.04761904762 | 0.1111111111  | 0.1111111111  | 0.325       | 0.4285714286 |
| CCT6P3   | 0.04761904762 | 0.04761904762 | 0.1111111111  | 0.1111111111  | 0.325       | 0.4285714286 |
| CCT7     | 0             | 0             | 0.05555555556 | 0.05555555556 | 0           | 0            |
| CCT8     | 0.04761904762 | 0.04761904762 | 0.1111111111  | 0.1111111111  | 0.325       | 0.4285714286 |
| CCT8L2   | 0.04761904762 | 0.04761904762 | 0             | 0             | inf         | 4.7619E+31   |
| CCZ1     | 0.04761904762 | 0.04761904762 | 0.1666666667  | 0.1666666667  | 0.2         | 0.2857142857 |
| CCZ1B    | 0.04761904762 | 0.04761904762 | 0.1666666667  | 0.1666666667  | 0.2         | 0.2857142857 |
| IP-OR7   | 0.04761904762 | 0.04761904762 | 0.05555555556 | 0.05555555556 | 0.7         | 0.8571428571 |
| CD101    | 0.04761904762 | 0.04761904762 | 0.05555555556 | 0.05555555556 | 0.7         | 0.8571428571 |
| CD109    | 0.04761904762 | 0.04761904762 | 0             | 0             | inf         | 4.7619E+31   |
| CD14     | 0.04761904762 | 0.04761904762 | 0             | 0             | inf         | 4.7619E+31   |
| CD151    | 0.04761904762 | 0.04761904762 | 0             | 0             | inf         | 4.7619E+31   |
| CD160    | 0.1428571429  | 0.1428571429  | 0.05555555556 | 0.05555555556 | 2.333333333 | 2.571428571  |
| CD163    | 0.04761904762 | 0.04761904762 | 0.1111111111  | 0.1111111111  | 0.325       | 0.4285714286 |
| CD163L   | 0.04761904762 | 0.04761904762 | 0.1111111111  | 0.1111111111  | 0.325       | 0.4285714286 |
| CD164    | 0             | 0             | 0             | 0             |             | 0.00001      |
| CD164L   | 0.04761904762 | 0.04761904762 | 0.1111111111  | 0.1111111111  | 0.325       | 0.4285714286 |
| CD177    | 0.04761904762 | 0.04761904762 | 0.05555555556 | 0.05555555556 | 0.7         | 0.8571428571 |
| CD180    | 0.04761904762 | 0.04761904762 | 0             | 0             | inf         | 4.7619E+31   |
| CD19     | 0.04761904762 | 0.04761904762 | 0             | 0             | inf         | 4.7619E+31   |
| CD1A     | 0.1428571429  | 0.1428571429  | 0.05555555556 | 0.05555555556 | 2.333333333 | 2.571428571  |
| CD1B     | 0.1428571429  | 0.1428571429  | 0.05555555556 | 0.05555555556 | 2.333333333 | 2.571428571  |
| CD1C     | 0.1428571429  | 0.1428571429  | 0.05555555556 | 0.05555555556 | 2.333333333 | 2.571428571  |
| CD1D     | 0.1428571429  | 0.1428571429  | 0.05555555556 | 0.05555555556 | 2.333333333 | 2.571428571  |
| CD1E     | 0.1428571429  | 0.1428571429  | 0.05555555556 | 0.05555555556 | 2.333333333 | 2.571428571  |
| CD2      | 0.04761904762 | 0.04761904762 | 0.05555555556 | 0.05555555556 | 0.7         | 0.8571428571 |
| CD200    | 0.09523809524 | 0.09523809524 | 0.05555555556 | 0.05555555556 | 1.473684211 | 1.714285714  |
| CD200R   | 0.09523809524 | 0.09523809524 | 0.05555555556 | 0.05555555556 | 1.473684211 | 1.714285714  |
| CD200R1  | 0.09523809524 | 0.09523809524 | 0.05555555556 | 0.05555555556 | 1.473684211 | 1.714285714  |
| CD200R1L | 0.09523809524 | 0.09523809524 | 0.05555555556 | 0.05555555556 | 1.473684211 | 1.714285714  |
| CD209    | 0.1428571429  | 0.1428571429  | 0.05555555556 | 0.05555555556 | 2.333333333 | 2.571428571  |
| CD22     | 0.04761904762 | 0.04761904762 | 0.05555555556 | 0.05555555556 | 0.7         | 0.8571428571 |
| CD244    | 0.1428571429  | 0.1428571429  | 0             | 0             | inf         | 1.42857E+32  |
| CD247    | 0.1428571429  | 0.1428571429  | 0             | 0             | inf         | 1.42857E+32  |
| CD27     | 0.04761904762 | 0.04761904762 | 0.1111111111  | 0.1111111111  | 0.325       | 0.4285714286 |
| CD27-AS  | 0.04761904762 | 0.04761904762 | 0.1111111111  | 0.1111111111  | 0.325       | 0.4285714286 |
| CD274    | 0.04761904762 | 0.04761904762 | 0.05555555556 | 0.05555555556 | 0.7         | 0.8571428571 |
| CD276    | 0.04761904762 | 0.04761904762 | 0.05555555556 | 0.05555555556 | 0.7         | 0.8571428571 |
| CD28     | 0             | 0             | 0.05555555556 | 0.05555555556 | 0           | 0            |
| CD2AP    | 0.04761904762 | 0.04761904762 | 0.05555555556 | 0.05555555556 | 0.7         | 0.8571428571 |
| CD2BP2   | 0.04761904762 | 0.04761904762 | 0             | 0             | inf         | 4.7619E+31   |
| CD300A   | 0.04761904762 | 0.04761904762 | 0             | 0             | inf         | 4.7619E+31   |
| CD300C   | 0.04761904762 | 0.04761904762 | 0             | 0             | inf         | 4.7619E+31   |
| CD300E   | 0.04761904762 | 0.04761904762 | 0             | 0             | inf         | 4.7619E+31   |
| CD300H   | 0.04761904762 | 0.04761904762 | 0             | 0             | inf         | 4.7619E+31   |
| CD300L   | 0.04761904762 | 0.04761904762 | 0             | 0             | inf         | 4.7619E+31   |
| CD300LI  | 0.04761904762 | 0.04761904762 | 0             | 0             | inf         | 4.7619E+31   |
| CD300LII | 0.04761904762 | 0.04761904762 | 0             | 0             | inf         | 4.7619E+31   |

|               |               |               |               |               |              |              |
|---------------|---------------|---------------|---------------|---------------|--------------|--------------|
| <b>D300L</b>  | 0.09523809524 | 0.09523809524 | 0             | 0             | inf          | 9.52381E+31  |
| <b>CD302</b>  | 0             | 0             | 0.05555555556 | 0.05555555556 | 0            | 0            |
| <b>CD320</b>  | 0.1428571429  | 0.1428571429  | 0.05555555556 | 0.05555555556 | 2.333333333  | 2.571428571  |
| <b>CD34</b>   | 0.1428571429  | 0.1428571429  | 0             | 0             | inf          | 1.42857E+32  |
| <b>CD36</b>   | 0.04761904762 | 0.04761904762 | 0.1111111111  | 0.1111111111  | 0.325        | 0.4285714286 |
| <b>CD37</b>   | 0.09523809524 | 0.09523809524 | 0.1111111111  | 0.1111111111  | 0.6842105263 | 0.8571428571 |
| <b>CD38</b>   | 0             | 0             | 0             | 0             |              | 0.00001      |
| <b>CD3EAF</b> | 0.09523809524 | 0.09523809524 | 0.1111111111  | 0.1111111111  | 0.6842105263 | 0.8571428571 |
| <b>CD4</b>    | 0.04761904762 | 0.04761904762 | 0.1111111111  | 0.1111111111  | 0.325        | 0.4285714286 |
| <b>CD40</b>   | 0.1428571429  | 0.1428571429  | 0.1666666667  | 0.1666666667  | 0.6666666667 | 0.8571428571 |
| <b>CD46</b>   | 0.1428571429  | 0.1428571429  | 0             | 0             | inf          | 1.42857E+32  |
| <b>CD47</b>   | 0.09523809524 | 0.09523809524 | 0.05555555556 | 0.05555555556 | 1.473684211  | 1.714285714  |
| <b>CD48</b>   | 0.1428571429  | 0.1428571429  | 0             | 0             | inf          | 1.42857E+32  |
| <b>CD52</b>   | 0.04761904762 | 0.04761904762 | 0.1111111111  | 0.1111111111  | 0.325        | 0.4285714286 |
| <b>CD53</b>   | 0.04761904762 | 0.04761904762 | 0             | 0             | inf          | 4.7619E+31   |
| <b>CD55</b>   | 0.1428571429  | 0.1428571429  | 0             | 0             | inf          | 1.42857E+32  |
| <b>CD58</b>   | 0.04761904762 | 0.04761904762 | 0.05555555556 | 0.05555555556 | 0.7          | 0.8571428571 |
| <b>CD5L</b>   | 0.1428571429  | 0.1428571429  | 0.05555555556 | 0.05555555556 | 2.333333333  | 2.571428571  |
| <b>CD63</b>   | 0.04761904762 | 0.04761904762 | 0.05555555556 | 0.05555555556 | 0.7          | 0.8571428571 |
| <b>CD68</b>   | 0             | 0             | 0.05555555556 | 0.05555555556 | 0            | 0            |
| <b>CD69</b>   | 0.04761904762 | 0.04761904762 | 0.1111111111  | 0.1111111111  | 0.325        | 0.4285714286 |
| <b>CD7</b>    | 0.04761904762 | 0.04761904762 | 0             | 0             | inf          | 4.7619E+31   |
| <b>CD70</b>   | 0.1428571429  | 0.1428571429  | 0.05555555556 | 0.05555555556 | 2.333333333  | 2.571428571  |
| <b>CD72</b>   | 0.09523809524 | 0.09523809524 | 0.05555555556 | 0.05555555556 | 1.473684211  | 1.714285714  |
| <b>CD79A</b>  | 0.04761904762 | 0.04761904762 | 0.05555555556 | 0.05555555556 | 0.7          | 0.8571428571 |
| <b>CD79B</b>  | 0.04761904762 | 0.04761904762 | 0             | 0             | inf          | 4.7619E+31   |
| <b>CD80</b>   | 0.09523809524 | 0.09523809524 | 0.05555555556 | 0.05555555556 | 1.473684211  | 1.714285714  |
| <b>CD81</b>   | 0.04761904762 | 0.04761904762 | 0             | 0             | inf          | 4.7619E+31   |
| <b>D81-AS</b> | 0.04761904762 | 0.04761904762 | 0             | 0             | inf          | 4.7619E+31   |
| <b>CD84</b>   | 0.1428571429  | 0.1428571429  | 0             | 0             | inf          | 1.42857E+32  |
| <b>CD86</b>   | 0.09523809524 | 0.09523809524 | 0.05555555556 | 0.05555555556 | 1.473684211  | 1.714285714  |
| <b>CD8A</b>   | 0             | 0             | 0.05555555556 | 0.05555555556 | 0            | 0            |
| <b>CD8B</b>   | 0             | 0             | 0.05555555556 | 0.05555555556 | 0            | 0            |
| <b>CD8B2</b>  | 0             | 0             | 0.05555555556 | 0.05555555556 | 0            | 0            |
| <b>CD9</b>    | 0.04761904762 | 0.04761904762 | 0.1111111111  | 0.1111111111  | 0.325        | 0.4285714286 |
| <b>CD93</b>   | 0.1904761905  | 0.1904761905  | 0.05555555556 | 0.05555555556 | 3.294117647  | 3.428571429  |
| <b>CD96</b>   | 0.09523809524 | 0.09523809524 | 0.05555555556 | 0.05555555556 | 1.473684211  | 1.714285714  |
| <b>CDA</b>    | 0.04761904762 | 0.04761904762 | 0.1111111111  | 0.1111111111  | 0.325        | 0.4285714286 |
| <b>CDC123</b> | 0.09523809524 | 0.09523809524 | 0.1111111111  | 0.1111111111  | 0.6842105263 | 0.8571428571 |
| <b>CDC14A</b> | 0.04761904762 | 0.04761904762 | 0.05555555556 | 0.05555555556 | 0.7          | 0.8571428571 |
| <b>CDC14B</b> | 0.04761904762 | 0.04761904762 | 0.05555555556 | 0.05555555556 | 0.7          | 0.8571428571 |
| <b>CDC14C</b> | 0.09523809524 | 0.09523809524 | 0.2222222222  | 0.2222222222  | 0.2894736842 | 0.4285714286 |
| <b>CDC20</b>  | 0.04761904762 | 0.04761904762 | 0.05555555556 | 0.05555555556 | 0.7          | 0.8571428571 |
| <b>CDC20B</b> | 0.04761904762 | 0.04761904762 | 0.05555555556 | 0.05555555556 | 0.7          | 0.8571428571 |
| <b>CDC23</b>  | 0.04761904762 | 0.04761904762 | 0             | 0             | inf          | 4.7619E+31   |
| <b>CDC25A</b> | 0.09523809524 | 0.09523809524 | 0             | 0             | inf          | 9.52381E+31  |
| <b>CDC25B</b> | 0.1904761905  | 0.1904761905  | 0.05555555556 | 0.05555555556 | 3.294117647  | 3.428571429  |
| <b>CDC25C</b> | 0.04761904762 | 0.04761904762 | 0             | 0             | inf          | 4.7619E+31   |
| <b>CDC26</b>  | 0.04761904762 | 0.04761904762 | 0.05555555556 | 0.05555555556 | 0.7          | 0.8571428571 |
| <b>CDC27</b>  | 0.1428571429  | 0.1428571429  | 0             | 0             | inf          | 1.42857E+32  |
| <b>CDC34</b>  | 0.09523809524 | 0.09523809524 | 0.1111111111  | 0.1111111111  | 0.6842105263 | 0.8571428571 |

|         |               |               |               |               |              |              |
|---------|---------------|---------------|---------------|---------------|--------------|--------------|
| CDC37   | 0.1428571429  | 0.1428571429  | 0.1111111111  | 0.1111111111  | 1.083333333  | 1.285714286  |
| DC37L   | 0.04761904762 | 0.04761904762 | 0.05555555556 | 0.05555555556 | 0.7          | 0.8571428571 |
| C37L1-  | 0.04761904762 | 0.04761904762 | 0.05555555556 | 0.05555555556 | 0.7          | 0.8571428571 |
| CDC40   | 0             | 0             | 0             | 0             |              | 0.00001      |
| CDC42   | 0.04761904762 | 0.04761904762 | 0.1111111111  | 0.1111111111  | 0.325        | 0.4285714286 |
| DC42BP  | 0.1428571429  | 0.1428571429  | 0             | 0             | inf          | 1.42857E+32  |
| DC42EP  | 0             | 0             | 0.1111111111  | 0.1111111111  | 0            | 0            |
| DC42EP  | 0             | 0             | 0.05555555556 | 0.05555555556 | 0            | 0            |
| DC42EP  | 0.04761904762 | 0.04761904762 | 0             | 0             | inf          | 4.7619E+31   |
| DC42EP  | 0.09523809524 | 0.09523809524 | 0.05555555556 | 0.05555555556 | 1.473684211  | 1.714285714  |
| DC42P3  | 0.04761904762 | 0.04761904762 | 0.1666666667  | 0.1666666667  | 0.2          | 0.2857142857 |
| DC42SE  | 0.1904761905  | 0.1904761905  | 0.05555555556 | 0.05555555556 | 3.294117647  | 3.428571429  |
| DC42SE  | 0.04761904762 | 0.04761904762 | 0             | 0             | inf          | 4.7619E+31   |
| CDC45   | 0.04761904762 | 0.04761904762 | 0.05555555556 | 0.05555555556 | 0.7          | 0.8571428571 |
| CDC5L   | 0.04761904762 | 0.04761904762 | 0.05555555556 | 0.05555555556 | 0.7          | 0.8571428571 |
| CDC6    | 0.09523809524 | 0.09523809524 | 0             | 0             | inf          | 9.52381E+31  |
| CDC7    | 0.04761904762 | 0.04761904762 | 0.05555555556 | 0.05555555556 | 0.7          | 0.8571428571 |
| CDC73   | 0.1428571429  | 0.1428571429  | 0             | 0             | inf          | 1.42857E+32  |
| CDCA2   | 0.04761904762 | 0.04761904762 | 0.1111111111  | 0.1111111111  | 0.325        | 0.4285714286 |
| CDCA3   | 0.04761904762 | 0.04761904762 | 0.1111111111  | 0.1111111111  | 0.325        | 0.4285714286 |
| CDCA7   | 0             | 0             | 0.1111111111  | 0.1111111111  | 0            | 0            |
| CDCA7L  | 0.04761904762 | 0.04761904762 | 0.1666666667  | 0.1666666667  | 0.2          | 0.2857142857 |
| CDCA8   | 0.04761904762 | 0.04761904762 | 0.05555555556 | 0.05555555556 | 0.7          | 0.8571428571 |
| CDCP2   | 0.04761904762 | 0.04761904762 | 0.05555555556 | 0.05555555556 | 0.7          | 0.8571428571 |
| CDH1    | 0.1428571429  | 0.1428571429  | 0.05555555556 | 0.05555555556 | 2.333333333  | 2.571428571  |
| CDH10   | 0.04761904762 | 0.04761904762 | 0.05555555556 | 0.05555555556 | 0.7          | 0.8571428571 |
| CDH11   | 0.04761904762 | 0.04761904762 | 0.05555555556 | 0.05555555556 | 0.7          | 0.8571428571 |
| CDH12   | 0.04761904762 | 0.04761904762 | 0.1111111111  | 0.1111111111  | 0.325        | 0.4285714286 |
| CDH13   | 0.04761904762 | 0.04761904762 | 0             | 0             | inf          | 4.7619E+31   |
| CDH15   | 0.09523809524 | 0.09523809524 | 0             | 0             | inf          | 9.52381E+31  |
| CDH16   | 0.09523809524 | 0.09523809524 | 0.05555555556 | 0.05555555556 | 1.473684211  | 1.714285714  |
| CDH17   | 0.1904761905  | 0.1904761905  | 0.1111111111  | 0.1111111111  | 1.529411765  | 1.714285714  |
| CDH18   | 0.04761904762 | 0.04761904762 | 0.1111111111  | 0.1111111111  | 0.325        | 0.4285714286 |
| DH18-A5 | 0.04761904762 | 0.04761904762 | 0.05555555556 | 0.05555555556 | 0.7          | 0.8571428571 |
| CDH2    | 0.09523809524 | 0.09523809524 | 0             | 0             | inf          | 9.52381E+31  |
| CDH20   | 0.09523809524 | 0.09523809524 | 0             | 0             | inf          | 9.52381E+31  |
| CDH22   | 0.1428571429  | 0.1428571429  | 0.1666666667  | 0.1666666667  | 0.6666666667 | 0.8571428571 |
| CDH23   | 0.1428571429  | 0.1428571429  | 0             | 0             | inf          | 1.42857E+32  |
| DH23-A5 | 0.09523809524 | 0.09523809524 | 0             | 0             | inf          | 9.52381E+31  |
| CDH24   | 0             | 0             | 0.05555555556 | 0.05555555556 | 0            | 0            |
| CDH26   | 0.1428571429  | 0.1428571429  | 0.1666666667  | 0.1666666667  | 0.6666666667 | 0.8571428571 |
| CDH3    | 0.1428571429  | 0.1428571429  | 0.05555555556 | 0.05555555556 | 2.333333333  | 2.571428571  |
| CDH4    | 0.1428571429  | 0.1428571429  | 0.1111111111  | 0.1111111111  | 1.083333333  | 1.285714286  |
| CDH5    | 0.04761904762 | 0.04761904762 | 0             | 0             | inf          | 4.7619E+31   |
| CDH6    | 0.04761904762 | 0.04761904762 | 0.05555555556 | 0.05555555556 | 0.7          | 0.8571428571 |
| CDH8    | 0.04761904762 | 0.04761904762 | 0             | 0             | inf          | 4.7619E+31   |
| CDH9    | 0.04761904762 | 0.04761904762 | 0.05555555556 | 0.05555555556 | 0.7          | 0.8571428571 |
| CDHR1   | 0.1428571429  | 0.1428571429  | 0             | 0             | inf          | 1.42857E+32  |
| CDHR2   | 0.09523809524 | 0.09523809524 | 0.05555555556 | 0.05555555556 | 1.473684211  | 1.714285714  |
| CDHR3   | 0.04761904762 | 0.04761904762 | 0.05555555556 | 0.05555555556 | 0.7          | 0.8571428571 |
| CDHR4   | 0.09523809524 | 0.09523809524 | 0             | 0             | inf          | 9.52381E+31  |

|        |               |               |               |               |              |              |
|--------|---------------|---------------|---------------|---------------|--------------|--------------|
| CDHR5  | 0.04761904762 | 0.04761904762 | 0             | 0             | inf          | 4.7619E+31   |
| CDIP1  | 0.04761904762 | 0.04761904762 | 0             | 0             | inf          | 4.7619E+31   |
| CDIPT  | 0.04761904762 | 0.04761904762 | 0             | 0             | inf          | 4.7619E+31   |
| DIPTOS | 0.04761904762 | 0.04761904762 | 0             | 0             | inf          | 4.7619E+31   |
| CDK1   | 0.04761904762 | 0.04761904762 | 0.1111111111  | 0.1111111111  | 0.325        | 0.4285714286 |
| CDK10  | 0.09523809524 | 0.09523809524 | 0             | 0             | inf          | 9.52381E+31  |
| CDK11A | 0             | 0             | 0.1111111111  | 0.1111111111  | 0            | 0            |
| CDK11B | 0             | 0             | 0.1111111111  | 0.1111111111  | 0            | 0            |
| CDK12  | 0.09523809524 | 0.09523809524 | 0             | 0             | inf          | 9.52381E+31  |
| CDK13  | 0.04761904762 | 0.04761904762 | 0.2222222222  | 0.2222222222  | 0.1375       | 0.2142857143 |
| CDK14  | 0.09523809524 | 0.09523809524 | 0.1111111111  | 0.1111111111  | 0.6842105263 | 0.8571428571 |
| CDK15  | 0             | 0             | 0.05555555556 | 0.05555555556 | 0            | 0            |
| CDK17  | 0.04761904762 | 0.04761904762 | 0.05555555556 | 0.05555555556 | 0.7          | 0.8571428571 |
| CDK18  | 0.1428571429  | 0.1428571429  | 0             | 0             | inf          | 1.42857E+32  |
| CDK19  | 0             | 0             | 0             | 0             |              | 0.00001      |
| CDK2   | 0.09523809524 | 0.09523809524 | 0.05555555556 | 0.05555555556 | 1.473684211  | 1.714285714  |
| CDK20  | 0             | 0             | 0.05555555556 | 0.05555555556 | 0            | 0            |
| DK2AP  | 0.04761904762 | 0.04761904762 | 0.1111111111  | 0.1111111111  | 0.325        | 0.4285714286 |
| CDK3   | 0.04761904762 | 0.04761904762 | 0             | 0             | inf          | 4.7619E+31   |
| CDK4   | 0.1428571429  | 0.1428571429  | 0.05555555556 | 0.05555555556 | 2.333333333  | 2.571428571  |
| CDK5   | 0.09523809524 | 0.09523809524 | 0.05555555556 | 0.05555555556 | 1.473684211  | 1.714285714  |
| CDK5R1 | 0             | 0             | 0             | 0             |              | 0.00001      |
| CDK5R2 | 0             | 0             | 0.05555555556 | 0.05555555556 | 0            | 0            |
| DK5RA1 | 0.09523809524 | 0.09523809524 | 0.1111111111  | 0.1111111111  | 0.6842105263 | 0.8571428571 |
| DK5RA1 | 0.09523809524 | 0.09523809524 | 0.05555555556 | 0.05555555556 | 1.473684211  | 1.714285714  |
| DK5RA1 | 0.1428571429  | 0.1428571429  | 0             | 0             | inf          | 1.42857E+32  |
| CDK6   | 0.04761904762 | 0.04761904762 | 0.1111111111  | 0.1111111111  | 0.325        | 0.4285714286 |
| CDK7   | 0.04761904762 | 0.04761904762 | 0.05555555556 | 0.05555555556 | 0.7          | 0.8571428571 |
| CDK9   | 0.09523809524 | 0.09523809524 | 0.05555555556 | 0.05555555556 | 1.473684211  | 1.714285714  |
| CDKL1  | 0.04761904762 | 0.04761904762 | 0             | 0             | inf          | 4.7619E+31   |
| CDKL2  | 0.04761904762 | 0.04761904762 | 0.05555555556 | 0.05555555556 | 0.7          | 0.8571428571 |
| CDKL3  | 0.04761904762 | 0.04761904762 | 0             | 0             | inf          | 4.7619E+31   |
| CDKL4  | 0             | 0             | 0.05555555556 | 0.05555555556 | 0            | 0            |
| CDKN1A | 0.04761904762 | 0.04761904762 | 0.05555555556 | 0.05555555556 | 0.7          | 0.8571428571 |
| CDKN1B | 0.04761904762 | 0.04761904762 | 0.05555555556 | 0.05555555556 | 0.7          | 0.8571428571 |
| CDKN1C | 0.04761904762 | 0.04761904762 | 0             | 0             | inf          | 4.7619E+31   |
| DKN2A1 | 0             | 0             | 0.05555555556 | 0.05555555556 | 0            | 0            |
| KN2AIP | 0.04761904762 | 0.04761904762 | 0             | 0             | inf          | 4.7619E+31   |
| KN2B-A | 0.09523809524 | 0.09523809524 | 0.1111111111  | 0.1111111111  | 0.6842105263 | 0.8571428571 |
| CDKN2C | 0.04761904762 | 0.04761904762 | 0.05555555556 | 0.05555555556 | 0.7          | 0.8571428571 |
| CDKN2D | 0.1428571429  | 0.1428571429  | 0.1111111111  | 0.1111111111  | 1.083333333  | 1.285714286  |
| CDKN3  | 0.04761904762 | 0.04761904762 | 0             | 0             | inf          | 4.7619E+31   |
| CDNF   | 0.09523809524 | 0.09523809524 | 0.1111111111  | 0.1111111111  | 0.6842105263 | 0.8571428571 |
| CDO1   | 0.04761904762 | 0.04761904762 | 0             | 0             | inf          | 4.7619E+31   |
| CDPF1  | 0             | 0             | 0.1111111111  | 0.1111111111  | 0            | 0            |
| CDR2   | 0.04761904762 | 0.04761904762 | 0             | 0             | inf          | 4.7619E+31   |
| CDR2L  | 0.04761904762 | 0.04761904762 | 0             | 0             | inf          | 4.7619E+31   |
| CDRT1  | 0.04761904762 | 0.04761904762 | 0.05555555556 | 0.05555555556 | 0.7          | 0.8571428571 |
| CDRT15 | 0.04761904762 | 0.04761904762 | 0.05555555556 | 0.05555555556 | 0.7          | 0.8571428571 |
| DRT15L | 0.09523809524 | 0.09523809524 | 0.05555555556 | 0.05555555556 | 1.473684211  | 1.714285714  |
| DRT15P | 0.04761904762 | 0.04761904762 | 0.05555555556 | 0.05555555556 | 0.7          | 0.8571428571 |

|         |               |               |               |               |              |              |
|---------|---------------|---------------|---------------|---------------|--------------|--------------|
| DRT15F  | 0.04761904762 | 0.04761904762 | 0.05555555556 | 0.05555555556 | 0.7          | 0.8571428571 |
| CDRT3   | 0.04761904762 | 0.04761904762 | 0.05555555556 | 0.05555555556 | 0.7          | 0.8571428571 |
| CDRT4   | 0.04761904762 | 0.04761904762 | 0.05555555556 | 0.05555555556 | 0.7          | 0.8571428571 |
| CDRT7   | 0.04761904762 | 0.04761904762 | 0.05555555556 | 0.05555555556 | 0.7          | 0.8571428571 |
| CDRT8   | 0.04761904762 | 0.04761904762 | 0.05555555556 | 0.05555555556 | 0.7          | 0.8571428571 |
| CDS1    | 0             | 0             | 0.05555555556 | 0.05555555556 | 0            | 0            |
| CDS2    | 0.1904761905  | 0.1904761905  | 0.05555555556 | 0.05555555556 | 3.294117647  | 3.428571429  |
| CDT1    | 0.1904761905  | 0.1904761905  | 0             | 0             | inf          | 1.90476E+32  |
| CDV3    | 0.1428571429  | 0.1428571429  | 0.05555555556 | 0.05555555556 | 2.333333333  | 2.571428571  |
| CDYL2   | 0.09523809524 | 0.09523809524 | 0             | 0             | inf          | 9.52381E+31  |
| EACAM0  | 0.04761904762 | 0.04761904762 | 0.05555555556 | 0.05555555556 | 0.7          | 0.8571428571 |
| EACAM0  | 0.09523809524 | 0.09523809524 | 0.05555555556 | 0.05555555556 | 1.473684211  | 1.714285714  |
| EACAM0  | 0.09523809524 | 0.09523809524 | 0.05555555556 | 0.05555555556 | 1.473684211  | 1.714285714  |
| EACAM0  | 0.09523809524 | 0.09523809524 | 0.05555555556 | 0.05555555556 | 1.473684211  | 1.714285714  |
| EACAM0  | 0.04761904762 | 0.04761904762 | 0.05555555556 | 0.05555555556 | 0.7          | 0.8571428571 |
| ACAM20  | 0.09523809524 | 0.09523809524 | 0.05555555556 | 0.05555555556 | 1.473684211  | 1.714285714  |
| EACAM0  | 0.04761904762 | 0.04761904762 | 0.05555555556 | 0.05555555556 | 0.7          | 0.8571428571 |
| EACAM0  | 0.04761904762 | 0.04761904762 | 0.05555555556 | 0.05555555556 | 0.7          | 0.8571428571 |
| EACAM0  | 0.04761904762 | 0.04761904762 | 0.05555555556 | 0.05555555556 | 0.7          | 0.8571428571 |
| EACAM0  | 0.04761904762 | 0.04761904762 | 0.05555555556 | 0.05555555556 | 0.7          | 0.8571428571 |
| EACAM0  | 0.04761904762 | 0.04761904762 | 0.05555555556 | 0.05555555556 | 0.7          | 0.8571428571 |
| EACAM0  | 0.04761904762 | 0.04761904762 | 0.05555555556 | 0.05555555556 | 0.7          | 0.8571428571 |
| CEBPA   | 0.04761904762 | 0.04761904762 | 0.05555555556 | 0.05555555556 | 0.7          | 0.8571428571 |
| EBPA-D0 | 0.04761904762 | 0.04761904762 | 0.05555555556 | 0.05555555556 | 0.7          | 0.8571428571 |
| CEBPB   | 0.09523809524 | 0.09523809524 | 0.16666666667 | 0.16666666667 | 0.4210526316 | 0.5714285714 |
| EBPB-AS | 0.09523809524 | 0.09523809524 | 0.16666666667 | 0.16666666667 | 0.4210526316 | 0.5714285714 |
| CEBPD   | 0.09523809524 | 0.09523809524 | 0.16666666667 | 0.16666666667 | 0.4210526316 | 0.5714285714 |
| CEBPE   | 0             | 0             | 0.05555555556 | 0.05555555556 | 0            | 0            |
| CEBPG   | 0.04761904762 | 0.04761904762 | 0.05555555556 | 0.05555555556 | 0.7          | 0.8571428571 |
| CEBPZ   | 0             | 0             | 0.05555555556 | 0.05555555556 | 0            | 0            |
| EBPZO   | 0             | 0             | 0.05555555556 | 0.05555555556 | 0            | 0            |
| CECR2   | 0.04761904762 | 0.04761904762 | 0             | 0             | inf          | 4.7619E+31   |
| CECR3   | 0.04761904762 | 0.04761904762 | 0             | 0             | inf          | 4.7619E+31   |
| CECR7   | 0.04761904762 | 0.04761904762 | 0             | 0             | inf          | 4.7619E+31   |
| CEL     | 0.04761904762 | 0.04761904762 | 0             | 0             | inf          | 4.7619E+31   |
| CELA1   | 0.09523809524 | 0.09523809524 | 0.05555555556 | 0.05555555556 | 1.473684211  | 1.714285714  |
| CELA2A  | 0.04761904762 | 0.04761904762 | 0.11111111111 | 0.11111111111 | 0.325        | 0.4285714286 |
| CELA2B  | 0.04761904762 | 0.04761904762 | 0.11111111111 | 0.11111111111 | 0.325        | 0.4285714286 |
| CELA3A  | 0.04761904762 | 0.04761904762 | 0.11111111111 | 0.11111111111 | 0.325        | 0.4285714286 |
| CELA3B  | 0.04761904762 | 0.04761904762 | 0.11111111111 | 0.11111111111 | 0.325        | 0.4285714286 |
| CELF1   | 0             | 0             | 0.05555555556 | 0.05555555556 | 0            | 0            |
| CELF2   | 0.09523809524 | 0.09523809524 | 0.11111111111 | 0.11111111111 | 0.6842105263 | 0.8571428571 |
| ELF2-AS | 0.09523809524 | 0.09523809524 | 0.11111111111 | 0.11111111111 | 0.6842105263 | 0.8571428571 |
| ELF2-AS | 0.09523809524 | 0.09523809524 | 0.11111111111 | 0.11111111111 | 0.6842105263 | 0.8571428571 |
| ELF2-D0 | 0.09523809524 | 0.09523809524 | 0.11111111111 | 0.11111111111 | 0.6842105263 | 0.8571428571 |
| CELF3   | 0.1428571429  | 0.1428571429  | 0             | 0             | inf          | 1.42857E+32  |
| CELF4   | 0.04761904762 | 0.04761904762 | 0             | 0             | inf          | 4.7619E+31   |
| CELF5   | 0.09523809524 | 0.09523809524 | 0.05555555556 | 0.05555555556 | 1.473684211  | 1.714285714  |
| CELF6   | 0.04761904762 | 0.04761904762 | 0.05555555556 | 0.05555555556 | 0.7          | 0.8571428571 |
| CELP    | 0.04761904762 | 0.04761904762 | 0             | 0             | inf          | 4.7619E+31   |
| CELSR1  | 0             | 0             | 0.11111111111 | 0.11111111111 | 0            | 0            |

|        |               |               |               |               |              |              |
|--------|---------------|---------------|---------------|---------------|--------------|--------------|
| CELSR2 | 0.04761904762 | 0.04761904762 | 0.05555555556 | 0.05555555556 | 0.7          | 0.8571428571 |
| CELSR3 | 0.09523809524 | 0.09523809524 | 0             | 0             | inf          | 9.52381E+31  |
| CEMIP  | 0.04761904762 | 0.04761904762 | 0.05555555556 | 0.05555555556 | 0.7          | 0.8571428571 |
| CEMIP2 | 0             | 0             | 0.05555555556 | 0.05555555556 | 0            | 0            |
| CEMPI  | 0.04761904762 | 0.04761904762 | 0.11111111111 | 0.11111111111 | 0.325        | 0.4285714286 |
| CEND1  | 0.04761904762 | 0.04761904762 | 0             | 0             | inf          | 4.7619E+31   |
| CENPB  | 0.1904761905  | 0.1904761905  | 0.05555555556 | 0.05555555556 | 3.294117647  | 3.428571429  |
| ENPBD  | 0.09523809524 | 0.09523809524 | 0             | 0             | inf          | 9.52381E+31  |
| ENPBD1 | 0.1428571429  | 0.1428571429  | 0.05555555556 | 0.05555555556 | 2.333333333  | 2.571428571  |
| CENPC  | 0.04761904762 | 0.04761904762 | 0.05555555556 | 0.05555555556 | 0.7          | 0.8571428571 |
| CENPE  | 0             | 0             | 0.05555555556 | 0.05555555556 | 0            | 0            |
| CENPF  | 0.1428571429  | 0.1428571429  | 0             | 0             | inf          | 1.42857E+32  |
| CENPH  | 0.04761904762 | 0.04761904762 | 0.05555555556 | 0.05555555556 | 0.7          | 0.8571428571 |
| CENPK  | 0.04761904762 | 0.04761904762 | 0             | 0             | inf          | 4.7619E+31   |
| CENPL  | 0.1428571429  | 0.1428571429  | 0             | 0             | inf          | 1.42857E+32  |
| CENPM  | 0             | 0             | 0.11111111111 | 0.11111111111 | 0            | 0            |
| CENPN  | 0.09523809524 | 0.09523809524 | 0             | 0             | inf          | 9.52381E+31  |
| CENPP  | 0.04761904762 | 0.04761904762 | 0.05555555556 | 0.05555555556 | 0.7          | 0.8571428571 |
| CENPS  | 0.04761904762 | 0.04761904762 | 0.11111111111 | 0.11111111111 | 0.325        | 0.4285714286 |
| NPS-CO | 0.04761904762 | 0.04761904762 | 0.11111111111 | 0.11111111111 | 0.325        | 0.4285714286 |
| CENPT  | 0.1428571429  | 0.1428571429  | 0.05555555556 | 0.05555555556 | 2.333333333  | 2.571428571  |
| CENPU  | 0             | 0             | 0.05555555556 | 0.05555555556 | 0            | 0            |
| CENPX  | 0.04761904762 | 0.04761904762 | 0             | 0             | inf          | 4.7619E+31   |
| CEP104 | 0             | 0             | 0.05555555556 | 0.05555555556 | 0            | 0            |
| CEP112 | 0.04761904762 | 0.04761904762 | 0             | 0             | inf          | 4.7619E+31   |
| CEP120 | 0.04761904762 | 0.04761904762 | 0             | 0             | inf          | 4.7619E+31   |
| CEP131 | 0.04761904762 | 0.04761904762 | 0             | 0             | inf          | 4.7619E+31   |
| CEP135 | 0.1904761905  | 0.1904761905  | 0.05555555556 | 0.05555555556 | 3.294117647  | 3.428571429  |
| CEP152 | 0.04761904762 | 0.04761904762 | 0.05555555556 | 0.05555555556 | 0.7          | 0.8571428571 |
| CEP170 | 0.1428571429  | 0.1428571429  | 0.05555555556 | 0.05555555556 | 2.333333333  | 2.571428571  |
| EP170P | 0             | 0             | 0.05555555556 | 0.05555555556 | 0            | 0            |
| CEP19  | 0.1428571429  | 0.1428571429  | 0.05555555556 | 0.05555555556 | 2.333333333  | 2.571428571  |
| CEP192 | 0.09523809524 | 0.09523809524 | 0.05555555556 | 0.05555555556 | 1.473684211  | 1.714285714  |
| CEP250 | 0.09523809524 | 0.09523809524 | 0.11111111111 | 0.11111111111 | 0.6842105263 | 0.8571428571 |
| CEP290 | 0.04761904762 | 0.04761904762 | 0.05555555556 | 0.05555555556 | 0.7          | 0.8571428571 |
| EP295N | 0.04761904762 | 0.04761904762 | 0             | 0             | inf          | 4.7619E+31   |
| CEP350 | 0.1428571429  | 0.1428571429  | 0             | 0             | inf          | 1.42857E+32  |
| CEP41  | 0.04761904762 | 0.04761904762 | 0.05555555556 | 0.05555555556 | 0.7          | 0.8571428571 |
| CEP44  | 0             | 0             | 0.05555555556 | 0.05555555556 | 0            | 0            |
| CEP55  | 0.1428571429  | 0.1428571429  | 0.11111111111 | 0.11111111111 | 1.083333333  | 1.285714286  |
| EP57L1 | 0             | 0             | 0             | 0             |              | 0.00001      |
| CEP63  | 0.1428571429  | 0.1428571429  | 0.05555555556 | 0.05555555556 | 2.333333333  | 2.571428571  |
| CEP68  | 0             | 0             | 0.05555555556 | 0.05555555556 | 0            | 0            |
| CEP70  | 0.1428571429  | 0.1428571429  | 0.05555555556 | 0.05555555556 | 2.333333333  | 2.571428571  |
| CEP72  | 0             | 0             | 0.05555555556 | 0.05555555556 | 0            | 0            |
| CEP76  | 0.09523809524 | 0.09523809524 | 0.05555555556 | 0.05555555556 | 1.473684211  | 1.714285714  |
| CEP78  | 0             | 0             | 0.05555555556 | 0.05555555556 | 0            | 0            |
| CEP83  | 0.04761904762 | 0.04761904762 | 0.05555555556 | 0.05555555556 | 0.7          | 0.8571428571 |
| EP83-D | 0.04761904762 | 0.04761904762 | 0.05555555556 | 0.05555555556 | 0.7          | 0.8571428571 |
| CEP85  | 0.04761904762 | 0.04761904762 | 0.11111111111 | 0.11111111111 | 0.325        | 0.4285714286 |
| CEP89  | 0.04761904762 | 0.04761904762 | 0.05555555556 | 0.05555555556 | 0.7          | 0.8571428571 |

|         |               |               |               |               |             |              |
|---------|---------------|---------------|---------------|---------------|-------------|--------------|
| CEP95   | 0.04761904762 | 0.04761904762 | 0             | 0             | inf         | 4.7619E+31   |
| CEP97   | 0.09523809524 | 0.09523809524 | 0.05555555556 | 0.05555555556 | 1.473684211 | 1.714285714  |
| CEPT1   | 0.04761904762 | 0.04761904762 | 0             | 0             | inf         | 4.7619E+31   |
| CERI    | 0.1428571429  | 0.1428571429  | 0.05555555556 | 0.05555555556 | 2.333333333 | 2.571428571  |
| CERK    | 0             | 0             | 0.1111111111  | 0.1111111111  | 0           | 0            |
| CERKL   | 0             | 0             | 0.05555555556 | 0.05555555556 | 0           | 0            |
| CERNA1  | 0.04761904762 | 0.04761904762 | 0.05555555556 | 0.05555555556 | 0.7         | 0.8571428571 |
| CERNA2  | 0.1428571429  | 0.1428571429  | 0             | 0             | inf         | 1.42857E+32  |
| CERNA3  | 0.1428571429  | 0.1428571429  | 0.1111111111  | 0.1111111111  | 1.083333333 | 1.285714286  |
| CERS1   | 0.1428571429  | 0.1428571429  | 0.1111111111  | 0.1111111111  | 1.083333333 | 1.285714286  |
| CERS2   | 0.1904761905  | 0.1904761905  | 0.05555555556 | 0.05555555556 | 3.294117647 | 3.428571429  |
| CERS3   | 0.04761904762 | 0.04761904762 | 0.05555555556 | 0.05555555556 | 0.7         | 0.8571428571 |
| ERS3-AS | 0.04761904762 | 0.04761904762 | 0.05555555556 | 0.05555555556 | 0.7         | 0.8571428571 |
| CERS4   | 0.1428571429  | 0.1428571429  | 0.05555555556 | 0.05555555556 | 2.333333333 | 2.571428571  |
| CERS5   | 0.09523809524 | 0.09523809524 | 0.05555555556 | 0.05555555556 | 1.473684211 | 1.714285714  |
| CERS6   | 0.04761904762 | 0.04761904762 | 0.05555555556 | 0.05555555556 | 0.7         | 0.8571428571 |
| ERS6-AS | 0.04761904762 | 0.04761904762 | 0.05555555556 | 0.05555555556 | 0.7         | 0.8571428571 |
| CES1    | 0.04761904762 | 0.04761904762 | 0             | 0             | inf         | 4.7619E+31   |
| CES1P1  | 0.04761904762 | 0.04761904762 | 0             | 0             | inf         | 4.7619E+31   |
| CES1P2  | 0.04761904762 | 0.04761904762 | 0             | 0             | inf         | 4.7619E+31   |
| CES2    | 0.09523809524 | 0.09523809524 | 0.05555555556 | 0.05555555556 | 1.473684211 | 1.714285714  |
| CES3    | 0.1428571429  | 0.1428571429  | 0.05555555556 | 0.05555555556 | 2.333333333 | 2.571428571  |
| CES4A   | 0.1428571429  | 0.1428571429  | 0.05555555556 | 0.05555555556 | 2.333333333 | 2.571428571  |
| CES5A   | 0.04761904762 | 0.04761904762 | 0             | 0             | inf         | 4.7619E+31   |
| ESSAP   | 0             | 0             | 0.05555555556 | 0.05555555556 | 0           | 0            |
| CETN1   | 0.09523809524 | 0.09523809524 | 0             | 0             | inf         | 9.52381E+31  |
| CETN3   | 0.04761904762 | 0.04761904762 | 0             | 0             | inf         | 4.7619E+31   |
| CETN4P  | 0             | 0             | 0.05555555556 | 0.05555555556 | 0           | 0            |
| CETP    | 0.04761904762 | 0.04761904762 | 0             | 0             | inf         | 4.7619E+31   |
| CFAP10  | 0.04761904762 | 0.04761904762 | 0.05555555556 | 0.05555555556 | 0.7         | 0.8571428571 |
| CFAP12  | 0.1428571429  | 0.1428571429  | 0             | 0             | inf         | 1.42857E+32  |
| CFAP15  | 0.09523809524 | 0.09523809524 | 0.05555555556 | 0.05555555556 | 1.473684211 | 1.714285714  |
| CFAP16  | 0.04761904762 | 0.04761904762 | 0.05555555556 | 0.05555555556 | 0.7         | 0.8571428571 |
| CFAP20  | 0.04761904762 | 0.04761904762 | 0             | 0             | inf         | 4.7619E+31   |
| CFAP22  | 0             | 0             | 0.05555555556 | 0.05555555556 | 0           | 0            |
| CFAP29  | 0.04761904762 | 0.04761904762 | 0.1111111111  | 0.1111111111  | 0.325       | 0.4285714286 |
| CFAP29  | 0.04761904762 | 0.04761904762 | 0.05555555556 | 0.05555555556 | 0.7         | 0.8571428571 |
| CFAP36  | 0.04761904762 | 0.04761904762 | 0.05555555556 | 0.05555555556 | 0.7         | 0.8571428571 |
| CFAP41  | 0.04761904762 | 0.04761904762 | 0.1111111111  | 0.1111111111  | 0.325       | 0.4285714286 |
| CFAP43  | 0.1428571429  | 0.1428571429  | 0.05555555556 | 0.05555555556 | 2.333333333 | 2.571428571  |
| CFAP44  | 0.09523809524 | 0.09523809524 | 0.05555555556 | 0.05555555556 | 1.473684211 | 1.714285714  |
| FAP44-A | 0.09523809524 | 0.09523809524 | 0.05555555556 | 0.05555555556 | 1.473684211 | 1.714285714  |
| CFAP46  | 0.2380952381  | 0.2380952381  | 0             | 0             | inf         | 2.38095E+32  |
| CFAP52  | 0.04761904762 | 0.04761904762 | 0.05555555556 | 0.05555555556 | 0.7         | 0.8571428571 |
| CFAP53  | 0.04761904762 | 0.04761904762 | 0             | 0             | inf         | 4.7619E+31   |
| CFAP54  | 0.04761904762 | 0.04761904762 | 0.05555555556 | 0.05555555556 | 0.7         | 0.8571428571 |
| CFAP57  | 0.04761904762 | 0.04761904762 | 0.05555555556 | 0.05555555556 | 0.7         | 0.8571428571 |
| CFAP58  | 0.1428571429  | 0.1428571429  | 0.05555555556 | 0.05555555556 | 2.333333333 | 2.571428571  |
| FAP58-D | 0.1428571429  | 0.1428571429  | 0.05555555556 | 0.05555555556 | 2.333333333 | 2.571428571  |
| CFAP61  | 0.1904761905  | 0.1904761905  | 0.05555555556 | 0.05555555556 | 3.294117647 | 3.428571429  |
| CFAP65  | 0             | 0             | 0.05555555556 | 0.05555555556 | 0           | 0            |

|        |               |               |              |              |              |              |
|--------|---------------|---------------|--------------|--------------|--------------|--------------|
| CFAP69 | 0.09523809524 | 0.09523809524 | 0.1111111111 | 0.1111111111 | 0.6842105263 | 0.8571428571 |
| CFAP70 | 0.1904761905  | 0.1904761905  | 0.0555555556 | 0.0555555556 | 3.294117647  | 3.428571429  |
| CFAP73 | 0             | 0             | 0.0555555556 | 0.0555555556 | 0            | 0            |
| CFAP74 | 0             | 0             | 0.1111111111 | 0.1111111111 | 0            | 0            |
| CFAP77 | 0.09523809524 | 0.09523809524 | 0            | 0            | inf          | 9.52381E+31  |
| CFAP97 | 0             | 0             | 0.0555555556 | 0.0555555556 | 0            | 0            |
| FAP97D | 0.09523809524 | 0.09523809524 | 0            | 0            | inf          | 9.52381E+31  |
| CFAP99 | 0.04761904762 | 0.04761904762 | 0            | 0            | inf          | 4.7619E+31   |
| CFB    | 0.04761904762 | 0.04761904762 | 0            | 0            | inf          | 4.7619E+31   |
| CFC1   | 0             | 0             | 0.0555555556 | 0.0555555556 | 0            | 0            |
| CFC1B  | 0             | 0             | 0.0555555556 | 0.0555555556 | 0            | 0            |
| CFD    | 0.09523809524 | 0.09523809524 | 0.1111111111 | 0.1111111111 | 0.6842105263 | 0.8571428571 |
| CFDP1  | 0.04761904762 | 0.04761904762 | 0            | 0            | inf          | 4.7619E+31   |
| CFH    | 0.1428571429  | 0.1428571429  | 0            | 0            | inf          | 1.42857E+32  |
| CFHR1  | 0.1428571429  | 0.1428571429  | 0            | 0            | inf          | 1.42857E+32  |
| CFHR2  | 0.1428571429  | 0.1428571429  | 0            | 0            | inf          | 1.42857E+32  |
| CFHR3  | 0.1428571429  | 0.1428571429  | 0            | 0            | inf          | 1.42857E+32  |
| CFHR4  | 0.1428571429  | 0.1428571429  | 0            | 0            | inf          | 1.42857E+32  |
| CFHR5  | 0.1428571429  | 0.1428571429  | 0            | 0            | inf          | 1.42857E+32  |
| CFI    | 0             | 0             | 0.0555555556 | 0.0555555556 | 0            | 0            |
| CFL1P1 | 0.1428571429  | 0.1428571429  | 0.1666666667 | 0.1666666667 | 0.6666666667 | 0.8571428571 |
| CFL2   | 0.09523809524 | 0.09523809524 | 0            | 0            | inf          | 9.52381E+31  |
| CFLAR  | 0             | 0             | 0.0555555556 | 0.0555555556 | 0            | 0            |
| FAR-A  | 0             | 0             | 0.0555555556 | 0.0555555556 | 0            | 0            |
| CFTR   | 0.09523809524 | 0.09523809524 | 0.0555555556 | 0.0555555556 | 1.473684211  | 1.714285714  |
| FTR-AS | 0.09523809524 | 0.09523809524 | 0.0555555556 | 0.0555555556 | 1.473684211  | 1.714285714  |
| CGAS   | 0.04761904762 | 0.04761904762 | 0            | 0            | inf          | 4.7619E+31   |
| CGB1   | 0.09523809524 | 0.09523809524 | 0.1111111111 | 0.1111111111 | 0.6842105263 | 0.8571428571 |
| CGB2   | 0.09523809524 | 0.09523809524 | 0.1111111111 | 0.1111111111 | 0.6842105263 | 0.8571428571 |
| CGB3   | 0.09523809524 | 0.09523809524 | 0.1111111111 | 0.1111111111 | 0.6842105263 | 0.8571428571 |
| CGB5   | 0.09523809524 | 0.09523809524 | 0.1111111111 | 0.1111111111 | 0.6842105263 | 0.8571428571 |
| CGB7   | 0.09523809524 | 0.09523809524 | 0.1111111111 | 0.1111111111 | 0.6842105263 | 0.8571428571 |
| CGB8   | 0.09523809524 | 0.09523809524 | 0.1111111111 | 0.1111111111 | 0.6842105263 | 0.8571428571 |
| CGBP1  | 0.04761904762 | 0.04761904762 | 0            | 0            | inf          | 4.7619E+31   |
| CGN    | 0.1904761905  | 0.1904761905  | 0.0555555556 | 0.0555555556 | 3.294117647  | 3.428571429  |
| CGNL1  | 0.04761904762 | 0.04761904762 | 0.0555555556 | 0.0555555556 | 0.7          | 0.8571428571 |
| CGRRF1 | 0.04761904762 | 0.04761904762 | 0            | 0            | inf          | 4.7619E+31   |
| CH25H  | 0.1428571429  | 0.1428571429  | 0.1666666667 | 0.1666666667 | 0.6666666667 | 0.8571428571 |
| CHAC2  | 0.04761904762 | 0.04761904762 | 0.0555555556 | 0.0555555556 | 0.7          | 0.8571428571 |
| CHAD   | 0.09523809524 | 0.09523809524 | 0            | 0            | inf          | 9.52381E+31  |
| CHADL  | 0             | 0             | 0.1111111111 | 0.1111111111 | 0            | 0            |
| CHAF1B | 0.04761904762 | 0.04761904762 | 0.1666666667 | 0.1666666667 | 0.2          | 0.2857142857 |
| CHAT   | 0.09523809524 | 0.09523809524 | 0.0555555556 | 0.0555555556 | 1.473684211  | 1.714285714  |
| HCHD1  | 0.04761904762 | 0.04761904762 | 0.1111111111 | 0.1111111111 | 0.325        | 0.4285714286 |
| CHCHD2 | 0.2380952381  | 0.2380952381  | 0.1666666667 | 0.1666666667 | 1.25         | 1.428571429  |
| CHCHD3 | 0.04761904762 | 0.04761904762 | 0.0555555556 | 0.0555555556 | 0.7          | 0.8571428571 |
| CHCHD4 | 0.04761904762 | 0.04761904762 | 0            | 0            | inf          | 4.7619E+31   |
| CHCHD5 | 0             | 0             | 0.0555555556 | 0.0555555556 | 0            | 0            |
| CHCHD6 | 0.09523809524 | 0.09523809524 | 0.0555555556 | 0.0555555556 | 1.473684211  | 1.714285714  |
| CHCHD7 | 0.1428571429  | 0.1428571429  | 0.1111111111 | 0.1111111111 | 1.083333333  | 1.285714286  |
| CHD1   | 0.04761904762 | 0.04761904762 | 0            | 0            | inf          | 4.7619E+31   |



|        |               |               |              |              |              |              |
|--------|---------------|---------------|--------------|--------------|--------------|--------------|
| CHD1L  | 0.1428571429  | 0.1428571429  | 0.0555555556 | 0.0555555556 | 2.333333333  | 2.571428571  |
| CHD2   | 0.04761904762 | 0.04761904762 | 0.0555555556 | 0.0555555556 | 0.7          | 0.8571428571 |
| CHD3   | 0             | 0             | 0.0555555556 | 0.0555555556 | 0            | 0            |
| CHD4   | 0.04761904762 | 0.04761904762 | 0.1111111111 | 0.1111111111 | 0.325        | 0.4285714286 |
| CHD5   | 0             | 0             | 0.0555555556 | 0.0555555556 | 0            | 0            |
| CHD6   | 0.1428571429  | 0.1428571429  | 0.1666666667 | 0.1666666667 | 0.6666666667 | 0.8571428571 |
| CHD7   | 0.1428571429  | 0.1428571429  | 0.1666666667 | 0.1666666667 | 0.6666666667 | 0.8571428571 |
| CHD9   | 0.04761904762 | 0.04761904762 | 0.0555555556 | 0.0555555556 | 0.7          | 0.8571428571 |
| CHDH   | 0.04761904762 | 0.04761904762 | 0            | 0            | inf          | 4.7619E+31   |
| CHEK2  | 0.04761904762 | 0.04761904762 | 0.1111111111 | 0.1111111111 | 0.325        | 0.4285714286 |
| HEK2P  | 0.2857142857  | 0.2857142857  | 0.1111111111 | 0.1111111111 | 2.6          | 2.571428571  |
| CHERP  | 0.1428571429  | 0.1428571429  | 0.1111111111 | 0.1111111111 | 1.083333333  | 1.285714286  |
| CHFR   | 0.09523809524 | 0.09523809524 | 0.0555555556 | 0.0555555556 | 1.473684211  | 1.714285714  |
| CHGB   | 0.1904761905  | 0.1904761905  | 0.0555555556 | 0.0555555556 | 3.294117647  | 3.428571429  |
| CHI3L1 | 0.1428571429  | 0.1428571429  | 0            | 0            | inf          | 1.42857E+32  |
| CHI3L2 | 0.04761904762 | 0.04761904762 | 0            | 0            | inf          | 4.7619E+31   |
| CHIA   | 0.04761904762 | 0.04761904762 | 0            | 0            | inf          | 4.7619E+31   |
| CHIAP2 | 0.04761904762 | 0.04761904762 | 0            | 0            | inf          | 4.7619E+31   |
| CHIC2  | 0.2380952381  | 0.2380952381  | 0.0555555556 | 0.0555555556 | 4.375        | 4.285714286  |
| CHID1  | 0.04761904762 | 0.04761904762 | 0            | 0            | inf          | 4.7619E+31   |
| CHIT1  | 0.1428571429  | 0.1428571429  | 0            | 0            | inf          | 1.42857E+32  |
| CHKB   | 0             | 0             | 0.1111111111 | 0.1111111111 | 0            | 0            |
| KB-CPT | 0             | 0             | 0.1111111111 | 0.1111111111 | 0            | 0            |
| HKB-D  | 0             | 0             | 0.1111111111 | 0.1111111111 | 0            | 0            |
| CHL1   | 0.04761904762 | 0.04761904762 | 0.0555555556 | 0.0555555556 | 0.7          | 0.8571428571 |
| HL1-AS | 0.04761904762 | 0.04761904762 | 0.0555555556 | 0.0555555556 | 0.7          | 0.8571428571 |
| HL1-AS | 0.04761904762 | 0.04761904762 | 0.0555555556 | 0.0555555556 | 0.7          | 0.8571428571 |
| CHML   | 0.1428571429  | 0.1428571429  | 0            | 0            | inf          | 1.42857E+32  |
| HMP1A  | 0.09523809524 | 0.09523809524 | 0            | 0            | inf          | 9.52381E+31  |
| HMP1B  | 0.09523809524 | 0.09523809524 | 0.0555555556 | 0.0555555556 | 1.473684211  | 1.714285714  |
| HMP2A  | 0.1428571429  | 0.1428571429  | 0.0555555556 | 0.0555555556 | 2.333333333  | 2.571428571  |
| HMP2B  | 0.04761904762 | 0.04761904762 | 0            | 0            | inf          | 4.7619E+31   |
| CHMP3  | 0             | 0             | 0.0555555556 | 0.0555555556 | 0            | 0            |
| HMP4B  | 0.09523809524 | 0.09523809524 | 0.1111111111 | 0.1111111111 | 0.6842105263 | 0.8571428571 |
| HMP4C  | 0.1428571429  | 0.1428571429  | 0.1111111111 | 0.1111111111 | 1.083333333  | 1.285714286  |
| CHMP5  | 0.09523809524 | 0.09523809524 | 0.0555555556 | 0.0555555556 | 1.473684211  | 1.714285714  |
| CHMP6  | 0.04761904762 | 0.04761904762 | 0            | 0            | inf          | 4.7619E+31   |
| CHMP7  | 0.04761904762 | 0.04761904762 | 0.1111111111 | 0.1111111111 | 0.325        | 0.4285714286 |
| CHN1   | 0             | 0             | 0.1111111111 | 0.1111111111 | 0            | 0            |
| CHN2   | 0.04761904762 | 0.04761904762 | 0.1666666667 | 0.1666666667 | 0.2          | 0.2857142857 |
| CHODL  | 0.04761904762 | 0.04761904762 | 0.0555555556 | 0.0555555556 | 0.7          | 0.8571428571 |
| IODL-A | 0.04761904762 | 0.04761904762 | 0.0555555556 | 0.0555555556 | 0.7          | 0.8571428571 |
| CHP2   | 0.04761904762 | 0.04761904762 | 0            | 0            | inf          | 4.7619E+31   |
| CHPF   | 0             | 0             | 0.0555555556 | 0.0555555556 | 0            | 0            |
| CHPF2  | 0.09523809524 | 0.09523809524 | 0.0555555556 | 0.0555555556 | 1.473684211  | 1.714285714  |
| CHPT1  | 0.04761904762 | 0.04761904762 | 0.0555555556 | 0.0555555556 | 0.7          | 0.8571428571 |
| HRAC   | 0.04761904762 | 0.04761904762 | 0.1666666667 | 0.1666666667 | 0.2          | 0.2857142857 |
| CHRD   | 0.1428571429  | 0.1428571429  | 0.0555555556 | 0.0555555556 | 2.333333333  | 2.571428571  |
| CHRM2  | 0.04761904762 | 0.04761904762 | 0.0555555556 | 0.0555555556 | 0.7          | 0.8571428571 |
| CHRM3  | 0.1428571429  | 0.1428571429  | 0            | 0            | inf          | 1.42857E+32  |
| IRM3-A | 0.1428571429  | 0.1428571429  | 0            | 0            | inf          | 1.42857E+32  |

|         |               |               |               |               |               |              |
|---------|---------------|---------------|---------------|---------------|---------------|--------------|
| IRM3-A  | 0.1428571429  | 0.1428571429  | 0             | 0             | inf           | 1.42857E+32  |
| CHRM4   | 0             | 0             | 0.05555555556 | 0.05555555556 | 0             | 0            |
| CHRNA1  | 0             | 0             | 0.11111111111 | 0.11111111111 | 0             | 0            |
| CHRNA10 | 0.04761904762 | 0.04761904762 | 0             | 0             | inf           | 4.7619E+31   |
| CHRNA2  | 0.04761904762 | 0.04761904762 | 0.11111111111 | 0.11111111111 | 0.325         | 0.4285714286 |
| CHRNA3  | 0.04761904762 | 0.04761904762 | 0.05555555556 | 0.05555555556 | 0.7           | 0.8571428571 |
| CHRNA4  | 0.1428571429  | 0.1428571429  | 0.22222222222 | 0.22222222222 | 0.45833333333 | 0.6428571429 |
| CHRNA5  | 0.04761904762 | 0.04761904762 | 0.05555555556 | 0.05555555556 | 0.7           | 0.8571428571 |
| CHRNA6  | 0.09523809524 | 0.09523809524 | 0.16666666667 | 0.16666666667 | 0.4210526316  | 0.5714285714 |
| CHRNA9  | 0.1904761905  | 0.1904761905  | 0.05555555556 | 0.05555555556 | 3.294117647   | 3.428571429  |
| CHRNBI  | 0             | 0             | 0.05555555556 | 0.05555555556 | 0             | 0            |
| CHRNBI2 | 0.1904761905  | 0.1904761905  | 0.11111111111 | 0.11111111111 | 1.529411765   | 1.714285714  |
| CHRNBI3 | 0.09523809524 | 0.09523809524 | 0.16666666667 | 0.16666666667 | 0.4210526316  | 0.5714285714 |
| CHRNBI4 | 0.04761904762 | 0.04761904762 | 0.05555555556 | 0.05555555556 | 0.7           | 0.8571428571 |
| CHRND   | 0             | 0             | 0.05555555556 | 0.05555555556 | 0             | 0            |
| CHRNE   | 0             | 0             | 0.11111111111 | 0.11111111111 | 0             | 0            |
| CHRNG   | 0             | 0             | 0.05555555556 | 0.05555555556 | 0             | 0            |
| CHST10  | 0             | 0             | 0.05555555556 | 0.05555555556 | 0             | 0            |
| CHST11  | 0.04761904762 | 0.04761904762 | 0.05555555556 | 0.05555555556 | 0.7           | 0.8571428571 |
| CHST12  | 0.04761904762 | 0.04761904762 | 0.16666666667 | 0.16666666667 | 0.2           | 0.2857142857 |
| CHST13  | 0.04761904762 | 0.04761904762 | 0.05555555556 | 0.05555555556 | 0.7           | 0.8571428571 |
| CHST15  | 0.2380952381  | 0.2380952381  | 0.05555555556 | 0.05555555556 | 4.375         | 4.285714286  |
| CHST2   | 0.1428571429  | 0.1428571429  | 0.05555555556 | 0.05555555556 | 2.33333333333 | 2.571428571  |
| CHST3   | 0.1428571429  | 0.1428571429  | 0             | 0             | inf           | 1.42857E+32  |
| CHST4   | 0.04761904762 | 0.04761904762 | 0             | 0             | inf           | 4.7619E+31   |
| CHST5   | 0.04761904762 | 0.04761904762 | 0             | 0             | inf           | 4.7619E+31   |
| CHST6   | 0.04761904762 | 0.04761904762 | 0             | 0             | inf           | 4.7619E+31   |
| CHST8   | 0.04761904762 | 0.04761904762 | 0.05555555556 | 0.05555555556 | 0.7           | 0.8571428571 |
| CHST9   | 0.09523809524 | 0.09523809524 | 0.05555555556 | 0.05555555556 | 1.473684211   | 1.714285714  |
| CHSY1   | 0.04761904762 | 0.04761904762 | 0.05555555556 | 0.05555555556 | 0.7           | 0.8571428571 |
| CHSY3   | 0.04761904762 | 0.04761904762 | 0             | 0             | inf           | 4.7619E+31   |
| CHTF18  | 0.04761904762 | 0.04761904762 | 0.22222222222 | 0.22222222222 | 0.1375        | 0.2142857143 |
| CHTF8   | 0.1428571429  | 0.1428571429  | 0.05555555556 | 0.05555555556 | 2.33333333333 | 2.571428571  |
| CHTOP   | 0.1904761905  | 0.1904761905  | 0.05555555556 | 0.05555555556 | 3.294117647   | 3.428571429  |
| CHUK    | 0.1428571429  | 0.1428571429  | 0             | 0             | inf           | 1.42857E+32  |
| CIAO1   | 0             | 0             | 0.11111111111 | 0.11111111111 | 0             | 0            |
| CIAO2A  | 0.04761904762 | 0.04761904762 | 0.05555555556 | 0.05555555556 | 0.7           | 0.8571428571 |
| CIAO2B  | 0.09523809524 | 0.09523809524 | 0.05555555556 | 0.05555555556 | 1.473684211   | 1.714285714  |
| CIAO3   | 0.04761904762 | 0.04761904762 | 0.22222222222 | 0.22222222222 | 0.1375        | 0.2142857143 |
| CIAPINI | 0.04761904762 | 0.04761904762 | 0             | 0             | inf           | 4.7619E+31   |
| CIART   | 0.1904761905  | 0.1904761905  | 0.05555555556 | 0.05555555556 | 3.294117647   | 3.428571429  |
| CIB1    | 0.04761904762 | 0.04761904762 | 0.05555555556 | 0.05555555556 | 0.7           | 0.8571428571 |
| CIB2    | 0.04761904762 | 0.04761904762 | 0.05555555556 | 0.05555555556 | 0.7           | 0.8571428571 |
| CIB3    | 0.1428571429  | 0.1428571429  | 0.11111111111 | 0.11111111111 | 1.08333333333 | 1.285714286  |
| CIC     | 0.04761904762 | 0.04761904762 | 0.05555555556 | 0.05555555556 | 0.7           | 0.8571428571 |
| CIDEA   | 0.09523809524 | 0.09523809524 | 0.05555555556 | 0.05555555556 | 1.473684211   | 1.714285714  |
| CIDEC   | 0.09523809524 | 0.09523809524 | 0             | 0             | inf           | 9.52381E+31  |
| CIDECP  | 0.09523809524 | 0.09523809524 | 0             | 0             | inf           | 9.52381E+31  |
| CIITA   | 0.04761904762 | 0.04761904762 | 0             | 0             | inf           | 4.7619E+31   |
| CILP    | 0.04761904762 | 0.04761904762 | 0.05555555556 | 0.05555555556 | 0.7           | 0.8571428571 |
| CILP2   | 0.1428571429  | 0.1428571429  | 0.11111111111 | 0.11111111111 | 1.08333333333 | 1.285714286  |

|         |               |               |               |               |              |              |
|---------|---------------|---------------|---------------|---------------|--------------|--------------|
| CIP2A   | 0.09523809524 | 0.09523809524 | 0.05555555556 | 0.05555555556 | 1.473684211  | 1.714285714  |
| CIR1    | 0             | 0             | 0.1111111111  | 0.1111111111  | 0            | 0            |
| CIRBP   | 0.09523809524 | 0.09523809524 | 0.1111111111  | 0.1111111111  | 0.6842105263 | 0.8571428571 |
| IRBP-AS | 0.09523809524 | 0.09523809524 | 0.1111111111  | 0.1111111111  | 0.6842105263 | 0.8571428571 |
| CISD1   | 0.09523809524 | 0.09523809524 | 0.05555555556 | 0.05555555556 | 1.473684211  | 1.714285714  |
| CISD2   | 0             | 0             | 0.05555555556 | 0.05555555556 | 0            | 0            |
| CISD3   | 0.04761904762 | 0.04761904762 | 0             | 0             | inf          | 4.7619E+31   |
| CISH    | 0.09523809524 | 0.09523809524 | 0             | 0             | inf          | 9.52381E+31  |
| CISTR   | 0.04761904762 | 0.04761904762 | 0.05555555556 | 0.05555555556 | 0.7          | 0.8571428571 |
| CIT     | 0             | 0             | 0.1111111111  | 0.1111111111  | 0            | 0            |
| CITED4  | 0.04761904762 | 0.04761904762 | 0.05555555556 | 0.05555555556 | 0.7          | 0.8571428571 |
| CIZ1    | 0.09523809524 | 0.09523809524 | 0.05555555556 | 0.05555555556 | 1.473684211  | 1.714285714  |
| CKAP2L  | 0             | 0             | 0.05555555556 | 0.05555555556 | 0            | 0            |
| CKAP4   | 0.04761904762 | 0.04761904762 | 0.05555555556 | 0.05555555556 | 0.7          | 0.8571428571 |
| CKAP5   | 0             | 0             | 0.05555555556 | 0.05555555556 | 0            | 0            |
| CKLF    | 0.04761904762 | 0.04761904762 | 0             | 0             | inf          | 4.7619E+31   |
| LF-CMT1 | 0.04761904762 | 0.04761904762 | 0             | 0             | inf          | 4.7619E+31   |
| CKM     | 0.09523809524 | 0.09523809524 | 0.1111111111  | 0.1111111111  | 0.6842105263 | 0.8571428571 |
| CKMT2   | 0.04761904762 | 0.04761904762 | 0             | 0             | inf          | 4.7619E+31   |
| KMT2-A  | 0.04761904762 | 0.04761904762 | 0             | 0             | inf          | 4.7619E+31   |
| CKS1B   | 0.1904761905  | 0.1904761905  | 0.1111111111  | 0.1111111111  | 1.529411765  | 1.714285714  |
| CKS2    | 0             | 0             | 0.05555555556 | 0.05555555556 | 0            | 0            |
| CLASP1  | 0             | 0             | 0.05555555556 | 0.05555555556 | 0            | 0            |
| CLASP2  | 0.09523809524 | 0.09523809524 | 0             | 0             | inf          | 9.52381E+31  |
| CLASRP  | 0.09523809524 | 0.09523809524 | 0.1111111111  | 0.1111111111  | 0.6842105263 | 0.8571428571 |
| CLC     | 0.04761904762 | 0.04761904762 | 0.05555555556 | 0.05555555556 | 0.7          | 0.8571428571 |
| CLCA1   | 0.04761904762 | 0.04761904762 | 0.05555555556 | 0.05555555556 | 0.7          | 0.8571428571 |
| CLCA2   | 0.04761904762 | 0.04761904762 | 0.05555555556 | 0.05555555556 | 0.7          | 0.8571428571 |
| CLCA3P  | 0.04761904762 | 0.04761904762 | 0.05555555556 | 0.05555555556 | 0.7          | 0.8571428571 |
| CLCA4   | 0.04761904762 | 0.04761904762 | 0.05555555556 | 0.05555555556 | 0.7          | 0.8571428571 |
| LCA4-A  | 0.04761904762 | 0.04761904762 | 0.05555555556 | 0.05555555556 | 0.7          | 0.8571428571 |
| CLCC1   | 0.04761904762 | 0.04761904762 | 0.05555555556 | 0.05555555556 | 0.7          | 0.8571428571 |
| CLCN1   | 0.04761904762 | 0.04761904762 | 0.05555555556 | 0.05555555556 | 0.7          | 0.8571428571 |
| CLCN2   | 0.1428571429  | 0.1428571429  | 0.05555555556 | 0.05555555556 | 2.333333333  | 2.571428571  |
| CLCN3   | 0             | 0             | 0.05555555556 | 0.05555555556 | 0            | 0            |
| CLCN6   | 0.04761904762 | 0.04761904762 | 0.1111111111  | 0.1111111111  | 0.325        | 0.4285714286 |
| CLCN7   | 0.09523809524 | 0.09523809524 | 0.2222222222  | 0.2222222222  | 0.2894736842 | 0.4285714286 |
| LCNK4   | 0.04761904762 | 0.04761904762 | 0.1111111111  | 0.1111111111  | 0.325        | 0.4285714286 |
| LCNK6   | 0.04761904762 | 0.04761904762 | 0.1111111111  | 0.1111111111  | 0.325        | 0.4285714286 |
| CLDN1   | 0.09523809524 | 0.09523809524 | 0.1111111111  | 0.1111111111  | 0.6842105263 | 0.8571428571 |
| CLDN11  | 0.1904761905  | 0.1904761905  | 0.05555555556 | 0.05555555556 | 3.294117647  | 3.428571429  |
| CLDN12  | 0.09523809524 | 0.09523809524 | 0.1111111111  | 0.1111111111  | 0.6842105263 | 0.8571428571 |
| CLDN14  | 0.04761904762 | 0.04761904762 | 0.1666666667  | 0.1666666667  | 0.2          | 0.2857142857 |
| CLDN15  | 0.04761904762 | 0.04761904762 | 0.05555555556 | 0.05555555556 | 0.7          | 0.8571428571 |
| CLDN16  | 0.09523809524 | 0.09523809524 | 0.1111111111  | 0.1111111111  | 0.6842105263 | 0.8571428571 |
| CLDN17  | 0.04761904762 | 0.04761904762 | 0.05555555556 | 0.05555555556 | 0.7          | 0.8571428571 |
| CLDN18  | 0.1428571429  | 0.1428571429  | 0.05555555556 | 0.05555555556 | 2.333333333  | 2.571428571  |
| CLDN19  | 0.04761904762 | 0.04761904762 | 0.05555555556 | 0.05555555556 | 0.7          | 0.8571428571 |
| CLDN22  | 0             | 0             | 0.05555555556 | 0.05555555556 | 0            | 0            |
| CLDN23  | 0.09523809524 | 0.09523809524 | 0.1111111111  | 0.1111111111  | 0.6842105263 | 0.8571428571 |
| CLDN24  | 0             | 0             | 0.05555555556 | 0.05555555556 | 0            | 0            |

|          |               |               |              |              |             |              |
|----------|---------------|---------------|--------------|--------------|-------------|--------------|
| CLDN3    | 0.1428571429  | 0.1428571429  | 0.1111111111 | 0.1111111111 | 1.083333333 | 1.285714286  |
| CLDN4    | 0.1428571429  | 0.1428571429  | 0.1111111111 | 0.1111111111 | 1.083333333 | 1.285714286  |
| CLDN5    | 0.04761904762 | 0.04761904762 | 0.0555555556 | 0.0555555556 | 0.7         | 0.8571428571 |
| CLDN6    | 0.04761904762 | 0.04761904762 | 0.1111111111 | 0.1111111111 | 0.325       | 0.4285714286 |
| CLDN7    | 0             | 0             | 0.0555555556 | 0.0555555556 | 0           | 0            |
| CLDN8    | 0.04761904762 | 0.04761904762 | 0.0555555556 | 0.0555555556 | 0.7         | 0.8571428571 |
| CLDN9    | 0.04761904762 | 0.04761904762 | 0.1111111111 | 0.1111111111 | 0.325       | 0.4285714286 |
| CLDND1   | 0.04761904762 | 0.04761904762 | 0.0555555556 | 0.0555555556 | 0.7         | 0.8571428571 |
| CLC10A   | 0             | 0             | 0.0555555556 | 0.0555555556 | 0           | 0            |
| CLC11A   | 0.09523809524 | 0.09523809524 | 0.0555555556 | 0.0555555556 | 1.473684211 | 1.714285714  |
| CLC12A   | 0.04761904762 | 0.04761904762 | 0.1111111111 | 0.1111111111 | 0.325       | 0.4285714286 |
| CLC12A-2 | 0.04761904762 | 0.04761904762 | 0.1111111111 | 0.1111111111 | 0.325       | 0.4285714286 |
| CLC12B   | 0.04761904762 | 0.04761904762 | 0.1111111111 | 0.1111111111 | 0.325       | 0.4285714286 |
| CLC16A   | 0.04761904762 | 0.04761904762 | 0            | 0            | inf         | 4.7619E+31   |
| CLC17A   | 0.1428571429  | 0.1428571429  | 0.1111111111 | 0.1111111111 | 1.083333333 | 1.285714286  |
| CLC18A   | 0.1428571429  | 0.1428571429  | 0.0555555556 | 0.0555555556 | 2.333333333 | 2.571428571  |
| CLC18C   | 0.1428571429  | 0.1428571429  | 0.0555555556 | 0.0555555556 | 2.333333333 | 2.571428571  |
| CLC19A   | 0.04761904762 | 0.04761904762 | 0            | 0            | inf         | 4.7619E+31   |
| CLEC1A   | 0.04761904762 | 0.04761904762 | 0.1111111111 | 0.1111111111 | 0.325       | 0.4285714286 |
| CLEC1B   | 0.04761904762 | 0.04761904762 | 0.1111111111 | 0.1111111111 | 0.325       | 0.4285714286 |
| CLEC2A   | 0.04761904762 | 0.04761904762 | 0.1111111111 | 0.1111111111 | 0.325       | 0.4285714286 |
| CLEC2B   | 0.04761904762 | 0.04761904762 | 0.1111111111 | 0.1111111111 | 0.325       | 0.4285714286 |
| CLEC2D   | 0.04761904762 | 0.04761904762 | 0.1111111111 | 0.1111111111 | 0.325       | 0.4285714286 |
| CLEC2I   | 0.04761904762 | 0.04761904762 | 0.0555555556 | 0.0555555556 | 0.7         | 0.8571428571 |
| CLEC3A   | 0.09523809524 | 0.09523809524 | 0            | 0            | inf         | 9.52381E+31  |
| CLEC4A   | 0.04761904762 | 0.04761904762 | 0.1111111111 | 0.1111111111 | 0.325       | 0.4285714286 |
| CLEC4C   | 0.04761904762 | 0.04761904762 | 0.1111111111 | 0.1111111111 | 0.325       | 0.4285714286 |
| CLEC4D   | 0.04761904762 | 0.04761904762 | 0.1111111111 | 0.1111111111 | 0.325       | 0.4285714286 |
| CLEC4E   | 0.04761904762 | 0.04761904762 | 0.1111111111 | 0.1111111111 | 0.325       | 0.4285714286 |
| CLEC4G   | 0.1428571429  | 0.1428571429  | 0.0555555556 | 0.0555555556 | 2.333333333 | 2.571428571  |
| CLEC4G1  | 0.1428571429  | 0.1428571429  | 0.0555555556 | 0.0555555556 | 2.333333333 | 2.571428571  |
| CLEC4M   | 0.1428571429  | 0.1428571429  | 0.0555555556 | 0.0555555556 | 2.333333333 | 2.571428571  |
| CLEC5A   | 0.04761904762 | 0.04761904762 | 0.0555555556 | 0.0555555556 | 0.7         | 0.8571428571 |
| CLEC6A   | 0.04761904762 | 0.04761904762 | 0.1111111111 | 0.1111111111 | 0.325       | 0.4285714286 |
| CLEC7A   | 0.04761904762 | 0.04761904762 | 0.1111111111 | 0.1111111111 | 0.325       | 0.4285714286 |
| CLEC9A   | 0.04761904762 | 0.04761904762 | 0.1111111111 | 0.1111111111 | 0.325       | 0.4285714286 |
| CLECL1   | 0.04761904762 | 0.04761904762 | 0.1111111111 | 0.1111111111 | 0.325       | 0.4285714286 |
| CLGN     | 0             | 0             | 0.0555555556 | 0.0555555556 | 0           | 0            |
| CLHC1    | 0.04761904762 | 0.04761904762 | 0.0555555556 | 0.0555555556 | 0.7         | 0.8571428571 |
| CLIC1    | 0.04761904762 | 0.04761904762 | 0            | 0            | inf         | 4.7619E+31   |
| CLIC3    | 0.1428571429  | 0.1428571429  | 0.0555555556 | 0.0555555556 | 2.333333333 | 2.571428571  |
| CLIC4    | 0.04761904762 | 0.04761904762 | 0.1111111111 | 0.1111111111 | 0.325       | 0.4285714286 |
| CLIC5    | 0.04761904762 | 0.04761904762 | 0.1111111111 | 0.1111111111 | 0.325       | 0.4285714286 |
| CLIC6    | 0.04761904762 | 0.04761904762 | 0.1666666667 | 0.1666666667 | 0.2         | 0.2857142857 |
| CLINT1   | 0.04761904762 | 0.04761904762 | 0.0555555556 | 0.0555555556 | 0.7         | 0.8571428571 |
| CLIP1    | 0.04761904762 | 0.04761904762 | 0.1111111111 | 0.1111111111 | 0.325       | 0.4285714286 |
| CLIP1-AS | 0.04761904762 | 0.04761904762 | 0.1111111111 | 0.1111111111 | 0.325       | 0.4285714286 |
| CLIP2    | 0.1428571429  | 0.1428571429  | 0.1111111111 | 0.1111111111 | 1.083333333 | 1.285714286  |
| CLIP3    | 0.04761904762 | 0.04761904762 | 0.0555555556 | 0.0555555556 | 0.7         | 0.8571428571 |
| CLIP4    | 0             | 0             | 0.0555555556 | 0.0555555556 | 0           | 0            |
| CLK1     | 0             | 0             | 0.0555555556 | 0.0555555556 | 0           | 0            |

|        |               |               |              |              |              |              |
|--------|---------------|---------------|--------------|--------------|--------------|--------------|
| CLK2   | 0.1904761905  | 0.1904761905  | 0.1111111111 | 0.1111111111 | 1.529411765  | 1.714285714  |
| CLK2P1 | 0.04761904762 | 0.04761904762 | 0.1666666667 | 0.1666666667 | 0.2          | 0.2857142857 |
| CLK3   | 0.04761904762 | 0.04761904762 | 0.0555555556 | 0.0555555556 | 0.7          | 0.8571428571 |
| CLK4   | 0.09523809524 | 0.09523809524 | 0.0555555556 | 0.0555555556 | 1.473684211  | 1.714285714  |
| CLUU1  | 0.04761904762 | 0.04761904762 | 0.0555555556 | 0.0555555556 | 0.7          | 0.8571428571 |
| LLU1O  | 0.04761904762 | 0.04761904762 | 0.0555555556 | 0.0555555556 | 0.7          | 0.8571428571 |
| CLN3   | 0.04761904762 | 0.04761904762 | 0            | 0            | inf          | 4.7619E+31   |
| CLN5   | 0             | 0             | 0.0555555556 | 0.0555555556 | 0            | 0            |
| CLN6   | 0.04761904762 | 0.04761904762 | 0.0555555556 | 0.0555555556 | 0.7          | 0.8571428571 |
| CLN8   | 0.1428571429  | 0.1428571429  | 0.1111111111 | 0.1111111111 | 1.083333333  | 1.285714286  |
| CLNK   | 0             | 0             | 0            | 0            |              | 0.00001      |
| CLOCK  | 0.1904761905  | 0.1904761905  | 0.0555555556 | 0.0555555556 | 3.294117647  | 3.428571429  |
| CLPP   | 0.1428571429  | 0.1428571429  | 0.0555555556 | 0.0555555556 | 2.333333333  | 2.571428571  |
| CLPS   | 0.04761904762 | 0.04761904762 | 0.0555555556 | 0.0555555556 | 0.7          | 0.8571428571 |
| CLPSL1 | 0.04761904762 | 0.04761904762 | 0.0555555556 | 0.0555555556 | 0.7          | 0.8571428571 |
| CLPSL2 | 0.04761904762 | 0.04761904762 | 0.0555555556 | 0.0555555556 | 0.7          | 0.8571428571 |
| CLPTM1 | 0.09523809524 | 0.09523809524 | 0.1111111111 | 0.1111111111 | 0.6842105263 | 0.8571428571 |
| LPTM1  | 0             | 0             | 0.1111111111 | 0.1111111111 | 0            | 0            |
| CLPX   | 0.04761904762 | 0.04761904762 | 0.0555555556 | 0.0555555556 | 0.7          | 0.8571428571 |
| CLRN1  | 0.1904761905  | 0.1904761905  | 0.1111111111 | 0.1111111111 | 1.529411765  | 1.714285714  |
| LRN1-A | 0.1904761905  | 0.1904761905  | 0.1111111111 | 0.1111111111 | 1.529411765  | 1.714285714  |
| CLRN2  | 0             | 0             | 0            | 0            |              | 0.00001      |
| CLRN3  | 0.2380952381  | 0.2380952381  | 0.0555555556 | 0.0555555556 | 4.375        | 4.285714286  |
| CLSPN  | 0.04761904762 | 0.04761904762 | 0.0555555556 | 0.0555555556 | 0.7          | 0.8571428571 |
| CLSTN1 | 0             | 0             | 0.0555555556 | 0.0555555556 | 0            | 0            |
| CLSTN2 | 0.1428571429  | 0.1428571429  | 0.0555555556 | 0.0555555556 | 2.333333333  | 2.571428571  |
| STN2-A | 0.1428571429  | 0.1428571429  | 0.0555555556 | 0.0555555556 | 2.333333333  | 2.571428571  |
| CLSTN3 | 0.04761904762 | 0.04761904762 | 0.1111111111 | 0.1111111111 | 0.325        | 0.4285714286 |
| CLTA   | 0.09523809524 | 0.09523809524 | 0.0555555556 | 0.0555555556 | 1.473684211  | 1.714285714  |
| CLTB   | 0.09523809524 | 0.09523809524 | 0.0555555556 | 0.0555555556 | 1.473684211  | 1.714285714  |
| CLTC   | 0.1428571429  | 0.1428571429  | 0            | 0            | inf          | 1.42857E+32  |
| CLTCL1 | 0.04761904762 | 0.04761904762 | 0.0555555556 | 0.0555555556 | 0.7          | 0.8571428571 |
| CLU    | 0.04761904762 | 0.04761904762 | 0.1111111111 | 0.1111111111 | 0.325        | 0.4285714286 |
| CLUAP1 | 0.04761904762 | 0.04761904762 | 0.1111111111 | 0.1111111111 | 0.325        | 0.4285714286 |
| CLUH   | 0             | 0             | 0.1111111111 | 0.1111111111 | 0            | 0            |
| CLUHP3 | 0.04761904762 | 0.04761904762 | 0            | 0            | inf          | 4.7619E+31   |
| CLUL1  | 0.09523809524 | 0.09523809524 | 0            | 0            | inf          | 9.52381E+31  |
| CLVS1  | 0.1428571429  | 0.1428571429  | 0.1666666667 | 0.1666666667 | 0.6666666667 | 0.8571428571 |
| CMAHP  | 0             | 0             | 0.0555555556 | 0.0555555556 | 0            | 0            |
| CMAS   | 0.04761904762 | 0.04761904762 | 0.0555555556 | 0.0555555556 | 0.7          | 0.8571428571 |
| CMBL   | 0.04761904762 | 0.04761904762 | 0.0555555556 | 0.0555555556 | 0.7          | 0.8571428571 |
| CMC1   | 0.04761904762 | 0.04761904762 | 0            | 0            | inf          | 4.7619E+31   |
| CMC2   | 0.09523809524 | 0.09523809524 | 0            | 0            | inf          | 9.52381E+31  |
| CMIP   | 0.04761904762 | 0.04761904762 | 0            | 0            | inf          | 4.7619E+31   |
| MKLR   | 0.04761904762 | 0.04761904762 | 0.0555555556 | 0.0555555556 | 0.7          | 0.8571428571 |
| CMPK1  | 0.04761904762 | 0.04761904762 | 0.0555555556 | 0.0555555556 | 0.7          | 0.8571428571 |
| CMPK2  | 0             | 0             | 0.0555555556 | 0.0555555556 | 0            | 0            |
| CMSS1  | 0.09523809524 | 0.09523809524 | 0.1111111111 | 0.1111111111 | 0.6842105263 | 0.8571428571 |
| CMTM1  | 0.04761904762 | 0.04761904762 | 0            | 0            | inf          | 4.7619E+31   |
| CMTM2  | 0.04761904762 | 0.04761904762 | 0            | 0            | inf          | 4.7619E+31   |
| CMTM3  | 0.04761904762 | 0.04761904762 | 0            | 0            | inf          | 4.7619E+31   |

|        |               |               |               |               |              |              |
|--------|---------------|---------------|---------------|---------------|--------------|--------------|
| CMTM4  | 0.09523809524 | 0.09523809524 | 0.05555555556 | 0.05555555556 | 1.473684211  | 1.714285714  |
| CMTM5  | 0             | 0             | 0.05555555556 | 0.05555555556 | 0            | 0            |
| CMTM6  | 0.09523809524 | 0.09523809524 | 0             | 0             | inf          | 9.52381E+31  |
| CMTM7  | 0.09523809524 | 0.09523809524 | 0             | 0             | inf          | 9.52381E+31  |
| CMTM8  | 0.09523809524 | 0.09523809524 | 0             | 0             | inf          | 9.52381E+31  |
| CMTR1  | 0.04761904762 | 0.04761904762 | 0.05555555556 | 0.05555555556 | 0.7          | 0.8571428571 |
| CMTR2  | 0.04761904762 | 0.04761904762 | 0             | 0             | inf          | 4.7619E+31   |
| CMYA5  | 0.04761904762 | 0.04761904762 | 0             | 0             | inf          | 4.7619E+31   |
| CNBD1  | 0.1904761905  | 0.1904761905  | 0.16666666667 | 0.16666666667 | 0.9411764706 | 1.142857143  |
| CNBD2  | 0.09523809524 | 0.09523809524 | 0.11111111111 | 0.11111111111 | 0.6842105263 | 0.8571428571 |
| CNBP   | 0.09523809524 | 0.09523809524 | 0.05555555556 | 0.05555555556 | 1.473684211  | 1.714285714  |
| NEP1R  | 0.04761904762 | 0.04761904762 | 0             | 0             | inf          | 4.7619E+31   |
| CNFN   | 0.04761904762 | 0.04761904762 | 0.05555555556 | 0.05555555556 | 0.7          | 0.8571428571 |
| CNGA1  | 0.04761904762 | 0.04761904762 | 0.11111111111 | 0.11111111111 | 0.325        | 0.4285714286 |
| CNGA3  | 0             | 0             | 0.05555555556 | 0.05555555556 | 0            | 0            |
| CNGA4  | 0.04761904762 | 0.04761904762 | 0             | 0             | inf          | 4.7619E+31   |
| CNGB1  | 0.04761904762 | 0.04761904762 | 0             | 0             | inf          | 4.7619E+31   |
| CNGB3  | 0.1904761905  | 0.1904761905  | 0.11111111111 | 0.11111111111 | 1.529411765  | 1.714285714  |
| CNIH1  | 0.04761904762 | 0.04761904762 | 0             | 0             | inf          | 4.7619E+31   |
| CNIH3  | 0.1428571429  | 0.1428571429  | 0.05555555556 | 0.05555555556 | 2.333333333  | 2.571428571  |
| CNIH4  | 0.1428571429  | 0.1428571429  | 0.05555555556 | 0.05555555556 | 2.333333333  | 2.571428571  |
| CNKSRI | 0.04761904762 | 0.04761904762 | 0.11111111111 | 0.11111111111 | 0.325        | 0.4285714286 |
| CNN1   | 0.1428571429  | 0.1428571429  | 0.11111111111 | 0.11111111111 | 1.083333333  | 1.285714286  |
| CNN2   | 0.09523809524 | 0.09523809524 | 0.11111111111 | 0.11111111111 | 0.6842105263 | 0.8571428571 |
| CNN3   | 0.04761904762 | 0.04761904762 | 0.05555555556 | 0.05555555556 | 0.7          | 0.8571428571 |
| CNNM1  | 0.1428571429  | 0.1428571429  | 0             | 0             | inf          | 1.42857E+32  |
| CNNM2  | 0.1428571429  | 0.1428571429  | 0.05555555556 | 0.05555555556 | 2.333333333  | 2.571428571  |
| CNNM3  | 0             | 0             | 0.11111111111 | 0.11111111111 | 0            | 0            |
| NNM3-D | 0             | 0             | 0.11111111111 | 0.11111111111 | 0            | 0            |
| CNNM4  | 0             | 0             | 0.11111111111 | 0.11111111111 | 0            | 0            |
| CNOT1  | 0.04761904762 | 0.04761904762 | 0             | 0             | inf          | 4.7619E+31   |
| CNOT10 | 0.09523809524 | 0.09523809524 | 0             | 0             | inf          | 9.52381E+31  |
| CNOT11 | 0             | 0             | 0.05555555556 | 0.05555555556 | 0            | 0            |
| CNOT2  | 0.09523809524 | 0.09523809524 | 0.11111111111 | 0.11111111111 | 0.6842105263 | 0.8571428571 |
| CNOT3  | 0.09523809524 | 0.09523809524 | 0.05555555556 | 0.05555555556 | 1.473684211  | 1.714285714  |
| CNOT4  | 0.04761904762 | 0.04761904762 | 0.05555555556 | 0.05555555556 | 0.7          | 0.8571428571 |
| CNOT6  | 0.09523809524 | 0.09523809524 | 0.05555555556 | 0.05555555556 | 1.473684211  | 1.714285714  |
| CNOT6L | 0.04761904762 | 0.04761904762 | 0.05555555556 | 0.05555555556 | 0.7          | 0.8571428571 |
| CNOT7  | 0.09523809524 | 0.09523809524 | 0.11111111111 | 0.11111111111 | 0.6842105263 | 0.8571428571 |
| CNOT8  | 0             | 0             | 0.05555555556 | 0.05555555556 | 0            | 0            |
| CNOT9  | 0             | 0             | 0.05555555556 | 0.05555555556 | 0            | 0            |
| CNP    | 0.09523809524 | 0.09523809524 | 0             | 0             | inf          | 9.52381E+31  |
| CNPY1  | 0.1428571429  | 0.1428571429  | 0.05555555556 | 0.05555555556 | 2.333333333  | 2.571428571  |
| CNPY2  | 0.1428571429  | 0.1428571429  | 0.05555555556 | 0.05555555556 | 2.333333333  | 2.571428571  |
| CNPY3  | 0.04761904762 | 0.04761904762 | 0.05555555556 | 0.05555555556 | 0.7          | 0.8571428571 |
| PY3-GN | 0.04761904762 | 0.04761904762 | 0.05555555556 | 0.05555555556 | 0.7          | 0.8571428571 |
| CNPY4  | 0.04761904762 | 0.04761904762 | 0.05555555556 | 0.05555555556 | 0.7          | 0.8571428571 |
| CNR2   | 0.04761904762 | 0.04761904762 | 0.11111111111 | 0.11111111111 | 0.325        | 0.4285714286 |
| CNRIP1 | 0             | 0             | 0.05555555556 | 0.05555555556 | 0            | 0            |
| CNST   | 0.1428571429  | 0.1428571429  | 0.05555555556 | 0.05555555556 | 2.333333333  | 2.571428571  |
| CNTD1  | 0.04761904762 | 0.04761904762 | 0             | 0             | inf          | 4.7619E+31   |

|         |               |               |               |               |              |              |
|---------|---------------|---------------|---------------|---------------|--------------|--------------|
| CNTD2   | 0.04761904762 | 0.04761904762 | 0.05555555556 | 0.05555555556 | 0.7          | 0.8571428571 |
| CNTFR   | 0.09523809524 | 0.09523809524 | 0.05555555556 | 0.05555555556 | 1.473684211  | 1.714285714  |
| NTFR-A  | 0.09523809524 | 0.09523809524 | 0.05555555556 | 0.05555555556 | 1.473684211  | 1.714285714  |
| CNTLN   | 0.04761904762 | 0.04761904762 | 0.05555555556 | 0.05555555556 | 0.7          | 0.8571428571 |
| CNTN1   | 0.04761904762 | 0.04761904762 | 0.05555555556 | 0.05555555556 | 0.7          | 0.8571428571 |
| CNTN2   | 0.2380952381  | 0.2380952381  | 0             | 0             | inf          | 2.38095E+32  |
| CNTN3   | 0.04761904762 | 0.04761904762 | 0             | 0             | inf          | 4.7619E+31   |
| CNTN4   | 0.04761904762 | 0.04761904762 | 0             | 0             | inf          | 4.7619E+31   |
| NTN4-A  | 0.04761904762 | 0.04761904762 | 0             | 0             | inf          | 4.7619E+31   |
| NTN4-A  | 0.04761904762 | 0.04761904762 | 0             | 0             | inf          | 4.7619E+31   |
| CNTN6   | 0.04761904762 | 0.04761904762 | 0             | 0             | inf          | 4.7619E+31   |
| NTNAP   | 0.04761904762 | 0.04761904762 | 0             | 0             | inf          | 4.7619E+31   |
| NTNAP   | 0.09523809524 | 0.09523809524 | 0.05555555556 | 0.05555555556 | 1.473684211  | 1.714285714  |
| NTNAP   | 0.04761904762 | 0.04761904762 | 0.11111111111 | 0.11111111111 | 0.325        | 0.4285714286 |
| NTNAP3  | 0.1428571429  | 0.1428571429  | 0.05555555556 | 0.05555555556 | 2.333333333  | 2.571428571  |
| NTNAP3  | 0.1428571429  | 0.1428571429  | 0.05555555556 | 0.05555555556 | 2.333333333  | 2.571428571  |
| NTNAP   | 0.04761904762 | 0.04761904762 | 0             | 0             | inf          | 4.7619E+31   |
| NTNAP   | 0             | 0             | 0.05555555556 | 0.05555555556 | 0            | 0            |
| CNTRL   | 0.09523809524 | 0.09523809524 | 0.05555555556 | 0.05555555556 | 1.473684211  | 1.714285714  |
| CNTROI  | 0             | 0             | 0.05555555556 | 0.05555555556 | 0            | 0            |
| COA1    | 0.04761904762 | 0.04761904762 | 0.16666666667 | 0.16666666667 | 0.2          | 0.2857142857 |
| COA3    | 0.04761904762 | 0.04761904762 | 0             | 0             | inf          | 4.7619E+31   |
| COA5    | 0             | 0             | 0.05555555556 | 0.05555555556 | 0            | 0            |
| COA6    | 0.09523809524 | 0.09523809524 | 0             | 0             | inf          | 9.52381E+31  |
| OA6-AS  | 0.09523809524 | 0.09523809524 | 0             | 0             | inf          | 9.52381E+31  |
| COA7    | 0.04761904762 | 0.04761904762 | 0.05555555556 | 0.05555555556 | 0.7          | 0.8571428571 |
| COBL    | 0.1428571429  | 0.1428571429  | 0.16666666667 | 0.16666666667 | 0.6666666667 | 0.8571428571 |
| COBLL1  | 0             | 0             | 0.05555555556 | 0.05555555556 | 0            | 0            |
| COCH    | 0             | 0             | 0             | 0             |              | 0.00001      |
| COG1    | 0.04761904762 | 0.04761904762 | 0             | 0             | inf          | 4.7619E+31   |
| COG2    | 0.1428571429  | 0.1428571429  | 0             | 0             | inf          | 1.42857E+32  |
| COG4    | 0.1428571429  | 0.1428571429  | 0.05555555556 | 0.05555555556 | 2.333333333  | 2.571428571  |
| COG5    | 0.04761904762 | 0.04761904762 | 0.05555555556 | 0.05555555556 | 0.7          | 0.8571428571 |
| COG7    | 0.04761904762 | 0.04761904762 | 0             | 0             | inf          | 4.7619E+31   |
| COG8    | 0.1428571429  | 0.1428571429  | 0.05555555556 | 0.05555555556 | 2.333333333  | 2.571428571  |
| COIL    | 0.09523809524 | 0.09523809524 | 0             | 0             | inf          | 9.52381E+31  |
| COL11A  | 0.04761904762 | 0.04761904762 | 0.05555555556 | 0.05555555556 | 0.7          | 0.8571428571 |
| COL11A  | 0.04761904762 | 0.04761904762 | 0             | 0             | inf          | 4.7619E+31   |
| COL13A  | 0.09523809524 | 0.09523809524 | 0             | 0             | inf          | 9.52381E+31  |
| COL14A  | 0.09523809524 | 0.09523809524 | 0.16666666667 | 0.16666666667 | 0.4210526316 | 0.5714285714 |
| COL15A  | 0.04761904762 | 0.04761904762 | 0             | 0             | inf          | 4.7619E+31   |
| COL16A  | 0.04761904762 | 0.04761904762 | 0.11111111111 | 0.11111111111 | 0.325        | 0.4285714286 |
| COL17A  | 0.1428571429  | 0.1428571429  | 0.11111111111 | 0.11111111111 | 1.083333333  | 1.285714286  |
| COL18A  | 0.04761904762 | 0.04761904762 | 0.11111111111 | 0.11111111111 | 0.325        | 0.4285714286 |
| L18A1-A | 0.04761904762 | 0.04761904762 | 0.11111111111 | 0.11111111111 | 0.325        | 0.4285714286 |
| L18A1-A | 0.04761904762 | 0.04761904762 | 0.11111111111 | 0.11111111111 | 0.325        | 0.4285714286 |
| COL1A1  | 0.09523809524 | 0.09523809524 | 0             | 0             | inf          | 9.52381E+31  |
| COL1A2  | 0.04761904762 | 0.04761904762 | 0.11111111111 | 0.11111111111 | 0.325        | 0.4285714286 |
| OL1A2-A | 0.04761904762 | 0.04761904762 | 0.11111111111 | 0.11111111111 | 0.325        | 0.4285714286 |
| COL20A  | 0.1428571429  | 0.1428571429  | 0.22222222222 | 0.22222222222 | 0.4583333333 | 0.6428571429 |
| COL21A  | 0.04761904762 | 0.04761904762 | 0.05555555556 | 0.05555555556 | 0.7          | 0.8571428571 |

|         |               |               |               |               |              |              |
|---------|---------------|---------------|---------------|---------------|--------------|--------------|
| COL22A  | 0.04761904762 | 0.04761904762 | 0.1111111111  | 0.1111111111  | 0.325        | 0.4285714286 |
| COL23A  | 0.09523809524 | 0.09523809524 | 0.05555555556 | 0.05555555556 | 1.473684211  | 1.714285714  |
| COL24A  | 0.04761904762 | 0.04761904762 | 0.05555555556 | 0.05555555556 | 0.7          | 0.8571428571 |
| COL25A  | 0             | 0             | 0.05555555556 | 0.05555555556 | 0            | 0            |
| COL26A  | 0.04761904762 | 0.04761904762 | 0.05555555556 | 0.05555555556 | 0.7          | 0.8571428571 |
| COL27A  | 0.04761904762 | 0.04761904762 | 0.05555555556 | 0.05555555556 | 0.7          | 0.8571428571 |
| COL28A  | 0.04761904762 | 0.04761904762 | 0.16666666667 | 0.16666666667 | 0.2          | 0.2857142857 |
| COL2A1  | 0.04761904762 | 0.04761904762 | 0.05555555556 | 0.05555555556 | 0.7          | 0.8571428571 |
| COL3A1  | 0             | 0             | 0.16666666667 | 0.16666666667 | 0            | 0            |
| COL4A3  | 0             | 0             | 0.05555555556 | 0.05555555556 | 0            | 0            |
| OL4A3B  | 0.04761904762 | 0.04761904762 | 0             | 0             | inf          | 4.7619E+31   |
| COL4A4  | 0             | 0             | 0.05555555556 | 0.05555555556 | 0            | 0            |
| COL5A1  | 0.04761904762 | 0.04761904762 | 0             | 0             | inf          | 4.7619E+31   |
| OL5A1-A | 0.04761904762 | 0.04761904762 | 0             | 0             | inf          | 4.7619E+31   |
| COL5A2  | 0             | 0             | 0.16666666667 | 0.16666666667 | 0            | 0            |
| COL5A3  | 0.1428571429  | 0.1428571429  | 0.1111111111  | 0.1111111111  | 1.083333333  | 1.285714286  |
| COL6A1  | 0.04761904762 | 0.04761904762 | 0.1111111111  | 0.1111111111  | 0.325        | 0.4285714286 |
| COL6A2  | 0.04761904762 | 0.04761904762 | 0.1111111111  | 0.1111111111  | 0.325        | 0.4285714286 |
| COL6A3  | 0             | 0             | 0.05555555556 | 0.05555555556 | 0            | 0            |
| OL6A4F  | 0.04761904762 | 0.04761904762 | 0             | 0             | inf          | 4.7619E+31   |
| OL6A4F  | 0.09523809524 | 0.09523809524 | 0.05555555556 | 0.05555555556 | 1.473684211  | 1.714285714  |
| COL6A5  | 0.09523809524 | 0.09523809524 | 0.05555555556 | 0.05555555556 | 1.473684211  | 1.714285714  |
| COL6A6  | 0.09523809524 | 0.09523809524 | 0.05555555556 | 0.05555555556 | 1.473684211  | 1.714285714  |
| COL7A1  | 0.09523809524 | 0.09523809524 | 0             | 0             | inf          | 9.52381E+31  |
| COL8A1  | 0.09523809524 | 0.09523809524 | 0.1111111111  | 0.1111111111  | 0.6842105263 | 0.8571428571 |
| COL8A2  | 0.04761904762 | 0.04761904762 | 0.05555555556 | 0.05555555556 | 0.7          | 0.8571428571 |
| COL9A2  | 0.04761904762 | 0.04761904762 | 0.05555555556 | 0.05555555556 | 0.7          | 0.8571428571 |
| COL9A3  | 0.1428571429  | 0.1428571429  | 0.2222222222  | 0.2222222222  | 0.4583333333 | 0.6428571429 |
| OLEC1   | 0.09523809524 | 0.09523809524 | 0.16666666667 | 0.16666666667 | 0.4210526316 | 0.5714285714 |
| OLEC1   | 0             | 0             | 0.05555555556 | 0.05555555556 | 0            | 0            |
| OLEC1   | 0.09523809524 | 0.09523809524 | 0             | 0             | inf          | 9.52381E+31  |
| OLGAL   | 0.1428571429  | 0.1428571429  | 0             | 0             | inf          | 1.42857E+32  |
| COLQ    | 0.04761904762 | 0.04761904762 | 0             | 0             | inf          | 4.7619E+31   |
| OMMD    | 0.04761904762 | 0.04761904762 | 0.05555555556 | 0.05555555556 | 0.7          | 0.8571428571 |
| OMMD    | 0.04761904762 | 0.04761904762 | 0             | 0             | inf          | 4.7619E+31   |
| OMMD    | 0.1904761905  | 0.1904761905  | 0.1111111111  | 0.1111111111  | 1.529411765  | 1.714285714  |
| OMMD    | 0.09523809524 | 0.09523809524 | 0.1111111111  | 0.1111111111  | 0.6842105263 | 0.8571428571 |
| IMD3-B  | 0.09523809524 | 0.09523809524 | 0.1111111111  | 0.1111111111  | 0.6842105263 | 0.8571428571 |
| OMMD    | 0.04761904762 | 0.04761904762 | 0.05555555556 | 0.05555555556 | 0.7          | 0.8571428571 |
| OMMD    | 0.09523809524 | 0.09523809524 | 0.2222222222  | 0.2222222222  | 0.2894736842 | 0.4285714286 |
| OMMD    | 0             | 0             | 0.05555555556 | 0.05555555556 | 0            | 0            |
| OMMD    | 0.09523809524 | 0.09523809524 | 0.1111111111  | 0.1111111111  | 0.6842105263 | 0.8571428571 |
| OMMD    | 0.04761904762 | 0.04761904762 | 0.05555555556 | 0.05555555556 | 0.7          | 0.8571428571 |
| COMP    | 0.1428571429  | 0.1428571429  | 0.1111111111  | 0.1111111111  | 1.083333333  | 1.285714286  |
| COMT    | 0.04761904762 | 0.04761904762 | 0.05555555556 | 0.05555555556 | 0.7          | 0.8571428571 |
| OMTD    | 0.1904761905  | 0.1904761905  | 0.05555555556 | 0.05555555556 | 3.294117647  | 3.428571429  |
| COP1    | 0.1428571429  | 0.1428571429  | 0             | 0             | inf          | 1.42857E+32  |
| COPA    | 0.1428571429  | 0.1428571429  | 0             | 0             | inf          | 1.42857E+32  |
| COPB2   | 0.1428571429  | 0.1428571429  | 0.05555555556 | 0.05555555556 | 2.333333333  | 2.571428571  |
| COPE    | 0.1428571429  | 0.1428571429  | 0.1111111111  | 0.1111111111  | 1.083333333  | 1.285714286  |
| COPG1   | 0.09523809524 | 0.09523809524 | 0.05555555556 | 0.05555555556 | 1.473684211  | 1.714285714  |



|                |               |               |               |               |              |              |
|----------------|---------------|---------------|---------------|---------------|--------------|--------------|
| <b>COPG2</b>   | 0.04761904762 | 0.04761904762 | 0.05555555556 | 0.05555555556 | 0.7          | 0.8571428571 |
| <b>COPRS</b>   | 0             | 0             | 0             | 0             |              | 0.00001      |
| <b>COPS2</b>   | 0.04761904762 | 0.04761904762 | 0.05555555556 | 0.05555555556 | 0.7          | 0.8571428571 |
| <b>COPS3</b>   | 0.04761904762 | 0.04761904762 | 0.11111111111 | 0.11111111111 | 0.325        | 0.4285714286 |
| <b>COPS4</b>   | 0             | 0             | 0.05555555556 | 0.05555555556 | 0            | 0            |
| <b>COPS5</b>   | 0.1428571429  | 0.1428571429  | 0.16666666667 | 0.16666666667 | 0.6666666667 | 0.8571428571 |
| <b>COPS6</b>   | 0.04761904762 | 0.04761904762 | 0.05555555556 | 0.05555555556 | 0.7          | 0.8571428571 |
| <b>COPS7A</b>  | 0.04761904762 | 0.04761904762 | 0.11111111111 | 0.11111111111 | 0.325        | 0.4285714286 |
| <b>COPS7B</b>  | 0             | 0             | 0.05555555556 | 0.05555555556 | 0            | 0            |
| <b>COPS8</b>   | 0             | 0             | 0.05555555556 | 0.05555555556 | 0            | 0            |
| <b>COPS9</b>   | 0.04761904762 | 0.04761904762 | 0.05555555556 | 0.05555555556 | 0.7          | 0.8571428571 |
| <b>COPZ1</b>   | 0.04761904762 | 0.04761904762 | 0.05555555556 | 0.05555555556 | 0.7          | 0.8571428571 |
| <b>COPZ2</b>   | 0.1428571429  | 0.1428571429  | 0             | 0             | inf          | 1.42857E+32  |
| <b>COQ10A</b>  | 0.1428571429  | 0.1428571429  | 0.05555555556 | 0.05555555556 | 2.333333333  | 2.571428571  |
| <b>COQ10B</b>  | 0             | 0             | 0.05555555556 | 0.05555555556 | 0            | 0            |
| <b>COQ2</b>    | 0             | 0             | 0.05555555556 | 0.05555555556 | 0            | 0            |
| <b>COQ4</b>    | 0.09523809524 | 0.09523809524 | 0.05555555556 | 0.05555555556 | 1.473684211  | 1.714285714  |
| <b>COQ5</b>    | 0             | 0             | 0.11111111111 | 0.11111111111 | 0            | 0            |
| <b>COQ6</b>    | 0.09523809524 | 0.09523809524 | 0             | 0             | inf          | 9.52381E+31  |
| <b>COQ7</b>    | 0.04761904762 | 0.04761904762 | 0             | 0             | inf          | 4.7619E+31   |
| <b>COQ8A</b>   | 0.1428571429  | 0.1428571429  | 0             | 0             | inf          | 1.42857E+32  |
| <b>COQ8B</b>   | 0.04761904762 | 0.04761904762 | 0.05555555556 | 0.05555555556 | 0.7          | 0.8571428571 |
| <b>COQ9</b>    | 0.04761904762 | 0.04761904762 | 0             | 0             | inf          | 4.7619E+31   |
| <b>CORIN</b>   | 0.04761904762 | 0.04761904762 | 0.11111111111 | 0.11111111111 | 0.325        | 0.4285714286 |
| <b>CORO1A</b>  | 0.04761904762 | 0.04761904762 | 0             | 0             | inf          | 4.7619E+31   |
| <b>CORO1C</b>  | 0.04761904762 | 0.04761904762 | 0.05555555556 | 0.05555555556 | 0.7          | 0.8571428571 |
| <b>CORO2A</b>  | 0.04761904762 | 0.04761904762 | 0             | 0             | inf          | 4.7619E+31   |
| <b>CORO2B</b>  | 0.04761904762 | 0.04761904762 | 0.05555555556 | 0.05555555556 | 0.7          | 0.8571428571 |
| <b>CORO6</b>   | 0             | 0             | 0.05555555556 | 0.05555555556 | 0            | 0            |
| <b>CORO7</b>   | 0.04761904762 | 0.04761904762 | 0             | 0             | inf          | 4.7619E+31   |
| <b>RO7-PA1</b> | 0.04761904762 | 0.04761904762 | 0             | 0             | inf          | 4.7619E+31   |
| <b>CORT</b>    | 0.04761904762 | 0.04761904762 | 0.11111111111 | 0.11111111111 | 0.325        | 0.4285714286 |
| <b>COTL1</b>   | 0.04761904762 | 0.04761904762 | 0             | 0             | inf          | 4.7619E+31   |
| <b>COX10</b>   | 0.04761904762 | 0.04761904762 | 0.05555555556 | 0.05555555556 | 0.7          | 0.8571428571 |
| <b>OX10-A5</b> | 0.04761904762 | 0.04761904762 | 0.05555555556 | 0.05555555556 | 0.7          | 0.8571428571 |
| <b>COX11</b>   | 0.04761904762 | 0.04761904762 | 0             | 0             | inf          | 4.7619E+31   |
| <b>COX14</b>   | 0.04761904762 | 0.04761904762 | 0.05555555556 | 0.05555555556 | 0.7          | 0.8571428571 |
| <b>COX15</b>   | 0.1428571429  | 0.1428571429  | 0             | 0             | inf          | 1.42857E+32  |
| <b>COX17</b>   | 0.09523809524 | 0.09523809524 | 0.05555555556 | 0.05555555556 | 1.473684211  | 1.714285714  |
| <b>COX18</b>   | 0.1428571429  | 0.1428571429  | 0.05555555556 | 0.05555555556 | 2.333333333  | 2.571428571  |
| <b>COX19</b>   | 0.04761904762 | 0.04761904762 | 0.16666666667 | 0.16666666667 | 0.2          | 0.2857142857 |
| <b>COX20</b>   | 0.1428571429  | 0.1428571429  | 0.05555555556 | 0.05555555556 | 2.333333333  | 2.571428571  |
| <b>COX4I1</b>  | 0.04761904762 | 0.04761904762 | 0             | 0             | inf          | 4.7619E+31   |
| <b>COX4I2</b>  | 0.09523809524 | 0.09523809524 | 0.11111111111 | 0.11111111111 | 0.6842105263 | 0.8571428571 |
| <b>COX5A</b>   | 0.04761904762 | 0.04761904762 | 0.05555555556 | 0.05555555556 | 0.7          | 0.8571428571 |
| <b>COX5B</b>   | 0             | 0             | 0.11111111111 | 0.11111111111 | 0            | 0            |
| <b>COX6A1</b>  | 0             | 0             | 0.11111111111 | 0.11111111111 | 0            | 0            |
| <b>COX6A2</b>  | 0.04761904762 | 0.04761904762 | 0             | 0             | inf          | 4.7619E+31   |
| <b>COX6B1</b>  | 0.04761904762 | 0.04761904762 | 0.05555555556 | 0.05555555556 | 0.7          | 0.8571428571 |
| <b>COX6B2</b>  | 0.09523809524 | 0.09523809524 | 0.05555555556 | 0.05555555556 | 1.473684211  | 1.714285714  |
| <b>COX6C</b>   | 0.1904761905  | 0.1904761905  | 0.11111111111 | 0.11111111111 | 1.529411765  | 1.714285714  |

|         |               |               |               |               |              |              |
|---------|---------------|---------------|---------------|---------------|--------------|--------------|
| COX7A1  | 0.04761904762 | 0.04761904762 | 0.05555555556 | 0.05555555556 | 0.7          | 0.8571428571 |
| COX7A2  | 0             | 0             | 0.05555555556 | 0.05555555556 | 0            | 0            |
| COX7B2  | 0.04761904762 | 0.04761904762 | 0             | 0             | inf          | 4.7619E+31   |
| COX7C   | 0.04761904762 | 0.04761904762 | 0             | 0             | inf          | 4.7619E+31   |
| CP      | 0.1428571429  | 0.1428571429  | 0.1111111111  | 0.1111111111  | 1.083333333  | 1.285714286  |
| CPA1    | 0.04761904762 | 0.04761904762 | 0.05555555556 | 0.05555555556 | 0.7          | 0.8571428571 |
| CPA2    | 0.04761904762 | 0.04761904762 | 0.05555555556 | 0.05555555556 | 0.7          | 0.8571428571 |
| CPA3    | 0.1428571429  | 0.1428571429  | 0.1111111111  | 0.1111111111  | 1.083333333  | 1.285714286  |
| CPA4    | 0.04761904762 | 0.04761904762 | 0.05555555556 | 0.05555555556 | 0.7          | 0.8571428571 |
| CPA5    | 0.04761904762 | 0.04761904762 | 0.05555555556 | 0.05555555556 | 0.7          | 0.8571428571 |
| CPA6    | 0.1428571429  | 0.1428571429  | 0.1666666667  | 0.1666666667  | 0.6666666667 | 0.8571428571 |
| CPAMD   | 0.1428571429  | 0.1428571429  | 0.1111111111  | 0.1111111111  | 1.083333333  | 1.285714286  |
| CPB1    | 0.1428571429  | 0.1428571429  | 0.1111111111  | 0.1111111111  | 1.083333333  | 1.285714286  |
| CPD     | 0             | 0             | 0.05555555556 | 0.05555555556 | 0            | 0            |
| CPE     | 0             | 0             | 0.1111111111  | 0.1111111111  | 0            | 0            |
| CPEB1   | 0.04761904762 | 0.04761904762 | 0.05555555556 | 0.05555555556 | 0.7          | 0.8571428571 |
| PEB1-AS | 0.04761904762 | 0.04761904762 | 0.05555555556 | 0.05555555556 | 0.7          | 0.8571428571 |
| CPEB2   | 0             | 0             | 0             | 0             |              | 0.00001      |
| PEB2-D  | 0             | 0             | 0             | 0             |              | 0.00001      |
| CPEB3   | 0.1428571429  | 0.1428571429  | 0.1111111111  | 0.1111111111  | 1.083333333  | 1.285714286  |
| CPEB4   | 0             | 0             | 0.05555555556 | 0.05555555556 | 0            | 0            |
| CPED1   | 0.04761904762 | 0.04761904762 | 0.05555555556 | 0.05555555556 | 0.7          | 0.8571428571 |
| CPHXL   | 0.04761904762 | 0.04761904762 | 0             | 0             | inf          | 4.7619E+31   |
| PLANE   | 0.09523809524 | 0.09523809524 | 0.05555555556 | 0.05555555556 | 1.473684211  | 1.714285714  |
| PLANE   | 0.04761904762 | 0.04761904762 | 0.1111111111  | 0.1111111111  | 0.325        | 0.4285714286 |
| CPLX1   | 0.04761904762 | 0.04761904762 | 0             | 0             | inf          | 4.7619E+31   |
| CPLX2   | 0.04761904762 | 0.04761904762 | 0.05555555556 | 0.05555555556 | 0.7          | 0.8571428571 |
| CPLX3   | 0.04761904762 | 0.04761904762 | 0.05555555556 | 0.05555555556 | 0.7          | 0.8571428571 |
| CPLX4   | 0.09523809524 | 0.09523809524 | 0             | 0             | inf          | 9.52381E+31  |
| CPM     | 0.09523809524 | 0.09523809524 | 0.1111111111  | 0.1111111111  | 0.6842105263 | 0.8571428571 |
| CPN1    | 0.1428571429  | 0.1428571429  | 0             | 0             | inf          | 1.42857E+32  |
| CPN2    | 0.09523809524 | 0.09523809524 | 0.05555555556 | 0.05555555556 | 1.473684211  | 1.714285714  |
| CPNE1   | 0.09523809524 | 0.09523809524 | 0.1111111111  | 0.1111111111  | 0.6842105263 | 0.8571428571 |
| CPNE2   | 0.04761904762 | 0.04761904762 | 0             | 0             | inf          | 4.7619E+31   |
| CPNE3   | 0.1904761905  | 0.1904761905  | 0.1111111111  | 0.1111111111  | 1.529411765  | 1.714285714  |
| CPNE4   | 0.1428571429  | 0.1428571429  | 0.05555555556 | 0.05555555556 | 2.333333333  | 2.571428571  |
| CPNE5   | 0.04761904762 | 0.04761904762 | 0.05555555556 | 0.05555555556 | 0.7          | 0.8571428571 |
| CPNE7   | 0.09523809524 | 0.09523809524 | 0             | 0             | inf          | 9.52381E+31  |
| CPNE8   | 0.04761904762 | 0.04761904762 | 0             | 0             | inf          | 4.7619E+31   |
| CPNE9   | 0.09523809524 | 0.09523809524 | 0             | 0             | inf          | 9.52381E+31  |
| CPO     | 0             | 0             | 0.05555555556 | 0.05555555556 | 0            | 0            |
| CPOX    | 0.04761904762 | 0.04761904762 | 0.05555555556 | 0.05555555556 | 0.7          | 0.8571428571 |
| CPPED1  | 0.04761904762 | 0.04761904762 | 0             | 0             | inf          | 4.7619E+31   |
| CPQ     | 0.1904761905  | 0.1904761905  | 0.1666666667  | 0.1666666667  | 0.9411764706 | 1.142857143  |
| CPS1    | 0             | 0             | 0.05555555556 | 0.05555555556 | 0            | 0            |
| PS1-IT  | 0             | 0             | 0.05555555556 | 0.05555555556 | 0            | 0            |
| CPSF1   | 0.04761904762 | 0.04761904762 | 0.1666666667  | 0.1666666667  | 0.2          | 0.2857142857 |
| CPSF3   | 0             | 0             | 0.05555555556 | 0.05555555556 | 0            | 0            |
| CPSF4   | 0.04761904762 | 0.04761904762 | 0.05555555556 | 0.05555555556 | 0.7          | 0.8571428571 |
| CPSF4L  | 0.04761904762 | 0.04761904762 | 0             | 0             | inf          | 4.7619E+31   |
| CPSF6   | 0.09523809524 | 0.09523809524 | 0.1111111111  | 0.1111111111  | 0.6842105263 | 0.8571428571 |

|        |               |               |               |               |              |              |
|--------|---------------|---------------|---------------|---------------|--------------|--------------|
| CPT1B  | 0             | 0             | 0.1111111111  | 0.1111111111  | 0            | 0            |
| CPT1C  | 0.09523809524 | 0.09523809524 | 0.1111111111  | 0.1111111111  | 0.6842105263 | 0.8571428571 |
| CPT2   | 0.04761904762 | 0.04761904762 | 0.05555555556 | 0.05555555556 | 0.7          | 0.8571428571 |
| CPTP   | 0             | 0             | 0.1111111111  | 0.1111111111  | 0            | 0            |
| CPVL   | 0.04761904762 | 0.04761904762 | 0.2222222222  | 0.2222222222  | 0.1375       | 0.2142857143 |
| CPXM1  | 0.1904761905  | 0.1904761905  | 0.05555555556 | 0.05555555556 | 3.294117647  | 3.428571429  |
| CPXM2  | 0.2380952381  | 0.2380952381  | 0.05555555556 | 0.05555555556 | 4.375        | 4.285714286  |
| CR1    | 0.1428571429  | 0.1428571429  | 0             | 0             | inf          | 1.42857E+32  |
| CR1L   | 0.1428571429  | 0.1428571429  | 0             | 0             | inf          | 1.42857E+32  |
| CR2    | 0.1428571429  | 0.1428571429  | 0             | 0             | inf          | 1.42857E+32  |
| CRABP1 | 0.04761904762 | 0.04761904762 | 0.05555555556 | 0.05555555556 | 0.7          | 0.8571428571 |
| CRABP2 | 0.1428571429  | 0.1428571429  | 0.1111111111  | 0.1111111111  | 1.083333333  | 1.285714286  |
| RACR2  | 0.04761904762 | 0.04761904762 | 0.1111111111  | 0.1111111111  | 0.325        | 0.4285714286 |
| RACR2  | 0.04761904762 | 0.04761904762 | 0             | 0             | inf          | 4.7619E+31   |
| CRADD  | 0.04761904762 | 0.04761904762 | 0.05555555556 | 0.05555555556 | 0.7          | 0.8571428571 |
| CRAMP  | 0.09523809524 | 0.09523809524 | 0.2222222222  | 0.2222222222  | 0.2894736842 | 0.4285714286 |
| CRAT37 | 0.04761904762 | 0.04761904762 | 0.05555555556 | 0.05555555556 | 0.7          | 0.8571428571 |
| CRB1   | 0.1428571429  | 0.1428571429  | 0             | 0             | inf          | 1.42857E+32  |
| CRB2   | 0.09523809524 | 0.09523809524 | 0.05555555556 | 0.05555555556 | 1.473684211  | 1.714285714  |
| CRB3   | 0.1428571429  | 0.1428571429  | 0.05555555556 | 0.05555555556 | 2.333333333  | 2.571428571  |
| CRBN   | 0.04761904762 | 0.04761904762 | 0             | 0             | inf          | 4.7619E+31   |
| CRCP   | 0.04761904762 | 0.04761904762 | 0.1111111111  | 0.1111111111  | 0.325        | 0.4285714286 |
| CRCT1  | 0.1904761905  | 0.1904761905  | 0             | 0             | inf          | 1.90476E+32  |
| CREB1  | 0             | 0             | 0.05555555556 | 0.05555555556 | 0            | 0            |
| CREB3  | 0.09523809524 | 0.09523809524 | 0.05555555556 | 0.05555555556 | 1.473684211  | 1.714285714  |
| REB3L  | 0             | 0             | 0.05555555556 | 0.05555555556 | 0            | 0            |
| REB3L  | 0.04761904762 | 0.04761904762 | 0.05555555556 | 0.05555555556 | 0.7          | 0.8571428571 |
| REB3L  | 0.09523809524 | 0.09523809524 | 0.05555555556 | 0.05555555556 | 1.473684211  | 1.714285714  |
| REB3L  | 0.1904761905  | 0.1904761905  | 0.05555555556 | 0.05555555556 | 3.294117647  | 3.428571429  |
| CREB5  | 0.04761904762 | 0.04761904762 | 0.2222222222  | 0.2222222222  | 0.1375       | 0.2142857143 |
| CREBB  | 0.04761904762 | 0.04761904762 | 0.1111111111  | 0.1111111111  | 0.325        | 0.4285714286 |
| CREBL2 | 0.04761904762 | 0.04761904762 | 0.05555555556 | 0.05555555556 | 0.7          | 0.8571428571 |
| CREBR  | 0             | 0             | 0.05555555556 | 0.05555555556 | 0            | 0            |
| CREG1  | 0.1428571429  | 0.1428571429  | 0             | 0             | inf          | 1.42857E+32  |
| CREG2  | 0             | 0             | 0.05555555556 | 0.05555555556 | 0            | 0            |
| CRELD1 | 0.09523809524 | 0.09523809524 | 0             | 0             | inf          | 9.52381E+31  |
| CRELD2 | 0             | 0             | 0.1111111111  | 0.1111111111  | 0            | 0            |
| CREM   | 0.09523809524 | 0.09523809524 | 0.1666666667  | 0.1666666667  | 0.4210526316 | 0.5714285714 |
| CRH    | 0.1428571429  | 0.1428571429  | 0.1666666667  | 0.1666666667  | 0.6666666667 | 0.8571428571 |
| CRHBP  | 0.04761904762 | 0.04761904762 | 0             | 0             | inf          | 4.7619E+31   |
| CRHR1  | 0.1428571429  | 0.1428571429  | 0             | 0             | inf          | 1.42857E+32  |
| CRHR2  | 0.04761904762 | 0.04761904762 | 0.1111111111  | 0.1111111111  | 0.325        | 0.4285714286 |
| CRIM1  | 0             | 0             | 0.05555555556 | 0.05555555556 | 0            | 0            |
| RIM1-D | 0             | 0             | 0.05555555556 | 0.05555555556 | 0            | 0            |
| CRIP3  | 0.04761904762 | 0.04761904762 | 0.05555555556 | 0.05555555556 | 0.7          | 0.8571428571 |
| CRIPAK | 0.04761904762 | 0.04761904762 | 0             | 0             | inf          | 4.7619E+31   |
| CRIP   | 0             | 0             | 0.05555555556 | 0.05555555556 | 0            | 0            |
| CRISP1 | 0.04761904762 | 0.04761904762 | 0             | 0             | inf          | 4.7619E+31   |
| CRISP2 | 0.04761904762 | 0.04761904762 | 0             | 0             | inf          | 4.7619E+31   |
| CRISP3 | 0.04761904762 | 0.04761904762 | 0             | 0             | inf          | 4.7619E+31   |
| RISPLD | 0.1904761905  | 0.1904761905  | 0.1111111111  | 0.1111111111  | 1.529411765  | 1.714285714  |

|         |               |               |               |               |              |              |
|---------|---------------|---------------|---------------|---------------|--------------|--------------|
| RISPLD  | 0.04761904762 | 0.04761904762 | 0             | 0             | inf          | 4.7619E+31   |
| CRK     | 0             | 0             | 0.1111111111  | 0.1111111111  | 0            | 0            |
| CRKL    | 0.04761904762 | 0.04761904762 | 0.05555555556 | 0.05555555556 | 0.7          | 0.8571428571 |
| CRLF1   | 0.1428571429  | 0.1428571429  | 0.1111111111  | 0.1111111111  | 1.083333333  | 1.285714286  |
| CRLF3   | 0             | 0             | 0.05555555556 | 0.05555555556 | 0            | 0            |
| CRLS1   | 0.1904761905  | 0.1904761905  | 0.05555555556 | 0.05555555556 | 3.294117647  | 3.428571429  |
| CRNDE   | 0.04761904762 | 0.04761904762 | 0             | 0             | inf          | 4.7619E+31   |
| CRNKL1  | 0.1904761905  | 0.1904761905  | 0.05555555556 | 0.05555555556 | 3.294117647  | 3.428571429  |
| CRNN    | 0.1904761905  | 0.1904761905  | 0             | 0             | inf          | 1.90476E+32  |
| CROCC   | 0.04761904762 | 0.04761904762 | 0.1111111111  | 0.1111111111  | 0.325        | 0.4285714286 |
| CROCC2  | 0             | 0             | 0.05555555556 | 0.05555555556 | 0            | 0            |
| ROCCP   | 0.04761904762 | 0.04761904762 | 0.1111111111  | 0.1111111111  | 0.325        | 0.4285714286 |
| ROCCP   | 0.04761904762 | 0.04761904762 | 0.1111111111  | 0.1111111111  | 0.325        | 0.4285714286 |
| CROT    | 0.09523809524 | 0.09523809524 | 0.05555555556 | 0.05555555556 | 1.473684211  | 1.714285714  |
| CRP     | 0.1428571429  | 0.1428571429  | 0             | 0             | inf          | 1.42857E+32  |
| CRPPA   | 0.04761904762 | 0.04761904762 | 0.2222222222  | 0.2222222222  | 0.1375       | 0.2142857143 |
| RPPA-AS | 0.04761904762 | 0.04761904762 | 0.2222222222  | 0.2222222222  | 0.1375       | 0.2142857143 |
| CRSP8P  | 0.04761904762 | 0.04761904762 | 0             | 0             | inf          | 4.7619E+31   |
| CRTAC1  | 0.1428571429  | 0.1428571429  | 0             | 0             | inf          | 1.42857E+32  |
| CRTAP   | 0.09523809524 | 0.09523809524 | 0             | 0             | inf          | 9.52381E+31  |
| CRTC1   | 0.1428571429  | 0.1428571429  | 0.1111111111  | 0.1111111111  | 1.083333333  | 1.285714286  |
| CRTC2   | 0.1904761905  | 0.1904761905  | 0.05555555556 | 0.05555555556 | 3.294117647  | 3.428571429  |
| CRTC3   | 0.04761904762 | 0.04761904762 | 0.05555555556 | 0.05555555556 | 0.7          | 0.8571428571 |
| RTC3-AS | 0.04761904762 | 0.04761904762 | 0.05555555556 | 0.05555555556 | 0.7          | 0.8571428571 |
| CRX     | 0.09523809524 | 0.09523809524 | 0.1111111111  | 0.1111111111  | 0.6842105263 | 0.8571428571 |
| CRY1    | 0.04761904762 | 0.04761904762 | 0.05555555556 | 0.05555555556 | 0.7          | 0.8571428571 |
| CRYAA   | 0.04761904762 | 0.04761904762 | 0.1666666667  | 0.1666666667  | 0.2          | 0.2857142857 |
| CRYAA2  | 0.04761904762 | 0.04761904762 | 0.1666666667  | 0.1666666667  | 0.2          | 0.2857142857 |
| CRYBA1  | 0.04761904762 | 0.04761904762 | 0.05555555556 | 0.05555555556 | 0.7          | 0.8571428571 |
| CRYBA2  | 0             | 0             | 0.05555555556 | 0.05555555556 | 0            | 0            |
| CRYBA4  | 0.04761904762 | 0.04761904762 | 0.05555555556 | 0.05555555556 | 0.7          | 0.8571428571 |
| CRYBB1  | 0.04761904762 | 0.04761904762 | 0.05555555556 | 0.05555555556 | 0.7          | 0.8571428571 |
| CRYBB2  | 0.04761904762 | 0.04761904762 | 0.05555555556 | 0.05555555556 | 0.7          | 0.8571428571 |
| RYBB21  | 0.04761904762 | 0.04761904762 | 0.05555555556 | 0.05555555556 | 0.7          | 0.8571428571 |
| CRYBB3  | 0.04761904762 | 0.04761904762 | 0.05555555556 | 0.05555555556 | 0.7          | 0.8571428571 |
| CRYBG2  | 0.04761904762 | 0.04761904762 | 0.1111111111  | 0.1111111111  | 0.325        | 0.4285714286 |
| CRYBG3  | 0.04761904762 | 0.04761904762 | 0.05555555556 | 0.05555555556 | 0.7          | 0.8571428571 |
| CRYGA   | 0             | 0             | 0.05555555556 | 0.05555555556 | 0            | 0            |
| CRYGB   | 0             | 0             | 0.05555555556 | 0.05555555556 | 0            | 0            |
| CRYGC   | 0             | 0             | 0.05555555556 | 0.05555555556 | 0            | 0            |
| CRYGD   | 0             | 0             | 0.05555555556 | 0.05555555556 | 0            | 0            |
| CRYGN   | 0.09523809524 | 0.09523809524 | 0.05555555556 | 0.05555555556 | 1.473684211  | 1.714285714  |
| CRYGS   | 0.09523809524 | 0.09523809524 | 0.05555555556 | 0.05555555556 | 1.473684211  | 1.714285714  |
| CRYL1   | 0.04761904762 | 0.04761904762 | 0             | 0             | inf          | 4.7619E+31   |
| CRYM    | 0.04761904762 | 0.04761904762 | 0             | 0             | inf          | 4.7619E+31   |
| RYM-AS  | 0.04761904762 | 0.04761904762 | 0             | 0             | inf          | 4.7619E+31   |
| CRYZ    | 0.04761904762 | 0.04761904762 | 0.05555555556 | 0.05555555556 | 0.7          | 0.8571428571 |
| CRYZL1  | 0.04761904762 | 0.04761904762 | 0.1111111111  | 0.1111111111  | 0.325        | 0.4285714286 |
| RYZL2   | 0.1428571429  | 0.1428571429  | 0             | 0             | inf          | 1.42857E+32  |
| L2P-SE  | 0.1428571429  | 0.1428571429  | 0             | 0             | inf          | 1.42857E+32  |
| CS      | 0.1428571429  | 0.1428571429  | 0.05555555556 | 0.05555555556 | 2.333333333  | 2.571428571  |

|         |               |               |               |               |              |              |
|---------|---------------|---------------|---------------|---------------|--------------|--------------|
| CSAD    | 0.04761904762 | 0.04761904762 | 0.05555555556 | 0.05555555556 | 0.7          | 0.8571428571 |
| CSDC2   | 0             | 0             | 0.1111111111  | 0.1111111111  | 0            | 0            |
| CSDE1   | 0.04761904762 | 0.04761904762 | 0.05555555556 | 0.05555555556 | 0.7          | 0.8571428571 |
| CSE1L   | 0.09523809524 | 0.09523809524 | 0.1666666667  | 0.1666666667  | 0.4210526316 | 0.5714285714 |
| SE1L-AS | 0.09523809524 | 0.09523809524 | 0.1666666667  | 0.1666666667  | 0.4210526316 | 0.5714285714 |
| CSF1    | 0.04761904762 | 0.04761904762 | 0.05555555556 | 0.05555555556 | 0.7          | 0.8571428571 |
| CSF2    | 0.04761904762 | 0.04761904762 | 0             | 0             | inf          | 4.7619E+31   |
| CSF2RB  | 0             | 0             | 0.1111111111  | 0.1111111111  | 0            | 0            |
| CSF3    | 0.09523809524 | 0.09523809524 | 0             | 0             | inf          | 9.52381E+31  |
| CSF3R   | 0.04761904762 | 0.04761904762 | 0             | 0             | inf          | 4.7619E+31   |
| GALNAC  | 0.09523809524 | 0.09523809524 | 0.1111111111  | 0.1111111111  | 0.6842105263 | 0.8571428571 |
| GALNAC  | 0.1428571429  | 0.1428571429  | 0.05555555556 | 0.05555555556 | 2.333333333  | 2.571428571  |
| CSH1    | 0.04761904762 | 0.04761904762 | 0             | 0             | inf          | 4.7619E+31   |
| CSH2    | 0.04761904762 | 0.04761904762 | 0             | 0             | inf          | 4.7619E+31   |
| CSHL1   | 0.04761904762 | 0.04761904762 | 0             | 0             | inf          | 4.7619E+31   |
| CSK     | 0.04761904762 | 0.04761904762 | 0.05555555556 | 0.05555555556 | 0.7          | 0.8571428571 |
| CSMD1   | 0.1428571429  | 0.1428571429  | 0.1111111111  | 0.1111111111  | 1.083333333  | 1.285714286  |
| CSMD2   | 0.04761904762 | 0.04761904762 | 0             | 0             | inf          | 4.7619E+31   |
| MD2-A   | 0.04761904762 | 0.04761904762 | 0             | 0             | inf          | 4.7619E+31   |
| CSMD3   | 0.1904761905  | 0.1904761905  | 0.1111111111  | 0.1111111111  | 1.529411765  | 1.714285714  |
| CSN1S1  | 0.04761904762 | 0.04761904762 | 0.05555555556 | 0.05555555556 | 0.7          | 0.8571428571 |
| SN1S2A  | 0.04761904762 | 0.04761904762 | 0.05555555556 | 0.05555555556 | 0.7          | 0.8571428571 |
| SN1S2B  | 0.04761904762 | 0.04761904762 | 0.05555555556 | 0.05555555556 | 0.7          | 0.8571428571 |
| CSN2    | 0.04761904762 | 0.04761904762 | 0.05555555556 | 0.05555555556 | 0.7          | 0.8571428571 |
| CSN3    | 0.04761904762 | 0.04761904762 | 0.05555555556 | 0.05555555556 | 0.7          | 0.8571428571 |
| SNK1A1  | 0             | 0             | 0             | 0             |              | 0.00001      |
| CSNK1D  | 0.04761904762 | 0.04761904762 | 0             | 0             | inf          | 4.7619E+31   |
| CSNK1E  | 0.04761904762 | 0.04761904762 | 0.1111111111  | 0.1111111111  | 0.325        | 0.4285714286 |
| SNK1G   | 0.04761904762 | 0.04761904762 | 0.05555555556 | 0.05555555556 | 0.7          | 0.8571428571 |
| SNK1G   | 0.09523809524 | 0.09523809524 | 0.1111111111  | 0.1111111111  | 0.6842105263 | 0.8571428571 |
| NK1G2-A | 0.09523809524 | 0.09523809524 | 0.1111111111  | 0.1111111111  | 0.6842105263 | 0.8571428571 |
| SNK1G   | 0.04761904762 | 0.04761904762 | 0             | 0             | inf          | 4.7619E+31   |
| SNK2A   | 0.1904761905  | 0.1904761905  | 0.05555555556 | 0.05555555556 | 3.294117647  | 3.428571429  |
| SNK2A   | 0.04761904762 | 0.04761904762 | 0             | 0             | inf          | 4.7619E+31   |
| CSNK2B  | 0.04761904762 | 0.04761904762 | 0             | 0             | inf          | 4.7619E+31   |
| SNKA2I  | 0.04761904762 | 0.04761904762 | 0             | 0             | inf          | 4.7619E+31   |
| CSPG4   | 0.04761904762 | 0.04761904762 | 0.05555555556 | 0.05555555556 | 0.7          | 0.8571428571 |
| CSPG5   | 0.09523809524 | 0.09523809524 | 0             | 0             | inf          | 9.52381E+31  |
| CSPP1   | 0.1428571429  | 0.1428571429  | 0.1666666667  | 0.1666666667  | 0.6666666667 | 0.8571428571 |
| CSRNP1  | 0.04761904762 | 0.04761904762 | 0             | 0             | inf          | 4.7619E+31   |
| CSRNP2  | 0.09523809524 | 0.09523809524 | 0.05555555556 | 0.05555555556 | 1.473684211  | 1.714285714  |
| CSRNP3  | 0             | 0             | 0.05555555556 | 0.05555555556 | 0            | 0            |
| CSRP1   | 0.1428571429  | 0.1428571429  | 0             | 0             | inf          | 1.42857E+32  |
| CSRP2   | 0.04761904762 | 0.04761904762 | 0.1111111111  | 0.1111111111  | 0.325        | 0.4285714286 |
| CST1    | 0.1904761905  | 0.1904761905  | 0.05555555556 | 0.05555555556 | 3.294117647  | 3.428571429  |
| CST11   | 0.1904761905  | 0.1904761905  | 0.05555555556 | 0.05555555556 | 3.294117647  | 3.428571429  |
| CST13P  | 0.1904761905  | 0.1904761905  | 0.05555555556 | 0.05555555556 | 3.294117647  | 3.428571429  |
| CST2    | 0.1904761905  | 0.1904761905  | 0.05555555556 | 0.05555555556 | 3.294117647  | 3.428571429  |
| CST3    | 0.1904761905  | 0.1904761905  | 0.05555555556 | 0.05555555556 | 3.294117647  | 3.428571429  |
| CST4    | 0.1904761905  | 0.1904761905  | 0.05555555556 | 0.05555555556 | 3.294117647  | 3.428571429  |
| CST5    | 0.1904761905  | 0.1904761905  | 0.05555555556 | 0.05555555556 | 3.294117647  | 3.428571429  |

|                |               |               |               |               |              |              |
|----------------|---------------|---------------|---------------|---------------|--------------|--------------|
| <b>CST7</b>    | 0.1904761905  | 0.1904761905  | 0.05555555556 | 0.05555555556 | 3.294117647  | 3.428571429  |
| <b>CST8</b>    | 0.1904761905  | 0.1904761905  | 0.05555555556 | 0.05555555556 | 3.294117647  | 3.428571429  |
| <b>CST9</b>    | 0.1904761905  | 0.1904761905  | 0.05555555556 | 0.05555555556 | 3.294117647  | 3.428571429  |
| <b>CST9L</b>   | 0.1904761905  | 0.1904761905  | 0.05555555556 | 0.05555555556 | 3.294117647  | 3.428571429  |
| <b>CSTA</b>    | 0.09523809524 | 0.09523809524 | 0.05555555556 | 0.05555555556 | 1.473684211  | 1.714285714  |
| <b>CSTB</b>    | 0.04761904762 | 0.04761904762 | 0.11111111111 | 0.11111111111 | 0.325        | 0.4285714286 |
| <b>CSTF1</b>   | 0.09523809524 | 0.09523809524 | 0.16666666667 | 0.16666666667 | 0.4210526316 | 0.5714285714 |
| <b>CSTF2T</b>  | 0.04761904762 | 0.04761904762 | 0.05555555556 | 0.05555555556 | 0.7          | 0.8571428571 |
| <b>CSTF3</b>   | 0.04761904762 | 0.04761904762 | 0             | 0             | inf          | 4.7619E+31   |
| <b>STF3-D</b>  | 0.04761904762 | 0.04761904762 | 0             | 0             | inf          | 4.7619E+31   |
| <b>CSTL1</b>   | 0.1904761905  | 0.1904761905  | 0.05555555556 | 0.05555555556 | 3.294117647  | 3.428571429  |
| <b>CT62</b>    | 0.04761904762 | 0.04761904762 | 0.05555555556 | 0.05555555556 | 0.7          | 0.8571428571 |
| <b>CT66</b>    | 0.04761904762 | 0.04761904762 | 0.11111111111 | 0.11111111111 | 0.325        | 0.4285714286 |
| <b>CT75</b>    | 0             | 0             | 0.05555555556 | 0.05555555556 | 0            | 0            |
| <b>CTAGE0</b>  | 0.04761904762 | 0.04761904762 | 0.05555555556 | 0.05555555556 | 0.7          | 0.8571428571 |
| <b>CTAGE1</b>  | 0.04761904762 | 0.04761904762 | 0             | 0             | inf          | 4.7619E+31   |
| <b>CTAGE4</b>  | 0.09523809524 | 0.09523809524 | 0.05555555556 | 0.05555555556 | 1.473684211  | 1.714285714  |
| <b>CTAGE6</b>  | 0.04761904762 | 0.04761904762 | 0             | 0             | inf          | 4.7619E+31   |
| <b>CTAGE8</b>  | 0.09523809524 | 0.09523809524 | 0.05555555556 | 0.05555555556 | 1.473684211  | 1.714285714  |
| <b>B-178M2</b> | 0             | 0             | 0.05555555556 | 0.05555555556 | 0            | 0            |
| <b>CTBP1</b>   | 0.04761904762 | 0.04761904762 | 0             | 0             | inf          | 4.7619E+31   |
| <b>TBP1-A</b>  | 0.04761904762 | 0.04761904762 | 0             | 0             | inf          | 4.7619E+31   |
| <b>TBP1-D</b>  | 0.04761904762 | 0.04761904762 | 0             | 0             | inf          | 4.7619E+31   |
| <b>CTBP2</b>   | 0.2380952381  | 0.2380952381  | 0.05555555556 | 0.05555555556 | 4.375        | 4.285714286  |
| <b>CTBS</b>    | 0.04761904762 | 0.04761904762 | 0.05555555556 | 0.05555555556 | 0.7          | 0.8571428571 |
| <b>C-338M</b>  | 0.09523809524 | 0.09523809524 | 0.05555555556 | 0.05555555556 | 1.473684211  | 1.714285714  |
| <b>CTC1</b>    | 0.04761904762 | 0.04761904762 | 0.05555555556 | 0.05555555556 | 0.7          | 0.8571428571 |
| <b>CTCF</b>    | 0.1428571429  | 0.1428571429  | 0.05555555556 | 0.05555555556 | 2.333333333  | 2.571428571  |
| <b>CTCFL</b>   | 0.1428571429  | 0.1428571429  | 0.2222222222  | 0.2222222222  | 0.4583333333 | 0.6428571429 |
| <b>D-2194D</b> | 0             | 0             | 0.11111111111 | 0.11111111111 | 0            | 0            |
| <b>D-2201H</b> | 0.04761904762 | 0.04761904762 | 0             | 0             | inf          | 4.7619E+31   |
| <b>D-2270F</b> | 0             | 0             | 0.05555555556 | 0.05555555556 | 0            | 0            |
| <b>D-2297D</b> | 0             | 0             | 0.11111111111 | 0.11111111111 | 0            | 0            |
| <b>D-2350J</b> | 0.04761904762 | 0.04761904762 | 0.05555555556 | 0.05555555556 | 0.7          | 0.8571428571 |
| <b>D-3080P</b> | 0             | 0             | 0.05555555556 | 0.05555555556 | 0            | 0            |
| <b>TDNEP</b>   | 0             | 0             | 0.05555555556 | 0.05555555556 | 0            | 0            |
| <b>CTDP1</b>   | 0.04761904762 | 0.04761904762 | 0.05555555556 | 0.05555555556 | 0.7          | 0.8571428571 |
| <b>CTDSP1</b>  | 0             | 0             | 0.05555555556 | 0.05555555556 | 0            | 0            |
| <b>CTDSP2</b>  | 0.1428571429  | 0.1428571429  | 0.05555555556 | 0.05555555556 | 2.333333333  | 2.571428571  |
| <b>CTDSP3</b>  | 0.04761904762 | 0.04761904762 | 0             | 0             | inf          | 4.7619E+31   |
| <b>CTF1</b>    | 0.04761904762 | 0.04761904762 | 0             | 0             | inf          | 4.7619E+31   |
| <b>CTH</b>     | 0.04761904762 | 0.04761904762 | 0.05555555556 | 0.05555555556 | 0.7          | 0.8571428571 |
| <b>CTHRC1</b>  | 0.1904761905  | 0.1904761905  | 0.11111111111 | 0.11111111111 | 1.529411765  | 1.714285714  |
| <b>CTIF</b>    | 0.04761904762 | 0.04761904762 | 0.05555555556 | 0.05555555556 | 0.7          | 0.8571428571 |
| <b>CTLA4</b>   | 0             | 0             | 0.05555555556 | 0.05555555556 | 0            | 0            |
| <b>CTNNA1</b>  | 0.04761904762 | 0.04761904762 | 0             | 0             | inf          | 4.7619E+31   |
| <b>CTNNA2</b>  | 0             | 0             | 0.05555555556 | 0.05555555556 | 0            | 0            |
| <b>CTNNA3</b>  | 0.1428571429  | 0.1428571429  | 0.05555555556 | 0.05555555556 | 2.333333333  | 2.571428571  |
| <b>TNNAL</b>   | 0.04761904762 | 0.04761904762 | 0.05555555556 | 0.05555555556 | 0.7          | 0.8571428571 |
| <b>CTNNB1</b>  | 0.04761904762 | 0.04761904762 | 0             | 0             | inf          | 4.7619E+31   |
| <b>TNNBIP</b>  | 0             | 0             | 0.11111111111 | 0.11111111111 | 0            | 0            |

|        |               |               |               |               |              |              |
|--------|---------------|---------------|---------------|---------------|--------------|--------------|
| TNNBL  | 0.1428571429  | 0.1428571429  | 0.1666666667  | 0.1666666667  | 0.6666666667 | 0.8571428571 |
| CTNND2 | 0.04761904762 | 0.04761904762 | 0.05555555556 | 0.05555555556 | 0.7          | 0.8571428571 |
| CTNS   | 0             | 0             | 0.1111111111  | 0.1111111111  | 0            | 0            |
| CTPS1  | 0.04761904762 | 0.04761904762 | 0.05555555556 | 0.05555555556 | 0.7          | 0.8571428571 |
| CTRB1  | 0.04761904762 | 0.04761904762 | 0             | 0             | inf          | 4.7619E+31   |
| CTRB2  | 0.04761904762 | 0.04761904762 | 0             | 0             | inf          | 4.7619E+31   |
| CTRC   | 0.04761904762 | 0.04761904762 | 0.1111111111  | 0.1111111111  | 0.325        | 0.4285714286 |
| CTRL   | 0.1428571429  | 0.1428571429  | 0.05555555556 | 0.05555555556 | 2.333333333  | 2.571428571  |
| CTSA   | 0.1428571429  | 0.1428571429  | 0.1666666667  | 0.1666666667  | 0.6666666667 | 0.8571428571 |
| CTSB   | 0.09523809524 | 0.09523809524 | 0.1111111111  | 0.1111111111  | 0.6842105263 | 0.8571428571 |
| CTSD   | 0.04761904762 | 0.04761904762 | 0             | 0             | inf          | 4.7619E+31   |
| CTSE   | 0.1428571429  | 0.1428571429  | 0             | 0             | inf          | 1.42857E+32  |
| CTSH   | 0.04761904762 | 0.04761904762 | 0.05555555556 | 0.05555555556 | 0.7          | 0.8571428571 |
| CTSK   | 0.1904761905  | 0.1904761905  | 0.05555555556 | 0.05555555556 | 3.294117647  | 3.428571429  |
| CTSL   | 0             | 0             | 0.05555555556 | 0.05555555556 | 0            | 0            |
| CTSL3P | 0             | 0             | 0.05555555556 | 0.05555555556 | 0            | 0            |
| CTSLP2 | 0.1428571429  | 0.1428571429  | 0.05555555556 | 0.05555555556 | 2.333333333  | 2.571428571  |
| CTSLP8 | 0             | 0             | 0.05555555556 | 0.05555555556 | 0            | 0            |
| CTSO   | 0             | 0             | 0.1111111111  | 0.1111111111  | 0            | 0            |
| CTSS   | 0.1904761905  | 0.1904761905  | 0.05555555556 | 0.05555555556 | 3.294117647  | 3.428571429  |
| CTSV   | 0.04761904762 | 0.04761904762 | 0             | 0             | inf          | 4.7619E+31   |
| CTSZ   | 0.1428571429  | 0.1428571429  | 0.2222222222  | 0.2222222222  | 0.4583333333 | 0.6428571429 |
| TTNBP  | 0.09523809524 | 0.09523809524 | 0.05555555556 | 0.05555555556 | 1.473684211  | 1.714285714  |
| TNBP21 | 0.04761904762 | 0.04761904762 | 0.05555555556 | 0.05555555556 | 0.7          | 0.8571428571 |
| CTU1   | 0.09523809524 | 0.09523809524 | 0.05555555556 | 0.05555555556 | 1.473684211  | 1.714285714  |
| CTU2   | 0.1904761905  | 0.1904761905  | 0             | 0             | inf          | 1.90476E+32  |
| CTXN1  | 0.1428571429  | 0.1428571429  | 0.05555555556 | 0.05555555556 | 2.333333333  | 2.571428571  |
| CTXN2  | 0.04761904762 | 0.04761904762 | 0.05555555556 | 0.05555555556 | 0.7          | 0.8571428571 |
| CTXN3  | 0.04761904762 | 0.04761904762 | 0             | 0             | inf          | 4.7619E+31   |
| CTXND1 | 0.04761904762 | 0.04761904762 | 0.05555555556 | 0.05555555556 | 0.7          | 0.8571428571 |
| CTXND2 | 0.1904761905  | 0.1904761905  | 0.05555555556 | 0.05555555556 | 3.294117647  | 3.428571429  |
| CUBN   | 0.09523809524 | 0.09523809524 | 0.1111111111  | 0.1111111111  | 0.6842105263 | 0.8571428571 |
| CUEDC1 | 0.09523809524 | 0.09523809524 | 0             | 0             | inf          | 9.52381E+31  |
| CUEDC2 | 0.1428571429  | 0.1428571429  | 0.05555555556 | 0.05555555556 | 2.333333333  | 2.571428571  |
| CUL1   | 0.09523809524 | 0.09523809524 | 0.05555555556 | 0.05555555556 | 1.473684211  | 1.714285714  |
| CUL2   | 0.09523809524 | 0.09523809524 | 0.1666666667  | 0.1666666667  | 0.4210526316 | 0.5714285714 |
| CUL3   | 0             | 0             | 0.05555555556 | 0.05555555556 | 0            | 0            |
| CUL7   | 0.04761904762 | 0.04761904762 | 0.05555555556 | 0.05555555556 | 0.7          | 0.8571428571 |
| CUL9   | 0.04761904762 | 0.04761904762 | 0.05555555556 | 0.05555555556 | 0.7          | 0.8571428571 |
| CUTA   | 0.04761904762 | 0.04761904762 | 0             | 0             | inf          | 4.7619E+31   |
| CUTAL1 | 0.09523809524 | 0.09523809524 | 0.05555555556 | 0.05555555556 | 1.473684211  | 1.714285714  |
| CUTC   | 0.1428571429  | 0.1428571429  | 0             | 0             | inf          | 1.42857E+32  |
| CUX1   | 0.04761904762 | 0.04761904762 | 0.05555555556 | 0.05555555556 | 0.7          | 0.8571428571 |
| CUX2   | 0             | 0             | 0.1111111111  | 0.1111111111  | 0            | 0            |
| CUZD1  | 0.2380952381  | 0.2380952381  | 0.05555555556 | 0.05555555556 | 4.375        | 4.285714286  |
| CWC22  | 0             | 0             | 0.05555555556 | 0.05555555556 | 0            | 0            |
| CWC25  | 0.09523809524 | 0.09523809524 | 0             | 0             | inf          | 9.52381E+31  |
| CWC27  | 0.04761904762 | 0.04761904762 | 0             | 0             | inf          | 4.7619E+31   |
| WF19L  | 0.1428571429  | 0.1428571429  | 0             | 0             | inf          | 1.42857E+32  |
| CWH43  | 0.09523809524 | 0.09523809524 | 0.1111111111  | 0.1111111111  | 0.6842105263 | 0.8571428571 |
| CX3CL1 | 0.04761904762 | 0.04761904762 | 0             | 0             | inf          | 4.7619E+31   |

|                |               |               |               |               |             |              |
|----------------|---------------|---------------|---------------|---------------|-------------|--------------|
| <b>CX3CR1</b>  | 0.04761904762 | 0.04761904762 | 0             | 0             | inf         | 4.7619E+31   |
| <b>CXADR0</b>  | 0.04761904762 | 0.04761904762 | 0.1111111111  | 0.1111111111  | 0.325       | 0.4285714286 |
| <b>XADRP</b>   | 0.2857142857  | 0.2857142857  | 0.1111111111  | 0.1111111111  | 2.6         | 2.571428571  |
| <b>XADRP0</b>  | 0.09523809524 | 0.09523809524 | 0.05555555556 | 0.05555555556 | 1.473684211 | 1.714285714  |
| <b>CXCL1</b>   | 0.09523809524 | 0.09523809524 | 0.05555555556 | 0.05555555556 | 1.473684211 | 1.714285714  |
| <b>CXCL10</b>  | 0.04761904762 | 0.04761904762 | 0.05555555556 | 0.05555555556 | 0.7         | 0.8571428571 |
| <b>CXCL11</b>  | 0.04761904762 | 0.04761904762 | 0.05555555556 | 0.05555555556 | 0.7         | 0.8571428571 |
| <b>CXCL12</b>  | 0.1428571429  | 0.1428571429  | 0.05555555556 | 0.05555555556 | 2.333333333 | 2.571428571  |
| <b>CXCL13</b>  | 0.04761904762 | 0.04761904762 | 0.05555555556 | 0.05555555556 | 0.7         | 0.8571428571 |
| <b>CXCL14</b>  | 0.04761904762 | 0.04761904762 | 0             | 0             | inf         | 4.7619E+31   |
| <b>CXCL16</b>  | 0             | 0             | 0.1111111111  | 0.1111111111  | 0           | 0            |
| <b>CXCL17</b>  | 0.04761904762 | 0.04761904762 | 0.05555555556 | 0.05555555556 | 0.7         | 0.8571428571 |
| <b>CXCL2</b>   | 0.09523809524 | 0.09523809524 | 0.05555555556 | 0.05555555556 | 1.473684211 | 1.714285714  |
| <b>CXCL3</b>   | 0.09523809524 | 0.09523809524 | 0.05555555556 | 0.05555555556 | 1.473684211 | 1.714285714  |
| <b>CXCL5</b>   | 0.09523809524 | 0.09523809524 | 0.05555555556 | 0.05555555556 | 1.473684211 | 1.714285714  |
| <b>CXCL6</b>   | 0.09523809524 | 0.09523809524 | 0.05555555556 | 0.05555555556 | 1.473684211 | 1.714285714  |
| <b>CXCL8</b>   | 0.09523809524 | 0.09523809524 | 0.05555555556 | 0.05555555556 | 1.473684211 | 1.714285714  |
| <b>CXCL9</b>   | 0.04761904762 | 0.04761904762 | 0.05555555556 | 0.05555555556 | 0.7         | 0.8571428571 |
| <b>CXCR1</b>   | 0             | 0             | 0.05555555556 | 0.05555555556 | 0           | 0            |
| <b>CXCR2</b>   | 0             | 0             | 0.05555555556 | 0.05555555556 | 0           | 0            |
| <b>XCR2P</b>   | 0             | 0             | 0.05555555556 | 0.05555555556 | 0           | 0            |
| <b>CXCR4</b>   | 0             | 0             | 0.05555555556 | 0.05555555556 | 0           | 0            |
| <b>CXXC1</b>   | 0.04761904762 | 0.04761904762 | 0             | 0             | inf         | 4.7619E+31   |
| <b>CXXC4</b>   | 0             | 0             | 0.05555555556 | 0.05555555556 | 0           | 0            |
| <b>XXC4-A</b>  | 0             | 0             | 0.05555555556 | 0.05555555556 | 0           | 0            |
| <b>CXXC5</b>   | 0.04761904762 | 0.04761904762 | 0             | 0             | inf         | 4.7619E+31   |
| <b>XXC5-A0</b> | 0.04761904762 | 0.04761904762 | 0             | 0             | inf         | 4.7619E+31   |
| <b>CYB561</b>  | 0.04761904762 | 0.04761904762 | 0             | 0             | inf         | 4.7619E+31   |
| <b>YB561D0</b> | 0.04761904762 | 0.04761904762 | 0.05555555556 | 0.05555555556 | 0.7         | 0.8571428571 |
| <b>YB561D0</b> | 0.09523809524 | 0.09523809524 | 0             | 0             | inf         | 9.52381E+31  |
| <b>CYB5B</b>   | 0.1428571429  | 0.1428571429  | 0.05555555556 | 0.05555555556 | 2.333333333 | 2.571428571  |
| <b>CYB5D1</b>  | 0             | 0             | 0.05555555556 | 0.05555555556 | 0           | 0            |
| <b>CYB5D2</b>  | 0             | 0             | 0.1111111111  | 0.1111111111  | 0           | 0            |
| <b>CYB5R1</b>  | 0.1428571429  | 0.1428571429  | 0             | 0             | inf         | 1.42857E+32  |
| <b>CYB5R2</b>  | 0.04761904762 | 0.04761904762 | 0             | 0             | inf         | 4.7619E+31   |
| <b>CYB5R10</b> | 0.04761904762 | 0.04761904762 | 0.05555555556 | 0.05555555556 | 0.7         | 0.8571428571 |
| <b>CYBA</b>    | 0.1428571429  | 0.1428571429  | 0             | 0             | inf         | 1.42857E+32  |
| <b>CYBC1</b>   | 0.04761904762 | 0.04761904762 | 0             | 0             | inf         | 4.7619E+31   |
| <b>CYBRD1</b>  | 0             | 0             | 0.05555555556 | 0.05555555556 | 0           | 0            |
| <b>CYC1</b>    | 0.04761904762 | 0.04761904762 | 0.1666666667  | 0.1666666667  | 0.2         | 0.2857142857 |
| <b>CYCS</b>    | 0.04761904762 | 0.04761904762 | 0.2222222222  | 0.2222222222  | 0.1375      | 0.2142857143 |
| <b>CYCSP5</b>  | 0.1428571429  | 0.1428571429  | 0.05555555556 | 0.05555555556 | 2.333333333 | 2.571428571  |
| <b>CYFIP1</b>  | 0.09523809524 | 0.09523809524 | 0             | 0             | inf         | 9.52381E+31  |
| <b>CYFIP2</b>  | 0.04761904762 | 0.04761904762 | 0.05555555556 | 0.05555555556 | 0.7         | 0.8571428571 |
| <b>CYGB</b>    | 0.04761904762 | 0.04761904762 | 0             | 0             | inf         | 4.7619E+31   |
| <b>CYHR1</b>   | 0.04761904762 | 0.04761904762 | 0.1666666667  | 0.1666666667  | 0.2         | 0.2857142857 |
| <b>CYLC2</b>   | 0.04761904762 | 0.04761904762 | 0             | 0             | inf         | 4.7619E+31   |
| <b>CYLD</b>    | 0.04761904762 | 0.04761904762 | 0             | 0             | inf         | 4.7619E+31   |
| <b>CYMP</b>    | 0.04761904762 | 0.04761904762 | 0             | 0             | inf         | 4.7619E+31   |
| <b>YMP-AS0</b> | 0.04761904762 | 0.04761904762 | 0             | 0             | inf         | 4.7619E+31   |
| <b>CYP11A</b>  | 0.04761904762 | 0.04761904762 | 0.05555555556 | 0.05555555556 | 0.7         | 0.8571428571 |



|         |               |               |              |              |              |              |
|---------|---------------|---------------|--------------|--------------|--------------|--------------|
| CYP11B  | 0.04761904762 | 0.04761904762 | 0.1666666667 | 0.1666666667 | 0.2          | 0.2857142857 |
| CYP11B  | 0.04761904762 | 0.04761904762 | 0.1666666667 | 0.1666666667 | 0.2          | 0.2857142857 |
| CYP17A  | 0.1428571429  | 0.1428571429  | 0.0555555556 | 0.0555555556 | 2.333333333  | 2.571428571  |
| CYP19A  | 0.04761904762 | 0.04761904762 | 0.0555555556 | 0.0555555556 | 0.7          | 0.8571428571 |
| CYP1A1  | 0.04761904762 | 0.04761904762 | 0.0555555556 | 0.0555555556 | 0.7          | 0.8571428571 |
| CYP1A2  | 0.04761904762 | 0.04761904762 | 0.0555555556 | 0.0555555556 | 0.7          | 0.8571428571 |
| CYP1B1  | 0             | 0             | 0.0555555556 | 0.0555555556 | 0            | 0            |
| P1B1-A  | 0             | 0             | 0.0555555556 | 0.0555555556 | 0            | 0            |
| CYP20A  | 0.09523809524 | 0.09523809524 | 0.0555555556 | 0.0555555556 | 1.473684211  | 1.714285714  |
| YP21A1  | 0.04761904762 | 0.04761904762 | 0            | 0            | inf          | 4.7619E+31   |
| CYP21A2 | 0.04761904762 | 0.04761904762 | 0            | 0            | inf          | 4.7619E+31   |
| CYP24A  | 0.09523809524 | 0.09523809524 | 0.1111111111 | 0.1111111111 | 0.6842105263 | 0.8571428571 |
| CYP26A  | 0.1428571429  | 0.1428571429  | 0.1111111111 | 0.1111111111 | 1.083333333  | 1.285714286  |
| CYP26B  | 0             | 0             | 0.0555555556 | 0.0555555556 | 0            | 0            |
| CYP26C  | 0.1428571429  | 0.1428571429  | 0.1111111111 | 0.1111111111 | 1.083333333  | 1.285714286  |
| CYP27A  | 0             | 0             | 0.0555555556 | 0.0555555556 | 0            | 0            |
| CYP27B  | 0.1428571429  | 0.1428571429  | 0.0555555556 | 0.0555555556 | 2.333333333  | 2.571428571  |
| CYP27C  | 0             | 0             | 0.0555555556 | 0.0555555556 | 0            | 0            |
| CYP2A13 | 0.04761904762 | 0.04761904762 | 0.0555555556 | 0.0555555556 | 0.7          | 0.8571428571 |
| CYP2A6  | 0.04761904762 | 0.04761904762 | 0.0555555556 | 0.0555555556 | 0.7          | 0.8571428571 |
| CYP2A7  | 0.04761904762 | 0.04761904762 | 0.0555555556 | 0.0555555556 | 0.7          | 0.8571428571 |
| CYP2B6  | 0.04761904762 | 0.04761904762 | 0.0555555556 | 0.0555555556 | 0.7          | 0.8571428571 |
| CYP2B7  | 0.04761904762 | 0.04761904762 | 0.0555555556 | 0.0555555556 | 0.7          | 0.8571428571 |
| CYP2C18 | 0.1428571429  | 0.1428571429  | 0            | 0            | inf          | 1.42857E+32  |
| CYP2C19 | 0.1428571429  | 0.1428571429  | 0            | 0            | inf          | 1.42857E+32  |
| CYP2C8  | 0.1428571429  | 0.1428571429  | 0            | 0            | inf          | 1.42857E+32  |
| CYP2C9  | 0.1428571429  | 0.1428571429  | 0            | 0            | inf          | 1.42857E+32  |
| CYP2D6  | 0             | 0             | 0.1111111111 | 0.1111111111 | 0            | 0            |
| CYP2D7  | 0             | 0             | 0.1111111111 | 0.1111111111 | 0            | 0            |
| CYP2E1  | 0.1904761905  | 0.1904761905  | 0            | 0            | inf          | 1.90476E+32  |
| CYP2F1  | 0.04761904762 | 0.04761904762 | 0.0555555556 | 0.0555555556 | 0.7          | 0.8571428571 |
| YP2G1   | 0.04761904762 | 0.04761904762 | 0.0555555556 | 0.0555555556 | 0.7          | 0.8571428571 |
| CYP2J2  | 0.04761904762 | 0.04761904762 | 0.0555555556 | 0.0555555556 | 0.7          | 0.8571428571 |
| CYP2S1  | 0.04761904762 | 0.04761904762 | 0.0555555556 | 0.0555555556 | 0.7          | 0.8571428571 |
| CYP2U1  | 0             | 0             | 0.0555555556 | 0.0555555556 | 0            | 0            |
| CYP2W1  | 0.04761904762 | 0.04761904762 | 0.1666666667 | 0.1666666667 | 0.2          | 0.2857142857 |
| CYP39A  | 0.04761904762 | 0.04761904762 | 0.0555555556 | 0.0555555556 | 0.7          | 0.8571428571 |
| CYP3A4  | 0.04761904762 | 0.04761904762 | 0.0555555556 | 0.0555555556 | 0.7          | 0.8571428571 |
| CYP3A43 | 0.04761904762 | 0.04761904762 | 0.0555555556 | 0.0555555556 | 0.7          | 0.8571428571 |
| CYP3A5  | 0.04761904762 | 0.04761904762 | 0.0555555556 | 0.0555555556 | 0.7          | 0.8571428571 |
| CYP3A7  | 0.04761904762 | 0.04761904762 | 0.0555555556 | 0.0555555556 | 0.7          | 0.8571428571 |
| A7-CYP  | 0.04761904762 | 0.04761904762 | 0.0555555556 | 0.0555555556 | 0.7          | 0.8571428571 |
| CYP4A1  | 0.04761904762 | 0.04761904762 | 0.0555555556 | 0.0555555556 | 0.7          | 0.8571428571 |
| CYP4A2  | 0.04761904762 | 0.04761904762 | 0.0555555556 | 0.0555555556 | 0.7          | 0.8571428571 |
| CYP4B1  | 0.04761904762 | 0.04761904762 | 0.0555555556 | 0.0555555556 | 0.7          | 0.8571428571 |
| CYP4F1  | 0.1428571429  | 0.1428571429  | 0.1111111111 | 0.1111111111 | 1.083333333  | 1.285714286  |
| CYP4F12 | 0.1428571429  | 0.1428571429  | 0.1111111111 | 0.1111111111 | 1.083333333  | 1.285714286  |
| CYP4F2  | 0.1428571429  | 0.1428571429  | 0.1111111111 | 0.1111111111 | 1.083333333  | 1.285714286  |
| CYP4F22 | 0.1428571429  | 0.1428571429  | 0.1111111111 | 0.1111111111 | 1.083333333  | 1.285714286  |
| YP4F24  | 0.1428571429  | 0.1428571429  | 0.1111111111 | 0.1111111111 | 1.083333333  | 1.285714286  |
| YP4F29  | 0.04761904762 | 0.04761904762 | 0            | 0            | inf          | 4.7619E+31   |

|         |               |               |              |              |              |              |
|---------|---------------|---------------|--------------|--------------|--------------|--------------|
| CYP4F3  | 0.1428571429  | 0.1428571429  | 0.1111111111 | 0.1111111111 | 1.083333333  | 1.285714286  |
| YP4F30  | 0             | 0             | 0.0555555556 | 0.0555555556 | 0            | 0            |
| YP4F35  | 0.09523809524 | 0.09523809524 | 0.0555555556 | 0.0555555556 | 1.473684211  | 1.714285714  |
| YP4F62  | 0             | 0             | 0.0555555556 | 0.0555555556 | 0            | 0            |
| CYP4F8  | 0.1428571429  | 0.1428571429  | 0.1111111111 | 0.1111111111 | 1.083333333  | 1.285714286  |
| CYP4V2  | 0             | 0             | 0.0555555556 | 0.0555555556 | 0            | 0            |
| CYP4X1  | 0.04761904762 | 0.04761904762 | 0.0555555556 | 0.0555555556 | 0.7          | 0.8571428571 |
| CYP4Z1  | 0.04761904762 | 0.04761904762 | 0.0555555556 | 0.0555555556 | 0.7          | 0.8571428571 |
| YP4Z21  | 0.04761904762 | 0.04761904762 | 0.0555555556 | 0.0555555556 | 0.7          | 0.8571428571 |
| YP51A   | 0.04761904762 | 0.04761904762 | 0.1111111111 | 0.1111111111 | 0.325        | 0.4285714286 |
| P51A1-A | 0.04761904762 | 0.04761904762 | 0.1111111111 | 0.1111111111 | 0.325        | 0.4285714286 |
| CYP7A1  | 0.1428571429  | 0.1428571429  | 0.1666666667 | 0.1666666667 | 0.6666666667 | 0.8571428571 |
| CYP7B1  | 0.1428571429  | 0.1428571429  | 0.1666666667 | 0.1666666667 | 0.6666666667 | 0.8571428571 |
| CYP8B1  | 0.04761904762 | 0.04761904762 | 0            | 0            | inf          | 4.7619E+31   |
| CYREN   | 0.04761904762 | 0.04761904762 | 0.0555555556 | 0.0555555556 | 0.7          | 0.8571428571 |
| CYS1    | 0             | 0             | 0.0555555556 | 0.0555555556 | 0            | 0            |
| CYSRT1  | 0.1428571429  | 0.1428571429  | 0.0555555556 | 0.0555555556 | 2.333333333  | 2.571428571  |
| CYSTM   | 0.04761904762 | 0.04761904762 | 0            | 0            | inf          | 4.7619E+31   |
| CYTH1   | 0.04761904762 | 0.04761904762 | 0            | 0            | inf          | 4.7619E+31   |
| CYTH2   | 0.09523809524 | 0.09523809524 | 0.1111111111 | 0.1111111111 | 0.6842105263 | 0.8571428571 |
| CYTH3   | 0.04761904762 | 0.04761904762 | 0.1666666667 | 0.1666666667 | 0.2          | 0.2857142857 |
| CYTH4   | 0             | 0             | 0.1111111111 | 0.1111111111 | 0            | 0            |
| CYTIP   | 0             | 0             | 0.0555555556 | 0.0555555556 | 0            | 0            |
| CYTOR   | 0             | 0             | 0.0555555556 | 0.0555555556 | 0            | 0            |
| CYYR1   | 0.04761904762 | 0.04761904762 | 0.1111111111 | 0.1111111111 | 0.325        | 0.4285714286 |
| YYR1-A  | 0.04761904762 | 0.04761904762 | 0.1111111111 | 0.1111111111 | 0.325        | 0.4285714286 |
| ZIP-ASN | 0.04761904762 | 0.04761904762 | 0.0555555556 | 0.0555555556 | 0.7          | 0.8571428571 |
| CZIB    | 0.04761904762 | 0.04761904762 | 0.0555555556 | 0.0555555556 | 0.7          | 0.8571428571 |
| 21S2088 | 0.04761904762 | 0.04761904762 | 0.1111111111 | 0.1111111111 | 0.325        | 0.4285714286 |
| 2HGDI   | 0             | 0             | 0.0555555556 | 0.0555555556 | 0            | 0            |
| DAAM2   | 0.04761904762 | 0.04761904762 | 0.0555555556 | 0.0555555556 | 0.7          | 0.8571428571 |
| DAB1    | 0.04761904762 | 0.04761904762 | 0.0555555556 | 0.0555555556 | 0.7          | 0.8571428571 |
| AB1-AS  | 0.04761904762 | 0.04761904762 | 0.0555555556 | 0.0555555556 | 0.7          | 0.8571428571 |
| DAB2    | 0.04761904762 | 0.04761904762 | 0.0555555556 | 0.0555555556 | 0.7          | 0.8571428571 |
| DAB2IP  | 0.09523809524 | 0.09523809524 | 0.0555555556 | 0.0555555556 | 1.473684211  | 1.714285714  |
| DACT3   | 0.09523809524 | 0.09523809524 | 0.1111111111 | 0.1111111111 | 0.6842105263 | 0.8571428571 |
| ACT3-AS | 0.09523809524 | 0.09523809524 | 0.1111111111 | 0.1111111111 | 0.6842105263 | 0.8571428571 |
| DAD1    | 0             | 0             | 0.0555555556 | 0.0555555556 | 0            | 0            |
| DAG1    | 0.1428571429  | 0.1428571429  | 0            | 0            | inf          | 1.42857E+32  |
| DALRD3  | 0.09523809524 | 0.09523809524 | 0            | 0            | inf          | 9.52381E+31  |
| DANCR   | 0.2380952381  | 0.2380952381  | 0.0555555556 | 0.0555555556 | 4.375        | 4.285714286  |
| DAND5   | 0.1428571429  | 0.1428571429  | 0.1111111111 | 0.1111111111 | 1.083333333  | 1.285714286  |
| DAO     | 0             | 0             | 0.0555555556 | 0.0555555556 | 0            | 0            |
| DAP     | 0.04761904762 | 0.04761904762 | 0.0555555556 | 0.0555555556 | 0.7          | 0.8571428571 |
| DAP3    | 0.1904761905  | 0.1904761905  | 0.1111111111 | 0.1111111111 | 1.529411765  | 1.714285714  |
| DAPK1   | 0             | 0             | 0.0555555556 | 0.0555555556 | 0            | 0            |
| APK1-IT | 0             | 0             | 0.0555555556 | 0.0555555556 | 0            | 0            |
| DAPK2   | 0.04761904762 | 0.04761904762 | 0.0555555556 | 0.0555555556 | 0.7          | 0.8571428571 |
| DAPK3   | 0.09523809524 | 0.09523809524 | 0.0555555556 | 0.0555555556 | 1.473684211  | 1.714285714  |
| DAPL1   | 0             | 0             | 0.0555555556 | 0.0555555556 | 0            | 0            |
| DAPP1   | 0             | 0             | 0.0555555556 | 0.0555555556 | 0            | 0            |

|         |               |               |               |               |               |              |
|---------|---------------|---------------|---------------|---------------|---------------|--------------|
| DARS    | 0.04761904762 | 0.04761904762 | 0.05555555556 | 0.05555555556 | 0.7           | 0.8571428571 |
| ARS-AS  | 0.04761904762 | 0.04761904762 | 0.05555555556 | 0.05555555556 | 0.7           | 0.8571428571 |
| DARS2   | 0.1428571429  | 0.1428571429  | 0             | 0             | inf           | 1.42857E+32  |
| DAW1    | 0             | 0             | 0.05555555556 | 0.05555555556 | 0             | 0            |
| DAXX    | 0.04761904762 | 0.04761904762 | 0             | 0             | inf           | 4.7619E+31   |
| DAZAP1  | 0.09523809524 | 0.09523809524 | 0.11111111111 | 0.11111111111 | 0.6842105263  | 0.8571428571 |
| DAZAP2  | 0.09523809524 | 0.09523809524 | 0.05555555556 | 0.05555555556 | 1.473684211   | 1.714285714  |
| DAZL    | 0.04761904762 | 0.04761904762 | 0             | 0             | inf           | 4.7619E+31   |
| DBET    | 0.04761904762 | 0.04761904762 | 0.05555555556 | 0.05555555556 | 0.7           | 0.8571428571 |
| DBF4    | 0.09523809524 | 0.09523809524 | 0.05555555556 | 0.05555555556 | 1.473684211   | 1.714285714  |
| DBF4B   | 0.09523809524 | 0.09523809524 | 0             | 0             | inf           | 9.52381E+31  |
| DBH     | 0.04761904762 | 0.04761904762 | 0             | 0             | inf           | 4.7619E+31   |
| DBH-AS  | 0.04761904762 | 0.04761904762 | 0             | 0             | inf           | 4.7619E+31   |
| DBI     | 0             | 0             | 0.05555555556 | 0.05555555556 | 0             | 0            |
| DBIL5P2 | 0             | 0             | 0.05555555556 | 0.05555555556 | 0             | 0            |
| DBN1    | 0.09523809524 | 0.09523809524 | 0.05555555556 | 0.05555555556 | 1.473684211   | 1.714285714  |
| DBNDD1  | 0.09523809524 | 0.09523809524 | 0             | 0             | inf           | 9.52381E+31  |
| DBNDD2  | 0.1428571429  | 0.1428571429  | 0.16666666667 | 0.16666666667 | 0.66666666667 | 0.8571428571 |
| DBNL    | 0.04761904762 | 0.04761904762 | 0.16666666667 | 0.16666666667 | 0.2           | 0.2857142857 |
| DBP     | 0.09523809524 | 0.09523809524 | 0.11111111111 | 0.11111111111 | 0.6842105263  | 0.8571428571 |
| DBR1    | 0.1428571429  | 0.1428571429  | 0.05555555556 | 0.05555555556 | 2.333333333   | 2.571428571  |
| DBT     | 0.04761904762 | 0.04761904762 | 0.05555555556 | 0.05555555556 | 0.7           | 0.8571428571 |
| DBX2    | 0.04761904762 | 0.04761904762 | 0.05555555556 | 0.05555555556 | 0.7           | 0.8571428571 |
| DCAF1   | 0.04761904762 | 0.04761904762 | 0             | 0             | inf           | 4.7619E+31   |
| DCAF10  | 0.09523809524 | 0.09523809524 | 0.05555555556 | 0.05555555556 | 1.473684211   | 1.714285714  |
| DCAF12  | 0.09523809524 | 0.09523809524 | 0.05555555556 | 0.05555555556 | 1.473684211   | 1.714285714  |
| DCAF13  | 0.1904761905  | 0.1904761905  | 0.11111111111 | 0.11111111111 | 1.529411765   | 1.714285714  |
| CAF13P  | 0.1428571429  | 0.1428571429  | 0.05555555556 | 0.05555555556 | 2.333333333   | 2.571428571  |
| DCAF15  | 0.1428571429  | 0.1428571429  | 0.11111111111 | 0.11111111111 | 1.083333333   | 1.285714286  |
| DCAF16  | 0             | 0             | 0             | 0             |               | 0.00001      |
| DCAF17  | 0             | 0             | 0.05555555556 | 0.05555555556 | 0             | 0            |
| DCAF4   | 0.09523809524 | 0.09523809524 | 0             | 0             | inf           | 9.52381E+31  |
| DCAF4L  | 0.04761904762 | 0.04761904762 | 0             | 0             | inf           | 4.7619E+31   |
| DCAF4L  | 0.1904761905  | 0.1904761905  | 0.16666666667 | 0.16666666667 | 0.9411764706  | 1.142857143  |
| DCAF6   | 0.1428571429  | 0.1428571429  | 0             | 0             | inf           | 1.42857E+32  |
| DCAF7   | 0.04761904762 | 0.04761904762 | 0             | 0             | inf           | 4.7619E+31   |
| DCAF8   | 0.1428571429  | 0.1428571429  | 0             | 0             | inf           | 1.42857E+32  |
| DCAKD   | 0.1428571429  | 0.1428571429  | 0             | 0             | inf           | 1.42857E+32  |
| DCANP1  | 0.04761904762 | 0.04761904762 | 0             | 0             | inf           | 4.7619E+31   |
| DCBLD2  | 0.09523809524 | 0.09523809524 | 0.05555555556 | 0.05555555556 | 1.473684211   | 1.714285714  |
| DCC     | 0.09523809524 | 0.09523809524 | 0             | 0             | inf           | 9.52381E+31  |
| DCDC2   | 0             | 0             | 0.05555555556 | 0.05555555556 | 0             | 0            |
| DCDC2B  | 0.04761904762 | 0.04761904762 | 0.11111111111 | 0.11111111111 | 0.325         | 0.4285714286 |
| DCDC2C  | 0             | 0             | 0.05555555556 | 0.05555555556 | 0             | 0            |
| DCHS1   | 0.04761904762 | 0.04761904762 | 0             | 0             | inf           | 4.7619E+31   |
| DCHS2   | 0             | 0             | 0.05555555556 | 0.05555555556 | 0             | 0            |
| DCK     | 0.09523809524 | 0.09523809524 | 0.05555555556 | 0.05555555556 | 1.473684211   | 1.714285714  |
| DCLK2   | 0             | 0             | 0.05555555556 | 0.05555555556 | 0             | 0            |
| DCLK3   | 0.04761904762 | 0.04761904762 | 0             | 0             | inf           | 4.7619E+31   |
| CLRE1   | 0.1428571429  | 0.1428571429  | 0.05555555556 | 0.05555555556 | 2.333333333   | 2.571428571  |
| CLRE10  | 0.04761904762 | 0.04761904762 | 0.05555555556 | 0.05555555556 | 0.7           | 0.8571428571 |

|         |               |               |               |               |              |              |
|---------|---------------|---------------|---------------|---------------|--------------|--------------|
| CLRE1C  | 0.09523809524 | 0.09523809524 | 0.1111111111  | 0.1111111111  | 0.6842105263 | 0.8571428571 |
| LRE1C   | 0.09523809524 | 0.09523809524 | 0.1111111111  | 0.1111111111  | 0.6842105263 | 0.8571428571 |
| DCN     | 0.04761904762 | 0.04761904762 | 0.05555555556 | 0.05555555556 | 0.7          | 0.8571428571 |
| DCPIA   | 0.04761904762 | 0.04761904762 | 0             | 0             | inf          | 4.7619E+31   |
| DCPIB   | 0.04761904762 | 0.04761904762 | 0.1666666667  | 0.1666666667  | 0.2          | 0.2857142857 |
| DCP2    | 0.04761904762 | 0.04761904762 | 0             | 0             | inf          | 4.7619E+31   |
| DCST1   | 0.1904761905  | 0.1904761905  | 0.1111111111  | 0.1111111111  | 1.529411765  | 1.714285714  |
| CST1-AS | 0.1904761905  | 0.1904761905  | 0.1111111111  | 0.1111111111  | 1.529411765  | 1.714285714  |
| DCST2   | 0.1904761905  | 0.1904761905  | 0.1111111111  | 0.1111111111  | 1.529411765  | 1.714285714  |
| CSTAM   | 0.1904761905  | 0.1904761905  | 0.1111111111  | 0.1111111111  | 1.529411765  | 1.714285714  |
| DCTD    | 0             | 0             | 0.05555555556 | 0.05555555556 | 0            | 0            |
| DCTN1   | 0             | 0             | 0.05555555556 | 0.05555555556 | 0            | 0            |
| CTN1-AS | 0             | 0             | 0.05555555556 | 0.05555555556 | 0            | 0            |
| DCTN3   | 0.09523809524 | 0.09523809524 | 0.05555555556 | 0.05555555556 | 1.473684211  | 1.714285714  |
| DCTN5   | 0.04761904762 | 0.04761904762 | 0             | 0             | inf          | 4.7619E+31   |
| DCTN6   | 0.04761904762 | 0.04761904762 | 0.1111111111  | 0.1111111111  | 0.325        | 0.4285714286 |
| DCTPP1  | 0.04761904762 | 0.04761904762 | 0             | 0             | inf          | 4.7619E+31   |
| CUN1D   | 0.1904761905  | 0.1904761905  | 0.05555555556 | 0.05555555556 | 3.294117647  | 3.428571429  |
| CUN1D   | 0.04761904762 | 0.04761904762 | 0             | 0             | inf          | 4.7619E+31   |
| CUN1D   | 0.2380952381  | 0.2380952381  | 0.05555555556 | 0.05555555556 | 4.375        | 4.285714286  |
| DCXR    | 0.04761904762 | 0.04761904762 | 0             | 0             | inf          | 4.7619E+31   |
| CXR-D   | 0.04761904762 | 0.04761904762 | 0             | 0             | inf          | 4.7619E+31   |
| DDA1    | 0.1428571429  | 0.1428571429  | 0.1111111111  | 0.1111111111  | 1.083333333  | 1.285714286  |
| DDAH1   | 0.04761904762 | 0.04761904762 | 0.05555555556 | 0.05555555556 | 0.7          | 0.8571428571 |
| DDAH2   | 0.04761904762 | 0.04761904762 | 0             | 0             | inf          | 4.7619E+31   |
| DDB2    | 0             | 0             | 0.05555555556 | 0.05555555556 | 0            | 0            |
| DDC     | 0.1428571429  | 0.1428571429  | 0.2222222222  | 0.2222222222  | 0.4583333333 | 0.6428571429 |
| DDC-AS  | 0.1428571429  | 0.1428571429  | 0.2222222222  | 0.2222222222  | 0.4583333333 | 0.6428571429 |
| DDHD1   | 0.04761904762 | 0.04761904762 | 0             | 0             | inf          | 4.7619E+31   |
| DDHD2   | 0.09523809524 | 0.09523809524 | 0.1111111111  | 0.1111111111  | 0.6842105263 | 0.8571428571 |
| DDI2    | 0.04761904762 | 0.04761904762 | 0.1111111111  | 0.1111111111  | 0.325        | 0.4285714286 |
| DDIT4   | 0.1904761905  | 0.1904761905  | 0.05555555556 | 0.05555555556 | 3.294117647  | 3.428571429  |
| DDIT4L  | 0             | 0             | 0.05555555556 | 0.05555555556 | 0            | 0            |
| DDN     | 0.04761904762 | 0.04761904762 | 0.05555555556 | 0.05555555556 | 0.7          | 0.8571428571 |
| DDN-AS  | 0.04761904762 | 0.04761904762 | 0.05555555556 | 0.05555555556 | 0.7          | 0.8571428571 |
| DDO     | 0             | 0             | 0             | 0             |              | 0.00001      |
| DDOST   | 0.04761904762 | 0.04761904762 | 0.1111111111  | 0.1111111111  | 0.325        | 0.4285714286 |
| DDR2    | 0.1428571429  | 0.1428571429  | 0             | 0             | inf          | 1.42857E+32  |
| DDR GK  | 0.1904761905  | 0.1904761905  | 0.05555555556 | 0.05555555556 | 3.294117647  | 3.428571429  |
| DDT     | 0.04761904762 | 0.04761904762 | 0.1111111111  | 0.1111111111  | 0.325        | 0.4285714286 |
| DDTL    | 0.04761904762 | 0.04761904762 | 0.1111111111  | 0.1111111111  | 0.325        | 0.4285714286 |
| DDX1    | 0             | 0             | 0.05555555556 | 0.05555555556 | 0            | 0            |
| DDX11   | 0.04761904762 | 0.04761904762 | 0.05555555556 | 0.05555555556 | 0.7          | 0.8571428571 |
| DX11-AS | 0.04761904762 | 0.04761904762 | 0.05555555556 | 0.05555555556 | 0.7          | 0.8571428571 |
| DDX11L  | 0.04761904762 | 0.04761904762 | 0.1666666667  | 0.1666666667  | 0.2          | 0.2857142857 |
| DX11L1  | 0.04761904762 | 0.04761904762 | 0.2222222222  | 0.2222222222  | 0.1375       | 0.2142857143 |
| DDX11L  | 0             | 0             | 0.05555555556 | 0.05555555556 | 0            | 0            |
| DDX11L  | 0.04761904762 | 0.04761904762 | 0.05555555556 | 0.05555555556 | 0.7          | 0.8571428571 |
| DDX11L  | 0.04761904762 | 0.04761904762 | 0.05555555556 | 0.05555555556 | 0.7          | 0.8571428571 |
| DDX12P  | 0.04761904762 | 0.04761904762 | 0.1111111111  | 0.1111111111  | 0.325        | 0.4285714286 |
| DDX17   | 0.04761904762 | 0.04761904762 | 0.1111111111  | 0.1111111111  | 0.325        | 0.4285714286 |

|                 |               |               |               |               |              |              |
|-----------------|---------------|---------------|---------------|---------------|--------------|--------------|
| <b>DDX18</b>    | 0             | 0             | 0.05555555556 | 0.05555555556 | 0            | 0            |
| <b>DDX19A</b>   | 0.1428571429  | 0.1428571429  | 0.05555555556 | 0.05555555556 | 2.333333333  | 2.571428571  |
| <b>DDX19B</b>   | 0.1428571429  | 0.1428571429  | 0.05555555556 | 0.05555555556 | 2.333333333  | 2.571428571  |
| <b>DDX20</b>    | 0.04761904762 | 0.04761904762 | 0             | 0             | inf          | 4.7619E+31   |
| <b>DDX21</b>    | 0.1904761905  | 0.1904761905  | 0.05555555556 | 0.05555555556 | 3.294117647  | 3.428571429  |
| <b>DDX23</b>    | 0.04761904762 | 0.04761904762 | 0.05555555556 | 0.05555555556 | 0.7          | 0.8571428571 |
| <b>DDX27</b>    | 0.09523809524 | 0.09523809524 | 0.16666666667 | 0.16666666667 | 0.4210526316 | 0.5714285714 |
| <b>DDX28</b>    | 0.1428571429  | 0.1428571429  | 0.05555555556 | 0.05555555556 | 2.333333333  | 2.571428571  |
| <b>DDX31</b>    | 0.04761904762 | 0.04761904762 | 0             | 0             | inf          | 4.7619E+31   |
| <b>DDX39A</b>   | 0.1428571429  | 0.1428571429  | 0.11111111111 | 0.11111111111 | 1.083333333  | 1.285714286  |
| <b>DDX39B</b>   | 0.04761904762 | 0.04761904762 | 0             | 0             | inf          | 4.7619E+31   |
| <b>DDX39B-A</b> | 0.04761904762 | 0.04761904762 | 0             | 0             | inf          | 4.7619E+31   |
| <b>DDX4</b>     | 0.04761904762 | 0.04761904762 | 0.05555555556 | 0.05555555556 | 0.7          | 0.8571428571 |
| <b>DDX41</b>    | 0.09523809524 | 0.09523809524 | 0.05555555556 | 0.05555555556 | 1.473684211  | 1.714285714  |
| <b>DDX42</b>    | 0.04761904762 | 0.04761904762 | 0             | 0             | inf          | 4.7619E+31   |
| <b>DDX43</b>    | 0.04761904762 | 0.04761904762 | 0             | 0             | inf          | 4.7619E+31   |
| <b>DDX46</b>    | 0.04761904762 | 0.04761904762 | 0             | 0             | inf          | 4.7619E+31   |
| <b>DDX47</b>    | 0.04761904762 | 0.04761904762 | 0.05555555556 | 0.05555555556 | 0.7          | 0.8571428571 |
| <b>DDX49</b>    | 0.1428571429  | 0.1428571429  | 0.11111111111 | 0.11111111111 | 1.083333333  | 1.285714286  |
| <b>DDX5</b>     | 0.04761904762 | 0.04761904762 | 0             | 0             | inf          | 4.7619E+31   |
| <b>DDX50</b>    | 0.1904761905  | 0.1904761905  | 0.05555555556 | 0.05555555556 | 3.294117647  | 3.428571429  |
| <b>DDX51</b>    | 0.09523809524 | 0.09523809524 | 0.05555555556 | 0.05555555556 | 1.473684211  | 1.714285714  |
| <b>DDX54</b>    | 0             | 0             | 0.05555555556 | 0.05555555556 | 0            | 0            |
| <b>DDX55</b>    | 0.04761904762 | 0.04761904762 | 0.11111111111 | 0.11111111111 | 0.325        | 0.4285714286 |
| <b>DDX56</b>    | 0.04761904762 | 0.04761904762 | 0.22222222222 | 0.22222222222 | 0.1375       | 0.2142857143 |
| <b>DDX58</b>    | 0.09523809524 | 0.09523809524 | 0.05555555556 | 0.05555555556 | 1.473684211  | 1.714285714  |
| <b>DDX59</b>    | 0.1428571429  | 0.1428571429  | 0             | 0             | inf          | 1.42857E+32  |
| <b>DDX60</b>    | 0             | 0             | 0.05555555556 | 0.05555555556 | 0            | 0            |
| <b>DDX60L</b>   | 0             | 0             | 0.05555555556 | 0.05555555556 | 0            | 0            |
| <b>DEAF1</b>    | 0.04761904762 | 0.04761904762 | 0             | 0             | inf          | 4.7619E+31   |
| <b>DECR1</b>    | 0.1904761905  | 0.1904761905  | 0.11111111111 | 0.11111111111 | 1.529411765  | 1.714285714  |
| <b>DECR2</b>    | 0.04761904762 | 0.04761904762 | 0.22222222222 | 0.22222222222 | 0.1375       | 0.2142857143 |
| <b>DEDD</b>     | 0.1428571429  | 0.1428571429  | 0             | 0             | inf          | 1.42857E+32  |
| <b>DEDD2</b>    | 0.04761904762 | 0.04761904762 | 0.05555555556 | 0.05555555556 | 0.7          | 0.8571428571 |
| <b>DEF6</b>     | 0.04761904762 | 0.04761904762 | 0             | 0             | inf          | 4.7619E+31   |
| <b>DEF8</b>     | 0.09523809524 | 0.09523809524 | 0             | 0             | inf          | 9.52381E+31  |
| <b>DEFA1</b>    | 0.09523809524 | 0.09523809524 | 0.11111111111 | 0.11111111111 | 0.6842105263 | 0.8571428571 |
| <b>DEFA10</b>   | 0.09523809524 | 0.09523809524 | 0.11111111111 | 0.11111111111 | 0.6842105263 | 0.8571428571 |
| <b>DEFA11</b>   | 0.09523809524 | 0.09523809524 | 0.11111111111 | 0.11111111111 | 0.6842105263 | 0.8571428571 |
| <b>DEFA1B</b>   | 0.09523809524 | 0.09523809524 | 0.11111111111 | 0.11111111111 | 0.6842105263 | 0.8571428571 |
| <b>DEFA3</b>    | 0.09523809524 | 0.09523809524 | 0.11111111111 | 0.11111111111 | 0.6842105263 | 0.8571428571 |
| <b>DEFA4</b>    | 0.09523809524 | 0.09523809524 | 0.11111111111 | 0.11111111111 | 0.6842105263 | 0.8571428571 |
| <b>DEFA5</b>    | 0.09523809524 | 0.09523809524 | 0.11111111111 | 0.11111111111 | 0.6842105263 | 0.8571428571 |
| <b>DEFA6</b>    | 0.09523809524 | 0.09523809524 | 0.11111111111 | 0.11111111111 | 0.6842105263 | 0.8571428571 |
| <b>DEFA8P</b>   | 0.09523809524 | 0.09523809524 | 0.11111111111 | 0.11111111111 | 0.6842105263 | 0.8571428571 |
| <b>DEFA9P</b>   | 0.09523809524 | 0.09523809524 | 0.11111111111 | 0.11111111111 | 0.6842105263 | 0.8571428571 |
| <b>DEFB1</b>    | 0.09523809524 | 0.09523809524 | 0.11111111111 | 0.11111111111 | 0.6842105263 | 0.8571428571 |
| <b>EFB103</b>   | 0.09523809524 | 0.09523809524 | 0.22222222222 | 0.22222222222 | 0.2894736842 | 0.4285714286 |
| <b>EFB103</b>   | 0.09523809524 | 0.09523809524 | 0.22222222222 | 0.22222222222 | 0.2894736842 | 0.4285714286 |
| <b>EFB104</b>   | 0.09523809524 | 0.09523809524 | 0.22222222222 | 0.22222222222 | 0.2894736842 | 0.4285714286 |
| <b>EFB104</b>   | 0.09523809524 | 0.09523809524 | 0.22222222222 | 0.22222222222 | 0.2894736842 | 0.4285714286 |



|        |               |               |               |               |              |              |
|--------|---------------|---------------|---------------|---------------|--------------|--------------|
| ENND6  | 0.09523809524 | 0.09523809524 | 0             | 0             | inf          | 9.52381E+31  |
| NND6A  | 0.09523809524 | 0.09523809524 | 0             | 0             | inf          | 9.52381E+31  |
| ENND6  | 0             | 0             | 0.1111111111  | 0.1111111111  | 0            | 0            |
| DENR   | 0.04761904762 | 0.04761904762 | 0.1111111111  | 0.1111111111  | 0.325        | 0.4285714286 |
| DEPDC1 | 0.04761904762 | 0.04761904762 | 0.05555555556 | 0.05555555556 | 0.7          | 0.8571428571 |
| PDC1-A | 0.04761904762 | 0.04761904762 | 0.05555555556 | 0.05555555556 | 0.7          | 0.8571428571 |
| EPDC10 | 0.04761904762 | 0.04761904762 | 0             | 0             | inf          | 4.7619E+31   |
| DEPDC4 | 0.04761904762 | 0.04761904762 | 0.05555555556 | 0.05555555556 | 0.7          | 0.8571428571 |
| DEPDC5 | 0.04761904762 | 0.04761904762 | 0.1111111111  | 0.1111111111  | 0.325        | 0.4285714286 |
| DEPDC7 | 0.04761904762 | 0.04761904762 | 0             | 0             | inf          | 4.7619E+31   |
| DEPP1  | 0.1428571429  | 0.1428571429  | 0.05555555556 | 0.05555555556 | 2.333333333  | 2.571428571  |
| DEPTOR | 0.09523809524 | 0.09523809524 | 0.1666666667  | 0.1666666667  | 0.4210526316 | 0.5714285714 |
| DERA   | 0.04761904762 | 0.04761904762 | 0.1111111111  | 0.1111111111  | 0.325        | 0.4285714286 |
| DERL1  | 0.1428571429  | 0.1428571429  | 0.1111111111  | 0.1111111111  | 1.083333333  | 1.285714286  |
| DERL2  | 0             | 0             | 0.05555555556 | 0.05555555556 | 0            | 0            |
| DERL3  | 0.04761904762 | 0.04761904762 | 0.1111111111  | 0.1111111111  | 0.325        | 0.4285714286 |
| DERPC  | 0.1428571429  | 0.1428571429  | 0.05555555556 | 0.05555555556 | 2.333333333  | 2.571428571  |
| DES    | 0             | 0             | 0.05555555556 | 0.05555555556 | 0            | 0            |
| DESI1  | 0             | 0             | 0.1111111111  | 0.1111111111  | 0            | 0            |
| DESI2  | 0.1428571429  | 0.1428571429  | 0.05555555556 | 0.05555555556 | 2.333333333  | 2.571428571  |
| DET1   | 0.04761904762 | 0.04761904762 | 0.05555555556 | 0.05555555556 | 0.7          | 0.8571428571 |
| DEXI   | 0.04761904762 | 0.04761904762 | 0             | 0             | inf          | 4.7619E+31   |
| DFFA   | 0.04761904762 | 0.04761904762 | 0.1111111111  | 0.1111111111  | 0.325        | 0.4285714286 |
| DFFB   | 0             | 0             | 0             | 0             |              | 0.00001      |
| DGAT1  | 0.04761904762 | 0.04761904762 | 0.1666666667  | 0.1666666667  | 0.2          | 0.2857142857 |
| DGCR10 | 0.04761904762 | 0.04761904762 | 0.05555555556 | 0.05555555556 | 0.7          | 0.8571428571 |
| DGCR11 | 0.04761904762 | 0.04761904762 | 0.05555555556 | 0.05555555556 | 0.7          | 0.8571428571 |
| DGCR2  | 0.04761904762 | 0.04761904762 | 0.05555555556 | 0.05555555556 | 0.7          | 0.8571428571 |
| DGCR5  | 0.04761904762 | 0.04761904762 | 0.05555555556 | 0.05555555556 | 0.7          | 0.8571428571 |
| DGCR6  | 0.04761904762 | 0.04761904762 | 0.05555555556 | 0.05555555556 | 0.7          | 0.8571428571 |
| DGCR61 | 0.04761904762 | 0.04761904762 | 0.05555555556 | 0.05555555556 | 0.7          | 0.8571428571 |
| DGCR8  | 0.04761904762 | 0.04761904762 | 0.05555555556 | 0.05555555556 | 0.7          | 0.8571428571 |
| DGCR9  | 0.04761904762 | 0.04761904762 | 0.05555555556 | 0.05555555556 | 0.7          | 0.8571428571 |
| DGKA   | 0.04761904762 | 0.04761904762 | 0.05555555556 | 0.05555555556 | 0.7          | 0.8571428571 |
| DGKB   | 0.04761904762 | 0.04761904762 | 0.2222222222  | 0.2222222222  | 0.1375       | 0.2142857143 |
| DGKD   | 0             | 0             | 0.05555555556 | 0.05555555556 | 0            | 0            |
| DGKE   | 0.09523809524 | 0.09523809524 | 0             | 0             | inf          | 9.52381E+31  |
| DGKG   | 0.09523809524 | 0.09523809524 | 0.05555555556 | 0.05555555556 | 1.473684211  | 1.714285714  |
| DGKI   | 0.04761904762 | 0.04761904762 | 0.05555555556 | 0.05555555556 | 0.7          | 0.8571428571 |
| DGKQ   | 0.04761904762 | 0.04761904762 | 0             | 0             | inf          | 4.7619E+31   |
| DGKZ   | 0             | 0             | 0.05555555556 | 0.05555555556 | 0            | 0            |
| DGUOK  | 0             | 0             | 0.05555555556 | 0.05555555556 | 0            | 0            |
| GUOK-A | 0             | 0             | 0.05555555556 | 0.05555555556 | 0            | 0            |
| DHCR24 | 0.04761904762 | 0.04761904762 | 0.05555555556 | 0.05555555556 | 0.7          | 0.8571428571 |
| DHDDS  | 0.04761904762 | 0.04761904762 | 0.1111111111  | 0.1111111111  | 0.325        | 0.4285714286 |
| DHDH   | 0.09523809524 | 0.09523809524 | 0.1111111111  | 0.1111111111  | 0.6842105263 | 0.8571428571 |
| DHFR   | 0.04761904762 | 0.04761904762 | 0             | 0             | inf          | 4.7619E+31   |
| DHFR2  | 0.04761904762 | 0.04761904762 | 0.05555555556 | 0.05555555556 | 0.7          | 0.8571428571 |
| DHFRP3 | 0             | 0             | 0.05555555556 | 0.05555555556 | 0            | 0            |
| DHH    | 0.04761904762 | 0.04761904762 | 0.05555555556 | 0.05555555556 | 0.7          | 0.8571428571 |
| DHODH  | 0.04761904762 | 0.04761904762 | 0             | 0             | inf          | 4.7619E+31   |

|         |               |               |               |               |              |              |
|---------|---------------|---------------|---------------|---------------|--------------|--------------|
| DHPS    | 0.1428571429  | 0.1428571429  | 0.1111111111  | 0.1111111111  | 1.083333333  | 1.285714286  |
| DHRS11  | 0.04761904762 | 0.04761904762 | 0             | 0             | inf          | 4.7619E+31   |
| DHRS13  | 0.04761904762 | 0.04761904762 | 0.05555555556 | 0.05555555556 | 0.7          | 0.8571428571 |
| DHRS3   | 0.04761904762 | 0.04761904762 | 0.1111111111  | 0.1111111111  | 0.325        | 0.4285714286 |
| DHRS7B  | 0.09523809524 | 0.09523809524 | 0.05555555556 | 0.05555555556 | 1.473684211  | 1.714285714  |
| DHRS7C  | 0.04761904762 | 0.04761904762 | 0.05555555556 | 0.05555555556 | 0.7          | 0.8571428571 |
| DHRS9   | 0.04761904762 | 0.04761904762 | 0.05555555556 | 0.05555555556 | 0.7          | 0.8571428571 |
| DHTKD1  | 0.09523809524 | 0.09523809524 | 0.1111111111  | 0.1111111111  | 0.6842105263 | 0.8571428571 |
| DHX29   | 0.04761904762 | 0.04761904762 | 0.05555555556 | 0.05555555556 | 0.7          | 0.8571428571 |
| DHX30   | 0.09523809524 | 0.09523809524 | 0             | 0             | inf          | 9.52381E+31  |
| DHX32   | 0.2380952381  | 0.2380952381  | 0.05555555556 | 0.05555555556 | 4.375        | 4.285714286  |
| DHX33   | 0             | 0             | 0.05555555556 | 0.05555555556 | 0            | 0            |
| DHX34   | 0.09523809524 | 0.09523809524 | 0.1111111111  | 0.1111111111  | 0.6842105263 | 0.8571428571 |
| DHX35   | 0.1428571429  | 0.1428571429  | 0.2222222222  | 0.2222222222  | 0.4583333333 | 0.6428571429 |
| DHX36   | 0.1904761905  | 0.1904761905  | 0.05555555556 | 0.05555555556 | 3.294117647  | 3.428571429  |
| DHX37   | 0.04761904762 | 0.04761904762 | 0.05555555556 | 0.05555555556 | 0.7          | 0.8571428571 |
| DHX38   | 0.04761904762 | 0.04761904762 | 0             | 0             | inf          | 4.7619E+31   |
| DHX40   | 0.1428571429  | 0.1428571429  | 0             | 0             | inf          | 1.42857E+32  |
| DHX57   | 0             | 0             | 0.05555555556 | 0.05555555556 | 0            | 0            |
| DHX58   | 0.04761904762 | 0.04761904762 | 0             | 0             | inf          | 4.7619E+31   |
| DHX8    | 0.04761904762 | 0.04761904762 | 0             | 0             | inf          | 4.7619E+31   |
| DHX9    | 0.1428571429  | 0.1428571429  | 0             | 0             | inf          | 1.42857E+32  |
| DIABLO  | 0.04761904762 | 0.04761904762 | 0.1111111111  | 0.1111111111  | 0.325        | 0.4285714286 |
| DIAPH1  | 0.04761904762 | 0.04761904762 | 0             | 0             | inf          | 4.7619E+31   |
| DIDO1   | 0.1428571429  | 0.1428571429  | 0.2222222222  | 0.2222222222  | 0.4583333333 | 0.6428571429 |
| DIMT1   | 0.04761904762 | 0.04761904762 | 0             | 0             | inf          | 4.7619E+31   |
| DINOL   | 0.04761904762 | 0.04761904762 | 0.05555555556 | 0.05555555556 | 0.7          | 0.8571428571 |
| DIO1    | 0.04761904762 | 0.04761904762 | 0.05555555556 | 0.05555555556 | 0.7          | 0.8571428571 |
| DIP2A   | 0.04761904762 | 0.04761904762 | 0.1111111111  | 0.1111111111  | 0.325        | 0.4285714286 |
| IP2A-IT | 0.04761904762 | 0.04761904762 | 0.1111111111  | 0.1111111111  | 0.325        | 0.4285714286 |
| DIP2B   | 0.09523809524 | 0.09523809524 | 0.05555555556 | 0.05555555556 | 1.473684211  | 1.714285714  |
| DIP2C   | 0.04761904762 | 0.04761904762 | 0.1111111111  | 0.1111111111  | 0.325        | 0.4285714286 |
| DIPK1A  | 0.04761904762 | 0.04761904762 | 0.05555555556 | 0.05555555556 | 0.7          | 0.8571428571 |
| DIPK1B  | 0.1428571429  | 0.1428571429  | 0.05555555556 | 0.05555555556 | 2.333333333  | 2.571428571  |
| DIPK2A  | 0.1428571429  | 0.1428571429  | 0.1111111111  | 0.1111111111  | 1.083333333  | 1.285714286  |
| DIRAS1  | 0.09523809524 | 0.09523809524 | 0.05555555556 | 0.05555555556 | 1.473684211  | 1.714285714  |
| DIRAS2  | 0.04761904762 | 0.04761904762 | 0.05555555556 | 0.05555555556 | 0.7          | 0.8571428571 |
| DIRAS3  | 0.04761904762 | 0.04761904762 | 0.05555555556 | 0.05555555556 | 0.7          | 0.8571428571 |
| DIRC1   | 0             | 0             | 0.1666666667  | 0.1666666667  | 0            | 0            |
| DIRC3   | 0             | 0             | 0.1111111111  | 0.1111111111  | 0            | 0            |
| IRC3-AS | 0             | 0             | 0.1111111111  | 0.1111111111  | 0            | 0            |
| DIS3L   | 0.04761904762 | 0.04761904762 | 0.05555555556 | 0.05555555556 | 0.7          | 0.8571428571 |
| DIS3L2  | 0             | 0             | 0.05555555556 | 0.05555555556 | 0            | 0            |
| DISC1   | 0.1428571429  | 0.1428571429  | 0             | 0             | inf          | 1.42857E+32  |
| ISC1-IT | 0.1428571429  | 0.1428571429  | 0             | 0             | inf          | 1.42857E+32  |
| DISC2   | 0.1428571429  | 0.1428571429  | 0             | 0             | inf          | 1.42857E+32  |
| DISP1   | 0.1428571429  | 0.1428571429  | 0.05555555556 | 0.05555555556 | 2.333333333  | 2.571428571  |
| DISP3   | 0.04761904762 | 0.04761904762 | 0.1111111111  | 0.1111111111  | 0.325        | 0.4285714286 |
| ZP434A  | 0.1428571429  | 0.1428571429  | 0.05555555556 | 0.05555555556 | 2.333333333  | 2.571428571  |
| ZP434E  | 0.04761904762 | 0.04761904762 | 0             | 0             | inf          | 4.7619E+31   |
| ZP586I  | 0.04761904762 | 0.04761904762 | 0.1666666667  | 0.1666666667  | 0.2          | 0.2857142857 |



|         |               |               |              |              |              |              |
|---------|---------------|---------------|--------------|--------------|--------------|--------------|
| FZp434I | 0.1428571429  | 0.1428571429  | 0.1666666667 | 0.1666666667 | 0.6666666667 | 0.8571428571 |
| FZp451B | 0             | 0             | 0.1111111111 | 0.1111111111 | 0            | 0            |
| DKK1    | 0.04761904762 | 0.04761904762 | 0.0555555556 | 0.0555555556 | 0.7          | 0.8571428571 |
| DKK2    | 0             | 0             | 0.0555555556 | 0.0555555556 | 0            | 0            |
| DKK4    | 0.09523809524 | 0.09523809524 | 0.1666666667 | 0.1666666667 | 0.4210526316 | 0.5714285714 |
| DKKL1   | 0.09523809524 | 0.09523809524 | 0.1111111111 | 0.1111111111 | 0.6842105263 | 0.8571428571 |
| DLC1    | 0.09523809524 | 0.09523809524 | 0.1111111111 | 0.1111111111 | 0.6842105263 | 0.8571428571 |
| DLD     | 0.04761904762 | 0.04761904762 | 0.0555555556 | 0.0555555556 | 0.7          | 0.8571428571 |
| DLEC1   | 0.04761904762 | 0.04761904762 | 0            | 0            | inf          | 4.7619E+31   |
| DLEU2I  | 0.04761904762 | 0.04761904762 | 0.0555555556 | 0.0555555556 | 0.7          | 0.8571428571 |
| DLG1    | 0.1428571429  | 0.1428571429  | 0.0555555556 | 0.0555555556 | 2.333333333  | 2.571428571  |
| LG1-AS  | 0.1428571429  | 0.1428571429  | 0.0555555556 | 0.0555555556 | 2.333333333  | 2.571428571  |
| DLG4    | 0             | 0             | 0.0555555556 | 0.0555555556 | 0            | 0            |
| DLG5    | 0.1428571429  | 0.1428571429  | 0.0555555556 | 0.0555555556 | 2.333333333  | 2.571428571  |
| LG5-AS  | 0.1428571429  | 0.1428571429  | 0.0555555556 | 0.0555555556 | 2.333333333  | 2.571428571  |
| DLGAP1  | 0.09523809524 | 0.09523809524 | 0            | 0            | inf          | 9.52381E+31  |
| GAP1-A  | 0.09523809524 | 0.09523809524 | 0            | 0            | inf          | 9.52381E+31  |
| GAP1-A  | 0.09523809524 | 0.09523809524 | 0            | 0            | inf          | 9.52381E+31  |
| GAP1-A  | 0.09523809524 | 0.09523809524 | 0            | 0            | inf          | 9.52381E+31  |
| GAP1-A  | 0.09523809524 | 0.09523809524 | 0            | 0            | inf          | 9.52381E+31  |
| GAP1-A  | 0.09523809524 | 0.09523809524 | 0            | 0            | inf          | 9.52381E+31  |
| DLGAP2  | 0.1428571429  | 0.1428571429  | 0.1111111111 | 0.1111111111 | 1.083333333  | 1.285714286  |
| GAP2-A  | 0.1428571429  | 0.1428571429  | 0.1111111111 | 0.1111111111 | 1.083333333  | 1.285714286  |
| DLGAP3  | 0.04761904762 | 0.04761904762 | 0            | 0            | inf          | 4.7619E+31   |
| DLGAP4  | 0.09523809524 | 0.09523809524 | 0.1111111111 | 0.1111111111 | 0.6842105263 | 0.8571428571 |
| GAP4-A  | 0.09523809524 | 0.09523809524 | 0.1111111111 | 0.1111111111 | 0.6842105263 | 0.8571428571 |
| DLGAP5  | 0.04761904762 | 0.04761904762 | 0            | 0            | inf          | 4.7619E+31   |
| DLK2    | 0.04761904762 | 0.04761904762 | 0.0555555556 | 0.0555555556 | 0.7          | 0.8571428571 |
| DLL3    | 0.04761904762 | 0.04761904762 | 0.0555555556 | 0.0555555556 | 0.7          | 0.8571428571 |
| DLSTP1  | 0.04761904762 | 0.04761904762 | 0.0555555556 | 0.0555555556 | 0.7          | 0.8571428571 |
| DLX1    | 0             | 0             | 0.0555555556 | 0.0555555556 | 0            | 0            |
| DLX2    | 0             | 0             | 0.0555555556 | 0.0555555556 | 0            | 0            |
| DLX2-D  | 0             | 0             | 0.0555555556 | 0.0555555556 | 0            | 0            |
| DLX3    | 0.09523809524 | 0.09523809524 | 0            | 0            | inf          | 9.52381E+31  |
| DLX4    | 0.09523809524 | 0.09523809524 | 0            | 0            | inf          | 9.52381E+31  |
| DLX5    | 0.04761904762 | 0.04761904762 | 0.1111111111 | 0.1111111111 | 0.325        | 0.4285714286 |
| DLX6    | 0.04761904762 | 0.04761904762 | 0.1111111111 | 0.1111111111 | 0.325        | 0.4285714286 |
| LX6-AS  | 0.04761904762 | 0.04761904762 | 0.1111111111 | 0.1111111111 | 0.325        | 0.4285714286 |
| DM1-AS  | 0.09523809524 | 0.09523809524 | 0.1111111111 | 0.1111111111 | 0.6842105263 | 0.8571428571 |
| DMAC1   | 0.04761904762 | 0.04761904762 | 0.0555555556 | 0.0555555556 | 0.7          | 0.8571428571 |
| DMAC2   | 0.04761904762 | 0.04761904762 | 0.0555555556 | 0.0555555556 | 0.7          | 0.8571428571 |
| DMAC2I  | 0.04761904762 | 0.04761904762 | 0            | 0            | inf          | 4.7619E+31   |
| DMAPI   | 0.04761904762 | 0.04761904762 | 0.0555555556 | 0.0555555556 | 0.7          | 0.8571428571 |
| DMBT1   | 0.2380952381  | 0.2380952381  | 0.0555555556 | 0.0555555556 | 4.375        | 4.285714286  |
| MBT1P   | 0.2380952381  | 0.2380952381  | 0.0555555556 | 0.0555555556 | 4.375        | 4.285714286  |
| DMBX1   | 0.04761904762 | 0.04761904762 | 0.0555555556 | 0.0555555556 | 0.7          | 0.8571428571 |
| DMC1    | 0.04761904762 | 0.04761904762 | 0.1111111111 | 0.1111111111 | 0.325        | 0.4285714286 |
| DMGDH   | 0.04761904762 | 0.04761904762 | 0            | 0            | inf          | 4.7619E+31   |
| DMKN    | 0.04761904762 | 0.04761904762 | 0.0555555556 | 0.0555555556 | 0.7          | 0.8571428571 |
| DMP1    | 0             | 0             | 0.0555555556 | 0.0555555556 | 0            | 0            |
| DMPK    | 0.09523809524 | 0.09523809524 | 0.1111111111 | 0.1111111111 | 0.6842105263 | 0.8571428571 |

|          |               |               |               |               |              |              |
|----------|---------------|---------------|---------------|---------------|--------------|--------------|
| DMRT1    | 0.04761904762 | 0.04761904762 | 0.05555555556 | 0.05555555556 | 0.7          | 0.8571428571 |
| DMRT2    | 0.04761904762 | 0.04761904762 | 0.05555555556 | 0.05555555556 | 0.7          | 0.8571428571 |
| DMRT3    | 0.04761904762 | 0.04761904762 | 0.05555555556 | 0.05555555556 | 0.7          | 0.8571428571 |
| DMRTA    | 0.09523809524 | 0.09523809524 | 0.05555555556 | 0.05555555556 | 1.473684211  | 1.714285714  |
| DMRTA    | 0             | 0             | 0             | 0             |              | 0.00001      |
| DMRTB    | 0.04761904762 | 0.04761904762 | 0.05555555556 | 0.05555555556 | 0.7          | 0.8571428571 |
| DMRTC    | 0.04761904762 | 0.04761904762 | 0.05555555556 | 0.05555555556 | 0.7          | 0.8571428571 |
| DMTF1    | 0.09523809524 | 0.09523809524 | 0.05555555556 | 0.05555555556 | 1.473684211  | 1.714285714  |
| DMTN     | 0.09523809524 | 0.09523809524 | 0.11111111111 | 0.11111111111 | 0.6842105263 | 0.8571428571 |
| DMWD     | 0.09523809524 | 0.09523809524 | 0.11111111111 | 0.11111111111 | 0.6842105263 | 0.8571428571 |
| DMXL1    | 0.04761904762 | 0.04761904762 | 0             | 0             | inf          | 4.7619E+31   |
| DMXL2    | 0.04761904762 | 0.04761904762 | 0.05555555556 | 0.05555555556 | 0.7          | 0.8571428571 |
| DNA2     | 0.1904761905  | 0.1904761905  | 0.05555555556 | 0.05555555556 | 3.294117647  | 3.428571429  |
| DNAAF1   | 0.04761904762 | 0.04761904762 | 0             | 0             | inf          | 4.7619E+31   |
| DNAAF2   | 0.04761904762 | 0.04761904762 | 0             | 0             | inf          | 4.7619E+31   |
| DNAAF3   | 0.09523809524 | 0.09523809524 | 0.05555555556 | 0.05555555556 | 1.473684211  | 1.714285714  |
| DNAAF4   | 0.04761904762 | 0.04761904762 | 0.05555555556 | 0.05555555556 | 0.7          | 0.8571428571 |
| AF4-CC   | 0.04761904762 | 0.04761904762 | 0.05555555556 | 0.05555555556 | 0.7          | 0.8571428571 |
| DNAAF5   | 0.04761904762 | 0.04761904762 | 0.16666666667 | 0.16666666667 | 0.2          | 0.2857142857 |
| DNAH1    | 0.04761904762 | 0.04761904762 | 0             | 0             | inf          | 4.7619E+31   |
| DNAH10   | 0.04761904762 | 0.04761904762 | 0.05555555556 | 0.05555555556 | 0.7          | 0.8571428571 |
| DNAH11   | 0.04761904762 | 0.04761904762 | 0.16666666667 | 0.16666666667 | 0.2          | 0.2857142857 |
| DNAH12   | 0.09523809524 | 0.09523809524 | 0             | 0             | inf          | 9.52381E+31  |
| DNAH14   | 0.1428571429  | 0.1428571429  | 0.05555555556 | 0.05555555556 | 2.333333333  | 2.571428571  |
| DNAH17   | 0.04761904762 | 0.04761904762 | 0             | 0             | inf          | 4.7619E+31   |
| AH17-A   | 0.04761904762 | 0.04761904762 | 0             | 0             | inf          | 4.7619E+31   |
| DNAH2    | 0             | 0             | 0.05555555556 | 0.05555555556 | 0            | 0            |
| DNAH3    | 0.04761904762 | 0.04761904762 | 0             | 0             | inf          | 4.7619E+31   |
| DNAH5    | 0.04761904762 | 0.04761904762 | 0.05555555556 | 0.05555555556 | 0.7          | 0.8571428571 |
| DNAH6    | 0             | 0             | 0.05555555556 | 0.05555555556 | 0            | 0            |
| DNAH7    | 0             | 0             | 0.05555555556 | 0.05555555556 | 0            | 0            |
| DNAH8    | 0.04761904762 | 0.04761904762 | 0.05555555556 | 0.05555555556 | 0.7          | 0.8571428571 |
| DNAH9    | 0.04761904762 | 0.04761904762 | 0.05555555556 | 0.05555555556 | 0.7          | 0.8571428571 |
| DNAI1    | 0.09523809524 | 0.09523809524 | 0.05555555556 | 0.05555555556 | 1.473684211  | 1.714285714  |
| DNAI2    | 0.04761904762 | 0.04761904762 | 0             | 0             | inf          | 4.7619E+31   |
| DNAJA1   | 0.09523809524 | 0.09523809524 | 0.05555555556 | 0.05555555556 | 1.473684211  | 1.714285714  |
| NAJA1P   | 0.04761904762 | 0.04761904762 | 0.05555555556 | 0.05555555556 | 0.7          | 0.8571428571 |
| DNAJA2   | 0.04761904762 | 0.04761904762 | 0             | 0             | inf          | 4.7619E+31   |
| DNAJA3   | 0.04761904762 | 0.04761904762 | 0             | 0             | inf          | 4.7619E+31   |
| DNAJA4   | 0.04761904762 | 0.04761904762 | 0.05555555556 | 0.05555555556 | 0.7          | 0.8571428571 |
| DNAJB1   | 0.1428571429  | 0.1428571429  | 0.11111111111 | 0.11111111111 | 1.083333333  | 1.285714286  |
| DNAJB1   | 0.09523809524 | 0.09523809524 | 0.05555555556 | 0.05555555556 | 1.473684211  | 1.714285714  |
| DNAJB1   | 0.1904761905  | 0.1904761905  | 0.05555555556 | 0.05555555556 | 3.294117647  | 3.428571429  |
| DNAJB1   | 0             | 0             | 0.05555555556 | 0.05555555556 | 0            | 0            |
| DNAJB3   | 0             | 0             | 0.05555555556 | 0.05555555556 | 0            | 0            |
| DNAJB4   | 0.04761904762 | 0.04761904762 | 0.05555555556 | 0.05555555556 | 0.7          | 0.8571428571 |
| DNAJB5   | 0.09523809524 | 0.09523809524 | 0.05555555556 | 0.05555555556 | 1.473684211  | 1.714285714  |
| NAJB5-ID | 0.09523809524 | 0.09523809524 | 0.05555555556 | 0.05555555556 | 1.473684211  | 1.714285714  |
| DNAJB6   | 0.1428571429  | 0.1428571429  | 0.05555555556 | 0.05555555556 | 2.333333333  | 2.571428571  |
| DNAJB7   | 0             | 0             | 0.11111111111 | 0.11111111111 | 0            | 0            |
| DNAJB8   | 0.09523809524 | 0.09523809524 | 0.05555555556 | 0.05555555556 | 1.473684211  | 1.714285714  |

|               |               |               |               |               |              |              |
|---------------|---------------|---------------|---------------|---------------|--------------|--------------|
| <b>AJB8-A</b> | 0.09523809524 | 0.09523809524 | 0.05555555556 | 0.05555555556 | 1.473684211  | 1.714285714  |
| <b>DNAJB9</b> | 0.04761904762 | 0.04761904762 | 0.05555555556 | 0.05555555556 | 0.7          | 0.8571428571 |
| <b>DNAJC1</b> | 0.09523809524 | 0.09523809524 | 0.11111111111 | 0.11111111111 | 0.6842105263 | 0.8571428571 |
| <b>DNAJC1</b> | 0             | 0             | 0.05555555556 | 0.05555555556 | 0            | 0            |
| <b>DNAJC1</b> | 0             | 0             | 0.05555555556 | 0.05555555556 | 0            | 0            |
| <b>DNAJC1</b> | 0.1904761905  | 0.1904761905  | 0.05555555556 | 0.05555555556 | 3.294117647  | 3.428571429  |
| <b>DNAJC1</b> | 0.1428571429  | 0.1428571429  | 0.05555555556 | 0.05555555556 | 2.333333333  | 2.571428571  |
| <b>DNAJC1</b> | 0.04761904762 | 0.04761904762 | 0.05555555556 | 0.05555555556 | 0.7          | 0.8571428571 |
| <b>DNAJC1</b> | 0.04761904762 | 0.04761904762 | 0.11111111111 | 0.11111111111 | 0.325        | 0.4285714286 |
| <b>DNAJC1</b> | 0.04761904762 | 0.04761904762 | 0             | 0             | inf          | 4.7619E+31   |
| <b>DNAJC1</b> | 0.1904761905  | 0.1904761905  | 0.05555555556 | 0.05555555556 | 3.294117647  | 3.428571429  |
| <b>DNAJC2</b> | 0.04761904762 | 0.04761904762 | 0.05555555556 | 0.05555555556 | 0.7          | 0.8571428571 |
| <b>DNAJC2</b> | 0.04761904762 | 0.04761904762 | 0.05555555556 | 0.05555555556 | 0.7          | 0.8571428571 |
| <b>DNAJC2</b> | 0.04761904762 | 0.04761904762 | 0.05555555556 | 0.05555555556 | 0.7          | 0.8571428571 |
| <b>DNAJC2</b> | 0.04761904762 | 0.04761904762 | 0.05555555556 | 0.05555555556 | 0.7          | 0.8571428571 |
| <b>JC25-G</b> | 0.04761904762 | 0.04761904762 | 0.05555555556 | 0.05555555556 | 0.7          | 0.8571428571 |
| <b>DNAJC2</b> | 0.04761904762 | 0.04761904762 | 0.11111111111 | 0.11111111111 | 0.325        | 0.4285714286 |
| <b>DNAJC3</b> | 0.1428571429  | 0.1428571429  | 0.11111111111 | 0.11111111111 | 1.083333333  | 1.285714286  |
| <b>DNAJC5</b> | 0.1428571429  | 0.1428571429  | 0.22222222222 | 0.22222222222 | 0.4583333333 | 0.6428571429 |
| <b>NAJC5</b>  | 0.1428571429  | 0.1428571429  | 0.16666666667 | 0.16666666667 | 0.6666666667 | 0.8571428571 |
| <b>DNAJC6</b> | 0.04761904762 | 0.04761904762 | 0.05555555556 | 0.05555555556 | 0.7          | 0.8571428571 |
| <b>DNAJC7</b> | 0.09523809524 | 0.09523809524 | 0             | 0             | inf          | 9.52381E+31  |
| <b>DNAJC8</b> | 0.04761904762 | 0.04761904762 | 0.11111111111 | 0.11111111111 | 0.325        | 0.4285714286 |
| <b>DNAJC9</b> | 0.1904761905  | 0.1904761905  | 0.05555555556 | 0.05555555556 | 3.294117647  | 3.428571429  |
| <b>AJC9-A</b> | 0.1904761905  | 0.1904761905  | 0.05555555556 | 0.05555555556 | 3.294117647  | 3.428571429  |
| <b>DNAL1</b>  | 0.09523809524 | 0.09523809524 | 0             | 0             | inf          | 9.52381E+31  |
| <b>DNAL4</b>  | 0.04761904762 | 0.04761904762 | 0.11111111111 | 0.11111111111 | 0.325        | 0.4285714286 |
| <b>DNALI1</b> | 0.04761904762 | 0.04761904762 | 0.05555555556 | 0.05555555556 | 0.7          | 0.8571428571 |
| <b>DNASE1</b> | 0.04761904762 | 0.04761904762 | 0.11111111111 | 0.11111111111 | 0.325        | 0.4285714286 |
| <b>NASE11</b> | 0.09523809524 | 0.09523809524 | 0.22222222222 | 0.22222222222 | 0.2894736842 | 0.4285714286 |
| <b>NASE11</b> | 0.04761904762 | 0.04761904762 | 0             | 0             | inf          | 4.7619E+31   |
| <b>DNASE2</b> | 0.1428571429  | 0.1428571429  | 0.11111111111 | 0.11111111111 | 1.083333333  | 1.285714286  |
| <b>NASE21</b> | 0.04761904762 | 0.04761904762 | 0.05555555556 | 0.05555555556 | 0.7          | 0.8571428571 |
| <b>DND1</b>   | 0.04761904762 | 0.04761904762 | 0             | 0             | inf          | 4.7619E+31   |
| <b>DNER</b>   | 0             | 0             | 0.05555555556 | 0.05555555556 | 0            | 0            |
| <b>DNHD1</b>  | 0.04761904762 | 0.04761904762 | 0             | 0             | inf          | 4.7619E+31   |
| <b>DNLZ</b>   | 0.1428571429  | 0.1428571429  | 0.05555555556 | 0.05555555556 | 2.333333333  | 2.571428571  |
| <b>DNM1</b>   | 0.09523809524 | 0.09523809524 | 0.05555555556 | 0.05555555556 | 1.473684211  | 1.714285714  |
| <b>DNM1L</b>  | 0.1428571429  | 0.1428571429  | 0.11111111111 | 0.11111111111 | 1.083333333  | 1.285714286  |
| <b>DNM1P3</b> | 0.04761904762 | 0.04761904762 | 0.05555555556 | 0.05555555556 | 0.7          | 0.8571428571 |
| <b>DNM1P4</b> | 0.04761904762 | 0.04761904762 | 0.05555555556 | 0.05555555556 | 0.7          | 0.8571428571 |
| <b>DNM1P4</b> | 0.04761904762 | 0.04761904762 | 0.05555555556 | 0.05555555556 | 0.7          | 0.8571428571 |
| <b>DNM2</b>   | 0.1428571429  | 0.1428571429  | 0.11111111111 | 0.11111111111 | 1.083333333  | 1.285714286  |
| <b>DNM3</b>   | 0.1428571429  | 0.1428571429  | 0.05555555556 | 0.05555555556 | 2.333333333  | 2.571428571  |
| <b>NM3-IT</b> | 0.1428571429  | 0.1428571429  | 0.05555555556 | 0.05555555556 | 2.333333333  | 2.571428571  |
| <b>DNM3OS</b> | 0.1428571429  | 0.1428571429  | 0.05555555556 | 0.05555555556 | 2.333333333  | 2.571428571  |
| <b>DNMBP</b>  | 0.1428571429  | 0.1428571429  | 0             | 0             | inf          | 1.42857E+32  |
| <b>NMBP-A</b> | 0.1428571429  | 0.1428571429  | 0             | 0             | inf          | 1.42857E+32  |
| <b>DNMT1</b>  | 0.1428571429  | 0.1428571429  | 0.11111111111 | 0.11111111111 | 1.083333333  | 1.285714286  |
| <b>DNMT3E</b> | 0.09523809524 | 0.09523809524 | 0.11111111111 | 0.11111111111 | 0.6842105263 | 0.8571428571 |
| <b>DNMT3I</b> | 0.04761904762 | 0.04761904762 | 0.11111111111 | 0.11111111111 | 0.325        | 0.4285714286 |

|         |               |               |               |               |               |              |
|---------|---------------|---------------|---------------|---------------|---------------|--------------|
| DNPEP   | 0             | 0             | 0.05555555556 | 0.05555555556 | 0             | 0            |
| DNP1    | 0.04761904762 | 0.04761904762 | 0.05555555556 | 0.05555555556 | 0.7           | 0.8571428571 |
| DNTT    | 0.1428571429  | 0.1428571429  | 0             | 0             | inf           | 1.42857E+32  |
| DNTTIP1 | 0.1428571429  | 0.1428571429  | 0.16666666667 | 0.16666666667 | 0.66666666667 | 0.8571428571 |
| DNTTIP2 | 0.04761904762 | 0.04761904762 | 0.05555555556 | 0.05555555556 | 0.7           | 0.8571428571 |
| DOC2A   | 0.04761904762 | 0.04761904762 | 0             | 0             | inf           | 4.7619E+31   |
| DOCK1   | 0.2380952381  | 0.2380952381  | 0.05555555556 | 0.05555555556 | 4.375         | 4.285714286  |
| DOCK10  | 0             | 0             | 0.05555555556 | 0.05555555556 | 0             | 0            |
| DOCK2   | 0             | 0             | 0.05555555556 | 0.05555555556 | 0             | 0            |
| DOCK3   | 0.09523809524 | 0.09523809524 | 0             | 0             | inf           | 9.52381E+31  |
| DOCK4   | 0.04761904762 | 0.04761904762 | 0.05555555556 | 0.05555555556 | 0.7           | 0.8571428571 |
| DOCK4-A | 0.04761904762 | 0.04761904762 | 0.05555555556 | 0.05555555556 | 0.7           | 0.8571428571 |
| DOCK5   | 0.04761904762 | 0.04761904762 | 0.11111111111 | 0.11111111111 | 0.325         | 0.4285714286 |
| DOCK6   | 0.1428571429  | 0.1428571429  | 0.11111111111 | 0.11111111111 | 1.083333333   | 1.285714286  |
| DOCK7   | 0.04761904762 | 0.04761904762 | 0.05555555556 | 0.05555555556 | 0.7           | 0.8571428571 |
| DOCK8   | 0.04761904762 | 0.04761904762 | 0.05555555556 | 0.05555555556 | 0.7           | 0.8571428571 |
| DOHH    | 0.09523809524 | 0.09523809524 | 0.05555555556 | 0.05555555556 | 1.473684211   | 1.714285714  |
| DOK1    | 0             | 0             | 0.05555555556 | 0.05555555556 | 0             | 0            |
| DOK2    | 0.09523809524 | 0.09523809524 | 0.11111111111 | 0.11111111111 | 0.6842105263  | 0.8571428571 |
| DOK3    | 0.09523809524 | 0.09523809524 | 0.05555555556 | 0.05555555556 | 1.473684211   | 1.714285714  |
| DOK4    | 0.04761904762 | 0.04761904762 | 0             | 0             | inf           | 4.7619E+31   |
| DOK5    | 0.09523809524 | 0.09523809524 | 0.11111111111 | 0.11111111111 | 0.6842105263  | 0.8571428571 |
| DOK7    | 0.04761904762 | 0.04761904762 | 0             | 0             | inf           | 4.7619E+31   |
| DOSON   | 0.04761904762 | 0.04761904762 | 0.11111111111 | 0.11111111111 | 0.325         | 0.4285714286 |
| DOP1B   | 0.04761904762 | 0.04761904762 | 0.16666666667 | 0.16666666667 | 0.2           | 0.2857142857 |
| DOT1L   | 0.09523809524 | 0.09523809524 | 0.11111111111 | 0.11111111111 | 0.6842105263  | 0.8571428571 |
| DPCD    | 0.1428571429  | 0.1428571429  | 0             | 0             | inf           | 1.42857E+32  |
| DPEP1   | 0.09523809524 | 0.09523809524 | 0             | 0             | inf           | 9.52381E+31  |
| DPEP2   | 0.1428571429  | 0.1428571429  | 0.05555555556 | 0.05555555556 | 2.333333333   | 2.571428571  |
| DPEP2N1 | 0.1428571429  | 0.1428571429  | 0.05555555556 | 0.05555555556 | 2.333333333   | 2.571428571  |
| DPEP3   | 0.1428571429  | 0.1428571429  | 0.05555555556 | 0.05555555556 | 2.333333333   | 2.571428571  |
| DPF1    | 0.04761904762 | 0.04761904762 | 0.05555555556 | 0.05555555556 | 0.7           | 0.8571428571 |
| DPF3    | 0.04761904762 | 0.04761904762 | 0             | 0             | inf           | 4.7619E+31   |
| DPH1    | 0             | 0             | 0.11111111111 | 0.11111111111 | 0             | 0            |
| DPH2    | 0.04761904762 | 0.04761904762 | 0.05555555556 | 0.05555555556 | 0.7           | 0.8571428571 |
| DPH3    | 0.04761904762 | 0.04761904762 | 0             | 0             | inf           | 4.7619E+31   |
| DPH3P1  | 0.1428571429  | 0.1428571429  | 0.22222222222 | 0.22222222222 | 0.4583333333  | 0.6428571429 |
| DPH5    | 0.04761904762 | 0.04761904762 | 0.05555555556 | 0.05555555556 | 0.7           | 0.8571428571 |
| DPH6    | 0             | 0             | 0.05555555556 | 0.05555555556 | 0             | 0            |
| DPH6-D1 | 0             | 0             | 0.05555555556 | 0.05555555556 | 0             | 0            |
| DPH7    | 0.09523809524 | 0.09523809524 | 0             | 0             | inf           | 9.52381E+31  |
| DPM1    | 0.09523809524 | 0.09523809524 | 0.16666666667 | 0.16666666667 | 0.4210526316  | 0.5714285714 |
| DPM2    | 0.09523809524 | 0.09523809524 | 0.05555555556 | 0.05555555556 | 1.473684211   | 1.714285714  |
| DPM3    | 0.1904761905  | 0.1904761905  | 0.11111111111 | 0.11111111111 | 1.529411765   | 1.714285714  |
| DPP10   | 0             | 0             | 0.05555555556 | 0.05555555556 | 0             | 0            |
| PP10-AS | 0             | 0             | 0.05555555556 | 0.05555555556 | 0             | 0            |
| PP10-AS | 0             | 0             | 0.05555555556 | 0.05555555556 | 0             | 0            |
| DPP4    | 0             | 0             | 0.05555555556 | 0.05555555556 | 0             | 0            |
| DPP6    | 0.1428571429  | 0.1428571429  | 0.05555555556 | 0.05555555556 | 2.333333333   | 2.571428571  |
| DPP7    | 0.1428571429  | 0.1428571429  | 0.05555555556 | 0.05555555556 | 2.333333333   | 2.571428571  |
| DPP8    | 0.04761904762 | 0.04761904762 | 0.05555555556 | 0.05555555556 | 0.7           | 0.8571428571 |

|               |               |               |               |               |              |              |
|---------------|---------------|---------------|---------------|---------------|--------------|--------------|
| <b>DPP9</b>   | 0.09523809524 | 0.09523809524 | 0.05555555556 | 0.05555555556 | 1.473684211  | 1.714285714  |
| <b>PP9-AS</b> | 0.09523809524 | 0.09523809524 | 0.05555555556 | 0.05555555556 | 1.473684211  | 1.714285714  |
| <b>DPPA2</b>  | 0.1428571429  | 0.1428571429  | 0.05555555556 | 0.05555555556 | 2.333333333  | 2.571428571  |
| <b>DPPA2P</b> | 0.09523809524 | 0.09523809524 | 0.05555555556 | 0.05555555556 | 1.473684211  | 1.714285714  |
| <b>DPPA3</b>  | 0.04761904762 | 0.04761904762 | 0.1111111111  | 0.1111111111  | 0.325        | 0.4285714286 |
| <b>DPPA4</b>  | 0.1428571429  | 0.1428571429  | 0.05555555556 | 0.05555555556 | 2.333333333  | 2.571428571  |
| <b>DPPA5</b>  | 0.04761904762 | 0.04761904762 | 0             | 0             | inf          | 4.7619E+31   |
| <b>DPRX</b>   | 0.09523809524 | 0.09523809524 | 0.05555555556 | 0.05555555556 | 1.473684211  | 1.714285714  |
| <b>DPRXP4</b> | 0             | 0             | 0             | 0             |              | 0.00001      |
| <b>DPT</b>    | 0.1428571429  | 0.1428571429  | 0             | 0             | inf          | 1.42857E+32  |
| <b>DPY19L</b> | 0.04761904762 | 0.04761904762 | 0.2222222222  | 0.2222222222  | 0.1375       | 0.2142857143 |
| <b>PY19L1</b> | 0.04761904762 | 0.04761904762 | 0.1666666667  | 0.1666666667  | 0.2          | 0.2857142857 |
| <b>PY19L1</b> | 0.04761904762 | 0.04761904762 | 0.1666666667  | 0.1666666667  | 0.2          | 0.2857142857 |
| <b>DPY19L</b> | 0.09523809524 | 0.09523809524 | 0.05555555556 | 0.05555555556 | 1.473684211  | 1.714285714  |
| <b>PY19L2</b> | 0.04761904762 | 0.04761904762 | 0.2222222222  | 0.2222222222  | 0.1375       | 0.2142857143 |
| <b>PY19L2</b> | 0.04761904762 | 0.04761904762 | 0.05555555556 | 0.05555555556 | 0.7          | 0.8571428571 |
| <b>PY19L2</b> | 0.04761904762 | 0.04761904762 | 0.1666666667  | 0.1666666667  | 0.2          | 0.2857142857 |
| <b>PY19L2</b> | 0.09523809524 | 0.09523809524 | 0.05555555556 | 0.05555555556 | 1.473684211  | 1.714285714  |
| <b>DPY19L</b> | 0.04761904762 | 0.04761904762 | 0.05555555556 | 0.05555555556 | 0.7          | 0.8571428571 |
| <b>DPY19L</b> | 0.1904761905  | 0.1904761905  | 0.1111111111  | 0.1111111111  | 1.529411765  | 1.714285714  |
| <b>DPY30</b>  | 0.1428571429  | 0.1428571429  | 0             | 0             | inf          | 1.42857E+32  |
| <b>DPYD</b>   | 0.04761904762 | 0.04761904762 | 0.05555555556 | 0.05555555556 | 0.7          | 0.8571428571 |
| <b>PYD-AS</b> | 0.04761904762 | 0.04761904762 | 0.05555555556 | 0.05555555556 | 0.7          | 0.8571428571 |
| <b>PYD-AS</b> | 0.04761904762 | 0.04761904762 | 0.05555555556 | 0.05555555556 | 0.7          | 0.8571428571 |
| <b>DPYS</b>   | 0.1904761905  | 0.1904761905  | 0.1111111111  | 0.1111111111  | 1.529411765  | 1.714285714  |
| <b>DPYSL2</b> | 0.04761904762 | 0.04761904762 | 0.1111111111  | 0.1111111111  | 0.325        | 0.4285714286 |
| <b>DPYSL4</b> | 0.2380952381  | 0.2380952381  | 0             | 0             | inf          | 2.38095E+32  |
| <b>DQX1</b>   | 0             | 0             | 0.05555555556 | 0.05555555556 | 0            | 0            |
| <b>DR1</b>    | 0.04761904762 | 0.04761904762 | 0.05555555556 | 0.05555555556 | 0.7          | 0.8571428571 |
| <b>DRAIC</b>  | 0.04761904762 | 0.04761904762 | 0.05555555556 | 0.05555555556 | 0.7          | 0.8571428571 |
| <b>DRAM1</b>  | 0.04761904762 | 0.04761904762 | 0.05555555556 | 0.05555555556 | 0.7          | 0.8571428571 |
| <b>DRAM2</b>  | 0.04761904762 | 0.04761904762 | 0             | 0             | inf          | 4.7619E+31   |
| <b>DRAXIN</b> | 0.04761904762 | 0.04761904762 | 0.1111111111  | 0.1111111111  | 0.325        | 0.4285714286 |
| <b>DRC3</b>   | 0.04761904762 | 0.04761904762 | 0.1111111111  | 0.1111111111  | 0.325        | 0.4285714286 |
| <b>DRC7</b>   | 0.04761904762 | 0.04761904762 | 0             | 0             | inf          | 4.7619E+31   |
| <b>DRD1</b>   | 0             | 0             | 0.05555555556 | 0.05555555556 | 0            | 0            |
| <b>DRD3</b>   | 0.09523809524 | 0.09523809524 | 0.05555555556 | 0.05555555556 | 1.473684211  | 1.714285714  |
| <b>DRD4</b>   | 0.04761904762 | 0.04761904762 | 0             | 0             | inf          | 4.7619E+31   |
| <b>DRD5P2</b> | 0.1428571429  | 0.1428571429  | 0.05555555556 | 0.05555555556 | 2.333333333  | 2.571428571  |
| <b>DRG1</b>   | 0.04761904762 | 0.04761904762 | 0.1111111111  | 0.1111111111  | 0.325        | 0.4285714286 |
| <b>DRG2</b>   | 0.04761904762 | 0.04761904762 | 0.1111111111  | 0.1111111111  | 0.325        | 0.4285714286 |
| <b>DRGX</b>   | 0.09523809524 | 0.09523809524 | 0.05555555556 | 0.05555555556 | 1.473684211  | 1.714285714  |
| <b>DROSHA</b> | 0.04761904762 | 0.04761904762 | 0.05555555556 | 0.05555555556 | 0.7          | 0.8571428571 |
| <b>DSC1</b>   | 0.09523809524 | 0.09523809524 | 0             | 0             | inf          | 9.52381E+31  |
| <b>DSC2</b>   | 0.09523809524 | 0.09523809524 | 0             | 0             | inf          | 9.52381E+31  |
| <b>DSC3</b>   | 0.09523809524 | 0.09523809524 | 0             | 0             | inf          | 9.52381E+31  |
| <b>DSCAM</b>  | 0.04761904762 | 0.04761904762 | 0.05555555556 | 0.05555555556 | 0.7          | 0.8571428571 |
| <b>SCAM-A</b> | 0.04761904762 | 0.04761904762 | 0.05555555556 | 0.05555555556 | 0.7          | 0.8571428571 |
| <b>SCAM-I</b> | 0.04761904762 | 0.04761904762 | 0.05555555556 | 0.05555555556 | 0.7          | 0.8571428571 |
| <b>DSCAS</b>  | 0.09523809524 | 0.09523809524 | 0             | 0             | inf          | 9.52381E+31  |
| <b>DSCC1</b>  | 0.09523809524 | 0.09523809524 | 0.1666666667  | 0.1666666667  | 0.4210526316 | 0.5714285714 |

|               |               |               |              |              |              |              |
|---------------|---------------|---------------|--------------|--------------|--------------|--------------|
| <b>DSCR10</b> | 0.04761904762 | 0.04761904762 | 0.1111111111 | 0.1111111111 | 0.325        | 0.4285714286 |
| <b>DSCR4</b>  | 0.04761904762 | 0.04761904762 | 0.1111111111 | 0.1111111111 | 0.325        | 0.4285714286 |
| <b>DSCR8</b>  | 0.04761904762 | 0.04761904762 | 0.1111111111 | 0.1111111111 | 0.325        | 0.4285714286 |
| <b>DSCR9</b>  | 0.04761904762 | 0.04761904762 | 0.1666666667 | 0.1666666667 | 0.2          | 0.2857142857 |
| <b>DSG1</b>   | 0.09523809524 | 0.09523809524 | 0            | 0            | inf          | 9.52381E+31  |
| <b>SG1-AS</b> | 0.09523809524 | 0.09523809524 | 0            | 0            | inf          | 9.52381E+31  |
| <b>DSG2</b>   | 0.09523809524 | 0.09523809524 | 0            | 0            | inf          | 9.52381E+31  |
| <b>SG2-AS</b> | 0.09523809524 | 0.09523809524 | 0            | 0            | inf          | 9.52381E+31  |
| <b>DSG3</b>   | 0.09523809524 | 0.09523809524 | 0            | 0            | inf          | 9.52381E+31  |
| <b>DSG4</b>   | 0.09523809524 | 0.09523809524 | 0            | 0            | inf          | 9.52381E+31  |
| <b>DSN1</b>   | 0.09523809524 | 0.09523809524 | 0.1111111111 | 0.1111111111 | 0.6842105263 | 0.8571428571 |
| <b>DSPP</b>   | 0             | 0             | 0.0555555556 | 0.0555555556 | 0            | 0            |
| <b>DST</b>    | 0.04761904762 | 0.04761904762 | 0.0555555556 | 0.0555555556 | 0.7          | 0.8571428571 |
| <b>DSTN</b>   | 0.1904761905  | 0.1904761905  | 0.1111111111 | 0.1111111111 | 1.529411765  | 1.714285714  |
| <b>DSTNP2</b> | 0.04761904762 | 0.04761904762 | 0.1111111111 | 0.1111111111 | 0.325        | 0.4285714286 |
| <b>DSTYK</b>  | 0.1904761905  | 0.1904761905  | 0            | 0            | inf          | 1.90476E+32  |
| <b>DTD1</b>   | 0.1904761905  | 0.1904761905  | 0.0555555556 | 0.0555555556 | 3.294117647  | 3.428571429  |
| <b>DTD2</b>   | 0             | 0             | 0            | 0            |              | 0.00001      |
| <b>DTL</b>    | 0.1428571429  | 0.1428571429  | 0            | 0            | inf          | 1.42857E+32  |
| <b>DTNA</b>   | 0.09523809524 | 0.09523809524 | 0            | 0            | inf          | 9.52381E+31  |
| <b>DTWD1</b>  | 0.04761904762 | 0.04761904762 | 0.0555555556 | 0.0555555556 | 0.7          | 0.8571428571 |
| <b>DTWD2</b>  | 0.04761904762 | 0.04761904762 | 0            | 0            | inf          | 4.7619E+31   |
| <b>DTX1</b>   | 0             | 0             | 0.0555555556 | 0.0555555556 | 0            | 0            |
| <b>DTX2</b>   | 0.09523809524 | 0.09523809524 | 0.1111111111 | 0.1111111111 | 0.6842105263 | 0.8571428571 |
| <b>PK3BP1</b> | 0.04761904762 | 0.04761904762 | 0.1111111111 | 0.1111111111 | 0.325        | 0.4285714286 |
| <b>DTX3</b>   | 0.1428571429  | 0.1428571429  | 0.0555555556 | 0.0555555556 | 2.333333333  | 2.571428571  |
| <b>DTX3L</b>  | 0.09523809524 | 0.09523809524 | 0.0555555556 | 0.0555555556 | 1.473684211  | 1.714285714  |
| <b>DTYMK</b>  | 0             | 0             | 0.0555555556 | 0.0555555556 | 0            | 0            |
| <b>DUBR</b>   | 0.09523809524 | 0.09523809524 | 0.0555555556 | 0.0555555556 | 1.473684211  | 1.714285714  |
| <b>DUOX1</b>  | 0.04761904762 | 0.04761904762 | 0            | 0            | inf          | 4.7619E+31   |
| <b>DUOX2</b>  | 0.04761904762 | 0.04761904762 | 0            | 0            | inf          | 4.7619E+31   |
| <b>DUOXA1</b> | 0.04761904762 | 0.04761904762 | 0            | 0            | inf          | 4.7619E+31   |
| <b>DUOXA2</b> | 0.04761904762 | 0.04761904762 | 0            | 0            | inf          | 4.7619E+31   |
| <b>DUPD1</b>  | 0.1904761905  | 0.1904761905  | 0.0555555556 | 0.0555555556 | 3.294117647  | 3.428571429  |
| <b>DUS1L</b>  | 0.04761904762 | 0.04761904762 | 0            | 0            | inf          | 4.7619E+31   |
| <b>DUS2</b>   | 0.1428571429  | 0.1428571429  | 0.0555555556 | 0.0555555556 | 2.333333333  | 2.571428571  |
| <b>DUS3L</b>  | 0.1428571429  | 0.1428571429  | 0.0555555556 | 0.0555555556 | 2.333333333  | 2.571428571  |
| <b>DUS4L</b>  | 0.04761904762 | 0.04761904762 | 0.0555555556 | 0.0555555556 | 0.7          | 0.8571428571 |
| <b>DUSP1</b>  | 0             | 0             | 0.0555555556 | 0.0555555556 | 0            | 0            |
| <b>DUSP10</b> | 0.1904761905  | 0.1904761905  | 0.0555555556 | 0.0555555556 | 3.294117647  | 3.428571429  |
| <b>DUSP11</b> | 0             | 0             | 0.0555555556 | 0.0555555556 | 0            | 0            |
| <b>DUSP12</b> | 0.1428571429  | 0.1428571429  | 0            | 0            | inf          | 1.42857E+32  |
| <b>DUSP13</b> | 0.1904761905  | 0.1904761905  | 0.0555555556 | 0.0555555556 | 3.294117647  | 3.428571429  |
| <b>DUSP15</b> | 0.09523809524 | 0.09523809524 | 0.1111111111 | 0.1111111111 | 0.6842105263 | 0.8571428571 |
| <b>DUSP16</b> | 0.04761904762 | 0.04761904762 | 0.0555555556 | 0.0555555556 | 0.7          | 0.8571428571 |
| <b>DUSP18</b> | 0.04761904762 | 0.04761904762 | 0.1111111111 | 0.1111111111 | 0.325        | 0.4285714286 |
| <b>DUSP19</b> | 0             | 0             | 0.0555555556 | 0.0555555556 | 0            | 0            |
| <b>DUSP2</b>  | 0             | 0             | 0.1111111111 | 0.1111111111 | 0            | 0            |
| <b>DUSP23</b> | 0.1428571429  | 0.1428571429  | 0            | 0            | inf          | 1.42857E+32  |
| <b>DUSP26</b> | 0.04761904762 | 0.04761904762 | 0.1111111111 | 0.1111111111 | 0.325        | 0.4285714286 |
| <b>DUSP27</b> | 0.1428571429  | 0.1428571429  | 0            | 0            | inf          | 1.42857E+32  |

|         |               |               |               |               |              |              |
|---------|---------------|---------------|---------------|---------------|--------------|--------------|
| DUSP28  | 0.04761904762 | 0.04761904762 | 0.05555555556 | 0.05555555556 | 0.7          | 0.8571428571 |
| DUSP3   | 0.09523809524 | 0.09523809524 | 0             | 0             | inf          | 9.52381E+31  |
| DUSP4   | 0.04761904762 | 0.04761904762 | 0.11111111111 | 0.11111111111 | 0.325        | 0.4285714286 |
| DUSP5   | 0.1428571429  | 0.1428571429  | 0.05555555556 | 0.05555555556 | 2.333333333  | 2.571428571  |
| DUSP5P  | 0.1428571429  | 0.1428571429  | 0             | 0             | inf          | 1.42857E+32  |
| DUSP6   | 0.04761904762 | 0.04761904762 | 0.05555555556 | 0.05555555556 | 0.7          | 0.8571428571 |
| DUSP7   | 0.04761904762 | 0.04761904762 | 0             | 0             | inf          | 4.7619E+31   |
| DUSP8   | 0.04761904762 | 0.04761904762 | 0             | 0             | inf          | 4.7619E+31   |
| DUT     | 0.04761904762 | 0.04761904762 | 0.05555555556 | 0.05555555556 | 0.7          | 0.8571428571 |
| DUXA    | 0.1428571429  | 0.1428571429  | 0.05555555556 | 0.05555555556 | 2.333333333  | 2.571428571  |
| DUXAP1  | 0.1428571429  | 0.1428571429  | 0.11111111111 | 0.11111111111 | 1.083333333  | 1.285714286  |
| DUXAP8  | 0.09523809524 | 0.09523809524 | 0.05555555556 | 0.05555555556 | 1.473684211  | 1.714285714  |
| DUXAP9  | 0.1428571429  | 0.1428571429  | 0.11111111111 | 0.11111111111 | 1.083333333  | 1.285714286  |
| DUXB    | 0.04761904762 | 0.04761904762 | 0             | 0             | inf          | 4.7619E+31   |
| DVL1    | 0             | 0             | 0.11111111111 | 0.11111111111 | 0            | 0            |
| DVL2    | 0             | 0             | 0.05555555556 | 0.05555555556 | 0            | 0            |
| DVL3    | 0.1428571429  | 0.1428571429  | 0.05555555556 | 0.05555555556 | 2.333333333  | 2.571428571  |
| DXO     | 0.04761904762 | 0.04761904762 | 0             | 0             | inf          | 4.7619E+31   |
| DYDC1   | 0.1428571429  | 0.1428571429  | 0             | 0             | inf          | 1.42857E+32  |
| DYDC2   | 0.1428571429  | 0.1428571429  | 0             | 0             | inf          | 1.42857E+32  |
| DYM     | 0.04761904762 | 0.04761904762 | 0             | 0             | inf          | 4.7619E+31   |
| DYNAP   | 0.09523809524 | 0.09523809524 | 0             | 0             | inf          | 9.52381E+31  |
| DYNC1I  | 0.04761904762 | 0.04761904762 | 0.11111111111 | 0.11111111111 | 0.325        | 0.4285714286 |
| DYNC1I2 | 0             | 0             | 0.05555555556 | 0.05555555556 | 0            | 0            |
| YNC1LI  | 0.09523809524 | 0.09523809524 | 0             | 0             | inf          | 9.52381E+31  |
| YNC1LI2 | 0.09523809524 | 0.09523809524 | 0.05555555556 | 0.05555555556 | 1.473684211  | 1.714285714  |
| YNC2LI  | 0             | 0             | 0.05555555556 | 0.05555555556 | 0            | 0            |
| DYNLL1  | 0             | 0             | 0.11111111111 | 0.11111111111 | 0            | 0            |
| DYNLL2  | 0.09523809524 | 0.09523809524 | 0             | 0             | inf          | 9.52381E+31  |
| YNLRB   | 0.09523809524 | 0.09523809524 | 0.11111111111 | 0.11111111111 | 0.6842105263 | 0.8571428571 |
| YNLRB2  | 0.09523809524 | 0.09523809524 | 0             | 0             | inf          | 9.52381E+31  |
| DYRK1A  | 0.04761904762 | 0.04761904762 | 0.16666666667 | 0.16666666667 | 0.2          | 0.2857142857 |
| DYRK1B  | 0.04761904762 | 0.04761904762 | 0.05555555556 | 0.05555555556 | 0.7          | 0.8571428571 |
| DYRK2   | 0.09523809524 | 0.09523809524 | 0.05555555556 | 0.05555555556 | 1.473684211  | 1.714285714  |
| DYRK3   | 0.1428571429  | 0.1428571429  | 0             | 0             | inf          | 1.42857E+32  |
| DYRK4   | 0.04761904762 | 0.04761904762 | 0.11111111111 | 0.11111111111 | 0.325        | 0.4285714286 |
| DYSF    | 0             | 0             | 0.05555555556 | 0.05555555556 | 0            | 0            |
| DYTN    | 0             | 0             | 0.05555555556 | 0.05555555556 | 0            | 0            |
| DZANK1  | 0.1904761905  | 0.1904761905  | 0.05555555556 | 0.05555555556 | 3.294117647  | 3.428571429  |
| DZIP1L  | 0.1428571429  | 0.1428571429  | 0.05555555556 | 0.05555555556 | 2.333333333  | 2.571428571  |
| DZIP3   | 0.09523809524 | 0.09523809524 | 0.05555555556 | 0.05555555556 | 1.473684211  | 1.714285714  |
| E2F1    | 0.09523809524 | 0.09523809524 | 0.11111111111 | 0.11111111111 | 0.6842105263 | 0.8571428571 |
| E2F2    | 0.04761904762 | 0.04761904762 | 0.11111111111 | 0.11111111111 | 0.325        | 0.4285714286 |
| E2F4    | 0.1428571429  | 0.1428571429  | 0.05555555556 | 0.05555555556 | 2.333333333  | 2.571428571  |
| E2F5    | 0.1428571429  | 0.1428571429  | 0.11111111111 | 0.11111111111 | 1.083333333  | 1.285714286  |
| E2F6    | 0             | 0             | 0.05555555556 | 0.05555555556 | 0            | 0            |
| E2F7    | 0.04761904762 | 0.04761904762 | 0.11111111111 | 0.11111111111 | 0.325        | 0.4285714286 |
| E4F1    | 0.09523809524 | 0.09523809524 | 0.22222222222 | 0.22222222222 | 0.2894736842 | 0.4285714286 |
| EAF1    | 0.04761904762 | 0.04761904762 | 0             | 0             | inf          | 4.7619E+31   |
| EAF2    | 0.09523809524 | 0.09523809524 | 0.05555555556 | 0.05555555556 | 1.473684211  | 1.714285714  |
| EAPP    | 0.09523809524 | 0.09523809524 | 0             | 0             | inf          | 9.52381E+31  |

|               |               |               |               |               |              |              |
|---------------|---------------|---------------|---------------|---------------|--------------|--------------|
| <b>EARS2</b>  | 0.04761904762 | 0.04761904762 | 0             | 0             | inf          | 4.7619E+31   |
| <b>EBAG9</b>  | 0.1904761905  | 0.1904761905  | 0.1111111111  | 0.1111111111  | 1.529411765  | 1.714285714  |
| <b>EBF1</b>   | 0.04761904762 | 0.04761904762 | 0.05555555556 | 0.05555555556 | 0.7          | 0.8571428571 |
| <b>EBF2</b>   | 0.04761904762 | 0.04761904762 | 0.1111111111  | 0.1111111111  | 0.325        | 0.4285714286 |
| <b>EBF3</b>   | 0.2857142857  | 0.2857142857  | 0             | 0             | inf          | 2.85714E+32  |
| <b>EBF4</b>   | 0.1904761905  | 0.1904761905  | 0.05555555556 | 0.05555555556 | 3.294117647  | 3.428571429  |
| <b>EBI3</b>   | 0.09523809524 | 0.09523809524 | 0.05555555556 | 0.05555555556 | 1.473684211  | 1.714285714  |
| <b>EBLN1</b>  | 0.09523809524 | 0.09523809524 | 0.1111111111  | 0.1111111111  | 0.6842105263 | 0.8571428571 |
| <b>EBLN2</b>  | 0.04761904762 | 0.04761904762 | 0             | 0             | inf          | 4.7619E+31   |
| <b>EBLN3P</b> | 0.09523809524 | 0.09523809524 | 0.05555555556 | 0.05555555556 | 1.473684211  | 1.714285714  |
| <b>BNA1BF</b> | 0.04761904762 | 0.04761904762 | 0.05555555556 | 0.05555555556 | 0.7          | 0.8571428571 |
| <b>ECD</b>    | 0.1904761905  | 0.1904761905  | 0.05555555556 | 0.05555555556 | 3.294117647  | 3.428571429  |
| <b>ECE1</b>   | 0.04761904762 | 0.04761904762 | 0.1111111111  | 0.1111111111  | 0.325        | 0.4285714286 |
| <b>ECE2</b>   | 0.1428571429  | 0.1428571429  | 0.05555555556 | 0.05555555556 | 2.333333333  | 2.571428571  |
| <b>ECEL1</b>  | 0             | 0             | 0.05555555556 | 0.05555555556 | 0            | 0            |
| <b>CEL1P</b>  | 0             | 0             | 0.05555555556 | 0.05555555556 | 0            | 0            |
| <b>ECH1</b>   | 0.04761904762 | 0.04761904762 | 0.05555555556 | 0.05555555556 | 0.7          | 0.8571428571 |
| <b>ECHDC2</b> | 0.04761904762 | 0.04761904762 | 0.05555555556 | 0.05555555556 | 0.7          | 0.8571428571 |
| <b>ECHDC3</b> | 0.09523809524 | 0.09523809524 | 0.1111111111  | 0.1111111111  | 0.6842105263 | 0.8571428571 |
| <b>ECHS1</b>  | 0.1904761905  | 0.1904761905  | 0             | 0             | inf          | 1.90476E+32  |
| <b>ECH</b>    | 0.09523809524 | 0.09523809524 | 0.2222222222  | 0.2222222222  | 0.2894736842 | 0.4285714286 |
| <b>ECM1</b>   | 0.1904761905  | 0.1904761905  | 0.05555555556 | 0.05555555556 | 3.294117647  | 3.428571429  |
| <b>ECM2</b>   | 0.04761904762 | 0.04761904762 | 0.05555555556 | 0.05555555556 | 0.7          | 0.8571428571 |
| <b>ECPAS</b>  | 0.04761904762 | 0.04761904762 | 0.05555555556 | 0.05555555556 | 0.7          | 0.8571428571 |
| <b>ECSCR</b>  | 0.04761904762 | 0.04761904762 | 0             | 0             | inf          | 4.7619E+31   |
| <b>ECSIT</b>  | 0.1428571429  | 0.1428571429  | 0.1111111111  | 0.1111111111  | 1.083333333  | 1.285714286  |
| <b>ECT2</b>   | 0.1904761905  | 0.1904761905  | 0.05555555556 | 0.05555555556 | 3.294117647  | 3.428571429  |
| <b>EDAR</b>   | 0             | 0             | 0.05555555556 | 0.05555555556 | 0            | 0            |
| <b>DARAD</b>  | 0.1428571429  | 0.1428571429  | 0             | 0             | inf          | 1.42857E+32  |
| <b>EDC3</b>   | 0.04761904762 | 0.04761904762 | 0.05555555556 | 0.05555555556 | 0.7          | 0.8571428571 |
| <b>EDC4</b>   | 0.1428571429  | 0.1428571429  | 0.05555555556 | 0.05555555556 | 2.333333333  | 2.571428571  |
| <b>EDDM13</b> | 0.1428571429  | 0.1428571429  | 0.05555555556 | 0.05555555556 | 2.333333333  | 2.571428571  |
| <b>EDEM1</b>  | 0.04761904762 | 0.04761904762 | 0             | 0             | inf          | 4.7619E+31   |
| <b>EDEM2</b>  | 0.09523809524 | 0.09523809524 | 0.1111111111  | 0.1111111111  | 0.6842105263 | 0.8571428571 |
| <b>EDEM3</b>  | 0.1428571429  | 0.1428571429  | 0.05555555556 | 0.05555555556 | 2.333333333  | 2.571428571  |
| <b>EDF1</b>   | 0.1428571429  | 0.1428571429  | 0.05555555556 | 0.05555555556 | 2.333333333  | 2.571428571  |
| <b>EDIL3</b>  | 0.04761904762 | 0.04761904762 | 0.05555555556 | 0.05555555556 | 0.7          | 0.8571428571 |
| <b>EDN1</b>   | 0.04761904762 | 0.04761904762 | 0             | 0             | inf          | 4.7619E+31   |
| <b>EDN2</b>   | 0.04761904762 | 0.04761904762 | 0.05555555556 | 0.05555555556 | 0.7          | 0.8571428571 |
| <b>EDN3</b>   | 0.1428571429  | 0.1428571429  | 0.1666666667  | 0.1666666667  | 0.6666666667 | 0.8571428571 |
| <b>EDNRA</b>  | 0             | 0             | 0.05555555556 | 0.05555555556 | 0            | 0            |
| <b>EDRF1</b>  | 0.2380952381  | 0.2380952381  | 0.05555555556 | 0.05555555556 | 4.375        | 4.285714286  |
| <b>DRF1-A</b> | 0.2380952381  | 0.2380952381  | 0.05555555556 | 0.05555555556 | 4.375        | 4.285714286  |
| <b>DRF1-D</b> | 0.2380952381  | 0.2380952381  | 0.05555555556 | 0.05555555556 | 4.375        | 4.285714286  |
| <b>EEA1</b>   | 0.04761904762 | 0.04761904762 | 0.05555555556 | 0.05555555556 | 0.7          | 0.8571428571 |
| <b>EEF1A1</b> | 0.04761904762 | 0.04761904762 | 0             | 0             | inf          | 4.7619E+31   |
| <b>EEF1A2</b> | 0.1428571429  | 0.1428571429  | 0.2222222222  | 0.2222222222  | 0.4583333333 | 0.6428571429 |
| <b>FIAKM</b>  | 0.04761904762 | 0.04761904762 | 0             | 0             | inf          | 4.7619E+31   |
| <b>FIAKM</b>  | 0.2380952381  | 0.2380952381  | 0.05555555556 | 0.05555555556 | 4.375        | 4.285714286  |
| <b>FIAKM</b>  | 0.1428571429  | 0.1428571429  | 0.05555555556 | 0.05555555556 | 2.333333333  | 2.571428571  |
| <b>FIAKM</b>  | 0.1428571429  | 0.1428571429  | 0.05555555556 | 0.05555555556 | 2.333333333  | 2.571428571  |



|         |               |               |              |              |              |              |
|---------|---------------|---------------|--------------|--------------|--------------|--------------|
| AKMT4   | 0.1428571429  | 0.1428571429  | 0.0555555556 | 0.0555555556 | 2.333333333  | 2.571428571  |
| FLAKN1  | 0.1428571429  | 0.1428571429  | 0.0555555556 | 0.0555555556 | 2.333333333  | 2.571428571  |
| EEF1B2  | 0             | 0             | 0.0555555556 | 0.0555555556 | 0            | 0            |
| EEF1D   | 0.04761904762 | 0.04761904762 | 0.1666666667 | 0.1666666667 | 0.2          | 0.2857142857 |
| EEF2    | 0.09523809524 | 0.09523809524 | 0.0555555556 | 0.0555555556 | 1.473684211  | 1.714285714  |
| EEF2K   | 0.04761904762 | 0.04761904762 | 0            | 0            | inf          | 4.7619E+31   |
| EF2KM   | 0.04761904762 | 0.04761904762 | 0            | 0            | inf          | 4.7619E+31   |
| EEFSEC  | 0.09523809524 | 0.09523809524 | 0.0555555556 | 0.0555555556 | 1.473684211  | 1.714285714  |
| EEPDI   | 0.04761904762 | 0.04761904762 | 0.2222222222 | 0.2222222222 | 0.1375       | 0.2142857143 |
| EFCAB1  | 0.09523809524 | 0.09523809524 | 0.1666666667 | 0.1666666667 | 0.4210526316 | 0.5714285714 |
| FCAB1   | 0.04761904762 | 0.04761904762 | 0.0555555556 | 0.0555555556 | 0.7          | 0.8571428571 |
| FCAB1   | 0.09523809524 | 0.09523809524 | 0.0555555556 | 0.0555555556 | 1.473684211  | 1.714285714  |
| FCAB1   | 0.1428571429  | 0.1428571429  | 0            | 0            | inf          | 1.42857E+32  |
| FCAB1   | 0.04761904762 | 0.04761904762 | 0.0555555556 | 0.0555555556 | 0.7          | 0.8571428571 |
| CAB14-A | 0.04761904762 | 0.04761904762 | 0.0555555556 | 0.0555555556 | 0.7          | 0.8571428571 |
| EFCAB2  | 0.1428571429  | 0.1428571429  | 0.0555555556 | 0.0555555556 | 2.333333333  | 2.571428571  |
| EFCAB3  | 0.04761904762 | 0.04761904762 | 0            | 0            | inf          | 4.7619E+31   |
| EFCAB5  | 0             | 0             | 0.0555555556 | 0.0555555556 | 0            | 0            |
| EFCAB6  | 0             | 0             | 0.1666666667 | 0.1666666667 | 0            | 0            |
| CAB6-A  | 0             | 0             | 0.1666666667 | 0.1666666667 | 0            | 0            |
| EFCAB7  | 0.04761904762 | 0.04761904762 | 0.0555555556 | 0.0555555556 | 0.7          | 0.8571428571 |
| EFCAB8  | 0.09523809524 | 0.09523809524 | 0.1111111111 | 0.1111111111 | 0.6842105263 | 0.8571428571 |
| EFCAB9  | 0             | 0             | 0.0555555556 | 0.0555555556 | 0            | 0            |
| EFCC1   | 0.09523809524 | 0.09523809524 | 0.0555555556 | 0.0555555556 | 1.473684211  | 1.714285714  |
| EFEMP1  | 0.04761904762 | 0.04761904762 | 0.0555555556 | 0.0555555556 | 0.7          | 0.8571428571 |
| EFHB    | 0.04761904762 | 0.04761904762 | 0            | 0            | inf          | 4.7619E+31   |
| EFHC1   | 0.04761904762 | 0.04761904762 | 0            | 0            | inf          | 4.7619E+31   |
| EFHD1   | 0             | 0             | 0.0555555556 | 0.0555555556 | 0            | 0            |
| EFHD2   | 0.04761904762 | 0.04761904762 | 0.1111111111 | 0.1111111111 | 0.325        | 0.4285714286 |
| EFL1    | 0.04761904762 | 0.04761904762 | 0.0555555556 | 0.0555555556 | 0.7          | 0.8571428571 |
| EFL1P1  | 0.04761904762 | 0.04761904762 | 0.0555555556 | 0.0555555556 | 0.7          | 0.8571428571 |
| EFNA1   | 0.1904761905  | 0.1904761905  | 0.1111111111 | 0.1111111111 | 1.529411765  | 1.714285714  |
| EFNA2   | 0.09523809524 | 0.09523809524 | 0.1111111111 | 0.1111111111 | 0.6842105263 | 0.8571428571 |
| EFNA3   | 0.1904761905  | 0.1904761905  | 0.1111111111 | 0.1111111111 | 1.529411765  | 1.714285714  |
| EFNA4   | 0.1904761905  | 0.1904761905  | 0.1111111111 | 0.1111111111 | 1.529411765  | 1.714285714  |
| EFNA5   | 0.04761904762 | 0.04761904762 | 0            | 0            | inf          | 4.7619E+31   |
| EFNB3   | 0             | 0             | 0.0555555556 | 0.0555555556 | 0            | 0            |
| EFR3A   | 0.04761904762 | 0.04761904762 | 0.1111111111 | 0.1111111111 | 0.325        | 0.4285714286 |
| EFS     | 0             | 0             | 0.0555555556 | 0.0555555556 | 0            | 0            |
| EFTUD2  | 0.1428571429  | 0.1428571429  | 0            | 0            | inf          | 1.42857E+32  |
| EGF     | 0             | 0             | 0.0555555556 | 0.0555555556 | 0            | 0            |
| GFEM1   | 0.1428571429  | 0.1428571429  | 0.0555555556 | 0.0555555556 | 2.333333333  | 2.571428571  |
| EGFL7   | 0.1428571429  | 0.1428571429  | 0.0555555556 | 0.0555555556 | 2.333333333  | 2.571428571  |
| EGFL8   | 0.04761904762 | 0.04761904762 | 0            | 0            | inf          | 4.7619E+31   |
| GFLAM   | 0.04761904762 | 0.04761904762 | 0.0555555556 | 0.0555555556 | 0.7          | 0.8571428571 |
| FLAM-A  | 0.04761904762 | 0.04761904762 | 0.0555555556 | 0.0555555556 | 0.7          | 0.8571428571 |
| FLAM-A  | 0.04761904762 | 0.04761904762 | 0.0555555556 | 0.0555555556 | 0.7          | 0.8571428571 |
| EGFR    | 0.380952381   | 0.380952381   | 0.2222222222 | 0.2222222222 | 1.692307692  | 1.714285714  |
| GFR-AS  | 0.380952381   | 0.380952381   | 0.2222222222 | 0.2222222222 | 1.692307692  | 1.714285714  |
| EGOT    | 0.04761904762 | 0.04761904762 | 0            | 0            | inf          | 4.7619E+31   |
| EGR1    | 0.04761904762 | 0.04761904762 | 0            | 0            | inf          | 4.7619E+31   |

|                |               |               |              |              |              |              |
|----------------|---------------|---------------|--------------|--------------|--------------|--------------|
| <b>EGR2</b>    | 0.04761904762 | 0.04761904762 | 0.1666666667 | 0.1666666667 | 0.2          | 0.2857142857 |
| <b>EGR3</b>    | 0.04761904762 | 0.04761904762 | 0.1111111111 | 0.1111111111 | 0.325        | 0.4285714286 |
| <b>EGR4</b>    | 0             | 0             | 0.0555555556 | 0.0555555556 | 0            | 0            |
| <b>EHBP1</b>   | 0             | 0             | 0.0555555556 | 0.0555555556 | 0            | 0            |
| <b>EHD2</b>    | 0.09523809524 | 0.09523809524 | 0.1111111111 | 0.1111111111 | 0.6842105263 | 0.8571428571 |
| <b>EHD3</b>    | 0             | 0             | 0.0555555556 | 0.0555555556 | 0            | 0            |
| <b>HHADH</b>   | 0.1428571429  | 0.1428571429  | 0.0555555556 | 0.0555555556 | 2.333333333  | 2.571428571  |
| <b>HADH-A</b>  | 0.1428571429  | 0.1428571429  | 0.0555555556 | 0.0555555556 | 2.333333333  | 2.571428571  |
| <b>EHMT1</b>   | 0.09523809524 | 0.09523809524 | 0            | 0            | inf          | 9.52381E+31  |
| <b>EHMT2</b>   | 0.04761904762 | 0.04761904762 | 0            | 0            | inf          | 4.7619E+31   |
| <b>EID1</b>    | 0.04761904762 | 0.04761904762 | 0.0555555556 | 0.0555555556 | 0.7          | 0.8571428571 |
| <b>EID2</b>    | 0.04761904762 | 0.04761904762 | 0.0555555556 | 0.0555555556 | 0.7          | 0.8571428571 |
| <b>EID2B</b>   | 0.04761904762 | 0.04761904762 | 0.0555555556 | 0.0555555556 | 0.7          | 0.8571428571 |
| <b>EID3</b>    | 0.04761904762 | 0.04761904762 | 0.0555555556 | 0.0555555556 | 0.7          | 0.8571428571 |
| <b>EIF1</b>    | 0.09523809524 | 0.09523809524 | 0            | 0            | inf          | 9.52381E+31  |
| <b>EIF1B</b>   | 0.04761904762 | 0.04761904762 | 0            | 0            | inf          | 4.7619E+31   |
| <b>IF1B-AS</b> | 0.04761904762 | 0.04761904762 | 0            | 0            | inf          | 4.7619E+31   |
| <b>EIF2A</b>   | 0.1904761905  | 0.1904761905  | 0.1111111111 | 0.1111111111 | 1.529411765  | 1.714285714  |
| <b>EIF2AK0</b> | 0.04761904762 | 0.04761904762 | 0.1666666667 | 0.1666666667 | 0.2          | 0.2857142857 |
| <b>EIF2AK2</b> | 0             | 0             | 0.0555555556 | 0.0555555556 | 0            | 0            |
| <b>EIF2AK3</b> | 0             | 0             | 0.0555555556 | 0.0555555556 | 0            | 0            |
| <b>F2AK3-I</b> | 0             | 0             | 0.0555555556 | 0.0555555556 | 0            | 0            |
| <b>EIF2AK4</b> | 0             | 0             | 0            | 0            |              | 0.00001      |
| <b>EIF2B1</b>  | 0.04761904762 | 0.04761904762 | 0.1111111111 | 0.1111111111 | 0.325        | 0.4285714286 |
| <b>EIF2B3</b>  | 0.04761904762 | 0.04761904762 | 0.0555555556 | 0.0555555556 | 0.7          | 0.8571428571 |
| <b>EIF2B5</b>  | 0.1428571429  | 0.1428571429  | 0.0555555556 | 0.0555555556 | 2.333333333  | 2.571428571  |
| <b>EIF2D</b>   | 0.1428571429  | 0.1428571429  | 0            | 0            | inf          | 1.42857E+32  |
| <b>EIF2S2</b>  | 0.09523809524 | 0.09523809524 | 0.1111111111 | 0.1111111111 | 0.6842105263 | 0.8571428571 |
| <b>EIF2S3B</b> | 0.04761904762 | 0.04761904762 | 0.1111111111 | 0.1111111111 | 0.325        | 0.4285714286 |
| <b>EIF3A</b>   | 0.2380952381  | 0.2380952381  | 0            | 0            | inf          | 2.38095E+32  |
| <b>EIF3B</b>   | 0.04761904762 | 0.04761904762 | 0.1666666667 | 0.1666666667 | 0.2          | 0.2857142857 |
| <b>EIF3C</b>   | 0.04761904762 | 0.04761904762 | 0            | 0            | inf          | 4.7619E+31   |
| <b>EIF3CL</b>  | 0.04761904762 | 0.04761904762 | 0            | 0            | inf          | 4.7619E+31   |
| <b>EIF3D</b>   | 0             | 0             | 0.1111111111 | 0.1111111111 | 0            | 0            |
| <b>EIF3E</b>   | 0.1904761905  | 0.1904761905  | 0.1111111111 | 0.1111111111 | 1.529411765  | 1.714285714  |
| <b>EIF3G</b>   | 0.1428571429  | 0.1428571429  | 0.1111111111 | 0.1111111111 | 1.083333333  | 1.285714286  |
| <b>EIF3H</b>   | 0.1904761905  | 0.1904761905  | 0.1666666667 | 0.1666666667 | 0.9411764706 | 1.142857143  |
| <b>EIF3I</b>   | 0.04761904762 | 0.04761904762 | 0.1111111111 | 0.1111111111 | 0.325        | 0.4285714286 |
| <b>EIF3IP1</b> | 0.04761904762 | 0.04761904762 | 0.0555555556 | 0.0555555556 | 0.7          | 0.8571428571 |
| <b>EIF3K</b>   | 0.04761904762 | 0.04761904762 | 0.0555555556 | 0.0555555556 | 0.7          | 0.8571428571 |
| <b>EIF3L</b>   | 0             | 0             | 0.1111111111 | 0.1111111111 | 0            | 0            |
| <b>EIF3M</b>   | 0.04761904762 | 0.04761904762 | 0            | 0            | inf          | 4.7619E+31   |
| <b>EIF4A1</b>  | 0             | 0             | 0.0555555556 | 0.0555555556 | 0            | 0            |
| <b>EIF4A2</b>  | 0.09523809524 | 0.09523809524 | 0.0555555556 | 0.0555555556 | 1.473684211  | 1.714285714  |
| <b>EIF4A3</b>  | 0.04761904762 | 0.04761904762 | 0            | 0            | inf          | 4.7619E+31   |
| <b>EIF4B</b>   | 0.04761904762 | 0.04761904762 | 0.0555555556 | 0.0555555556 | 0.7          | 0.8571428571 |
| <b>EIF4E</b>   | 0             | 0             | 0.0555555556 | 0.0555555556 | 0            | 0            |
| <b>EIF4E1B</b> | 0.09523809524 | 0.09523809524 | 0.0555555556 | 0.0555555556 | 1.473684211  | 1.714285714  |
| <b>EIF4E2</b>  | 0             | 0             | 0.0555555556 | 0.0555555556 | 0            | 0            |
| <b>EIF4E3</b>  | 0.04761904762 | 0.04761904762 | 0            | 0            | inf          | 4.7619E+31   |
| <b>IF4EBP</b>  | 0.09523809524 | 0.09523809524 | 0.1111111111 | 0.1111111111 | 0.6842105263 | 0.8571428571 |

|          |               |               |               |               |              |              |
|----------|---------------|---------------|---------------|---------------|--------------|--------------|
| IF4EBP0  | 0.09523809524 | 0.09523809524 | 0             | 0             | inf          | 9.52381E+31  |
| IF4EBP0  | 0.04761904762 | 0.04761904762 | 0             | 0             | inf          | 4.7619E+31   |
| IF4ENIF0 | 0.04761904762 | 0.04761904762 | 0.1111111111  | 0.1111111111  | 0.325        | 0.4285714286 |
| EIF4G1   | 0.1428571429  | 0.1428571429  | 0.05555555556 | 0.05555555556 | 2.333333333  | 2.571428571  |
| EIF4G3   | 0.04761904762 | 0.04761904762 | 0.1111111111  | 0.1111111111  | 0.325        | 0.4285714286 |
| EIF4H    | 0.1428571429  | 0.1428571429  | 0.1111111111  | 0.1111111111  | 1.083333333  | 1.285714286  |
| EIF5A    | 0             | 0             | 0.05555555556 | 0.05555555556 | 0            | 0            |
| EIF5A2   | 0.1904761905  | 0.1904761905  | 0.05555555556 | 0.05555555556 | 3.294117647  | 3.428571429  |
| EIF5AL1  | 0.1428571429  | 0.1428571429  | 0.05555555556 | 0.05555555556 | 2.333333333  | 2.571428571  |
| EIF5B    | 0             | 0             | 0.05555555556 | 0.05555555556 | 0            | 0            |
| EIF6     | 0.09523809524 | 0.09523809524 | 0.1111111111  | 0.1111111111  | 0.6842105263 | 0.8571428571 |
| EIPR1    | 0             | 0             | 0.05555555556 | 0.05555555556 | 0            | 0            |
| ELAC1    | 0.04761904762 | 0.04761904762 | 0             | 0             | inf          | 4.7619E+31   |
| ELAC2    | 0.04761904762 | 0.04761904762 | 0.1111111111  | 0.1111111111  | 0.325        | 0.4285714286 |
| ELANE0   | 0.09523809524 | 0.09523809524 | 0.1111111111  | 0.1111111111  | 0.6842105263 | 0.8571428571 |
| ELAVL1   | 0.1428571429  | 0.1428571429  | 0.05555555556 | 0.05555555556 | 2.333333333  | 2.571428571  |
| ELAVL2   | 0.09523809524 | 0.09523809524 | 0.05555555556 | 0.05555555556 | 1.473684211  | 1.714285714  |
| ELAVL3   | 0.1428571429  | 0.1428571429  | 0.1111111111  | 0.1111111111  | 1.083333333  | 1.285714286  |
| ELAVL4   | 0             | 0             | 0             | 0             |              | 0.00001      |
| ELDR     | 0.380952381   | 0.380952381   | 0.2222222222  | 0.2222222222  | 1.692307692  | 1.714285714  |
| ELF2     | 0.04761904762 | 0.04761904762 | 0.05555555556 | 0.05555555556 | 0.7          | 0.8571428571 |
| ELF3     | 0.1428571429  | 0.1428571429  | 0             | 0             | inf          | 1.42857E+32  |
| LF3-AS   | 0.1428571429  | 0.1428571429  | 0             | 0             | inf          | 1.42857E+32  |
| ELFN1    | 0.04761904762 | 0.04761904762 | 0.1666666667  | 0.1666666667  | 0.2          | 0.2857142857 |
| LFN1-AS  | 0.04761904762 | 0.04761904762 | 0.1666666667  | 0.1666666667  | 0.2          | 0.2857142857 |
| ELFN2    | 0             | 0             | 0.1111111111  | 0.1111111111  | 0            | 0            |
| ELK3     | 0.04761904762 | 0.04761904762 | 0.05555555556 | 0.05555555556 | 0.7          | 0.8571428571 |
| ELK4     | 0.1428571429  | 0.1428571429  | 0             | 0             | inf          | 1.42857E+32  |
| ELL      | 0.1428571429  | 0.1428571429  | 0.1111111111  | 0.1111111111  | 1.083333333  | 1.285714286  |
| ELL2     | 0.04761904762 | 0.04761904762 | 0             | 0             | inf          | 4.7619E+31   |
| ELMO1    | 0.04761904762 | 0.04761904762 | 0.2222222222  | 0.2222222222  | 0.1375       | 0.2142857143 |
| MO1-A    | 0.04761904762 | 0.04761904762 | 0.2222222222  | 0.2222222222  | 0.1375       | 0.2142857143 |
| ELMO2    | 0.1428571429  | 0.1428571429  | 0.1666666667  | 0.1666666667  | 0.6666666667 | 0.8571428571 |
| ELMO3    | 0.1428571429  | 0.1428571429  | 0.05555555556 | 0.05555555556 | 2.333333333  | 2.571428571  |
| LMOD2    | 0             | 0             | 0.05555555556 | 0.05555555556 | 0            | 0            |
| LMOD3    | 0             | 0             | 0.05555555556 | 0.05555555556 | 0            | 0            |
| LMSAN0   | 0.09523809524 | 0.09523809524 | 0             | 0             | inf          | 9.52381E+31  |
| ELN      | 0.1428571429  | 0.1428571429  | 0.1111111111  | 0.1111111111  | 1.083333333  | 1.285714286  |
| ELOA     | 0.04761904762 | 0.04761904762 | 0.1111111111  | 0.1111111111  | 0.325        | 0.4285714286 |
| LOA-AS   | 0.04761904762 | 0.04761904762 | 0.1111111111  | 0.1111111111  | 0.325        | 0.4285714286 |
| ELOA2    | 0.04761904762 | 0.04761904762 | 0.05555555556 | 0.05555555556 | 0.7          | 0.8571428571 |
| ELOA3    | 0.04761904762 | 0.04761904762 | 0.05555555556 | 0.05555555556 | 0.7          | 0.8571428571 |
| ELOA3B   | 0.04761904762 | 0.04761904762 | 0.05555555556 | 0.05555555556 | 0.7          | 0.8571428571 |
| ELOA3C   | 0.04761904762 | 0.04761904762 | 0.05555555556 | 0.05555555556 | 0.7          | 0.8571428571 |
| ELOA3D   | 0.04761904762 | 0.04761904762 | 0.05555555556 | 0.05555555556 | 0.7          | 0.8571428571 |
| ELOB     | 0.04761904762 | 0.04761904762 | 0.1111111111  | 0.1111111111  | 0.325        | 0.4285714286 |
| ELOC     | 0.1904761905  | 0.1904761905  | 0.1111111111  | 0.1111111111  | 1.529411765  | 1.714285714  |
| ELOF1    | 0.1428571429  | 0.1428571429  | 0.1111111111  | 0.1111111111  | 1.083333333  | 1.285714286  |
| ELOVL1   | 0.04761904762 | 0.04761904762 | 0.05555555556 | 0.05555555556 | 0.7          | 0.8571428571 |
| ELOVL2   | 0.04761904762 | 0.04761904762 | 0             | 0             | inf          | 4.7619E+31   |
| OVL2-A   | 0.04761904762 | 0.04761904762 | 0             | 0             | inf          | 4.7619E+31   |

|        |               |               |               |               |              |              |
|--------|---------------|---------------|---------------|---------------|--------------|--------------|
| ELOVL3 | 0.1428571429  | 0.1428571429  | 0.05555555556 | 0.05555555556 | 2.333333333  | 2.571428571  |
| ELOVL5 | 0.04761904762 | 0.04761904762 | 0             | 0             | inf          | 4.7619E+31   |
| ELOVL6 | 0             | 0             | 0.05555555556 | 0.05555555556 | 0            | 0            |
| ELOVL7 | 0.04761904762 | 0.04761904762 | 0             | 0             | inf          | 4.7619E+31   |
| ELP1   | 0.04761904762 | 0.04761904762 | 0.05555555556 | 0.05555555556 | 0.7          | 0.8571428571 |
| ELP2   | 0.04761904762 | 0.04761904762 | 0             | 0             | inf          | 4.7619E+31   |
| ELP3   | 0.04761904762 | 0.04761904762 | 0.1111111111  | 0.1111111111  | 0.325        | 0.4285714286 |
| ELP5   | 0             | 0             | 0.05555555556 | 0.05555555556 | 0            | 0            |
| ELP6   | 0.09523809524 | 0.09523809524 | 0             | 0             | inf          | 9.52381E+31  |
| LSPBP  | 0.09523809524 | 0.09523809524 | 0.1111111111  | 0.1111111111  | 0.6842105263 | 0.8571428571 |
| EMB    | 0.04761904762 | 0.04761904762 | 0.05555555556 | 0.05555555556 | 0.7          | 0.8571428571 |
| EMBP1  | 0.04761904762 | 0.04761904762 | 0.1111111111  | 0.1111111111  | 0.325        | 0.4285714286 |
| EMC1   | 0.04761904762 | 0.04761904762 | 0.1111111111  | 0.1111111111  | 0.325        | 0.4285714286 |
| MC1-AS | 0.04761904762 | 0.04761904762 | 0.1111111111  | 0.1111111111  | 0.325        | 0.4285714286 |
| EMC10  | 0.09523809524 | 0.09523809524 | 0.1111111111  | 0.1111111111  | 0.6842105263 | 0.8571428571 |
| EMC2   | 0.1904761905  | 0.1904761905  | 0.1111111111  | 0.1111111111  | 1.529411765  | 1.714285714  |
| EMC3   | 0.09523809524 | 0.09523809524 | 0             | 0             | inf          | 9.52381E+31  |
| MC3-AS | 0.09523809524 | 0.09523809524 | 0             | 0             | inf          | 9.52381E+31  |
| EMC6   | 0             | 0             | 0.1111111111  | 0.1111111111  | 0            | 0            |
| EMC8   | 0.04761904762 | 0.04761904762 | 0             | 0             | inf          | 4.7619E+31   |
| EMCN   | 0             | 0             | 0.05555555556 | 0.05555555556 | 0            | 0            |
| EME1   | 0.09523809524 | 0.09523809524 | 0             | 0             | inf          | 9.52381E+31  |
| EME2   | 0.09523809524 | 0.09523809524 | 0.2222222222  | 0.2222222222  | 0.2894736842 | 0.4285714286 |
| EMG1   | 0.04761904762 | 0.04761904762 | 0.1111111111  | 0.1111111111  | 0.325        | 0.4285714286 |
| EMID1  | 0.04761904762 | 0.04761904762 | 0.1111111111  | 0.1111111111  | 0.325        | 0.4285714286 |
| MILIN2 | 0.09523809524 | 0.09523809524 | 0             | 0             | inf          | 9.52381E+31  |
| MILIN3 | 0.1428571429  | 0.1428571429  | 0.1666666667  | 0.1666666667  | 0.6666666667 | 0.8571428571 |
| EML2   | 0.09523809524 | 0.09523809524 | 0.1111111111  | 0.1111111111  | 0.6842105263 | 0.8571428571 |
| ML2-AS | 0.09523809524 | 0.09523809524 | 0.1111111111  | 0.1111111111  | 0.6842105263 | 0.8571428571 |
| EML4   | 0             | 0             | 0.05555555556 | 0.05555555556 | 0            | 0            |
| EML6   | 0.04761904762 | 0.04761904762 | 0.05555555556 | 0.05555555556 | 0.7          | 0.8571428571 |
| EMP1   | 0.04761904762 | 0.04761904762 | 0.05555555556 | 0.05555555556 | 0.7          | 0.8571428571 |
| EMP2   | 0.04761904762 | 0.04761904762 | 0             | 0             | inf          | 4.7619E+31   |
| EMP3   | 0.09523809524 | 0.09523809524 | 0.1111111111  | 0.1111111111  | 0.6842105263 | 0.8571428571 |
| EMX1   | 0             | 0             | 0.05555555556 | 0.05555555556 | 0            | 0            |
| EMX2   | 0.2380952381  | 0.2380952381  | 0             | 0             | inf          | 2.38095E+32  |
| EMX2OS | 0.2380952381  | 0.2380952381  | 0             | 0             | inf          | 2.38095E+32  |
| EN1    | 0             | 0             | 0.05555555556 | 0.05555555556 | 0            | 0            |
| EN2    | 0.1428571429  | 0.1428571429  | 0.05555555556 | 0.05555555556 | 2.333333333  | 2.571428571  |
| ENAH   | 0.1428571429  | 0.1428571429  | 0.05555555556 | 0.05555555556 | 2.333333333  | 2.571428571  |
| ENAM   | 0.09523809524 | 0.09523809524 | 0.05555555556 | 0.05555555556 | 1.473684211  | 1.714285714  |
| ENC1   | 0.04761904762 | 0.04761904762 | 0.05555555556 | 0.05555555556 | 0.7          | 0.8571428571 |
| ENDOG  | 0.09523809524 | 0.09523809524 | 0.05555555556 | 0.05555555556 | 1.473684211  | 1.714285714  |
| ENDOU  | 0.04761904762 | 0.04761904762 | 0.05555555556 | 0.05555555556 | 0.7          | 0.8571428571 |
| ENDOV  | 0.04761904762 | 0.04761904762 | 0             | 0             | inf          | 4.7619E+31   |
| ENG    | 0.09523809524 | 0.09523809524 | 0.05555555556 | 0.05555555556 | 1.473684211  | 1.714285714  |
| ENGASH | 0.04761904762 | 0.04761904762 | 0             | 0             | inf          | 4.7619E+31   |
| ENHO   | 0.09523809524 | 0.09523809524 | 0.05555555556 | 0.05555555556 | 1.473684211  | 1.714285714  |
| ENKD1  | 0.1428571429  | 0.1428571429  | 0.05555555556 | 0.05555555556 | 2.333333333  | 2.571428571  |
| ENKUR  | 0.09523809524 | 0.09523809524 | 0.1111111111  | 0.1111111111  | 0.6842105263 | 0.8571428571 |
| ENO1   | 0             | 0             | 0.05555555556 | 0.05555555556 | 0            | 0            |

|          |               |               |               |               |              |              |
|----------|---------------|---------------|---------------|---------------|--------------|--------------|
| NO1-AS   | 0             | 0             | 0.05555555556 | 0.05555555556 | 0            | 0            |
| ENO2     | 0.04761904762 | 0.04761904762 | 0.11111111111 | 0.11111111111 | 0.325        | 0.4285714286 |
| ENO3     | 0             | 0             | 0.11111111111 | 0.11111111111 | 0            | 0            |
| ENO4     | 0.2380952381  | 0.2380952381  | 0             | 0             | inf          | 2.38095E+32  |
| ENOPH1   | 0             | 0             | 0.05555555556 | 0.05555555556 | 0            | 0            |
| ENOSF1   | 0.09523809524 | 0.09523809524 | 0             | 0             | inf          | 9.52381E+31  |
| ENPEP    | 0             | 0             | 0.05555555556 | 0.05555555556 | 0            | 0            |
| ENPP2    | 0.09523809524 | 0.09523809524 | 0.16666666667 | 0.16666666667 | 0.4210526316 | 0.5714285714 |
| ENPP4    | 0.04761904762 | 0.04761904762 | 0.05555555556 | 0.05555555556 | 0.7          | 0.8571428571 |
| ENPP5    | 0.04761904762 | 0.04761904762 | 0.05555555556 | 0.05555555556 | 0.7          | 0.8571428571 |
| ENPP6    | 0             | 0             | 0.05555555556 | 0.05555555556 | 0            | 0            |
| ENPP7    | 0.04761904762 | 0.04761904762 | 0             | 0             | inf          | 4.7619E+31   |
| NPP7P1   | 0.1428571429  | 0.1428571429  | 0             | 0             | inf          | 1.42857E+32  |
| ENSA     | 0.1904761905  | 0.1904761905  | 0.05555555556 | 0.05555555556 | 3.294117647  | 3.428571429  |
| ENTHD1   | 0             | 0             | 0.11111111111 | 0.11111111111 | 0            | 0            |
| ENTPD1   | 0.1428571429  | 0.1428571429  | 0             | 0             | inf          | 1.42857E+32  |
| TPD1-A   | 0.1428571429  | 0.1428571429  | 0             | 0             | inf          | 1.42857E+32  |
| ENTPD2   | 0.1428571429  | 0.1428571429  | 0.05555555556 | 0.05555555556 | 2.333333333  | 2.571428571  |
| ENTPD3   | 0.04761904762 | 0.04761904762 | 0             | 0             | inf          | 4.7619E+31   |
| TPD3-A   | 0.04761904762 | 0.04761904762 | 0             | 0             | inf          | 4.7619E+31   |
| ENTPD4   | 0.04761904762 | 0.04761904762 | 0.11111111111 | 0.11111111111 | 0.325        | 0.4285714286 |
| ENTPD5   | 0.09523809524 | 0.09523809524 | 0             | 0             | inf          | 9.52381E+31  |
| ENTPD6   | 0.1904761905  | 0.1904761905  | 0.05555555556 | 0.05555555556 | 3.294117647  | 3.428571429  |
| ENTPD7   | 0.1428571429  | 0.1428571429  | 0             | 0             | inf          | 1.42857E+32  |
| ENTPD8   | 0.09523809524 | 0.09523809524 | 0             | 0             | inf          | 9.52381E+31  |
| ENTR1    | 0.1428571429  | 0.1428571429  | 0.05555555556 | 0.05555555556 | 2.333333333  | 2.571428571  |
| ENY2     | 0.1904761905  | 0.1904761905  | 0.11111111111 | 0.11111111111 | 1.529411765  | 1.714285714  |
| EOGT     | 0.04761904762 | 0.04761904762 | 0             | 0             | inf          | 4.7619E+31   |
| EOMES    | 0.04761904762 | 0.04761904762 | 0             | 0             | inf          | 4.7619E+31   |
| EP300    | 0             | 0             | 0.11111111111 | 0.11111111111 | 0            | 0            |
| P300-AS  | 0             | 0             | 0.11111111111 | 0.11111111111 | 0            | 0            |
| EP400    | 0.09523809524 | 0.09523809524 | 0.05555555556 | 0.05555555556 | 1.473684211  | 1.714285714  |
| EP400P1  | 0.09523809524 | 0.09523809524 | 0.05555555556 | 0.05555555556 | 1.473684211  | 1.714285714  |
| EPAS1    | 0             | 0             | 0.05555555556 | 0.05555555556 | 0            | 0            |
| EPB41    | 0.04761904762 | 0.04761904762 | 0.11111111111 | 0.11111111111 | 0.325        | 0.4285714286 |
| EPB41L1  | 0.09523809524 | 0.09523809524 | 0.11111111111 | 0.11111111111 | 0.6842105263 | 0.8571428571 |
| EPB41L3  | 0.09523809524 | 0.09523809524 | 0             | 0             | inf          | 9.52381E+31  |
| PB41L4   | 0.04761904762 | 0.04761904762 | 0             | 0             | inf          | 4.7619E+31   |
| B41L4A-  | 0.04761904762 | 0.04761904762 | 0             | 0             | inf          | 4.7619E+31   |
| B41L4A-  | 0.04761904762 | 0.04761904762 | 0             | 0             | inf          | 4.7619E+31   |
| PB41L4   | 0.04761904762 | 0.04761904762 | 0.05555555556 | 0.05555555556 | 0.7          | 0.8571428571 |
| EPB41L5  | 0             | 0             | 0.05555555556 | 0.05555555556 | 0            | 0            |
| EPC1     | 0.09523809524 | 0.09523809524 | 0.22222222222 | 0.22222222222 | 0.2894736842 | 0.4285714286 |
| EPC2     | 0             | 0             | 0.05555555556 | 0.05555555556 | 0            | 0            |
| EPCAM    | 0             | 0             | 0.05555555556 | 0.05555555556 | 0            | 0            |
| P-CAM-D  | 0             | 0             | 0.05555555556 | 0.05555555556 | 0            | 0            |
| EPDR1    | 0.04761904762 | 0.04761904762 | 0.22222222222 | 0.22222222222 | 0.1375       | 0.2142857143 |
| EPG5     | 0.04761904762 | 0.04761904762 | 0.05555555556 | 0.05555555556 | 0.7          | 0.8571428571 |
| EPGN     | 0.09523809524 | 0.09523809524 | 0.05555555556 | 0.05555555556 | 1.473684211  | 1.714285714  |
| EPHA1    | 0.04761904762 | 0.04761904762 | 0.05555555556 | 0.05555555556 | 0.7          | 0.8571428571 |
| P-HA1-AS | 0.04761904762 | 0.04761904762 | 0.05555555556 | 0.05555555556 | 0.7          | 0.8571428571 |

|         |               |               |               |               |              |              |
|---------|---------------|---------------|---------------|---------------|--------------|--------------|
| EPHA10  | 0.04761904762 | 0.04761904762 | 0.05555555556 | 0.05555555556 | 0.7          | 0.8571428571 |
| EPHA2   | 0.04761904762 | 0.04761904762 | 0.11111111111 | 0.11111111111 | 0.325        | 0.4285714286 |
| EPHA3   | 0.04761904762 | 0.04761904762 | 0             | 0             | inf          | 4.7619E+31   |
| EPHA4   | 0             | 0             | 0.05555555556 | 0.05555555556 | 0            | 0            |
| EPHA5   | 0.04761904762 | 0.04761904762 | 0.05555555556 | 0.05555555556 | 0.7          | 0.8571428571 |
| PHA5-AS | 0.04761904762 | 0.04761904762 | 0.05555555556 | 0.05555555556 | 0.7          | 0.8571428571 |
| EPHA6   | 0.04761904762 | 0.04761904762 | 0.11111111111 | 0.11111111111 | 0.325        | 0.4285714286 |
| EPHA7   | 0             | 0             | 0             | 0             |              | 0.00001      |
| EPHA8   | 0.04761904762 | 0.04761904762 | 0.11111111111 | 0.11111111111 | 0.325        | 0.4285714286 |
| EPHB1   | 0.1428571429  | 0.1428571429  | 0             | 0             | inf          | 1.42857E+32  |
| EPHB2   | 0.04761904762 | 0.04761904762 | 0.11111111111 | 0.11111111111 | 0.325        | 0.4285714286 |
| EPHB3   | 0.1428571429  | 0.1428571429  | 0.05555555556 | 0.05555555556 | 2.3333333333 | 2.571428571  |
| EPHB4   | 0.04761904762 | 0.04761904762 | 0.05555555556 | 0.05555555556 | 0.7          | 0.8571428571 |
| EPHB6   | 0.04761904762 | 0.04761904762 | 0.05555555556 | 0.05555555556 | 0.7          | 0.8571428571 |
| EPHX1   | 0.1428571429  | 0.1428571429  | 0.05555555556 | 0.05555555556 | 2.3333333333 | 2.571428571  |
| EPHX2   | 0.04761904762 | 0.04761904762 | 0.11111111111 | 0.11111111111 | 0.325        | 0.4285714286 |
| EPHX3   | 0.1428571429  | 0.1428571429  | 0.11111111111 | 0.11111111111 | 1.0833333333 | 1.285714286  |
| EPHX4   | 0.04761904762 | 0.04761904762 | 0.05555555556 | 0.05555555556 | 0.7          | 0.8571428571 |
| PM2AIP  | 0.04761904762 | 0.04761904762 | 0             | 0             | inf          | 4.7619E+31   |
| EPN1    | 0.09523809524 | 0.09523809524 | 0.05555555556 | 0.05555555556 | 1.473684211  | 1.714285714  |
| EPN2    | 0.04761904762 | 0.04761904762 | 0.11111111111 | 0.11111111111 | 0.325        | 0.4285714286 |
| PN2-AS  | 0.04761904762 | 0.04761904762 | 0.11111111111 | 0.11111111111 | 0.325        | 0.4285714286 |
| PN2-IT  | 0.04761904762 | 0.04761904762 | 0.11111111111 | 0.11111111111 | 0.325        | 0.4285714286 |
| EPN3    | 0.09523809524 | 0.09523809524 | 0             | 0             | inf          | 9.52381E+31  |
| EPO     | 0.04761904762 | 0.04761904762 | 0.05555555556 | 0.05555555556 | 0.7          | 0.8571428571 |
| EPOP    | 0.04761904762 | 0.04761904762 | 0             | 0             | inf          | 4.7619E+31   |
| EPPIN   | 0.1428571429  | 0.1428571429  | 0.16666666667 | 0.16666666667 | 0.6666666667 | 0.8571428571 |
| IN-WFI  | 0.1428571429  | 0.1428571429  | 0.16666666667 | 0.16666666667 | 0.6666666667 | 0.8571428571 |
| EPPK1   | 0.04761904762 | 0.04761904762 | 0.16666666667 | 0.16666666667 | 0.2          | 0.2857142857 |
| EPRS    | 0.1428571429  | 0.1428571429  | 0.05555555556 | 0.05555555556 | 2.3333333333 | 2.571428571  |
| EPS15   | 0.04761904762 | 0.04761904762 | 0.05555555556 | 0.05555555556 | 0.7          | 0.8571428571 |
| EPS15L1 | 0.1428571429  | 0.1428571429  | 0.11111111111 | 0.11111111111 | 1.0833333333 | 1.285714286  |
| EPS8    | 0.04761904762 | 0.04761904762 | 0.11111111111 | 0.11111111111 | 0.325        | 0.4285714286 |
| EPS8L1  | 0.09523809524 | 0.09523809524 | 0.05555555556 | 0.05555555556 | 1.473684211  | 1.714285714  |
| EPS8L2  | 0.04761904762 | 0.04761904762 | 0             | 0             | inf          | 4.7619E+31   |
| EPS8L3  | 0.04761904762 | 0.04761904762 | 0.05555555556 | 0.05555555556 | 0.7          | 0.8571428571 |
| EPX     | 0.09523809524 | 0.09523809524 | 0             | 0             | inf          | 9.52381E+31  |
| EPYC    | 0.04761904762 | 0.04761904762 | 0.05555555556 | 0.05555555556 | 0.7          | 0.8571428571 |
| EQTN    | 0.04761904762 | 0.04761904762 | 0.05555555556 | 0.05555555556 | 0.7          | 0.8571428571 |
| ERAL1   | 0.04761904762 | 0.04761904762 | 0.05555555556 | 0.05555555556 | 0.7          | 0.8571428571 |
| ERAP1   | 0.04761904762 | 0.04761904762 | 0             | 0             | inf          | 4.7619E+31   |
| ERAP2   | 0.04761904762 | 0.04761904762 | 0             | 0             | inf          | 4.7619E+31   |
| ERBB2   | 0.09523809524 | 0.09523809524 | 0             | 0             | inf          | 9.52381E+31  |
| ERBB3   | 0.09523809524 | 0.09523809524 | 0.05555555556 | 0.05555555556 | 1.473684211  | 1.714285714  |
| ERBB4   | 0             | 0             | 0.05555555556 | 0.05555555556 | 0            | 0            |
| ERBIN   | 0.04761904762 | 0.04761904762 | 0             | 0             | inf          | 4.7619E+31   |
| ERC1    | 0.04761904762 | 0.04761904762 | 0.11111111111 | 0.11111111111 | 0.325        | 0.4285714286 |
| ERC2    | 0.04761904762 | 0.04761904762 | 0             | 0             | inf          | 4.7619E+31   |
| RC2-IT  | 0.04761904762 | 0.04761904762 | 0             | 0             | inf          | 4.7619E+31   |
| ERCC1   | 0.09523809524 | 0.09523809524 | 0.11111111111 | 0.11111111111 | 0.6842105263 | 0.8571428571 |
| ERCC2   | 0.09523809524 | 0.09523809524 | 0.11111111111 | 0.11111111111 | 0.6842105263 | 0.8571428571 |

|            |               |               |               |               |              |              |
|------------|---------------|---------------|---------------|---------------|--------------|--------------|
| ERCC3      | 0             | 0             | 0.05555555556 | 0.05555555556 | 0            | 0            |
| ERCC4      | 0.04761904762 | 0.04761904762 | 0             | 0             | inf          | 4.7619E+31   |
| ERCC6      | 0.09523809524 | 0.09523809524 | 0.05555555556 | 0.05555555556 | 1.473684211  | 1.714285714  |
| RCC6L      | 0.04761904762 | 0.04761904762 | 0.05555555556 | 0.05555555556 | 0.7          | 0.8571428571 |
| ERCC8      | 0.04761904762 | 0.04761904762 | 0             | 0             | inf          | 4.7619E+31   |
| EREG       | 0.09523809524 | 0.09523809524 | 0.05555555556 | 0.05555555556 | 1.473684211  | 1.714285714  |
| ERF        | 0.04761904762 | 0.04761904762 | 0.05555555556 | 0.05555555556 | 0.7          | 0.8571428571 |
| ERFE       | 0             | 0             | 0.05555555556 | 0.05555555556 | 0            | 0            |
| ERG        | 0.04761904762 | 0.04761904762 | 0.11111111111 | 0.11111111111 | 0.325        | 0.4285714286 |
| ERGIC1     | 0             | 0             | 0.05555555556 | 0.05555555556 | 0            | 0            |
| ERGIC2     | 0.04761904762 | 0.04761904762 | 0.05555555556 | 0.05555555556 | 0.7          | 0.8571428571 |
| ERGIC3     | 0.09523809524 | 0.09523809524 | 0.11111111111 | 0.11111111111 | 0.6842105263 | 0.8571428571 |
| ERII       | 0.09523809524 | 0.09523809524 | 0.11111111111 | 0.11111111111 | 0.6842105263 | 0.8571428571 |
| ERI2       | 0.04761904762 | 0.04761904762 | 0             | 0             | inf          | 4.7619E+31   |
| ERI3       | 0.04761904762 | 0.04761904762 | 0.05555555556 | 0.05555555556 | 0.7          | 0.8571428571 |
| ERI3-IT1   | 0.04761904762 | 0.04761904762 | 0.05555555556 | 0.05555555556 | 0.7          | 0.8571428571 |
| ERICH1     | 0.09523809524 | 0.09523809524 | 0.11111111111 | 0.11111111111 | 0.6842105263 | 0.8571428571 |
| ERICH2     | 0             | 0             | 0.05555555556 | 0.05555555556 | 0            | 0            |
| ERICH3     | 0.04761904762 | 0.04761904762 | 0.05555555556 | 0.05555555556 | 0.7          | 0.8571428571 |
| ERICH3-A   | 0.04761904762 | 0.04761904762 | 0.05555555556 | 0.05555555556 | 0.7          | 0.8571428571 |
| ERICH4     | 0.04761904762 | 0.04761904762 | 0.05555555556 | 0.05555555556 | 0.7          | 0.8571428571 |
| ERICH5     | 0.1904761905  | 0.1904761905  | 0.11111111111 | 0.11111111111 | 1.529411765  | 1.714285714  |
| ERICH6     | 0.1904761905  | 0.1904761905  | 0.11111111111 | 0.11111111111 | 1.529411765  | 1.714285714  |
| ERICH6-A   | 0.1904761905  | 0.1904761905  | 0.11111111111 | 0.11111111111 | 1.529411765  | 1.714285714  |
| ERLEC1     | 0.04761904762 | 0.04761904762 | 0.05555555556 | 0.05555555556 | 0.7          | 0.8571428571 |
| ERLIN1     | 0.1428571429  | 0.1428571429  | 0             | 0             | inf          | 1.42857E+32  |
| ERLIN2     | 0.04761904762 | 0.04761904762 | 0.11111111111 | 0.11111111111 | 0.325        | 0.4285714286 |
| ERLNC1     | 0.2380952381  | 0.2380952381  | 0             | 0             | inf          | 2.38095E+32  |
| ERMAP      | 0.04761904762 | 0.04761904762 | 0.05555555556 | 0.05555555556 | 0.7          | 0.8571428571 |
| ERMN       | 0             | 0             | 0.05555555556 | 0.05555555556 | 0            | 0            |
| ERMP1      | 0.04761904762 | 0.04761904762 | 0.05555555556 | 0.05555555556 | 0.7          | 0.8571428571 |
| ERN1       | 0.04761904762 | 0.04761904762 | 0             | 0             | inf          | 4.7619E+31   |
| ERN2       | 0.04761904762 | 0.04761904762 | 0             | 0             | inf          | 4.7619E+31   |
| ERO1A      | 0.04761904762 | 0.04761904762 | 0             | 0             | inf          | 4.7619E+31   |
| ERO1B      | 0.1428571429  | 0.1428571429  | 0             | 0             | inf          | 1.42857E+32  |
| ERP27      | 0.04761904762 | 0.04761904762 | 0.11111111111 | 0.11111111111 | 0.325        | 0.4285714286 |
| ERP29      | 0             | 0             | 0.11111111111 | 0.11111111111 | 0            | 0            |
| ERP44      | 0.04761904762 | 0.04761904762 | 0             | 0             | inf          | 4.7619E+31   |
| ERRFI1     | 0             | 0             | 0.05555555556 | 0.05555555556 | 0            | 0            |
| ERV3-1     | 0.04761904762 | 0.04761904762 | 0.11111111111 | 0.11111111111 | 0.325        | 0.4285714286 |
| ERV3-1-ZN1 | 0.04761904762 | 0.04761904762 | 0.11111111111 | 0.11111111111 | 0.325        | 0.4285714286 |
| RVFRD      | 0.04761904762 | 0.04761904762 | 0             | 0             | inf          | 4.7619E+31   |
| RVH48      | 0.04761904762 | 0.04761904762 | 0.16666666667 | 0.16666666667 | 0.2          | 0.2857142857 |
| RVK13      | 0.04761904762 | 0.04761904762 | 0.11111111111 | 0.11111111111 | 0.325        | 0.4285714286 |
| RVK3-1     | 0.1428571429  | 0.1428571429  | 0.05555555556 | 0.05555555556 | 2.333333333  | 2.571428571  |
| VMER3      | 0.2380952381  | 0.2380952381  | 0.05555555556 | 0.05555555556 | 4.375        | 4.285714286  |
| ERVV-1     | 0.09523809524 | 0.09523809524 | 0.05555555556 | 0.05555555556 | 1.473684211  | 1.714285714  |
| ERVV-2     | 0.09523809524 | 0.09523809524 | 0.05555555556 | 0.05555555556 | 1.473684211  | 1.714285714  |
| ERVW-1     | 0.04761904762 | 0.04761904762 | 0.11111111111 | 0.11111111111 | 0.325        | 0.4285714286 |
| ESCO1      | 0.04761904762 | 0.04761904762 | 0.11111111111 | 0.11111111111 | 0.325        | 0.4285714286 |
| ESCO2      | 0.04761904762 | 0.04761904762 | 0.11111111111 | 0.11111111111 | 0.325        | 0.4285714286 |

|                |               |               |              |              |             |              |
|----------------|---------------|---------------|--------------|--------------|-------------|--------------|
| <b>ESF1</b>    | 0.1904761905  | 0.1904761905  | 0.1111111111 | 0.1111111111 | 1.529411765 | 1.714285714  |
| <b>ESM1</b>    | 0.04761904762 | 0.04761904762 | 0.0555555556 | 0.0555555556 | 0.7         | 0.8571428571 |
| <b>ESPL1</b>   | 0.04761904762 | 0.04761904762 | 0.0555555556 | 0.0555555556 | 0.7         | 0.8571428571 |
| <b>ESPN</b>    | 0             | 0             | 0.0555555556 | 0.0555555556 | 0           | 0            |
| <b>ESPNL</b>   | 0             | 0             | 0.0555555556 | 0.0555555556 | 0           | 0            |
| <b>ESPNP</b>   | 0.04761904762 | 0.04761904762 | 0.1111111111 | 0.1111111111 | 0.325       | 0.4285714286 |
| <b>ESR2</b>    | 0.09523809524 | 0.09523809524 | 0            | 0            | inf         | 9.52381E+31  |
| <b>ESRG</b>    | 0.04761904762 | 0.04761904762 | 0            | 0            | inf         | 4.7619E+31   |
| <b>ESRP1</b>   | 0.1904761905  | 0.1904761905  | 0.1111111111 | 0.1111111111 | 1.529411765 | 1.714285714  |
| <b>ESRP2</b>   | 0.1428571429  | 0.1428571429  | 0.0555555556 | 0.0555555556 | 2.333333333 | 2.571428571  |
| <b>ESRRG</b>   | 0.1428571429  | 0.1428571429  | 0            | 0            | inf         | 1.42857E+32  |
| <b>ESS2</b>    | 0.04761904762 | 0.04761904762 | 0.0555555556 | 0.0555555556 | 0.7         | 0.8571428571 |
| <b>ESYT1</b>   | 0.09523809524 | 0.09523809524 | 0.0555555556 | 0.0555555556 | 1.473684211 | 1.714285714  |
| <b>ESYT2</b>   | 0.1428571429  | 0.1428571429  | 0.0555555556 | 0.0555555556 | 2.333333333 | 2.571428571  |
| <b>ESYT3</b>   | 0.1428571429  | 0.1428571429  | 0.0555555556 | 0.0555555556 | 2.333333333 | 2.571428571  |
| <b>ETAA1</b>   | 0             | 0             | 0.0555555556 | 0.0555555556 | 0           | 0            |
| <b>ETF1</b>    | 0.04761904762 | 0.04761904762 | 0            | 0            | inf         | 4.7619E+31   |
| <b>ETFA</b>    | 0.04761904762 | 0.04761904762 | 0.0555555556 | 0.0555555556 | 0.7         | 0.8571428571 |
| <b>IFBKM</b>   | 0.1428571429  | 0.1428571429  | 0.1111111111 | 0.1111111111 | 1.083333333 | 1.285714286  |
| <b>ETFDH</b>   | 0             | 0             | 0.0555555556 | 0.0555555556 | 0           | 0            |
| <b>ETFRF1</b>  | 0.04761904762 | 0.04761904762 | 0.0555555556 | 0.0555555556 | 0.7         | 0.8571428571 |
| <b>ETHE1</b>   | 0.09523809524 | 0.09523809524 | 0.0555555556 | 0.0555555556 | 1.473684211 | 1.714285714  |
| <b>ETNK1</b>   | 0.04761904762 | 0.04761904762 | 0.0555555556 | 0.0555555556 | 0.7         | 0.8571428571 |
| <b>ETNK2</b>   | 0.2380952381  | 0.2380952381  | 0            | 0            | inf         | 2.38095E+32  |
| <b>ETNPPI</b>  | 0             | 0             | 0.0555555556 | 0.0555555556 | 0           | 0            |
| <b>ETS2</b>    | 0.04761904762 | 0.04761904762 | 0.1111111111 | 0.1111111111 | 0.325       | 0.4285714286 |
| <b>ETV1</b>    | 0.04761904762 | 0.04761904762 | 0.2222222222 | 0.2222222222 | 0.1375      | 0.2142857143 |
| <b>ETV2</b>    | 0.04761904762 | 0.04761904762 | 0.0555555556 | 0.0555555556 | 0.7         | 0.8571428571 |
| <b>ETV3</b>    | 0.1428571429  | 0.1428571429  | 0.0555555556 | 0.0555555556 | 2.333333333 | 2.571428571  |
| <b>ETV3L</b>   | 0.1428571429  | 0.1428571429  | 0.0555555556 | 0.0555555556 | 2.333333333 | 2.571428571  |
| <b>ETV4</b>    | 0.04761904762 | 0.04761904762 | 0            | 0            | inf         | 4.7619E+31   |
| <b>ETV5</b>    | 0.09523809524 | 0.09523809524 | 0.0555555556 | 0.0555555556 | 1.473684211 | 1.714285714  |
| <b>ETV6</b>    | 0.04761904762 | 0.04761904762 | 0.1111111111 | 0.1111111111 | 0.325       | 0.4285714286 |
| <b>ETV7</b>    | 0.04761904762 | 0.04761904762 | 0.0555555556 | 0.0555555556 | 0.7         | 0.8571428571 |
| <b>EVA1A</b>   | 0             | 0             | 0.0555555556 | 0.0555555556 | 0           | 0            |
| <b>EVA1B</b>   | 0.04761904762 | 0.04761904762 | 0.0555555556 | 0.0555555556 | 0.7         | 0.8571428571 |
| <b>EVA1C</b>   | 0.04761904762 | 0.04761904762 | 0.1111111111 | 0.1111111111 | 0.325       | 0.4285714286 |
| <b>EVI2A</b>   | 0             | 0             | 0            | 0            |             | 0.00001      |
| <b>EVI2B</b>   | 0             | 0             | 0            | 0            |             | 0.00001      |
| <b>EVI5</b>    | 0.04761904762 | 0.04761904762 | 0.0555555556 | 0.0555555556 | 0.7         | 0.8571428571 |
| <b>EVI5L</b>   | 0.1428571429  | 0.1428571429  | 0.0555555556 | 0.0555555556 | 2.333333333 | 2.571428571  |
| <b>EVPL</b>    | 0.04761904762 | 0.04761904762 | 0            | 0            | inf         | 4.7619E+31   |
| <b>EVPLL</b>   | 0.04761904762 | 0.04761904762 | 0.1111111111 | 0.1111111111 | 0.325       | 0.4285714286 |
| <b>EVX1</b>    | 0.04761904762 | 0.04761904762 | 0.2222222222 | 0.2222222222 | 0.1375      | 0.2142857143 |
| <b>EVX1-AS</b> | 0.04761904762 | 0.04761904762 | 0.2222222222 | 0.2222222222 | 0.1375      | 0.2142857143 |
| <b>EVX2</b>    | 0             | 0             | 0.1111111111 | 0.1111111111 | 0           | 0            |
| <b>EWSAT</b>   | 0.04761904762 | 0.04761904762 | 0.0555555556 | 0.0555555556 | 0.7         | 0.8571428571 |
| <b>EWSR1</b>   | 0.04761904762 | 0.04761904762 | 0.1111111111 | 0.1111111111 | 0.325       | 0.4285714286 |
| <b>EXD3</b>    | 0.1428571429  | 0.1428571429  | 0.0555555556 | 0.0555555556 | 2.333333333 | 2.571428571  |
| <b>EXO1</b>    | 0.1428571429  | 0.1428571429  | 0            | 0            | inf         | 1.42857E+32  |
| <b>EXO5</b>    | 0.04761904762 | 0.04761904762 | 0.0555555556 | 0.0555555556 | 0.7         | 0.8571428571 |



|         |               |               |              |              |              |              |
|---------|---------------|---------------|--------------|--------------|--------------|--------------|
| EXOC1   | 0.1904761905  | 0.1904761905  | 0.0555555556 | 0.0555555556 | 3.294117647  | 3.428571429  |
| EXOC1L  | 0.1904761905  | 0.1904761905  | 0.0555555556 | 0.0555555556 | 3.294117647  | 3.428571429  |
| EXOC3   | 0             | 0             | 0.0555555556 | 0.0555555556 | 0            | 0            |
| XOC3-A  | 0             | 0             | 0.0555555556 | 0.0555555556 | 0            | 0            |
| XOC3L   | 0.1428571429  | 0.1428571429  | 0.0555555556 | 0.0555555556 | 2.333333333  | 2.571428571  |
| XOC3L0  | 0.09523809524 | 0.09523809524 | 0.1111111111 | 0.1111111111 | 0.6842105263 | 0.8571428571 |
| EXOC4   | 0.04761904762 | 0.04761904762 | 0.0555555556 | 0.0555555556 | 0.7          | 0.8571428571 |
| EXOC5   | 0.04761904762 | 0.04761904762 | 0            | 0            | inf          | 4.7619E+31   |
| EXOC6   | 0.1428571429  | 0.1428571429  | 0.1111111111 | 0.1111111111 | 1.083333333  | 1.285714286  |
| EXOC6B  | 0             | 0             | 0.0555555556 | 0.0555555556 | 0            | 0            |
| EXOC7   | 0.04761904762 | 0.04761904762 | 0            | 0            | inf          | 4.7619E+31   |
| EXOC8   | 0.1428571429  | 0.1428571429  | 0            | 0            | inf          | 1.42857E+32  |
| EXOG    | 0.04761904762 | 0.04761904762 | 0            | 0            | inf          | 4.7619E+31   |
| EXOSC1  | 0.1428571429  | 0.1428571429  | 0            | 0            | inf          | 1.42857E+32  |
| XOSC10  | 0.04761904762 | 0.04761904762 | 0.1111111111 | 0.1111111111 | 0.325        | 0.4285714286 |
| OSC10-A | 0.04761904762 | 0.04761904762 | 0.1111111111 | 0.1111111111 | 0.325        | 0.4285714286 |
| EXOSC2  | 0.09523809524 | 0.09523809524 | 0.0555555556 | 0.0555555556 | 1.473684211  | 1.714285714  |
| EXOSC3  | 0.09523809524 | 0.09523809524 | 0.0555555556 | 0.0555555556 | 1.473684211  | 1.714285714  |
| EXOSC4  | 0.04761904762 | 0.04761904762 | 0.1666666667 | 0.1666666667 | 0.2          | 0.2857142857 |
| EXOSC5  | 0.04761904762 | 0.04761904762 | 0.0555555556 | 0.0555555556 | 0.7          | 0.8571428571 |
| EXOSC6  | 0.1428571429  | 0.1428571429  | 0.0555555556 | 0.0555555556 | 2.333333333  | 2.571428571  |
| EXOSC9  | 0             | 0             | 0.0555555556 | 0.0555555556 | 0            | 0            |
| EXT1    | 0.1428571429  | 0.1428571429  | 0.1666666667 | 0.1666666667 | 0.6666666667 | 0.8571428571 |
| EXTL1   | 0.04761904762 | 0.04761904762 | 0.1111111111 | 0.1111111111 | 0.325        | 0.4285714286 |
| EXTL2   | 0.04761904762 | 0.04761904762 | 0.0555555556 | 0.0555555556 | 0.7          | 0.8571428571 |
| EXTL3   | 0.04761904762 | 0.04761904762 | 0.1111111111 | 0.1111111111 | 0.325        | 0.4285714286 |
| KTL3-AS | 0.04761904762 | 0.04761904762 | 0.1111111111 | 0.1111111111 | 0.325        | 0.4285714286 |
| EYA1    | 0.1904761905  | 0.1904761905  | 0.1666666667 | 0.1666666667 | 0.9411764706 | 1.142857143  |
| EYA2    | 0.1428571429  | 0.1428571429  | 0.1666666667 | 0.1666666667 | 0.6666666667 | 0.8571428571 |
| EYA3    | 0.04761904762 | 0.04761904762 | 0.1111111111 | 0.1111111111 | 0.325        | 0.4285714286 |
| EZH1    | 0.04761904762 | 0.04761904762 | 0            | 0            | inf          | 4.7619E+31   |
| EZH2    | 0.09523809524 | 0.09523809524 | 0.0555555556 | 0.0555555556 | 1.473684211  | 1.714285714  |
| F11     | 0             | 0             | 0.0555555556 | 0.0555555556 | 0            | 0            |
| F11-AS1 | 0             | 0             | 0.0555555556 | 0.0555555556 | 0            | 0            |
| F11R    | 0.1428571429  | 0.1428571429  | 0            | 0            | inf          | 1.42857E+32  |
| F12     | 0.09523809524 | 0.09523809524 | 0.0555555556 | 0.0555555556 | 1.473684211  | 1.714285714  |
| F13B    | 0.1428571429  | 0.1428571429  | 0            | 0            | inf          | 1.42857E+32  |
| F2      | 0             | 0             | 0.0555555556 | 0.0555555556 | 0            | 0            |
| F2R     | 0.04761904762 | 0.04761904762 | 0            | 0            | inf          | 4.7619E+31   |
| F2RL1   | 0.04761904762 | 0.04761904762 | 0            | 0            | inf          | 4.7619E+31   |
| F2RL2   | 0.04761904762 | 0.04761904762 | 0            | 0            | inf          | 4.7619E+31   |
| F2RL3   | 0.1428571429  | 0.1428571429  | 0.1111111111 | 0.1111111111 | 1.083333333  | 1.285714286  |
| F3      | 0.04761904762 | 0.04761904762 | 0.0555555556 | 0.0555555556 | 0.7          | 0.8571428571 |
| F5      | 0.1428571429  | 0.1428571429  | 0            | 0            | inf          | 1.42857E+32  |
| FA2H    | 0.04761904762 | 0.04761904762 | 0            | 0            | inf          | 4.7619E+31   |
| FAAH    | 0.04761904762 | 0.04761904762 | 0.0555555556 | 0.0555555556 | 0.7          | 0.8571428571 |
| FAAHP1  | 0.04761904762 | 0.04761904762 | 0.0555555556 | 0.0555555556 | 0.7          | 0.8571428571 |
| FAAP10  | 0.04761904762 | 0.04761904762 | 0            | 0            | inf          | 4.7619E+31   |
| FAAP20  | 0             | 0             | 0.1111111111 | 0.1111111111 | 0            | 0            |
| FAAP24  | 0.04761904762 | 0.04761904762 | 0.0555555556 | 0.0555555556 | 0.7          | 0.8571428571 |
| FABP1   | 0             | 0             | 0.0555555556 | 0.0555555556 | 0            | 0            |

|         |               |               |              |              |              |              |
|---------|---------------|---------------|--------------|--------------|--------------|--------------|
| FABP12  | 0.1428571429  | 0.1428571429  | 0.1111111111 | 0.1111111111 | 1.083333333  | 1.285714286  |
| FABP2   | 0             | 0             | 0.0555555556 | 0.0555555556 | 0            | 0            |
| FABP3   | 0.04761904762 | 0.04761904762 | 0.1111111111 | 0.1111111111 | 0.325        | 0.4285714286 |
| FABP4   | 0.1428571429  | 0.1428571429  | 0.1111111111 | 0.1111111111 | 1.083333333  | 1.285714286  |
| FABP5   | 0.1428571429  | 0.1428571429  | 0.1111111111 | 0.1111111111 | 1.083333333  | 1.285714286  |
| FABP5P  | 0.09523809524 | 0.09523809524 | 0.0555555556 | 0.0555555556 | 1.473684211  | 1.714285714  |
| FABP6   | 0.04761904762 | 0.04761904762 | 0.0555555556 | 0.0555555556 | 0.7          | 0.8571428571 |
| FABP9   | 0.1428571429  | 0.1428571429  | 0.1111111111 | 0.1111111111 | 1.083333333  | 1.285714286  |
| FADS6   | 0.04761904762 | 0.04761904762 | 0            | 0            | inf          | 4.7619E+31   |
| FAF1    | 0.04761904762 | 0.04761904762 | 0.0555555556 | 0.0555555556 | 0.7          | 0.8571428571 |
| FAF2    | 0.09523809524 | 0.09523809524 | 0.0555555556 | 0.0555555556 | 1.473684211  | 1.714285714  |
| FAH     | 0.04761904762 | 0.04761904762 | 0.0555555556 | 0.0555555556 | 0.7          | 0.8571428571 |
| FAHD1   | 0.09523809524 | 0.09523809524 | 0.2222222222 | 0.2222222222 | 0.2894736842 | 0.4285714286 |
| FAHD2A  | 0             | 0             | 0.1111111111 | 0.1111111111 | 0            | 0            |
| FAHD2B  | 0             | 0             | 0.1111111111 | 0.1111111111 | 0            | 0            |
| AHD2C   | 0             | 0             | 0.1111111111 | 0.1111111111 | 0            | 0            |
| FAIM    | 0.1428571429  | 0.1428571429  | 0.0555555556 | 0.0555555556 | 2.333333333  | 2.571428571  |
| FAIM2   | 0.04761904762 | 0.04761904762 | 0.0555555556 | 0.0555555556 | 0.7          | 0.8571428571 |
| FALEC   | 0.1904761905  | 0.1904761905  | 0.0555555556 | 0.0555555556 | 3.294117647  | 3.428571429  |
| AM102A  | 0.09523809524 | 0.09523809524 | 0.0555555556 | 0.0555555556 | 1.473684211  | 1.714285714  |
| AM102I  | 0.04761904762 | 0.04761904762 | 0.0555555556 | 0.0555555556 | 0.7          | 0.8571428571 |
| AM104A  | 0.04761904762 | 0.04761904762 | 0            | 0            | inf          | 4.7619E+31   |
| AM106A  | 0.04761904762 | 0.04761904762 | 0.1111111111 | 0.1111111111 | 0.325        | 0.4285714286 |
| AM106I  | 0.09523809524 | 0.09523809524 | 0.0555555556 | 0.0555555556 | 1.473684211  | 1.714285714  |
| AM106C  | 0.04761904762 | 0.04761904762 | 0.0555555556 | 0.0555555556 | 0.7          | 0.8571428571 |
| AM107A  | 0.04761904762 | 0.04761904762 | 0            | 0            | inf          | 4.7619E+31   |
| AM107I  | 0.09523809524 | 0.09523809524 | 0.1111111111 | 0.1111111111 | 0.6842105263 | 0.8571428571 |
| AM110A  | 0.1904761905  | 0.1904761905  | 0.0555555556 | 0.0555555556 | 3.294117647  | 3.428571429  |
| AM110I  | 0.1428571429  | 0.1428571429  | 0.1666666667 | 0.1666666667 | 0.6666666667 | 0.8571428571 |
| AM110C  | 0             | 0             | 0.0555555556 | 0.0555555556 | 0            | 0            |
| AM110D  | 0.04761904762 | 0.04761904762 | 0.1111111111 | 0.1111111111 | 0.325        | 0.4285714286 |
| AM114A  | 0.1904761905  | 0.1904761905  | 0.0555555556 | 0.0555555556 | 3.294117647  | 3.428571429  |
| AM117A  | 0.09523809524 | 0.09523809524 | 0            | 0            | inf          | 9.52381E+31  |
| AM117I  | 0.09523809524 | 0.09523809524 | 0.0555555556 | 0.0555555556 | 1.473684211  | 1.714285714  |
| AM118A  | 0             | 0             | 0.1111111111 | 0.1111111111 | 0            | 0            |
| AM120A  | 0.04761904762 | 0.04761904762 | 0.0555555556 | 0.0555555556 | 0.7          | 0.8571428571 |
| AM120A0 | 0.04761904762 | 0.04761904762 | 0.0555555556 | 0.0555555556 | 0.7          | 0.8571428571 |
| AM122A  | 0             | 0             | 0.0555555556 | 0.0555555556 | 0            | 0            |
| AM124A  | 0             | 0             | 0.0555555556 | 0.0555555556 | 0            | 0            |
| AM126A  | 0.04761904762 | 0.04761904762 | 0.1666666667 | 0.1666666667 | 0.2          | 0.2857142857 |
| AM126I  | 0             | 0             | 0.0555555556 | 0.0555555556 | 0            | 0            |
| AM129A  | 0.1428571429  | 0.1428571429  | 0.0555555556 | 0.0555555556 | 2.333333333  | 2.571428571  |
| AM129I  | 0.09523809524 | 0.09523809524 | 0.0555555556 | 0.0555555556 | 1.473684211  | 1.714285714  |
| AM131A  | 0.1428571429  | 0.1428571429  | 0.0555555556 | 0.0555555556 | 2.333333333  | 2.571428571  |
| AM131I  | 0.04761904762 | 0.04761904762 | 0.0555555556 | 0.0555555556 | 0.7          | 0.8571428571 |
| AM131C  | 0.04761904762 | 0.04761904762 | 0.1111111111 | 0.1111111111 | 0.325        | 0.4285714286 |
| AM133I  | 0.04761904762 | 0.04761904762 | 0.1111111111 | 0.1111111111 | 0.325        | 0.4285714286 |
| AM133C  | 0.09523809524 | 0.09523809524 | 0.0555555556 | 0.0555555556 | 1.473684211  | 1.714285714  |
| AM133D  | 0             | 0             | 0.0555555556 | 0.0555555556 | 0            | 0            |
| AM135I  | 0.04761904762 | 0.04761904762 | 0.1111111111 | 0.1111111111 | 0.325        | 0.4285714286 |
| AM136A  | 0             | 0             | 0.0555555556 | 0.0555555556 | 0            | 0            |

|         |               |               |              |              |              |              |
|---------|---------------|---------------|--------------|--------------|--------------|--------------|
| AM138A  | 0.1428571429  | 0.1428571429  | 0.2222222222 | 0.2222222222 | 0.4583333333 | 0.6428571429 |
| AM138B  | 0             | 0             | 0.0555555556 | 0.0555555556 | 0            | 0            |
| AM138C  | 0.1428571429  | 0.1428571429  | 0.2222222222 | 0.2222222222 | 0.4583333333 | 0.6428571429 |
| AM138D  | 0.04761904762 | 0.04761904762 | 0.1111111111 | 0.1111111111 | 0.325        | 0.4285714286 |
| AM138E  | 0.04761904762 | 0.04761904762 | 0.0555555556 | 0.0555555556 | 0.7          | 0.8571428571 |
| AM138F  | 0.1428571429  | 0.1428571429  | 0.2222222222 | 0.2222222222 | 0.4583333333 | 0.6428571429 |
| FAM13A  | 0             | 0             | 0.0555555556 | 0.0555555556 | 0            | 0            |
| M13A-A  | 0             | 0             | 0.0555555556 | 0.0555555556 | 0            | 0            |
| FAM13B  | 0.04761904762 | 0.04761904762 | 0            | 0            | inf          | 4.7619E+31   |
| FAM13C  | 0.04761904762 | 0.04761904762 | 0.0555555556 | 0.0555555556 | 0.7          | 0.8571428571 |
| AM149A  | 0             | 0             | 0.0555555556 | 0.0555555556 | 0            | 0            |
| AM149B  | 0.1904761905  | 0.1904761905  | 0.0555555556 | 0.0555555556 | 3.294117647  | 3.428571429  |
| AM151A  | 0.04761904762 | 0.04761904762 | 0.0555555556 | 0.0555555556 | 0.7          | 0.8571428571 |
| AM151B  | 0.04761904762 | 0.04761904762 | 0            | 0            | inf          | 4.7619E+31   |
| AM153A  | 0.09523809524 | 0.09523809524 | 0.0555555556 | 0.0555555556 | 1.473684211  | 1.714285714  |
| AM153B  | 0.04761904762 | 0.04761904762 | 0.0555555556 | 0.0555555556 | 0.7          | 0.8571428571 |
| AM153C  | 0.09523809524 | 0.09523809524 | 0.0555555556 | 0.0555555556 | 1.473684211  | 1.714285714  |
| AM157A  | 0.1428571429  | 0.1428571429  | 0.0555555556 | 0.0555555556 | 2.333333333  | 2.571428571  |
| AM157B  | 0.2380952381  | 0.2380952381  | 0.0555555556 | 0.0555555556 | 4.375        | 4.285714286  |
| AM157C  | 0.09523809524 | 0.09523809524 | 0            | 0            | inf          | 9.52381E+31  |
| AM160A  | 0             | 0             | 0.0555555556 | 0.0555555556 | 0            | 0            |
| AM160B  | 0.04761904762 | 0.04761904762 | 0            | 0            | inf          | 4.7619E+31   |
| AM160C  | 0.1904761905  | 0.1904761905  | 0.0555555556 | 0.0555555556 | 3.294117647  | 3.428571429  |
| AM160D  | 0.09523809524 | 0.09523809524 | 0.1111111111 | 0.1111111111 | 0.6842105263 | 0.8571428571 |
| AM161A  | 0.04761904762 | 0.04761904762 | 0.0555555556 | 0.0555555556 | 0.7          | 0.8571428571 |
| AM161B  | 0.09523809524 | 0.09523809524 | 0            | 0            | inf          | 9.52381E+31  |
| AM162A  | 0.09523809524 | 0.09523809524 | 0.0555555556 | 0.0555555556 | 1.473684211  | 1.714285714  |
| AM163A  | 0.1428571429  | 0.1428571429  | 0            | 0            | inf          | 1.42857E+32  |
| AM163B  | 0.04761904762 | 0.04761904762 | 0            | 0            | inf          | 4.7619E+31   |
| AM166A  | 0.1428571429  | 0.1428571429  | 0.0555555556 | 0.0555555556 | 2.333333333  | 2.571428571  |
| AM166B  | 0.09523809524 | 0.09523809524 | 0.0555555556 | 0.0555555556 | 1.473684211  | 1.714285714  |
| AM167A  | 0.09523809524 | 0.09523809524 | 0.1111111111 | 0.1111111111 | 0.6842105263 | 0.8571428571 |
| M167A-A | 0.09523809524 | 0.09523809524 | 0.1111111111 | 0.1111111111 | 0.6842105263 | 0.8571428571 |
| AM167B  | 0.04761904762 | 0.04761904762 | 0.1111111111 | 0.1111111111 | 0.325        | 0.4285714286 |
| AM168A  | 0             | 0             | 0.0555555556 | 0.0555555556 | 0            | 0            |
| AM169A  | 0.04761904762 | 0.04761904762 | 0            | 0            | inf          | 4.7619E+31   |
| AM169B  | 0.04761904762 | 0.04761904762 | 0.0555555556 | 0.0555555556 | 0.7          | 0.8571428571 |
| AM170A  | 0.04761904762 | 0.04761904762 | 0            | 0            | inf          | 4.7619E+31   |
| AM170B  | 0.09523809524 | 0.09523809524 | 0.0555555556 | 0.0555555556 | 1.473684211  | 1.714285714  |
| M170B-A | 0.09523809524 | 0.09523809524 | 0.0555555556 | 0.0555555556 | 1.473684211  | 1.714285714  |
| AM171A  | 0.09523809524 | 0.09523809524 | 0.1111111111 | 0.1111111111 | 0.6842105263 | 0.8571428571 |
| AM171B  | 0.09523809524 | 0.09523809524 | 0            | 0            | inf          | 9.52381E+31  |
| AM171C  | 0             | 0             | 0.0555555556 | 0.0555555556 | 0            | 0            |
| AM172A  | 0.04761904762 | 0.04761904762 | 0            | 0            | inf          | 4.7619E+31   |
| AM172B  | 0.09523809524 | 0.09523809524 | 0.0555555556 | 0.0555555556 | 1.473684211  | 1.714285714  |
| AM173A  | 0.04761904762 | 0.04761904762 | 0.2222222222 | 0.2222222222 | 0.1375       | 0.2142857143 |
| AM174A  | 0.04761904762 | 0.04761904762 | 0            | 0            | inf          | 4.7619E+31   |
| AM174B  | 0.04761904762 | 0.04761904762 | 0.0555555556 | 0.0555555556 | 0.7          | 0.8571428571 |
| AM177A  | 0.09523809524 | 0.09523809524 | 0            | 0            | inf          | 9.52381E+31  |
| AM177B  | 0.1428571429  | 0.1428571429  | 0.0555555556 | 0.0555555556 | 2.333333333  | 2.571428571  |
| AM178A  | 0             | 0             | 0.1111111111 | 0.1111111111 | 0            | 0            |

|         |               |               |               |               |              |              |
|---------|---------------|---------------|---------------|---------------|--------------|--------------|
| AM180A  | 0.04761904762 | 0.04761904762 | 0.05555555556 | 0.05555555556 | 0.7          | 0.8571428571 |
| AM180I  | 0             | 0             | 0.05555555556 | 0.05555555556 | 0            | 0            |
| AM182A  | 0.1904761905  | 0.1904761905  | 0.05555555556 | 0.05555555556 | 3.294117647  | 3.428571429  |
| AM182I  | 0.1904761905  | 0.1904761905  | 0.05555555556 | 0.05555555556 | 3.294117647  | 3.428571429  |
| AM183A  | 0.04761904762 | 0.04761904762 | 0.05555555556 | 0.05555555556 | 0.7          | 0.8571428571 |
| AM183B  | 0.04761904762 | 0.04761904762 | 0.2222222222  | 0.2222222222  | 0.1375       | 0.2142857143 |
| AM184I  | 0             | 0             | 0             | 0             |              | 0.00001      |
| AM185A  | 0.04761904762 | 0.04761904762 | 0.05555555556 | 0.05555555556 | 0.7          | 0.8571428571 |
| AM185B  | 0.04761904762 | 0.04761904762 | 0.1111111111  | 0.1111111111  | 0.325        | 0.4285714286 |
| AM186A  | 0.09523809524 | 0.09523809524 | 0.05555555556 | 0.05555555556 | 1.473684211  | 1.714285714  |
| AM186I  | 0.04761904762 | 0.04761904762 | 0.05555555556 | 0.05555555556 | 0.7          | 0.8571428571 |
| AM187A  | 0.1428571429  | 0.1428571429  | 0             | 0             | inf          | 1.42857E+32  |
| AM187I  | 0.04761904762 | 0.04761904762 | 0.05555555556 | 0.05555555556 | 0.7          | 0.8571428571 |
| AM189A  | 0             | 0             | 0.05555555556 | 0.05555555556 | 0            | 0            |
| AM189I  | 0.1904761905  | 0.1904761905  | 0.1111111111  | 0.1111111111  | 1.529411765  | 1.714285714  |
| AM192A  | 0.04761904762 | 0.04761904762 | 0             | 0             | inf          | 4.7619E+31   |
| AM193A  | 0.04761904762 | 0.04761904762 | 0             | 0             | inf          | 4.7619E+31   |
| AM193I  | 0.09523809524 | 0.09523809524 | 0.05555555556 | 0.05555555556 | 1.473684211  | 1.714285714  |
| M198B-A | 0             | 0             | 0.05555555556 | 0.05555555556 | 0            | 0            |
| AM200A  | 0.04761904762 | 0.04761904762 | 0.05555555556 | 0.05555555556 | 0.7          | 0.8571428571 |
| AM200I  | 0             | 0             | 0             | 0             |              | 0.00001      |
| AM201A  | 0.04761904762 | 0.04761904762 | 0.05555555556 | 0.05555555556 | 0.7          | 0.8571428571 |
| AM201I  | 0             | 0             | 0.05555555556 | 0.05555555556 | 0            | 0            |
| AM204A  | 0.2380952381  | 0.2380952381  | 0             | 0             | inf          | 2.38095E+32  |
| AM205A  | 0.09523809524 | 0.09523809524 | 0.05555555556 | 0.05555555556 | 1.473684211  | 1.714285714  |
| AM205B  | 0.09523809524 | 0.09523809524 | 0.05555555556 | 0.05555555556 | 1.473684211  | 1.714285714  |
| AM205C  | 0.09523809524 | 0.09523809524 | 0.05555555556 | 0.05555555556 | 1.473684211  | 1.714285714  |
| AM207A  | 0.04761904762 | 0.04761904762 | 0.1111111111  | 0.1111111111  | 0.325        | 0.4285714286 |
| AM209A  | 0.09523809524 | 0.09523809524 | 0.1666666667  | 0.1666666667  | 0.4210526316 | 0.5714285714 |
| AM209I  | 0.09523809524 | 0.09523809524 | 0.1666666667  | 0.1666666667  | 0.4210526316 | 0.5714285714 |
| FAM20A  | 0             | 0             | 0             | 0             |              | 0.00001      |
| FAM20B  | 0.1428571429  | 0.1428571429  | 0             | 0             | inf          | 1.42857E+32  |
| FAM20C  | 0.04761904762 | 0.04761904762 | 0.1666666667  | 0.1666666667  | 0.2          | 0.2857142857 |
| AM210A  | 0.09523809524 | 0.09523809524 | 0.05555555556 | 0.05555555556 | 1.473684211  | 1.714285714  |
| AM210I  | 0.09523809524 | 0.09523809524 | 0.1666666667  | 0.1666666667  | 0.4210526316 | 0.5714285714 |
| AM214A  | 0.04761904762 | 0.04761904762 | 0.05555555556 | 0.05555555556 | 0.7          | 0.8571428571 |
| AM214I  | 0.09523809524 | 0.09523809524 | 0.05555555556 | 0.05555555556 | 1.473684211  | 1.714285714  |
| AM215A  | 0.09523809524 | 0.09523809524 | 0             | 0             | inf          | 9.52381E+31  |
| AM216A  | 0             | 0             | 0.1111111111  | 0.1111111111  | 0            | 0            |
| AM217I  | 0.1428571429  | 0.1428571429  | 0.1666666667  | 0.1666666667  | 0.6666666667 | 0.8571428571 |
| AM218A  | 0.04761904762 | 0.04761904762 | 0.05555555556 | 0.05555555556 | 0.7          | 0.8571428571 |
| AM219A  | 0.09523809524 | 0.09523809524 | 0.05555555556 | 0.05555555556 | 1.473684211  | 1.714285714  |
| AM219I  | 0.04761904762 | 0.04761904762 | 0.05555555556 | 0.05555555556 | 0.7          | 0.8571428571 |
| AM21E   | 0.04761904762 | 0.04761904762 | 0.05555555556 | 0.05555555556 | 0.7          | 0.8571428571 |
| AM220A  | 0.04761904762 | 0.04761904762 | 0.1666666667  | 0.1666666667  | 0.2          | 0.2857142857 |
| AM221A  | 0.04761904762 | 0.04761904762 | 0.1666666667  | 0.1666666667  | 0.2          | 0.2857142857 |
| AM221I  | 0.09523809524 | 0.09523809524 | 0.05555555556 | 0.05555555556 | 1.473684211  | 1.714285714  |
| AM222A  | 0             | 0             | 0.05555555556 | 0.05555555556 | 0            | 0            |
| M222A-A | 0             | 0             | 0.05555555556 | 0.05555555556 | 0            | 0            |
| AM222I  | 0.04761904762 | 0.04761904762 | 0.05555555556 | 0.05555555556 | 0.7          | 0.8571428571 |
| AM225A  | 0.04761904762 | 0.04761904762 | 0.05555555556 | 0.05555555556 | 0.7          | 0.8571428571 |

|         |               |               |               |               |              |              |
|---------|---------------|---------------|---------------|---------------|--------------|--------------|
| FAM225  | 0.04761904762 | 0.04761904762 | 0.05555555556 | 0.05555555556 | 0.7          | 0.8571428571 |
| FAM227  | 0.04761904762 | 0.04761904762 | 0.11111111111 | 0.11111111111 | 0.325        | 0.4285714286 |
| FAM227  | 0.04761904762 | 0.04761904762 | 0.05555555556 | 0.05555555556 | 0.7          | 0.8571428571 |
| FAM229  | 0.04761904762 | 0.04761904762 | 0.11111111111 | 0.11111111111 | 0.325        | 0.4285714286 |
| FAM230  | 0.04761904762 | 0.04761904762 | 0.05555555556 | 0.05555555556 | 0.7          | 0.8571428571 |
| FAM230  | 0.04761904762 | 0.04761904762 | 0.05555555556 | 0.05555555556 | 0.7          | 0.8571428571 |
| FAM230  | 0.04761904762 | 0.04761904762 | 0.05555555556 | 0.05555555556 | 0.7          | 0.8571428571 |
| FAM230  | 0.04761904762 | 0.04761904762 | 0.05555555556 | 0.05555555556 | 0.7          | 0.8571428571 |
| FAM230  | 0.04761904762 | 0.04761904762 | 0.05555555556 | 0.05555555556 | 0.7          | 0.8571428571 |
| FAM230  | 0.04761904762 | 0.04761904762 | 0.05555555556 | 0.05555555556 | 0.7          | 0.8571428571 |
| FAM230  | 0.04761904762 | 0.04761904762 | 0.05555555556 | 0.05555555556 | 0.7          | 0.8571428571 |
| FAM230  | 0             | 0             | 0.05555555556 | 0.05555555556 | 0            | 0            |
| FAM230  | 0.04761904762 | 0.04761904762 | 0.05555555556 | 0.05555555556 | 0.7          | 0.8571428571 |
| FAM234  | 0.04761904762 | 0.04761904762 | 0.22222222222 | 0.22222222222 | 0.1375       | 0.2142857143 |
| FAM234  | 0.04761904762 | 0.04761904762 | 0.05555555556 | 0.05555555556 | 0.7          | 0.8571428571 |
| FAM237  | 0             | 0             | 0.05555555556 | 0.05555555556 | 0            | 0            |
| FAM238  | 0.09523809524 | 0.09523809524 | 0.11111111111 | 0.11111111111 | 0.6842105263 | 0.8571428571 |
| FAM238  | 0.09523809524 | 0.09523809524 | 0.11111111111 | 0.11111111111 | 0.6842105263 | 0.8571428571 |
| FAM238  | 0.09523809524 | 0.09523809524 | 0.11111111111 | 0.11111111111 | 0.6842105263 | 0.8571428571 |
| FAM241  | 0             | 0             | 0.05555555556 | 0.05555555556 | 0            | 0            |
| FAM241  | 0.09523809524 | 0.09523809524 | 0             | 0             | inf          | 9.52381E+31  |
| FAM242  | 0.09523809524 | 0.09523809524 | 0.05555555556 | 0.05555555556 | 1.473684211  | 1.714285714  |
| FAM242  | 0.1428571429  | 0.1428571429  | 0.05555555556 | 0.05555555556 | 2.3333333333 | 2.571428571  |
| FAM243  | 0.04761904762 | 0.04761904762 | 0.11111111111 | 0.11111111111 | 0.325        | 0.4285714286 |
| FAM243  | 0.04761904762 | 0.04761904762 | 0.11111111111 | 0.11111111111 | 0.325        | 0.4285714286 |
| FAM245  | 0.1428571429  | 0.1428571429  | 0.11111111111 | 0.11111111111 | 1.0833333333 | 1.285714286  |
| FAM24A  | 0.2380952381  | 0.2380952381  | 0.05555555556 | 0.05555555556 | 4.375        | 4.285714286  |
| FAM24B  | 0.2380952381  | 0.2380952381  | 0.05555555556 | 0.05555555556 | 4.375        | 4.285714286  |
| F24B-CU | 0.2380952381  | 0.2380952381  | 0.05555555556 | 0.05555555556 | 4.375        | 4.285714286  |
| FAM25B  | 0.1428571429  | 0.1428571429  | 0.05555555556 | 0.05555555556 | 2.3333333333 | 2.571428571  |
| FAM25C  | 0.1428571429  | 0.1428571429  | 0.05555555556 | 0.05555555556 | 2.3333333333 | 2.571428571  |
| FAM25E  | 0.1428571429  | 0.1428571429  | 0.05555555556 | 0.05555555556 | 2.3333333333 | 2.571428571  |
| FAM25C  | 0.1428571429  | 0.1428571429  | 0.05555555556 | 0.05555555556 | 2.3333333333 | 2.571428571  |
| FAM27B  | 0.09523809524 | 0.09523809524 | 0.22222222222 | 0.22222222222 | 0.2894736842 | 0.4285714286 |
| FAM27C  | 0.1428571429  | 0.1428571429  | 0.05555555556 | 0.05555555556 | 2.3333333333 | 2.571428571  |
| FAM27E  | 0.1428571429  | 0.1428571429  | 0.05555555556 | 0.05555555556 | 2.3333333333 | 2.571428571  |
| FAM27E  | 0.09523809524 | 0.09523809524 | 0.22222222222 | 0.22222222222 | 0.2894736842 | 0.4285714286 |
| FAM27E  | 0.09523809524 | 0.09523809524 | 0.05555555556 | 0.05555555556 | 1.473684211  | 1.714285714  |
| FAM30A  | 0.04761904762 | 0.04761904762 | 0             | 0             | inf          | 4.7619E+31   |
| FAM30C  | 0.2857142857  | 0.2857142857  | 0.11111111111 | 0.11111111111 | 2.6          | 2.571428571  |
| FAM32A  | 0.1428571429  | 0.1428571429  | 0.11111111111 | 0.11111111111 | 1.0833333333 | 1.285714286  |
| FAM3B   | 0.04761904762 | 0.04761904762 | 0.11111111111 | 0.11111111111 | 0.325        | 0.4285714286 |
| FAM3C   | 0.04761904762 | 0.04761904762 | 0.05555555556 | 0.05555555556 | 0.7          | 0.8571428571 |
| FAM3D   | 0.04761904762 | 0.04761904762 | 0             | 0             | inf          | 4.7619E+31   |
| F3D-A   | 0.04761904762 | 0.04761904762 | 0             | 0             | inf          | 4.7619E+31   |
| FAM41C  | 0             | 0             | 0.11111111111 | 0.11111111111 | 0            | 0            |
| FAM43A  | 0.09523809524 | 0.09523809524 | 0.05555555556 | 0.05555555556 | 1.473684211  | 1.714285714  |
| FAM43B  | 0.04761904762 | 0.04761904762 | 0.11111111111 | 0.11111111111 | 0.325        | 0.4285714286 |
| FAM45A  | 0.2380952381  | 0.2380952381  | 0             | 0             | inf          | 2.38095E+32  |
| FAM47E  | 0.04761904762 | 0.04761904762 | 0.05555555556 | 0.05555555556 | 0.7          | 0.8571428571 |
| F47E-ST | 0.04761904762 | 0.04761904762 | 0.05555555556 | 0.05555555556 | 0.7          | 0.8571428571 |

|         |               |               |               |               |              |              |
|---------|---------------|---------------|---------------|---------------|--------------|--------------|
| FAM49A  | 0             | 0             | 0.05555555556 | 0.05555555556 | 0            | 0            |
| FAM49B  | 0.04761904762 | 0.04761904762 | 0.11111111111 | 0.11111111111 | 0.325        | 0.4285714286 |
| FAM53A  | 0.04761904762 | 0.04761904762 | 0             | 0             | inf          | 4.7619E+31   |
| FAM53B  | 0.2380952381  | 0.2380952381  | 0.05555555556 | 0.05555555556 | 4.375        | 4.285714286  |
| M53B-A  | 0.2380952381  | 0.2380952381  | 0.05555555556 | 0.05555555556 | 4.375        | 4.285714286  |
| FAM53C  | 0.04761904762 | 0.04761904762 | 0             | 0             | inf          | 4.7619E+31   |
| FAM57B  | 0.04761904762 | 0.04761904762 | 0             | 0             | inf          | 4.7619E+31   |
| FAM66A  | 0.09523809524 | 0.09523809524 | 0.11111111111 | 0.11111111111 | 0.6842105263 | 0.8571428571 |
| FAM66B  | 0.09523809524 | 0.09523809524 | 0.22222222222 | 0.22222222222 | 0.2894736842 | 0.4285714286 |
| FAM66C  | 0.04761904762 | 0.04761904762 | 0.11111111111 | 0.11111111111 | 0.325        | 0.4285714286 |
| FAM66D  | 0.09523809524 | 0.09523809524 | 0.11111111111 | 0.11111111111 | 0.6842105263 | 0.8571428571 |
| FAM66E  | 0.09523809524 | 0.09523809524 | 0.22222222222 | 0.22222222222 | 0.2894736842 | 0.4285714286 |
| FAM71A  | 0.09523809524 | 0.09523809524 | 0             | 0             | inf          | 9.52381E+31  |
| FAM71B  | 0.04761904762 | 0.04761904762 | 0.05555555556 | 0.05555555556 | 0.7          | 0.8571428571 |
| FAM71C  | 0.04761904762 | 0.04761904762 | 0.05555555556 | 0.05555555556 | 0.7          | 0.8571428571 |
| FAM71E  | 0.09523809524 | 0.09523809524 | 0.11111111111 | 0.11111111111 | 0.6842105263 | 0.8571428571 |
| FAM71E  | 0.09523809524 | 0.09523809524 | 0.05555555556 | 0.05555555556 | 1.473684211  | 1.714285714  |
| FAM71F  | 0.04761904762 | 0.04761904762 | 0.05555555556 | 0.05555555556 | 0.7          | 0.8571428571 |
| FAM71F  | 0.04761904762 | 0.04761904762 | 0.05555555556 | 0.05555555556 | 0.7          | 0.8571428571 |
| FAM72A  | 0.1428571429  | 0.1428571429  | 0             | 0             | inf          | 1.42857E+32  |
| FAM72B  | 0.04761904762 | 0.04761904762 | 0.11111111111 | 0.11111111111 | 0.325        | 0.4285714286 |
| FAM72C  | 0.1428571429  | 0.1428571429  | 0.05555555556 | 0.05555555556 | 2.333333333  | 2.571428571  |
| FAM72D  | 0.09523809524 | 0.09523809524 | 0.05555555556 | 0.05555555556 | 1.473684211  | 1.714285714  |
| FAM74A  | 0.09523809524 | 0.09523809524 | 0.22222222222 | 0.22222222222 | 0.2894736842 | 0.4285714286 |
| FAM74A  | 0.04761904762 | 0.04761904762 | 0.11111111111 | 0.11111111111 | 0.325        | 0.4285714286 |
| FAM74A  | 0.09523809524 | 0.09523809524 | 0.22222222222 | 0.22222222222 | 0.2894736842 | 0.4285714286 |
| FAM74A  | 0.09523809524 | 0.09523809524 | 0.22222222222 | 0.22222222222 | 0.2894736842 | 0.4285714286 |
| FAM74A  | 0.1428571429  | 0.1428571429  | 0.05555555556 | 0.05555555556 | 2.333333333  | 2.571428571  |
| FAM76A  | 0.04761904762 | 0.04761904762 | 0.11111111111 | 0.11111111111 | 0.325        | 0.4285714286 |
| FAM78A  | 0.09523809524 | 0.09523809524 | 0.05555555556 | 0.05555555556 | 1.473684211  | 1.714285714  |
| FAM78B  | 0.1428571429  | 0.1428571429  | 0             | 0             | inf          | 1.42857E+32  |
| FAM81A  | 0.04761904762 | 0.04761904762 | 0.05555555556 | 0.05555555556 | 0.7          | 0.8571428571 |
| FAM81B  | 0.04761904762 | 0.04761904762 | 0             | 0             | inf          | 4.7619E+31   |
| FAM83A  | 0.1428571429  | 0.1428571429  | 0.11111111111 | 0.11111111111 | 1.083333333  | 1.285714286  |
| M83A-A  | 0.1428571429  | 0.1428571429  | 0.11111111111 | 0.11111111111 | 1.083333333  | 1.285714286  |
| FAM83B  | 0.04761904762 | 0.04761904762 | 0             | 0             | inf          | 4.7619E+31   |
| FAM83C  | 0.09523809524 | 0.09523809524 | 0.11111111111 | 0.11111111111 | 0.6842105263 | 0.8571428571 |
| M83C-A  | 0.09523809524 | 0.09523809524 | 0.11111111111 | 0.11111111111 | 0.6842105263 | 0.8571428571 |
| FAM83D  | 0.1428571429  | 0.1428571429  | 0.22222222222 | 0.22222222222 | 0.4583333333 | 0.6428571429 |
| FAM83E  | 0.09523809524 | 0.09523809524 | 0.11111111111 | 0.11111111111 | 0.6842105263 | 0.8571428571 |
| FAM83F  | 0             | 0             | 0.11111111111 | 0.11111111111 | 0            | 0            |
| FAM83C  | 0.04761904762 | 0.04761904762 | 0.11111111111 | 0.11111111111 | 0.325        | 0.4285714286 |
| FAM83H  | 0.04761904762 | 0.04761904762 | 0.16666666667 | 0.16666666667 | 0.2          | 0.2857142857 |
| M83H-A  | 0.04761904762 | 0.04761904762 | 0.16666666667 | 0.16666666667 | 0.2          | 0.2857142857 |
| FAM85A  | 0.09523809524 | 0.09523809524 | 0.11111111111 | 0.11111111111 | 0.6842105263 | 0.8571428571 |
| FAM85B  | 0.09523809524 | 0.09523809524 | 0.16666666667 | 0.16666666667 | 0.4210526316 | 0.5714285714 |
| FAM86B  | 0.09523809524 | 0.09523809524 | 0.11111111111 | 0.11111111111 | 0.6842105263 | 0.8571428571 |
| FAM86B  | 0.09523809524 | 0.09523809524 | 0.11111111111 | 0.11111111111 | 0.6842105263 | 0.8571428571 |
| FAM86B3 | 0.09523809524 | 0.09523809524 | 0.16666666667 | 0.16666666667 | 0.4210526316 | 0.5714285714 |
| FAM86D  | 0.04761904762 | 0.04761904762 | 0             | 0             | inf          | 4.7619E+31   |
| FAM86F  | 0.04761904762 | 0.04761904762 | 0.11111111111 | 0.11111111111 | 0.325        | 0.4285714286 |

|         |               |               |               |               |              |              |
|---------|---------------|---------------|---------------|---------------|--------------|--------------|
| AM86H   | 0.09523809524 | 0.09523809524 | 0.05555555556 | 0.05555555556 | 1.473684211  | 1.714285714  |
| FAM86J  | 0.04761904762 | 0.04761904762 | 0.05555555556 | 0.05555555556 | 0.7          | 0.8571428571 |
| FAM87A  | 0.09523809524 | 0.09523809524 | 0.11111111111 | 0.11111111111 | 0.6842105263 | 0.8571428571 |
| FAM87B  | 0             | 0             | 0.11111111111 | 0.11111111111 | 0            | 0            |
| FAM89A  | 0.1428571429  | 0.1428571429  | 0             | 0             | inf          | 1.42857E+32  |
| AM90A   | 0.04761904762 | 0.04761904762 | 0.11111111111 | 0.11111111111 | 0.325        | 0.4285714286 |
| AM90A1  | 0.09523809524 | 0.09523809524 | 0.22222222222 | 0.22222222222 | 0.2894736842 | 0.4285714286 |
| AM90A2  | 0.09523809524 | 0.09523809524 | 0.11111111111 | 0.11111111111 | 0.6842105263 | 0.8571428571 |
| AM90A2  | 0.09523809524 | 0.09523809524 | 0.05555555556 | 0.05555555556 | 1.473684211  | 1.714285714  |
| AM90A2  | 0.09523809524 | 0.09523809524 | 0.11111111111 | 0.11111111111 | 0.6842105263 | 0.8571428571 |
| AM90A7  | 0.09523809524 | 0.09523809524 | 0.22222222222 | 0.22222222222 | 0.2894736842 | 0.4285714286 |
| AM91A   | 0.1428571429  | 0.1428571429  | 0.11111111111 | 0.11111111111 | 1.083333333  | 1.285714286  |
| FAM92A  | 0.1904761905  | 0.1904761905  | 0.11111111111 | 0.11111111111 | 1.529411765  | 1.714285714  |
| AM92A1  | 0             | 0             | 0.05555555556 | 0.05555555556 | 0            | 0            |
| FAM92B  | 0.04761904762 | 0.04761904762 | 0             | 0             | inf          | 4.7619E+31   |
| FAM95A  | 0             | 0             | 0.11111111111 | 0.11111111111 | 0            | 0            |
| AM95B   | 0.1904761905  | 0.1904761905  | 0.22222222222 | 0.22222222222 | 0.6470588235 | 0.8571428571 |
| FAM95C  | 0.04761904762 | 0.04761904762 | 0.05555555556 | 0.05555555556 | 0.7          | 0.8571428571 |
| FAM98B  | 0             | 0             | 0             | 0             |              | 0.00001      |
| FAM98C  | 0.04761904762 | 0.04761904762 | 0.05555555556 | 0.05555555556 | 0.7          | 0.8571428571 |
| FAM99A  | 0.04761904762 | 0.04761904762 | 0             | 0             | inf          | 4.7619E+31   |
| FAM99B  | 0.04761904762 | 0.04761904762 | 0             | 0             | inf          | 4.7619E+31   |
| FANCA   | 0.09523809524 | 0.09523809524 | 0             | 0             | inf          | 9.52381E+31  |
| FANCC   | 0.04761904762 | 0.04761904762 | 0.05555555556 | 0.05555555556 | 0.7          | 0.8571428571 |
| FANCD   | 0.09523809524 | 0.09523809524 | 0             | 0             | inf          | 9.52381E+31  |
| FANCD2  | 0.09523809524 | 0.09523809524 | 0             | 0             | inf          | 9.52381E+31  |
| FANCE   | 0.04761904762 | 0.04761904762 | 0.05555555556 | 0.05555555556 | 0.7          | 0.8571428571 |
| FANCG   | 0.09523809524 | 0.09523809524 | 0.05555555556 | 0.05555555556 | 1.473684211  | 1.714285714  |
| FANCI   | 0.04761904762 | 0.04761904762 | 0.05555555556 | 0.05555555556 | 0.7          | 0.8571428571 |
| FANCL   | 0.04761904762 | 0.04761904762 | 0.05555555556 | 0.05555555556 | 0.7          | 0.8571428571 |
| FANCM   | 0.04761904762 | 0.04761904762 | 0             | 0             | inf          | 4.7619E+31   |
| FANK1   | 0.2380952381  | 0.2380952381  | 0.05555555556 | 0.05555555556 | 4.375        | 4.285714286  |
| FANK1-A | 0.2380952381  | 0.2380952381  | 0.05555555556 | 0.05555555556 | 4.375        | 4.285714286  |
| FAP     | 0             | 0             | 0.05555555556 | 0.05555555556 | 0            | 0            |
| FAR2    | 0.04761904762 | 0.04761904762 | 0.05555555556 | 0.05555555556 | 0.7          | 0.8571428571 |
| FAR2P1  | 0             | 0             | 0.05555555556 | 0.05555555556 | 0            | 0            |
| FAR2P2  | 0             | 0             | 0.05555555556 | 0.05555555556 | 0            | 0            |
| FARP2   | 0             | 0             | 0.05555555556 | 0.05555555556 | 0            | 0            |
| FARSA   | 0.1428571429  | 0.1428571429  | 0.11111111111 | 0.11111111111 | 1.083333333  | 1.285714286  |
| FARSA-A | 0.1428571429  | 0.1428571429  | 0.11111111111 | 0.11111111111 | 1.083333333  | 1.285714286  |
| FARSB   | 0             | 0             | 0.05555555556 | 0.05555555556 | 0            | 0            |
| FAS     | 0.1428571429  | 0.1428571429  | 0.16666666667 | 0.16666666667 | 0.6666666667 | 0.8571428571 |
| FAS-AS1 | 0.1428571429  | 0.1428571429  | 0.16666666667 | 0.16666666667 | 0.6666666667 | 0.8571428571 |
| FASLG   | 0.1428571429  | 0.1428571429  | 0             | 0             | inf          | 1.42857E+32  |
| FASN    | 0.04761904762 | 0.04761904762 | 0             | 0             | inf          | 4.7619E+31   |
| FASTK   | 0.09523809524 | 0.09523809524 | 0.05555555556 | 0.05555555556 | 1.473684211  | 1.714285714  |
| ASTKD   | 0             | 0             | 0.05555555556 | 0.05555555556 | 0            | 0            |
| ASTKD   | 0             | 0             | 0.05555555556 | 0.05555555556 | 0            | 0            |
| ASTKD   | 0             | 0             | 0.05555555556 | 0.05555555556 | 0            | 0            |
| ASTKD   | 0.1904761905  | 0.1904761905  | 0.05555555556 | 0.05555555556 | 3.294117647  | 3.428571429  |
| FAT1    | 0             | 0             | 0.05555555556 | 0.05555555556 | 0            | 0            |

|          |               |               |               |               |              |              |
|----------|---------------|---------------|---------------|---------------|--------------|--------------|
| FAT4     | 0             | 0             | 0.05555555556 | 0.05555555556 | 0            | 0            |
| FAXDC2   | 0             | 0             | 0.05555555556 | 0.05555555556 | 0            | 0            |
| FBF1     | 0.04761904762 | 0.04761904762 | 0             | 0             | inf          | 4.7619E+31   |
| FBH1     | 0.09523809524 | 0.09523809524 | 0.11111111111 | 0.11111111111 | 0.6842105263 | 0.8571428571 |
| FBL      | 0.04761904762 | 0.04761904762 | 0.05555555556 | 0.05555555556 | 0.7          | 0.8571428571 |
| FBLIM1   | 0.04761904762 | 0.04761904762 | 0.11111111111 | 0.11111111111 | 0.325        | 0.4285714286 |
| FBLI1    | 0             | 0             | 0.05555555556 | 0.05555555556 | 0            | 0            |
| FBLN1    | 0             | 0             | 0.11111111111 | 0.11111111111 | 0            | 0            |
| FBLN2    | 0.04761904762 | 0.04761904762 | 0             | 0             | inf          | 4.7619E+31   |
| FBLN7    | 0             | 0             | 0.05555555556 | 0.05555555556 | 0            | 0            |
| FBN1     | 0.04761904762 | 0.04761904762 | 0.05555555556 | 0.05555555556 | 0.7          | 0.8571428571 |
| FBN2     | 0.04761904762 | 0.04761904762 | 0             | 0             | inf          | 4.7619E+31   |
| FBN3     | 0.1428571429  | 0.1428571429  | 0.05555555556 | 0.05555555556 | 2.333333333  | 2.571428571  |
| FBP1     | 0.04761904762 | 0.04761904762 | 0.05555555556 | 0.05555555556 | 0.7          | 0.8571428571 |
| FBP2     | 0.04761904762 | 0.04761904762 | 0.05555555556 | 0.05555555556 | 0.7          | 0.8571428571 |
| FBRS     | 0.04761904762 | 0.04761904762 | 0             | 0             | inf          | 4.7619E+31   |
| FBRSL1   | 0.09523809524 | 0.09523809524 | 0.05555555556 | 0.05555555556 | 1.473684211  | 1.714285714  |
| FBXL12   | 0.1428571429  | 0.1428571429  | 0.11111111111 | 0.11111111111 | 1.083333333  | 1.285714286  |
| FBXL13   | 0.04761904762 | 0.04761904762 | 0.05555555556 | 0.05555555556 | 0.7          | 0.8571428571 |
| FBXL14   | 0.04761904762 | 0.04761904762 | 0.11111111111 | 0.11111111111 | 0.325        | 0.4285714286 |
| FBXL15   | 0.1428571429  | 0.1428571429  | 0.05555555556 | 0.05555555556 | 2.333333333  | 2.571428571  |
| FBXL16   | 0.04761904762 | 0.04761904762 | 0.22222222222 | 0.22222222222 | 0.1375       | 0.2142857143 |
| FBXL17   | 0.04761904762 | 0.04761904762 | 0             | 0             | inf          | 4.7619E+31   |
| FBXL18   | 0.04761904762 | 0.04761904762 | 0.16666666667 | 0.16666666667 | 0.2          | 0.2857142857 |
| FBXL19   | 0.04761904762 | 0.04761904762 | 0             | 0             | inf          | 4.7619E+31   |
| FBXL19-A | 0.04761904762 | 0.04761904762 | 0             | 0             | inf          | 4.7619E+31   |
| FBXL2    | 0.09523809524 | 0.09523809524 | 0             | 0             | inf          | 9.52381E+31  |
| FBXL20   | 0.09523809524 | 0.09523809524 | 0             | 0             | inf          | 9.52381E+31  |
| FBXL21   | 0.04761904762 | 0.04761904762 | 0             | 0             | inf          | 4.7619E+31   |
| FBXL22   | 0.04761904762 | 0.04761904762 | 0.05555555556 | 0.05555555556 | 0.7          | 0.8571428571 |
| FBXL3    | 0             | 0             | 0.05555555556 | 0.05555555556 | 0            | 0            |
| FBXL5    | 0             | 0             | 0             | 0             |              | 0.00001      |
| FBXL6    | 0.04761904762 | 0.04761904762 | 0.16666666667 | 0.16666666667 | 0.2          | 0.2857142857 |
| FBXL7    | 0.04761904762 | 0.04761904762 | 0.05555555556 | 0.05555555556 | 0.7          | 0.8571428571 |
| FBXL8    | 0.1428571429  | 0.1428571429  | 0.05555555556 | 0.05555555556 | 2.333333333  | 2.571428571  |
| FBXO10   | 0.09523809524 | 0.09523809524 | 0.05555555556 | 0.05555555556 | 1.473684211  | 1.714285714  |
| FBXO11   | 0             | 0             | 0.05555555556 | 0.05555555556 | 0            | 0            |
| FBXO16   | 0.04761904762 | 0.04761904762 | 0.11111111111 | 0.11111111111 | 0.325        | 0.4285714286 |
| FBXO17   | 0.04761904762 | 0.04761904762 | 0.05555555556 | 0.05555555556 | 0.7          | 0.8571428571 |
| FBXO2    | 0.04761904762 | 0.04761904762 | 0.11111111111 | 0.11111111111 | 0.325        | 0.4285714286 |
| FBXO21   | 0             | 0             | 0.05555555556 | 0.05555555556 | 0            | 0            |
| FBXO22   | 0.04761904762 | 0.04761904762 | 0.05555555556 | 0.05555555556 | 0.7          | 0.8571428571 |
| FBXO24   | 0.04761904762 | 0.04761904762 | 0.05555555556 | 0.05555555556 | 0.7          | 0.8571428571 |
| FBXO25   | 0.09523809524 | 0.09523809524 | 0.11111111111 | 0.11111111111 | 0.6842105263 | 0.8571428571 |
| FBXO27   | 0.04761904762 | 0.04761904762 | 0.05555555556 | 0.05555555556 | 0.7          | 0.8571428571 |
| FBXO28   | 0.1428571429  | 0.1428571429  | 0.05555555556 | 0.05555555556 | 2.333333333  | 2.571428571  |
| FBXO31   | 0.04761904762 | 0.04761904762 | 0             | 0             | inf          | 4.7619E+31   |
| FBXO32   | 0.1428571429  | 0.1428571429  | 0.11111111111 | 0.11111111111 | 1.083333333  | 1.285714286  |
| FBXO33   | 0.04761904762 | 0.04761904762 | 0             | 0             | inf          | 4.7619E+31   |
| FBXO34   | 0.04761904762 | 0.04761904762 | 0             | 0             | inf          | 4.7619E+31   |
| FBXO36   | 0             | 0             | 0.05555555556 | 0.05555555556 | 0            | 0            |



|        |               |               |               |               |              |              |
|--------|---------------|---------------|---------------|---------------|--------------|--------------|
| FBXO39 | 0             | 0             | 0.05555555556 | 0.05555555556 | 0            | 0            |
| FBXO4  | 0.04761904762 | 0.04761904762 | 0.05555555556 | 0.05555555556 | 0.7          | 0.8571428571 |
| FBXO40 | 0.1428571429  | 0.1428571429  | 0.05555555556 | 0.05555555556 | 2.333333333  | 2.571428571  |
| FBXO41 | 0             | 0             | 0.05555555556 | 0.05555555556 | 0            | 0            |
| FBXO42 | 0.04761904762 | 0.04761904762 | 0.1111111111  | 0.1111111111  | 0.325        | 0.4285714286 |
| FBXO43 | 0.1904761905  | 0.1904761905  | 0.1111111111  | 0.1111111111  | 1.529411765  | 1.714285714  |
| FBXO44 | 0.04761904762 | 0.04761904762 | 0.1111111111  | 0.1111111111  | 0.325        | 0.4285714286 |
| FBXO45 | 0.1428571429  | 0.1428571429  | 0.05555555556 | 0.05555555556 | 2.333333333  | 2.571428571  |
| FBXO46 | 0.09523809524 | 0.09523809524 | 0.1111111111  | 0.1111111111  | 0.6842105263 | 0.8571428571 |
| FBXO47 | 0.09523809524 | 0.09523809524 | 0             | 0             | inf          | 9.52381E+31  |
| FBXO48 | 0             | 0             | 0.05555555556 | 0.05555555556 | 0            | 0            |
| FBXO6  | 0.04761904762 | 0.04761904762 | 0.1111111111  | 0.1111111111  | 0.325        | 0.4285714286 |
| FBXO7  | 0.04761904762 | 0.04761904762 | 0.1111111111  | 0.1111111111  | 0.325        | 0.4285714286 |
| FBXO8  | 0             | 0             | 0.05555555556 | 0.05555555556 | 0            | 0            |
| FBXO9  | 0.04761904762 | 0.04761904762 | 0             | 0             | inf          | 4.7619E+31   |
| FBXW10 | 0.04761904762 | 0.04761904762 | 0.1111111111  | 0.1111111111  | 0.325        | 0.4285714286 |
| FBXW11 | 0             | 0             | 0.05555555556 | 0.05555555556 | 0            | 0            |
| FBXW12 | 0.09523809524 | 0.09523809524 | 0             | 0             | inf          | 9.52381E+31  |
| FBXW2  | 0.09523809524 | 0.09523809524 | 0.05555555556 | 0.05555555556 | 1.473684211  | 1.714285714  |
| FBXW4  | 0.1428571429  | 0.1428571429  | 0             | 0             | inf          | 1.42857E+32  |
| BXW4P  | 0             | 0             | 0.05555555556 | 0.05555555556 | 0            | 0            |
| FBXW5  | 0.1428571429  | 0.1428571429  | 0.05555555556 | 0.05555555556 | 2.333333333  | 2.571428571  |
| FBXW7  | 0             | 0             | 0.05555555556 | 0.05555555556 | 0            | 0            |
| BXW7-A | 0             | 0             | 0.05555555556 | 0.05555555556 | 0            | 0            |
| FBXW8  | 0             | 0             | 0.05555555556 | 0.05555555556 | 0            | 0            |
| FBXW9  | 0.1428571429  | 0.1428571429  | 0.1111111111  | 0.1111111111  | 1.083333333  | 1.285714286  |
| FCAMR  | 0.1428571429  | 0.1428571429  | 0             | 0             | inf          | 1.42857E+32  |
| FCAR   | 0.09523809524 | 0.09523809524 | 0.05555555556 | 0.05555555556 | 1.473684211  | 1.714285714  |
| FCERIA | 0.1428571429  | 0.1428571429  | 0             | 0             | inf          | 1.42857E+32  |
| FCERIG | 0.1428571429  | 0.1428571429  | 0             | 0             | inf          | 1.42857E+32  |
| FCER2  | 0.1428571429  | 0.1428571429  | 0.05555555556 | 0.05555555556 | 2.333333333  | 2.571428571  |
| FCF1P2 | 0.09523809524 | 0.09523809524 | 0             | 0             | inf          | 9.52381E+31  |
| FCGBP  | 0.04761904762 | 0.04761904762 | 0.05555555556 | 0.05555555556 | 0.7          | 0.8571428571 |
| FCGRIA | 0.1428571429  | 0.1428571429  | 0.05555555556 | 0.05555555556 | 2.333333333  | 2.571428571  |
| FCGRIE | 0.04761904762 | 0.04761904762 | 0.1111111111  | 0.1111111111  | 0.325        | 0.4285714286 |
| CGR1C  | 0.09523809524 | 0.09523809524 | 0.05555555556 | 0.05555555556 | 1.473684211  | 1.714285714  |
| FCGR2A | 0.1428571429  | 0.1428571429  | 0             | 0             | inf          | 1.42857E+32  |
| FCGR2B | 0.1428571429  | 0.1428571429  | 0             | 0             | inf          | 1.42857E+32  |
| FCGR2C | 0.1428571429  | 0.1428571429  | 0             | 0             | inf          | 1.42857E+32  |
| FCGR3A | 0.1428571429  | 0.1428571429  | 0             | 0             | inf          | 1.42857E+32  |
| FCGR3B | 0.1428571429  | 0.1428571429  | 0             | 0             | inf          | 1.42857E+32  |
| FCGRT  | 0.09523809524 | 0.09523809524 | 0.1111111111  | 0.1111111111  | 0.6842105263 | 0.8571428571 |
| FCHO1  | 0.1428571429  | 0.1428571429  | 0.1111111111  | 0.1111111111  | 1.083333333  | 1.285714286  |
| FCHO2  | 0             | 0             | 0.05555555556 | 0.05555555556 | 0            | 0            |
| FCHSD1 | 0.04761904762 | 0.04761904762 | 0             | 0             | inf          | 4.7619E+31   |
| FCMR   | 0.1428571429  | 0.1428571429  | 0             | 0             | inf          | 1.42857E+32  |
| FCN1   | 0.04761904762 | 0.04761904762 | 0             | 0             | inf          | 4.7619E+31   |
| FCN2   | 0.04761904762 | 0.04761904762 | 0             | 0             | inf          | 4.7619E+31   |
| FCN3   | 0.04761904762 | 0.04761904762 | 0.1111111111  | 0.1111111111  | 0.325        | 0.4285714286 |
| FCRL1  | 0.1428571429  | 0.1428571429  | 0.05555555556 | 0.05555555556 | 2.333333333  | 2.571428571  |
| FCRL2  | 0.1428571429  | 0.1428571429  | 0.05555555556 | 0.05555555556 | 2.333333333  | 2.571428571  |

|                |               |               |              |              |              |              |
|----------------|---------------|---------------|--------------|--------------|--------------|--------------|
| <b>FCRL3</b>   | 0.1428571429  | 0.1428571429  | 0.0555555556 | 0.0555555556 | 2.333333333  | 2.571428571  |
| <b>FCRL4</b>   | 0.1428571429  | 0.1428571429  | 0.0555555556 | 0.0555555556 | 2.333333333  | 2.571428571  |
| <b>FCRL5</b>   | 0.1428571429  | 0.1428571429  | 0.0555555556 | 0.0555555556 | 2.333333333  | 2.571428571  |
| <b>FCRL6</b>   | 0.1428571429  | 0.1428571429  | 0            | 0            | inf          | 1.42857E+32  |
| <b>FCRLA</b>   | 0.1428571429  | 0.1428571429  | 0            | 0            | inf          | 1.42857E+32  |
| <b>FCRLB</b>   | 0.1428571429  | 0.1428571429  | 0            | 0            | inf          | 1.42857E+32  |
| <b>FCSK</b>    | 0.1428571429  | 0.1428571429  | 0.0555555556 | 0.0555555556 | 2.333333333  | 2.571428571  |
| <b>FDCSP</b>   | 0.04761904762 | 0.04761904762 | 0.0555555556 | 0.0555555556 | 0.7          | 0.8571428571 |
| <b>FDFT1</b>   | 0.09523809524 | 0.09523809524 | 0.1111111111 | 0.1111111111 | 0.6842105263 | 0.8571428571 |
| <b>FDPS</b>    | 0.1904761905  | 0.1904761905  | 0.1111111111 | 0.1111111111 | 1.529411765  | 1.714285714  |
| <b>FDPS2</b>   | 0.09523809524 | 0.09523809524 | 0.1111111111 | 0.1111111111 | 0.6842105263 | 0.8571428571 |
| <b>FDXR</b>    | 0.04761904762 | 0.04761904762 | 0            | 0            | inf          | 4.7619E+31   |
| <b>FECH</b>    | 0.09523809524 | 0.09523809524 | 0            | 0            | inf          | 9.52381E+31  |
| <b>FEM1A</b>   | 0.09523809524 | 0.09523809524 | 0.0555555556 | 0.0555555556 | 1.473684211  | 1.714285714  |
| <b>FEM1B</b>   | 0.04761904762 | 0.04761904762 | 0.0555555556 | 0.0555555556 | 0.7          | 0.8571428571 |
| <b>FEM1C</b>   | 0.04761904762 | 0.04761904762 | 0            | 0            | inf          | 4.7619E+31   |
| <b>FENDRE</b>  | 0.04761904762 | 0.04761904762 | 0            | 0            | inf          | 4.7619E+31   |
| <b>FER</b>     | 0.04761904762 | 0.04761904762 | 0            | 0            | inf          | 4.7619E+31   |
| <b>FER1L4</b>  | 0.09523809524 | 0.09523809524 | 0.1111111111 | 0.1111111111 | 0.6842105263 | 0.8571428571 |
| <b>FER1L5</b>  | 0             | 0             | 0.1111111111 | 0.1111111111 | 0            | 0            |
| <b>FER1L6</b>  | 0.1428571429  | 0.1428571429  | 0.1111111111 | 0.1111111111 | 1.083333333  | 1.285714286  |
| <b>RIL6-A</b>  | 0.1428571429  | 0.1428571429  | 0.1111111111 | 0.1111111111 | 1.083333333  | 1.285714286  |
| <b>RIL6-A</b>  | 0.1428571429  | 0.1428571429  | 0.1111111111 | 0.1111111111 | 1.083333333  | 1.285714286  |
| <b>FERD3L</b>  | 0.04761904762 | 0.04761904762 | 0.2222222222 | 0.2222222222 | 0.1375       | 0.2142857143 |
| <b>FERMT1</b>  | 0.1904761905  | 0.1904761905  | 0.0555555556 | 0.0555555556 | 3.294117647  | 3.428571429  |
| <b>FERMT2</b>  | 0.04761904762 | 0.04761904762 | 0            | 0            | inf          | 4.7619E+31   |
| <b>FES</b>     | 0.04761904762 | 0.04761904762 | 0.0555555556 | 0.0555555556 | 0.7          | 0.8571428571 |
| <b>FETUB</b>   | 0.09523809524 | 0.09523809524 | 0.0555555556 | 0.0555555556 | 1.473684211  | 1.714285714  |
| <b>FEV</b>     | 0             | 0             | 0.0555555556 | 0.0555555556 | 0            | 0            |
| <b>FEZ2</b>    | 0             | 0             | 0.0555555556 | 0.0555555556 | 0            | 0            |
| <b>FEZF1</b>   | 0.04761904762 | 0.04761904762 | 0.0555555556 | 0.0555555556 | 0.7          | 0.8571428571 |
| <b>EZF1-AS</b> | 0.04761904762 | 0.04761904762 | 0.0555555556 | 0.0555555556 | 0.7          | 0.8571428571 |
| <b>FEZF2</b>   | 0.04761904762 | 0.04761904762 | 0            | 0            | inf          | 4.7619E+31   |
| <b>FFAR1</b>   | 0.04761904762 | 0.04761904762 | 0.0555555556 | 0.0555555556 | 0.7          | 0.8571428571 |
| <b>FFAR2</b>   | 0.04761904762 | 0.04761904762 | 0.0555555556 | 0.0555555556 | 0.7          | 0.8571428571 |
| <b>FFAR3</b>   | 0.04761904762 | 0.04761904762 | 0.0555555556 | 0.0555555556 | 0.7          | 0.8571428571 |
| <b>FFAR4</b>   | 0.1428571429  | 0.1428571429  | 0.0555555556 | 0.0555555556 | 2.333333333  | 2.571428571  |
| <b>FGA</b>     | 0             | 0             | 0.0555555556 | 0.0555555556 | 0            | 0            |
| <b>FGB</b>     | 0             | 0             | 0.0555555556 | 0.0555555556 | 0            | 0            |
| <b>FGD2</b>    | 0.04761904762 | 0.04761904762 | 0.0555555556 | 0.0555555556 | 0.7          | 0.8571428571 |
| <b>FGD3</b>    | 0.04761904762 | 0.04761904762 | 0.0555555556 | 0.0555555556 | 0.7          | 0.8571428571 |
| <b>FGD4</b>    | 0.1428571429  | 0.1428571429  | 0.1111111111 | 0.1111111111 | 1.083333333  | 1.285714286  |
| <b>FGD5</b>    | 0.04761904762 | 0.04761904762 | 0            | 0            | inf          | 4.7619E+31   |
| <b>GD5-AS</b>  | 0.04761904762 | 0.04761904762 | 0            | 0            | inf          | 4.7619E+31   |
| <b>FGD5P1</b>  | 0.04761904762 | 0.04761904762 | 0            | 0            | inf          | 4.7619E+31   |
| <b>FGD6</b>    | 0.04761904762 | 0.04761904762 | 0.0555555556 | 0.0555555556 | 0.7          | 0.8571428571 |
| <b>FGF1</b>    | 0.04761904762 | 0.04761904762 | 0            | 0            | inf          | 4.7619E+31   |
| <b>FGF10</b>   | 0.04761904762 | 0.04761904762 | 0.0555555556 | 0.0555555556 | 0.7          | 0.8571428571 |
| <b>GF10-AS</b> | 0.04761904762 | 0.04761904762 | 0.0555555556 | 0.0555555556 | 0.7          | 0.8571428571 |
| <b>FGF11</b>   | 0             | 0             | 0.0555555556 | 0.0555555556 | 0            | 0            |
| <b>FGF12</b>   | 0.09523809524 | 0.09523809524 | 0.0555555556 | 0.0555555556 | 1.473684211  | 1.714285714  |

|         |               |               |               |               |              |              |
|---------|---------------|---------------|---------------|---------------|--------------|--------------|
| GF12-AS | 0.09523809524 | 0.09523809524 | 0.05555555556 | 0.05555555556 | 1.473684211  | 1.714285714  |
| GF12-AS | 0.09523809524 | 0.09523809524 | 0.05555555556 | 0.05555555556 | 1.473684211  | 1.714285714  |
| FGF17   | 0.09523809524 | 0.09523809524 | 0.11111111111 | 0.11111111111 | 0.6842105263 | 0.8571428571 |
| FGF18   | 0             | 0             | 0.05555555556 | 0.05555555556 | 0            | 0            |
| FGF2    | 0             | 0             | 0.05555555556 | 0.05555555556 | 0            | 0            |
| FGF20   | 0.09523809524 | 0.09523809524 | 0.11111111111 | 0.11111111111 | 0.6842105263 | 0.8571428571 |
| FGF21   | 0.09523809524 | 0.09523809524 | 0.11111111111 | 0.11111111111 | 0.6842105263 | 0.8571428571 |
| FGF22   | 0.09523809524 | 0.09523809524 | 0.11111111111 | 0.11111111111 | 0.6842105263 | 0.8571428571 |
| FGF23   | 0.04761904762 | 0.04761904762 | 0.11111111111 | 0.11111111111 | 0.325        | 0.4285714286 |
| FGF5    | 0.04761904762 | 0.04761904762 | 0.05555555556 | 0.05555555556 | 0.7          | 0.8571428571 |
| FGF6    | 0.04761904762 | 0.04761904762 | 0.11111111111 | 0.11111111111 | 0.325        | 0.4285714286 |
| FGF7    | 0.04761904762 | 0.04761904762 | 0.05555555556 | 0.05555555556 | 0.7          | 0.8571428571 |
| FGF7P3  | 0.1904761905  | 0.1904761905  | 0.05555555556 | 0.05555555556 | 3.294117647  | 3.428571429  |
| FGF7P6  | 0.1428571429  | 0.1428571429  | 0.05555555556 | 0.05555555556 | 2.333333333  | 2.571428571  |
| FGF8    | 0.1428571429  | 0.1428571429  | 0             | 0             | inf          | 1.42857E+32  |
| FGFBP1  | 0             | 0             | 0             | 0             |              | 0.00001      |
| FGFBP2  | 0             | 0             | 0             | 0             |              | 0.00001      |
| FGFBP3  | 0.1428571429  | 0.1428571429  | 0.11111111111 | 0.11111111111 | 1.083333333  | 1.285714286  |
| FGFR1   | 0.09523809524 | 0.09523809524 | 0.11111111111 | 0.11111111111 | 0.6842105263 | 0.8571428571 |
| GFR10F  | 0.04761904762 | 0.04761904762 | 0.05555555556 | 0.05555555556 | 0.7          | 0.8571428571 |
| FGFR2   | 0.2380952381  | 0.2380952381  | 0             | 0             | inf          | 2.38095E+32  |
| FGFR3   | 0.04761904762 | 0.04761904762 | 0             | 0             | inf          | 4.7619E+31   |
| FGFR4   | 0.09523809524 | 0.09523809524 | 0.05555555556 | 0.05555555556 | 1.473684211  | 1.714285714  |
| FGFRL1  | 0.04761904762 | 0.04761904762 | 0             | 0             | inf          | 4.7619E+31   |
| FGG     | 0             | 0             | 0.05555555556 | 0.05555555556 | 0            | 0            |
| FGGY    | 0.04761904762 | 0.04761904762 | 0.05555555556 | 0.05555555556 | 0.7          | 0.8571428571 |
| FGR     | 0.04761904762 | 0.04761904762 | 0.11111111111 | 0.11111111111 | 0.325        | 0.4285714286 |
| FH      | 0.1428571429  | 0.1428571429  | 0             | 0             | inf          | 1.42857E+32  |
| FHAD1   | 0.04761904762 | 0.04761904762 | 0.11111111111 | 0.11111111111 | 0.325        | 0.4285714286 |
| FHDC1   | 0             | 0             | 0.05555555556 | 0.05555555556 | 0            | 0            |
| FHIT    | 0.04761904762 | 0.04761904762 | 0             | 0             | inf          | 4.7619E+31   |
| FHL2    | 0             | 0             | 0.05555555556 | 0.05555555556 | 0            | 0            |
| FHL3    | 0.04761904762 | 0.04761904762 | 0.05555555556 | 0.05555555556 | 0.7          | 0.8571428571 |
| FHOD1   | 0.1428571429  | 0.1428571429  | 0.05555555556 | 0.05555555556 | 2.333333333  | 2.571428571  |
| FHOD3   | 0.04761904762 | 0.04761904762 | 0             | 0             | inf          | 4.7619E+31   |
| FIBCD1  | 0.09523809524 | 0.09523809524 | 0.05555555556 | 0.05555555556 | 1.473684211  | 1.714285714  |
| FICD    | 0.04761904762 | 0.04761904762 | 0.05555555556 | 0.05555555556 | 0.7          | 0.8571428571 |
| FIG4    | 0             | 0             | 0             | 0             |              | 0.00001      |
| FIGN    | 0             | 0             | 0.05555555556 | 0.05555555556 | 0            | 0            |
| FIGNL1  | 0.1428571429  | 0.1428571429  | 0.22222222222 | 0.22222222222 | 0.4583333333 | 0.6428571429 |
| FIGNL2  | 0.04761904762 | 0.04761904762 | 0.05555555556 | 0.05555555556 | 0.7          | 0.8571428571 |
| FILIP1L | 0.09523809524 | 0.09523809524 | 0.11111111111 | 0.11111111111 | 0.6842105263 | 0.8571428571 |
| FIP1L1  | 0.2380952381  | 0.2380952381  | 0.05555555556 | 0.05555555556 | 4.375        | 4.285714286  |
| FIS1    | 0.04761904762 | 0.04761904762 | 0.05555555556 | 0.05555555556 | 0.7          | 0.8571428571 |
| FITM2   | 0.1428571429  | 0.1428571429  | 0.16666666667 | 0.16666666667 | 0.6666666667 | 0.8571428571 |
| FIZ1    | 0.09523809524 | 0.09523809524 | 0.05555555556 | 0.05555555556 | 1.473684211  | 1.714285714  |
| FKBP10  | 0.09523809524 | 0.09523809524 | 0             | 0             | inf          | 9.52381E+31  |
| FKBP11  | 0.04761904762 | 0.04761904762 | 0.05555555556 | 0.05555555556 | 0.7          | 0.8571428571 |
| FKBP14  | 0.04761904762 | 0.04761904762 | 0.16666666667 | 0.16666666667 | 0.2          | 0.2857142857 |
| FKBP15  | 0.04761904762 | 0.04761904762 | 0.05555555556 | 0.05555555556 | 0.7          | 0.8571428571 |
| FKBP1A  | 0.1904761905  | 0.1904761905  | 0.11111111111 | 0.11111111111 | 1.529411765  | 1.714285714  |

|         |               |               |              |              |              |              |
|---------|---------------|---------------|--------------|--------------|--------------|--------------|
| PIA-SDC | 0.1904761905  | 0.1904761905  | 0.1111111111 | 0.1111111111 | 1.529411765  | 1.714285714  |
| KBPIAP  | 0.1428571429  | 0.1428571429  | 0.0555555556 | 0.0555555556 | 2.333333333  | 2.571428571  |
| FKBP3   | 0.04761904762 | 0.04761904762 | 0            | 0            | inf          | 4.7619E+31   |
| FKBP4   | 0.04761904762 | 0.04761904762 | 0.1666666667 | 0.1666666667 | 0.2          | 0.2857142857 |
| FKBP5   | 0.04761904762 | 0.04761904762 | 0.0555555556 | 0.0555555556 | 0.7          | 0.8571428571 |
| FKBP6   | 0.1428571429  | 0.1428571429  | 0.1111111111 | 0.1111111111 | 1.083333333  | 1.285714286  |
| FKBP7   | 0             | 0             | 0.1111111111 | 0.1111111111 | 0            | 0            |
| FKBP8   | 0.1428571429  | 0.1428571429  | 0.1111111111 | 0.1111111111 | 1.083333333  | 1.285714286  |
| FKBP9   | 0.04761904762 | 0.04761904762 | 0.1666666667 | 0.1666666667 | 0.2          | 0.2857142857 |
| KBP9P   | 0.3333333333  | 0.3333333333  | 0.2222222222 | 0.2222222222 | 1.375        | 1.5          |
| FKBPL   | 0.04761904762 | 0.04761904762 | 0            | 0            | inf          | 4.7619E+31   |
| FKRP    | 0.09523809524 | 0.09523809524 | 0.1111111111 | 0.1111111111 | 0.6842105263 | 0.8571428571 |
| FKTN    | 0.04761904762 | 0.04761904762 | 0.0555555556 | 0.0555555556 | 0.7          | 0.8571428571 |
| FLACC1  | 0             | 0             | 0.0555555556 | 0.0555555556 | 0            | 0            |
| FLAD1   | 0.1904761905  | 0.1904761905  | 0.1111111111 | 0.1111111111 | 1.529411765  | 1.714285714  |
| FLCN    | 0.04761904762 | 0.04761904762 | 0.1111111111 | 0.1111111111 | 0.325        | 0.4285714286 |
| FLG     | 0.1904761905  | 0.1904761905  | 0            | 0            | inf          | 1.90476E+32  |
| FLG-AS1 | 0.1904761905  | 0.1904761905  | 0            | 0            | inf          | 1.90476E+32  |
| FLG2    | 0.1904761905  | 0.1904761905  | 0            | 0            | inf          | 1.90476E+32  |
| LJ12825 | 0.04761904762 | 0.04761904762 | 0.0555555556 | 0.0555555556 | 0.7          | 0.8571428571 |
| LJ13224 | 0.1428571429  | 0.1428571429  | 0.1111111111 | 0.1111111111 | 1.083333333  | 1.285714286  |
| LJ16779 | 0.1428571429  | 0.1428571429  | 0.2222222222 | 0.2222222222 | 0.4583333333 | 0.6428571429 |
| LJ20021 | 0             | 0             | 0.0555555556 | 0.0555555556 | 0            | 0            |
| LJ25758 | 0.1428571429  | 0.1428571429  | 0.0555555556 | 0.0555555556 | 2.333333333  | 2.571428571  |
| LJ30679 | 0.04761904762 | 0.04761904762 | 0            | 0            | inf          | 4.7619E+31   |
| LJ30901 | 0             | 0             | 0.1666666667 | 0.1666666667 | 0            | 0            |
| LJ31104 | 0.04761904762 | 0.04761904762 | 0.0555555556 | 0.0555555556 | 0.7          | 0.8571428571 |
| LJ31356 | 0             | 0             | 0.0555555556 | 0.0555555556 | 0            | 0            |
| LJ32253 | 0.04761904762 | 0.04761904762 | 0.0555555556 | 0.0555555556 | 0.7          | 0.8571428571 |
| LJ33534 | 0             | 0             | 0.0555555556 | 0.0555555556 | 0            | 0            |
| LJ36000 | 0.09523809524 | 0.09523809524 | 0.0555555556 | 0.0555555556 | 1.473684211  | 1.714285714  |
| LJ37201 | 0.1428571429  | 0.1428571429  | 0.1111111111 | 0.1111111111 | 1.083333333  | 1.285714286  |
| LJ37453 | 0.04761904762 | 0.04761904762 | 0.1111111111 | 0.1111111111 | 0.325        | 0.4285714286 |
| LJ38576 | 0             | 0             | 0.0555555556 | 0.0555555556 | 0            | 0            |
| LJ39095 | 0.1428571429  | 0.1428571429  | 0            | 0            | inf          | 1.42857E+32  |
| LJ40194 | 0.1428571429  | 0.1428571429  | 0            | 0            | inf          | 1.42857E+32  |
| LJ40288 | 0.04761904762 | 0.04761904762 | 0.0555555556 | 0.0555555556 | 0.7          | 0.8571428571 |
| LJ42351 | 0             | 0             | 0.0555555556 | 0.0555555556 | 0            | 0            |
| LJ42393 | 0.09523809524 | 0.09523809524 | 0.1111111111 | 0.1111111111 | 0.6842105263 | 0.8571428571 |
| LJ42627 | 0.04761904762 | 0.04761904762 | 0.1111111111 | 0.1111111111 | 0.325        | 0.4285714286 |
| LJ42969 | 0.1904761905  | 0.1904761905  | 0.1111111111 | 0.1111111111 | 1.529411765  | 1.714285714  |
| LJ45513 | 0.09523809524 | 0.09523809524 | 0            | 0            | inf          | 9.52381E+31  |
| LJ46284 | 0.1904761905  | 0.1904761905  | 0.1111111111 | 0.1111111111 | 1.529411765  | 1.714285714  |
| LJ46875 | 0             | 0             | 0.0555555556 | 0.0555555556 | 0            | 0            |
| FLNB    | 0.09523809524 | 0.09523809524 | 0            | 0            | inf          | 9.52381E+31  |
| LNB-AS  | 0.04761904762 | 0.04761904762 | 0            | 0            | inf          | 4.7619E+31   |
| FLNC    | 0.04761904762 | 0.04761904762 | 0.0555555556 | 0.0555555556 | 0.7          | 0.8571428571 |
| LNC-AS  | 0.04761904762 | 0.04761904762 | 0.0555555556 | 0.0555555556 | 0.7          | 0.8571428571 |
| FLOT2   | 0.04761904762 | 0.04761904762 | 0.0555555556 | 0.0555555556 | 0.7          | 0.8571428571 |
| FLRT3   | 0.1904761905  | 0.1904761905  | 0.1111111111 | 0.1111111111 | 1.529411765  | 1.714285714  |
| FLT3LG  | 0.09523809524 | 0.09523809524 | 0.1111111111 | 0.1111111111 | 0.6842105263 | 0.8571428571 |

|        |               |               |               |               |              |              |
|--------|---------------|---------------|---------------|---------------|--------------|--------------|
| FLT4   | 0.09523809524 | 0.09523809524 | 0.05555555556 | 0.05555555556 | 1.473684211  | 1.714285714  |
| FLVCR1 | 0.09523809524 | 0.09523809524 | 0             | 0             | inf          | 9.52381E+31  |
| VCR1-1 | 0.09523809524 | 0.09523809524 | 0             | 0             | inf          | 9.52381E+31  |
| LYWCF  | 0.04761904762 | 0.04761904762 | 0.1111111111  | 0.1111111111  | 0.325        | 0.4285714286 |
| LYWCF  | 0.04761904762 | 0.04761904762 | 0.1111111111  | 0.1111111111  | 0.325        | 0.4285714286 |
| FMC1   | 0.04761904762 | 0.04761904762 | 0.05555555556 | 0.05555555556 | 0.7          | 0.8571428571 |
| C1-LUC | 0.04761904762 | 0.04761904762 | 0.05555555556 | 0.05555555556 | 0.7          | 0.8571428571 |
| FMN2   | 0.1428571429  | 0.1428571429  | 0             | 0             | inf          | 1.42857E+32  |
| FMNL1  | 0.1428571429  | 0.1428571429  | 0             | 0             | inf          | 1.42857E+32  |
| FMNL2  | 0             | 0             | 0.05555555556 | 0.05555555556 | 0            | 0            |
| FMNL3  | 0.04761904762 | 0.04761904762 | 0.05555555556 | 0.05555555556 | 0.7          | 0.8571428571 |
| FMO1   | 0.1428571429  | 0.1428571429  | 0.05555555556 | 0.05555555556 | 2.333333333  | 2.571428571  |
| FMO2   | 0.1428571429  | 0.1428571429  | 0.05555555556 | 0.05555555556 | 2.333333333  | 2.571428571  |
| FMO3   | 0.1428571429  | 0.1428571429  | 0.05555555556 | 0.05555555556 | 2.333333333  | 2.571428571  |
| FMO4   | 0.1428571429  | 0.1428571429  | 0.05555555556 | 0.05555555556 | 2.333333333  | 2.571428571  |
| FMO5   | 0.1428571429  | 0.1428571429  | 0.05555555556 | 0.05555555556 | 2.333333333  | 2.571428571  |
| FMO6P  | 0.1428571429  | 0.1428571429  | 0.05555555556 | 0.05555555556 | 2.333333333  | 2.571428571  |
| FMO9P  | 0.1428571429  | 0.1428571429  | 0             | 0             | inf          | 1.42857E+32  |
| FMOD   | 0.1428571429  | 0.1428571429  | 0             | 0             | inf          | 1.42857E+32  |
| FN1    | 0             | 0             | 0.05555555556 | 0.05555555556 | 0            | 0            |
| FN3K   | 0             | 0             | 0             | 0             |              | 0.00001      |
| FN3KRF | 0             | 0             | 0             | 0             |              | 0.00001      |
| FNBP1  | 0.09523809524 | 0.09523809524 | 0.05555555556 | 0.05555555556 | 1.473684211  | 1.714285714  |
| FNBP1L | 0.04761904762 | 0.04761904762 | 0.05555555556 | 0.05555555556 | 0.7          | 0.8571428571 |
| FNBP4  | 0             | 0             | 0.05555555556 | 0.05555555556 | 0            | 0            |
| FNDC10 | 0             | 0             | 0.1111111111  | 0.1111111111  | 0            | 0            |
| FNDC11 | 0.1428571429  | 0.1428571429  | 0.2222222222  | 0.2222222222  | 0.4583333333 | 0.6428571429 |
| FNDC3B | 0.1904761905  | 0.1904761905  | 0.1111111111  | 0.1111111111  | 1.529411765  | 1.714285714  |
| FNDC5  | 0.04761904762 | 0.04761904762 | 0.1111111111  | 0.1111111111  | 0.325        | 0.4285714286 |
| FNDC7  | 0.04761904762 | 0.04761904762 | 0.05555555556 | 0.05555555556 | 0.7          | 0.8571428571 |
| FNDC9  | 0.04761904762 | 0.04761904762 | 0.05555555556 | 0.05555555556 | 0.7          | 0.8571428571 |
| FNIP1  | 0.04761904762 | 0.04761904762 | 0             | 0             | inf          | 4.7619E+31   |
| FNIP2  | 0             | 0             | 0.05555555556 | 0.05555555556 | 0            | 0            |
| FNTA   | 0.09523809524 | 0.09523809524 | 0.1666666667  | 0.1666666667  | 0.4210526316 | 0.5714285714 |
| FOCAD  | 0.09523809524 | 0.09523809524 | 0.1111111111  | 0.1111111111  | 0.6842105263 | 0.8571428571 |
| OCAD-A | 0.04761904762 | 0.04761904762 | 0.05555555556 | 0.05555555556 | 0.7          | 0.8571428571 |
| FOPNL  | 0.04761904762 | 0.04761904762 | 0             | 0             | inf          | 4.7619E+31   |
| FOSB   | 0.09523809524 | 0.09523809524 | 0.1111111111  | 0.1111111111  | 0.6842105263 | 0.8571428571 |
| FOSL2  | 0             | 0             | 0.05555555556 | 0.05555555556 | 0            | 0            |
| FOXA2  | 0.1904761905  | 0.1904761905  | 0.05555555556 | 0.05555555556 | 3.294117647  | 3.428571429  |
| FOXA3  | 0.09523809524 | 0.09523809524 | 0.1111111111  | 0.1111111111  | 0.6842105263 | 0.8571428571 |
| FOXBI  | 0.04761904762 | 0.04761904762 | 0.05555555556 | 0.05555555556 | 0.7          | 0.8571428571 |
| FOXBI  | 0             | 0             | 0.05555555556 | 0.05555555556 | 0            | 0            |
| FOXC2  | 0.04761904762 | 0.04761904762 | 0             | 0             | inf          | 4.7619E+31   |
| DXC2-A | 0.04761904762 | 0.04761904762 | 0             | 0             | inf          | 4.7619E+31   |
| FOXD1  | 0             | 0             | 0.05555555556 | 0.05555555556 | 0            | 0            |
| FOXD2  | 0             | 0             | 0.05555555556 | 0.05555555556 | 0            | 0            |
| DXD2-A | 0             | 0             | 0.05555555556 | 0.05555555556 | 0            | 0            |
| FOXD3  | 0.04761904762 | 0.04761904762 | 0.05555555556 | 0.05555555556 | 0.7          | 0.8571428571 |
| DXD3-A | 0.04761904762 | 0.04761904762 | 0.05555555556 | 0.05555555556 | 0.7          | 0.8571428571 |
| FOXD4  | 0.04761904762 | 0.04761904762 | 0.05555555556 | 0.05555555556 | 0.7          | 0.8571428571 |

|         |               |               |               |               |              |              |
|---------|---------------|---------------|---------------|---------------|--------------|--------------|
| OXD4L   | 0             | 0             | 0.05555555556 | 0.05555555556 | 0            | 0            |
| OXD4L   | 0.09523809524 | 0.09523809524 | 0.2222222222  | 0.2222222222  | 0.2894736842 | 0.4285714286 |
| OXD4L   | 0.1904761905  | 0.1904761905  | 0.2222222222  | 0.2222222222  | 0.6470588235 | 0.8571428571 |
| OXD4L   | 0.09523809524 | 0.09523809524 | 0.2222222222  | 0.2222222222  | 0.2894736842 | 0.4285714286 |
| OXD4L   | 0.09523809524 | 0.09523809524 | 0.2222222222  | 0.2222222222  | 0.2894736842 | 0.4285714286 |
| FOX1    | 0.04761904762 | 0.04761904762 | 0             | 0             | inf          | 4.7619E+31   |
| FOX3    | 0             | 0             | 0.05555555556 | 0.05555555556 | 0            | 0            |
| FOX1    | 0.04761904762 | 0.04761904762 | 0             | 0             | inf          | 4.7619E+31   |
| FOX1    | 0.04761904762 | 0.04761904762 | 0.1666666667  | 0.1666666667  | 0.2          | 0.2857142857 |
| FOX1    | 0             | 0             | 0.05555555556 | 0.05555555556 | 0            | 0            |
| FOX2    | 0.2380952381  | 0.2380952381  | 0.05555555556 | 0.05555555556 | 4.375        | 4.285714286  |
| FOX3    | 0             | 0             | 0.05555555556 | 0.05555555556 | 0            | 0            |
| FOX1    | 0.04761904762 | 0.04761904762 | 0             | 0             | inf          | 4.7619E+31   |
| FOX2    | 0.04761904762 | 0.04761904762 | 0.1111111111  | 0.1111111111  | 0.325        | 0.4285714286 |
| FOX3    | 0.04761904762 | 0.04761904762 | 0.05555555556 | 0.05555555556 | 0.7          | 0.8571428571 |
| FOX1    | 0.04761904762 | 0.04761904762 | 0.1666666667  | 0.1666666667  | 0.2          | 0.2857142857 |
| FOX2    | 0             | 0             | 0             | 0             |              | 0.00001      |
| FOX1    | 0.04761904762 | 0.04761904762 | 0             | 0             | inf          | 4.7619E+31   |
| FOX2    | 0.1428571429  | 0.1428571429  | 0.05555555556 | 0.05555555556 | 2.333333333  | 2.571428571  |
| OXL2N   | 0.1428571429  | 0.1428571429  | 0.05555555556 | 0.05555555556 | 2.333333333  | 2.571428571  |
| FOX1    | 0.04761904762 | 0.04761904762 | 0.1666666667  | 0.1666666667  | 0.2          | 0.2857142857 |
| FOX1    | 0.04761904762 | 0.04761904762 | 0.05555555556 | 0.05555555556 | 0.7          | 0.8571428571 |
| FOX2    | 0             | 0             | 0.05555555556 | 0.05555555556 | 0            | 0            |
| FOX4    | 0             | 0             | 0.05555555556 | 0.05555555556 | 0            | 0            |
| FOX3    | 0             | 0             | 0             | 0             |              | 0.00001      |
| FOX3    | 0.04761904762 | 0.04761904762 | 0.1111111111  | 0.1111111111  | 0.325        | 0.4285714286 |
| FOX6    | 0.04761904762 | 0.04761904762 | 0.05555555556 | 0.05555555556 | 0.7          | 0.8571428571 |
| FOX1    | 0.04761904762 | 0.04761904762 | 0             | 0             | inf          | 4.7619E+31   |
| OX1-AS  | 0.04761904762 | 0.04761904762 | 0             | 0             | inf          | 4.7619E+31   |
| FOX2    | 0.04761904762 | 0.04761904762 | 0.1111111111  | 0.1111111111  | 0.325        | 0.4285714286 |
| FOX4    | 0             | 0             | 0.05555555556 | 0.05555555556 | 0            | 0            |
| OX4-AS  | 0             | 0             | 0.05555555556 | 0.05555555556 | 0            | 0            |
| OXRED   | 0             | 0             | 0.1111111111  | 0.1111111111  | 0            | 0            |
| FOX1    | 0.09523809524 | 0.09523809524 | 0.1111111111  | 0.1111111111  | 0.6842105263 | 0.8571428571 |
| FPGS    | 0.09523809524 | 0.09523809524 | 0.05555555556 | 0.05555555556 | 1.473684211  | 1.714285714  |
| FPGT    | 0.04761904762 | 0.04761904762 | 0.05555555556 | 0.05555555556 | 0.7          | 0.8571428571 |
| GT-TNN  | 0.04761904762 | 0.04761904762 | 0.05555555556 | 0.05555555556 | 0.7          | 0.8571428571 |
| FPR1    | 0.09523809524 | 0.09523809524 | 0.05555555556 | 0.05555555556 | 1.473684211  | 1.714285714  |
| FPR2    | 0.09523809524 | 0.09523809524 | 0.05555555556 | 0.05555555556 | 1.473684211  | 1.714285714  |
| FPR3    | 0.09523809524 | 0.09523809524 | 0.05555555556 | 0.05555555556 | 1.473684211  | 1.714285714  |
| RA10AC  | 0.1428571429  | 0.1428571429  | 0             | 0             | inf          | 1.42857E+32  |
| FRAS1   | 0.04761904762 | 0.04761904762 | 0.05555555556 | 0.05555555556 | 0.7          | 0.8571428571 |
| FRAT1   | 0.1428571429  | 0.1428571429  | 0             | 0             | inf          | 1.42857E+32  |
| FRAT2   | 0.1428571429  | 0.1428571429  | 0             | 0             | inf          | 1.42857E+32  |
| FREM1   | 0.1428571429  | 0.1428571429  | 0.05555555556 | 0.05555555556 | 2.333333333  | 2.571428571  |
| FREM3   | 0             | 0             | 0.05555555556 | 0.05555555556 | 0            | 0            |
| FRG1    | 0.04761904762 | 0.04761904762 | 0.05555555556 | 0.05555555556 | 0.7          | 0.8571428571 |
| FRG1-DT | 0.04761904762 | 0.04761904762 | 0.05555555556 | 0.05555555556 | 0.7          | 0.8571428571 |
| FRG1BP  | 0.09523809524 | 0.09523809524 | 0.05555555556 | 0.05555555556 | 1.473684211  | 1.714285714  |
| FRG1DP  | 0.09523809524 | 0.09523809524 | 0.05555555556 | 0.05555555556 | 1.473684211  | 1.714285714  |
| FRG1HP  | 0.09523809524 | 0.09523809524 | 0.2222222222  | 0.2222222222  | 0.2894736842 | 0.4285714286 |

|         |               |               |               |               |              |              |
|---------|---------------|---------------|---------------|---------------|--------------|--------------|
| FRG1JP  | 0.09523809524 | 0.09523809524 | 0.2222222222  | 0.2222222222  | 0.2894736842 | 0.4285714286 |
| FRG2    | 0.04761904762 | 0.04761904762 | 0.05555555556 | 0.05555555556 | 0.7          | 0.8571428571 |
| FRG2B   | 0.1904761905  | 0.1904761905  | 0             | 0             | inf          | 1.90476E+32  |
| FRG2C   | 0.04761904762 | 0.04761904762 | 0             | 0             | inf          | 4.7619E+31   |
| FRG2DF  | 0.04761904762 | 0.04761904762 | 0             | 0             | inf          | 4.7619E+31   |
| FRG2EP  | 0.04761904762 | 0.04761904762 | 0             | 0             | inf          | 4.7619E+31   |
| FRG2KP  | 0.04761904762 | 0.04761904762 | 0             | 0             | inf          | 4.7619E+31   |
| FRGCA   | 0.04761904762 | 0.04761904762 | 0.1666666667  | 0.1666666667  | 0.2          | 0.2857142857 |
| FRMD3   | 0             | 0             | 0.05555555556 | 0.05555555556 | 0            | 0            |
| FRMD4A  | 0.09523809524 | 0.09523809524 | 0.1111111111  | 0.1111111111  | 0.6842105263 | 0.8571428571 |
| FRMD4B  | 0.04761904762 | 0.04761904762 | 0             | 0             | inf          | 4.7619E+31   |
| FRMD6   | 0.04761904762 | 0.04761904762 | 0             | 0             | inf          | 4.7619E+31   |
| FRMD6-A | 0.04761904762 | 0.04761904762 | 0             | 0             | inf          | 4.7619E+31   |
| FRMD6-A | 0.04761904762 | 0.04761904762 | 0             | 0             | inf          | 4.7619E+31   |
| FRMPD   | 0.09523809524 | 0.09523809524 | 0.05555555556 | 0.05555555556 | 1.473684211  | 1.714285714  |
| FRMPD1  | 0.1428571429  | 0.1428571429  | 0.05555555556 | 0.05555555556 | 2.333333333  | 2.571428571  |
| FRMPD2  | 0.1428571429  | 0.1428571429  | 0.05555555556 | 0.05555555556 | 2.333333333  | 2.571428571  |
| FRRS1   | 0.04761904762 | 0.04761904762 | 0.05555555556 | 0.05555555556 | 0.7          | 0.8571428571 |
| FRRS1L  | 0.04761904762 | 0.04761904762 | 0.05555555556 | 0.05555555556 | 0.7          | 0.8571428571 |
| FRS2    | 0.09523809524 | 0.09523809524 | 0.1111111111  | 0.1111111111  | 0.6842105263 | 0.8571428571 |
| FRS3    | 0.04761904762 | 0.04761904762 | 0.05555555556 | 0.05555555556 | 0.7          | 0.8571428571 |
| FRYL    | 0.04761904762 | 0.04761904762 | 0.1111111111  | 0.1111111111  | 0.325        | 0.4285714286 |
| FRZB    | 0             | 0             | 0.05555555556 | 0.05555555556 | 0            | 0            |
| FSBP    | 0.1904761905  | 0.1904761905  | 0.1111111111  | 0.1111111111  | 1.529411765  | 1.714285714  |
| FSCB    | 0.04761904762 | 0.04761904762 | 0             |               | inf          | #DIV/0!      |
| FSCN1   | 0.04761904762 | 0.04761904762 | 0.1666666667  |               | 0.2          | #DIV/0!      |
| FSCN2   | 0.04761904762 | 0.04761904762 | 0             |               | inf          | #DIV/0!      |
| FSCN3   | 0.04761904762 | 0.04761904762 | 0.05555555556 |               | 0.7          | #DIV/0!      |
| FSD1    | 0.09523809524 | 0.09523809524 | 0.05555555556 |               | 1.473684211  | #DIV/0!      |
| FSD1L   | 0.04761904762 | 0.04761904762 | 0.05555555556 |               | 0.7          | #DIV/0!      |
| FSD2    | 0.04761904762 | 0.04761904762 | 0.05555555556 |               | 0.7          | #DIV/0!      |
| FSHR    | 0             | 0             | 0.05555555556 |               | 0            | #DIV/0!      |
| FSIP1   | 0             | 0             | 0             |               |              | #DIV/0!      |
| FSIP2   | 0             | 0             | 0.05555555556 |               | 0            | #DIV/0!      |
| SIP2-AS | 0             | 0             | 0.05555555556 |               | 0            | #DIV/0!      |
| SIP2-AS | 0             | 0             | 0.05555555556 |               | 0            | #DIV/0!      |
| FST     | 0.04761904762 | 0.04761904762 | 0.05555555556 |               | 0.7          | #DIV/0!      |
| FSTL1   | 0.09523809524 | 0.09523809524 | 0.05555555556 |               | 1.473684211  | #DIV/0!      |
| FSTL3   | 0.09523809524 | 0.09523809524 | 0.1111111111  |               | 0.6842105263 | #DIV/0!      |
| FSTL4   | 0.04761904762 | 0.04761904762 | 0             |               | inf          | #DIV/0!      |
| FSTL5   | 0             | 0             | 0.05555555556 |               | 0            | #DIV/0!      |
| FTCD    | 0.04761904762 | 0.04761904762 | 0.1111111111  |               | 0.325        | #DIV/0!      |
| TCD-AS  | 0.04761904762 | 0.04761904762 | 0.1111111111  |               | 0.325        | #DIV/0!      |
| TCDNL   | 0             | 0             | 0.05555555556 |               | 0            | #DIV/0!      |
| FTL     | 0.09523809524 | 0.09523809524 | 0.1111111111  |               | 0.6842105263 | #DIV/0!      |
| FTLP10  | 0.04761904762 | 0.04761904762 | 0.05555555556 |               | 0.7          | #DIV/0!      |
| FTMT    | 0.04761904762 | 0.04761904762 | 0             |               | inf          | #DIV/0!      |
| FTO     | 0.04761904762 | 0.04761904762 | 0.05555555556 |               | 0.7          | #DIV/0!      |
| FTO-IT1 | 0.04761904762 | 0.04761904762 | 0.05555555556 |               | 0.7          | #DIV/0!      |
| FTSJ3   | 0.04761904762 | 0.04761904762 | 0             |               | inf          | #DIV/0!      |
| FUBP1   | 0.04761904762 | 0.04761904762 | 0.05555555556 |               | 0.7          | #DIV/0!      |

|         |               |               |               |  |              |         |
|---------|---------------|---------------|---------------|--|--------------|---------|
| FUBP3   | 0.09523809524 | 0.09523809524 | 0.05555555556 |  | 1.473684211  | #DIV/0! |
| FUCA1   | 0.04761904762 | 0.04761904762 | 0.11111111111 |  | 0.325        | #DIV/0! |
| JNDC2F  | 0             | 0             | 0.05555555556 |  | 0            | #DIV/0! |
| FUOM    | 0.1904761905  | 0.1904761905  | 0             |  | inf          | #DIV/0! |
| FURIN   | 0.04761904762 | 0.04761904762 | 0.05555555556 |  | 0.7          | #DIV/0! |
| FUS     | 0.04761904762 | 0.04761904762 | 0             |  | inf          | #DIV/0! |
| FUT1    | 0.09523809524 | 0.09523809524 | 0.11111111111 |  | 0.6842105263 | #DIV/0! |
| FUT10   | 0.04761904762 | 0.04761904762 | 0.11111111111 |  | 0.325        | #DIV/0! |
| FUT2    | 0.09523809524 | 0.09523809524 | 0.11111111111 |  | 0.6842105263 | #DIV/0! |
| FUT3    | 0.1428571429  | 0.1428571429  | 0.05555555556 |  | 2.333333333  | #DIV/0! |
| FUT5    | 0.1428571429  | 0.1428571429  | 0.05555555556 |  | 2.333333333  | #DIV/0! |
| FUT6    | 0.1428571429  | 0.1428571429  | 0.05555555556 |  | 2.333333333  | #DIV/0! |
| FUT7    | 0.1428571429  | 0.1428571429  | 0.05555555556 |  | 2.333333333  | #DIV/0! |
| FUZ     | 0.09523809524 | 0.09523809524 | 0.11111111111 |  | 0.6842105263 | #DIV/0! |
| FXN     | 0             | 0             | 0.05555555556 |  | 0            | #DIV/0! |
| FXR1    | 0.1904761905  | 0.1904761905  | 0.05555555556 |  | 3.294117647  | #DIV/0! |
| FXR2    | 0             | 0             | 0.05555555556 |  | 0            | #DIV/0! |
| FXYD1   | 0.04761904762 | 0.04761904762 | 0.05555555556 |  | 0.7          | #DIV/0! |
| FXYD3   | 0.04761904762 | 0.04761904762 | 0.05555555556 |  | 0.7          | #DIV/0! |
| FXYD4   | 0.1428571429  | 0.1428571429  | 0.05555555556 |  | 2.333333333  | #DIV/0! |
| FXYD5   | 0.04761904762 | 0.04761904762 | 0.05555555556 |  | 0.7          | #DIV/0! |
| FXYD7   | 0.04761904762 | 0.04761904762 | 0.05555555556 |  | 0.7          | #DIV/0! |
| FYB1    | 0.04761904762 | 0.04761904762 | 0.05555555556 |  | 0.7          | #DIV/0! |
| FYB2    | 0.04761904762 | 0.04761904762 | 0.05555555556 |  | 0.7          | #DIV/0! |
| FYTTD1  | 0.1428571429  | 0.1428571429  | 0.05555555556 |  | 2.333333333  | #DIV/0! |
| FZD1    | 0.04761904762 | 0.04761904762 | 0.11111111111 |  | 0.325        | #DIV/0! |
| FZD10   | 0.09523809524 | 0.09523809524 | 0.05555555556 |  | 1.473684211  | #DIV/0! |
| ZD10-AS | 0.09523809524 | 0.09523809524 | 0.05555555556 |  | 1.473684211  | #DIV/0! |
| FZD2    | 0.09523809524 | 0.09523809524 | 0             |  | inf          | #DIV/0! |
| FZD3    | 0.04761904762 | 0.04761904762 | 0.11111111111 |  | 0.325        | #DIV/0! |
| FZD5    | 0             | 0             | 0.05555555556 |  | 0            | #DIV/0! |
| FZD6    | 0.1904761905  | 0.1904761905  | 0.11111111111 |  | 1.529411765  | #DIV/0! |
| FZD7    | 0             | 0             | 0.05555555556 |  | 0            | #DIV/0! |
| FZD8    | 0.09523809524 | 0.09523809524 | 0.16666666667 |  | 0.4210526316 | #DIV/0! |
| FZD9    | 0.1428571429  | 0.1428571429  | 0.11111111111 |  | 1.083333333  | #DIV/0! |
| FZR1    | 0.09523809524 | 0.09523809524 | 0.05555555556 |  | 1.473684211  | #DIV/0! |
| G0S2    | 0.1428571429  | 0.1428571429  | 0             |  | inf          | #DIV/0! |
| G3BP2   | 0.04761904762 | 0.04761904762 | 0.05555555556 |  | 0.7          | #DIV/0! |
| G6PC    | 0.04761904762 | 0.04761904762 | 0             |  | inf          | #DIV/0! |
| G6PC2   | 0.04761904762 | 0.04761904762 | 0.05555555556 |  | 0.7          | #DIV/0! |
| G6PC3   | 0.09523809524 | 0.09523809524 | 0             |  | inf          | #DIV/0! |
| GAA     | 0.04761904762 | 0.04761904762 | 0             |  | inf          | #DIV/0! |
| GAB1    | 0             | 0             | 0.05555555556 |  | 0            | #DIV/0! |
| GAB4    | 0.04761904762 | 0.04761904762 | 0             |  | inf          | #DIV/0! |
| ABARA   | 0             | 0             | 0.05555555556 |  | 0            | #DIV/0! |
| BARAP   | 0.04761904762 | 0.04761904762 | 0.11111111111 |  | 0.325        | #DIV/0! |
| BARAP   | 0.04761904762 | 0.04761904762 | 0             |  | inf          | #DIV/0! |
| BARAP   | 0.04761904762 | 0.04761904762 | 0.05555555556 |  | 0.7          | #DIV/0! |
| GABBR2  | 0.04761904762 | 0.04761904762 | 0             |  | inf          | #DIV/0! |
| GABPA   | 0.04761904762 | 0.04761904762 | 0.11111111111 |  | 0.325        | #DIV/0! |
| GABPB1  | 0.1428571429  | 0.1428571429  | 0.05555555556 |  | 2.333333333  | #DIV/0! |



|         |               |               |               |  |              |         |
|---------|---------------|---------------|---------------|--|--------------|---------|
| BPB1-A  | 0.1428571429  | 0.1428571429  | 0.05555555556 |  | 2.333333333  | #DIV/0! |
| BPB1-I  | 0.1428571429  | 0.1428571429  | 0.05555555556 |  | 2.333333333  | #DIV/0! |
| GABPB2  | 0.1904761905  | 0.1904761905  | 0.05555555556 |  | 3.294117647  | #DIV/0! |
| GABRA1  | 0.04761904762 | 0.04761904762 | 0.05555555556 |  | 0.7          | #DIV/0! |
| GABRA2  | 0.04761904762 | 0.04761904762 | 0             |  | inf          | #DIV/0! |
| GABRA4  | 0.04761904762 | 0.04761904762 | 0             |  | inf          | #DIV/0! |
| GABRA6  | 0.04761904762 | 0.04761904762 | 0.05555555556 |  | 0.7          | #DIV/0! |
| GABRB1  | 0.04761904762 | 0.04761904762 | 0.05555555556 |  | 0.7          | #DIV/0! |
| GABRB2  | 0.04761904762 | 0.04761904762 | 0.05555555556 |  | 0.7          | #DIV/0! |
| GABRD   | 0             | 0             | 0.1111111111  |  | 0            | #DIV/0! |
| GABRG1  | 0.04761904762 | 0.04761904762 | 0             |  | inf          | #DIV/0! |
| GABRG2  | 0.04761904762 | 0.04761904762 | 0.05555555556 |  | 0.7          | #DIV/0! |
| GABRP   | 0             | 0             | 0.05555555556 |  | 0            | #DIV/0! |
| GABRR3  | 0.04761904762 | 0.04761904762 | 0.05555555556 |  | 0.7          | #DIV/0! |
| GACAT1  | 0             | 0             | 0.05555555556 |  | 0            | #DIV/0! |
| GACAT2  | 0.09523809524 | 0.09523809524 | 0             |  | inf          | #DIV/0! |
| GACAT3  | 0             | 0             | 0.05555555556 |  | 0            | #DIV/0! |
| GAD1    | 0             | 0             | 0.05555555556 |  | 0            | #DIV/0! |
| GAD2    | 0.09523809524 | 0.09523809524 | 0.1111111111  |  | 0.6842105263 | #DIV/0! |
| GADD45  | 0.04761904762 | 0.04761904762 | 0.05555555556 |  | 0.7          | #DIV/0! |
| GADD45I | 0.09523809524 | 0.09523809524 | 0.05555555556 |  | 1.473684211  | #DIV/0! |
| GADD45C | 0.04761904762 | 0.04761904762 | 0.05555555556 |  | 0.7          | #DIV/0! |
| GDD45G  | 0.1428571429  | 0.1428571429  | 0.1111111111  |  | 1.083333333  | #DIV/0! |
| GADL1   | 0.04761904762 | 0.04761904762 | 0             |  | inf          | #DIV/0! |
| GAK     | 0.04761904762 | 0.04761904762 | 0             |  | inf          | #DIV/0! |
| GAL3ST  | 0.04761904762 | 0.04761904762 | 0.1111111111  |  | 0.325        | #DIV/0! |
| GAL3ST  | 0             | 0             | 0.05555555556 |  | 0            | #DIV/0! |
| GAL3ST  | 0.04761904762 | 0.04761904762 | 0.05555555556 |  | 0.7          | #DIV/0! |
| GALE    | 0.04761904762 | 0.04761904762 | 0.1111111111  |  | 0.325        | #DIV/0! |
| GALK1   | 0.04761904762 | 0.04761904762 | 0             |  | inf          | #DIV/0! |
| GALK2   | 0.04761904762 | 0.04761904762 | 0.05555555556 |  | 0.7          | #DIV/0! |
| GALM    | 0             | 0             | 0.05555555556 |  | 0            | #DIV/0! |
| GALNS   | 0.1904761905  | 0.1904761905  | 0             |  | inf          | #DIV/0! |
| GALNT1  | 0.09523809524 | 0.09523809524 | 0             |  | inf          | #DIV/0! |
| GALNT1  | 0.09523809524 | 0.09523809524 | 0.05555555556 |  | 1.473684211  | #DIV/0! |
| GALNT1  | 0.04761904762 | 0.04761904762 | 0             |  | inf          | #DIV/0! |
| GALNT1  | 0             | 0             | 0.05555555556 |  | 0            | #DIV/0! |
| GALNT1  | 0             | 0             | 0.05555555556 |  | 0            | #DIV/0! |
| GALNT1  | 0.04761904762 | 0.04761904762 | 0             |  | inf          | #DIV/0! |
| GALNT1  | 0.09523809524 | 0.09523809524 | 0.1111111111  |  | 0.6842105263 | #DIV/0! |
| GALNT2  | 0.1428571429  | 0.1428571429  | 0             |  | inf          | #DIV/0! |
| GALNT3  | 0             | 0             | 0.05555555556 |  | 0            | #DIV/0! |
| GALNT4  | 0.04761904762 | 0.04761904762 | 0.05555555556 |  | 0.7          | #DIV/0! |
| GALNT5  | 0             | 0             | 0.05555555556 |  | 0            | #DIV/0! |
| GALNT6  | 0.09523809524 | 0.09523809524 | 0.05555555556 |  | 1.473684211  | #DIV/0! |
| GALNT7  | 0             | 0             | 0.05555555556 |  | 0            | #DIV/0! |
| GALNT8  | 0.04761904762 | 0.04761904762 | 0.1111111111  |  | 0.325        | #DIV/0! |
| GALNT9  | 0.09523809524 | 0.09523809524 | 0.05555555556 |  | 1.473684211  | #DIV/0! |
| GALNTL  | 0.09523809524 | 0.09523809524 | 0.05555555556 |  | 1.473684211  | #DIV/0! |
| GALNTL  | 0             | 0             | 0.05555555556 |  | 0            | #DIV/0! |
| GALNTL6 | 0             | 0             | 0.05555555556 |  | 0            | #DIV/0! |

|                |               |               |               |  |              |         |
|----------------|---------------|---------------|---------------|--|--------------|---------|
| <b>GALP</b>    | 0.1428571429  | 0.1428571429  | 0.05555555556 |  | 2.333333333  | #DIV/0! |
| <b>GALR1</b>   | 0.09523809524 | 0.09523809524 | 0.05555555556 |  | 1.473684211  | #DIV/0! |
| <b>GALR2</b>   | 0.04761904762 | 0.04761904762 | 0             |  | inf          | #DIV/0! |
| <b>GALR3</b>   | 0             | 0             | 0.1111111111  |  | 0            | #DIV/0! |
| <b>GALT</b>    | 0.09523809524 | 0.09523809524 | 0.05555555556 |  | 1.473684211  | #DIV/0! |
| <b>GAMT</b>    | 0.09523809524 | 0.09523809524 | 0.1111111111  |  | 0.6842105263 | #DIV/0! |
| <b>GAN</b>     | 0.04761904762 | 0.04761904762 | 0             |  | inf          | #DIV/0! |
| <b>GAP43</b>   | 0.09523809524 | 0.09523809524 | 0.05555555556 |  | 1.473684211  | #DIV/0! |
| <b>GAPDH</b>   | 0.04761904762 | 0.04761904762 | 0.1111111111  |  | 0.325        | #DIV/0! |
| <b>GAPDHS</b>  | 0.04761904762 | 0.04761904762 | 0.05555555556 |  | 0.7          | #DIV/0! |
| <b>GAPLINC</b> | 0.09523809524 | 0.09523809524 | 0             |  | inf          | #DIV/0! |
| <b>GAPT</b>    | 0.04761904762 | 0.04761904762 | 0             |  | inf          | #DIV/0! |
| <b>GAPVD1</b>  | 0.09523809524 | 0.09523809524 | 0.05555555556 |  | 1.473684211  | #DIV/0! |
| <b>GARI</b>    | 0             | 0             | 0.05555555556 |  | 0            | #DIV/0! |
| <b>GAREM</b>   | 0.09523809524 | 0.09523809524 | 0             |  | inf          | #DIV/0! |
| <b>GARNL3</b>  | 0.09523809524 | 0.09523809524 | 0.05555555556 |  | 1.473684211  | #DIV/0! |
| <b>GARS</b>    | 0.04761904762 | 0.04761904762 | 0.1666666667  |  | 0.2          | #DIV/0! |
| <b>GARS-D</b>  | 0.04761904762 | 0.04761904762 | 0.1666666667  |  | 0.2          | #DIV/0! |
| <b>GART</b>    | 0.04761904762 | 0.04761904762 | 0.1111111111  |  | 0.325        | #DIV/0! |
| <b>GAS1</b>    | 0             | 0             | 0.05555555556 |  | 0            | #DIV/0! |
| <b>GAS1RR</b>  | 0             | 0             | 0.05555555556 |  | 0            | #DIV/0! |
| <b>GAS2L1</b>  | 0.04761904762 | 0.04761904762 | 0.1111111111  |  | 0.325        | #DIV/0! |
| <b>AS2L1P</b>  | 0.04761904762 | 0.04761904762 | 0             |  | inf          | #DIV/0! |
| <b>GAS2L2</b>  | 0.09523809524 | 0.09523809524 | 0             |  | inf          | #DIV/0! |
| <b>GAS2L3</b>  | 0.04761904762 | 0.04761904762 | 0.05555555556 |  | 0.7          | #DIV/0! |
| <b>GAS5</b>    | 0.1428571429  | 0.1428571429  | 0             |  | inf          | #DIV/0! |
| <b>AS5-AS</b>  | 0.1428571429  | 0.1428571429  | 0             |  | inf          | #DIV/0! |
| <b>GAS7</b>    | 0.04761904762 | 0.04761904762 | 0.05555555556 |  | 0.7          | #DIV/0! |
| <b>GAS8</b>    | 0.09523809524 | 0.09523809524 | 0             |  | inf          | #DIV/0! |
| <b>AS8-AS</b>  | 0.09523809524 | 0.09523809524 | 0             |  | inf          | #DIV/0! |
| <b>GASAL1</b>  | 0.1904761905  | 0.1904761905  | 0.1111111111  |  | 1.529411765  | #DIV/0! |
| <b>GASK1A</b>  | 0.04761904762 | 0.04761904762 | 0             |  | inf          | #DIV/0! |
| <b>GASK1B</b>  | 0             | 0             | 0.05555555556 |  | 0            | #DIV/0! |
| <b>GAST</b>    | 0.09523809524 | 0.09523809524 | 0             |  | inf          | #DIV/0! |
| <b>GATA2</b>   | 0.09523809524 | 0.09523809524 | 0.05555555556 |  | 1.473684211  | #DIV/0! |
| <b>ATA2-AS</b> | 0.09523809524 | 0.09523809524 | 0.05555555556 |  | 1.473684211  | #DIV/0! |
| <b>GATA3</b>   | 0.09523809524 | 0.09523809524 | 0.1111111111  |  | 0.6842105263 | #DIV/0! |
| <b>ATA3-AS</b> | 0.09523809524 | 0.09523809524 | 0.1111111111  |  | 0.6842105263 | #DIV/0! |
| <b>GATA4</b>   | 0.09523809524 | 0.09523809524 | 0.1111111111  |  | 0.6842105263 | #DIV/0! |
| <b>GATA5</b>   | 0.1428571429  | 0.1428571429  | 0.2222222222  |  | 0.4583333333 | #DIV/0! |
| <b>GATA6</b>   | 0.09523809524 | 0.09523809524 | 0.05555555556 |  | 1.473684211  | #DIV/0! |
| <b>ATA6-AS</b> | 0.09523809524 | 0.09523809524 | 0.05555555556 |  | 1.473684211  | #DIV/0! |
| <b>GATAD</b>   | 0.04761904762 | 0.04761904762 | 0.1111111111  |  | 0.325        | #DIV/0! |
| <b>ATAD2</b>   | 0.1428571429  | 0.1428571429  | 0.1111111111  |  | 1.083333333  | #DIV/0! |
| <b>ATAD2</b>   | 0.1904761905  | 0.1904761905  | 0.05555555556 |  | 3.294117647  | #DIV/0! |
| <b>GATB</b>    | 0             | 0             | 0.05555555556 |  | 0            | #DIV/0! |
| <b>GATC</b>    | 0             | 0             | 0.1111111111  |  | 0            | #DIV/0! |
| <b>GATD1</b>   | 0.04761904762 | 0.04761904762 | 0             |  | inf          | #DIV/0! |
| <b>GATD3A</b>  | 0.04761904762 | 0.04761904762 | 0.1111111111  |  | 0.325        | #DIV/0! |
| <b>GATD3B</b>  | 0.04761904762 | 0.04761904762 | 0.1111111111  |  | 0.325        | #DIV/0! |
| <b>GATM</b>    | 0.04761904762 | 0.04761904762 | 0             |  | inf          | #DIV/0! |

|               |               |               |               |  |              |         |
|---------------|---------------|---------------|---------------|--|--------------|---------|
| <b>GAU1</b>   | 0.04761904762 | 0.04761904762 | 0.1111111111  |  | 0.325        | #DIV/0! |
| <b>GBA</b>    | 0.1904761905  | 0.1904761905  | 0.1111111111  |  | 1.529411765  | #DIV/0! |
| <b>GBA2</b>   | 0.09523809524 | 0.09523809524 | 0.05555555556 |  | 1.473684211  | #DIV/0! |
| <b>GBAP1</b>  | 0.1904761905  | 0.1904761905  | 0.1111111111  |  | 1.529411765  | #DIV/0! |
| <b>GBAT2</b>  | 0.1904761905  | 0.1904761905  | 0.05555555556 |  | 3.294117647  | #DIV/0! |
| <b>GBE1</b>   | 0.04761904762 | 0.04761904762 | 0             |  | inf          | #DIV/0! |
| <b>GBF1</b>   | 0.1428571429  | 0.1428571429  | 0.05555555556 |  | 2.333333333  | #DIV/0! |
| <b>GBGT1</b>  | 0.04761904762 | 0.04761904762 | 0             |  | inf          | #DIV/0! |
| <b>GBP1</b>   | 0.04761904762 | 0.04761904762 | 0.05555555556 |  | 0.7          | #DIV/0! |
| <b>GBP1P1</b> | 0.04761904762 | 0.04761904762 | 0.05555555556 |  | 0.7          | #DIV/0! |
| <b>GBP2</b>   | 0.04761904762 | 0.04761904762 | 0.05555555556 |  | 0.7          | #DIV/0! |
| <b>GBP3</b>   | 0.04761904762 | 0.04761904762 | 0.05555555556 |  | 0.7          | #DIV/0! |
| <b>GBP4</b>   | 0.04761904762 | 0.04761904762 | 0.05555555556 |  | 0.7          | #DIV/0! |
| <b>GBP5</b>   | 0.04761904762 | 0.04761904762 | 0.05555555556 |  | 0.7          | #DIV/0! |
| <b>GBP6</b>   | 0.04761904762 | 0.04761904762 | 0.05555555556 |  | 0.7          | #DIV/0! |
| <b>GBP7</b>   | 0.04761904762 | 0.04761904762 | 0.05555555556 |  | 0.7          | #DIV/0! |
| <b>GBX1</b>   | 0.09523809524 | 0.09523809524 | 0.05555555556 |  | 1.473684211  | #DIV/0! |
| <b>GBX2</b>   | 0             | 0             | 0.05555555556 |  | 0            | #DIV/0! |
| <b>GC</b>     | 0.04761904762 | 0.04761904762 | 0.05555555556 |  | 0.7          | #DIV/0! |
| <b>GCA</b>    | 0             | 0             | 0.05555555556 |  | 0            | #DIV/0! |
| <b>GCAT</b>   | 0             | 0             | 0.1111111111  |  | 0            | #DIV/0! |
| <b>GCC1</b>   | 0.04761904762 | 0.04761904762 | 0.05555555556 |  | 0.7          | #DIV/0! |
| <b>GCC2</b>   | 0             | 0             | 0.05555555556 |  | 0            | #DIV/0! |
| <b>CC2-AS</b> | 0             | 0             | 0.05555555556 |  | 0            | #DIV/0! |
| <b>GCDH</b>   | 0.1428571429  | 0.1428571429  | 0.1111111111  |  | 1.083333333  | #DIV/0! |
| <b>GCFC2</b>  | 0             | 0             | 0.05555555556 |  | 0            | #DIV/0! |
| <b>GCG</b>    | 0             | 0             | 0.05555555556 |  | 0            | #DIV/0! |
| <b>GCGR</b>   | 0.04761904762 | 0.04761904762 | 0             |  | inf          | #DIV/0! |
| <b>GCH1</b>   | 0.04761904762 | 0.04761904762 | 0             |  | inf          | #DIV/0! |
| <b>GCK</b>    | 0.04761904762 | 0.04761904762 | 0.1666666667  |  | 0.2          | #DIV/0! |
| <b>GCLC</b>   | 0.04761904762 | 0.04761904762 | 0             |  | inf          | #DIV/0! |
| <b>GCLM</b>   | 0.04761904762 | 0.04761904762 | 0.05555555556 |  | 0.7          | #DIV/0! |
| <b>GCM1</b>   | 0.04761904762 | 0.04761904762 | 0             |  | inf          | #DIV/0! |
| <b>GCM2</b>   | 0.04761904762 | 0.04761904762 | 0             |  | inf          | #DIV/0! |
| <b>GCN1</b>   | 0             | 0             | 0.1111111111  |  | 0            | #DIV/0! |
| <b>GCNT1</b>  | 0             | 0             | 0.05555555556 |  | 0            | #DIV/0! |
| <b>GCNT3</b>  | 0.04761904762 | 0.04761904762 | 0.05555555556 |  | 0.7          | #DIV/0! |
| <b>GCNT4</b>  | 0.04761904762 | 0.04761904762 | 0             |  | inf          | #DIV/0! |
| <b>GCNT7</b>  | 0.09523809524 | 0.09523809524 | 0.1666666667  |  | 0.4210526316 | #DIV/0! |
| <b>GCOM1</b>  | 0.04761904762 | 0.04761904762 | 0.05555555556 |  | 0.7          | #DIV/0! |
| <b>GCSAM</b>  | 0.09523809524 | 0.09523809524 | 0.05555555556 |  | 1.473684211  | #DIV/0! |
| <b>GCSAM1</b> | 0.1428571429  | 0.1428571429  | 0             |  | inf          | #DIV/0! |
| <b>SAML-A</b> | 0.1428571429  | 0.1428571429  | 0             |  | inf          | #DIV/0! |
| <b>GCSH</b>   | 0.09523809524 | 0.09523809524 | 0             |  | inf          | #DIV/0! |
| <b>GCSHP3</b> | 0             | 0             | 0.05555555556 |  | 0            | #DIV/0! |
| <b>GDA</b>    | 0             | 0             | 0.05555555556 |  | 0            | #DIV/0! |
| <b>GDAP1</b>  | 0.1904761905  | 0.1904761905  | 0.1111111111  |  | 1.529411765  | #DIV/0! |
| <b>GDAP1L</b> | 0.1428571429  | 0.1428571429  | 0.1666666667  |  | 0.6666666667 | #DIV/0! |
| <b>GDAP2</b>  | 0.04761904762 | 0.04761904762 | 0.05555555556 |  | 0.7          | #DIV/0! |
| <b>GDE1</b>   | 0.04761904762 | 0.04761904762 | 0             |  | inf          | #DIV/0! |
| <b>GDF1</b>   | 0.1428571429  | 0.1428571429  | 0.1111111111  |  | 1.083333333  | #DIV/0! |

|                |               |               |               |  |              |         |
|----------------|---------------|---------------|---------------|--|--------------|---------|
| <b>GDF10</b>   | 0.1428571429  | 0.1428571429  | 0.05555555556 |  | 2.333333333  | #DIV/0! |
| <b>GDF11</b>   | 0.04761904762 | 0.04761904762 | 0.05555555556 |  | 0.7          | #DIV/0! |
| <b>GDF15</b>   | 0.1428571429  | 0.1428571429  | 0.1111111111  |  | 1.083333333  | #DIV/0! |
| <b>GDF2</b>    | 0.1428571429  | 0.1428571429  | 0.05555555556 |  | 2.333333333  | #DIV/0! |
| <b>GDF3</b>    | 0.04761904762 | 0.04761904762 | 0.1111111111  |  | 0.325        | #DIV/0! |
| <b>GDF5</b>    | 0.09523809524 | 0.09523809524 | 0.1111111111  |  | 0.6842105263 | #DIV/0! |
| <b>GDF5OS</b>  | 0.09523809524 | 0.09523809524 | 0.1111111111  |  | 0.6842105263 | #DIV/0! |
| <b>GDF6</b>    | 0.1904761905  | 0.1904761905  | 0.1666666667  |  | 0.9411764706 | #DIV/0! |
| <b>GDF7</b>    | 0             | 0             | 0.05555555556 |  | 0            | #DIV/0! |
| <b>GDF9</b>    | 0.04761904762 | 0.04761904762 | 0             |  | inf          | #DIV/0! |
| <b>GDI2</b>    | 0.09523809524 | 0.09523809524 | 0.1111111111  |  | 0.6842105263 | #DIV/0! |
| <b>GDNF</b>    | 0.04761904762 | 0.04761904762 | 0.05555555556 |  | 0.7          | #DIV/0! |
| <b>DNF-AS</b>  | 0.04761904762 | 0.04761904762 | 0.05555555556 |  | 0.7          | #DIV/0! |
| <b>GDPD1</b>   | 0.1428571429  | 0.1428571429  | 0             |  | inf          | #DIV/0! |
| <b>GDPD3</b>   | 0.04761904762 | 0.04761904762 | 0             |  | inf          | #DIV/0! |
| <b>GDPGP1</b>  | 0.04761904762 | 0.04761904762 | 0.05555555556 |  | 0.7          | #DIV/0! |
| <b>GEM</b>     | 0.1904761905  | 0.1904761905  | 0.1111111111  |  | 1.529411765  | #DIV/0! |
| <b>GEMIN2</b>  | 0.04761904762 | 0.04761904762 | 0.05555555556 |  | 0.7          | #DIV/0! |
| <b>GEMIN5</b>  | 0             | 0             | 0.05555555556 |  | 0            | #DIV/0! |
| <b>GEMIN6</b>  | 0             | 0             | 0.05555555556 |  | 0            | #DIV/0! |
| <b>GEMIN7</b>  | 0.09523809524 | 0.09523809524 | 0.1111111111  |  | 0.6842105263 | #DIV/0! |
| <b>MIN7-A</b>  | 0.09523809524 | 0.09523809524 | 0.1111111111  |  | 0.6842105263 | #DIV/0! |
| <b>EMIN8B</b>  | 0.04761904762 | 0.04761904762 | 0.05555555556 |  | 0.7          | #DIV/0! |
| <b>GEN1</b>    | 0             | 0             | 0.05555555556 |  | 0            | #DIV/0! |
| <b>GET4</b>    | 0.04761904762 | 0.04761904762 | 0.1666666667  |  | 0.2          | #DIV/0! |
| <b>GFAP</b>    | 0.1428571429  | 0.1428571429  | 0             |  | inf          | #DIV/0! |
| <b>GFER</b>    | 0.09523809524 | 0.09523809524 | 0.2222222222  |  | 0.2894736842 | #DIV/0! |
| <b>GFI1</b>    | 0.04761904762 | 0.04761904762 | 0.05555555556 |  | 0.7          | #DIV/0! |
| <b>GFI1B</b>   | 0.04761904762 | 0.04761904762 | 0             |  | inf          | #DIV/0! |
| <b>GFM1</b>    | 0.1428571429  | 0.1428571429  | 0.05555555556 |  | 2.333333333  | #DIV/0! |
| <b>GFM2</b>    | 0.04761904762 | 0.04761904762 | 0.05555555556 |  | 0.7          | #DIV/0! |
| <b>GFOD2</b>   | 0.1428571429  | 0.1428571429  | 0.05555555556 |  | 2.333333333  | #DIV/0! |
| <b>GFPT1</b>   | 0             | 0             | 0.05555555556 |  | 0            | #DIV/0! |
| <b>GFPT2</b>   | 0.09523809524 | 0.09523809524 | 0.05555555556 |  | 1.473684211  | #DIV/0! |
| <b>GFRA1</b>   | 0.2380952381  | 0.2380952381  | 0             |  | inf          | #DIV/0! |
| <b>GFRA2</b>   | 0.09523809524 | 0.09523809524 | 0.1111111111  |  | 0.6842105263 | #DIV/0! |
| <b>GFRA3</b>   | 0.04761904762 | 0.04761904762 | 0             |  | inf          | #DIV/0! |
| <b>GFRA4</b>   | 0.1904761905  | 0.1904761905  | 0.05555555556 |  | 3.294117647  | #DIV/0! |
| <b>GFRAL</b>   | 0.04761904762 | 0.04761904762 | 0             |  | inf          | #DIV/0! |
| <b>GFY</b>     | 0.09523809524 | 0.09523809524 | 0.1111111111  |  | 0.6842105263 | #DIV/0! |
| <b>GGA1</b>    | 0             | 0             | 0.1111111111  |  | 0            | #DIV/0! |
| <b>GGA2</b>    | 0.04761904762 | 0.04761904762 | 0             |  | inf          | #DIV/0! |
| <b>GGA3</b>    | 0.04761904762 | 0.04761904762 | 0.05555555556 |  | 0.7          | #DIV/0! |
| <b>GGCT</b>    | 0.04761904762 | 0.04761904762 | 0.1666666667  |  | 0.2          | #DIV/0! |
| <b>GGCX</b>    | 0             | 0             | 0.05555555556 |  | 0            | #DIV/0! |
| <b>GGH</b>     | 0.1428571429  | 0.1428571429  | 0.1666666667  |  | 0.6666666667 | #DIV/0! |
| <b>GGN</b>     | 0.04761904762 | 0.04761904762 | 0.05555555556 |  | 0.7          | #DIV/0! |
| <b>GGNBPI</b>  | 0.04761904762 | 0.04761904762 | 0             |  | inf          | #DIV/0! |
| <b>GGNBPI2</b> | 0.04761904762 | 0.04761904762 | 0             |  | inf          | #DIV/0! |
| <b>GGPS1</b>   | 0.1428571429  | 0.1428571429  | 0.05555555556 |  | 2.333333333  | #DIV/0! |
| <b>GGT1</b>    | 0.04761904762 | 0.04761904762 | 0.1111111111  |  | 0.325        | #DIV/0! |

|                |               |               |               |  |              |         |
|----------------|---------------|---------------|---------------|--|--------------|---------|
| <b>GGT2</b>    | 0.04761904762 | 0.04761904762 | 0.05555555556 |  | 0.7          | #DIV/0! |
| <b>GGT3P</b>   | 0.04761904762 | 0.04761904762 | 0.05555555556 |  | 0.7          | #DIV/0! |
| <b>GGT5</b>    | 0.04761904762 | 0.04761904762 | 0.11111111111 |  | 0.325        | #DIV/0! |
| <b>GGT6</b>    | 0             | 0             | 0.11111111111 |  | 0            | #DIV/0! |
| <b>GGT7</b>    | 0.09523809524 | 0.09523809524 | 0.11111111111 |  | 0.6842105263 | #DIV/0! |
| <b>GGT8P</b>   | 0.04761904762 | 0.04761904762 | 0.05555555556 |  | 0.7          | #DIV/0! |
| <b>GGTA10</b>  | 0.09523809524 | 0.09523809524 | 0.05555555556 |  | 1.473684211  | #DIV/0! |
| <b>GGTLC1</b>  | 0.1904761905  | 0.1904761905  | 0.05555555556 |  | 3.294117647  | #DIV/0! |
| <b>GGTLC2</b>  | 0.04761904762 | 0.04761904762 | 0.05555555556 |  | 0.7          | #DIV/0! |
| <b>GGTLC3</b>  | 0.04761904762 | 0.04761904762 | 0.05555555556 |  | 0.7          | #DIV/0! |
| <b>GH1</b>     | 0.04761904762 | 0.04761904762 | 0             |  | inf          | #DIV/0! |
| <b>GH2</b>     | 0.04761904762 | 0.04761904762 | 0             |  | inf          | #DIV/0! |
| <b>GHDC</b>    | 0.04761904762 | 0.04761904762 | 0             |  | inf          | #DIV/0! |
| <b>GHET1</b>   | 0.09523809524 | 0.09523809524 | 0.05555555556 |  | 1.473684211  | #DIV/0! |
| <b>GHITM</b>   | 0.1428571429  | 0.1428571429  | 0             |  | inf          | #DIV/0! |
| <b>GHR</b>     | 0.04761904762 | 0.04761904762 | 0.05555555556 |  | 0.7          | #DIV/0! |
| <b>GHRH</b>    | 0.09523809524 | 0.09523809524 | 0.16666666667 |  | 0.4210526316 | #DIV/0! |
| <b>GHRHR</b>   | 0.04761904762 | 0.04761904762 | 0.11111111111 |  | 0.325        | #DIV/0! |
| <b>GHRL</b>    | 0.09523809524 | 0.09523809524 | 0             |  | inf          | #DIV/0! |
| <b>GHRLOS</b>  | 0.09523809524 | 0.09523809524 | 0             |  | inf          | #DIV/0! |
| <b>GHSR</b>    | 0.1904761905  | 0.1904761905  | 0.11111111111 |  | 1.529411765  | #DIV/0! |
| <b>GID4</b>    | 0.04761904762 | 0.04761904762 | 0.11111111111 |  | 0.325        | #DIV/0! |
| <b>GID8</b>    | 0.1428571429  | 0.1428571429  | 0.22222222222 |  | 0.4583333333 | #DIV/0! |
| <b>GIGYF1</b>  | 0.04761904762 | 0.04761904762 | 0.05555555556 |  | 0.7          | #DIV/0! |
| <b>GIGYF2</b>  | 0             | 0             | 0.05555555556 |  | 0            | #DIV/0! |
| <b>GIHCG</b>   | 0.1428571429  | 0.1428571429  | 0.05555555556 |  | 2.333333333  | #DIV/0! |
| <b>GIMAP10</b> | 0.09523809524 | 0.09523809524 | 0.05555555556 |  | 1.473684211  | #DIV/0! |
| <b>AP1-GIM</b> | 0.09523809524 | 0.09523809524 | 0.05555555556 |  | 1.473684211  | #DIV/0! |
| <b>GIMAP2</b>  | 0.09523809524 | 0.09523809524 | 0.05555555556 |  | 1.473684211  | #DIV/0! |
| <b>GIMAP4</b>  | 0.09523809524 | 0.09523809524 | 0.05555555556 |  | 1.473684211  | #DIV/0! |
| <b>GIMAP5</b>  | 0.09523809524 | 0.09523809524 | 0.05555555556 |  | 1.473684211  | #DIV/0! |
| <b>GIMAP6</b>  | 0.09523809524 | 0.09523809524 | 0.05555555556 |  | 1.473684211  | #DIV/0! |
| <b>GIMAP7</b>  | 0.09523809524 | 0.09523809524 | 0.05555555556 |  | 1.473684211  | #DIV/0! |
| <b>GIMAP8</b>  | 0.09523809524 | 0.09523809524 | 0.05555555556 |  | 1.473684211  | #DIV/0! |
| <b>GIMD1</b>   | 0             | 0             | 0.05555555556 |  | 0            | #DIV/0! |
| <b>GIN1</b>    | 0.04761904762 | 0.04761904762 | 0             |  | inf          | #DIV/0! |
| <b>GINM1</b>   | 0             | 0             | 0             |  |              | #DIV/0! |
| <b>GINS1</b>   | 0.1904761905  | 0.1904761905  | 0.05555555556 |  | 3.294117647  | #DIV/0! |
| <b>GINS2</b>   | 0.04761904762 | 0.04761904762 | 0             |  | inf          | #DIV/0! |
| <b>GINS3</b>   | 0.04761904762 | 0.04761904762 | 0             |  | inf          | #DIV/0! |
| <b>GINS4</b>   | 0.09523809524 | 0.09523809524 | 0.16666666667 |  | 0.4210526316 | #DIV/0! |
| <b>GIP</b>     | 0.1428571429  | 0.1428571429  | 0             |  | inf          | #DIV/0! |
| <b>GIPC1</b>   | 0.1428571429  | 0.1428571429  | 0.11111111111 |  | 1.083333333  | #DIV/0! |
| <b>GIPC2</b>   | 0.04761904762 | 0.04761904762 | 0.05555555556 |  | 0.7          | #DIV/0! |
| <b>GIPC3</b>   | 0.09523809524 | 0.09523809524 | 0.05555555556 |  | 1.473684211  | #DIV/0! |
| <b>GIPR</b>    | 0.09523809524 | 0.09523809524 | 0.11111111111 |  | 0.6842105263 | #DIV/0! |
| <b>GIT1</b>    | 0             | 0             | 0.05555555556 |  | 0            | #DIV/0! |
| <b>GIT2</b>    | 0             | 0             | 0.11111111111 |  | 0            | #DIV/0! |
| <b>GJA1</b>    | 0             | 0             | 0.05555555556 |  | 0            | #DIV/0! |
| <b>GJA10</b>   | 0             | 0             | 0             |  |              | #DIV/0! |
| <b>GJA3</b>    | 0.04761904762 | 0.04761904762 | 0             |  | inf          | #DIV/0! |

|         |               |               |               |  |              |         |
|---------|---------------|---------------|---------------|--|--------------|---------|
| GJA4    | 0.04761904762 | 0.04761904762 | 0             |  | inf          | #DIV/0! |
| GJA5    | 0.1428571429  | 0.1428571429  | 0.05555555556 |  | 2.333333333  | #DIV/0! |
| GJA8    | 0.1428571429  | 0.1428571429  | 0.05555555556 |  | 2.333333333  | #DIV/0! |
| GJA9    | 0.04761904762 | 0.04761904762 | 0.05555555556 |  | 0.7          | #DIV/0! |
| A9-MYC  | 0.04761904762 | 0.04761904762 | 0.05555555556 |  | 0.7          | #DIV/0! |
| GJB2    | 0.04761904762 | 0.04761904762 | 0             |  | inf          | #DIV/0! |
| GJB3    | 0.04761904762 | 0.04761904762 | 0             |  | inf          | #DIV/0! |
| GJB4    | 0.04761904762 | 0.04761904762 | 0             |  | inf          | #DIV/0! |
| GJB5    | 0.04761904762 | 0.04761904762 | 0             |  | inf          | #DIV/0! |
| GJB6    | 0.04761904762 | 0.04761904762 | 0             |  | inf          | #DIV/0! |
| GJC1    | 0.09523809524 | 0.09523809524 | 0             |  | inf          | #DIV/0! |
| GJC2    | 0.1428571429  | 0.1428571429  | 0             |  | inf          | #DIV/0! |
| GJC3    | 0.04761904762 | 0.04761904762 | 0.05555555556 |  | 0.7          | #DIV/0! |
| GJD3    | 0.09523809524 | 0.09523809524 | 0             |  | inf          | #DIV/0! |
| GJD4    | 0.09523809524 | 0.09523809524 | 0.1666666667  |  | 0.4210526316 | #DIV/0! |
| GK2     | 0.04761904762 | 0.04761904762 | 0.05555555556 |  | 0.7          | #DIV/0! |
| GK3P    | 0             | 0             | 0.1111111111  |  | 0            | #DIV/0! |
| GK5     | 0.1904761905  | 0.1904761905  | 0.05555555556 |  | 3.294117647  | #DIV/0! |
| GKAP1   | 0             | 0             | 0.05555555556 |  | 0            | #DIV/0! |
| GKN1    | 0             | 0             | 0.05555555556 |  | 0            | #DIV/0! |
| GKN2    | 0             | 0             | 0.05555555556 |  | 0            | #DIV/0! |
| GMCL1   | 0             | 0             | 0.05555555556 |  | 0            | #DIV/0! |
| GMCL2   | 0.09523809524 | 0.09523809524 | 0.05555555556 |  | 1.473684211  | #DIV/0! |
| GMEB1   | 0.04761904762 | 0.04761904762 | 0.1111111111  |  | 0.325        | #DIV/0! |
| GMEB2   | 0.1428571429  | 0.1428571429  | 0.2222222222  |  | 0.4583333333 | #DIV/0! |
| GMFB    | 0.04761904762 | 0.04761904762 | 0             |  | inf          | #DIV/0! |
| GMFG    | 0.04761904762 | 0.04761904762 | 0.05555555556 |  | 0.7          | #DIV/0! |
| GMIP    | 0.1428571429  | 0.1428571429  | 0.1111111111  |  | 1.083333333  | #DIV/0! |
| GML     | 0.04761904762 | 0.04761904762 | 0.1666666667  |  | 0.2          | #DIV/0! |
| GMNC    | 0.09523809524 | 0.09523809524 | 0.05555555556 |  | 1.473684211  | #DIV/0! |
| GMNN    | 0             | 0             | 0.05555555556 |  | 0            | #DIV/0! |
| GMPPA   | 0             | 0             | 0.05555555556 |  | 0            | #DIV/0! |
| GMPPB   | 0.09523809524 | 0.09523809524 | 0             |  | inf          | #DIV/0! |
| GMPS    | 0.1904761905  | 0.1904761905  | 0.05555555556 |  | 3.294117647  | #DIV/0! |
| GNA11   | 0.09523809524 | 0.09523809524 | 0.05555555556 |  | 1.473684211  | #DIV/0! |
| GNA12   | 0.04761904762 | 0.04761904762 | 0.1666666667  |  | 0.2          | #DIV/0! |
| GNA13   | 0.04761904762 | 0.04761904762 | 0             |  | inf          | #DIV/0! |
| GNA14   | 0             | 0             | 0.05555555556 |  | 0            | #DIV/0! |
| NA14-AS | 0             | 0             | 0.05555555556 |  | 0            | #DIV/0! |
| GNA15   | 0.09523809524 | 0.09523809524 | 0.05555555556 |  | 1.473684211  | #DIV/0! |
| GNAI1   | 0.04761904762 | 0.04761904762 | 0.1111111111  |  | 0.325        | #DIV/0! |
| GNAI2   | 0.09523809524 | 0.09523809524 | 0             |  | inf          | #DIV/0! |
| GNAI3   | 0.04761904762 | 0.04761904762 | 0.05555555556 |  | 0.7          | #DIV/0! |
| GNAL    | 0.09523809524 | 0.09523809524 | 0.05555555556 |  | 1.473684211  | #DIV/0! |
| GNAO1   | 0.04761904762 | 0.04761904762 | 0             |  | inf          | #DIV/0! |
| GNAQ    | 0             | 0             | 0.05555555556 |  | 0            | #DIV/0! |
| GNAS    | 0.1428571429  | 0.1428571429  | 0.2222222222  |  | 0.4583333333 | #DIV/0! |
| NAS-AS  | 0.1428571429  | 0.1428571429  | 0.2222222222  |  | 0.4583333333 | #DIV/0! |
| GNAT1   | 0.09523809524 | 0.09523809524 | 0             |  | inf          | #DIV/0! |
| GNAT2   | 0.04761904762 | 0.04761904762 | 0.05555555556 |  | 0.7          | #DIV/0! |
| GNAT3   | 0.04761904762 | 0.04761904762 | 0.1111111111  |  | 0.325        | #DIV/0! |

|                |               |               |               |  |              |         |
|----------------|---------------|---------------|---------------|--|--------------|---------|
| <b>GNAZ</b>    | 0             | 0             | 0.05555555556 |  | 0            | #DIV/0! |
| <b>GNB1</b>    | 0             | 0             | 0.1111111111  |  | 0            | #DIV/0! |
| <b>GNB1L</b>   | 0.04761904762 | 0.04761904762 | 0.05555555556 |  | 0.7          | #DIV/0! |
| <b>GNB2</b>    | 0.04761904762 | 0.04761904762 | 0.05555555556 |  | 0.7          | #DIV/0! |
| <b>GNB3</b>    | 0.04761904762 | 0.04761904762 | 0.1111111111  |  | 0.325        | #DIV/0! |
| <b>GNB4</b>    | 0.1904761905  | 0.1904761905  | 0.05555555556 |  | 3.294117647  | #DIV/0! |
| <b>GNB5</b>    | 0.04761904762 | 0.04761904762 | 0.05555555556 |  | 0.7          | #DIV/0! |
| <b>GNE</b>     | 0.09523809524 | 0.09523809524 | 0.05555555556 |  | 1.473684211  | #DIV/0! |
| <b>GNG10</b>   | 0.04761904762 | 0.04761904762 | 0.05555555556 |  | 0.7          | #DIV/0! |
| <b>GNG11</b>   | 0.04761904762 | 0.04761904762 | 0.1111111111  |  | 0.325        | #DIV/0! |
| <b>GNG12</b>   | 0.04761904762 | 0.04761904762 | 0.05555555556 |  | 0.7          | #DIV/0! |
| <b>NG12-AS</b> | 0.04761904762 | 0.04761904762 | 0.05555555556 |  | 0.7          | #DIV/0! |
| <b>GNG13</b>   | 0.04761904762 | 0.04761904762 | 0.2222222222  |  | 0.1375       | #DIV/0! |
| <b>GNG14</b>   | 0.1428571429  | 0.1428571429  | 0.1111111111  |  | 1.083333333  | #DIV/0! |
| <b>GNG2</b>    | 0.04761904762 | 0.04761904762 | 0             |  | inf          | #DIV/0! |
| <b>GNG4</b>    | 0.1428571429  | 0.1428571429  | 0.05555555556 |  | 2.333333333  | #DIV/0! |
| <b>GNG5</b>    | 0.04761904762 | 0.04761904762 | 0.05555555556 |  | 0.7          | #DIV/0! |
| <b>GNG7</b>    | 0.09523809524 | 0.09523809524 | 0.05555555556 |  | 1.473684211  | #DIV/0! |
| <b>GNG8</b>    | 0.09523809524 | 0.09523809524 | 0.1111111111  |  | 0.6842105263 | #DIV/0! |
| <b>GNGT1</b>   | 0.04761904762 | 0.04761904762 | 0.1111111111  |  | 0.325        | #DIV/0! |
| <b>GNGT2</b>   | 0.1428571429  | 0.1428571429  | 0             |  | inf          | #DIV/0! |
| <b>GNL2</b>    | 0.04761904762 | 0.04761904762 | 0.05555555556 |  | 0.7          | #DIV/0! |
| <b>GPLY</b>    | 0             | 0             | 0.05555555556 |  | 0            | #DIV/0! |
| <b>GNMT</b>    | 0.04761904762 | 0.04761904762 | 0.05555555556 |  | 0.7          | #DIV/0! |
| <b>GNPAT</b>   | 0.1428571429  | 0.1428571429  | 0             |  | inf          | #DIV/0! |
| <b>GNPDA1</b>  | 0.04761904762 | 0.04761904762 | 0             |  | inf          | #DIV/0! |
| <b>GNPDA2</b>  | 0.04761904762 | 0.04761904762 | 0.05555555556 |  | 0.7          | #DIV/0! |
| <b>GNPNAT</b>  | 0.04761904762 | 0.04761904762 | 0             |  | inf          | #DIV/0! |
| <b>GNPTA1</b>  | 0.04761904762 | 0.04761904762 | 0.05555555556 |  | 0.7          | #DIV/0! |
| <b>GNPTG</b>   | 0.04761904762 | 0.04761904762 | 0.2222222222  |  | 0.1375       | #DIV/0! |
| <b>GNRH1</b>   | 0.04761904762 | 0.04761904762 | 0.1111111111  |  | 0.325        | #DIV/0! |
| <b>GNRH2</b>   | 0.1904761905  | 0.1904761905  | 0.05555555556 |  | 3.294117647  | #DIV/0! |
| <b>GNRHR</b>   | 0.04761904762 | 0.04761904762 | 0.05555555556 |  | 0.7          | #DIV/0! |
| <b>GNS</b>     | 0.1428571429  | 0.1428571429  | 0.05555555556 |  | 2.333333333  | #DIV/0! |
| <b>GOLGA0</b>  | 0.09523809524 | 0.09523809524 | 0.05555555556 |  | 1.473684211  | #DIV/0! |
| <b>GOLGA2</b>  | 0.09523809524 | 0.09523809524 | 0.05555555556 |  | 1.473684211  | #DIV/0! |
| <b>DLGA2P</b>  | 0.04761904762 | 0.04761904762 | 0.05555555556 |  | 0.7          | #DIV/0! |
| <b>OLGA2P</b>  | 0.04761904762 | 0.04761904762 | 0.05555555556 |  | 0.7          | #DIV/0! |
| <b>OLGA2L</b>  | 0.04761904762 | 0.04761904762 | 0.05555555556 |  | 0.7          | #DIV/0! |
| <b>OLGA2H</b>  | 0.09523809524 | 0.09523809524 | 0.2222222222  |  | 0.2894736842 | #DIV/0! |
| <b>OLGA2I</b>  | 0.04761904762 | 0.04761904762 | 0.05555555556 |  | 0.7          | #DIV/0! |
| <b>OLGA2J</b>  | 0.09523809524 | 0.09523809524 | 0             |  | inf          | #DIV/0! |
| <b>GOLGA3</b>  | 0.09523809524 | 0.09523809524 | 0.05555555556 |  | 1.473684211  | #DIV/0! |
| <b>GOLGA4</b>  | 0.04761904762 | 0.04761904762 | 0             |  | inf          | #DIV/0! |
| <b>OLGA6</b>   | 0.04761904762 | 0.04761904762 | 0.05555555556 |  | 0.7          | #DIV/0! |
| <b>OLGA6P</b>  | 0.04761904762 | 0.04761904762 | 0.05555555556 |  | 0.7          | #DIV/0! |
| <b>OLGA6L</b>  | 0.04761904762 | 0.04761904762 | 0.05555555556 |  | 0.7          | #DIV/0! |
| <b>OLGA6H</b>  | 0.04761904762 | 0.04761904762 | 0.05555555556 |  | 0.7          | #DIV/0! |
| <b>OLGA6I</b>  | 0.1904761905  | 0.1904761905  | 0             |  | inf          | #DIV/0! |
| <b>DLGA6L</b>  | 0.04761904762 | 0.04761904762 | 0.05555555556 |  | 0.7          | #DIV/0! |
| <b>LGA6L</b>   | 0.04761904762 | 0.04761904762 | 0.05555555556 |  | 0.7          | #DIV/0! |

|        |               |               |               |  |              |         |
|--------|---------------|---------------|---------------|--|--------------|---------|
| DLGA6I | 0.04761904762 | 0.04761904762 | 0             |  | inf          | #DIV/0! |
| DLGA6L | 0.1904761905  | 0.1904761905  | 0             |  | inf          | #DIV/0! |
| DLGA6I | 0.04761904762 | 0.04761904762 | 0.05555555556 |  | 0.7          | #DIV/0! |
| DLGA6I | 0.04761904762 | 0.04761904762 | 0.05555555556 |  | 0.7          | #DIV/0! |
| DLGA6L | 0.04761904762 | 0.04761904762 | 0.05555555556 |  | 0.7          | #DIV/0! |
| DLGA6I | 0.2857142857  | 0.2857142857  | 0.1111111111  |  | 2.6          | #DIV/0! |
| DLGA6I | 0.04761904762 | 0.04761904762 | 0.05555555556 |  | 0.7          | #DIV/0! |
| GOLGA7 | 0.09523809524 | 0.09523809524 | 0.1666666667  |  | 0.4210526316 | #DIV/0! |
| OLGA7  | 0.1428571429  | 0.1428571429  | 0             |  | inf          | #DIV/0! |
| DLGA8C | 0.2857142857  | 0.2857142857  | 0.1111111111  |  | 2.6          | #DIV/0! |
| DLGA8I | 0.1428571429  | 0.1428571429  | 0             |  | inf          | #DIV/0! |
| OLGA8I | 0.04761904762 | 0.04761904762 | 0             |  | inf          | #DIV/0! |
| OLGA8I | 0.09523809524 | 0.09523809524 | 0             |  | inf          | #DIV/0! |
| OLGA8I | 0.04761904762 | 0.04761904762 | 0             |  | inf          | #DIV/0! |
| GOLGBI | 0.09523809524 | 0.09523809524 | 0.05555555556 |  | 1.473684211  | #DIV/0! |
| GOLIM4 | 0.1428571429  | 0.1428571429  | 0.05555555556 |  | 2.333333333  | #DIV/0! |
| GOLM1  | 0             | 0             | 0.05555555556 |  | 0            | #DIV/0! |
| GOLPH3 | 0.04761904762 | 0.04761904762 | 0.05555555556 |  | 0.7          | #DIV/0! |
| OLPH3  | 0.1904761905  | 0.1904761905  | 0.05555555556 |  | 3.294117647  | #DIV/0! |
| GOLT1A | 0.2380952381  | 0.2380952381  | 0             |  | inf          | #DIV/0! |
| GOLT1I | 0.04761904762 | 0.04761904762 | 0.05555555556 |  | 0.7          | #DIV/0! |
| GON4L  | 0.1904761905  | 0.1904761905  | 0.1111111111  |  | 1.529411765  | #DIV/0! |
| GORAB  | 0.1428571429  | 0.1428571429  | 0.05555555556 |  | 2.333333333  | #DIV/0! |
| DRAB-A | 0.1428571429  | 0.1428571429  | 0.05555555556 |  | 2.333333333  | #DIV/0! |
| FORASP | 0.04761904762 | 0.04761904762 | 0             |  | inf          | #DIV/0! |
| FORASP | 0             | 0             | 0.05555555556 |  | 0            | #DIV/0! |
| GOSR1  | 0             | 0             | 0.05555555556 |  | 0            | #DIV/0! |
| GOSR2  | 0.1428571429  | 0.1428571429  | 0             |  | inf          | #DIV/0! |
| GOT1   | 0.1428571429  | 0.1428571429  | 0             |  | inf          | #DIV/0! |
| GOT1L1 | 0.09523809524 | 0.09523809524 | 0.1111111111  |  | 0.6842105263 | #DIV/0! |
| GOT2   | 0.04761904762 | 0.04761904762 | 0             |  | inf          | #DIV/0! |
| GP1BA  | 0             | 0             | 0.1111111111  |  | 0            | #DIV/0! |
| GP1BB  | 0.04761904762 | 0.04761904762 | 0.05555555556 |  | 0.7          | #DIV/0! |
| GP2    | 0.04761904762 | 0.04761904762 | 0             |  | inf          | #DIV/0! |
| GP5    | 0.09523809524 | 0.09523809524 | 0.05555555556 |  | 1.473684211  | #DIV/0! |
| GP6    | 0.09523809524 | 0.09523809524 | 0.05555555556 |  | 1.473684211  | #DIV/0! |
| GP9    | 0.09523809524 | 0.09523809524 | 0.05555555556 |  | 1.473684211  | #DIV/0! |
| GPA33  | 0.1428571429  | 0.1428571429  | 0             |  | inf          | #DIV/0! |
| GPAA1  | 0.04761904762 | 0.04761904762 | 0.1666666667  |  | 0.2          | #DIV/0! |
| GPAM   | 0.1428571429  | 0.1428571429  | 0.05555555556 |  | 2.333333333  | #DIV/0! |
| GPANKI | 0.04761904762 | 0.04761904762 | 0             |  | inf          | #DIV/0! |
| GPAT2  | 0             | 0             | 0.1111111111  |  | 0            | #DIV/0! |
| GPAT3  | 0             | 0             | 0.05555555556 |  | 0            | #DIV/0! |
| GPAT4  | 0.09523809524 | 0.09523809524 | 0.1666666667  |  | 0.4210526316 | #DIV/0! |
| FPATCH | 0.04761904762 | 0.04761904762 | 0.05555555556 |  | 0.7          | #DIV/0! |
| PATCH  | 0             | 0             | 0.05555555556 |  | 0            | #DIV/0! |
| FPATCH | 0.1428571429  | 0.1428571429  | 0             |  | inf          | #DIV/0! |
| FPATCH | 0.04761904762 | 0.04761904762 | 0.1111111111  |  | 0.325        | #DIV/0! |
| FPATCH | 0.1428571429  | 0.1428571429  | 0.1111111111  |  | 1.083333333  | #DIV/0! |
| FPATCH | 0.09523809524 | 0.09523809524 | 0             |  | inf          | #DIV/0! |
| GPBAR1 | 0             | 0             | 0.05555555556 |  | 0            | #DIV/0! |



|          |               |               |               |  |              |         |
|----------|---------------|---------------|---------------|--|--------------|---------|
| GPP1     | 0.04761904762 | 0.04761904762 | 0             |  | inf          | #DIV/0! |
| GPP1L    | 0.04761904762 | 0.04761904762 | 0.05555555556 |  | 0.7          | #DIV/0! |
| GPC1     | 0.04761904762 | 0.04761904762 | 0.05555555556 |  | 0.7          | #DIV/0! |
| GPC2     | 0.04761904762 | 0.04761904762 | 0.05555555556 |  | 0.7          | #DIV/0! |
| GPCPD1   | 0.1904761905  | 0.1904761905  | 0.05555555556 |  | 3.294117647  | #DIV/0! |
| GPD1     | 0.04761904762 | 0.04761904762 | 0.05555555556 |  | 0.7          | #DIV/0! |
| GPD1L    | 0.09523809524 | 0.09523809524 | 0             |  | inf          | #DIV/0! |
| GPD2     | 0             | 0             | 0.05555555556 |  | 0            | #DIV/0! |
| GPER1    | 0.04761904762 | 0.04761904762 | 0.16666666667 |  | 0.2          | #DIV/0! |
| GPI      | 0.04761904762 | 0.04761904762 | 0.05555555556 |  | 0.7          | #DIV/0! |
| GPIHBP   | 0.04761904762 | 0.04761904762 | 0.16666666667 |  | 0.2          | #DIV/0! |
| GPLD1    | 0             | 0             | 0.05555555556 |  | 0            | #DIV/0! |
| GPM6A    | 0             | 0             | 0.05555555556 |  | 0            | #DIV/0! |
| GPN2     | 0.04761904762 | 0.04761904762 | 0.11111111111 |  | 0.325        | #DIV/0! |
| GPN3     | 0             | 0             | 0.11111111111 |  | 0            | #DIV/0! |
| GPNMB    | 0.04761904762 | 0.04761904762 | 0.16666666667 |  | 0.2          | #DIV/0! |
| GPR1     | 0             | 0             | 0.05555555556 |  | 0            | #DIV/0! |
| GPR1-AS  | 0             | 0             | 0.05555555556 |  | 0            | #DIV/0! |
| GPR107   | 0.09523809524 | 0.09523809524 | 0.05555555556 |  | 1.473684211  | #DIV/0! |
| GPR108   | 0.1428571429  | 0.1428571429  | 0.05555555556 |  | 2.333333333  | #DIV/0! |
| GPR137E  | 0.1428571429  | 0.1428571429  | 0             |  | inf          | #DIV/0! |
| GPR137C  | 0.04761904762 | 0.04761904762 | 0             |  | inf          | #DIV/0! |
| GPR139   | 0.04761904762 | 0.04761904762 | 0             |  | inf          | #DIV/0! |
| GPR141   | 0.04761904762 | 0.04761904762 | 0.22222222222 |  | 0.1375       | #DIV/0! |
| GPR142   | 0.04761904762 | 0.04761904762 | 0             |  | inf          | #DIV/0! |
| GPR146   | 0.04761904762 | 0.04761904762 | 0.16666666667 |  | 0.2          | #DIV/0! |
| GPR148   | 0             | 0             | 0.05555555556 |  | 0            | #DIV/0! |
| GPR149   | 0.1904761905  | 0.1904761905  | 0.05555555556 |  | 3.294117647  | #DIV/0! |
| GPR15    | 0.04761904762 | 0.04761904762 | 0.05555555556 |  | 0.7          | #DIV/0! |
| GPR150   | 0.04761904762 | 0.04761904762 | 0             |  | inf          | #DIV/0! |
| GPR153   | 0             | 0             | 0.05555555556 |  | 0            | #DIV/0! |
| GPR155   | 0             | 0             | 0.11111111111 |  | 0            | #DIV/0! |
| GPR156   | 0.09523809524 | 0.09523809524 | 0.05555555556 |  | 1.473684211  | #DIV/0! |
| GPR157   | 0             | 0             | 0.05555555556 |  | 0            | #DIV/0! |
| GPR158   | 0.09523809524 | 0.09523809524 | 0.11111111111 |  | 0.6842105263 | #DIV/0! |
| GPR158-A | 0.09523809524 | 0.09523809524 | 0.11111111111 |  | 0.6842105263 | #DIV/0! |
| GPR160   | 0.1904761905  | 0.1904761905  | 0.05555555556 |  | 3.294117647  | #DIV/0! |
| GPR161   | 0.1428571429  | 0.1428571429  | 0             |  | inf          | #DIV/0! |
| GPR162   | 0.04761904762 | 0.04761904762 | 0.11111111111 |  | 0.325        | #DIV/0! |
| GPR17    | 0             | 0             | 0.05555555556 |  | 0            | #DIV/0! |
| GPR171   | 0.1904761905  | 0.1904761905  | 0.11111111111 |  | 1.529411765  | #DIV/0! |
| GPR176   | 0             | 0             | 0             |  |              | #DIV/0! |
| GPR182   | 0.1428571429  | 0.1428571429  | 0.05555555556 |  | 2.333333333  | #DIV/0! |
| GPR19    | 0.04761904762 | 0.04761904762 | 0.05555555556 |  | 0.7          | #DIV/0! |
| GPR20    | 0.04761904762 | 0.04761904762 | 0.22222222222 |  | 0.1375       | #DIV/0! |
| GPR21    | 0.09523809524 | 0.09523809524 | 0.05555555556 |  | 1.473684211  | #DIV/0! |
| GPR22    | 0.04761904762 | 0.04761904762 | 0.05555555556 |  | 0.7          | #DIV/0! |
| GPR25    | 0.1428571429  | 0.1428571429  | 0             |  | inf          | #DIV/0! |
| GPR26    | 0.2380952381  | 0.2380952381  | 0.05555555556 |  | 4.375        | #DIV/0! |
| GPR27    | 0.04761904762 | 0.04761904762 | 0             |  | inf          | #DIV/0! |
| GPR3     | 0.04761904762 | 0.04761904762 | 0.11111111111 |  | 0.325        | #DIV/0! |

|          |               |               |               |  |              |         |
|----------|---------------|---------------|---------------|--|--------------|---------|
| GPR32    | 0.09523809524 | 0.09523809524 | 0.05555555556 |  | 1.473684211  | #DIV/0! |
| GPR33    | 0             | 0             | 0             |  |              | #DIV/0! |
| GPR35    | 0             | 0             | 0.05555555556 |  | 0            | #DIV/0! |
| GPR37    | 0.04761904762 | 0.04761904762 | 0.05555555556 |  | 0.7          | #DIV/0! |
| GPR37L   | 0.1428571429  | 0.1428571429  | 0             |  | inf          | #DIV/0! |
| GPR39    | 0             | 0             | 0.05555555556 |  | 0            | #DIV/0! |
| GPR4     | 0.09523809524 | 0.09523809524 | 0.11111111111 |  | 0.6842105263 | #DIV/0! |
| GPR42    | 0.04761904762 | 0.04761904762 | 0.05555555556 |  | 0.7          | #DIV/0! |
| GPR45    | 0             | 0             | 0.05555555556 |  | 0            | #DIV/0! |
| GPR52    | 0.1428571429  | 0.1428571429  | 0             |  | inf          | #DIV/0! |
| GPR55    | 0             | 0             | 0.05555555556 |  | 0            | #DIV/0! |
| GPR6     | 0             | 0             | 0             |  |              | #DIV/0! |
| GPR61    | 0.04761904762 | 0.04761904762 | 0.05555555556 |  | 0.7          | #DIV/0! |
| GPR62    | 0.04761904762 | 0.04761904762 | 0             |  | inf          | #DIV/0! |
| GPR75    | 0.04761904762 | 0.04761904762 | 0.05555555556 |  | 0.7          | #DIV/0! |
| GPR75-AS | 0.04761904762 | 0.04761904762 | 0.05555555556 |  | 0.7          | #DIV/0! |
| GPR84    | 0.04761904762 | 0.04761904762 | 0.05555555556 |  | 0.7          | #DIV/0! |
| GPR85    | 0.04761904762 | 0.04761904762 | 0.05555555556 |  | 0.7          | #DIV/0! |
| GPR87    | 0.1904761905  | 0.1904761905  | 0.11111111111 |  | 1.529411765  | #DIV/0! |
| GPR88    | 0.04761904762 | 0.04761904762 | 0.05555555556 |  | 0.7          | #DIV/0! |
| GPR89A   | 0.1428571429  | 0.1428571429  | 0.05555555556 |  | 2.333333333  | #DIV/0! |
| GPR89B   | 0.1428571429  | 0.1428571429  | 0.05555555556 |  | 2.333333333  | #DIV/0! |
| GPRACK   | 0.09523809524 | 0.09523809524 | 0.05555555556 |  | 1.473684211  | #DIV/0! |
| GPRC5A   | 0.04761904762 | 0.04761904762 | 0.05555555556 |  | 0.7          | #DIV/0! |
| GPRC5B   | 0.04761904762 | 0.04761904762 | 0             |  | inf          | #DIV/0! |
| GPRC5C   | 0.04761904762 | 0.04761904762 | 0             |  | inf          | #DIV/0! |
| GPRC5D   | 0.04761904762 | 0.04761904762 | 0.05555555556 |  | 0.7          | #DIV/0! |
| GPRC5D-A | 0.04761904762 | 0.04761904762 | 0.05555555556 |  | 0.7          | #DIV/0! |
| GPRIN1   | 0.09523809524 | 0.09523809524 | 0.05555555556 |  | 1.473684211  | #DIV/0! |
| GPRIN2   | 0.1428571429  | 0.1428571429  | 0.05555555556 |  | 2.333333333  | #DIV/0! |
| GPRIN3   | 0             | 0             | 0.05555555556 |  | 0            | #DIV/0! |
| GPS1     | 0.04761904762 | 0.04761904762 | 0             |  | inf          | #DIV/0! |
| GPS2     | 0             | 0             | 0.05555555556 |  | 0            | #DIV/0! |
| GPSM1    | 0.1428571429  | 0.1428571429  | 0.05555555556 |  | 2.333333333  | #DIV/0! |
| GPSM2    | 0.04761904762 | 0.04761904762 | 0.05555555556 |  | 0.7          | #DIV/0! |
| GPSM3    | 0.04761904762 | 0.04761904762 | 0             |  | inf          | #DIV/0! |
| GPT      | 0.04761904762 | 0.04761904762 | 0.16666666667 |  | 0.2          | #DIV/0! |
| GPT2     | 0.04761904762 | 0.04761904762 | 0             |  | inf          | #DIV/0! |
| GPX1     | 0.1428571429  | 0.1428571429  | 0             |  | inf          | #DIV/0! |
| GPX4     | 0.09523809524 | 0.09523809524 | 0.11111111111 |  | 0.6842105263 | #DIV/0! |
| GPX7     | 0.04761904762 | 0.04761904762 | 0.05555555556 |  | 0.7          | #DIV/0! |
| GPX8     | 0.04761904762 | 0.04761904762 | 0.05555555556 |  | 0.7          | #DIV/0! |
| RAMD1    | 0.04761904762 | 0.04761904762 | 0.05555555556 |  | 0.7          | #DIV/0! |
| RAMD10   | 0.09523809524 | 0.09523809524 | 0.05555555556 |  | 1.473684211  | #DIV/0! |
| RAMD2    | 0.04761904762 | 0.04761904762 | 0.05555555556 |  | 0.7          | #DIV/0! |
| RAMD20   | 0.04761904762 | 0.04761904762 | 0             |  | inf          | #DIV/0! |
| RAMD     | 0             | 0             | 0.11111111111 |  | 0            | #DIV/0! |
| GRAP     | 0.04761904762 | 0.04761904762 | 0.11111111111 |  | 0.325        | #DIV/0! |
| GRAP2    | 0             | 0             | 0.11111111111 |  | 0            | #DIV/0! |
| GRAPL    | 0.04761904762 | 0.04761904762 | 0.11111111111 |  | 0.325        | #DIV/0! |
| GRASP    | 0.04761904762 | 0.04761904762 | 0.05555555556 |  | 0.7          | #DIV/0! |

|         |               |               |               |  |              |         |
|---------|---------------|---------------|---------------|--|--------------|---------|
| RASP-A  | 0.04761904762 | 0.04761904762 | 0.05555555556 |  | 0.7          | #DIV/0! |
| GRB10   | 0.1428571429  | 0.1428571429  | 0.2222222222  |  | 0.4583333333 | #DIV/0! |
| GRB14   | 0             | 0             | 0.05555555556 |  | 0            | #DIV/0! |
| GRB2    | 0.04761904762 | 0.04761904762 | 0.05555555556 |  | 0.7          | #DIV/0! |
| GRB7    | 0.09523809524 | 0.09523809524 | 0             |  | inf          | #DIV/0! |
| GREB1   | 0             | 0             | 0.05555555556 |  | 0            | #DIV/0! |
| GREB1I  | 0.04761904762 | 0.04761904762 | 0.1111111111  |  | 0.325        | #DIV/0! |
| GREM2   | 0.1428571429  | 0.1428571429  | 0             |  | inf          | #DIV/0! |
| GRHL1   | 0             | 0             | 0.05555555556 |  | 0            | #DIV/0! |
| GRHL2   | 0.1904761905  | 0.1904761905  | 0.1111111111  |  | 1.529411765  | #DIV/0! |
| GRHL3   | 0.04761904762 | 0.04761904762 | 0.1111111111  |  | 0.325        | #DIV/0! |
| GRHPR   | 0.09523809524 | 0.09523809524 | 0.05555555556 |  | 1.473684211  | #DIV/0! |
| GRIA2   | 0             | 0             | 0.05555555556 |  | 0            | #DIV/0! |
| GRID1   | 0.1428571429  | 0.1428571429  | 0.05555555556 |  | 2.333333333  | #DIV/0! |
| RID1-AS | 0.1428571429  | 0.1428571429  | 0             |  | inf          | #DIV/0! |
| GRID2   | 0             | 0             | 0.05555555556 |  | 0            | #DIV/0! |
| GRID2II | 0.04761904762 | 0.04761904762 | 0.1666666667  |  | 0.2          | #DIV/0! |
| GRIFIN  | 0.04761904762 | 0.04761904762 | 0.1666666667  |  | 0.2          | #DIV/0! |
| GRIK1   | 0.04761904762 | 0.04761904762 | 0.05555555556 |  | 0.7          | #DIV/0! |
| RIK1-AS | 0.04761904762 | 0.04761904762 | 0.05555555556 |  | 0.7          | #DIV/0! |
| RIK1-AS | 0.04761904762 | 0.04761904762 | 0.05555555556 |  | 0.7          | #DIV/0! |
| GRIK3   | 0.04761904762 | 0.04761904762 | 0             |  | inf          | #DIV/0! |
| GRIK5   | 0.04761904762 | 0.04761904762 | 0.05555555556 |  | 0.7          | #DIV/0! |
| GRIN1   | 0.1428571429  | 0.1428571429  | 0.05555555556 |  | 2.333333333  | #DIV/0! |
| GRIN2A  | 0.04761904762 | 0.04761904762 | 0             |  | inf          | #DIV/0! |
| GRIN2B  | 0.04761904762 | 0.04761904762 | 0.05555555556 |  | 0.7          | #DIV/0! |
| GRIN2C  | 0.04761904762 | 0.04761904762 | 0             |  | inf          | #DIV/0! |
| GRIN2D  | 0.09523809524 | 0.09523809524 | 0.1111111111  |  | 0.6842105263 | #DIV/0! |
| GRIN3A  | 0.04761904762 | 0.04761904762 | 0             |  | inf          | #DIV/0! |
| GRIN3B  | 0.09523809524 | 0.09523809524 | 0.1111111111  |  | 0.6842105263 | #DIV/0! |
| GRINA   | 0.04761904762 | 0.04761904762 | 0.1666666667  |  | 0.2          | #DIV/0! |
| GRIP1   | 0.09523809524 | 0.09523809524 | 0.05555555556 |  | 1.473684211  | #DIV/0! |
| GRIP2   | 0.04761904762 | 0.04761904762 | 0             |  | inf          | #DIV/0! |
| GRK3    | 0.04761904762 | 0.04761904762 | 0.05555555556 |  | 0.7          | #DIV/0! |
| GRK4    | 0.04761904762 | 0.04761904762 | 0             |  | inf          | #DIV/0! |
| GRK5    | 0.2380952381  | 0.2380952381  | 0             |  | inf          | #DIV/0! |
| GRK6    | 0.09523809524 | 0.09523809524 | 0.05555555556 |  | 1.473684211  | #DIV/0! |
| GRK7    | 0.1904761905  | 0.1904761905  | 0.05555555556 |  | 3.294117647  | #DIV/0! |
| GRM2    | 0.04761904762 | 0.04761904762 | 0             |  | inf          | #DIV/0! |
| GRM3    | 0.09523809524 | 0.09523809524 | 0.05555555556 |  | 1.473684211  | #DIV/0! |
| GRM4    | 0.04761904762 | 0.04761904762 | 0             |  | inf          | #DIV/0! |
| GRM6    | 0.09523809524 | 0.09523809524 | 0.05555555556 |  | 1.473684211  | #DIV/0! |
| GRM7    | 0.04761904762 | 0.04761904762 | 0             |  | inf          | #DIV/0! |
| RM7-AS  | 0.04761904762 | 0.04761904762 | 0             |  | inf          | #DIV/0! |
| RM7-AS  | 0.04761904762 | 0.04761904762 | 0             |  | inf          | #DIV/0! |
| RM7-AS  | 0.04761904762 | 0.04761904762 | 0             |  | inf          | #DIV/0! |
| GRM8    | 0.04761904762 | 0.04761904762 | 0.05555555556 |  | 0.7          | #DIV/0! |
| GRN     | 0.09523809524 | 0.09523809524 | 0             |  | inf          | #DIV/0! |
| GRP     | 0.09523809524 | 0.09523809524 | 0             |  | inf          | #DIV/0! |
| GRSF1   | 0.09523809524 | 0.09523809524 | 0.05555555556 |  | 1.473684211  | #DIV/0! |
| GRWD1   | 0.09523809524 | 0.09523809524 | 0.1111111111  |  | 0.6842105263 | #DIV/0! |

|          |               |               |               |  |              |         |
|----------|---------------|---------------|---------------|--|--------------|---------|
| I-124K5  | 0.04761904762 | 0.04761904762 | 0.1111111111  |  | 0.325        | #DIV/0! |
| S1-124K5 | 0.04761904762 | 0.04761904762 | 0.1111111111  |  | 0.325        | #DIV/0! |
| S1-24F4  | 0.09523809524 | 0.09523809524 | 0.1111111111  |  | 0.6842105263 | #DIV/0! |
| S1-279B7 | 0.1428571429  | 0.1428571429  | 0.05555555556 |  | 2.333333333  | #DIV/0! |
| GSAP     | 0.04761904762 | 0.04761904762 | 0.1111111111  |  | 0.325        | #DIV/0! |
| GSC2     | 0.04761904762 | 0.04761904762 | 0.05555555556 |  | 0.7          | #DIV/0! |
| GSDMA    | 0.09523809524 | 0.09523809524 | 0             |  | inf          | #DIV/0! |
| GSDMB    | 0.09523809524 | 0.09523809524 | 0             |  | inf          | #DIV/0! |
| GSDMC    | 0.04761904762 | 0.04761904762 | 0.1111111111  |  | 0.325        | #DIV/0! |
| GSDMD    | 0.04761904762 | 0.04761904762 | 0.1666666667  |  | 0.2          | #DIV/0! |
| GSDME    | 0.04761904762 | 0.04761904762 | 0.2222222222  |  | 0.1375       | #DIV/0! |
| GSE1     | 0.04761904762 | 0.04761904762 | 0             |  | inf          | #DIV/0! |
| GSG1     | 0.04761904762 | 0.04761904762 | 0.05555555556 |  | 0.7          | #DIV/0! |
| GSG1L    | 0.04761904762 | 0.04761904762 | 0             |  | inf          | #DIV/0! |
| GSK3A    | 0.04761904762 | 0.04761904762 | 0.05555555556 |  | 0.7          | #DIV/0! |
| GSK3B    | 0.09523809524 | 0.09523809524 | 0.05555555556 |  | 1.473684211  | #DIV/0! |
| GSN      | 0.09523809524 | 0.09523809524 | 0.05555555556 |  | 1.473684211  | #DIV/0! |
| GSN-AS   | 0.09523809524 | 0.09523809524 | 0.05555555556 |  | 1.473684211  | #DIV/0! |
| GSPT1    | 0.04761904762 | 0.04761904762 | 0             |  | inf          | #DIV/0! |
| GSR      | 0.04761904762 | 0.04761904762 | 0.1111111111  |  | 0.325        | #DIV/0! |
| GSS      | 0.09523809524 | 0.09523809524 | 0.1111111111  |  | 0.6842105263 | #DIV/0! |
| GSTA1    | 0.04761904762 | 0.04761904762 | 0             |  | inf          | #DIV/0! |
| GSTA2    | 0.04761904762 | 0.04761904762 | 0             |  | inf          | #DIV/0! |
| GSTA3    | 0.04761904762 | 0.04761904762 | 0             |  | inf          | #DIV/0! |
| GSTA4    | 0.04761904762 | 0.04761904762 | 0             |  | inf          | #DIV/0! |
| GSTA5    | 0.04761904762 | 0.04761904762 | 0             |  | inf          | #DIV/0! |
| GSTA7P   | 0.04761904762 | 0.04761904762 | 0             |  | inf          | #DIV/0! |
| GSTCD    | 0             | 0             | 0.05555555556 |  | 0            | #DIV/0! |
| GSTK1    | 0.04761904762 | 0.04761904762 | 0.05555555556 |  | 0.7          | #DIV/0! |
| GSTM1    | 0.04761904762 | 0.04761904762 | 0.05555555556 |  | 0.7          | #DIV/0! |
| GSTM2    | 0.04761904762 | 0.04761904762 | 0.05555555556 |  | 0.7          | #DIV/0! |
| STM2P    | 0             | 0             | 0             |  |              | #DIV/0! |
| GSTM3    | 0.04761904762 | 0.04761904762 | 0.05555555556 |  | 0.7          | #DIV/0! |
| GSTM4    | 0.04761904762 | 0.04761904762 | 0.05555555556 |  | 0.7          | #DIV/0! |
| GSTM5    | 0.04761904762 | 0.04761904762 | 0.05555555556 |  | 0.7          | #DIV/0! |
| GSTO1    | 0.1428571429  | 0.1428571429  | 0.05555555556 |  | 2.333333333  | #DIV/0! |
| GSTO2    | 0.1428571429  | 0.1428571429  | 0.05555555556 |  | 2.333333333  | #DIV/0! |
| GSTT1    | 0.04761904762 | 0.04761904762 | 0.1111111111  |  | 0.325        | #DIV/0! |
| GSTT1-AS | 0.04761904762 | 0.04761904762 | 0.1111111111  |  | 0.325        | #DIV/0! |
| GSTT2    | 0.04761904762 | 0.04761904762 | 0.1111111111  |  | 0.325        | #DIV/0! |
| GSTT2B   | 0.04761904762 | 0.04761904762 | 0.1111111111  |  | 0.325        | #DIV/0! |
| GSTT4    | 0.04761904762 | 0.04761904762 | 0.1111111111  |  | 0.325        | #DIV/0! |
| GSTTP2   | 0.04761904762 | 0.04761904762 | 0.1111111111  |  | 0.325        | #DIV/0! |
| GSX2     | 0.2380952381  | 0.2380952381  | 0.05555555556 |  | 4.375        | #DIV/0! |
| GTDC1    | 0             | 0             | 0.05555555556 |  | 0            | #DIV/0! |
| GTF2A1   | 0             | 0             | 0.05555555556 |  | 0            | #DIV/0! |
| GTF2A2   | 0.04761904762 | 0.04761904762 | 0.05555555556 |  | 0.7          | #DIV/0! |
| GTF2B    | 0.04761904762 | 0.04761904762 | 0.05555555556 |  | 0.7          | #DIV/0! |
| GTF2E1   | 0.09523809524 | 0.09523809524 | 0.05555555556 |  | 1.473684211  | #DIV/0! |
| GTF2E2   | 0.04761904762 | 0.04761904762 | 0.1111111111  |  | 0.325        | #DIV/0! |
| GTF2F1   | 0.1428571429  | 0.1428571429  | 0.05555555556 |  | 2.333333333  | #DIV/0! |

|         |               |               |              |  |              |         |
|---------|---------------|---------------|--------------|--|--------------|---------|
| GTF2H2  | 0.09523809524 | 0.09523809524 | 0.1666666667 |  | 0.4210526316 | #DIV/0! |
| TF2H2   | 0.09523809524 | 0.09523809524 | 0.1666666667 |  | 0.4210526316 | #DIV/0! |
| TF2H2C  | 0.09523809524 | 0.09523809524 | 0.1666666667 |  | 0.4210526316 | #DIV/0! |
| TF2H2C  | 0.09523809524 | 0.09523809524 | 0.1666666667 |  | 0.4210526316 | #DIV/0! |
| GTF2H3  | 0.04761904762 | 0.04761904762 | 0.1111111111 |  | 0.325        | #DIV/0! |
| GTF2I   | 0.1428571429  | 0.1428571429  | 0.1666666667 |  | 0.6666666667 | #DIV/0! |
| GTF2IP1 | 0.1428571429  | 0.1428571429  | 0.1666666667 |  | 0.6666666667 | #DIV/0! |
| TF2IP1  | 0             | 0             | 0.0555555556 |  | 0            | #DIV/0! |
| TF2IP2  | 0.1428571429  | 0.1428571429  | 0.0555555556 |  | 2.333333333  | #DIV/0! |
| TF2IP2  | 0.04761904762 | 0.04761904762 | 0.1111111111 |  | 0.325        | #DIV/0! |
| GTF2IP4 | 0.1428571429  | 0.1428571429  | 0.1666666667 |  | 0.6666666667 | #DIV/0! |
| GTF2IP7 | 0.1428571429  | 0.1428571429  | 0.1111111111 |  | 1.083333333  | #DIV/0! |
| TF2IRD  | 0.1428571429  | 0.1428571429  | 0.1111111111 |  | 1.083333333  | #DIV/0! |
| TF2IRD1 | 0.04761904762 | 0.04761904762 | 0.1111111111 |  | 0.325        | #DIV/0! |
| TF2IRD  | 0.1428571429  | 0.1428571429  | 0.1666666667 |  | 0.6666666667 | #DIV/0! |
| TF2IRD2 | 0.1428571429  | 0.1428571429  | 0.1666666667 |  | 0.6666666667 | #DIV/0! |
| GTF3C1  | 0.04761904762 | 0.04761904762 | 0            |  | inf          | #DIV/0! |
| GTF3C3  | 0             | 0             | 0.0555555556 |  | 0            | #DIV/0! |
| GTF3C4  | 0.04761904762 | 0.04761904762 | 0            |  | inf          | #DIV/0! |
| GTF3C5  | 0.04761904762 | 0.04761904762 | 0            |  | inf          | #DIV/0! |
| GTF3C6  | 0             | 0             | 0            |  |              | #DIV/0! |
| GTPBP1  | 0.04761904762 | 0.04761904762 | 0.1111111111 |  | 0.325        | #DIV/0! |
| GTPBP1  | 0.09523809524 | 0.09523809524 | 0.1111111111 |  | 0.6842105263 | #DIV/0! |
| GTPBP2  | 0.04761904762 | 0.04761904762 | 0.0555555556 |  | 0.7          | #DIV/0! |
| GTPBP3  | 0.1428571429  | 0.1428571429  | 0.1111111111 |  | 1.083333333  | #DIV/0! |
| GTPBP4  | 0.04761904762 | 0.04761904762 | 0.1111111111 |  | 0.325        | #DIV/0! |
| GTPBP8  | 0.09523809524 | 0.09523809524 | 0.0555555556 |  | 1.473684211  | #DIV/0! |
| GTSE1   | 0             | 0             | 0.1111111111 |  | 0            | #DIV/0! |
| TSE1-D  | 0             | 0             | 0.1111111111 |  | 0            | #DIV/0! |
| GTSF1   | 0.04761904762 | 0.04761904762 | 0.0555555556 |  | 0.7          | #DIV/0! |
| GTSFIL  | 0.1428571429  | 0.1428571429  | 0.1111111111 |  | 1.083333333  | #DIV/0! |
| GUCA1A  | 0.04761904762 | 0.04761904762 | 0.0555555556 |  | 0.7          | #DIV/0! |
| GUCA1B  | 0.04761904762 | 0.04761904762 | 0.0555555556 |  | 0.7          | #DIV/0! |
| GUCA1C  | 0.09523809524 | 0.09523809524 | 0.0555555556 |  | 1.473684211  | #DIV/0! |
| GUCA2A  | 0.04761904762 | 0.04761904762 | 0.0555555556 |  | 0.7          | #DIV/0! |
| GUCA2B  | 0.04761904762 | 0.04761904762 | 0.0555555556 |  | 0.7          | #DIV/0! |
| GUCD1   | 0.04761904762 | 0.04761904762 | 0.1111111111 |  | 0.325        | #DIV/0! |
| GUCY1A  | 0             | 0             | 0.1111111111 |  | 0            | #DIV/0! |
| GUCY1B  | 0             | 0             | 0.1111111111 |  | 0            | #DIV/0! |
| GUCY2C  | 0.04761904762 | 0.04761904762 | 0.1111111111 |  | 0.325        | #DIV/0! |
| GUCY2D  | 0             | 0             | 0.0555555556 |  | 0            | #DIV/0! |
| GUCY2G  | 0.1428571429  | 0.1428571429  | 0.0555555556 |  | 2.333333333  | #DIV/0! |
| GUF1    | 0.04761904762 | 0.04761904762 | 0.0555555556 |  | 0.7          | #DIV/0! |
| GUK1    | 0.1428571429  | 0.1428571429  | 0            |  | inf          | #DIV/0! |
| GULP1   | 0             | 0             | 0.1666666667 |  | 0            | #DIV/0! |
| GUSB    | 0.04761904762 | 0.04761904762 | 0.1111111111 |  | 0.325        | #DIV/0! |
| GUSBP1  | 0.04761904762 | 0.04761904762 | 0.1111111111 |  | 0.325        | #DIV/0! |
| GUSBP1  | 0.1428571429  | 0.1428571429  | 0.1666666667 |  | 0.6666666667 | #DIV/0! |
| GUSBP3  | 0.09523809524 | 0.09523809524 | 0.1666666667 |  | 0.4210526316 | #DIV/0! |
| GUSBP4  | 0.04761904762 | 0.04761904762 | 0            |  | inf          | #DIV/0! |
| GUSBP5  | 0             | 0             | 0.0555555556 |  | 0            | #DIV/0! |

|        |               |               |              |  |              |         |
|--------|---------------|---------------|--------------|--|--------------|---------|
| GUSBP9 | 0.09523809524 | 0.09523809524 | 0.1666666667 |  | 0.4210526316 | #DIV/0! |
| GVINP1 | 0.04761904762 | 0.04761904762 | 0            |  | inf          | #DIV/0! |
| GXYLT0 | 0.04761904762 | 0.04761904762 | 0.1111111111 |  | 0.325        | #DIV/0! |
| XYLT11 | 0.1904761905  | 0.1904761905  | 0.0555555556 |  | 3.294117647  | #DIV/0! |
| GXYLT2 | 0.04761904762 | 0.04761904762 | 0            |  | inf          | #DIV/0! |
| GYG1   | 0.1428571429  | 0.1428571429  | 0.1111111111 |  | 1.083333333  | #DIV/0! |
| GYP A  | 0             | 0             | 0.0555555556 |  | 0            | #DIV/0! |
| GYP B  | 0             | 0             | 0.0555555556 |  | 0            | #DIV/0! |
| GYP C  | 0             | 0             | 0.0555555556 |  | 0            | #DIV/0! |
| GYP E  | 0             | 0             | 0.0555555556 |  | 0            | #DIV/0! |
| GYS1   | 0.09523809524 | 0.09523809524 | 0.1111111111 |  | 0.6842105263 | #DIV/0! |
| GYS2   | 0.04761904762 | 0.04761904762 | 0.0555555556 |  | 0.7          | #DIV/0! |
| GZF1   | 0.1904761905  | 0.1904761905  | 0.0555555556 |  | 3.294117647  | #DIV/0! |
| GZMA   | 0.04761904762 | 0.04761904762 | 0.0555555556 |  | 0.7          | #DIV/0! |
| GZMK   | 0.04761904762 | 0.04761904762 | 0.0555555556 |  | 0.7          | #DIV/0! |
| GZMM   | 0.09523809524 | 0.09523809524 | 0.1111111111 |  | 0.6842105263 | #DIV/0! |
| H19    | 0.04761904762 | 0.04761904762 | 0            |  | inf          | #DIV/0! |
| H1F0   | 0             | 0             | 0.1111111111 |  | 0            | #DIV/0! |
| H1FNT  | 0.04761904762 | 0.04761904762 | 0.0555555556 |  | 0.7          | #DIV/0! |
| H1FOO  | 0.09523809524 | 0.09523809524 | 0.0555555556 |  | 1.473684211  | #DIV/0! |
| H1FX   | 0.09523809524 | 0.09523809524 | 0.0555555556 |  | 1.473684211  | #DIV/0! |
| 1FX-AS | 0.09523809524 | 0.09523809524 | 0.0555555556 |  | 1.473684211  | #DIV/0! |
| H2AFJ  | 0.04761904762 | 0.04761904762 | 0.1111111111 |  | 0.325        | #DIV/0! |
| H2AFV  | 0.04761904762 | 0.04761904762 | 0.2222222222 |  | 0.1375       | #DIV/0! |
| H2AFY  | 0.04761904762 | 0.04761904762 | 0            |  | inf          | #DIV/0! |
| H2AFY2 | 0.09523809524 | 0.09523809524 | 0            |  | inf          | #DIV/0! |
| H2AFZ  | 0             | 0             | 0.0555555556 |  | 0            | #DIV/0! |
| H2BFS  | 0.04761904762 | 0.04761904762 | 0.1666666667 |  | 0.2          | #DIV/0! |
| H3.Y   | 0.04761904762 | 0.04761904762 | 0.0555555556 |  | 0.7          | #DIV/0! |
| H3F3A  | 0.1428571429  | 0.1428571429  | 0.0555555556 |  | 2.333333333  | #DIV/0! |
| I3F3AP | 0.1428571429  | 0.1428571429  | 0.1666666667 |  | 0.6666666667 | #DIV/0! |
| H3F3B  | 0.04761904762 | 0.04761904762 | 0            |  | inf          | #DIV/0! |
| H3F3C  | 0.1428571429  | 0.1428571429  | 0.1111111111 |  | 1.083333333  | #DIV/0! |
| H6PD   | 0             | 0             | 0.0555555556 |  | 0            | #DIV/0! |
| HAAO   | 0             | 0             | 0.0555555556 |  | 0            | #DIV/0! |
| HABP2  | 0.1428571429  | 0.1428571429  | 0.0555555556 |  | 2.333333333  | #DIV/0! |
| HABP4  | 0.04761904762 | 0.04761904762 | 0.0555555556 |  | 0.7          | #DIV/0! |
| HACD1  | 0.09523809524 | 0.09523809524 | 0.1111111111 |  | 0.6842105263 | #DIV/0! |
| HACD2  | 0.04761904762 | 0.04761904762 | 0.0555555556 |  | 0.7          | #DIV/0! |
| HACD3  | 0.04761904762 | 0.04761904762 | 0.0555555556 |  | 0.7          | #DIV/0! |
| HACD4  | 0.09523809524 | 0.09523809524 | 0.1111111111 |  | 0.6842105263 | #DIV/0! |
| HACL1  | 0.04761904762 | 0.04761904762 | 0            |  | inf          | #DIV/0! |
| HADH   | 0             | 0             | 0.0555555556 |  | 0            | #DIV/0! |
| HAGH   | 0.09523809524 | 0.09523809524 | 0.2222222222 |  | 0.2894736842 | #DIV/0! |
| HAGHL  | 0.04761904762 | 0.04761904762 | 0.2222222222 |  | 0.1375       | #DIV/0! |
| HAL    | 0.04761904762 | 0.04761904762 | 0.0555555556 |  | 0.7          | #DIV/0! |
| HAMP   | 0.04761904762 | 0.04761904762 | 0.0555555556 |  | 0.7          | #DIV/0! |
| HAND2  | 0             | 0             | 0.0555555556 |  | 0            | #DIV/0! |
| AND2-A | 0             | 0             | 0.0555555556 |  | 0            | #DIV/0! |
| HAO1   | 0.1904761905  | 0.1904761905  | 0.1111111111 |  | 1.529411765  | #DIV/0! |
| HAO2   | 0.04761904762 | 0.04761904762 | 0.0555555556 |  | 0.7          | #DIV/0! |

|         |               |               |               |  |              |         |
|---------|---------------|---------------|---------------|--|--------------|---------|
| IAO2-IT | 0.04761904762 | 0.04761904762 | 0.05555555556 |  | 0.7          | #DIV/0! |
| HAP1    | 0.09523809524 | 0.09523809524 | 0             |  | inf          | #DIV/0! |
| IAPLN1  | 0.04761904762 | 0.04761904762 | 0.05555555556 |  | 0.7          | #DIV/0! |
| IAPLN2  | 0.1428571429  | 0.1428571429  | 0.1111111111  |  | 1.083333333  | #DIV/0! |
| IAPLN3  | 0.04761904762 | 0.04761904762 | 0.05555555556 |  | 0.7          | #DIV/0! |
| IAPLN4  | 0.1428571429  | 0.1428571429  | 0.1111111111  |  | 1.083333333  | #DIV/0! |
| HARIA   | 0.1428571429  | 0.1428571429  | 0.2222222222  |  | 0.4583333333 | #DIV/0! |
| HAR1B   | 0.1428571429  | 0.1428571429  | 0.2222222222  |  | 0.4583333333 | #DIV/0! |
| HARBI1  | 0             | 0             | 0.05555555556 |  | 0            | #DIV/0! |
| HARS    | 0.04761904762 | 0.04761904762 | 0             |  | inf          | #DIV/0! |
| HARS2   | 0.04761904762 | 0.04761904762 | 0             |  | inf          | #DIV/0! |
| HAS1    | 0.09523809524 | 0.09523809524 | 0.05555555556 |  | 1.473684211  | #DIV/0! |
| HAS2    | 0.1428571429  | 0.1428571429  | 0.1111111111  |  | 1.083333333  | #DIV/0! |
| IAS2-AS | 0.1428571429  | 0.1428571429  | 0.1111111111  |  | 1.083333333  | #DIV/0! |
| HAS3    | 0.1428571429  | 0.1428571429  | 0.05555555556 |  | 2.333333333  | #DIV/0! |
| HASPIN  | 0             | 0             | 0.1111111111  |  | 0            | #DIV/0! |
| HAT1    | 0             | 0             | 0.05555555556 |  | 0            | #DIV/0! |
| HAUS1   | 0.04761904762 | 0.04761904762 | 0.05555555556 |  | 0.7          | #DIV/0! |
| HAUS3   | 0.04761904762 | 0.04761904762 | 0             |  | inf          | #DIV/0! |
| HAUS4   | 0             | 0             | 0.05555555556 |  | 0            | #DIV/0! |
| HAUS5   | 0.04761904762 | 0.04761904762 | 0.05555555556 |  | 0.7          | #DIV/0! |
| HAUS6   | 0.04761904762 | 0.04761904762 | 0.05555555556 |  | 0.7          | #DIV/0! |
| HAUS8   | 0.1428571429  | 0.1428571429  | 0.1111111111  |  | 1.083333333  | #DIV/0! |
| IACVR1  | 0.04761904762 | 0.04761904762 | 0.05555555556 |  | 0.7          | #DIV/0! |
| AVCR11  | 0.09523809524 | 0.09523809524 | 0             |  | inf          | #DIV/0! |
| IACVR2  | 0.04761904762 | 0.04761904762 | 0.05555555556 |  | 0.7          | #DIV/0! |
| HAX1    | 0.1904761905  | 0.1904761905  | 0.05555555556 |  | 3.294117647  | #DIV/0! |
| HBA1    | 0.04761904762 | 0.04761904762 | 0.2222222222  |  | 0.1375       | #DIV/0! |
| HBA2    | 0.04761904762 | 0.04761904762 | 0.2222222222  |  | 0.1375       | #DIV/0! |
| HBEGF   | 0.04761904762 | 0.04761904762 | 0             |  | inf          | #DIV/0! |
| HBM     | 0.04761904762 | 0.04761904762 | 0.2222222222  |  | 0.1375       | #DIV/0! |
| HBPI    | 0.04761904762 | 0.04761904762 | 0.05555555556 |  | 0.7          | #DIV/0! |
| HBQ1    | 0.04761904762 | 0.04761904762 | 0.2222222222  |  | 0.1375       | #DIV/0! |
| HBZ     | 0.04761904762 | 0.04761904762 | 0.2222222222  |  | 0.1375       | #DIV/0! |
| HCAR1   | 0.04761904762 | 0.04761904762 | 0.1111111111  |  | 0.325        | #DIV/0! |
| HCAR2   | 0.04761904762 | 0.04761904762 | 0.1111111111  |  | 0.325        | #DIV/0! |
| HCAR3   | 0.04761904762 | 0.04761904762 | 0.1111111111  |  | 0.325        | #DIV/0! |
| ICCAT5  | 0.04761904762 | 0.04761904762 | 0             |  | inf          | #DIV/0! |
| ICFC1R  | 0.04761904762 | 0.04761904762 | 0.1111111111  |  | 0.325        | #DIV/0! |
| HCFC2   | 0.04761904762 | 0.04761904762 | 0.05555555556 |  | 0.7          | #DIV/0! |
| HCG11   | 0             | 0             | 0.05555555556 |  | 0            | #DIV/0! |
| CG20400 | 0             | 0             | 0.05555555556 |  | 0            | #DIV/0! |
| HCG23   | 0.04761904762 | 0.04761904762 | 0             |  | inf          | #DIV/0! |
| HCG24   | 0.04761904762 | 0.04761904762 | 0             |  | inf          | #DIV/0! |
| HCG26   | 0.04761904762 | 0.04761904762 | 0             |  | inf          | #DIV/0! |
| HCK     | 0.09523809524 | 0.09523809524 | 0.1111111111  |  | 0.6842105263 | #DIV/0! |
| HCLS1   | 0.09523809524 | 0.09523809524 | 0.05555555556 |  | 1.473684211  | #DIV/0! |
| HCN1    | 0.04761904762 | 0.04761904762 | 0.05555555556 |  | 0.7          | #DIV/0! |
| HCN2    | 0.09523809524 | 0.09523809524 | 0.1111111111  |  | 0.6842105263 | #DIV/0! |
| HCN3    | 0.1904761905  | 0.1904761905  | 0.1111111111  |  | 1.529411765  | #DIV/0! |
| HCN4    | 0.04761904762 | 0.04761904762 | 0.05555555556 |  | 0.7          | #DIV/0! |

|          |               |               |               |  |              |         |
|----------|---------------|---------------|---------------|--|--------------|---------|
| HCP5     | 0.04761904762 | 0.04761904762 | 0             |  | inf          | #DIV/0! |
| HCRT     | 0.04761904762 | 0.04761904762 | 0             |  | inf          | #DIV/0! |
| ICRTR2   | 0.04761904762 | 0.04761904762 | 0             |  | inf          | #DIV/0! |
| HCST     | 0.04761904762 | 0.04761904762 | 0.05555555556 |  | 0.7          | #DIV/0! |
| HDAC1    | 0.04761904762 | 0.04761904762 | 0.1111111111  |  | 0.325        | #DIV/0! |
| HDAC10   | 0             | 0             | 0.1111111111  |  | 0            | #DIV/0! |
| HDAC11   | 0.04761904762 | 0.04761904762 | 0             |  | inf          | #DIV/0! |
| HDAC11-A | 0.04761904762 | 0.04761904762 | 0             |  | inf          | #DIV/0! |
| HDAC3    | 0.04761904762 | 0.04761904762 | 0             |  | inf          | #DIV/0! |
| HDAC4    | 0             | 0             | 0.05555555556 |  | 0            | #DIV/0! |
| HDAC4-A  | 0             | 0             | 0.05555555556 |  | 0            | #DIV/0! |
| HDAC5    | 0.09523809524 | 0.09523809524 | 0             |  | inf          | #DIV/0! |
| HDAC7    | 0.04761904762 | 0.04761904762 | 0.05555555556 |  | 0.7          | #DIV/0! |
| HDAC9    | 0.04761904762 | 0.04761904762 | 0.2222222222  |  | 0.1375       | #DIV/0! |
| HDC      | 0.1428571429  | 0.1428571429  | 0.05555555556 |  | 2.333333333  | #DIV/0! |
| HDDC3    | 0.04761904762 | 0.04761904762 | 0.05555555556 |  | 0.7          | #DIV/0! |
| HDGF     | 0.1428571429  | 0.1428571429  | 0.05555555556 |  | 2.333333333  | #DIV/0! |
| HDGFL2   | 0.09523809524 | 0.09523809524 | 0.05555555556 |  | 1.473684211  | #DIV/0! |
| HDGFL3   | 0.04761904762 | 0.04761904762 | 0.05555555556 |  | 0.7          | #DIV/0! |
| HDHD2    | 0.04761904762 | 0.04761904762 | 0.05555555556 |  | 0.7          | #DIV/0! |
| HDHD3    | 0.04761904762 | 0.04761904762 | 0.05555555556 |  | 0.7          | #DIV/0! |
| HDHD5    | 0.04761904762 | 0.04761904762 | 0             |  | inf          | #DIV/0! |
| HDHD5-A  | 0.04761904762 | 0.04761904762 | 0             |  | inf          | #DIV/0! |
| HDLBP    | 0             | 0             | 0.05555555556 |  | 0            | #DIV/0! |
| HEAT2    | 0.1428571429  | 0.1428571429  | 0.05555555556 |  | 2.333333333  | #DIV/0! |
| HEATR1   | 0.1428571429  | 0.1428571429  | 0             |  | inf          | #DIV/0! |
| HEATR3   | 0.04761904762 | 0.04761904762 | 0             |  | inf          | #DIV/0! |
| HEATR4   | 0.09523809524 | 0.09523809524 | 0             |  | inf          | #DIV/0! |
| HEATR5   | 0             | 0             | 0             |  |              | #DIV/0! |
| HEATR5   | 0             | 0             | 0.05555555556 |  | 0            | #DIV/0! |
| HEATR6   | 0.1428571429  | 0.1428571429  | 0             |  | inf          | #DIV/0! |
| HEATR9   | 0.09523809524 | 0.09523809524 | 0             |  | inf          | #DIV/0! |
| HEBP1    | 0.04761904762 | 0.04761904762 | 0.05555555556 |  | 0.7          | #DIV/0! |
| HECTD1   | 0             | 0             | 0             |  |              | #DIV/0! |
| HECTD2   | 0.1428571429  | 0.1428571429  | 0.1111111111  |  | 1.083333333  | #DIV/0! |
| HECTD2-A | 0.1428571429  | 0.1428571429  | 0.1111111111  |  | 1.083333333  | #DIV/0! |
| HECTD3   | 0.04761904762 | 0.04761904762 | 0.05555555556 |  | 0.7          | #DIV/0! |
| HECTD4   | 0             | 0             | 0.1111111111  |  | 0            | #DIV/0! |
| HECW1    | 0.04761904762 | 0.04761904762 | 0.1666666667  |  | 0.2          | #DIV/0! |
| HECW1-F  | 0.04761904762 | 0.04761904762 | 0.1666666667  |  | 0.2          | #DIV/0! |
| HECW2    | 0             | 0             | 0.05555555556 |  | 0            | #DIV/0! |
| HECW2-A  | 0             | 0             | 0.05555555556 |  | 0            | #DIV/0! |
| HEG1     | 0.04761904762 | 0.04761904762 | 0.05555555556 |  | 0.7          | #DIV/0! |
| HEIH     | 0.09523809524 | 0.09523809524 | 0.05555555556 |  | 1.473684211  | #DIV/0! |
| HELB     | 0.09523809524 | 0.09523809524 | 0.05555555556 |  | 1.473684211  | #DIV/0! |
| HELLS    | 0.1428571429  | 0.1428571429  | 0             |  | inf          | #DIV/0! |
| HELQ     | 0             | 0             | 0.05555555556 |  | 0            | #DIV/0! |
| HELT     | 0             | 0             | 0.05555555556 |  | 0            | #DIV/0! |
| HELZ     | 0             | 0             | 0             |  |              | #DIV/0! |
| HELZ2    | 0.1428571429  | 0.1428571429  | 0.2222222222  |  | 0.4583333333 | #DIV/0! |
| HEMGN    | 0.04761904762 | 0.04761904762 | 0             |  | inf          | #DIV/0! |



|        |               |               |               |  |              |         |
|--------|---------------|---------------|---------------|--|--------------|---------|
| HEMK1  | 0.09523809524 | 0.09523809524 | 0             |  | inf          | #DIV/0! |
| IENMT  | 0.04761904762 | 0.04761904762 | 0.05555555556 |  | 0.7          | #DIV/0! |
| EPACAN | 0.04761904762 | 0.04761904762 | 0.11111111111 |  | 0.325        | #DIV/0! |
| HERC1  | 0.04761904762 | 0.04761904762 | 0.05555555556 |  | 0.7          | #DIV/0! |
| IERC2P | 0.09523809524 | 0.09523809524 | 0             |  | inf          | #DIV/0! |
| IERC2P | 0.2857142857  | 0.2857142857  | 0.11111111111 |  | 2.6          | #DIV/0! |
| IERC2P | 0.1428571429  | 0.1428571429  | 0             |  | inf          | #DIV/0! |
| IERC2P | 0.04761904762 | 0.04761904762 | 0             |  | inf          | #DIV/0! |
| HERC3  | 0             | 0             | 0.05555555556 |  | 0            | #DIV/0! |
| HERC4  | 0.1904761905  | 0.1904761905  | 0.05555555556 |  | 3.294117647  | #DIV/0! |
| HERC5  | 0             | 0             | 0.05555555556 |  | 0            | #DIV/0! |
| HERC6  | 0             | 0             | 0.05555555556 |  | 0            | #DIV/0! |
| ERPUD  | 0.04761904762 | 0.04761904762 | 0             |  | inf          | #DIV/0! |
| ERPUD  | 0.04761904762 | 0.04761904762 | 0.22222222222 |  | 0.1375       | #DIV/0! |
| HES1   | 0.09523809524 | 0.09523809524 | 0.05555555556 |  | 1.473684211  | #DIV/0! |
| HES2   | 0             | 0             | 0.05555555556 |  | 0            | #DIV/0! |
| HES3   | 0             | 0             | 0.05555555556 |  | 0            | #DIV/0! |
| HES4   | 0             | 0             | 0.11111111111 |  | 0            | #DIV/0! |
| HES5   | 0             | 0             | 0.11111111111 |  | 0            | #DIV/0! |
| HES6   | 0             | 0             | 0.05555555556 |  | 0            | #DIV/0! |
| HES7   | 0             | 0             | 0.05555555556 |  | 0            | #DIV/0! |
| HESX1  | 0.04761904762 | 0.04761904762 | 0             |  | inf          | #DIV/0! |
| HEXA   | 0.04761904762 | 0.04761904762 | 0.05555555556 |  | 0.7          | #DIV/0! |
| EXA-AS | 0.04761904762 | 0.04761904762 | 0.05555555556 |  | 0.7          | #DIV/0! |
| HEXB   | 0.04761904762 | 0.04761904762 | 0.05555555556 |  | 0.7          | #DIV/0! |
| HEXD   | 0.04761904762 | 0.04761904762 | 0             |  | inf          | #DIV/0! |
| HEXIM1 | 0.1428571429  | 0.1428571429  | 0             |  | inf          | #DIV/0! |
| HEXIM2 | 0.1428571429  | 0.1428571429  | 0             |  | inf          | #DIV/0! |
| HEY1   | 0.1428571429  | 0.1428571429  | 0.11111111111 |  | 1.083333333  | #DIV/0! |
| HEYL   | 0.04761904762 | 0.04761904762 | 0.05555555556 |  | 0.7          | #DIV/0! |
| HFE    | 0             | 0             | 0.05555555556 |  | 0            | #DIV/0! |
| HFM1   | 0.04761904762 | 0.04761904762 | 0.05555555556 |  | 0.7          | #DIV/0! |
| HGD    | 0.09523809524 | 0.09523809524 | 0.05555555556 |  | 1.473684211  | #DIV/0! |
| HGF    | 0.04761904762 | 0.04761904762 | 0.16666666667 |  | 0.2          | #DIV/0! |
| HGFAC  | 0.04761904762 | 0.04761904762 | 0             |  | inf          | #DIV/0! |
| HGH1   | 0.04761904762 | 0.04761904762 | 0.16666666667 |  | 0.2          | #DIV/0! |
| HGS    | 0.04761904762 | 0.04761904762 | 0             |  | inf          | #DIV/0! |
| HGSNAT | 0.09523809524 | 0.09523809524 | 0.16666666667 |  | 0.4210526316 | #DIV/0! |
| HHAT   | 0.1428571429  | 0.1428571429  | 0             |  | inf          | #DIV/0! |
| HHATL  | 0.04761904762 | 0.04761904762 | 0             |  | inf          | #DIV/0! |
| HATL-A | 0.04761904762 | 0.04761904762 | 0             |  | inf          | #DIV/0! |
| HHEX   | 0.1428571429  | 0.1428571429  | 0.11111111111 |  | 1.083333333  | #DIV/0! |
| HHIP   | 0             | 0             | 0.05555555556 |  | 0            | #DIV/0! |
| HIP-AS | 0             | 0             | 0.05555555556 |  | 0            | #DIV/0! |
| HHIPL2 | 0.1428571429  | 0.1428571429  | 0.05555555556 |  | 2.333333333  | #DIV/0! |
| HHLA1  | 0.04761904762 | 0.04761904762 | 0.11111111111 |  | 0.325        | #DIV/0! |
| HHLA2  | 0.09523809524 | 0.09523809524 | 0.05555555556 |  | 1.473684211  | #DIV/0! |
| HHLA3  | 0.04761904762 | 0.04761904762 | 0.05555555556 |  | 0.7          | #DIV/0! |
| HIBADH | 0.04761904762 | 0.04761904762 | 0.22222222222 |  | 0.1375       | #DIV/0! |
| HIBCH  | 0             | 0             | 0.05555555556 |  | 0            | #DIV/0! |
| HIC1   | 0             | 0             | 0.11111111111 |  | 0            | #DIV/0! |

|         |               |               |               |  |              |         |
|---------|---------------|---------------|---------------|--|--------------|---------|
| HIC2    | 0.04761904762 | 0.04761904762 | 0.05555555556 |  | 0.7          | #DIV/0! |
| HID1    | 0.04761904762 | 0.04761904762 | 0             |  | inf          | #DIV/0! |
| HID1-AS | 0.04761904762 | 0.04761904762 | 0             |  | inf          | #DIV/0! |
| HIF1A   | 0.1428571429  | 0.1428571429  | 0             |  | inf          | #DIV/0! |
| HIF3A   | 0.09523809524 | 0.09523809524 | 0.1111111111  |  | 0.6842105263 | #DIV/0! |
| HIGD1A  | 0.04761904762 | 0.04761904762 | 0             |  | inf          | #DIV/0! |
| HIGD1B  | 0.1428571429  | 0.1428571429  | 0             |  | inf          | #DIV/0! |
| HIGD1C  | 0.09523809524 | 0.09523809524 | 0.05555555556 |  | 1.473684211  | #DIV/0! |
| HIGD2A  | 0.09523809524 | 0.09523809524 | 0.05555555556 |  | 1.473684211  | #DIV/0! |
| HIGD2B  | 0.04761904762 | 0.04761904762 | 0.05555555556 |  | 0.7          | #DIV/0! |
| HILPDA  | 0.04761904762 | 0.04761904762 | 0.05555555556 |  | 0.7          | #DIV/0! |
| HILS1   | 0.09523809524 | 0.09523809524 | 0             |  | inf          | #DIV/0! |
| HINT1   | 0.04761904762 | 0.04761904762 | 0             |  | inf          | #DIV/0! |
| HINT2   | 0.09523809524 | 0.09523809524 | 0.05555555556 |  | 1.473684211  | #DIV/0! |
| HIP1    | 0.1428571429  | 0.1428571429  | 0.1666666667  |  | 0.6666666667 | #DIV/0! |
| HIP1R   | 0.04761904762 | 0.04761904762 | 0.1111111111  |  | 0.325        | #DIV/0! |
| HIPK1   | 0.04761904762 | 0.04761904762 | 0.05555555556 |  | 0.7          | #DIV/0! |
| IPK1-AS | 0.04761904762 | 0.04761904762 | 0.05555555556 |  | 0.7          | #DIV/0! |
| HIPK2   | 0.04761904762 | 0.04761904762 | 0.05555555556 |  | 0.7          | #DIV/0! |
| HIPK3   | 0.04761904762 | 0.04761904762 | 0             |  | inf          | #DIV/0! |
| HIPK4   | 0.04761904762 | 0.04761904762 | 0.05555555556 |  | 0.7          | #DIV/0! |
| HIRA    | 0.04761904762 | 0.04761904762 | 0.05555555556 |  | 0.7          | #DIV/0! |
| HIRIP3  | 0.04761904762 | 0.04761904762 | 0             |  | inf          | #DIV/0! |
| IST1H1  | 0             | 0             | 0.05555555556 |  | 0            | #DIV/0! |
| IST1H1  | 0             | 0             | 0.05555555556 |  | 0            | #DIV/0! |
| IST1H1  | 0             | 0             | 0.05555555556 |  | 0            | #DIV/0! |
| IST1H1  | 0             | 0             | 0.05555555556 |  | 0            | #DIV/0! |
| IST1H1  | 0             | 0             | 0.05555555556 |  | 0            | #DIV/0! |
| ST1H2A  | 0             | 0             | 0.05555555556 |  | 0            | #DIV/0! |
| ST1H2A  | 0             | 0             | 0.05555555556 |  | 0            | #DIV/0! |
| ST1H2A  | 0             | 0             | 0.05555555556 |  | 0            | #DIV/0! |
| ST1H2A  | 0             | 0             | 0.05555555556 |  | 0            | #DIV/0! |
| IST1H2E | 0             | 0             | 0.05555555556 |  | 0            | #DIV/0! |
| ST1H2E  | 0             | 0             | 0.05555555556 |  | 0            | #DIV/0! |
| ST1H2E  | 0             | 0             | 0.05555555556 |  | 0            | #DIV/0! |
| IST1H2E | 0             | 0             | 0.05555555556 |  | 0            | #DIV/0! |
| IST1H2E | 0             | 0             | 0.05555555556 |  | 0            | #DIV/0! |
| ST1H2E  | 0             | 0             | 0.05555555556 |  | 0            | #DIV/0! |
| ST1H2E  | 0             | 0             | 0.05555555556 |  | 0            | #DIV/0! |
| IST1H2I | 0             | 0             | 0.05555555556 |  | 0            | #DIV/0! |
| IST1H3  | 0             | 0             | 0.05555555556 |  | 0            | #DIV/0! |
| IST1H3  | 0             | 0             | 0.05555555556 |  | 0            | #DIV/0! |
| IST1H3  | 0             | 0             | 0.05555555556 |  | 0            | #DIV/0! |
| IST1H3  | 0             | 0             | 0.05555555556 |  | 0            | #DIV/0! |
| IST1H3  | 0             | 0             | 0.05555555556 |  | 0            | #DIV/0! |
| IST1H3  | 0             | 0             | 0.05555555556 |  | 0            | #DIV/0! |
| IST1H3  | 0             | 0             | 0.05555555556 |  | 0            | #DIV/0! |
| IST1H3  | 0             | 0             | 0.05555555556 |  | 0            | #DIV/0! |
| IST1H4  | 0             | 0             | 0.05555555556 |  | 0            | #DIV/0! |
| IST1H4  | 0             | 0             | 0.05555555556 |  | 0            | #DIV/0! |
| IST1H4  | 0             | 0             | 0.05555555556 |  | 0            | #DIV/0! |
| IST1H4  | 0             | 0             | 0.05555555556 |  | 0            | #DIV/0! |

|         |               |               |               |  |             |         |
|---------|---------------|---------------|---------------|--|-------------|---------|
| IST1H4  | 0             | 0             | 0.05555555556 |  | 0           | #DIV/0! |
| IST1H4  | 0             | 0             | 0.05555555556 |  | 0           | #DIV/0! |
| IST1H4  | 0             | 0             | 0.05555555556 |  | 0           | #DIV/0! |
| IST1H4  | 0             | 0             | 0.05555555556 |  | 0           | #DIV/0! |
| ST2H2A  | 0.1428571429  | 0.1428571429  | 0.05555555556 |  | 2.333333333 | #DIV/0! |
| ST2H2A  | 0.1428571429  | 0.1428571429  | 0.05555555556 |  | 2.333333333 | #DIV/0! |
| ST2H2A  | 0.1428571429  | 0.1428571429  | 0.05555555556 |  | 2.333333333 | #DIV/0! |
| ST2H2A  | 0.1428571429  | 0.1428571429  | 0.05555555556 |  | 2.333333333 | #DIV/0! |
| ST2H2B  | 0.04761904762 | 0.04761904762 | 0.1111111111  |  | 0.325       | #DIV/0! |
| IST2H2B | 0.09523809524 | 0.09523809524 | 0.05555555556 |  | 1.473684211 | #DIV/0! |
| ST2H2B  | 0.1428571429  | 0.1428571429  | 0.05555555556 |  | 2.333333333 | #DIV/0! |
| IST2H2E | 0.1428571429  | 0.1428571429  | 0.05555555556 |  | 2.333333333 | #DIV/0! |
| IST2H2E | 0.1428571429  | 0.1428571429  | 0.05555555556 |  | 2.333333333 | #DIV/0! |
| IST2H3  | 0.1428571429  | 0.1428571429  | 0.05555555556 |  | 2.333333333 | #DIV/0! |
| IST2H3  | 0.1428571429  | 0.1428571429  | 0.05555555556 |  | 2.333333333 | #DIV/0! |
| IST2H3  | 0.1428571429  | 0.1428571429  | 0.05555555556 |  | 2.333333333 | #DIV/0! |
| ST2H3D  | 0.1428571429  | 0.1428571429  | 0.1111111111  |  | 1.083333333 | #DIV/0! |
| ST2H3P  | 0.09523809524 | 0.09523809524 | 0.05555555556 |  | 1.473684211 | #DIV/0! |
| IST2H4  | 0.1428571429  | 0.1428571429  | 0.05555555556 |  | 2.333333333 | #DIV/0! |
| IST2H4  | 0.1428571429  | 0.1428571429  | 0.05555555556 |  | 2.333333333 | #DIV/0! |
| IST3H2  | 0.1428571429  | 0.1428571429  | 0             |  | inf         | #DIV/0! |
| IST3H2E | 0.1428571429  | 0.1428571429  | 0             |  | inf         | #DIV/0! |
| HIST3H3 | 0.1428571429  | 0.1428571429  | 0             |  | inf         | #DIV/0! |
| HIST4H4 | 0.04761904762 | 0.04761904762 | 0.1111111111  |  | 0.325       | #DIV/0! |
| HIVEP1  | 0.04761904762 | 0.04761904762 | 0             |  | inf         | #DIV/0! |
| HIVEP3  | 0.04761904762 | 0.04761904762 | 0.05555555556 |  | 0.7         | #DIV/0! |
| HJURP   | 0             | 0             | 0.05555555556 |  | 0           | #DIV/0! |
| HJV     | 0.1428571429  | 0.1428571429  | 0.05555555556 |  | 2.333333333 | #DIV/0! |
| HK1     | 0.1904761905  | 0.1904761905  | 0             |  | inf         | #DIV/0! |
| HK2     | 0             | 0             | 0.05555555556 |  | 0           | #DIV/0! |
| HK3     | 0.09523809524 | 0.09523809524 | 0.05555555556 |  | 1.473684211 | #DIV/0! |
| HKDC1   | 0.1904761905  | 0.1904761905  | 0             |  | inf         | #DIV/0! |
| LA-DM   | 0.04761904762 | 0.04761904762 | 0             |  | inf         | #DIV/0! |
| LA-DM   | 0.04761904762 | 0.04761904762 | 0             |  | inf         | #DIV/0! |
| LA-DO   | 0.04761904762 | 0.04761904762 | 0             |  | inf         | #DIV/0! |
| ILA-DO  | 0.04761904762 | 0.04761904762 | 0             |  | inf         | #DIV/0! |
| LA-DPA  | 0.04761904762 | 0.04761904762 | 0             |  | inf         | #DIV/0! |
| LA-DPB  | 0.04761904762 | 0.04761904762 | 0             |  | inf         | #DIV/0! |
| LA-DPB  | 0.04761904762 | 0.04761904762 | 0             |  | inf         | #DIV/0! |
| LA-DQA  | 0.04761904762 | 0.04761904762 | 0             |  | inf         | #DIV/0! |
| LA-DQA  | 0.04761904762 | 0.04761904762 | 0             |  | inf         | #DIV/0! |
| LA-DQB  | 0.04761904762 | 0.04761904762 | 0             |  | inf         | #DIV/0! |
| LA-DQB1 | 0.04761904762 | 0.04761904762 | 0             |  | inf         | #DIV/0! |
| LA-DQB  | 0.04761904762 | 0.04761904762 | 0             |  | inf         | #DIV/0! |
| ILA-DR  | 0.04761904762 | 0.04761904762 | 0             |  | inf         | #DIV/0! |
| LA-DRE  | 0.04761904762 | 0.04761904762 | 0             |  | inf         | #DIV/0! |
| LA-DRE  | 0.04761904762 | 0.04761904762 | 0             |  | inf         | #DIV/0! |
| LA-DRE  | 0.04761904762 | 0.04761904762 | 0             |  | inf         | #DIV/0! |
| HLCS    | 0.04761904762 | 0.04761904762 | 0.1666666667  |  | 0.2         | #DIV/0! |
| HLF     | 0.09523809524 | 0.09523809524 | 0             |  | inf         | #DIV/0! |
| HLTF    | 0.1428571429  | 0.1428571429  | 0.1111111111  |  | 1.083333333 | #DIV/0! |

|         |               |               |              |  |              |         |
|---------|---------------|---------------|--------------|--|--------------|---------|
| LTF-AS  | 0.1428571429  | 0.1428571429  | 0.1111111111 |  | 1.083333333  | #DIV/0! |
| HLX     | 0.1428571429  | 0.1428571429  | 0.0555555556 |  | 2.333333333  | #DIV/0! |
| ILX-AS  | 0.1428571429  | 0.1428571429  | 0.0555555556 |  | 2.333333333  | #DIV/0! |
| HM13    | 0.09523809524 | 0.09523809524 | 0.1111111111 |  | 0.6842105263 | #DIV/0! |
| M13-AS  | 0.09523809524 | 0.09523809524 | 0.1111111111 |  | 0.6842105263 | #DIV/0! |
| IMBOX   | 0.04761904762 | 0.04761904762 | 0.1111111111 |  | 0.325        | #DIV/0! |
| HMCES   | 0.09523809524 | 0.09523809524 | 0.0555555556 |  | 1.473684211  | #DIV/0! |
| HMCN1   | 0.1428571429  | 0.1428571429  | 0.0555555556 |  | 2.333333333  | #DIV/0! |
| HMCN2   | 0.09523809524 | 0.09523809524 | 0.0555555556 |  | 1.473684211  | #DIV/0! |
| IMG20A  | 0.04761904762 | 0.04761904762 | 0.0555555556 |  | 0.7          | #DIV/0! |
| IMG20B  | 0.09523809524 | 0.09523809524 | 0.0555555556 |  | 1.473684211  | #DIV/0! |
| HMGA1   | 0.04761904762 | 0.04761904762 | 0            |  | inf          | #DIV/0! |
| HMGA2   | 0.09523809524 | 0.09523809524 | 0.0555555556 |  | 1.473684211  | #DIV/0! |
| IGA2-A  | 0.09523809524 | 0.09523809524 | 0.0555555556 |  | 1.473684211  | #DIV/0! |
| HMGB2   | 0             | 0             | 0.0555555556 |  | 0            | #DIV/0! |
| MGB3P   | 0.09523809524 | 0.09523809524 | 0.1111111111 |  | 0.6842105263 | #DIV/0! |
| HMGB4   | 0.04761904762 | 0.04761904762 | 0            |  | inf          | #DIV/0! |
| HMGCL   | 0.04761904762 | 0.04761904762 | 0.1111111111 |  | 0.325        | #DIV/0! |
| MGCL1   | 0.04761904762 | 0.04761904762 | 0.0555555556 |  | 0.7          | #DIV/0! |
| HMGCR   | 0.04761904762 | 0.04761904762 | 0            |  | inf          | #DIV/0! |
| IMGCS   | 0.04761904762 | 0.04761904762 | 0.0555555556 |  | 0.7          | #DIV/0! |
| IMGCS   | 0.04761904762 | 0.04761904762 | 0.0555555556 |  | 0.7          | #DIV/0! |
| HMGN1   | 0.04761904762 | 0.04761904762 | 0.1111111111 |  | 0.325        | #DIV/0! |
| HMGN2   | 0.04761904762 | 0.04761904762 | 0.1111111111 |  | 0.325        | #DIV/0! |
| MGN2P   | 0.04761904762 | 0.04761904762 | 0            |  | inf          | #DIV/0! |
| HMGN4   | 0             | 0             | 0.0555555556 |  | 0            | #DIV/0! |
| IMGXB   | 0             | 0             | 0.1666666667 |  | 0            | #DIV/0! |
| HMMR    | 0             | 0             | 0.0555555556 |  | 0            | #DIV/0! |
| MMR-A   | 0             | 0             | 0.0555555556 |  | 0            | #DIV/0! |
| HMOX1   | 0             | 0             | 0.1111111111 |  | 0            | #DIV/0! |
| HMOX2   | 0.04761904762 | 0.04761904762 | 0            |  | inf          | #DIV/0! |
| HMSD    | 0.04761904762 | 0.04761904762 | 0            |  | inf          | #DIV/0! |
| HMX2    | 0.2380952381  | 0.2380952381  | 0.0555555556 |  | 4.375        | #DIV/0! |
| HMX3    | 0.2380952381  | 0.2380952381  | 0.0555555556 |  | 4.375        | #DIV/0! |
| HNF1A   | 0.04761904762 | 0.04761904762 | 0.1111111111 |  | 0.325        | #DIV/0! |
| NF1A-AS | 0.04761904762 | 0.04761904762 | 0.1111111111 |  | 0.325        | #DIV/0! |
| HNF4A   | 0.1428571429  | 0.1428571429  | 0.1666666667 |  | 0.6666666667 | #DIV/0! |
| NF4A-AS | 0.1428571429  | 0.1428571429  | 0.1666666667 |  | 0.6666666667 | #DIV/0! |
| HNF4G   | 0.1904761905  | 0.1904761905  | 0.1111111111 |  | 1.529411765  | #DIV/0! |
| HNMT    | 0             | 0             | 0.0555555556 |  | 0            | #DIV/0! |
| NRNPA   | 0.04761904762 | 0.04761904762 | 0            |  | inf          | #DIV/0! |
| NRNPA   | 0.04761904762 | 0.04761904762 | 0.0555555556 |  | 0.7          | #DIV/0! |
| RNPA1   | 0.1428571429  | 0.1428571429  | 0.1111111111 |  | 1.083333333  | #DIV/0! |
| RNPA1   | 0.1428571429  | 0.1428571429  | 0.0555555556 |  | 2.333333333  | #DIV/0! |
| NRNPA2  | 0.04761904762 | 0.04761904762 | 0.2222222222 |  | 0.1375       | #DIV/0! |
| NRNPA   | 0             | 0             | 0.1111111111 |  | 0            | #DIV/0! |
| NRNPA3  | 0.1428571429  | 0.1428571429  | 0.0555555556 |  | 2.333333333  | #DIV/0! |
| NRNPA   | 0.09523809524 | 0.09523809524 | 0.0555555556 |  | 1.473684211  | #DIV/0! |
| NRNPC1  | 0.04761904762 | 0.04761904762 | 0.1111111111 |  | 0.325        | #DIV/0! |
| NRNPC1  | 0.04761904762 | 0.04761904762 | 0.1111111111 |  | 0.325        | #DIV/0! |
| NRNPC1  | 0.04761904762 | 0.04761904762 | 0.1111111111 |  | 0.325        | #DIV/0! |

|         |               |               |               |  |              |         |
|---------|---------------|---------------|---------------|--|--------------|---------|
| NRNPC1  | 0.04761904762 | 0.04761904762 | 0.1111111111  |  | 0.325        | #DIV/0! |
| INRNPI  | 0             | 0             | 0.05555555556 |  | 0            | #DIV/0! |
| NRNPD   | 0             | 0             | 0.05555555556 |  | 0            | #DIV/0! |
| INRNPI  | 0.1428571429  | 0.1428571429  | 0.05555555556 |  | 2.333333333  | #DIV/0! |
| NRNPH   | 0.09523809524 | 0.09523809524 | 0.05555555556 |  | 1.473684211  | #DIV/0! |
| NRNPH   | 0.1904761905  | 0.1904761905  | 0.05555555556 |  | 3.294117647  | #DIV/0! |
| INRNPK  | 0             | 0             | 0.05555555556 |  | 0            | #DIV/0! |
| INRNPI  | 0.04761904762 | 0.04761904762 | 0.05555555556 |  | 0.7          | #DIV/0! |
| NRNPL   | 0             | 0             | 0.05555555556 |  | 0            | #DIV/0! |
| INRNPM  | 0.1428571429  | 0.1428571429  | 0.05555555556 |  | 2.333333333  | #DIV/0! |
| INRNPK  | 0.04761904762 | 0.04761904762 | 0.1111111111  |  | 0.325        | #DIV/0! |
| INRNPI  | 0.1428571429  | 0.1428571429  | 0.05555555556 |  | 2.333333333  | #DIV/0! |
| NRNPU   | 0.04761904762 | 0.04761904762 | 0.05555555556 |  | 0.7          | #DIV/0! |
| HOGA1   | 0.1428571429  | 0.1428571429  | 0             |  | inf          | #DIV/0! |
| IOMER   | 0.04761904762 | 0.04761904762 | 0             |  | inf          | #DIV/0! |
| IOMER   | 0.04761904762 | 0.04761904762 | 0.05555555556 |  | 0.7          | #DIV/0! |
| IOMER   | 0.1428571429  | 0.1428571429  | 0.1111111111  |  | 1.083333333  | #DIV/0! |
| MER3-A  | 0.1428571429  | 0.1428571429  | 0.1111111111  |  | 1.083333333  | #DIV/0! |
| HOMEZ   | 0             | 0             | 0.1111111111  |  | 0            | #DIV/0! |
| HOOK1   | 0.04761904762 | 0.04761904762 | 0.05555555556 |  | 0.7          | #DIV/0! |
| HOOK2   | 0.1428571429  | 0.1428571429  | 0.1111111111  |  | 1.083333333  | #DIV/0! |
| HOOK3   | 0.09523809524 | 0.09523809524 | 0.1666666667  |  | 0.4210526316 | #DIV/0! |
| HOPX    | 0.1904761905  | 0.1904761905  | 0.05555555556 |  | 3.294117647  | #DIV/0! |
| ORMAI   | 0.1904761905  | 0.1904761905  | 0.05555555556 |  | 3.294117647  | #DIV/0! |
| ORMAI   | 0.04761904762 | 0.04761904762 | 0.1111111111  |  | 0.325        | #DIV/0! |
| RMAD2   | 0.04761904762 | 0.04761904762 | 0.1111111111  |  | 0.325        | #DIV/0! |
| HOTAIR  | 0.04761904762 | 0.04761904762 | 0.05555555556 |  | 0.7          | #DIV/0! |
| OTAIRM  | 0.04761904762 | 0.04761904762 | 0.2222222222  |  | 0.1375       | #DIV/0! |
| HOTS    | 0.04761904762 | 0.04761904762 | 0             |  | inf          | #DIV/0! |
| HOTTIP  | 0.04761904762 | 0.04761904762 | 0.2222222222  |  | 0.1375       | #DIV/0! |
| OXA-AS  | 0.04761904762 | 0.04761904762 | 0.2222222222  |  | 0.1375       | #DIV/0! |
| OXA-AS  | 0.04761904762 | 0.04761904762 | 0.2222222222  |  | 0.1375       | #DIV/0! |
| HOXA1   | 0.04761904762 | 0.04761904762 | 0.2222222222  |  | 0.1375       | #DIV/0! |
| HOXA10  | 0.04761904762 | 0.04761904762 | 0.2222222222  |  | 0.1375       | #DIV/0! |
| OXA10-A | 0.04761904762 | 0.04761904762 | 0.2222222222  |  | 0.1375       | #DIV/0! |
| A10-HO  | 0.04761904762 | 0.04761904762 | 0.2222222222  |  | 0.1375       | #DIV/0! |
| HOXA11  | 0.04761904762 | 0.04761904762 | 0.2222222222  |  | 0.1375       | #DIV/0! |
| OXA11-A | 0.04761904762 | 0.04761904762 | 0.2222222222  |  | 0.1375       | #DIV/0! |
| HOXA13  | 0.04761904762 | 0.04761904762 | 0.2222222222  |  | 0.1375       | #DIV/0! |
| HOXA2   | 0.04761904762 | 0.04761904762 | 0.2222222222  |  | 0.1375       | #DIV/0! |
| HOXA3   | 0.04761904762 | 0.04761904762 | 0.2222222222  |  | 0.1375       | #DIV/0! |
| HOXA4   | 0.04761904762 | 0.04761904762 | 0.2222222222  |  | 0.1375       | #DIV/0! |
| HOXA5   | 0.04761904762 | 0.04761904762 | 0.2222222222  |  | 0.1375       | #DIV/0! |
| HOXA6   | 0.04761904762 | 0.04761904762 | 0.2222222222  |  | 0.1375       | #DIV/0! |
| HOXA7   | 0.04761904762 | 0.04761904762 | 0.2222222222  |  | 0.1375       | #DIV/0! |
| HOXA9   | 0.04761904762 | 0.04761904762 | 0.2222222222  |  | 0.1375       | #DIV/0! |
| OXB-AS  | 0.1428571429  | 0.1428571429  | 0             |  | inf          | #DIV/0! |
| OXB-AS  | 0.1428571429  | 0.1428571429  | 0             |  | inf          | #DIV/0! |
| HOXB1   | 0.1428571429  | 0.1428571429  | 0             |  | inf          | #DIV/0! |
| HOXB13  | 0.1428571429  | 0.1428571429  | 0             |  | inf          | #DIV/0! |
| HOXB2   | 0.1428571429  | 0.1428571429  | 0             |  | inf          | #DIV/0! |

|         |               |               |               |  |              |         |
|---------|---------------|---------------|---------------|--|--------------|---------|
| HOXB3   | 0.1428571429  | 0.1428571429  | 0             |  | inf          | #DIV/0! |
| HOXB4   | 0.1428571429  | 0.1428571429  | 0             |  | inf          | #DIV/0! |
| HOXB5   | 0.1428571429  | 0.1428571429  | 0             |  | inf          | #DIV/0! |
| HOXB6   | 0.1428571429  | 0.1428571429  | 0             |  | inf          | #DIV/0! |
| HOXB7   | 0.1428571429  | 0.1428571429  | 0             |  | inf          | #DIV/0! |
| HOXB8   | 0.1428571429  | 0.1428571429  | 0             |  | inf          | #DIV/0! |
| HOXB9   | 0.1428571429  | 0.1428571429  | 0             |  | inf          | #DIV/0! |
| OXC-AS0 | 0.04761904762 | 0.04761904762 | 0.05555555556 |  | 0.7          | #DIV/0! |
| OXC-AS0 | 0.04761904762 | 0.04761904762 | 0.05555555556 |  | 0.7          | #DIV/0! |
| OXC-AS0 | 0.04761904762 | 0.04761904762 | 0.05555555556 |  | 0.7          | #DIV/0! |
| HOXC10  | 0.04761904762 | 0.04761904762 | 0.05555555556 |  | 0.7          | #DIV/0! |
| HOXC11  | 0.04761904762 | 0.04761904762 | 0.05555555556 |  | 0.7          | #DIV/0! |
| HOXC12  | 0.04761904762 | 0.04761904762 | 0.05555555556 |  | 0.7          | #DIV/0! |
| HOXC13  | 0.04761904762 | 0.04761904762 | 0.05555555556 |  | 0.7          | #DIV/0! |
| OXC13-A | 0.04761904762 | 0.04761904762 | 0.05555555556 |  | 0.7          | #DIV/0! |
| HOXC4   | 0.04761904762 | 0.04761904762 | 0.05555555556 |  | 0.7          | #DIV/0! |
| HOXC5   | 0.04761904762 | 0.04761904762 | 0.05555555556 |  | 0.7          | #DIV/0! |
| HOXC6   | 0.04761904762 | 0.04761904762 | 0.05555555556 |  | 0.7          | #DIV/0! |
| HOXC8   | 0.04761904762 | 0.04761904762 | 0.05555555556 |  | 0.7          | #DIV/0! |
| HOXC9   | 0.04761904762 | 0.04761904762 | 0.05555555556 |  | 0.7          | #DIV/0! |
| HOXD10  | 0             | 0             | 0.1111111111  |  | 0            | #DIV/0! |
| HOXD11  | 0             | 0             | 0.1111111111  |  | 0            | #DIV/0! |
| HOXD12  | 0             | 0             | 0.1111111111  |  | 0            | #DIV/0! |
| HOXD13  | 0             | 0             | 0.1111111111  |  | 0            | #DIV/0! |
| HOXD8   | 0             | 0             | 0.1111111111  |  | 0            | #DIV/0! |
| HOXD9   | 0             | 0             | 0.1111111111  |  | 0            | #DIV/0! |
| HP      | 0.04761904762 | 0.04761904762 | 0             |  | inf          | #DIV/0! |
| HP09053 | 0.09523809524 | 0.09523809524 | 0.1111111111  |  | 0.6842105263 | #DIV/0! |
| HP1BP3  | 0.04761904762 | 0.04761904762 | 0.1111111111  |  | 0.325        | #DIV/0! |
| HPCA    | 0.04761904762 | 0.04761904762 | 0.1111111111  |  | 0.325        | #DIV/0! |
| IPCAL1  | 0             | 0             | 0.05555555556 |  | 0            | #DIV/0! |
| IPCAL4  | 0.04761904762 | 0.04761904762 | 0.05555555556 |  | 0.7          | #DIV/0! |
| HPD     | 0.04761904762 | 0.04761904762 | 0.1111111111  |  | 0.325        | #DIV/0! |
| HPDL    | 0.04761904762 | 0.04761904762 | 0.05555555556 |  | 0.7          | #DIV/0! |
| HPF1    | 0             | 0             | 0.05555555556 |  | 0            | #DIV/0! |
| HPGD    | 0             | 0             | 0.05555555556 |  | 0            | #DIV/0! |
| HPGDS   | 0             | 0             | 0.05555555556 |  | 0            | #DIV/0! |
| HPN     | 0.04761904762 | 0.04761904762 | 0.05555555556 |  | 0.7          | #DIV/0! |
| HPN-AS  | 0.04761904762 | 0.04761904762 | 0.05555555556 |  | 0.7          | #DIV/0! |
| HPR     | 0.04761904762 | 0.04761904762 | 0             |  | inf          | #DIV/0! |
| HPS1    | 0.1428571429  | 0.1428571429  | 0             |  | inf          | #DIV/0! |
| HPS3    | 0.1428571429  | 0.1428571429  | 0.1111111111  |  | 1.083333333  | #DIV/0! |
| HPS4    | 0.04761904762 | 0.04761904762 | 0.05555555556 |  | 0.7          | #DIV/0! |
| HPS6    | 0.1428571429  | 0.1428571429  | 0.05555555556 |  | 2.333333333  | #DIV/0! |
| HPSE    | 0             | 0             | 0.05555555556 |  | 0            | #DIV/0! |
| HPSE2   | 0.1428571429  | 0.1428571429  | 0             |  | inf          | #DIV/0! |
| HPX     | 0.04761904762 | 0.04761904762 | 0             |  | inf          | #DIV/0! |
| HPYR1   | 0.04761904762 | 0.04761904762 | 0.1111111111  |  | 0.325        | #DIV/0! |
| HR      | 0.09523809524 | 0.09523809524 | 0.1111111111  |  | 0.6842105263 | #DIV/0! |
| HRAS    | 0.04761904762 | 0.04761904762 | 0             |  | inf          | #DIV/0! |
| HRAT17  | 0.04761904762 | 0.04761904762 | 0.05555555556 |  | 0.7          | #DIV/0! |

|          |               |               |               |  |               |         |
|----------|---------------|---------------|---------------|--|---------------|---------|
| HRAT5    | 0             | 0             | 0.05555555556 |  | 0             | #DIV/0! |
| HRAT92   | 0.04761904762 | 0.04761904762 | 0.16666666667 |  | 0.2           | #DIV/0! |
| HRC      | 0.09523809524 | 0.09523809524 | 0.11111111111 |  | 0.6842105263  | #DIV/0! |
| HRCT1    | 0.09523809524 | 0.09523809524 | 0.05555555556 |  | 1.473684211   | #DIV/0! |
| HRG      | 0.09523809524 | 0.09523809524 | 0.05555555556 |  | 1.473684211   | #DIV/0! |
| HRH1     | 0.09523809524 | 0.09523809524 | 0             |  | inf           | #DIV/0! |
| HRH2     | 0             | 0             | 0.05555555556 |  | 0             | #DIV/0! |
| HRH3     | 0.1428571429  | 0.1428571429  | 0.22222222222 |  | 0.45833333333 | #DIV/0! |
| HRH4     | 0.09523809524 | 0.09523809524 | 0.05555555556 |  | 1.473684211   | #DIV/0! |
| HRK      | 0             | 0             | 0.05555555556 |  | 0             | #DIV/0! |
| HRNR     | 0.1904761905  | 0.1904761905  | 0             |  | inf           | #DIV/0! |
| HS1BP3   | 0             | 0             | 0.05555555556 |  | 0             | #DIV/0! |
| S1BP3-I  | 0             | 0             | 0.05555555556 |  | 0             | #DIV/0! |
| HS2ST1   | 0.04761904762 | 0.04761904762 | 0.05555555556 |  | 0.7           | #DIV/0! |
| HS3ST1   | 0             | 0             | 0             |  |               | #DIV/0! |
| HS3ST2   | 0.04761904762 | 0.04761904762 | 0             |  | inf           | #DIV/0! |
| S3ST3A   | 0.04761904762 | 0.04761904762 | 0.11111111111 |  | 0.325         | #DIV/0! |
| S3ST3B   | 0.04761904762 | 0.04761904762 | 0.05555555556 |  | 0.7           | #DIV/0! |
| HS3ST4   | 0.04761904762 | 0.04761904762 | 0             |  | inf           | #DIV/0! |
| HS3ST6   | 0.09523809524 | 0.09523809524 | 0.22222222222 |  | 0.2894736842  | #DIV/0! |
| HS6ST1   | 0             | 0             | 0.05555555556 |  | 0             | #DIV/0! |
| HSBP1    | 0.04761904762 | 0.04761904762 | 0             |  | inf           | #DIV/0! |
| ISBP1L   | 0.04761904762 | 0.04761904762 | 0.05555555556 |  | 0.7           | #DIV/0! |
| HSCB     | 0.04761904762 | 0.04761904762 | 0.11111111111 |  | 0.325         | #DIV/0! |
| ISD11B   | 0.1428571429  | 0.1428571429  | 0             |  | inf           | #DIV/0! |
| D11B1-A  | 0.1428571429  | 0.1428571429  | 0             |  | inf           | #DIV/0! |
| SD11B1   | 0.1428571429  | 0.1428571429  | 0.05555555556 |  | 2.3333333333  | #DIV/0! |
| ISD11B2  | 0.1428571429  | 0.1428571429  | 0.05555555556 |  | 2.3333333333  | #DIV/0! |
| ISD17B1  | 0             | 0             | 0.05555555556 |  | 0             | #DIV/0! |
| SD17B1   | 0             | 0             | 0.05555555556 |  | 0             | #DIV/0! |
| SD17B10  | 0.09523809524 | 0.09523809524 | 0.11111111111 |  | 0.6842105263  | #DIV/0! |
| ISD17B2  | 0.04761904762 | 0.04761904762 | 0             |  | inf           | #DIV/0! |
| ISD17B3  | 0.04761904762 | 0.04761904762 | 0.05555555556 |  | 0.7           | #DIV/0! |
| D17B3-A  | 0.04761904762 | 0.04761904762 | 0.05555555556 |  | 0.7           | #DIV/0! |
| ISD17B4  | 0.04761904762 | 0.04761904762 | 0             |  | inf           | #DIV/0! |
| ISD17B6  | 0.1428571429  | 0.1428571429  | 0.05555555556 |  | 2.3333333333  | #DIV/0! |
| ISD17B7  | 0.1428571429  | 0.1428571429  | 0             |  | inf           | #DIV/0! |
| SD17B710 | 0.09523809524 | 0.09523809524 | 0.11111111111 |  | 0.6842105263  | #DIV/0! |
| ISD17B8  | 0.04761904762 | 0.04761904762 | 0             |  | inf           | #DIV/0! |
| HSD3B1   | 0.04761904762 | 0.04761904762 | 0.05555555556 |  | 0.7           | #DIV/0! |
| HSD3B2   | 0.04761904762 | 0.04761904762 | 0.05555555556 |  | 0.7           | #DIV/0! |
| HSD3B7   | 0.04761904762 | 0.04761904762 | 0             |  | inf           | #DIV/0! |
| ISD3BP4  | 0.04761904762 | 0.04761904762 | 0.05555555556 |  | 0.7           | #DIV/0! |
| HSD52    | 0.04761904762 | 0.04761904762 | 0.05555555556 |  | 0.7           | #DIV/0! |
| HSDL1    | 0.04761904762 | 0.04761904762 | 0             |  | inf           | #DIV/0! |
| HSDL2    | 0.04761904762 | 0.04761904762 | 0.05555555556 |  | 0.7           | #DIV/0! |
| HSF1     | 0.04761904762 | 0.04761904762 | 0.16666666667 |  | 0.2           | #DIV/0! |
| HSF2BP   | 0.04761904762 | 0.04761904762 | 0.16666666667 |  | 0.2           | #DIV/0! |
| HSF4     | 0.1428571429  | 0.1428571429  | 0.05555555556 |  | 2.3333333333  | #DIV/0! |
| HSF5     | 0.09523809524 | 0.09523809524 | 0             |  | inf           | #DIV/0! |
| ISFY1P   | 0.04761904762 | 0.04761904762 | 0             |  | inf           | #DIV/0! |

|         |               |               |               |  |              |         |
|---------|---------------|---------------|---------------|--|--------------|---------|
| HSH2D   | 0.1428571429  | 0.1428571429  | 0.1111111111  |  | 1.083333333  | #DIV/0! |
| SP90AB  | 0.04761904762 | 0.04761904762 | 0.05555555556 |  | 0.7          | #DIV/0! |
| SP90AB4 | 0.04761904762 | 0.04761904762 | 0.05555555556 |  | 0.7          | #DIV/0! |
| HSP90B1 | 0.04761904762 | 0.04761904762 | 0.05555555556 |  | 0.7          | #DIV/0! |
| SP90B2  | 0.04761904762 | 0.04761904762 | 0.05555555556 |  | 0.7          | #DIV/0! |
| HSPA12A | 0.2380952381  | 0.2380952381  | 0             |  | inf          | #DIV/0! |
| HSPA13  | 0.04761904762 | 0.04761904762 | 0.1111111111  |  | 0.325        | #DIV/0! |
| HSPA14  | 0.09523809524 | 0.09523809524 | 0.1111111111  |  | 0.6842105263 | #DIV/0! |
| HSPA1A  | 0.04761904762 | 0.04761904762 | 0             |  | inf          | #DIV/0! |
| HSPA1B  | 0.04761904762 | 0.04761904762 | 0             |  | inf          | #DIV/0! |
| HSPA1L  | 0.04761904762 | 0.04761904762 | 0             |  | inf          | #DIV/0! |
| HSPA2   | 0.09523809524 | 0.09523809524 | 0             |  | inf          | #DIV/0! |
| HSPA4   | 0.04761904762 | 0.04761904762 | 0             |  | inf          | #DIV/0! |
| HSPA4L  | 0             | 0             | 0.05555555556 |  | 0            | #DIV/0! |
| HSPA5   | 0.09523809524 | 0.09523809524 | 0.05555555556 |  | 1.473684211  | #DIV/0! |
| HSPA6   | 0.1428571429  | 0.1428571429  | 0             |  | inf          | #DIV/0! |
| HSPA7   | 0.1428571429  | 0.1428571429  | 0             |  | inf          | #DIV/0! |
| HSPA9   | 0.04761904762 | 0.04761904762 | 0             |  | inf          | #DIV/0! |
| HSPB1   | 0.09523809524 | 0.09523809524 | 0.1111111111  |  | 0.6842105263 | #DIV/0! |
| HSPB11  | 0.04761904762 | 0.04761904762 | 0.05555555556 |  | 0.7          | #DIV/0! |
| HSPB3   | 0.04761904762 | 0.04761904762 | 0.05555555556 |  | 0.7          | #DIV/0! |
| HSPB6   | 0.04761904762 | 0.04761904762 | 0.05555555556 |  | 0.7          | #DIV/0! |
| HSPB7   | 0.04761904762 | 0.04761904762 | 0.1111111111  |  | 0.325        | #DIV/0! |
| HSPB8   | 0             | 0             | 0.05555555556 |  | 0            | #DIV/0! |
| HSPB9   | 0.04761904762 | 0.04761904762 | 0             |  | inf          | #DIV/0! |
| ISPBAP  | 0.09523809524 | 0.09523809524 | 0.05555555556 |  | 1.473684211  | #DIV/0! |
| HSPB10  | 0.09523809524 | 0.09523809524 | 0.05555555556 |  | 1.473684211  | #DIV/0! |
| ISPC32A | 0.1428571429  | 0.1428571429  | 0.05555555556 |  | 2.333333333  | #DIV/0! |
| HSPD1   | 0             | 0             | 0.05555555556 |  | 0            | #DIV/0! |
| HSPE1   | 0             | 0             | 0.05555555556 |  | 0            | #DIV/0! |
| PE1-MC  | 0             | 0             | 0.05555555556 |  | 0            | #DIV/0! |
| HSPG2   | 0.04761904762 | 0.04761904762 | 0.1111111111  |  | 0.325        | #DIV/0! |
| HTD2    | 0.04761904762 | 0.04761904762 | 0             |  | inf          | #DIV/0! |
| HTN1    | 0.04761904762 | 0.04761904762 | 0.05555555556 |  | 0.7          | #DIV/0! |
| HTN3    | 0.04761904762 | 0.04761904762 | 0.05555555556 |  | 0.7          | #DIV/0! |
| HTR1A   | 0.04761904762 | 0.04761904762 | 0             |  | inf          | #DIV/0! |
| HTR1D   | 0.04761904762 | 0.04761904762 | 0.1111111111  |  | 0.325        | #DIV/0! |
| HTR1F   | 0.04761904762 | 0.04761904762 | 0             |  | inf          | #DIV/0! |
| HTR2B   | 0             | 0             | 0.05555555556 |  | 0            | #DIV/0! |
| HTR3C   | 0.1428571429  | 0.1428571429  | 0.05555555556 |  | 2.333333333  | #DIV/0! |
| HTR3D   | 0.1428571429  | 0.1428571429  | 0.05555555556 |  | 2.333333333  | #DIV/0! |
| HTR3E   | 0.1428571429  | 0.1428571429  | 0.05555555556 |  | 2.333333333  | #DIV/0! |
| TR3E-A  | 0.1428571429  | 0.1428571429  | 0.05555555556 |  | 2.333333333  | #DIV/0! |
| HTR5A   | 0.1428571429  | 0.1428571429  | 0.05555555556 |  | 2.333333333  | #DIV/0! |
| TR5A-A  | 0.1428571429  | 0.1428571429  | 0.05555555556 |  | 2.333333333  | #DIV/0! |
| HTR6    | 0.04761904762 | 0.04761904762 | 0.1111111111  |  | 0.325        | #DIV/0! |
| HTR7    | 0.1428571429  | 0.1428571429  | 0.1111111111  |  | 1.083333333  | #DIV/0! |
| HTR7P1  | 0.04761904762 | 0.04761904762 | 0.05555555556 |  | 0.7          | #DIV/0! |
| HTRA1   | 0.1904761905  | 0.1904761905  | 0.05555555556 |  | 3.294117647  | #DIV/0! |
| HTRA2   | 0             | 0             | 0.05555555556 |  | 0            | #DIV/0! |
| HTRA4   | 0.09523809524 | 0.09523809524 | 0.1111111111  |  | 0.6842105263 | #DIV/0! |



|                |               |               |               |  |              |         |
|----------------|---------------|---------------|---------------|--|--------------|---------|
| <b>HTT</b>     | 0.04761904762 | 0.04761904762 | 0             |  | inf          | #DIV/0! |
| <b>HTT-AS</b>  | 0.04761904762 | 0.04761904762 | 0             |  | inf          | #DIV/0! |
| <b>HUNK</b>    | 0.04761904762 | 0.04761904762 | 0.1111111111  |  | 0.325        | #DIV/0! |
| <b>HUS1</b>    | 0.04761904762 | 0.04761904762 | 0.2222222222  |  | 0.1375       | #DIV/0! |
| <b>HVCN1</b>   | 0             | 0             | 0.1111111111  |  | 0            | #DIV/0! |
| <b>HYAL1</b>   | 0.09523809524 | 0.09523809524 | 0             |  | inf          | #DIV/0! |
| <b>HYAL2</b>   | 0.09523809524 | 0.09523809524 | 0             |  | inf          | #DIV/0! |
| <b>HYAL3</b>   | 0.09523809524 | 0.09523809524 | 0             |  | inf          | #DIV/0! |
| <b>HYAL4</b>   | 0.04761904762 | 0.04761904762 | 0.05555555556 |  | 0.7          | #DIV/0! |
| <b>HYAL6</b>   | 0.04761904762 | 0.04761904762 | 0.05555555556 |  | 0.7          | #DIV/0! |
| <b>HYDIN</b>   | 0.04761904762 | 0.04761904762 | 0             |  | inf          | #DIV/0! |
| <b>HYI</b>     | 0.04761904762 | 0.04761904762 | 0.05555555556 |  | 0.7          | #DIV/0! |
| <b>HYKK</b>    | 0.04761904762 | 0.04761904762 | 0.05555555556 |  | 0.7          | #DIV/0! |
| <b>IAH1</b>    | 0             | 0             | 0.05555555556 |  | 0            | #DIV/0! |
| <b>IAPP</b>    | 0.04761904762 | 0.04761904762 | 0.05555555556 |  | 0.7          | #DIV/0! |
| <b>IARS</b>    | 0.04761904762 | 0.04761904762 | 0.05555555556 |  | 0.7          | #DIV/0! |
| <b>IARS2</b>   | 0.1428571429  | 0.1428571429  | 0.05555555556 |  | 2.333333333  | #DIV/0! |
| <b>IATPR</b>   | 0.09523809524 | 0.09523809524 | 0.2222222222  |  | 0.2894736842 | #DIV/0! |
| <b>IBA57</b>   | 0.1428571429  | 0.1428571429  | 0             |  | inf          | #DIV/0! |
| <b>BA57-D</b>  | 0.1428571429  | 0.1428571429  | 0             |  | inf          | #DIV/0! |
| <b>IBSP</b>    | 0             | 0             | 0.05555555556 |  | 0            | #DIV/0! |
| <b>ICA1</b>    | 0.04761904762 | 0.04761904762 | 0.1666666667  |  | 0.2          | #DIV/0! |
| <b>ICAIL</b>   | 0.09523809524 | 0.09523809524 | 0.05555555556 |  | 1.473684211  | #DIV/0! |
| <b>ICAM2</b>   | 0.04761904762 | 0.04761904762 | 0             |  | inf          | #DIV/0! |
| <b>ICAM3</b>   | 0.1428571429  | 0.1428571429  | 0.1111111111  |  | 1.083333333  | #DIV/0! |
| <b>ICE1</b>    | 0             | 0             | 0.1111111111  |  | 0            | #DIV/0! |
| <b>ICE2</b>    | 0.04761904762 | 0.04761904762 | 0.05555555556 |  | 0.7          | #DIV/0! |
| <b>ICK</b>     | 0.04761904762 | 0.04761904762 | 0             |  | inf          | #DIV/0! |
| <b>ICMT</b>    | 0             | 0             | 0.05555555556 |  | 0            | #DIV/0! |
| <b>ICOS</b>    | 0             | 0             | 0.05555555556 |  | 0            | #DIV/0! |
| <b>COSLG</b>   | 0.04761904762 | 0.04761904762 | 0.1111111111  |  | 0.325        | #DIV/0! |
| <b>ID1</b>     | 0.09523809524 | 0.09523809524 | 0.1111111111  |  | 0.6842105263 | #DIV/0! |
| <b>ID2</b>     | 0             | 0             | 0.05555555556 |  | 0            | #DIV/0! |
| <b>ID2-AS1</b> | 0             | 0             | 0.05555555556 |  | 0            | #DIV/0! |
| <b>ID3</b>     | 0.04761904762 | 0.04761904762 | 0.1111111111  |  | 0.325        | #DIV/0! |
| <b>IDE</b>     | 0.1428571429  | 0.1428571429  | 0.1111111111  |  | 1.083333333  | #DIV/0! |
| <b>IDH1</b>    | 0             | 0             | 0.05555555556 |  | 0            | #DIV/0! |
| <b>DH1-AS</b>  | 0             | 0             | 0.05555555556 |  | 0            | #DIV/0! |
| <b>IDH2</b>    | 0.04761904762 | 0.04761904762 | 0.05555555556 |  | 0.7          | #DIV/0! |
| <b>DH2-DT</b>  | 0.04761904762 | 0.04761904762 | 0.05555555556 |  | 0.7          | #DIV/0! |
| <b>IDH3A</b>   | 0.04761904762 | 0.04761904762 | 0.05555555556 |  | 0.7          | #DIV/0! |
| <b>IDH3B</b>   | 0.1904761905  | 0.1904761905  | 0.05555555556 |  | 3.294117647  | #DIV/0! |
| <b>IDI1</b>    | 0.04761904762 | 0.04761904762 | 0.1111111111  |  | 0.325        | #DIV/0! |
| <b>IDI2</b>    | 0.04761904762 | 0.04761904762 | 0.1111111111  |  | 0.325        | #DIV/0! |
| <b>DI2-AS1</b> | 0.04761904762 | 0.04761904762 | 0.1111111111  |  | 0.325        | #DIV/0! |
| <b>IDNK</b>    | 0             | 0             | 0.05555555556 |  | 0            | #DIV/0! |
| <b>IDO1</b>    | 0.09523809524 | 0.09523809524 | 0.1111111111  |  | 0.6842105263 | #DIV/0! |
| <b>IDO2</b>    | 0.09523809524 | 0.09523809524 | 0.1111111111  |  | 0.6842105263 | #DIV/0! |
| <b>IDUA</b>    | 0.04761904762 | 0.04761904762 | 0             |  | inf          | #DIV/0! |
| <b>IER2</b>    | 0.1428571429  | 0.1428571429  | 0.1111111111  |  | 1.083333333  | #DIV/0! |
| <b>IER3IP1</b> | 0.04761904762 | 0.04761904762 | 0.05555555556 |  | 0.7          | #DIV/0! |

|               |               |               |               |  |              |         |
|---------------|---------------|---------------|---------------|--|--------------|---------|
| <b>IER5</b>   | 0.1428571429  | 0.1428571429  | 0             |  | inf          | #DIV/0! |
| <b>IER5L</b>  | 0.09523809524 | 0.09523809524 | 0.05555555556 |  | 1.473684211  | #DIV/0! |
| <b>IFFO1</b>  | 0.04761904762 | 0.04761904762 | 0.1111111111  |  | 0.325        | #DIV/0! |
| <b>IFFO2</b>  | 0.04761904762 | 0.04761904762 | 0.1111111111  |  | 0.325        | #DIV/0! |
| <b>IFI16</b>  | 0.1428571429  | 0.1428571429  | 0             |  | inf          | #DIV/0! |
| <b>IFI30</b>  | 0.1428571429  | 0.1428571429  | 0.1111111111  |  | 1.083333333  | #DIV/0! |
| <b>IFI35</b>  | 0.04761904762 | 0.04761904762 | 0             |  | inf          | #DIV/0! |
| <b>IFI44</b>  | 0.04761904762 | 0.04761904762 | 0.05555555556 |  | 0.7          | #DIV/0! |
| <b>IFI44L</b> | 0.04761904762 | 0.04761904762 | 0.05555555556 |  | 0.7          | #DIV/0! |
| <b>IFI6</b>   | 0.04761904762 | 0.04761904762 | 0.1111111111  |  | 0.325        | #DIV/0! |
| <b>IFIH1</b>  | 0             | 0             | 0.05555555556 |  | 0            | #DIV/0! |
| <b>IFIT1</b>  | 0.1428571429  | 0.1428571429  | 0.1666666667  |  | 0.6666666667 | #DIV/0! |
| <b>IFIT1B</b> | 0.1428571429  | 0.1428571429  | 0.1666666667  |  | 0.6666666667 | #DIV/0! |
| <b>IFIT2</b>  | 0.1428571429  | 0.1428571429  | 0.1666666667  |  | 0.6666666667 | #DIV/0! |
| <b>IFIT3</b>  | 0.1428571429  | 0.1428571429  | 0.1666666667  |  | 0.6666666667 | #DIV/0! |
| <b>IFIT5</b>  | 0.1428571429  | 0.1428571429  | 0.1111111111  |  | 1.083333333  | #DIV/0! |
| <b>IFITM1</b> | 0.04761904762 | 0.04761904762 | 0             |  | inf          | #DIV/0! |
| <b>FITM10</b> | 0.04761904762 | 0.04761904762 | 0             |  | inf          | #DIV/0! |
| <b>IFITM2</b> | 0.04761904762 | 0.04761904762 | 0             |  | inf          | #DIV/0! |
| <b>IFITM3</b> | 0.04761904762 | 0.04761904762 | 0             |  | inf          | #DIV/0! |
| <b>IFITM5</b> | 0.04761904762 | 0.04761904762 | 0             |  | inf          | #DIV/0! |
| <b>IFNA1</b>  | 0.09523809524 | 0.09523809524 | 0.1111111111  |  | 0.6842105263 | #DIV/0! |
| <b>IFNA10</b> | 0.09523809524 | 0.09523809524 | 0.1111111111  |  | 0.6842105263 | #DIV/0! |
| <b>IFNA13</b> | 0.09523809524 | 0.09523809524 | 0.1111111111  |  | 0.6842105263 | #DIV/0! |
| <b>IFNA14</b> | 0.09523809524 | 0.09523809524 | 0.1111111111  |  | 0.6842105263 | #DIV/0! |
| <b>IFNA16</b> | 0.09523809524 | 0.09523809524 | 0.1111111111  |  | 0.6842105263 | #DIV/0! |
| <b>IFNA17</b> | 0.09523809524 | 0.09523809524 | 0.1111111111  |  | 0.6842105263 | #DIV/0! |
| <b>IFNA2</b>  | 0.09523809524 | 0.09523809524 | 0.1111111111  |  | 0.6842105263 | #DIV/0! |
| <b>IFNA21</b> | 0.09523809524 | 0.09523809524 | 0.1111111111  |  | 0.6842105263 | #DIV/0! |
| <b>FNA22F</b> | 0.09523809524 | 0.09523809524 | 0.1111111111  |  | 0.6842105263 | #DIV/0! |
| <b>IFNA4</b>  | 0.09523809524 | 0.09523809524 | 0.1111111111  |  | 0.6842105263 | #DIV/0! |
| <b>IFNA5</b>  | 0.09523809524 | 0.09523809524 | 0.1111111111  |  | 0.6842105263 | #DIV/0! |
| <b>IFNA6</b>  | 0.09523809524 | 0.09523809524 | 0.1111111111  |  | 0.6842105263 | #DIV/0! |
| <b>IFNA7</b>  | 0.09523809524 | 0.09523809524 | 0.1111111111  |  | 0.6842105263 | #DIV/0! |
| <b>IFNA8</b>  | 0.09523809524 | 0.09523809524 | 0.1111111111  |  | 0.6842105263 | #DIV/0! |
| <b>IFNAR1</b> | 0.04761904762 | 0.04761904762 | 0.1111111111  |  | 0.325        | #DIV/0! |
| <b>IFNAR2</b> | 0.04761904762 | 0.04761904762 | 0.1111111111  |  | 0.325        | #DIV/0! |
| <b>IFNB1</b>  | 0.09523809524 | 0.09523809524 | 0.1111111111  |  | 0.6842105263 | #DIV/0! |
| <b>IFNE</b>   | 0.09523809524 | 0.09523809524 | 0.1111111111  |  | 0.6842105263 | #DIV/0! |
| <b>IFNG</b>   | 0.09523809524 | 0.09523809524 | 0.05555555556 |  | 1.473684211  | #DIV/0! |
| <b>FNG-AS</b> | 0.09523809524 | 0.09523809524 | 0.05555555556 |  | 1.473684211  | #DIV/0! |
| <b>IFNGR2</b> | 0.04761904762 | 0.04761904762 | 0.1111111111  |  | 0.325        | #DIV/0! |
| <b>IFNK</b>   | 0.04761904762 | 0.04761904762 | 0.05555555556 |  | 0.7          | #DIV/0! |
| <b>IFNL1</b>  | 0.04761904762 | 0.04761904762 | 0.05555555556 |  | 0.7          | #DIV/0! |
| <b>IFNL2</b>  | 0.04761904762 | 0.04761904762 | 0.05555555556 |  | 0.7          | #DIV/0! |
| <b>IFNL3</b>  | 0.04761904762 | 0.04761904762 | 0.05555555556 |  | 0.7          | #DIV/0! |
| <b>IFNL4</b>  | 0.04761904762 | 0.04761904762 | 0.05555555556 |  | 0.7          | #DIV/0! |
| <b>IFNLR1</b> | 0.04761904762 | 0.04761904762 | 0.1111111111  |  | 0.325        | #DIV/0! |
| <b>IFNW1</b>  | 0.09523809524 | 0.09523809524 | 0.1111111111  |  | 0.6842105263 | #DIV/0! |
| <b>IFRD1</b>  | 0.04761904762 | 0.04761904762 | 0.05555555556 |  | 0.7          | #DIV/0! |
| <b>IFRD2</b>  | 0.09523809524 | 0.09523809524 | 0             |  | inf          | #DIV/0! |

|                  |               |               |               |  |              |         |
|------------------|---------------|---------------|---------------|--|--------------|---------|
| <b>IFT122</b>    | 0.09523809524 | 0.09523809524 | 0.05555555556 |  | 1.473684211  | #DIV/0! |
| <b>IFT140</b>    | 0.09523809524 | 0.09523809524 | 0.2222222222  |  | 0.2894736842 | #DIV/0! |
| <b>IFT20</b>     | 0.04761904762 | 0.04761904762 | 0.05555555556 |  | 0.7          | #DIV/0! |
| <b>IFT22</b>     | 0.04761904762 | 0.04761904762 | 0.05555555556 |  | 0.7          | #DIV/0! |
| <b>IFT27</b>     | 0             | 0             | 0.1111111111  |  | 0            | #DIV/0! |
| <b>IFT52</b>     | 0.1428571429  | 0.1428571429  | 0.1111111111  |  | 1.083333333  | #DIV/0! |
| <b>IFT57</b>     | 0.09523809524 | 0.09523809524 | 0.05555555556 |  | 1.473684211  | #DIV/0! |
| <b>IFT74</b>     | 0.04761904762 | 0.04761904762 | 0.05555555556 |  | 0.7          | #DIV/0! |
| <b>IFT74-AS</b>  | 0.04761904762 | 0.04761904762 | 0.05555555556 |  | 0.7          | #DIV/0! |
| <b>IFT80</b>     | 0.1428571429  | 0.1428571429  | 0.05555555556 |  | 2.333333333  | #DIV/0! |
| <b>IFT81</b>     | 0             | 0             | 0.1111111111  |  | 0            | #DIV/0! |
| <b>IFT88</b>     | 0.04761904762 | 0.04761904762 | 0             |  | inf          | #DIV/0! |
| <b>GBP1P</b>     | 0.09523809524 | 0.09523809524 | 0             |  | inf          | #DIV/0! |
| <b>IGDCC3</b>    | 0.04761904762 | 0.04761904762 | 0.05555555556 |  | 0.7          | #DIV/0! |
| <b>IGDCC4</b>    | 0.04761904762 | 0.04761904762 | 0.05555555556 |  | 0.7          | #DIV/0! |
| <b>IGF1</b>      | 0.04761904762 | 0.04761904762 | 0.05555555556 |  | 0.7          | #DIV/0! |
| <b>IGF1R</b>     | 0.04761904762 | 0.04761904762 | 0.05555555556 |  | 0.7          | #DIV/0! |
| <b>IGF2</b>      | 0.04761904762 | 0.04761904762 | 0             |  | inf          | #DIV/0! |
| <b>IGF2-AS</b>   | 0.04761904762 | 0.04761904762 | 0             |  | inf          | #DIV/0! |
| <b>IGF2BP1</b>   | 0.1428571429  | 0.1428571429  | 0             |  | inf          | #DIV/0! |
| <b>IGF2BP2</b>   | 0.1428571429  | 0.1428571429  | 0.05555555556 |  | 2.333333333  | #DIV/0! |
| <b>IGF2BP2-A</b> | 0.1428571429  | 0.1428571429  | 0.05555555556 |  | 2.333333333  | #DIV/0! |
| <b>IGF2BP3</b>   | 0.04761904762 | 0.04761904762 | 0.1666666667  |  | 0.2          | #DIV/0! |
| <b>IGFALS</b>    | 0.09523809524 | 0.09523809524 | 0.2222222222  |  | 0.2894736842 | #DIV/0! |
| <b>IGFBP1</b>    | 0.04761904762 | 0.04761904762 | 0.2222222222  |  | 0.1375       | #DIV/0! |
| <b>IGFBP2</b>    | 0             | 0             | 0.1111111111  |  | 0            | #DIV/0! |
| <b>IGFBP3</b>    | 0.04761904762 | 0.04761904762 | 0.2222222222  |  | 0.1375       | #DIV/0! |
| <b>IGFBP4</b>    | 0.09523809524 | 0.09523809524 | 0             |  | inf          | #DIV/0! |
| <b>IGFBP5</b>    | 0             | 0             | 0.1111111111  |  | 0            | #DIV/0! |
| <b>IGFBP6</b>    | 0.04761904762 | 0.04761904762 | 0.05555555556 |  | 0.7          | #DIV/0! |
| <b>IGFBP7</b>    | 0.1904761905  | 0.1904761905  | 0.05555555556 |  | 3.294117647  | #DIV/0! |
| <b>IGFBP7-A</b>  | 0.1904761905  | 0.1904761905  | 0.05555555556 |  | 3.294117647  | #DIV/0! |
| <b>IGFBPL</b>    | 0.04761904762 | 0.04761904762 | 0.05555555556 |  | 0.7          | #DIV/0! |
| <b>IGFL1</b>     | 0.09523809524 | 0.09523809524 | 0.1111111111  |  | 0.6842105263 | #DIV/0! |
| <b>IGFL2</b>     | 0.09523809524 | 0.09523809524 | 0.1111111111  |  | 0.6842105263 | #DIV/0! |
| <b>IGFL2-AS</b>  | 0.09523809524 | 0.09523809524 | 0.1111111111  |  | 0.6842105263 | #DIV/0! |
| <b>IGFL3</b>     | 0.09523809524 | 0.09523809524 | 0.1111111111  |  | 0.6842105263 | #DIV/0! |
| <b>IGFLR1</b>    | 0.04761904762 | 0.04761904762 | 0.05555555556 |  | 0.7          | #DIV/0! |
| <b>IGFN1</b>     | 0.1428571429  | 0.1428571429  | 0             |  | inf          | #DIV/0! |
| <b>IVIOR1</b>    | 0.2380952381  | 0.2380952381  | 0.1111111111  |  | 2.03125      | #DIV/0! |
| <b>IVIOR1</b>    | 0.2380952381  | 0.2380952381  | 0.1111111111  |  | 2.03125      | #DIV/0! |
| <b>IGIP</b>      | 0.04761904762 | 0.04761904762 | 0             |  | inf          | #DIV/0! |
| <b>IGSF10</b>    | 0.1904761905  | 0.1904761905  | 0.1111111111  |  | 1.529411765  | #DIV/0! |
| <b>IGSF11</b>    | 0.09523809524 | 0.09523809524 | 0.05555555556 |  | 1.473684211  | #DIV/0! |
| <b>IGSF11-AS</b> | 0.09523809524 | 0.09523809524 | 0.05555555556 |  | 1.473684211  | #DIV/0! |
| <b>IGSF21</b>    | 0.04761904762 | 0.04761904762 | 0.05555555556 |  | 0.7          | #DIV/0! |
| <b>IGSF23</b>    | 0.09523809524 | 0.09523809524 | 0.05555555556 |  | 1.473684211  | #DIV/0! |
| <b>IGSF3</b>     | 0.04761904762 | 0.04761904762 | 0.05555555556 |  | 0.7          | #DIV/0! |
| <b>IGSF5</b>     | 0.04761904762 | 0.04761904762 | 0.05555555556 |  | 0.7          | #DIV/0! |
| <b>IGSF6</b>     | 0.04761904762 | 0.04761904762 | 0             |  | inf          | #DIV/0! |
| <b>IGSF8</b>     | 0.1428571429  | 0.1428571429  | 0             |  | inf          | #DIV/0! |

|                 |               |               |               |  |              |         |
|-----------------|---------------|---------------|---------------|--|--------------|---------|
| <b>IGSF9</b>    | 0.1428571429  | 0.1428571429  | 0             |  | inf          | #DIV/0! |
| <b>IHH</b>      | 0             | 0             | 0.05555555556 |  | 0            | #DIV/0! |
| <b>IK</b>       | 0.04761904762 | 0.04761904762 | 0             |  | inf          | #DIV/0! |
| <b>IKBIP</b>    | 0.04761904762 | 0.04761904762 | 0.05555555556 |  | 0.7          | #DIV/0! |
| <b>IKBKB</b>    | 0.09523809524 | 0.09523809524 | 0.16666666667 |  | 0.4210526316 | #DIV/0! |
| <b>IKBKE</b>    | 0.1428571429  | 0.1428571429  | 0             |  | inf          | #DIV/0! |
| <b>IKZF1</b>    | 0.09523809524 | 0.09523809524 | 0.22222222222 |  | 0.2894736842 | #DIV/0! |
| <b>IKZF2</b>    | 0             | 0             | 0.05555555556 |  | 0            | #DIV/0! |
| <b>IKZF3</b>    | 0.09523809524 | 0.09523809524 | 0             |  | inf          | #DIV/0! |
| <b>IKZF4</b>    | 0.09523809524 | 0.09523809524 | 0.05555555556 |  | 1.473684211  | #DIV/0! |
| <b>IKZF5</b>    | 0.2380952381  | 0.2380952381  | 0.05555555556 |  | 4.375        | #DIV/0! |
| <b>IL10</b>     | 0.1428571429  | 0.1428571429  | 0             |  | inf          | #DIV/0! |
| <b>IL10RB</b>   | 0.04761904762 | 0.04761904762 | 0.11111111111 |  | 0.325        | #DIV/0! |
| <b>IL10RB-D</b> | 0.04761904762 | 0.04761904762 | 0.11111111111 |  | 0.325        | #DIV/0! |
| <b>IL11</b>     | 0.09523809524 | 0.09523809524 | 0.05555555556 |  | 1.473684211  | #DIV/0! |
| <b>IL11RA</b>   | 0.09523809524 | 0.09523809524 | 0.05555555556 |  | 1.473684211  | #DIV/0! |
| <b>IL12A</b>    | 0.1428571429  | 0.1428571429  | 0.05555555556 |  | 2.333333333  | #DIV/0! |
| <b>IL12A-AS</b> | 0.1428571429  | 0.1428571429  | 0.05555555556 |  | 2.333333333  | #DIV/0! |
| <b>IL12B</b>    | 0.04761904762 | 0.04761904762 | 0.05555555556 |  | 0.7          | #DIV/0! |
| <b>IL12RB1</b>  | 0.1428571429  | 0.1428571429  | 0.11111111111 |  | 1.083333333  | #DIV/0! |
| <b>IL12RB2</b>  | 0.04761904762 | 0.04761904762 | 0.05555555556 |  | 0.7          | #DIV/0! |
| <b>IL13</b>     | 0.04761904762 | 0.04761904762 | 0             |  | inf          | #DIV/0! |
| <b>IL15</b>     | 0             | 0             | 0.05555555556 |  | 0            | #DIV/0! |
| <b>IL15RA</b>   | 0.09523809524 | 0.09523809524 | 0.11111111111 |  | 0.6842105263 | #DIV/0! |
| <b>IL16</b>     | 0.04761904762 | 0.04761904762 | 0.05555555556 |  | 0.7          | #DIV/0! |
| <b>IL17A</b>    | 0.04761904762 | 0.04761904762 | 0             |  | inf          | #DIV/0! |
| <b>IL17C</b>    | 0.1428571429  | 0.1428571429  | 0             |  | inf          | #DIV/0! |
| <b>IL17D</b>    | 0.04761904762 | 0.04761904762 | 0             |  | inf          | #DIV/0! |
| <b>IL17F</b>    | 0.04761904762 | 0.04761904762 | 0             |  | inf          | #DIV/0! |
| <b>IL17RA</b>   | 0.04761904762 | 0.04761904762 | 0             |  | inf          | #DIV/0! |
| <b>IL17RB</b>   | 0.04761904762 | 0.04761904762 | 0             |  | inf          | #DIV/0! |
| <b>IL17RC</b>   | 0.09523809524 | 0.09523809524 | 0             |  | inf          | #DIV/0! |
| <b>IL17RD</b>   | 0.04761904762 | 0.04761904762 | 0             |  | inf          | #DIV/0! |
| <b>IL17RE</b>   | 0.09523809524 | 0.09523809524 | 0             |  | inf          | #DIV/0! |
| <b>IL17REI</b>  | 0             | 0             | 0.11111111111 |  | 0            | #DIV/0! |
| <b>IL18R1</b>   | 0             | 0             | 0.05555555556 |  | 0            | #DIV/0! |
| <b>IL18RAI</b>  | 0             | 0             | 0.05555555556 |  | 0            | #DIV/0! |
| <b>IL19</b>     | 0.1428571429  | 0.1428571429  | 0             |  | inf          | #DIV/0! |
| <b>IL1A</b>     | 0             | 0             | 0.05555555556 |  | 0            | #DIV/0! |
| <b>IL1B</b>     | 0             | 0             | 0.05555555556 |  | 0            | #DIV/0! |
| <b>IL1F10</b>   | 0             | 0             | 0.05555555556 |  | 0            | #DIV/0! |
| <b>IL1R1</b>    | 0             | 0             | 0.05555555556 |  | 0            | #DIV/0! |
| <b>IL1R2</b>    | 0             | 0             | 0.05555555556 |  | 0            | #DIV/0! |
| <b>IL1RAP</b>   | 0.09523809524 | 0.09523809524 | 0.11111111111 |  | 0.6842105263 | #DIV/0! |
| <b>IL1RL1</b>   | 0             | 0             | 0.05555555556 |  | 0            | #DIV/0! |
| <b>IL1RL2</b>   | 0             | 0             | 0.05555555556 |  | 0            | #DIV/0! |
| <b>IL1RN</b>    | 0             | 0             | 0.05555555556 |  | 0            | #DIV/0! |
| <b>IL2</b>      | 0             | 0             | 0.05555555556 |  | 0            | #DIV/0! |
| <b>IL20</b>     | 0.1428571429  | 0.1428571429  | 0             |  | inf          | #DIV/0! |
| <b>IL20RB</b>   | 0.1904761905  | 0.1904761905  | 0.05555555556 |  | 3.294117647  | #DIV/0! |
| <b>IL21</b>     | 0             | 0             | 0.05555555556 |  | 0            | #DIV/0! |

|         |               |               |               |  |              |         |
|---------|---------------|---------------|---------------|--|--------------|---------|
| L21-AS1 | 0             | 0             | 0.05555555556 |  | 0            | #DIV/0! |
| IL21R   | 0.04761904762 | 0.04761904762 | 0             |  | inf          | #DIV/0! |
| L21R-AS | 0.04761904762 | 0.04761904762 | 0             |  | inf          | #DIV/0! |
| IL22    | 0.09523809524 | 0.09523809524 | 0.05555555556 |  | 1.473684211  | #DIV/0! |
| L22RA1  | 0.04761904762 | 0.04761904762 | 0.1111111111  |  | 0.325        | #DIV/0! |
| IL23A   | 0.1428571429  | 0.1428571429  | 0.05555555556 |  | 2.333333333  | #DIV/0! |
| IL23R   | 0.04761904762 | 0.04761904762 | 0.05555555556 |  | 0.7          | #DIV/0! |
| IL24    | 0.1428571429  | 0.1428571429  | 0             |  | inf          | #DIV/0! |
| IL25    | 0             | 0             | 0.05555555556 |  | 0            | #DIV/0! |
| IL26    | 0.09523809524 | 0.09523809524 | 0.05555555556 |  | 1.473684211  | #DIV/0! |
| IL27    | 0.04761904762 | 0.04761904762 | 0             |  | inf          | #DIV/0! |
| IL27RA  | 0.1428571429  | 0.1428571429  | 0.1111111111  |  | 1.083333333  | #DIV/0! |
| IL2RA   | 0.09523809524 | 0.09523809524 | 0.1111111111  |  | 0.6842105263 | #DIV/0! |
| IL2RB   | 0             | 0             | 0.1111111111  |  | 0            | #DIV/0! |
| IL3     | 0.04761904762 | 0.04761904762 | 0             |  | inf          | #DIV/0! |
| IL31    | 0.04761904762 | 0.04761904762 | 0.1111111111  |  | 0.325        | #DIV/0! |
| IL31RA  | 0.04761904762 | 0.04761904762 | 0.05555555556 |  | 0.7          | #DIV/0! |
| IL32    | 0.04761904762 | 0.04761904762 | 0.1111111111  |  | 0.325        | #DIV/0! |
| IL33    | 0.04761904762 | 0.04761904762 | 0.05555555556 |  | 0.7          | #DIV/0! |
| IL34    | 0.1428571429  | 0.1428571429  | 0.05555555556 |  | 2.333333333  | #DIV/0! |
| IL36A   | 0             | 0             | 0.05555555556 |  | 0            | #DIV/0! |
| IL36B   | 0             | 0             | 0.05555555556 |  | 0            | #DIV/0! |
| IL36G   | 0             | 0             | 0.05555555556 |  | 0            | #DIV/0! |
| IL36RN  | 0             | 0             | 0.05555555556 |  | 0            | #DIV/0! |
| IL37    | 0             | 0             | 0.05555555556 |  | 0            | #DIV/0! |
| IL4     | 0.04761904762 | 0.04761904762 | 0             |  | inf          | #DIV/0! |
| IL4I1   | 0.09523809524 | 0.09523809524 | 0.1111111111  |  | 0.6842105263 | #DIV/0! |
| IL4R    | 0.04761904762 | 0.04761904762 | 0             |  | inf          | #DIV/0! |
| IL5     | 0.04761904762 | 0.04761904762 | 0             |  | inf          | #DIV/0! |
| IL5RA   | 0.04761904762 | 0.04761904762 | 0             |  | inf          | #DIV/0! |
| IL6     | 0.04761904762 | 0.04761904762 | 0.1666666667  |  | 0.2          | #DIV/0! |
| IL6R    | 0.1904761905  | 0.1904761905  | 0.05555555556 |  | 3.294117647  | #DIV/0! |
| L6R-AS  | 0.1904761905  | 0.1904761905  | 0.05555555556 |  | 3.294117647  | #DIV/0! |
| IL6ST   | 0.04761904762 | 0.04761904762 | 0.05555555556 |  | 0.7          | #DIV/0! |
| IL7     | 0.1428571429  | 0.1428571429  | 0.1111111111  |  | 1.083333333  | #DIV/0! |
| IL7R    | 0.04761904762 | 0.04761904762 | 0.05555555556 |  | 0.7          | #DIV/0! |
| IL9     | 0.04761904762 | 0.04761904762 | 0             |  | inf          | #DIV/0! |
| ILDRI   | 0.09523809524 | 0.09523809524 | 0.05555555556 |  | 1.473684211  | #DIV/0! |
| ILDR2   | 0.1428571429  | 0.1428571429  | 0             |  | inf          | #DIV/0! |
| ILF2    | 0.1904761905  | 0.1904761905  | 0.05555555556 |  | 3.294117647  | #DIV/0! |
| ILF3    | 0.1428571429  | 0.1428571429  | 0.1111111111  |  | 1.083333333  | #DIV/0! |
| ILF3-DI | 0.1428571429  | 0.1428571429  | 0.1111111111  |  | 1.083333333  | #DIV/0! |
| ILK     | 0.04761904762 | 0.04761904762 | 0             |  | inf          | #DIV/0! |
| ILKAP   | 0             | 0             | 0.05555555556 |  | 0            | #DIV/0! |
| ILRUN   | 0.04761904762 | 0.04761904762 | 0             |  | inf          | #DIV/0! |
| ILVBL   | 0.1428571429  | 0.1428571429  | 0.1111111111  |  | 1.083333333  | #DIV/0! |
| MMP21   | 0.04761904762 | 0.04761904762 | 0.05555555556 |  | 0.7          | #DIV/0! |
| IMMT    | 0             | 0             | 0.05555555556 |  | 0            | #DIV/0! |
| IMP3    | 0.04761904762 | 0.04761904762 | 0.05555555556 |  | 0.7          | #DIV/0! |
| IMP4    | 0             | 0             | 0.05555555556 |  | 0            | #DIV/0! |
| IMPA1   | 0.1428571429  | 0.1428571429  | 0.1111111111  |  | 1.083333333  | #DIV/0! |

|                |               |               |               |  |              |         |
|----------------|---------------|---------------|---------------|--|--------------|---------|
| <b>MPA1P</b>   | 0.1428571429  | 0.1428571429  | 0.1111111111  |  | 1.083333333  | #DIV/0! |
| <b>IMPA2</b>   | 0.09523809524 | 0.09523809524 | 0.05555555556 |  | 1.473684211  | #DIV/0! |
| <b>IMPACT</b>  | 0.09523809524 | 0.09523809524 | 0.05555555556 |  | 1.473684211  | #DIV/0! |
| <b>IMPAD1</b>  | 0.1428571429  | 0.1428571429  | 0.1111111111  |  | 1.083333333  | #DIV/0! |
| <b>MPDH1</b>   | 0.04761904762 | 0.04761904762 | 0.05555555556 |  | 0.7          | #DIV/0! |
| <b>MPDH2</b>   | 0.09523809524 | 0.09523809524 | 0             |  | inf          | #DIV/0! |
| <b>IMPG2</b>   | 0.09523809524 | 0.09523809524 | 0.05555555556 |  | 1.473684211  | #DIV/0! |
| <b>INA</b>     | 0.1428571429  | 0.1428571429  | 0.05555555556 |  | 2.333333333  | #DIV/0! |
| <b>NAFM1</b>   | 0.09523809524 | 0.09523809524 | 0.1111111111  |  | 0.6842105263 | #DIV/0! |
| <b>INAVA</b>   | 0.1428571429  | 0.1428571429  | 0             |  | inf          | #DIV/0! |
| <b>INCA1</b>   | 0             | 0             | 0.1111111111  |  | 0            | #DIV/0! |
| <b>ING2</b>    | 0             | 0             | 0.05555555556 |  | 0            | #DIV/0! |
| <b>ING3</b>    | 0.04761904762 | 0.04761904762 | 0.05555555556 |  | 0.7          | #DIV/0! |
| <b>ING4</b>    | 0.04761904762 | 0.04761904762 | 0.1111111111  |  | 0.325        | #DIV/0! |
| <b>ING5</b>    | 0             | 0             | 0.05555555556 |  | 0            | #DIV/0! |
| <b>INHA</b>    | 0             | 0             | 0.05555555556 |  | 0            | #DIV/0! |
| <b>INHBA</b>   | 0.09523809524 | 0.09523809524 | 0.2222222222  |  | 0.2894736842 | #DIV/0! |
| <b>HBA-AS</b>  | 0.09523809524 | 0.09523809524 | 0.2222222222  |  | 0.2894736842 | #DIV/0! |
| <b>INHBB</b>   | 0             | 0             | 0.05555555556 |  | 0            | #DIV/0! |
| <b>INIP</b>    | 0.04761904762 | 0.04761904762 | 0.05555555556 |  | 0.7          | #DIV/0! |
| <b>INKA1</b>   | 0.09523809524 | 0.09523809524 | 0             |  | inf          | #DIV/0! |
| <b>INKA2</b>   | 0.04761904762 | 0.04761904762 | 0             |  | inf          | #DIV/0! |
| <b>KA2-AS</b>  | 0.04761904762 | 0.04761904762 | 0             |  | inf          | #DIV/0! |
| <b>INMT</b>    | 0.04761904762 | 0.04761904762 | 0.1111111111  |  | 0.325        | #DIV/0! |
| <b>IT-MINI</b> | 0.04761904762 | 0.04761904762 | 0.1111111111  |  | 0.325        | #DIV/0! |
| <b>INO80B</b>  | 0             | 0             | 0.05555555556 |  | 0            | #DIV/0! |
| <b>80B-WI</b>  | 0             | 0             | 0.05555555556 |  | 0            | #DIV/0! |
| <b>INO80C</b>  | 0.09523809524 | 0.09523809524 | 0             |  | inf          | #DIV/0! |
| <b>INO80D</b>  | 0             | 0             | 0.05555555556 |  | 0            | #DIV/0! |
| <b>INO80E</b>  | 0.04761904762 | 0.04761904762 | 0             |  | inf          | #DIV/0! |
| <b>INPP1</b>   | 0             | 0             | 0.05555555556 |  | 0            | #DIV/0! |
| <b>INPP4A</b>  | 0             | 0             | 0.05555555556 |  | 0            | #DIV/0! |
| <b>INPP4B</b>  | 0             | 0             | 0.05555555556 |  | 0            | #DIV/0! |
| <b>INPP5A</b>  | 0.2380952381  | 0.2380952381  | 0             |  | inf          | #DIV/0! |
| <b>INPP5B</b>  | 0.04761904762 | 0.04761904762 | 0.05555555556 |  | 0.7          | #DIV/0! |
| <b>INPP5D</b>  | 0             | 0             | 0.05555555556 |  | 0            | #DIV/0! |
| <b>INPP5E</b>  | 0.1428571429  | 0.1428571429  | 0.05555555556 |  | 2.333333333  | #DIV/0! |
| <b>INPP5F</b>  | 0.2380952381  | 0.2380952381  | 0             |  | inf          | #DIV/0! |
| <b>INPP5J</b>  | 0.04761904762 | 0.04761904762 | 0.1111111111  |  | 0.325        | #DIV/0! |
| <b>INPP5K</b>  | 0             | 0             | 0.1111111111  |  | 0            | #DIV/0! |
| <b>INS</b>     | 0.04761904762 | 0.04761904762 | 0             |  | inf          | #DIV/0! |
| <b>NS-IGF2</b> | 0.04761904762 | 0.04761904762 | 0             |  | inf          | #DIV/0! |
| <b>INSIG1</b>  | 0.1428571429  | 0.1428571429  | 0.05555555556 |  | 2.333333333  | #DIV/0! |
| <b>INSIG2</b>  | 0             | 0             | 0.05555555556 |  | 0            | #DIV/0! |
| <b>INSL3</b>   | 0.1428571429  | 0.1428571429  | 0.1111111111  |  | 1.083333333  | #DIV/0! |
| <b>INSL4</b>   | 0.04761904762 | 0.04761904762 | 0.05555555556 |  | 0.7          | #DIV/0! |
| <b>INSL5</b>   | 0.04761904762 | 0.04761904762 | 0.05555555556 |  | 0.7          | #DIV/0! |
| <b>INSL6</b>   | 0.04761904762 | 0.04761904762 | 0.05555555556 |  | 0.7          | #DIV/0! |
| <b>INSM1</b>   | 0.1904761905  | 0.1904761905  | 0.05555555556 |  | 3.294117647  | #DIV/0! |
| <b>INSM2</b>   | 0.09523809524 | 0.09523809524 | 0             |  | inf          | #DIV/0! |
| <b>INSR</b>    | 0.1428571429  | 0.1428571429  | 0.05555555556 |  | 2.333333333  | #DIV/0! |

|          |               |               |               |  |              |         |
|----------|---------------|---------------|---------------|--|--------------|---------|
| INSRR    | 0.1428571429  | 0.1428571429  | 0.05555555556 |  | 2.333333333  | #DIV/0! |
| INSYN1   | 0.04761904762 | 0.04761904762 | 0.05555555556 |  | 0.7          | #DIV/0! |
| SYN1-A   | 0.04761904762 | 0.04761904762 | 0.05555555556 |  | 0.7          | #DIV/0! |
| NSYN2A   | 0.2380952381  | 0.2380952381  | 0.05555555556 |  | 4.375        | #DIV/0! |
| NSYN2E   | 0             | 0             | 0.05555555556 |  | 0            | #DIV/0! |
| INTS1    | 0.04761904762 | 0.04761904762 | 0.1666666667  |  | 0.2          | #DIV/0! |
| INTS10   | 0.09523809524 | 0.09523809524 | 0.1111111111  |  | 0.6842105263 | #DIV/0! |
| INTS11   | 0             | 0             | 0.1111111111  |  | 0            | #DIV/0! |
| INTS12   | 0             | 0             | 0.05555555556 |  | 0            | #DIV/0! |
| INTS13   | 0.04761904762 | 0.04761904762 | 0.05555555556 |  | 0.7          | #DIV/0! |
| INTS14   | 0.04761904762 | 0.04761904762 | 0.05555555556 |  | 0.7          | #DIV/0! |
| INTS2    | 0.09523809524 | 0.09523809524 | 0             |  | inf          | #DIV/0! |
| INTS3    | 0.1904761905  | 0.1904761905  | 0.05555555556 |  | 3.294117647  | #DIV/0! |
| INTS4P1  | 0.04761904762 | 0.04761904762 | 0.1111111111  |  | 0.325        | #DIV/0! |
| INTS4P2  | 0.04761904762 | 0.04761904762 | 0.1111111111  |  | 0.325        | #DIV/0! |
| INTS7    | 0.1428571429  | 0.1428571429  | 0             |  | inf          | #DIV/0! |
| INTS8    | 0.1904761905  | 0.1904761905  | 0.1111111111  |  | 1.529411765  | #DIV/0! |
| INTS9    | 0.04761904762 | 0.04761904762 | 0.1111111111  |  | 0.325        | #DIV/0! |
| INTU     | 0             | 0             | 0.05555555556 |  | 0            | #DIV/0! |
| INVS     | 0.04761904762 | 0.04761904762 | 0             |  | inf          | #DIV/0! |
| IP6K1    | 0.09523809524 | 0.09523809524 | 0             |  | inf          | #DIV/0! |
| IP6K2    | 0.09523809524 | 0.09523809524 | 0             |  | inf          | #DIV/0! |
| IP6K3    | 0.04761904762 | 0.04761904762 | 0             |  | inf          | #DIV/0! |
| IPMK     | 0.09523809524 | 0.09523809524 | 0.05555555556 |  | 1.473684211  | #DIV/0! |
| IPO11    | 0.04761904762 | 0.04761904762 | 0             |  | inf          | #DIV/0! |
| I1-LRR   | 0.04761904762 | 0.04761904762 | 0             |  | inf          | #DIV/0! |
| IPO13    | 0.04761904762 | 0.04761904762 | 0.05555555556 |  | 0.7          | #DIV/0! |
| IPO5P1   | 0.09523809524 | 0.09523809524 | 0             |  | inf          | #DIV/0! |
| IPO7     | 0.04761904762 | 0.04761904762 | 0.05555555556 |  | 0.7          | #DIV/0! |
| IPO8     | 0.04761904762 | 0.04761904762 | 0.05555555556 |  | 0.7          | #DIV/0! |
| IPO9     | 0.1428571429  | 0.1428571429  | 0             |  | inf          | #DIV/0! |
| PO9-AS   | 0.1428571429  | 0.1428571429  | 0             |  | inf          | #DIV/0! |
| IPP      | 0.04761904762 | 0.04761904762 | 0.05555555556 |  | 0.7          | #DIV/0! |
| IPPK     | 0.04761904762 | 0.04761904762 | 0.05555555556 |  | 0.7          | #DIV/0! |
| IQCA1    | 0             | 0             | 0.05555555556 |  | 0            | #DIV/0! |
| IQCA1L   | 0.09523809524 | 0.09523809524 | 0.05555555556 |  | 1.473684211  | #DIV/0! |
| IQCB1    | 0.09523809524 | 0.09523809524 | 0.05555555556 |  | 1.473684211  | #DIV/0! |
| IQCC     | 0.04761904762 | 0.04761904762 | 0.1111111111  |  | 0.325        | #DIV/0! |
| IQCD     | 0             | 0             | 0.05555555556 |  | 0            | #DIV/0! |
| IQCE     | 0.04761904762 | 0.04761904762 | 0.1666666667  |  | 0.2          | #DIV/0! |
| IQCF1    | 0.04761904762 | 0.04761904762 | 0             |  | inf          | #DIV/0! |
| IQCF2    | 0.04761904762 | 0.04761904762 | 0             |  | inf          | #DIV/0! |
| IQCF3    | 0.04761904762 | 0.04761904762 | 0             |  | inf          | #DIV/0! |
| IQCF4    | 0.04761904762 | 0.04761904762 | 0             |  | inf          | #DIV/0! |
| IQCF5    | 0.04761904762 | 0.04761904762 | 0             |  | inf          | #DIV/0! |
| IQCF5-AS | 0.04761904762 | 0.04761904762 | 0             |  | inf          | #DIV/0! |
| IQCF6    | 0.04761904762 | 0.04761904762 | 0             |  | inf          | #DIV/0! |
| IQCG     | 0.1428571429  | 0.1428571429  | 0.05555555556 |  | 2.333333333  | #DIV/0! |
| IQCH     | 0.04761904762 | 0.04761904762 | 0.05555555556 |  | 0.7          | #DIV/0! |
| IQCH-AS  | 0.04761904762 | 0.04761904762 | 0.05555555556 |  | 0.7          | #DIV/0! |
| IQCJ     | 0.1428571429  | 0.1428571429  | 0.05555555556 |  | 2.333333333  | #DIV/0! |

|         |               |               |               |  |              |         |
|---------|---------------|---------------|---------------|--|--------------|---------|
| CJ-SCHI | 0.1428571429  | 0.1428571429  | 0.05555555556 |  | 2.333333333  | #DIV/0! |
| -SCHIP1 | 0.1428571429  | 0.1428571429  | 0.05555555556 |  | 2.333333333  | #DIV/0! |
| IQCK    | 0.04761904762 | 0.04761904762 | 0             |  | inf          | #DIV/0! |
| IQCM    | 0             | 0             | 0.05555555556 |  | 0            | #DIV/0! |
| IQCN    | 0.1428571429  | 0.1428571429  | 0.1111111111  |  | 1.083333333  | #DIV/0! |
| IQGAP1  | 0.04761904762 | 0.04761904762 | 0.05555555556 |  | 0.7          | #DIV/0! |
| IQGAP2  | 0.04761904762 | 0.04761904762 | 0             |  | inf          | #DIV/0! |
| IQGAP3  | 0.1428571429  | 0.1428571429  | 0.1111111111  |  | 1.083333333  | #DIV/0! |
| IQSEC1  | 0.04761904762 | 0.04761904762 | 0             |  | inf          | #DIV/0! |
| IQSEC3  | 0.04761904762 | 0.04761904762 | 0.1111111111  |  | 0.325        | #DIV/0! |
| IQUB    | 0.04761904762 | 0.04761904762 | 0.05555555556 |  | 0.7          | #DIV/0! |
| IRAIN   | 0.04761904762 | 0.04761904762 | 0.05555555556 |  | 0.7          | #DIV/0! |
| IRAK2   | 0.09523809524 | 0.09523809524 | 0             |  | inf          | #DIV/0! |
| IRAK3   | 0.09523809524 | 0.09523809524 | 0.05555555556 |  | 1.473684211  | #DIV/0! |
| IRAK4   | 0.04761904762 | 0.04761904762 | 0.05555555556 |  | 0.7          | #DIV/0! |
| IREB2   | 0.04761904762 | 0.04761904762 | 0.05555555556 |  | 0.7          | #DIV/0! |
| IRF1    | 0.04761904762 | 0.04761904762 | 0             |  | inf          | #DIV/0! |
| IRF2    | 0             | 0             | 0.05555555556 |  | 0            | #DIV/0! |
| RF2BP1  | 0.09523809524 | 0.09523809524 | 0.1111111111  |  | 0.6842105263 | #DIV/0! |
| RF2BP2  | 0.09523809524 | 0.09523809524 | 0.05555555556 |  | 1.473684211  | #DIV/0! |
| IRF3    | 0.09523809524 | 0.09523809524 | 0.1111111111  |  | 0.6842105263 | #DIV/0! |
| IRF5    | 0.04761904762 | 0.04761904762 | 0.05555555556 |  | 0.7          | #DIV/0! |
| IRF6    | 0.1428571429  | 0.1428571429  | 0             |  | inf          | #DIV/0! |
| IRF7    | 0.04761904762 | 0.04761904762 | 0             |  | inf          | #DIV/0! |
| IRF8    | 0.04761904762 | 0.04761904762 | 0             |  | inf          | #DIV/0! |
| IRGC    | 0.09523809524 | 0.09523809524 | 0.05555555556 |  | 1.473684211  | #DIV/0! |
| IRGQ    | 0.09523809524 | 0.09523809524 | 0.05555555556 |  | 1.473684211  | #DIV/0! |
| IRS1    | 0             | 0             | 0.05555555556 |  | 0            | #DIV/0! |
| IRX1    | 0             | 0             | 0.1111111111  |  | 0            | #DIV/0! |
| IRX2    | 0             | 0             | 0.1111111111  |  | 0            | #DIV/0! |
| IRX3    | 0.04761904762 | 0.04761904762 | 0             |  | inf          | #DIV/0! |
| IRX4    | 0             | 0             | 0.1111111111  |  | 0            | #DIV/0! |
| IRX5    | 0.04761904762 | 0.04761904762 | 0             |  | inf          | #DIV/0! |
| IRX6    | 0.04761904762 | 0.04761904762 | 0             |  | inf          | #DIV/0! |
| ISCA1   | 0             | 0             | 0.05555555556 |  | 0            | #DIV/0! |
| ISCU    | 0.04761904762 | 0.04761904762 | 0.05555555556 |  | 0.7          | #DIV/0! |
| ISG15   | 0             | 0             | 0.1111111111  |  | 0            | #DIV/0! |
| ISG20   | 0.04761904762 | 0.04761904762 | 0.05555555556 |  | 0.7          | #DIV/0! |
| SG20L2  | 0.1428571429  | 0.1428571429  | 0.1111111111  |  | 1.083333333  | #DIV/0! |
| ISL1    | 0.04761904762 | 0.04761904762 | 0.05555555556 |  | 0.7          | #DIV/0! |
| ISL2    | 0.04761904762 | 0.04761904762 | 0.05555555556 |  | 0.7          | #DIV/0! |
| ISLR    | 0.04761904762 | 0.04761904762 | 0.05555555556 |  | 0.7          | #DIV/0! |
| ISLR2   | 0.04761904762 | 0.04761904762 | 0.05555555556 |  | 0.7          | #DIV/0! |
| ISM1    | 0.1904761905  | 0.1904761905  | 0.1111111111  |  | 1.529411765  | #DIV/0! |
| SMI-AS  | 0.1904761905  | 0.1904761905  | 0.1111111111  |  | 1.529411765  | #DIV/0! |
| ISOC1   | 0.04761904762 | 0.04761904762 | 0             |  | inf          | #DIV/0! |
| ISOC2   | 0.09523809524 | 0.09523809524 | 0.05555555556 |  | 1.473684211  | #DIV/0! |
| IST1    | 0.04761904762 | 0.04761904762 | 0             |  | inf          | #DIV/0! |
| ISX     | 0             | 0             | 0.1666666667  |  | 0            | #DIV/0! |
| ISX-AS1 | 0             | 0             | 0.1666666667  |  | 0            | #DIV/0! |
| ISY1    | 0.09523809524 | 0.09523809524 | 0.05555555556 |  | 1.473684211  | #DIV/0! |



|         |               |               |               |  |              |         |
|---------|---------------|---------------|---------------|--|--------------|---------|
| Y1-RAB  | 0.09523809524 | 0.09523809524 | 0.05555555556 |  | 1.473684211  | #DIV/0! |
| ISYNA1  | 0.1428571429  | 0.1428571429  | 0.1111111111  |  | 1.083333333  | #DIV/0! |
| ITCH    | 0.09523809524 | 0.09523809524 | 0.1111111111  |  | 0.6842105263 | #DIV/0! |
| ITFG1   | 0.04761904762 | 0.04761904762 | 0             |  | inf          | #DIV/0! |
| FG1-AS  | 0.04761904762 | 0.04761904762 | 0             |  | inf          | #DIV/0! |
| ITFG2   | 0.04761904762 | 0.04761904762 | 0.1666666667  |  | 0.2          | #DIV/0! |
| FG2-AS  | 0.04761904762 | 0.04761904762 | 0.1666666667  |  | 0.2          | #DIV/0! |
| ITGA1   | 0.04761904762 | 0.04761904762 | 0.05555555556 |  | 0.7          | #DIV/0! |
| ITGA10  | 0.1428571429  | 0.1428571429  | 0.05555555556 |  | 2.333333333  | #DIV/0! |
| ITGA11  | 0.04761904762 | 0.04761904762 | 0.05555555556 |  | 0.7          | #DIV/0! |
| ITGA2   | 0.04761904762 | 0.04761904762 | 0.05555555556 |  | 0.7          | #DIV/0! |
| ITGA2B  | 0.09523809524 | 0.09523809524 | 0             |  | inf          | #DIV/0! |
| ITGA3   | 0.09523809524 | 0.09523809524 | 0             |  | inf          | #DIV/0! |
| ITGA4   | 0             | 0             | 0.05555555556 |  | 0            | #DIV/0! |
| ITGA5   | 0.04761904762 | 0.04761904762 | 0.05555555556 |  | 0.7          | #DIV/0! |
| ITGA6   | 0             | 0             | 0.1111111111  |  | 0            | #DIV/0! |
| GA6-AS  | 0             | 0             | 0.1111111111  |  | 0            | #DIV/0! |
| ITGA7   | 0.04761904762 | 0.04761904762 | 0.05555555556 |  | 0.7          | #DIV/0! |
| ITGA8   | 0.09523809524 | 0.09523809524 | 0.1111111111  |  | 0.6842105263 | #DIV/0! |
| ITGA9   | 0.04761904762 | 0.04761904762 | 0             |  | inf          | #DIV/0! |
| GA9-AS  | 0.04761904762 | 0.04761904762 | 0             |  | inf          | #DIV/0! |
| ITGAD   | 0.04761904762 | 0.04761904762 | 0             |  | inf          | #DIV/0! |
| ITGAE   | 0             | 0             | 0.1111111111  |  | 0            | #DIV/0! |
| ITGAL   | 0.04761904762 | 0.04761904762 | 0             |  | inf          | #DIV/0! |
| ITGAM   | 0.04761904762 | 0.04761904762 | 0             |  | inf          | #DIV/0! |
| ITGAV   | 0             | 0             | 0.05555555556 |  | 0            | #DIV/0! |
| ITGAX   | 0.04761904762 | 0.04761904762 | 0             |  | inf          | #DIV/0! |
| ITGB1   | 0.09523809524 | 0.09523809524 | 0.2222222222  |  | 0.2894736842 | #DIV/0! |
| TGB1BP  | 0             | 0             | 0.05555555556 |  | 0            | #DIV/0! |
| ITGB2   | 0.04761904762 | 0.04761904762 | 0.1111111111  |  | 0.325        | #DIV/0! |
| GB2-AS  | 0.04761904762 | 0.04761904762 | 0.1111111111  |  | 0.325        | #DIV/0! |
| ITGB3   | 0.1428571429  | 0.1428571429  | 0             |  | inf          | #DIV/0! |
| TGB3BP  | 0.04761904762 | 0.04761904762 | 0.05555555556 |  | 0.7          | #DIV/0! |
| ITGB4   | 0.04761904762 | 0.04761904762 | 0.05555555556 |  | 0.7          | #DIV/0! |
| ITGB5   | 0.04761904762 | 0.04761904762 | 0.05555555556 |  | 0.7          | #DIV/0! |
| ITGB6   | 0             | 0             | 0.05555555556 |  | 0            | #DIV/0! |
| ITGB7   | 0.04761904762 | 0.04761904762 | 0.05555555556 |  | 0.7          | #DIV/0! |
| ITGB8   | 0.04761904762 | 0.04761904762 | 0.2222222222  |  | 0.1375       | #DIV/0! |
| ITIH1   | 0.04761904762 | 0.04761904762 | 0             |  | inf          | #DIV/0! |
| ITIH2   | 0.09523809524 | 0.09523809524 | 0.1111111111  |  | 0.6842105263 | #DIV/0! |
| ITIH3   | 0.04761904762 | 0.04761904762 | 0             |  | inf          | #DIV/0! |
| ITIH4   | 0.04761904762 | 0.04761904762 | 0             |  | inf          | #DIV/0! |
| TIH4-AS | 0.04761904762 | 0.04761904762 | 0             |  | inf          | #DIV/0! |
| ITIH5   | 0.09523809524 | 0.09523809524 | 0.1111111111  |  | 0.6842105263 | #DIV/0! |
| ITK     | 0.04761904762 | 0.04761904762 | 0.05555555556 |  | 0.7          | #DIV/0! |
| ITLN1   | 0.1428571429  | 0.1428571429  | 0             |  | inf          | #DIV/0! |
| ITLN2   | 0.1428571429  | 0.1428571429  | 0             |  | inf          | #DIV/0! |
| ITM2C   | 0             | 0             | 0.05555555556 |  | 0            | #DIV/0! |
| ITPA    | 0.1904761905  | 0.1904761905  | 0.05555555556 |  | 3.294117647  | #DIV/0! |
| ITPKB   | 0.1428571429  | 0.1428571429  | 0             |  | inf          | #DIV/0! |
| PKB-IT  | 0.1428571429  | 0.1428571429  | 0             |  | inf          | #DIV/0! |

|          |               |               |               |  |              |         |
|----------|---------------|---------------|---------------|--|--------------|---------|
| ITPKC    | 0.04761904762 | 0.04761904762 | 0.05555555556 |  | 0.7          | #DIV/0! |
| ITPR1    | 0.04761904762 | 0.04761904762 | 0             |  | inf          | #DIV/0! |
| ITPR1-D  | 0.04761904762 | 0.04761904762 | 0             |  | inf          | #DIV/0! |
| ITPR2    | 0.04761904762 | 0.04761904762 | 0.05555555556 |  | 0.7          | #DIV/0! |
| ITPR3    | 0.04761904762 | 0.04761904762 | 0             |  | inf          | #DIV/0! |
| TPRID1   | 0.09523809524 | 0.09523809524 | 0.11111111111 |  | 0.6842105263 | #DIV/0! |
| TPRID2   | 0             | 0             | 0.05555555556 |  | 0            | #DIV/0! |
| ITPRIP   | 0.1428571429  | 0.1428571429  | 0.05555555556 |  | 2.333333333  | #DIV/0! |
| PRIP-A   | 0.1428571429  | 0.1428571429  | 0.05555555556 |  | 2.333333333  | #DIV/0! |
| TPRIPL   | 0             | 0             | 0.11111111111 |  | 0            | #DIV/0! |
| TPRIPL   | 0.04761904762 | 0.04761904762 | 0             |  | inf          | #DIV/0! |
| ITSN1    | 0.04761904762 | 0.04761904762 | 0.11111111111 |  | 0.325        | #DIV/0! |
| IVL      | 0.1904761905  | 0.1904761905  | 0             |  | inf          | #DIV/0! |
| VNSIAB   | 0.1428571429  | 0.1428571429  | 0.05555555556 |  | 2.333333333  | #DIV/0! |
| IWS1     | 0             | 0             | 0.05555555556 |  | 0            | #DIV/0! |
| ZUMO1    | 0.09523809524 | 0.09523809524 | 0.11111111111 |  | 0.6842105263 | #DIV/0! |
| ZUMO2    | 0.09523809524 | 0.09523809524 | 0.11111111111 |  | 0.6842105263 | #DIV/0! |
| ZUMO3    | 0.04761904762 | 0.04761904762 | 0.05555555556 |  | 0.7          | #DIV/0! |
| ZUMO4    | 0.09523809524 | 0.09523809524 | 0.11111111111 |  | 0.6842105263 | #DIV/0! |
| JADE1    | 0             | 0             | 0.05555555556 |  | 0            | #DIV/0! |
| JADE2    | 0.04761904762 | 0.04761904762 | 0             |  | inf          | #DIV/0! |
| JAG1     | 0.1904761905  | 0.1904761905  | 0.16666666667 |  | 0.9411764706 | #DIV/0! |
| JAGN1    | 0.09523809524 | 0.09523809524 | 0             |  | inf          | #DIV/0! |
| JAK1     | 0.04761904762 | 0.04761904762 | 0.05555555556 |  | 0.7          | #DIV/0! |
| JAK2     | 0.04761904762 | 0.04761904762 | 0.05555555556 |  | 0.7          | #DIV/0! |
| JAK3     | 0.1428571429  | 0.1428571429  | 0.11111111111 |  | 1.083333333  | #DIV/0! |
| AKMIP    | 0.2380952381  | 0.2380952381  | 0             |  | inf          | #DIV/0! |
| JAM2     | 0.04761904762 | 0.04761904762 | 0.11111111111 |  | 0.325        | #DIV/0! |
| JAZF1    | 0.04761904762 | 0.04761904762 | 0.22222222222 |  | 0.1375       | #DIV/0! |
| JAZF1-AS | 0.04761904762 | 0.04761904762 | 0.22222222222 |  | 0.1375       | #DIV/0! |
| JCAD     | 0.09523809524 | 0.09523809524 | 0.22222222222 |  | 0.2894736842 | #DIV/0! |
| JCHAIN   | 0.09523809524 | 0.09523809524 | 0.05555555556 |  | 1.473684211  | #DIV/0! |
| JMJD1C   | 0.09523809524 | 0.09523809524 | 0.11111111111 |  | 0.6842105263 | #DIV/0! |
| JD1C-A   | 0.09523809524 | 0.09523809524 | 0.11111111111 |  | 0.6842105263 | #DIV/0! |
| JMJD4    | 0.1428571429  | 0.1428571429  | 0             |  | inf          | #DIV/0! |
| JMJD6    | 0.04761904762 | 0.04761904762 | 0             |  | inf          | #DIV/0! |
| JMJD8    | 0.04761904762 | 0.04761904762 | 0.22222222222 |  | 0.1375       | #DIV/0! |
| JMY      | 0.04761904762 | 0.04761904762 | 0             |  | inf          | #DIV/0! |
| JOSD1    | 0.04761904762 | 0.04761904762 | 0.11111111111 |  | 0.325        | #DIV/0! |
| JOSD2    | 0.09523809524 | 0.09523809524 | 0.11111111111 |  | 0.6842105263 | #DIV/0! |
| JPH1     | 0.1904761905  | 0.1904761905  | 0.11111111111 |  | 1.529411765  | #DIV/0! |
| JPH2     | 0.1428571429  | 0.1428571429  | 0.16666666667 |  | 0.6666666667 | #DIV/0! |
| JPH3     | 0.04761904762 | 0.04761904762 | 0             |  | inf          | #DIV/0! |
| JPT1     | 0.04761904762 | 0.04761904762 | 0.05555555556 |  | 0.7          | #DIV/0! |
| JPT2     | 0.09523809524 | 0.09523809524 | 0.22222222222 |  | 0.2894736842 | #DIV/0! |
| JRK      | 0.04761904762 | 0.04761904762 | 0.16666666667 |  | 0.2          | #DIV/0! |
| JSRP1    | 0.09523809524 | 0.09523809524 | 0.11111111111 |  | 0.6842105263 | #DIV/0! |
| JTB      | 0.1904761905  | 0.1904761905  | 0.05555555556 |  | 3.294117647  | #DIV/0! |
| JUN      | 0.04761904762 | 0.04761904762 | 0.05555555556 |  | 0.7          | #DIV/0! |
| JUNB     | 0.1428571429  | 0.1428571429  | 0.11111111111 |  | 1.083333333  | #DIV/0! |
| JUND     | 0.1428571429  | 0.1428571429  | 0.11111111111 |  | 1.083333333  | #DIV/0! |

|         |               |               |               |  |              |         |
|---------|---------------|---------------|---------------|--|--------------|---------|
| JUP     | 0.09523809524 | 0.09523809524 | 0             |  | inf          | #DIV/0! |
| KALRN   | 0.04761904762 | 0.04761904762 | 0.05555555556 |  | 0.7          | #DIV/0! |
| KANK1   | 0.04761904762 | 0.04761904762 | 0.05555555556 |  | 0.7          | #DIV/0! |
| KANK2   | 0.1428571429  | 0.1428571429  | 0.1111111111  |  | 1.083333333  | #DIV/0! |
| KANK3   | 0.1428571429  | 0.1428571429  | 0.05555555556 |  | 2.333333333  | #DIV/0! |
| KANK4   | 0.04761904762 | 0.04761904762 | 0.05555555556 |  | 0.7          | #DIV/0! |
| KANSL1  | 0.1428571429  | 0.1428571429  | 0             |  | inf          | #DIV/0! |
| ANSL1-A | 0.1428571429  | 0.1428571429  | 0             |  | inf          | #DIV/0! |
| ANSL1   | 0             | 0             | 0.05555555556 |  | 0            | #DIV/0! |
| KANSL2  | 0.04761904762 | 0.04761904762 | 0.05555555556 |  | 0.7          | #DIV/0! |
| KANSL3  | 0             | 0             | 0.1111111111  |  | 0            | #DIV/0! |
| KARS    | 0.04761904762 | 0.04761904762 | 0             |  | inf          | #DIV/0! |
| KAT14   | 0.1904761905  | 0.1904761905  | 0.05555555556 |  | 3.294117647  | #DIV/0! |
| KAT2A   | 0.04761904762 | 0.04761904762 | 0             |  | inf          | #DIV/0! |
| KAT2B   | 0.04761904762 | 0.04761904762 | 0             |  | inf          | #DIV/0! |
| KAT6A   | 0.09523809524 | 0.09523809524 | 0.1666666667  |  | 0.4210526316 | #DIV/0! |
| KAT6B   | 0.1904761905  | 0.1904761905  | 0.05555555556 |  | 3.294117647  | #DIV/0! |
| KAT7    | 0.09523809524 | 0.09523809524 | 0             |  | inf          | #DIV/0! |
| KAT8    | 0.04761904762 | 0.04761904762 | 0             |  | inf          | #DIV/0! |
| KATNA1  | 0             | 0             | 0             |  |              | #DIV/0! |
| ATNAL   | 0.04761904762 | 0.04761904762 | 0.05555555556 |  | 0.7          | #DIV/0! |
| KATNB   | 0.04761904762 | 0.04761904762 | 0             |  | inf          | #DIV/0! |
| AZALD   | 0.1428571429  | 0.1428571429  | 0             |  | inf          | #DIV/0! |
| KAZN    | 0.04761904762 | 0.04761904762 | 0.1111111111  |  | 0.325        | #DIV/0! |
| AZN-AS  | 0.04761904762 | 0.04761904762 | 0.1111111111  |  | 0.325        | #DIV/0! |
| BTBD1   | 0.1428571429  | 0.1428571429  | 0.1111111111  |  | 1.083333333  | #DIV/0! |
| TBD11-C | 0.1428571429  | 0.1428571429  | 0.1111111111  |  | 1.083333333  | #DIV/0! |
| BTBD1   | 0.09523809524 | 0.09523809524 | 0.05555555556 |  | 1.473684211  | #DIV/0! |
| BTBD1   | 0.04761904762 | 0.04761904762 | 0.05555555556 |  | 0.7          | #DIV/0! |
| BTBD2   | 0.04761904762 | 0.04761904762 | 0.1666666667  |  | 0.2          | #DIV/0! |
| BTBD4   | 0             | 0             | 0.05555555556 |  | 0            | #DIV/0! |
| BTBD8   | 0.04761904762 | 0.04761904762 | 0             |  | inf          | #DIV/0! |
| KC6     | 0.04761904762 | 0.04761904762 | 0             |  | inf          | #DIV/0! |
| CCAT19  | 0.04761904762 | 0.04761904762 | 0.05555555556 |  | 0.7          | #DIV/0! |
| CCAT33  | 0.04761904762 | 0.04761904762 | 0.2222222222  |  | 0.1375       | #DIV/0! |
| KCMF1   | 0             | 0             | 0.05555555556 |  | 0            | #DIV/0! |
| KCNA1   | 0.04761904762 | 0.04761904762 | 0.1111111111  |  | 0.325        | #DIV/0! |
| KCNA10  | 0.04761904762 | 0.04761904762 | 0             |  | inf          | #DIV/0! |
| KCNA2   | 0.04761904762 | 0.04761904762 | 0             |  | inf          | #DIV/0! |
| KCNA3   | 0.04761904762 | 0.04761904762 | 0             |  | inf          | #DIV/0! |
| KCNA5   | 0.04761904762 | 0.04761904762 | 0.1111111111  |  | 0.325        | #DIV/0! |
| KCNA6   | 0.04761904762 | 0.04761904762 | 0.1111111111  |  | 0.325        | #DIV/0! |
| KCNA7   | 0.09523809524 | 0.09523809524 | 0.1111111111  |  | 0.6842105263 | #DIV/0! |
| KCNAB1  | 0.1428571429  | 0.1428571429  | 0.05555555556 |  | 2.333333333  | #DIV/0! |
| NAB1-A  | 0.1428571429  | 0.1428571429  | 0.05555555556 |  | 2.333333333  | #DIV/0! |
| NAB1-A  | 0.1428571429  | 0.1428571429  | 0.05555555556 |  | 2.333333333  | #DIV/0! |
| KCNAB2  | 0             | 0             | 0.05555555556 |  | 0            | #DIV/0! |
| KCNAB3  | 0             | 0             | 0.05555555556 |  | 0            | #DIV/0! |
| KCNB1   | 0.09523809524 | 0.09523809524 | 0.1666666667  |  | 0.4210526316 | #DIV/0! |
| KCNB2   | 0.1904761905  | 0.1904761905  | 0.1666666667  |  | 0.9411764706 | #DIV/0! |
| KCNC2   | 0.04761904762 | 0.04761904762 | 0.1111111111  |  | 0.325        | #DIV/0! |

|         |               |               |               |  |              |         |
|---------|---------------|---------------|---------------|--|--------------|---------|
| KCNC3   | 0.09523809524 | 0.09523809524 | 0.1111111111  |  | 0.6842105263 | #DIV/0! |
| KCNC4   | 0.04761904762 | 0.04761904762 | 0             |  | inf          | #DIV/0! |
| KCND2   | 0.04761904762 | 0.04761904762 | 0.05555555556 |  | 0.7          | #DIV/0! |
| KCND3   | 0.04761904762 | 0.04761904762 | 0             |  | inf          | #DIV/0! |
| CND3-A  | 0.04761904762 | 0.04761904762 | 0             |  | inf          | #DIV/0! |
| CND3-I  | 0.04761904762 | 0.04761904762 | 0             |  | inf          | #DIV/0! |
| KCNE1   | 0.04761904762 | 0.04761904762 | 0.1666666667  |  | 0.2          | #DIV/0! |
| KCNE1B  | 0.04761904762 | 0.04761904762 | 0.1111111111  |  | 0.325        | #DIV/0! |
| KCNE2   | 0.04761904762 | 0.04761904762 | 0.1111111111  |  | 0.325        | #DIV/0! |
| KCNE4   | 0             | 0             | 0.05555555556 |  | 0            | #DIV/0! |
| KCNF1   | 0             | 0             | 0.05555555556 |  | 0            | #DIV/0! |
| KCNG1   | 0.09523809524 | 0.09523809524 | 0.1666666667  |  | 0.4210526316 | #DIV/0! |
| KCNG2   | 0.04761904762 | 0.04761904762 | 0.05555555556 |  | 0.7          | #DIV/0! |
| KCNG3   | 0             | 0             | 0.05555555556 |  | 0            | #DIV/0! |
| KCNG4   | 0.04761904762 | 0.04761904762 | 0             |  | inf          | #DIV/0! |
| KCNH1   | 0.1428571429  | 0.1428571429  | 0             |  | inf          | #DIV/0! |
| CNH1-I  | 0.1428571429  | 0.1428571429  | 0             |  | inf          | #DIV/0! |
| KCNH2   | 0.09523809524 | 0.09523809524 | 0.05555555556 |  | 1.473684211  | #DIV/0! |
| KCNH3   | 0.04761904762 | 0.04761904762 | 0.05555555556 |  | 0.7          | #DIV/0! |
| KCNH4   | 0.04761904762 | 0.04761904762 | 0             |  | inf          | #DIV/0! |
| KCNH6   | 0.04761904762 | 0.04761904762 | 0             |  | inf          | #DIV/0! |
| KCNH7   | 0             | 0             | 0.05555555556 |  | 0            | #DIV/0! |
| KCNH8   | 0.04761904762 | 0.04761904762 | 0             |  | inf          | #DIV/0! |
| KCNIP1  | 0             | 0             | 0.05555555556 |  | 0            | #DIV/0! |
| KCNIP2  | 0.1428571429  | 0.1428571429  | 0             |  | inf          | #DIV/0! |
| CNIP2-A | 0.1428571429  | 0.1428571429  | 0             |  | inf          | #DIV/0! |
| KCNIP3  | 0             | 0             | 0.1111111111  |  | 0            | #DIV/0! |
| KCNJ10  | 0.1428571429  | 0.1428571429  | 0             |  | inf          | #DIV/0! |
| KCNJ12  | 0.09523809524 | 0.09523809524 | 0.05555555556 |  | 1.473684211  | #DIV/0! |
| KCNJ13  | 0             | 0             | 0.05555555556 |  | 0            | #DIV/0! |
| KCNJ14  | 0.09523809524 | 0.09523809524 | 0.1111111111  |  | 0.6842105263 | #DIV/0! |
| KCNJ15  | 0.04761904762 | 0.04761904762 | 0.1111111111  |  | 0.325        | #DIV/0! |
| KCNJ16  | 0             | 0             | 0             |  |              | #DIV/0! |
| KCNJ18  | 0.09523809524 | 0.09523809524 | 0.05555555556 |  | 1.473684211  | #DIV/0! |
| KCNJ2   | 0             | 0             | 0             |  |              | #DIV/0! |
| CNJ2-A  | 0             | 0             | 0             |  |              | #DIV/0! |
| KCNJ3   | 0             | 0             | 0.05555555556 |  | 0            | #DIV/0! |
| KCNJ4   | 0.04761904762 | 0.04761904762 | 0.1111111111  |  | 0.325        | #DIV/0! |
| KCNJ6   | 0.04761904762 | 0.04761904762 | 0.1111111111  |  | 0.325        | #DIV/0! |
| KCNJ8   | 0.04761904762 | 0.04761904762 | 0.05555555556 |  | 0.7          | #DIV/0! |
| KCNJ9   | 0.1428571429  | 0.1428571429  | 0             |  | inf          | #DIV/0! |
| KCNK1   | 0.1428571429  | 0.1428571429  | 0             |  | inf          | #DIV/0! |
| KCNK12  | 0             | 0             | 0.05555555556 |  | 0            | #DIV/0! |
| KCNK15  | 0.1428571429  | 0.1428571429  | 0.1666666667  |  | 0.6666666667 | #DIV/0! |
| CNK15-A | 0.1428571429  | 0.1428571429  | 0.1666666667  |  | 0.6666666667 | #DIV/0! |
| KCNK16  | 0.04761904762 | 0.04761904762 | 0.05555555556 |  | 0.7          | #DIV/0! |
| KCNK17  | 0.04761904762 | 0.04761904762 | 0.05555555556 |  | 0.7          | #DIV/0! |
| KCNK18  | 0.2380952381  | 0.2380952381  | 0             |  | inf          | #DIV/0! |
| KCNK2   | 0.1428571429  | 0.1428571429  | 0             |  | inf          | #DIV/0! |
| KCNK5   | 0.04761904762 | 0.04761904762 | 0.05555555556 |  | 0.7          | #DIV/0! |
| KCNK6   | 0.04761904762 | 0.04761904762 | 0.05555555556 |  | 0.7          | #DIV/0! |

|         |               |               |              |  |              |         |
|---------|---------------|---------------|--------------|--|--------------|---------|
| KCNK9   | 0.04761904762 | 0.04761904762 | 0.1111111111 |  | 0.325        | #DIV/0! |
| KCNMA   | 0.1428571429  | 0.1428571429  | 0.1111111111 |  | 1.083333333  | #DIV/0! |
| NMA1-A  | 0.1428571429  | 0.1428571429  | 0.1111111111 |  | 1.083333333  | #DIV/0! |
| NMA1-A  | 0.1428571429  | 0.1428571429  | 0.1111111111 |  | 1.083333333  | #DIV/0! |
| NMA1-A  | 0.1428571429  | 0.1428571429  | 0.1111111111 |  | 1.083333333  | #DIV/0! |
| KCNMB   | 0             | 0             | 0.0555555556 |  | 0            | #DIV/0! |
| KCNMB1  | 0.1904761905  | 0.1904761905  | 0.0555555556 |  | 3.294117647  | #DIV/0! |
| NMB2-A  | 0.1904761905  | 0.1904761905  | 0.0555555556 |  | 3.294117647  | #DIV/0! |
| KCNMB3  | 0.1904761905  | 0.1904761905  | 0.0555555556 |  | 3.294117647  | #DIV/0! |
| KCNMB4  | 0.09523809524 | 0.09523809524 | 0.1111111111 |  | 0.6842105263 | #DIV/0! |
| KCNN1   | 0.1428571429  | 0.1428571429  | 0.1111111111 |  | 1.083333333  | #DIV/0! |
| KCNN2   | 0.04761904762 | 0.04761904762 | 0            |  | inf          | #DIV/0! |
| KCNN3   | 0.1904761905  | 0.1904761905  | 0.1111111111 |  | 1.529411765  | #DIV/0! |
| KCNN4   | 0.09523809524 | 0.09523809524 | 0.0555555556 |  | 1.473684211  | #DIV/0! |
| KCNQ1   | 0.04761904762 | 0.04761904762 | 0            |  | inf          | #DIV/0! |
| CNQ1-A  | 0.04761904762 | 0.04761904762 | 0            |  | inf          | #DIV/0! |
| CNQ1D   | 0.04761904762 | 0.04761904762 | 0            |  | inf          | #DIV/0! |
| CNQ1O   | 0.04761904762 | 0.04761904762 | 0            |  | inf          | #DIV/0! |
| KCNQ2   | 0.1428571429  | 0.1428571429  | 0.2222222222 |  | 0.4583333333 | #DIV/0! |
| KCNQ3   | 0.04761904762 | 0.04761904762 | 0.1111111111 |  | 0.325        | #DIV/0! |
| KCNQ4   | 0.04761904762 | 0.04761904762 | 0.0555555556 |  | 0.7          | #DIV/0! |
| KCNQ5   | 0.04761904762 | 0.04761904762 | 0            |  | inf          | #DIV/0! |
| KCNS1   | 0.1428571429  | 0.1428571429  | 0.1666666667 |  | 0.6666666667 | #DIV/0! |
| KCNS2   | 0.1904761905  | 0.1904761905  | 0.1111111111 |  | 1.529411765  | #DIV/0! |
| KCNS3   | 0             | 0             | 0.0555555556 |  | 0            | #DIV/0! |
| KCNT1   | 0.04761904762 | 0.04761904762 | 0            |  | inf          | #DIV/0! |
| KCNT2   | 0.1428571429  | 0.1428571429  | 0            |  | inf          | #DIV/0! |
| KCNU1   | 0.04761904762 | 0.04761904762 | 0.1111111111 |  | 0.325        | #DIV/0! |
| KCNV1   | 0.1904761905  | 0.1904761905  | 0.1111111111 |  | 1.529411765  | #DIV/0! |
| KCNV2   | 0.04761904762 | 0.04761904762 | 0.0555555556 |  | 0.7          | #DIV/0! |
| KCP     | 0.04761904762 | 0.04761904762 | 0.0555555556 |  | 0.7          | #DIV/0! |
| KCTD1   | 0.09523809524 | 0.09523809524 | 0.0555555556 |  | 1.473684211  | #DIV/0! |
| KCTD10  | 0             | 0             | 0.0555555556 |  | 0            | #DIV/0! |
| KCTD11  | 0             | 0             | 0.0555555556 |  | 0            | #DIV/0! |
| KCTD12  | 0             | 0             | 0.0555555556 |  | 0            | #DIV/0! |
| KCTD13  | 0.04761904762 | 0.04761904762 | 0            |  | inf          | #DIV/0! |
| KCTD15  | 0.04761904762 | 0.04761904762 | 0.0555555556 |  | 0.7          | #DIV/0! |
| KCTD17  | 0             | 0             | 0.1111111111 |  | 0            | #DIV/0! |
| KCTD18  | 0             | 0             | 0.0555555556 |  | 0            | #DIV/0! |
| KCTD19  | 0.1428571429  | 0.1428571429  | 0.0555555556 |  | 2.333333333  | #DIV/0! |
| KCTD2   | 0.04761904762 | 0.04761904762 | 0.0555555556 |  | 0.7          | #DIV/0! |
| KCTD20  | 0.04761904762 | 0.04761904762 | 0.0555555556 |  | 0.7          | #DIV/0! |
| KCTD3   | 0.1428571429  | 0.1428571429  | 0            |  | inf          | #DIV/0! |
| KCTD5   | 0.04761904762 | 0.04761904762 | 0.1111111111 |  | 0.325        | #DIV/0! |
| KCTD6   | 0.04761904762 | 0.04761904762 | 0            |  | inf          | #DIV/0! |
| KCTD7   | 0.04761904762 | 0.04761904762 | 0.1111111111 |  | 0.325        | #DIV/0! |
| KCTD8   | 0.04761904762 | 0.04761904762 | 0            |  | inf          | #DIV/0! |
| KCTD9   | 0.04761904762 | 0.04761904762 | 0.1111111111 |  | 0.325        | #DIV/0! |
| KDELRI  | 0.09523809524 | 0.09523809524 | 0.1111111111 |  | 0.6842105263 | #DIV/0! |
| KDELRI3 | 0.04761904762 | 0.04761904762 | 0.1111111111 |  | 0.325        | #DIV/0! |
| KDF1    | 0.04761904762 | 0.04761904762 | 0.1111111111 |  | 0.325        | #DIV/0! |

|         |               |               |               |  |              |         |
|---------|---------------|---------------|---------------|--|--------------|---------|
| KDM1A   | 0.04761904762 | 0.04761904762 | 0.1111111111  |  | 0.325        | #DIV/0! |
| KDM2B   | 0.04761904762 | 0.04761904762 | 0.1111111111  |  | 0.325        | #DIV/0! |
| KDM3A   | 0             | 0             | 0.05555555556 |  | 0            | #DIV/0! |
| KDM3B   | 0.04761904762 | 0.04761904762 | 0             |  | inf          | #DIV/0! |
| KDM4A   | 0.04761904762 | 0.04761904762 | 0.05555555556 |  | 0.7          | #DIV/0! |
| DM4A-A  | 0.04761904762 | 0.04761904762 | 0.05555555556 |  | 0.7          | #DIV/0! |
| KDM4B   | 0.1428571429  | 0.1428571429  | 0.05555555556 |  | 2.333333333  | #DIV/0! |
| KDM4C   | 0.04761904762 | 0.04761904762 | 0.05555555556 |  | 0.7          | #DIV/0! |
| KDM5A   | 0.04761904762 | 0.04761904762 | 0.1111111111  |  | 0.325        | #DIV/0! |
| KDM5B   | 0.1428571429  | 0.1428571429  | 0             |  | inf          | #DIV/0! |
| KDM6B   | 0             | 0             | 0.05555555556 |  | 0            | #DIV/0! |
| KDM7A   | 0.04761904762 | 0.04761904762 | 0.05555555556 |  | 0.7          | #DIV/0! |
| DM7A-D  | 0.04761904762 | 0.04761904762 | 0.05555555556 |  | 0.7          | #DIV/0! |
| KDM8    | 0.04761904762 | 0.04761904762 | 0             |  | inf          | #DIV/0! |
| KDR     | 0.1904761905  | 0.1904761905  | 0.05555555556 |  | 3.294117647  | #DIV/0! |
| KDSR    | 0.09523809524 | 0.09523809524 | 0             |  | inf          | #DIV/0! |
| KEAP1   | 0.1428571429  | 0.1428571429  | 0.1111111111  |  | 1.083333333  | #DIV/0! |
| KEL     | 0.04761904762 | 0.04761904762 | 0.05555555556 |  | 0.7          | #DIV/0! |
| KERA    | 0.04761904762 | 0.04761904762 | 0.05555555556 |  | 0.7          | #DIV/0! |
| KHDC1   | 0.04761904762 | 0.04761904762 | 0             |  | inf          | #DIV/0! |
| KHDC11  | 0.04761904762 | 0.04761904762 | 0             |  | inf          | #DIV/0! |
| KHDC31  | 0.04761904762 | 0.04761904762 | 0             |  | inf          | #DIV/0! |
| KHDC4   | 0.1904761905  | 0.1904761905  | 0.1111111111  |  | 1.529411765  | #DIV/0! |
| HDRBS   | 0.04761904762 | 0.04761904762 | 0.1111111111  |  | 0.325        | #DIV/0! |
| HDRBS   | 0.04761904762 | 0.04761904762 | 0.2222222222  |  | 0.1375       | #DIV/0! |
| KHSRP   | 0.1428571429  | 0.1428571429  | 0.05555555556 |  | 2.333333333  | #DIV/0! |
| IAA004  | 0.1428571429  | 0.1428571429  | 0             |  | inf          | #DIV/0! |
| IAA008  | 0.04761904762 | 0.04761904762 | 0.2222222222  |  | 0.1375       | #DIV/0! |
| IAA010  | 0.04761904762 | 0.04761904762 | 0.05555555556 |  | 0.7          | #DIV/0! |
| IAA031  | 0             | 0             | 0.05555555556 |  | 0            | #DIV/0! |
| IAA0319 | 0.04761904762 | 0.04761904762 | 0.05555555556 |  | 0.7          | #DIV/0! |
| IAA035  | 0.04761904762 | 0.04761904762 | 0.05555555556 |  | 0.7          | #DIV/0! |
| IAA039  | 0.09523809524 | 0.09523809524 | 0             |  | inf          | #DIV/0! |
| IAA051  | 0.04761904762 | 0.04761904762 | 0             |  | inf          | #DIV/0! |
| IAA055  | 0.04761904762 | 0.04761904762 | 0             |  | inf          | #DIV/0! |
| IAA058  | 0.04761904762 | 0.04761904762 | 0             |  | inf          | #DIV/0! |
| IAA075  | 0             | 0             | 0.05555555556 |  | 0            | #DIV/0! |
| IAA075  | 0.04761904762 | 0.04761904762 | 0.05555555556 |  | 0.7          | #DIV/0! |
| IAA082  | 0.04761904762 | 0.04761904762 | 0             |  | inf          | #DIV/0! |
| IAA089  | 0.04761904762 | 0.04761904762 | 0.2222222222  |  | 0.1375       | #DIV/0! |
| IAA0895 | 0.1428571429  | 0.1428571429  | 0.05555555556 |  | 2.333333333  | #DIV/0! |
| IAA093  | 0             | 0             | 0.1111111111  |  | 0            | #DIV/0! |
| IAA110  | 0.04761904762 | 0.04761904762 | 0.05555555556 |  | 0.7          | #DIV/0! |
| IAA110  | 0             | 0             | 0.05555555556 |  | 0            | #DIV/0! |
| IAA114  | 0.04761904762 | 0.04761904762 | 0.1111111111  |  | 0.325        | #DIV/0! |
| IAA119  | 0.09523809524 | 0.09523809524 | 0.05555555556 |  | 1.473684211  | #DIV/0! |
| IAA121  | 0.1904761905  | 0.1904761905  | 0.05555555556 |  | 3.294117647  | #DIV/0! |
| IAA1211 | 0             | 0             | 0.05555555556 |  | 0            | #DIV/0! |
| IAA121  | 0.09523809524 | 0.09523809524 | 0.1111111111  |  | 0.6842105263 | #DIV/0! |
| IAA125  | 0.09523809524 | 0.09523809524 | 0.05555555556 |  | 1.473684211  | #DIV/0! |
| IAA132  | 0.04761904762 | 0.04761904762 | 0.05555555556 |  | 0.7          | #DIV/0! |

|         |               |               |               |  |               |         |
|---------|---------------|---------------|---------------|--|---------------|---------|
| IAA132A | 0.09523809524 | 0.09523809524 | 0.05555555556 |  | 1.473684211   | #DIV/0! |
| IAA132B | 0.04761904762 | 0.04761904762 | 0             |  | inf           | #DIV/0! |
| IAA152A | 0.04761904762 | 0.04761904762 | 0.11111111111 |  | 0.325         | #DIV/0! |
| IAA152B | 0.04761904762 | 0.04761904762 | 0.05555555556 |  | 0.7           | #DIV/0! |
| IAA158A | 0.04761904762 | 0.04761904762 | 0.05555555556 |  | 0.7           | #DIV/0! |
| IAA161A | 0.1428571429  | 0.1428571429  | 0             |  | inf           | #DIV/0! |
| IAA161B | 0.1428571429  | 0.1428571429  | 0             |  | inf           | #DIV/0! |
| IAA165A | 0.04761904762 | 0.04761904762 | 0.11111111111 |  | 0.325         | #DIV/0! |
| IAA165B | 0.04761904762 | 0.04761904762 | 0.05555555556 |  | 0.7           | #DIV/0! |
| IAA175A | 0.1428571429  | 0.1428571429  | 0.16666666667 |  | 0.66666666667 | #DIV/0! |
| IAA184A | 0.09523809524 | 0.09523809524 | 0.05555555556 |  | 1.473684211   | #DIV/0! |
| IAA195A | 0.04761904762 | 0.04761904762 | 0.05555555556 |  | 0.7           | #DIV/0! |
| IAA201A | 0.09523809524 | 0.09523809524 | 0.05555555556 |  | 1.473684211   | #DIV/0! |
| IAA201B | 0             | 0             | 0.05555555556 |  | 0             | #DIV/0! |
| IAA201C | 0.04761904762 | 0.04761904762 | 0.11111111111 |  | 0.325         | #DIV/0! |
| IAA202A | 0.04761904762 | 0.04761904762 | 0.05555555556 |  | 0.7           | #DIV/0! |
| IDINS22 | 0             | 0             | 0.05555555556 |  | 0             | #DIV/0! |
| KIF11   | 0.1428571429  | 0.1428571429  | 0.11111111111 |  | 1.083333333   | #DIV/0! |
| KIF12   | 0.04761904762 | 0.04761904762 | 0.05555555556 |  | 0.7           | #DIV/0! |
| KIF13B  | 0.04761904762 | 0.04761904762 | 0.11111111111 |  | 0.325         | #DIV/0! |
| KIF14   | 0.1428571429  | 0.1428571429  | 0             |  | inf           | #DIV/0! |
| KIF16B  | 0.1904761905  | 0.1904761905  | 0.11111111111 |  | 1.529411765   | #DIV/0! |
| KIF17   | 0.04761904762 | 0.04761904762 | 0.11111111111 |  | 0.325         | #DIV/0! |
| KIF18B  | 0.1428571429  | 0.1428571429  | 0             |  | inf           | #DIV/0! |
| KIF19   | 0.04761904762 | 0.04761904762 | 0             |  | inf           | #DIV/0! |
| KIF1A   | 0             | 0             | 0.05555555556 |  | 0             | #DIV/0! |
| KIF1B   | 0             | 0             | 0.11111111111 |  | 0             | #DIV/0! |
| KIF1BP  | 0.1904761905  | 0.1904761905  | 0.05555555556 |  | 3.294117647   | #DIV/0! |
| KIF1C   | 0             | 0             | 0.11111111111 |  | 0             | #DIV/0! |
| KIF20A  | 0.04761904762 | 0.04761904762 | 0             |  | inf           | #DIV/0! |
| KIF20B  | 0.1428571429  | 0.1428571429  | 0.11111111111 |  | 1.083333333   | #DIV/0! |
| KIF21A  | 0.04761904762 | 0.04761904762 | 0.05555555556 |  | 0.7           | #DIV/0! |
| KIF21B  | 0.1428571429  | 0.1428571429  | 0             |  | inf           | #DIV/0! |
| KIF22   | 0.04761904762 | 0.04761904762 | 0             |  | inf           | #DIV/0! |
| KIF23   | 0.04761904762 | 0.04761904762 | 0.05555555556 |  | 0.7           | #DIV/0! |
| KIF24   | 0.09523809524 | 0.09523809524 | 0.05555555556 |  | 1.473684211   | #DIV/0! |
| KIF26B  | 0.1428571429  | 0.1428571429  | 0.05555555556 |  | 2.333333333   | #DIV/0! |
| F26B-A  | 0.1428571429  | 0.1428571429  | 0.05555555556 |  | 2.333333333   | #DIV/0! |
| KIF27   | 0             | 0             | 0.05555555556 |  | 0             | #DIV/0! |
| KIF2A   | 0.04761904762 | 0.04761904762 | 0             |  | inf           | #DIV/0! |
| KIF2B   | 0.09523809524 | 0.09523809524 | 0             |  | inf           | #DIV/0! |
| KIF2C   | 0.04761904762 | 0.04761904762 | 0.05555555556 |  | 0.7           | #DIV/0! |
| KIF3A   | 0.04761904762 | 0.04761904762 | 0             |  | inf           | #DIV/0! |
| KIF3B   | 0.09523809524 | 0.09523809524 | 0.11111111111 |  | 0.6842105263  | #DIV/0! |
| KIF4B   | 0             | 0             | 0.05555555556 |  | 0             | #DIV/0! |
| KIF5A   | 0.1428571429  | 0.1428571429  | 0.05555555556 |  | 2.333333333   | #DIV/0! |
| KIF5B   | 0.09523809524 | 0.09523809524 | 0.22222222222 |  | 0.2894736842  | #DIV/0! |
| KIF5C   | 0             | 0             | 0.05555555556 |  | 0             | #DIV/0! |
| KIF6    | 0.04761904762 | 0.04761904762 | 0.05555555556 |  | 0.7           | #DIV/0! |
| KIF7    | 0.04761904762 | 0.04761904762 | 0.05555555556 |  | 0.7           | #DIV/0! |
| KIF9    | 0.09523809524 | 0.09523809524 | 0             |  | inf           | #DIV/0! |

|           |               |               |               |  |              |         |
|-----------|---------------|---------------|---------------|--|--------------|---------|
| KIF9-AS   | 0.09523809524 | 0.09523809524 | 0             |  | inf          | #DIV/0! |
| KIFAP3    | 0.1428571429  | 0.1428571429  | 0.05555555556 |  | 2.333333333  | #DIV/0! |
| KIFC1     | 0.04761904762 | 0.04761904762 | 0             |  | inf          | #DIV/0! |
| KIFC2     | 0.04761904762 | 0.04761904762 | 0.1666666667  |  | 0.2          | #DIV/0! |
| KIFC3     | 0.04761904762 | 0.04761904762 | 0             |  | inf          | #DIV/0! |
| KIN       | 0.09523809524 | 0.09523809524 | 0.1111111111  |  | 0.6842105263 | #DIV/0! |
| KIR2DL0   | 0.09523809524 | 0.09523809524 | 0.05555555556 |  | 1.473684211  | #DIV/0! |
| KIR2DL3   | 0.09523809524 | 0.09523809524 | 0.05555555556 |  | 1.473684211  | #DIV/0! |
| KIR2DL4   | 0.09523809524 | 0.09523809524 | 0.05555555556 |  | 1.473684211  | #DIV/0! |
| KIR2DS4   | 0.09523809524 | 0.09523809524 | 0.05555555556 |  | 1.473684211  | #DIV/0! |
| KIR3DL0   | 0.09523809524 | 0.09523809524 | 0.05555555556 |  | 1.473684211  | #DIV/0! |
| KIR3DL1   | 0.09523809524 | 0.09523809524 | 0.05555555556 |  | 1.473684211  | #DIV/0! |
| KIR3DL3   | 0.09523809524 | 0.09523809524 | 0.05555555556 |  | 1.473684211  | #DIV/0! |
| KIR3DX    | 0.09523809524 | 0.09523809524 | 0.05555555556 |  | 1.473684211  | #DIV/0! |
| KIRREL    | 0.1428571429  | 0.1428571429  | 0.05555555556 |  | 2.333333333  | #DIV/0! |
| KIRREL1-1 | 0.1428571429  | 0.1428571429  | 0.05555555556 |  | 2.333333333  | #DIV/0! |
| KIRREL2   | 0.04761904762 | 0.04761904762 | 0.05555555556 |  | 0.7          | #DIV/0! |
| KISS1     | 0.2380952381  | 0.2380952381  | 0             |  | inf          | #DIV/0! |
| KISS1R    | 0.09523809524 | 0.09523809524 | 0.1111111111  |  | 0.6842105263 | #DIV/0! |
| KIT       | 0.1904761905  | 0.1904761905  | 0.05555555556 |  | 3.294117647  | #DIV/0! |
| KITLG     | 0.04761904762 | 0.04761904762 | 0.05555555556 |  | 0.7          | #DIV/0! |
| KIZ       | 0.1904761905  | 0.1904761905  | 0.05555555556 |  | 3.294117647  | #DIV/0! |
| KIZ-AS1   | 0.1904761905  | 0.1904761905  | 0.05555555556 |  | 3.294117647  | #DIV/0! |
| KLB       | 0.1904761905  | 0.1904761905  | 0.05555555556 |  | 3.294117647  | #DIV/0! |
| KLC3      | 0.09523809524 | 0.09523809524 | 0.1111111111  |  | 0.6842105263 | #DIV/0! |
| KLC4      | 0.04761904762 | 0.04761904762 | 0.05555555556 |  | 0.7          | #DIV/0! |
| KLF1      | 0.1428571429  | 0.1428571429  | 0.1111111111  |  | 1.083333333  | #DIV/0! |
| KLF10     | 0.1904761905  | 0.1904761905  | 0.1111111111  |  | 1.529411765  | #DIV/0! |
| KLF11     | 0             | 0             | 0.05555555556 |  | 0            | #DIV/0! |
| KLF14     | 0.04761904762 | 0.04761904762 | 0.05555555556 |  | 0.7          | #DIV/0! |
| KLF15     | 0.04761904762 | 0.04761904762 | 0.05555555556 |  | 0.7          | #DIV/0! |
| KLF16     | 0.09523809524 | 0.09523809524 | 0.1111111111  |  | 0.6842105263 | #DIV/0! |
| KLF17     | 0.04761904762 | 0.04761904762 | 0.05555555556 |  | 0.7          | #DIV/0! |
| KLF18     | 0.04761904762 | 0.04761904762 | 0.05555555556 |  | 0.7          | #DIV/0! |
| KLF2      | 0.1428571429  | 0.1428571429  | 0.1111111111  |  | 1.083333333  | #DIV/0! |
| KLF3      | 0.04761904762 | 0.04761904762 | 0             |  | inf          | #DIV/0! |
| KLF3-AS1  | 0.04761904762 | 0.04761904762 | 0             |  | inf          | #DIV/0! |
| KLF4      | 0.04761904762 | 0.04761904762 | 0.05555555556 |  | 0.7          | #DIV/0! |
| KLF6      | 0.04761904762 | 0.04761904762 | 0.1666666667  |  | 0.2          | #DIV/0! |
| KLF7      | 0             | 0             | 0.05555555556 |  | 0            | #DIV/0! |
| KLF9      | 0             | 0             | 0.05555555556 |  | 0            | #DIV/0! |
| KLHDC1    | 0.04761904762 | 0.04761904762 | 0             |  | inf          | #DIV/0! |
| KLHDC10   | 0.04761904762 | 0.04761904762 | 0.05555555556 |  | 0.7          | #DIV/0! |
| KLHDC2    | 0.04761904762 | 0.04761904762 | 0             |  | inf          | #DIV/0! |
| KLHDC3    | 0.04761904762 | 0.04761904762 | 0.05555555556 |  | 0.7          | #DIV/0! |
| KLHDC4    | 0.04761904762 | 0.04761904762 | 0             |  | inf          | #DIV/0! |
| KLHDC7    | 0.04761904762 | 0.04761904762 | 0.05555555556 |  | 0.7          | #DIV/0! |
| KLHDC7    | 0             | 0             | 0.1111111111  |  | 0            | #DIV/0! |
| KLHDC8    | 0.1904761905  | 0.1904761905  | 0             |  | inf          | #DIV/0! |
| KLHDC8    | 0.09523809524 | 0.09523809524 | 0             |  | inf          | #DIV/0! |
| KLHDC9    | 0.1428571429  | 0.1428571429  | 0             |  | inf          | #DIV/0! |



|        |               |               |               |  |              |         |
|--------|---------------|---------------|---------------|--|--------------|---------|
| KLHL10 | 0.09523809524 | 0.09523809524 | 0             |  | inf          | #DIV/0! |
| KLHL11 | 0.09523809524 | 0.09523809524 | 0             |  | inf          | #DIV/0! |
| KLHL12 | 0.1428571429  | 0.1428571429  | 0             |  | inf          | #DIV/0! |
| KLHL14 | 0.09523809524 | 0.09523809524 | 0             |  | inf          | #DIV/0! |
| KLHL17 | 0             | 0             | 0.1111111111  |  | 0            | #DIV/0! |
| KLHL18 | 0.09523809524 | 0.09523809524 | 0             |  | inf          | #DIV/0! |
| KLHL2  | 0             | 0             | 0.1111111111  |  | 0            | #DIV/0! |
| KLHL20 | 0.1428571429  | 0.1428571429  | 0             |  | inf          | #DIV/0! |
| KLHL21 | 0             | 0             | 0.05555555556 |  | 0            | #DIV/0! |
| KLHL22 | 0.04761904762 | 0.04761904762 | 0.05555555556 |  | 0.7          | #DIV/0! |
| KLHL23 | 0             | 0             | 0.05555555556 |  | 0            | #DIV/0! |
| KLHL24 | 0.1904761905  | 0.1904761905  | 0.05555555556 |  | 3.294117647  | #DIV/0! |
| KLHL25 | 0.09523809524 | 0.09523809524 | 0.05555555556 |  | 1.473684211  | #DIV/0! |
| KLHL26 | 0.1428571429  | 0.1428571429  | 0.1111111111  |  | 1.083333333  | #DIV/0! |
| KLHL28 | 0.04761904762 | 0.04761904762 | 0             |  | inf          | #DIV/0! |
| KLHL29 | 0             | 0             | 0.05555555556 |  | 0            | #DIV/0! |
| KLHL3  | 0             | 0             | 0             |  |              | #DIV/0! |
| KLHL30 | 0             | 0             | 0.05555555556 |  | 0            | #DIV/0! |
| KLHL31 | 0.04761904762 | 0.04761904762 | 0             |  | inf          | #DIV/0! |
| KLHL33 | 0.04761904762 | 0.04761904762 | 0             |  | inf          | #DIV/0! |
| KLHL36 | 0.04761904762 | 0.04761904762 | 0             |  | inf          | #DIV/0! |
| KLHL38 | 0.1428571429  | 0.1428571429  | 0.1111111111  |  | 1.083333333  | #DIV/0! |
| KLHL40 | 0.04761904762 | 0.04761904762 | 0             |  | inf          | #DIV/0! |
| KLHL41 | 0             | 0             | 0.05555555556 |  | 0            | #DIV/0! |
| KLHL42 | 0.04761904762 | 0.04761904762 | 0.05555555556 |  | 0.7          | #DIV/0! |
| KLHL5  | 0.1904761905  | 0.1904761905  | 0.05555555556 |  | 3.294117647  | #DIV/0! |
| KLHL6  | 0.1904761905  | 0.1904761905  | 0.05555555556 |  | 3.294117647  | #DIV/0! |
| LHL6-A | 0.1904761905  | 0.1904761905  | 0.05555555556 |  | 3.294117647  | #DIV/0! |
| KLHL7  | 0.04761904762 | 0.04761904762 | 0.1666666667  |  | 0.2          | #DIV/0! |
| LHL7-D | 0.04761904762 | 0.04761904762 | 0.1666666667  |  | 0.2          | #DIV/0! |
| KLHL8  | 0             | 0             | 0.05555555556 |  | 0            | #DIV/0! |
| KLHL9  | 0.09523809524 | 0.09523809524 | 0.1111111111  |  | 0.6842105263 | #DIV/0! |
| KLK1   | 0.09523809524 | 0.09523809524 | 0.05555555556 |  | 1.473684211  | #DIV/0! |
| KLK10  | 0.09523809524 | 0.09523809524 | 0.05555555556 |  | 1.473684211  | #DIV/0! |
| KLK11  | 0.09523809524 | 0.09523809524 | 0.05555555556 |  | 1.473684211  | #DIV/0! |
| KLK12  | 0.09523809524 | 0.09523809524 | 0.05555555556 |  | 1.473684211  | #DIV/0! |
| KLK13  | 0.09523809524 | 0.09523809524 | 0.05555555556 |  | 1.473684211  | #DIV/0! |
| KLK14  | 0.09523809524 | 0.09523809524 | 0.05555555556 |  | 1.473684211  | #DIV/0! |
| KLK15  | 0.09523809524 | 0.09523809524 | 0.05555555556 |  | 1.473684211  | #DIV/0! |
| KLK2   | 0.09523809524 | 0.09523809524 | 0.05555555556 |  | 1.473684211  | #DIV/0! |
| KLK3   | 0.09523809524 | 0.09523809524 | 0.05555555556 |  | 1.473684211  | #DIV/0! |
| KLK4   | 0.09523809524 | 0.09523809524 | 0.05555555556 |  | 1.473684211  | #DIV/0! |
| KLK5   | 0.09523809524 | 0.09523809524 | 0.05555555556 |  | 1.473684211  | #DIV/0! |
| KLK6   | 0.09523809524 | 0.09523809524 | 0.05555555556 |  | 1.473684211  | #DIV/0! |
| KLK7   | 0.09523809524 | 0.09523809524 | 0.05555555556 |  | 1.473684211  | #DIV/0! |
| KLK8   | 0.09523809524 | 0.09523809524 | 0.05555555556 |  | 1.473684211  | #DIV/0! |
| KLK9   | 0.09523809524 | 0.09523809524 | 0.05555555556 |  | 1.473684211  | #DIV/0! |
| KLKB1  | 0             | 0             | 0.05555555556 |  | 0            | #DIV/0! |
| KLKP1  | 0.09523809524 | 0.09523809524 | 0.05555555556 |  | 1.473684211  | #DIV/0! |
| KLLN   | 0.1428571429  | 0.1428571429  | 0.1666666667  |  | 0.6666666667 | #DIV/0! |
| KLRA1P | 0.04761904762 | 0.04761904762 | 0.1111111111  |  | 0.325        | #DIV/0! |

|        |               |               |               |  |              |         |
|--------|---------------|---------------|---------------|--|--------------|---------|
| KLRB1  | 0.04761904762 | 0.04761904762 | 0.1111111111  |  | 0.325        | #DIV/0! |
| KLRC1  | 0.04761904762 | 0.04761904762 | 0.1111111111  |  | 0.325        | #DIV/0! |
| KLRC2  | 0.04761904762 | 0.04761904762 | 0.1111111111  |  | 0.325        | #DIV/0! |
| KLRC3  | 0.04761904762 | 0.04761904762 | 0.1111111111  |  | 0.325        | #DIV/0! |
| KLRC4  | 0.04761904762 | 0.04761904762 | 0.1111111111  |  | 0.325        | #DIV/0! |
| RC4-KL | 0.04761904762 | 0.04761904762 | 0.1111111111  |  | 0.325        | #DIV/0! |
| KLRD1  | 0.04761904762 | 0.04761904762 | 0.1111111111  |  | 0.325        | #DIV/0! |
| KLRF1  | 0.04761904762 | 0.04761904762 | 0.1111111111  |  | 0.325        | #DIV/0! |
| KLRF2  | 0.04761904762 | 0.04761904762 | 0.1111111111  |  | 0.325        | #DIV/0! |
| KLRG1  | 0.04761904762 | 0.04761904762 | 0.1111111111  |  | 0.325        | #DIV/0! |
| KLRG2  | 0.04761904762 | 0.04761904762 | 0.05555555556 |  | 0.7          | #DIV/0! |
| KLRK1  | 0.04761904762 | 0.04761904762 | 0.1111111111  |  | 0.325        | #DIV/0! |
| KMO    | 0.1428571429  | 0.1428571429  | 0             |  | inf          | #DIV/0! |
| KMT2B  | 0.04761904762 | 0.04761904762 | 0.05555555556 |  | 0.7          | #DIV/0! |
| KMT2C  | 0.09523809524 | 0.09523809524 | 0.05555555556 |  | 1.473684211  | #DIV/0! |
| KMT2D  | 0.04761904762 | 0.04761904762 | 0.05555555556 |  | 0.7          | #DIV/0! |
| KMT2E  | 0.04761904762 | 0.04761904762 | 0.05555555556 |  | 0.7          | #DIV/0! |
| MT2E-A | 0.04761904762 | 0.04761904762 | 0.05555555556 |  | 0.7          | #DIV/0! |
| KMT5A  | 0.04761904762 | 0.04761904762 | 0.1111111111  |  | 0.325        | #DIV/0! |
| KMT5C  | 0.09523809524 | 0.09523809524 | 0.05555555556 |  | 1.473684211  | #DIV/0! |
| KNCN   | 0.04761904762 | 0.04761904762 | 0.05555555556 |  | 0.7          | #DIV/0! |
| KNDC1  | 0.1904761905  | 0.1904761905  | 0             |  | inf          | #DIV/0! |
| KNG1   | 0.09523809524 | 0.09523809524 | 0.05555555556 |  | 1.473684211  | #DIV/0! |
| KNOPI  | 0.04761904762 | 0.04761904762 | 0             |  | inf          | #DIV/0! |
| KNTC1  | 0.04761904762 | 0.04761904762 | 0.1111111111  |  | 0.325        | #DIV/0! |
| KPNA1  | 0.09523809524 | 0.09523809524 | 0.05555555556 |  | 1.473684211  | #DIV/0! |
| KPNA2  | 0             | 0             | 0             |  |              | #DIV/0! |
| KPNA4  | 0.1428571429  | 0.1428571429  | 0.05555555556 |  | 2.333333333  | #DIV/0! |
| KPNA6  | 0.04761904762 | 0.04761904762 | 0.1111111111  |  | 0.325        | #DIV/0! |
| KPNA7  | 0.04761904762 | 0.04761904762 | 0.05555555556 |  | 0.7          | #DIV/0! |
| KPNB1  | 0.1428571429  | 0.1428571429  | 0             |  | inf          | #DIV/0! |
| KPRP   | 0.1904761905  | 0.1904761905  | 0             |  | inf          | #DIV/0! |
| KPTN   | 0.09523809524 | 0.09523809524 | 0.1111111111  |  | 0.6842105263 | #DIV/0! |
| KRAS   | 0.04761904762 | 0.04761904762 | 0.05555555556 |  | 0.7          | #DIV/0! |
| KRBA1  | 0.09523809524 | 0.09523809524 | 0.05555555556 |  | 1.473684211  | #DIV/0! |
| KRBA2  | 0.04761904762 | 0.04761904762 | 0.05555555556 |  | 0.7          | #DIV/0! |
| KRBOX1 | 0.04761904762 | 0.04761904762 | 0             |  | inf          | #DIV/0! |
| BOX1-A | 0.04761904762 | 0.04761904762 | 0             |  | inf          | #DIV/0! |
| KRCC1  | 0             | 0             | 0.05555555556 |  | 0            | #DIV/0! |
| REMEN  | 0.04761904762 | 0.04761904762 | 0.1111111111  |  | 0.325        | #DIV/0! |
| REMEN  | 0.04761904762 | 0.04761904762 | 0.1111111111  |  | 0.325        | #DIV/0! |
| KRI1   | 0.1428571429  | 0.1428571429  | 0.1111111111  |  | 1.083333333  | #DIV/0! |
| KRIT1  | 0.04761904762 | 0.04761904762 | 0.1111111111  |  | 0.325        | #DIV/0! |
| KRT1   | 0.04761904762 | 0.04761904762 | 0.05555555556 |  | 0.7          | #DIV/0! |
| KRT10  | 0.09523809524 | 0.09523809524 | 0             |  | inf          | #DIV/0! |
| KRT12  | 0.09523809524 | 0.09523809524 | 0             |  | inf          | #DIV/0! |
| KRT13  | 0.09523809524 | 0.09523809524 | 0             |  | inf          | #DIV/0! |
| KRT14  | 0.09523809524 | 0.09523809524 | 0             |  | inf          | #DIV/0! |
| KRT15  | 0.09523809524 | 0.09523809524 | 0             |  | inf          | #DIV/0! |
| KRT16  | 0.09523809524 | 0.09523809524 | 0             |  | inf          | #DIV/0! |
| KRT16P | 0.04761904762 | 0.04761904762 | 0.1111111111  |  | 0.325        | #DIV/0! |

|         |               |               |               |  |             |         |
|---------|---------------|---------------|---------------|--|-------------|---------|
| KRT16P  | 0.04761904762 | 0.04761904762 | 0.05555555556 |  | 0.7         | #DIV/0! |
| KRT16P  | 0.09523809524 | 0.09523809524 | 0.05555555556 |  | 1.473684211 | #DIV/0! |
| KRT17   | 0.09523809524 | 0.09523809524 | 0             |  | inf         | #DIV/0! |
| KRT17P  | 0.04761904762 | 0.04761904762 | 0.05555555556 |  | 0.7         | #DIV/0! |
| KRT17P  | 0.04761904762 | 0.04761904762 | 0.1111111111  |  | 0.325       | #DIV/0! |
| KRT17P  | 0.04761904762 | 0.04761904762 | 0.1111111111  |  | 0.325       | #DIV/0! |
| KRT18   | 0.04761904762 | 0.04761904762 | 0.05555555556 |  | 0.7         | #DIV/0! |
| RT18P5  | 0.04761904762 | 0.04761904762 | 0.05555555556 |  | 0.7         | #DIV/0! |
| KRT19   | 0.09523809524 | 0.09523809524 | 0             |  | inf         | #DIV/0! |
| KRT19P  | 0.04761904762 | 0.04761904762 | 0.05555555556 |  | 0.7         | #DIV/0! |
| KRT2    | 0.04761904762 | 0.04761904762 | 0.05555555556 |  | 0.7         | #DIV/0! |
| KRT20   | 0.09523809524 | 0.09523809524 | 0             |  | inf         | #DIV/0! |
| KRT22   | 0.09523809524 | 0.09523809524 | 0             |  | inf         | #DIV/0! |
| KRT23   | 0.09523809524 | 0.09523809524 | 0             |  | inf         | #DIV/0! |
| KRT24   | 0.09523809524 | 0.09523809524 | 0             |  | inf         | #DIV/0! |
| KRT25   | 0.09523809524 | 0.09523809524 | 0             |  | inf         | #DIV/0! |
| KRT26   | 0.09523809524 | 0.09523809524 | 0             |  | inf         | #DIV/0! |
| KRT27   | 0.09523809524 | 0.09523809524 | 0             |  | inf         | #DIV/0! |
| KRT28   | 0.09523809524 | 0.09523809524 | 0             |  | inf         | #DIV/0! |
| KRT3    | 0.04761904762 | 0.04761904762 | 0.05555555556 |  | 0.7         | #DIV/0! |
| KRT31   | 0.09523809524 | 0.09523809524 | 0             |  | inf         | #DIV/0! |
| KRT32   | 0.09523809524 | 0.09523809524 | 0             |  | inf         | #DIV/0! |
| KRT33A  | 0.09523809524 | 0.09523809524 | 0             |  | inf         | #DIV/0! |
| KRT33B  | 0.09523809524 | 0.09523809524 | 0             |  | inf         | #DIV/0! |
| KRT34   | 0.09523809524 | 0.09523809524 | 0             |  | inf         | #DIV/0! |
| KRT35   | 0.09523809524 | 0.09523809524 | 0             |  | inf         | #DIV/0! |
| KRT36   | 0.09523809524 | 0.09523809524 | 0             |  | inf         | #DIV/0! |
| KRT37   | 0.09523809524 | 0.09523809524 | 0             |  | inf         | #DIV/0! |
| KRT38   | 0.09523809524 | 0.09523809524 | 0             |  | inf         | #DIV/0! |
| KRT39   | 0.09523809524 | 0.09523809524 | 0             |  | inf         | #DIV/0! |
| KRT4    | 0.04761904762 | 0.04761904762 | 0.05555555556 |  | 0.7         | #DIV/0! |
| KRT40   | 0.09523809524 | 0.09523809524 | 0             |  | inf         | #DIV/0! |
| KRT42P  | 0.09523809524 | 0.09523809524 | 0             |  | inf         | #DIV/0! |
| KRT5    | 0.04761904762 | 0.04761904762 | 0.05555555556 |  | 0.7         | #DIV/0! |
| KRT6A   | 0.04761904762 | 0.04761904762 | 0.05555555556 |  | 0.7         | #DIV/0! |
| KRT6B   | 0.04761904762 | 0.04761904762 | 0.05555555556 |  | 0.7         | #DIV/0! |
| KRT6C   | 0.04761904762 | 0.04761904762 | 0.05555555556 |  | 0.7         | #DIV/0! |
| KRT7    | 0.04761904762 | 0.04761904762 | 0.05555555556 |  | 0.7         | #DIV/0! |
| KRT7-A5 | 0.04761904762 | 0.04761904762 | 0.05555555556 |  | 0.7         | #DIV/0! |
| KRT71   | 0.04761904762 | 0.04761904762 | 0.05555555556 |  | 0.7         | #DIV/0! |
| KRT72   | 0.04761904762 | 0.04761904762 | 0.05555555556 |  | 0.7         | #DIV/0! |
| KRT73   | 0.04761904762 | 0.04761904762 | 0.05555555556 |  | 0.7         | #DIV/0! |
| RT73-A5 | 0.04761904762 | 0.04761904762 | 0.05555555556 |  | 0.7         | #DIV/0! |
| KRT74   | 0.04761904762 | 0.04761904762 | 0.05555555556 |  | 0.7         | #DIV/0! |
| KRT75   | 0.04761904762 | 0.04761904762 | 0.05555555556 |  | 0.7         | #DIV/0! |
| KRT76   | 0.04761904762 | 0.04761904762 | 0.05555555556 |  | 0.7         | #DIV/0! |
| KRT77   | 0.04761904762 | 0.04761904762 | 0.05555555556 |  | 0.7         | #DIV/0! |
| KRT78   | 0.04761904762 | 0.04761904762 | 0.05555555556 |  | 0.7         | #DIV/0! |
| KRT79   | 0.04761904762 | 0.04761904762 | 0.05555555556 |  | 0.7         | #DIV/0! |
| KRT8    | 0.04761904762 | 0.04761904762 | 0.05555555556 |  | 0.7         | #DIV/0! |
| KRT80   | 0.04761904762 | 0.04761904762 | 0.05555555556 |  | 0.7         | #DIV/0! |





|               |               |               |              |  |              |         |
|---------------|---------------|---------------|--------------|--|--------------|---------|
| <b>KTN1</b>   | 0.04761904762 | 0.04761904762 | 0            |  | inf          | #DIV/0! |
| <b>TN1-AS</b> | 0.04761904762 | 0.04761904762 | 0            |  | inf          | #DIV/0! |
| <b>KXD1</b>   | 0.1428571429  | 0.1428571429  | 0.1111111111 |  | 1.083333333  | #DIV/0! |
| <b>KY</b>     | 0.1428571429  | 0.1428571429  | 0.0555555556 |  | 2.333333333  | #DIV/0! |
| <b>KYAT1</b>  | 0.09523809524 | 0.09523809524 | 0.0555555556 |  | 1.473684211  | #DIV/0! |
| <b>KYAT3</b>  | 0.04761904762 | 0.04761904762 | 0.0555555556 |  | 0.7          | #DIV/0! |
| <b>KYNU</b>   | 0             | 0             | 0.0555555556 |  | 0            | #DIV/0! |
| <b>L1TD1</b>  | 0.04761904762 | 0.04761904762 | 0.0555555556 |  | 0.7          | #DIV/0! |
| <b>L2HGDI</b> | 0.04761904762 | 0.04761904762 | 0            |  | inf          | #DIV/0! |
| <b>3MBTL</b>  | 0.1428571429  | 0.1428571429  | 0.1111111111 |  | 1.083333333  | #DIV/0! |
| <b>3MBTL</b>  | 0             | 0             | 0.1111111111 |  | 0            | #DIV/0! |
| <b>3MBTL</b>  | 0.09523809524 | 0.09523809524 | 0            |  | inf          | #DIV/0! |
| <b>IBTL4</b>  | 0.09523809524 | 0.09523809524 | 0            |  | inf          | #DIV/0! |
| <b>LACTB</b>  | 0.04761904762 | 0.04761904762 | 0.0555555556 |  | 0.7          | #DIV/0! |
| <b>LACTB2</b> | 0.1904761905  | 0.1904761905  | 0.1666666667 |  | 0.9411764706 | #DIV/0! |
| <b>CTB2-A</b> | 0.1904761905  | 0.1904761905  | 0.1666666667 |  | 0.9411764706 | #DIV/0! |
| <b>ACTBL</b>  | 0.04761904762 | 0.04761904762 | 0.1111111111 |  | 0.325        | #DIV/0! |
| <b>LAD1</b>   | 0.1428571429  | 0.1428571429  | 0            |  | inf          | #DIV/0! |
| <b>LAG3</b>   | 0.04761904762 | 0.04761904762 | 0.1111111111 |  | 0.325        | #DIV/0! |
| <b>LAIR1</b>  | 0.09523809524 | 0.09523809524 | 0.0555555556 |  | 1.473684211  | #DIV/0! |
| <b>LAIR2</b>  | 0.09523809524 | 0.09523809524 | 0.0555555556 |  | 1.473684211  | #DIV/0! |
| <b>LALBA</b>  | 0.04761904762 | 0.04761904762 | 0.0555555556 |  | 0.7          | #DIV/0! |
| <b>LAMA1</b>  | 0.09523809524 | 0.09523809524 | 0            |  | inf          | #DIV/0! |
| <b>LAMA3</b>  | 0.09523809524 | 0.09523809524 | 0.0555555556 |  | 1.473684211  | #DIV/0! |
| <b>LAMA5</b>  | 0.1428571429  | 0.1428571429  | 0.2222222222 |  | 0.4583333333 | #DIV/0! |
| <b>MA5-A</b>  | 0.1428571429  | 0.1428571429  | 0.2222222222 |  | 0.4583333333 | #DIV/0! |
| <b>LAMB1</b>  | 0.04761904762 | 0.04761904762 | 0.0555555556 |  | 0.7          | #DIV/0! |
| <b>LAMB2</b>  | 0.09523809524 | 0.09523809524 | 0            |  | inf          | #DIV/0! |
| <b>AMB2P</b>  | 0.09523809524 | 0.09523809524 | 0            |  | inf          | #DIV/0! |
| <b>LAMB3</b>  | 0.1428571429  | 0.1428571429  | 0            |  | inf          | #DIV/0! |
| <b>LAMB4</b>  | 0.04761904762 | 0.04761904762 | 0.0555555556 |  | 0.7          | #DIV/0! |
| <b>LAMC1</b>  | 0.1428571429  | 0.1428571429  | 0            |  | inf          | #DIV/0! |
| <b>MC1-A</b>  | 0.1428571429  | 0.1428571429  | 0            |  | inf          | #DIV/0! |
| <b>LAMC2</b>  | 0.1428571429  | 0.1428571429  | 0            |  | inf          | #DIV/0! |
| <b>LAMC3</b>  | 0.09523809524 | 0.09523809524 | 0.0555555556 |  | 1.473684211  | #DIV/0! |
| <b>LAMP3</b>  | 0.1904761905  | 0.1904761905  | 0.0555555556 |  | 3.294117647  | #DIV/0! |
| <b>LAMP5</b>  | 0.1904761905  | 0.1904761905  | 0.1111111111 |  | 1.529411765  | #DIV/0! |
| <b>AMP5-A</b> | 0.1904761905  | 0.1904761905  | 0.1111111111 |  | 1.529411765  | #DIV/0! |
| <b>AMTOR</b>  | 0.1428571429  | 0.1428571429  | 0.1111111111 |  | 1.083333333  | #DIV/0! |
| <b>AMTOR</b>  | 0             | 0             | 0.0555555556 |  | 0            | #DIV/0! |
| <b>AMTOR</b>  | 0.04761904762 | 0.04761904762 | 0.0555555556 |  | 0.7          | #DIV/0! |
| <b>AMTOR</b>  | 0.04761904762 | 0.04761904762 | 0            |  | inf          | #DIV/0! |
| <b>ITORS5</b> | 0.04761904762 | 0.04761904762 | 0            |  | inf          | #DIV/0! |
| <b>LANCL1</b> | 0             | 0             | 0.0555555556 |  | 0            | #DIV/0! |
| <b>NCL1-A</b> | 0             | 0             | 0.0555555556 |  | 0            | #DIV/0! |
| <b>LANCL2</b> | 0.380952381   | 0.380952381   | 0.2222222222 |  | 1.692307692  | #DIV/0! |
| <b>LAP3</b>   | 0             | 0             | 0            |  |              | #DIV/0! |
| <b>APT4</b>   | 0             | 0             | 0.0555555556 |  | 0            | #DIV/0! |
| <b>APT4</b>   | 0.1904761905  | 0.1904761905  | 0.1111111111 |  | 1.529411765  | #DIV/0! |
| <b>LAPT4</b>  | 0.04761904762 | 0.04761904762 | 0.1111111111 |  | 0.325        | #DIV/0! |
| <b>ARGE-A</b> | 0.04761904762 | 0.04761904762 | 0.1666666667 |  | 0.2          | #DIV/0! |

|        |               |               |              |  |              |         |
|--------|---------------|---------------|--------------|--|--------------|---------|
| LARGE1 | 0.04761904762 | 0.04761904762 | 0.1666666667 |  | 0.2          | #DIV/0! |
| LARP1  | 0             | 0             | 0.0555555556 |  | 0            | #DIV/0! |
| LARP1B | 0             | 0             | 0.0555555556 |  | 0            | #DIV/0! |
| LARP4  | 0.09523809524 | 0.09523809524 | 0.0555555556 |  | 1.473684211  | #DIV/0! |
| LARP4B | 0.04761904762 | 0.04761904762 | 0.1111111111 |  | 0.325        | #DIV/0! |
| LARP6  | 0.04761904762 | 0.04761904762 | 0.0555555556 |  | 0.7          | #DIV/0! |
| LARP7  | 0             | 0             | 0.0555555556 |  | 0            | #DIV/0! |
| LASP1  | 0.09523809524 | 0.09523809524 | 0            |  | inf          | #DIV/0! |
| LAT    | 0.04761904762 | 0.04761904762 | 0            |  | inf          | #DIV/0! |
| LAT2   | 0.1428571429  | 0.1428571429  | 0.1111111111 |  | 1.083333333  | #DIV/0! |
| LATS1  | 0             | 0             | 0            |  |              | #DIV/0! |
| LATS2  | 0.04761904762 | 0.04761904762 | 0            |  | inf          | #DIV/0! |
| LAX1   | 0.2380952381  | 0.2380952381  | 0            |  | inf          | #DIV/0! |
| LBH    | 0             | 0             | 0.0555555556 |  | 0            | #DIV/0! |
| LBP    | 0.1428571429  | 0.1428571429  | 0.1666666667 |  | 0.6666666667 | #DIV/0! |
| LBR    | 0.1428571429  | 0.1428571429  | 0.0555555556 |  | 2.333333333  | #DIV/0! |
| LBX1   | 0.1428571429  | 0.1428571429  | 0            |  | inf          | #DIV/0! |
| BX1-AS | 0.1428571429  | 0.1428571429  | 0            |  | inf          | #DIV/0! |
| LBX2   | 0             | 0             | 0.0555555556 |  | 0            | #DIV/0! |
| BX2-AS | 0             | 0             | 0.0555555556 |  | 0            | #DIV/0! |
| LCA5L  | 0.04761904762 | 0.04761904762 | 0.0555555556 |  | 0.7          | #DIV/0! |
| LCAT   | 0.1428571429  | 0.1428571429  | 0.0555555556 |  | 2.333333333  | #DIV/0! |
| LCE1A  | 0.1904761905  | 0.1904761905  | 0            |  | inf          | #DIV/0! |
| LCE1B  | 0.1904761905  | 0.1904761905  | 0            |  | inf          | #DIV/0! |
| LCE1C  | 0.1904761905  | 0.1904761905  | 0            |  | inf          | #DIV/0! |
| LCE1D  | 0.1904761905  | 0.1904761905  | 0            |  | inf          | #DIV/0! |
| LCE1E  | 0.1904761905  | 0.1904761905  | 0            |  | inf          | #DIV/0! |
| LCE1F  | 0.1904761905  | 0.1904761905  | 0            |  | inf          | #DIV/0! |
| LCE2A  | 0.1904761905  | 0.1904761905  | 0            |  | inf          | #DIV/0! |
| LCE2B  | 0.1904761905  | 0.1904761905  | 0            |  | inf          | #DIV/0! |
| LCE2C  | 0.1904761905  | 0.1904761905  | 0            |  | inf          | #DIV/0! |
| LCE2D  | 0.1904761905  | 0.1904761905  | 0            |  | inf          | #DIV/0! |
| LCE3A  | 0.1904761905  | 0.1904761905  | 0            |  | inf          | #DIV/0! |
| LCE3B  | 0.1904761905  | 0.1904761905  | 0            |  | inf          | #DIV/0! |
| LCE3C  | 0.1904761905  | 0.1904761905  | 0            |  | inf          | #DIV/0! |
| LCE3D  | 0.1904761905  | 0.1904761905  | 0            |  | inf          | #DIV/0! |
| LCE3E  | 0.1904761905  | 0.1904761905  | 0            |  | inf          | #DIV/0! |
| LCE4A  | 0.1904761905  | 0.1904761905  | 0            |  | inf          | #DIV/0! |
| LCE5A  | 0.1904761905  | 0.1904761905  | 0            |  | inf          | #DIV/0! |
| LCE6A  | 0.1904761905  | 0.1904761905  | 0            |  | inf          | #DIV/0! |
| LCK    | 0.04761904762 | 0.04761904762 | 0.1111111111 |  | 0.325        | #DIV/0! |
| LCLAT1 | 0             | 0             | 0.0555555556 |  | 0            | #DIV/0! |
| LCMT1  | 0.04761904762 | 0.04761904762 | 0            |  | inf          | #DIV/0! |
| CMT1-A | 0.04761904762 | 0.04761904762 | 0            |  | inf          | #DIV/0! |
| CMT1-A | 0.04761904762 | 0.04761904762 | 0            |  | inf          | #DIV/0! |
| LCN1   | 0.04761904762 | 0.04761904762 | 0            |  | inf          | #DIV/0! |
| LCN10  | 0.1428571429  | 0.1428571429  | 0.0555555556 |  | 2.333333333  | #DIV/0! |
| LCN12  | 0.1428571429  | 0.1428571429  | 0.0555555556 |  | 2.333333333  | #DIV/0! |
| LCN15  | 0.1428571429  | 0.1428571429  | 0.0555555556 |  | 2.333333333  | #DIV/0! |
| LCN2   | 0.09523809524 | 0.09523809524 | 0.0555555556 |  | 1.473684211  | #DIV/0! |
| LCN6   | 0.1428571429  | 0.1428571429  | 0.0555555556 |  | 2.333333333  | #DIV/0! |

|         |               |               |              |  |              |         |
|---------|---------------|---------------|--------------|--|--------------|---------|
| LCN8    | 0.1428571429  | 0.1428571429  | 0.0555555556 |  | 2.333333333  | #DIV/0! |
| LCNL1   | 0.1428571429  | 0.1428571429  | 0.0555555556 |  | 2.333333333  | #DIV/0! |
| LCOR    | 0.1428571429  | 0.1428571429  | 0            |  | inf          | #DIV/0! |
| LCORL   | 0             | 0             | 0            |  |              | #DIV/0! |
| LCP2    | 0             | 0             | 0.0555555556 |  | 0            | #DIV/0! |
| LCT     | 0.04761904762 | 0.04761904762 | 0.0555555556 |  | 0.7          | #DIV/0! |
| LCTL    | 0.04761904762 | 0.04761904762 | 0.0555555556 |  | 0.7          | #DIV/0! |
| LDAH    | 0             | 0             | 0.0555555556 |  | 0            | #DIV/0! |
| LDB1    | 0.1428571429  | 0.1428571429  | 0.0555555556 |  | 2.333333333  | #DIV/0! |
| LDB2    | 0             | 0             | 0            |  |              | #DIV/0! |
| LDB3    | 0.1428571429  | 0.1428571429  | 0.0555555556 |  | 2.333333333  | #DIV/0! |
| DHAL6   | 0.04761904762 | 0.04761904762 | 0.0555555556 |  | 0.7          | #DIV/0! |
| LDHB    | 0.04761904762 | 0.04761904762 | 0.0555555556 |  | 0.7          | #DIV/0! |
| LDHD    | 0.04761904762 | 0.04761904762 | 0            |  | inf          | #DIV/0! |
| LDLR    | 0.1428571429  | 0.1428571429  | 0.1111111111 |  | 1.083333333  | #DIV/0! |
| DLRAD   | 0.04761904762 | 0.04761904762 | 0.0555555556 |  | 0.7          | #DIV/0! |
| DLRAD   | 0.04761904762 | 0.04761904762 | 0.1111111111 |  | 0.325        | #DIV/0! |
| DLRAD   | 0.09523809524 | 0.09523809524 | 0.0555555556 |  | 1.473684211  | #DIV/0! |
| RAD4    | 0.09523809524 | 0.09523809524 | 0.0555555556 |  | 1.473684211  | #DIV/0! |
| DLRAP   | 0.04761904762 | 0.04761904762 | 0.1111111111 |  | 0.325        | #DIV/0! |
| LEAP2   | 0.04761904762 | 0.04761904762 | 0            |  | inf          | #DIV/0! |
| LECT2   | 0.04761904762 | 0.04761904762 | 0            |  | inf          | #DIV/0! |
| LEF1    | 0             | 0             | 0.0555555556 |  | 0            | #DIV/0! |
| EF1-AS  | 0             | 0             | 0.0555555556 |  | 0            | #DIV/0! |
| LEFTY1  | 0.1428571429  | 0.1428571429  | 0.0555555556 |  | 2.333333333  | #DIV/0! |
| LEFTY2  | 0.1428571429  | 0.1428571429  | 0.0555555556 |  | 2.333333333  | #DIV/0! |
| LEKR1   | 0.1428571429  | 0.1428571429  | 0.0555555556 |  | 2.333333333  | #DIV/0! |
| LHELP1  | 0.1904761905  | 0.1904761905  | 0            |  | inf          | #DIV/0! |
| LEMD1   | 0.1904761905  | 0.1904761905  | 0            |  | inf          | #DIV/0! |
| EMD1-A  | 0.1904761905  | 0.1904761905  | 0            |  | inf          | #DIV/0! |
| LEMD2   | 0.04761904762 | 0.04761904762 | 0            |  | inf          | #DIV/0! |
| LEMD3   | 0.09523809524 | 0.09523809524 | 0.0555555556 |  | 1.473684211  | #DIV/0! |
| LENEP   | 0.1904761905  | 0.1904761905  | 0.1111111111 |  | 1.529411765  | #DIV/0! |
| LENG1   | 0.09523809524 | 0.09523809524 | 0.0555555556 |  | 1.473684211  | #DIV/0! |
| LENG8   | 0.09523809524 | 0.09523809524 | 0.0555555556 |  | 1.473684211  | #DIV/0! |
| ENG8-AS | 0.09523809524 | 0.09523809524 | 0.0555555556 |  | 1.473684211  | #DIV/0! |
| LENG9   | 0.09523809524 | 0.09523809524 | 0.0555555556 |  | 1.473684211  | #DIV/0! |
| LEO1    | 0.04761904762 | 0.04761904762 | 0.0555555556 |  | 0.7          | #DIV/0! |
| LEP     | 0.04761904762 | 0.04761904762 | 0.0555555556 |  | 0.7          | #DIV/0! |
| LEPR    | 0.04761904762 | 0.04761904762 | 0.0555555556 |  | 0.7          | #DIV/0! |
| LEPROT  | 0.04761904762 | 0.04761904762 | 0.0555555556 |  | 0.7          | #DIV/0! |
| EPROTI  | 0.04761904762 | 0.04761904762 | 0.1111111111 |  | 0.325        | #DIV/0! |
| LETM1   | 0.04761904762 | 0.04761904762 | 0            |  | inf          | #DIV/0! |
| LETM2   | 0.09523809524 | 0.09523809524 | 0.1111111111 |  | 0.6842105263 | #DIV/0! |
| ETMD    | 0.09523809524 | 0.09523809524 | 0.0555555556 |  | 1.473684211  | #DIV/0! |
| LEUTX   | 0.04761904762 | 0.04761904762 | 0.0555555556 |  | 0.7          | #DIV/0! |
| LEXM    | 0.04761904762 | 0.04761904762 | 0.0555555556 |  | 0.7          | #DIV/0! |
| LFNG    | 0.04761904762 | 0.04761904762 | 0.1666666667 |  | 0.2          | #DIV/0! |
| LGALS1  | 0             | 0             | 0.1111111111 |  | 0            | #DIV/0! |
| GALS1   | 0.04761904762 | 0.04761904762 | 0.0555555556 |  | 0.7          | #DIV/0! |
| GALS1   | 0.04761904762 | 0.04761904762 | 0.0555555556 |  | 0.7          | #DIV/0! |



|         |               |               |               |  |              |         |
|---------|---------------|---------------|---------------|--|--------------|---------|
| LGALS1  | 0.04761904762 | 0.04761904762 | 0.05555555556 |  | 0.7          | #DIV/0! |
| GALS17  | 0.04761904762 | 0.04761904762 | 0.05555555556 |  | 0.7          | #DIV/0! |
| LGALS2  | 0             | 0             | 0.1111111111  |  | 0            | #DIV/0! |
| LGALS3  | 0.04761904762 | 0.04761904762 | 0             |  | inf          | #DIV/0! |
| GALS3B  | 0.04761904762 | 0.04761904762 | 0             |  | inf          | #DIV/0! |
| LGALS4  | 0.04761904762 | 0.04761904762 | 0.05555555556 |  | 0.7          | #DIV/0! |
| LGALS7  | 0.04761904762 | 0.04761904762 | 0.05555555556 |  | 0.7          | #DIV/0! |
| GALS7I  | 0.04761904762 | 0.04761904762 | 0.05555555556 |  | 0.7          | #DIV/0! |
| LGALS8  | 0.1428571429  | 0.1428571429  | 0             |  | inf          | #DIV/0! |
| FALS8-A | 0.1428571429  | 0.1428571429  | 0             |  | inf          | #DIV/0! |
| LGALS9  | 0.04761904762 | 0.04761904762 | 0.05555555556 |  | 0.7          | #DIV/0! |
| GALS9I  | 0.09523809524 | 0.09523809524 | 0.05555555556 |  | 1.473684211  | #DIV/0! |
| GALS9C  | 0.04761904762 | 0.04761904762 | 0.1111111111  |  | 0.325        | #DIV/0! |
| LGALS   | 0             | 0             | 0.05555555556 |  | 0            | #DIV/0! |
| LGII    | 0.1428571429  | 0.1428571429  | 0             |  | inf          | #DIV/0! |
| LG3     | 0.09523809524 | 0.09523809524 | 0.1111111111  |  | 0.6842105263 | #DIV/0! |
| LG4     | 0.04761904762 | 0.04761904762 | 0.05555555556 |  | 0.7          | #DIV/0! |
| LGR5    | 0.04761904762 | 0.04761904762 | 0.1111111111  |  | 0.325        | #DIV/0! |
| LGR6    | 0.1428571429  | 0.1428571429  | 0             |  | inf          | #DIV/0! |
| LHB     | 0.09523809524 | 0.09523809524 | 0.1111111111  |  | 0.6842105263 | #DIV/0! |
| LHCGR   | 0             | 0             | 0.05555555556 |  | 0            | #DIV/0! |
| LHFPL2  | 0.04761904762 | 0.04761904762 | 0             |  | inf          | #DIV/0! |
| LHFPL3  | 0.09523809524 | 0.09523809524 | 0.05555555556 |  | 1.473684211  | #DIV/0! |
| IFPL3-A | 0.09523809524 | 0.09523809524 | 0.05555555556 |  | 1.473684211  | #DIV/0! |
| IFPL3-A | 0.04761904762 | 0.04761904762 | 0.05555555556 |  | 0.7          | #DIV/0! |
| LHFPL4  | 0.09523809524 | 0.09523809524 | 0             |  | inf          | #DIV/0! |
| LHFPL5  | 0.04761904762 | 0.04761904762 | 0.05555555556 |  | 0.7          | #DIV/0! |
| LHPP    | 0.2380952381  | 0.2380952381  | 0.05555555556 |  | 4.375        | #DIV/0! |
| LHX1    | 0.04761904762 | 0.04761904762 | 0             |  | inf          | #DIV/0! |
| HX1-D   | 0.04761904762 | 0.04761904762 | 0             |  | inf          | #DIV/0! |
| LHX2    | 0.09523809524 | 0.09523809524 | 0.05555555556 |  | 1.473684211  | #DIV/0! |
| LHX3    | 0.1428571429  | 0.1428571429  | 0.05555555556 |  | 2.333333333  | #DIV/0! |
| LHX4    | 0.1428571429  | 0.1428571429  | 0             |  | inf          | #DIV/0! |
| HX4-AS  | 0.1428571429  | 0.1428571429  | 0             |  | inf          | #DIV/0! |
| LHX5    | 0             | 0             | 0.05555555556 |  | 0            | #DIV/0! |
| HX5-AS  | 0             | 0             | 0.05555555556 |  | 0            | #DIV/0! |
| LHX6    | 0.09523809524 | 0.09523809524 | 0.05555555556 |  | 1.473684211  | #DIV/0! |
| LHX8    | 0.04761904762 | 0.04761904762 | 0.05555555556 |  | 0.7          | #DIV/0! |
| LHX9    | 0.1428571429  | 0.1428571429  | 0             |  | inf          | #DIV/0! |
| LIAS    | 0.1904761905  | 0.1904761905  | 0.05555555556 |  | 3.294117647  | #DIV/0! |
| LIF     | 0.04761904762 | 0.04761904762 | 0.1111111111  |  | 0.325        | #DIV/0! |
| LIF-AS1 | 0.04761904762 | 0.04761904762 | 0.1111111111  |  | 0.325        | #DIV/0! |
| LIFR    | 0.04761904762 | 0.04761904762 | 0.05555555556 |  | 0.7          | #DIV/0! |
| IFR-AS  | 0.04761904762 | 0.04761904762 | 0.05555555556 |  | 0.7          | #DIV/0! |
| LIG1    | 0.09523809524 | 0.09523809524 | 0.1111111111  |  | 0.6842105263 | #DIV/0! |
| LILRA1  | 0.09523809524 | 0.09523809524 | 0.05555555556 |  | 1.473684211  | #DIV/0! |
| LILRA2  | 0.09523809524 | 0.09523809524 | 0.05555555556 |  | 1.473684211  | #DIV/0! |
| LILRA3  | 0.09523809524 | 0.09523809524 | 0.05555555556 |  | 1.473684211  | #DIV/0! |
| LILRA4  | 0.09523809524 | 0.09523809524 | 0.05555555556 |  | 1.473684211  | #DIV/0! |
| LILRA5  | 0.09523809524 | 0.09523809524 | 0.05555555556 |  | 1.473684211  | #DIV/0! |
| LILRA6  | 0.09523809524 | 0.09523809524 | 0.05555555556 |  | 1.473684211  | #DIV/0! |

|         |               |               |               |  |              |         |
|---------|---------------|---------------|---------------|--|--------------|---------|
| LILRB1  | 0.09523809524 | 0.09523809524 | 0.05555555556 |  | 1.473684211  | #DIV/0! |
| LILRB2  | 0.09523809524 | 0.09523809524 | 0.05555555556 |  | 1.473684211  | #DIV/0! |
| LILRB3  | 0.09523809524 | 0.09523809524 | 0.05555555556 |  | 1.473684211  | #DIV/0! |
| LILRB4  | 0.09523809524 | 0.09523809524 | 0.05555555556 |  | 1.473684211  | #DIV/0! |
| LILRB5  | 0.09523809524 | 0.09523809524 | 0.05555555556 |  | 1.473684211  | #DIV/0! |
| LILRP2  | 0.09523809524 | 0.09523809524 | 0.05555555556 |  | 1.473684211  | #DIV/0! |
| LIMA1   | 0.09523809524 | 0.09523809524 | 0.05555555556 |  | 1.473684211  | #DIV/0! |
| LIMCH1  | 0.04761904762 | 0.04761904762 | 0             |  | inf          | #DIV/0! |
| LIMD2   | 0.04761904762 | 0.04761904762 | 0             |  | inf          | #DIV/0! |
| LIME1   | 0.1428571429  | 0.1428571429  | 0.2222222222  |  | 0.4583333333 | #DIV/0! |
| LIMK1   | 0.1428571429  | 0.1428571429  | 0.1111111111  |  | 1.0833333333 | #DIV/0! |
| LIMK2   | 0.04761904762 | 0.04761904762 | 0.1111111111  |  | 0.325        | #DIV/0! |
| LIMS1   | 0             | 0             | 0.05555555556 |  | 0            | #DIV/0! |
| MS1-AS  | 0             | 0             | 0.05555555556 |  | 0            | #DIV/0! |
| LIMS2   | 0             | 0             | 0.05555555556 |  | 0            | #DIV/0! |
| LIMS3   | 0             | 0             | 0.05555555556 |  | 0            | #DIV/0! |
| 3-LOC4  | 0             | 0             | 0.05555555556 |  | 0            | #DIV/0! |
| LIMS4   | 0             | 0             | 0.05555555556 |  | 0            | #DIV/0! |
| LIN28A  | 0.04761904762 | 0.04761904762 | 0.1111111111  |  | 0.325        | #DIV/0! |
| LIN37   | 0.04761904762 | 0.04761904762 | 0.05555555556 |  | 0.7          | #DIV/0! |
| LIN52   | 0.09523809524 | 0.09523809524 | 0             |  | inf          | #DIV/0! |
| LIN54   | 0             | 0             | 0.05555555556 |  | 0            | #DIV/0! |
| LIN7A   | 0.04761904762 | 0.04761904762 | 0.05555555556 |  | 0.7          | #DIV/0! |
| LIN7B   | 0.09523809524 | 0.09523809524 | 0.1111111111  |  | 0.6842105263 | #DIV/0! |
| LIN9    | 0.1904761905  | 0.1904761905  | 0             |  | inf          | #DIV/0! |
| INC-PIN | 0.04761904762 | 0.04761904762 | 0.05555555556 |  | 0.7          | #DIV/0! |
| INC-RO  | 0.09523809524 | 0.09523809524 | 0             |  | inf          | #DIV/0! |
| INC0002 | 0.09523809524 | 0.09523809524 | 0.05555555556 |  | 1.473684211  | #DIV/0! |
| INC0002 | 0.1428571429  | 0.1428571429  | 0.2222222222  |  | 0.4583333333 | #DIV/0! |
| INC0003 | 0.04761904762 | 0.04761904762 | 0.05555555556 |  | 0.7          | #DIV/0! |
| INC0005 | 0.04761904762 | 0.04761904762 | 0.1666666667  |  | 0.2          | #DIV/0! |
| INC0005 | 0.04761904762 | 0.04761904762 | 0.05555555556 |  | 0.7          | #DIV/0! |
| INC0009 | 0.04761904762 | 0.04761904762 | 0.05555555556 |  | 0.7          | #DIV/0! |
| INC0011 | 0.04761904762 | 0.04761904762 | 0.1111111111  |  | 0.325        | #DIV/0! |
| INC0011 | 0.04761904762 | 0.04761904762 | 0.1111111111  |  | 0.325        | #DIV/0! |
| INC0011 | 0.04761904762 | 0.04761904762 | 0.1111111111  |  | 0.325        | #DIV/0! |
| INC0011 | 0.04761904762 | 0.04761904762 | 0.1111111111  |  | 0.325        | #DIV/0! |
| INC0011 | 0             | 0             | 0.1111111111  |  | 0            | #DIV/0! |
| INC0015 | 0.04761904762 | 0.04761904762 | 0.1111111111  |  | 0.325        | #DIV/0! |
| INC0015 | 0.04761904762 | 0.04761904762 | 0.1111111111  |  | 0.325        | #DIV/0! |
| INC0016 | 0.04761904762 | 0.04761904762 | 0.1666666667  |  | 0.2          | #DIV/0! |
| INC0016 | 0.04761904762 | 0.04761904762 | 0.1111111111  |  | 0.325        | #DIV/0! |
| INC0016 | 0.04761904762 | 0.04761904762 | 0.1111111111  |  | 0.325        | #DIV/0! |
| INC0017 | 0             | 0             | 0.05555555556 |  | 0            | #DIV/0! |
| INC0017 | 0.04761904762 | 0.04761904762 | 0.1111111111  |  | 0.325        | #DIV/0! |
| INC0018 | 0.09523809524 | 0.09523809524 | 0.05555555556 |  | 1.473684211  | #DIV/0! |
| INC0018 | 0.04761904762 | 0.04761904762 | 0.1111111111  |  | 0.325        | #DIV/0! |
| INC0020 | 0.04761904762 | 0.04761904762 | 0.1111111111  |  | 0.325        | #DIV/0! |
| INC0020 | 0.04761904762 | 0.04761904762 | 0.1111111111  |  | 0.325        | #DIV/0! |
| INC0020 | 0             | 0             | 0.1666666667  |  | 0            | #DIV/0! |
| INC0020 | 0.09523809524 | 0.09523809524 | 0.1111111111  |  | 0.6842105263 | #DIV/0! |

|         |               |               |               |  |              |         |
|---------|---------------|---------------|---------------|--|--------------|---------|
| INC0021 | 0.1428571429  | 0.1428571429  | 0             |  | inf          | #DIV/0! |
| INC0021 | 0             | 0             | 0.05555555556 |  | 0            | #DIV/0! |
| INC0021 | 0.04761904762 | 0.04761904762 | 0             |  | inf          | #DIV/0! |
| INC0022 | 0.04761904762 | 0.04761904762 | 0             |  | inf          | #DIV/0! |
| INC0022 | 0             | 0             | 0             |  |              | #DIV/0! |
| INC0022 | 0.04761904762 | 0.04761904762 | 0             |  | inf          | #DIV/0! |
| INC0022 | 0             | 0             | 0.1666666667  |  | 0            | #DIV/0! |
| INC0023 | 0.04761904762 | 0.04761904762 | 0.2222222222  |  | 0.1375       | #DIV/0! |
| INC0023 | 0.1904761905  | 0.1904761905  | 0.05555555556 |  | 3.294117647  | #DIV/0! |
| INC0024 | 0.1428571429  | 0.1428571429  | 0.05555555556 |  | 2.333333333  | #DIV/0! |
| INC0025 | 0.1428571429  | 0.1428571429  | 0.1666666667  |  | 0.6666666667 | #DIV/0! |
| INC0025 | 0.09523809524 | 0.09523809524 | 0.2222222222  |  | 0.2894736842 | #DIV/0! |
| INC0026 | 0.2380952381  | 0.2380952381  | 0             |  | inf          | #DIV/0! |
| INC0026 | 0.1904761905  | 0.1904761905  | 0.05555555556 |  | 3.294117647  | #DIV/0! |
| INC0026 | 0.04761904762 | 0.04761904762 | 0.2222222222  |  | 0.1375       | #DIV/0! |
| INC0026 | 0.1428571429  | 0.1428571429  | 0.2222222222  |  | 0.4583333333 | #DIV/0! |
| INC0027 | 0             | 0             | 0.05555555556 |  | 0            | #DIV/0! |
| INC0029 | 0             | 0             | 0.05555555556 |  | 0            | #DIV/0! |
| INC0029 | 0.09523809524 | 0.09523809524 | 0.1666666667  |  | 0.4210526316 | #DIV/0! |
| INC0029 | 0.04761904762 | 0.04761904762 | 0             |  | inf          | #DIV/0! |
| INC0029 | 0             | 0             | 0.05555555556 |  | 0            | #DIV/0! |
| INC0029 | 0             | 0             | 0.05555555556 |  | 0            | #DIV/0! |
| INC0030 | 0.1904761905  | 0.1904761905  | 0             |  | inf          | #DIV/0! |
| INC0030 | 0.2380952381  | 0.2380952381  | 0             |  | inf          | #DIV/0! |
| INC0030 | 0.09523809524 | 0.09523809524 | 0             |  | inf          | #DIV/0! |
| INC0030 | 0.04761904762 | 0.04761904762 | 0             |  | inf          | #DIV/0! |
| INC0030 | 0.04761904762 | 0.04761904762 | 0.05555555556 |  | 0.7          | #DIV/0! |
| INC0030 | 0.04761904762 | 0.04761904762 | 0.1111111111  |  | 0.325        | #DIV/0! |
| INC0030 | 0             | 0             | 0.05555555556 |  | 0            | #DIV/0! |
| INC0031 | 0.04761904762 | 0.04761904762 | 0.1111111111  |  | 0.325        | #DIV/0! |
| INC0031 | 0.04761904762 | 0.04761904762 | 0             |  | inf          | #DIV/0! |
| INC0031 | 0.04761904762 | 0.04761904762 | 0             |  | inf          | #DIV/0! |
| INC0031 | 0.04761904762 | 0.04761904762 | 0.1666666667  |  | 0.2          | #DIV/0! |
| INC0031 | 0.04761904762 | 0.04761904762 | 0.1111111111  |  | 0.325        | #DIV/0! |
| INC0031 | 0.04761904762 | 0.04761904762 | 0.1111111111  |  | 0.325        | #DIV/0! |
| INC0031 | 0.04761904762 | 0.04761904762 | 0.1111111111  |  | 0.325        | #DIV/0! |
| INC0031 | 0.04761904762 | 0.04761904762 | 0.1666666667  |  | 0.2          | #DIV/0! |
| INC0032 | 0.04761904762 | 0.04761904762 | 0.1666666667  |  | 0.2          | #DIV/0! |
| INC0032 | 0.04761904762 | 0.04761904762 | 0.1666666667  |  | 0.2          | #DIV/0! |
| INC0032 | 0.04761904762 | 0.04761904762 | 0.1111111111  |  | 0.325        | #DIV/0! |
| INC0032 | 0.04761904762 | 0.04761904762 | 0.05555555556 |  | 0.7          | #DIV/0! |
| INC0033 | 0.04761904762 | 0.04761904762 | 0.1111111111  |  | 0.325        | #DIV/0! |
| INC0033 | 0.04761904762 | 0.04761904762 | 0             |  | inf          | #DIV/0! |
| INC0033 | 0             | 0             | 0.05555555556 |  | 0            | #DIV/0! |
| INC0033 | 0.04761904762 | 0.04761904762 | 0.1111111111  |  | 0.325        | #DIV/0! |
| INC0034 | 0             | 0             | 0.1111111111  |  | 0            | #DIV/0! |
| INC0035 | 0.04761904762 | 0.04761904762 | 0             |  | inf          | #DIV/0! |
| INC0036 | 0.04761904762 | 0.04761904762 | 0             |  | inf          | #DIV/0! |
| INC0040 | 0.04761904762 | 0.04761904762 | 0             |  | inf          | #DIV/0! |
| INC0041 | 0.04761904762 | 0.04761904762 | 0             |  | inf          | #DIV/0! |
| INC0042 | 0.04761904762 | 0.04761904762 | 0             |  | inf          | #DIV/0! |

|         |               |               |               |  |              |         |
|---------|---------------|---------------|---------------|--|--------------|---------|
| INC0044 | 0.04761904762 | 0.04761904762 | 0             |  | inf          | #DIV/0! |
| INC0046 | 0.04761904762 | 0.04761904762 | 0             |  | inf          | #DIV/0! |
| INC0046 | 0.04761904762 | 0.04761904762 | 0.05555555556 |  | 0.7          | #DIV/0! |
| INC0046 | 0.1428571429  | 0.1428571429  | 0             |  | inf          | #DIV/0! |
| INC0046 | 0.04761904762 | 0.04761904762 | 0             |  | inf          | #DIV/0! |
| INC0047 | 0.09523809524 | 0.09523809524 | 0             |  | inf          | #DIV/0! |
| INC0047 | 0             | 0             | 0.05555555556 |  | 0            | #DIV/0! |
| INC0047 | 0.04761904762 | 0.04761904762 | 0.05555555556 |  | 0.7          | #DIV/0! |
| INC0047 | 0.04761904762 | 0.04761904762 | 0.05555555556 |  | 0.7          | #DIV/0! |
| INC0047 | 0.04761904762 | 0.04761904762 | 0.05555555556 |  | 0.7          | #DIV/0! |
| INC0047 | 0.04761904762 | 0.04761904762 | 0.05555555556 |  | 0.7          | #DIV/0! |
| INC0047 | 0.04761904762 | 0.04761904762 | 0.1111111111  |  | 0.325        | #DIV/0! |
| INC0048 | 0.04761904762 | 0.04761904762 | 0             |  | inf          | #DIV/0! |
| INC0048 | 0.04761904762 | 0.04761904762 | 0.05555555556 |  | 0.7          | #DIV/0! |
| INC0048 | 0.04761904762 | 0.04761904762 | 0.1111111111  |  | 0.325        | #DIV/0! |
| INC0048 | 0             | 0             | 0.05555555556 |  | 0            | #DIV/0! |
| INC0048 | 0.09523809524 | 0.09523809524 | 0.05555555556 |  | 1.473684211  | #DIV/0! |
| INC0048 | 0.1428571429  | 0.1428571429  | 0.1666666667  |  | 0.6666666667 | #DIV/0! |
| INC0049 | 0.04761904762 | 0.04761904762 | 0             |  | inf          | #DIV/0! |
| INC0049 | 0.04761904762 | 0.04761904762 | 0             |  | inf          | #DIV/0! |
| INC0049 | 0.1428571429  | 0.1428571429  | 0.1666666667  |  | 0.6666666667 | #DIV/0! |
| INC0049 | 0             | 0             | 0.05555555556 |  | 0            | #DIV/0! |
| INC0050 | 0.1904761905  | 0.1904761905  | 0.1111111111  |  | 1.529411765  | #DIV/0! |
| INC0050 | 0.1428571429  | 0.1428571429  | 0.1111111111  |  | 1.083333333  | #DIV/0! |
| INC0050 | 0             | 0             | 0             |  |              | #DIV/0! |
| INC0050 | 0.04761904762 | 0.04761904762 | 0             |  | inf          | #DIV/0! |
| INC0050 | 0.09523809524 | 0.09523809524 | 0.05555555556 |  | 1.473684211  | #DIV/0! |
| INC0050 | 0.09523809524 | 0.09523809524 | 0.05555555556 |  | 1.473684211  | #DIV/0! |
| INC0051 | 0             | 0             | 0             |  |              | #DIV/0! |
| INC0051 | 0.04761904762 | 0.04761904762 | 0.05555555556 |  | 0.7          | #DIV/0! |
| INC0051 | 0.04761904762 | 0.04761904762 | 0.1111111111  |  | 0.325        | #DIV/0! |
| INC0051 | 0.04761904762 | 0.04761904762 | 0.1111111111  |  | 0.325        | #DIV/0! |
| INC0051 | 0.04761904762 | 0.04761904762 | 0             |  | inf          | #DIV/0! |
| INC0052 | 0.04761904762 | 0.04761904762 | 0             |  | inf          | #DIV/0! |
| INC0052 | 0.04761904762 | 0.04761904762 | 0.2222222222  |  | 0.1375       | #DIV/0! |
| INC0052 | 0.09523809524 | 0.09523809524 | 0             |  | inf          | #DIV/0! |
| INC0052 | 0.04761904762 | 0.04761904762 | 0.05555555556 |  | 0.7          | #DIV/0! |
| INC0053 | 0.1904761905  | 0.1904761905  | 0.1111111111  |  | 1.529411765  | #DIV/0! |
| INC0053 | 0.1904761905  | 0.1904761905  | 0.1111111111  |  | 1.529411765  | #DIV/0! |
| INC0053 | 0.1904761905  | 0.1904761905  | 0.1666666667  |  | 0.9411764706 | #DIV/0! |
| INC0053 | 0.09523809524 | 0.09523809524 | 0.2222222222  |  | 0.2894736842 | #DIV/0! |
| INC0053 | 0.1428571429  | 0.1428571429  | 0             |  | inf          | #DIV/0! |
| INC0056 | 0             | 0             | 0.05555555556 |  | 0            | #DIV/0! |
| INC0057 | 0             | 0             | 0.05555555556 |  | 0            | #DIV/0! |
| INC0057 | 0             | 0             | 0.05555555556 |  | 0            | #DIV/0! |
| INC0057 | 0.1904761905  | 0.1904761905  | 0.1111111111  |  | 1.529411765  | #DIV/0! |
| INC0058 | 0.1428571429  | 0.1428571429  | 0             |  | inf          | #DIV/0! |
| INC0058 | 0.09523809524 | 0.09523809524 | 0.05555555556 |  | 1.473684211  | #DIV/0! |
| INC0058 | 0.04761904762 | 0.04761904762 | 0             |  | inf          | #DIV/0! |
| INC0058 | 0.1428571429  | 0.1428571429  | 0.1111111111  |  | 1.083333333  | #DIV/0! |
| INC0058 | 0.04761904762 | 0.04761904762 | 0.1111111111  |  | 0.325        | #DIV/0! |

|         |               |               |               |  |              |         |
|---------|---------------|---------------|---------------|--|--------------|---------|
| INC0059 | 0.04761904762 | 0.04761904762 | 0.05555555556 |  | 0.7          | #DIV/0! |
| INC0059 | 0.04761904762 | 0.04761904762 | 0.05555555556 |  | 0.7          | #DIV/0! |
| INC0059 | 0.1428571429  | 0.1428571429  | 0.05555555556 |  | 2.333333333  | #DIV/0! |
| INC0059 | 0.04761904762 | 0.04761904762 | 0.05555555556 |  | 0.7          | #DIV/0! |
| INC0059 | 0.09523809524 | 0.09523809524 | 0.1111111111  |  | 0.6842105263 | #DIV/0! |
| INC0060 | 0.2380952381  | 0.2380952381  | 0.05555555556 |  | 4.375        | #DIV/0! |
| INC0060 | 0.04761904762 | 0.04761904762 | 0.05555555556 |  | 0.7          | #DIV/0! |
| INC0060 | 0.04761904762 | 0.04761904762 | 0             |  | inf          | #DIV/0! |
| INC0060 | 0             | 0             | 0.05555555556 |  | 0            | #DIV/0! |
| INC0060 | 0             | 0             | 0.05555555556 |  | 0            | #DIV/0! |
| INC0061 | 0.04761904762 | 0.04761904762 | 0.1111111111  |  | 0.325        | #DIV/0! |
| INC0061 | 0             | 0             | 0.05555555556 |  | 0            | #DIV/0! |
| INC0061 | 0.04761904762 | 0.04761904762 | 0.05555555556 |  | 0.7          | #DIV/0! |
| INC0061 | 0             | 0             | 0.05555555556 |  | 0            | #DIV/0! |
| INC0061 | 0.1428571429  | 0.1428571429  | 0.05555555556 |  | 2.333333333  | #DIV/0! |
| INC0062 | 0.04761904762 | 0.04761904762 | 0             |  | inf          | #DIV/0! |
| INC0062 | 0.04761904762 | 0.04761904762 | 0.05555555556 |  | 0.7          | #DIV/0! |
| INC0062 | 0.1428571429  | 0.1428571429  | 0.05555555556 |  | 2.333333333  | #DIV/0! |
| INC0062 | 0.1428571429  | 0.1428571429  | 0.05555555556 |  | 2.333333333  | #DIV/0! |
| INC0062 | 0.1428571429  | 0.1428571429  | 0             |  | inf          | #DIV/0! |
| INC0062 | 0.2380952381  | 0.2380952381  | 0             |  | inf          | #DIV/0! |
| INC0063 | 0             | 0             | 0.1111111111  |  | 0            | #DIV/0! |
| INC0063 | 0.09523809524 | 0.09523809524 | 0.05555555556 |  | 1.473684211  | #DIV/0! |
| INC0063 | 0.09523809524 | 0.09523809524 | 0.05555555556 |  | 1.473684211  | #DIV/0! |
| INC0063 | 0.04761904762 | 0.04761904762 | 0.05555555556 |  | 0.7          | #DIV/0! |
| INC0064 | 0.04761904762 | 0.04761904762 | 0             |  | inf          | #DIV/0! |
| INC0064 | 0.04761904762 | 0.04761904762 | 0             |  | inf          | #DIV/0! |
| INC0064 | 0.04761904762 | 0.04761904762 | 0.1111111111  |  | 0.325        | #DIV/0! |
| INC0065 | 0.1904761905  | 0.1904761905  | 0.05555555556 |  | 3.294117647  | #DIV/0! |
| INC0065 | 0.1904761905  | 0.1904761905  | 0.05555555556 |  | 3.294117647  | #DIV/0! |
| INC0065 | 0.1904761905  | 0.1904761905  | 0.05555555556 |  | 3.294117647  | #DIV/0! |
| INC0065 | 0.1904761905  | 0.1904761905  | 0.05555555556 |  | 3.294117647  | #DIV/0! |
| INC0065 | 0.1904761905  | 0.1904761905  | 0.05555555556 |  | 3.294117647  | #DIV/0! |
| INC0065 | 0.1428571429  | 0.1428571429  | 0.2222222222  |  | 0.4583333333 | #DIV/0! |
| INC0066 | 0.1428571429  | 0.1428571429  | 0.1111111111  |  | 1.083333333  | #DIV/0! |
| INC0066 | 0.09523809524 | 0.09523809524 | 0.05555555556 |  | 1.473684211  | #DIV/0! |
| INC0066 | 0.1428571429  | 0.1428571429  | 0.1111111111  |  | 1.083333333  | #DIV/0! |
| INC0066 | 0.09523809524 | 0.09523809524 | 0             |  | inf          | #DIV/0! |
| INC0066 | 0.04761904762 | 0.04761904762 | 0.05555555556 |  | 0.7          | #DIV/0! |
| INC0066 | 0.09523809524 | 0.09523809524 | 0             |  | inf          | #DIV/0! |
| INC0066 | 0.09523809524 | 0.09523809524 | 0             |  | inf          | #DIV/0! |
| INC0067 | 0.04761904762 | 0.04761904762 | 0.05555555556 |  | 0.7          | #DIV/0! |
| INC0067 | 0.04761904762 | 0.04761904762 | 0             |  | inf          | #DIV/0! |
| INC0067 | 0.09523809524 | 0.09523809524 | 0             |  | inf          | #DIV/0! |
| INC0067 | 0             | 0             | 0             |  |              | #DIV/0! |
| INC0067 | 0             | 0             | 0             |  |              | #DIV/0! |
| INC0068 | 0.04761904762 | 0.04761904762 | 0             |  | inf          | #DIV/0! |
| 0680-GU | 0.04761904762 | 0.04761904762 | 0             |  | inf          | #DIV/0! |
| INC0068 | 0.09523809524 | 0.09523809524 | 0.1111111111  |  | 0.6842105263 | #DIV/0! |
| INC0068 | 0.04761904762 | 0.04761904762 | 0             |  | inf          | #DIV/0! |
| INC0068 | 0.09523809524 | 0.09523809524 | 0.05555555556 |  | 1.473684211  | #DIV/0! |

|         |               |               |              |  |              |         |
|---------|---------------|---------------|--------------|--|--------------|---------|
| INC0068 | 0.1904761905  | 0.1904761905  | 0.1111111111 |  | 1.529411765  | #DIV/0! |
| INC0068 | 0.1428571429  | 0.1428571429  | 0.0555555555 |  | 2.333333333  | #DIV/0! |
| INC0069 | 0.04761904762 | 0.04761904762 | 0            |  | inf          | #DIV/0! |
| INC0069 | 0.04761904762 | 0.04761904762 | 0            |  | inf          | #DIV/0! |
| INC0069 | 0.04761904762 | 0.04761904762 | 0            |  | inf          | #DIV/0! |
| INC0069 | 0.04761904762 | 0.04761904762 | 0            |  | inf          | #DIV/0! |
| INC0069 | 0.04761904762 | 0.04761904762 | 0            |  | inf          | #DIV/0! |
| INC0069 | 0.04761904762 | 0.04761904762 | 0            |  | inf          | #DIV/0! |
| INC0070 | 0.04761904762 | 0.04761904762 | 0.1111111111 |  | 0.325        | #DIV/0! |
| INC0070 | 0             | 0             | 0.1666666667 |  | 0            | #DIV/0! |
| INC0070 | 0.04761904762 | 0.04761904762 | 0.1666666667 |  | 0.2          | #DIV/0! |
| INC0070 | 0.04761904762 | 0.04761904762 | 0.1666666667 |  | 0.2          | #DIV/0! |
| INC0070 | 0.04761904762 | 0.04761904762 | 0.1666666667 |  | 0.2          | #DIV/0! |
| INC0070 | 0.09523809524 | 0.09523809524 | 0.1111111111 |  | 0.6842105263 | #DIV/0! |
| INC0070 | 0.09523809524 | 0.09523809524 | 0.1111111111 |  | 0.6842105263 | #DIV/0! |
| INC0070 | 0.09523809524 | 0.09523809524 | 0.1111111111 |  | 0.6842105263 | #DIV/0! |
| INC0070 | 0.09523809524 | 0.09523809524 | 0.1111111111 |  | 0.6842105263 | #DIV/0! |
| INC0071 | 0.09523809524 | 0.09523809524 | 0.1111111111 |  | 0.6842105263 | #DIV/0! |
| INC0082 | 0.09523809524 | 0.09523809524 | 0.1111111111 |  | 0.6842105263 | #DIV/0! |
| INC0083 | 0.09523809524 | 0.09523809524 | 0.1111111111 |  | 0.6842105263 | #DIV/0! |
| INC0083 | 0.09523809524 | 0.09523809524 | 0.1111111111 |  | 0.6842105263 | #DIV/0! |
| INC0083 | 0.09523809524 | 0.09523809524 | 0.2222222222 |  | 0.2894736842 | #DIV/0! |
| INC0083 | 0.1428571429  | 0.1428571429  | 0.0555555555 |  | 2.333333333  | #DIV/0! |
| INC0084 | 0.1428571429  | 0.1428571429  | 0.0555555555 |  | 2.333333333  | #DIV/0! |
| INC0084 | 0.1428571429  | 0.1428571429  | 0.0555555555 |  | 2.333333333  | #DIV/0! |
| INC0084 | 0.1428571429  | 0.1428571429  | 0.0555555555 |  | 2.333333333  | #DIV/0! |
| INC0084 | 0.04761904762 | 0.04761904762 | 0.0555555555 |  | 0.7          | #DIV/0! |
| INC0084 | 0.04761904762 | 0.04761904762 | 0.1111111111 |  | 0.325        | #DIV/0! |
| INC0084 | 0.09523809524 | 0.09523809524 | 0.0555555555 |  | 1.473684211  | #DIV/0! |
| INC0085 | 0.1904761905  | 0.1904761905  | 0.0555555555 |  | 3.294117647  | #DIV/0! |
| INC0085 | 0.09523809524 | 0.09523809524 | 0            |  | inf          | #DIV/0! |
| INC0085 | 0.04761904762 | 0.04761904762 | 0.0555555555 |  | 0.7          | #DIV/0! |
| INC0085 | 0.1428571429  | 0.1428571429  | 0.0555555555 |  | 2.333333333  | #DIV/0! |
| INC0085 | 0.1428571429  | 0.1428571429  | 0            |  | inf          | #DIV/0! |
| INC0085 | 0.1428571429  | 0.1428571429  | 0            |  | inf          | #DIV/0! |
| INC0086 | 0.1428571429  | 0.1428571429  | 0.1111111111 |  | 1.083333333  | #DIV/0! |
| INC0086 | 0.1428571429  | 0.1428571429  | 0            |  | inf          | #DIV/0! |
| INC0086 | 0.1428571429  | 0.1428571429  | 0.1111111111 |  | 1.083333333  | #DIV/0! |
| INC0086 | 0.1428571429  | 0.1428571429  | 0.1111111111 |  | 1.083333333  | #DIV/0! |
| INC0086 | 0.1428571429  | 0.1428571429  | 0            |  | inf          | #DIV/0! |
| INC0086 | 0.2380952381  | 0.2380952381  | 0            |  | inf          | #DIV/0! |
| INC0086 | 0.04761904762 | 0.04761904762 | 0            |  | inf          | #DIV/0! |
| INC0086 | 0.1428571429  | 0.1428571429  | 0.0555555555 |  | 2.333333333  | #DIV/0! |
| INC0087 | 0.04761904762 | 0.04761904762 | 0            |  | inf          | #DIV/0! |
| INC0087 | 0.04761904762 | 0.04761904762 | 0            |  | inf          | #DIV/0! |
| INC0087 | 0.04761904762 | 0.04761904762 | 0            |  | inf          | #DIV/0! |
| INC0087 | 0.04761904762 | 0.04761904762 | 0.0555555555 |  | 0.7          | #DIV/0! |
| INC0088 | 0.1428571429  | 0.1428571429  | 0.0555555555 |  | 2.333333333  | #DIV/0! |
| INC0088 | 0.1428571429  | 0.1428571429  | 0.0555555555 |  | 2.333333333  | #DIV/0! |
| INC0088 | 0.09523809524 | 0.09523809524 | 0.0555555555 |  | 1.473684211  | #DIV/0! |
| INC0088 | 0.09523809524 | 0.09523809524 | 0.0555555555 |  | 1.473684211  | #DIV/0! |

|         |               |               |               |  |              |         |
|---------|---------------|---------------|---------------|--|--------------|---------|
| INC0088 | 0.1428571429  | 0.1428571429  | 0.05555555556 |  | 2.333333333  | #DIV/0! |
| INC0088 | 0.1428571429  | 0.1428571429  | 0.05555555556 |  | 2.333333333  | #DIV/0! |
| INC0088 | 0.09523809524 | 0.09523809524 | 0.05555555556 |  | 1.473684211  | #DIV/0! |
| INC0088 | 0.1904761905  | 0.1904761905  | 0.05555555556 |  | 3.294117647  | #DIV/0! |
| INC0089 | 0.04761904762 | 0.04761904762 | 0.05555555556 |  | 0.7          | #DIV/0! |
| INC0089 | 0.04761904762 | 0.04761904762 | 0.05555555556 |  | 0.7          | #DIV/0! |
| INC0089 | 0.04761904762 | 0.04761904762 | 0.16666666667 |  | 0.2          | #DIV/0! |
| INC0089 | 0             | 0             | 0.1111111111  |  | 0            | #DIV/0! |
| INC0090 | 0.09523809524 | 0.09523809524 | 0.05555555556 |  | 1.473684211  | #DIV/0! |
| INC0090 | 0.09523809524 | 0.09523809524 | 0.05555555556 |  | 1.473684211  | #DIV/0! |
| INC0090 | 0.04761904762 | 0.04761904762 | 0.05555555556 |  | 0.7          | #DIV/0! |
| INC0090 | 0.1428571429  | 0.1428571429  | 0.1111111111  |  | 1.083333333  | #DIV/0! |
| INC0090 | 0.04761904762 | 0.04761904762 | 0.16666666667 |  | 0.2          | #DIV/0! |
| INC0090 | 0.04761904762 | 0.04761904762 | 0             |  | inf          | #DIV/0! |
| INC0090 | 0.09523809524 | 0.09523809524 | 0.05555555556 |  | 1.473684211  | #DIV/0! |
| INC0091 | 0.04761904762 | 0.04761904762 | 0             |  | inf          | #DIV/0! |
| INC0091 | 0.04761904762 | 0.04761904762 | 0             |  | inf          | #DIV/0! |
| INC0091 | 0.04761904762 | 0.04761904762 | 0             |  | inf          | #DIV/0! |
| INC0092 | 0.04761904762 | 0.04761904762 | 0             |  | inf          | #DIV/0! |
| INC0092 | 0.04761904762 | 0.04761904762 | 0.1111111111  |  | 0.325        | #DIV/0! |
| INC0092 | 0.04761904762 | 0.04761904762 | 0.05555555556 |  | 0.7          | #DIV/0! |
| INC0092 | 0.04761904762 | 0.04761904762 | 0.05555555556 |  | 0.7          | #DIV/0! |
| INC0092 | 0.04761904762 | 0.04761904762 | 0.05555555556 |  | 0.7          | #DIV/0! |
| INC0092 | 0.04761904762 | 0.04761904762 | 0.05555555556 |  | 0.7          | #DIV/0! |
| INC0092 | 0.04761904762 | 0.04761904762 | 0.05555555556 |  | 0.7          | #DIV/0! |
| INC0092 | 0.04761904762 | 0.04761904762 | 0.05555555556 |  | 0.7          | #DIV/0! |
| INC0092 | 0.04761904762 | 0.04761904762 | 0.05555555556 |  | 0.7          | #DIV/0! |
| INC0092 | 0.04761904762 | 0.04761904762 | 0.05555555556 |  | 0.7          | #DIV/0! |
| INC0092 | 0.04761904762 | 0.04761904762 | 0.05555555556 |  | 0.7          | #DIV/0! |
| INC0093 | 0.04761904762 | 0.04761904762 | 0.05555555556 |  | 0.7          | #DIV/0! |
| INC0093 | 0.04761904762 | 0.04761904762 | 0.05555555556 |  | 0.7          | #DIV/0! |
| INC0093 | 0             | 0             | 0.05555555556 |  | 0            | #DIV/0! |
| INC0093 | 0.04761904762 | 0.04761904762 | 0.1111111111  |  | 0.325        | #DIV/0! |
| INC0093 | 0.04761904762 | 0.04761904762 | 0.05555555556 |  | 0.7          | #DIV/0! |
| INC0093 | 0.09523809524 | 0.09523809524 | 0.05555555556 |  | 1.473684211  | #DIV/0! |
| INC0094 | 0.04761904762 | 0.04761904762 | 0.16666666667 |  | 0.2          | #DIV/0! |
| INC0094 | 0.04761904762 | 0.04761904762 | 0.05555555556 |  | 0.7          | #DIV/0! |
| INC0094 | 0.04761904762 | 0.04761904762 | 0.1111111111  |  | 0.325        | #DIV/0! |
| INC0094 | 0.09523809524 | 0.09523809524 | 0.05555555556 |  | 1.473684211  | #DIV/0! |
| INC0094 | 0.09523809524 | 0.09523809524 | 0.05555555556 |  | 1.473684211  | #DIV/0! |
| INC0094 | 0.04761904762 | 0.04761904762 | 0.1111111111  |  | 0.325        | #DIV/0! |
| INC0095 | 0.09523809524 | 0.09523809524 | 0.05555555556 |  | 1.473684211  | #DIV/0! |
| INC0095 | 0             | 0             | 0.05555555556 |  | 0            | #DIV/0! |
| INC0095 | 0             | 0             | 0.05555555556 |  | 0            | #DIV/0! |
| INC0095 | 0.04761904762 | 0.04761904762 | 0             |  | inf          | #DIV/0! |
| INC0095 | 0.04761904762 | 0.04761904762 | 0.16666666667 |  | 0.2          | #DIV/0! |
| INC0096 | 0.04761904762 | 0.04761904762 | 0             |  | inf          | #DIV/0! |
| INC0096 | 0.09523809524 | 0.09523809524 | 0.05555555556 |  | 1.473684211  | #DIV/0! |
| INC0096 | 0.1428571429  | 0.1428571429  | 0.1111111111  |  | 1.083333333  | #DIV/0! |
| INC0096 | 0.09523809524 | 0.09523809524 | 0.2222222222  |  | 0.2894736842 | #DIV/0! |
| INC0096 | 0.1428571429  | 0.1428571429  | 0.16666666667 |  | 0.6666666667 | #DIV/0! |
| INC0096 | 0.1428571429  | 0.1428571429  | 0.1111111111  |  | 1.083333333  | #DIV/0! |
| INC0097 | 0.1428571429  | 0.1428571429  | 0             |  | inf          | #DIV/0! |
| INC0097 | 0.04761904762 | 0.04761904762 | 0             |  | inf          | #DIV/0! |

|         |               |               |               |  |              |         |
|---------|---------------|---------------|---------------|--|--------------|---------|
| INC0097 | 0.09523809524 | 0.09523809524 | 0.1111111111  |  | 0.6842105263 | #DIV/0! |
| INC0097 | 0.09523809524 | 0.09523809524 | 0             |  | inf          | #DIV/0! |
| INC0097 | 0.09523809524 | 0.09523809524 | 0.1111111111  |  | 0.6842105263 | #DIV/0! |
| INC0097 | 0.09523809524 | 0.09523809524 | 0.1111111111  |  | 0.6842105263 | #DIV/0! |
| INC0098 | 0.04761904762 | 0.04761904762 | 0.1111111111  |  | 0.325        | #DIV/0! |
| INC0098 | 0.04761904762 | 0.04761904762 | 0.05555555556 |  | 0.7          | #DIV/0! |
| INC0099 | 0.04761904762 | 0.04761904762 | 0             |  | inf          | #DIV/0! |
| INC0099 | 0.09523809524 | 0.09523809524 | 0.1111111111  |  | 0.6842105263 | #DIV/0! |
| INC0099 | 0.04761904762 | 0.04761904762 | 0             |  | inf          | #DIV/0! |
| INC0099 | 0.09523809524 | 0.09523809524 | 0.05555555556 |  | 1.473684211  | #DIV/0! |
| INC0099 | 0.04761904762 | 0.04761904762 | 0.1666666667  |  | 0.2          | #DIV/0! |
| INC0099 | 0.09523809524 | 0.09523809524 | 0.1111111111  |  | 0.6842105263 | #DIV/0! |
| INC0100 | 0.04761904762 | 0.04761904762 | 0.05555555556 |  | 0.7          | #DIV/0! |
| INC0100 | 0.04761904762 | 0.04761904762 | 0             |  | inf          | #DIV/0! |
| INC0100 | 0.09523809524 | 0.09523809524 | 0.1111111111  |  | 0.6842105263 | #DIV/0! |
| INC0100 | 0.09523809524 | 0.09523809524 | 0.05555555556 |  | 1.473684211  | #DIV/0! |
| INC0100 | 0.04761904762 | 0.04761904762 | 0.05555555556 |  | 0.7          | #DIV/0! |
| INC0100 | 0.09523809524 | 0.09523809524 | 0.05555555556 |  | 1.473684211  | #DIV/0! |
| INC0100 | 0.1428571429  | 0.1428571429  | 0.05555555556 |  | 2.333333333  | #DIV/0! |
| INC0100 | 0.04761904762 | 0.04761904762 | 0.05555555556 |  | 0.7          | #DIV/0! |
| INC0101 | 0.1904761905  | 0.1904761905  | 0.05555555556 |  | 3.294117647  | #DIV/0! |
| INC0101 | 0.04761904762 | 0.04761904762 | 0             |  | inf          | #DIV/0! |
| INC0101 | 0             | 0             | 0.1111111111  |  | 0            | #DIV/0! |
| INC0101 | 0             | 0             | 0.05555555556 |  | 0            | #DIV/0! |
| INC0101 | 0             | 0             | 0.1111111111  |  | 0            | #DIV/0! |
| INC0102 | 0             | 0             | 0.1111111111  |  | 0            | #DIV/0! |
| INC0102 | 0.1428571429  | 0.1428571429  | 0.05555555556 |  | 2.333333333  | #DIV/0! |
| INC0102 | 0.04761904762 | 0.04761904762 | 0             |  | inf          | #DIV/0! |
| INC0102 | 0             | 0             | 0             |  |              | #DIV/0! |
| INC0102 | 0.04761904762 | 0.04761904762 | 0.05555555556 |  | 0.7          | #DIV/0! |
| INC0103 | 0.1904761905  | 0.1904761905  | 0.1111111111  |  | 1.529411765  | #DIV/0! |
| INC0103 | 0.1428571429  | 0.1428571429  | 0             |  | inf          | #DIV/0! |
| INC0103 | 0.1428571429  | 0.1428571429  | 0             |  | inf          | #DIV/0! |
| INC0103 | 0.04761904762 | 0.04761904762 | 0.05555555556 |  | 0.7          | #DIV/0! |
| INC0103 | 0.1428571429  | 0.1428571429  | 0             |  | inf          | #DIV/0! |
| INC0103 | 0.1428571429  | 0.1428571429  | 0             |  | inf          | #DIV/0! |
| INC0104 | 0.04761904762 | 0.04761904762 | 0             |  | inf          | #DIV/0! |
| INC0105 | 0.1428571429  | 0.1428571429  | 0.2222222222  |  | 0.4583333333 | #DIV/0! |
| INC0106 | 0             | 0             | 0.05555555556 |  | 0            | #DIV/0! |
| INC0106 | 0             | 0             | 0.05555555556 |  | 0            | #DIV/0! |
| INC0106 | 0.1428571429  | 0.1428571429  | 0.05555555556 |  | 2.333333333  | #DIV/0! |
| INC0107 | 0.04761904762 | 0.04761904762 | 0             |  | inf          | #DIV/0! |
| INC0108 | 0.04761904762 | 0.04761904762 | 0             |  | inf          | #DIV/0! |
| INC0108 | 0.04761904762 | 0.04761904762 | 0             |  | inf          | #DIV/0! |
| INC0108 | 0             | 0             | 0             |  |              | #DIV/0! |
| INC0108 | 0             | 0             | 0.05555555556 |  | 0            | #DIV/0! |
| INC0108 | 0.04761904762 | 0.04761904762 | 0.05555555556 |  | 0.7          | #DIV/0! |
| INC0108 | 0.04761904762 | 0.04761904762 | 0.1111111111  |  | 0.325        | #DIV/0! |
| INC0109 | 0             | 0             | 0.05555555556 |  | 0            | #DIV/0! |
| INC0109 | 0             | 0             | 0.05555555556 |  | 0            | #DIV/0! |
| INC0109 | 0             | 0             | 0.05555555556 |  | 0            | #DIV/0! |



|         |               |               |               |  |             |         |
|---------|---------------|---------------|---------------|--|-------------|---------|
| INC0109 | 0.04761904762 | 0.04761904762 | 0.05555555556 |  | 0.7         | #DIV/0! |
| INC0109 | 0             | 0             | 0.05555555556 |  | 0           | #DIV/0! |
| INC0109 | 0             | 0             | 0             |  |             | #DIV/0! |
| INC0109 | 0             | 0             | 0             |  |             | #DIV/0! |
| INC0109 | 0             | 0             | 0.05555555556 |  | 0           | #DIV/0! |
| INC0109 | 0             | 0             | 0.05555555556 |  | 0           | #DIV/0! |
| INC0110 | 0.1428571429  | 0.1428571429  | 0.05555555556 |  | 2.333333333 | #DIV/0! |
| INC0110 | 0             | 0             | 0.05555555556 |  | 0           | #DIV/0! |
| INC0110 | 0             | 0             | 0.05555555556 |  | 0           | #DIV/0! |
| INC0110 | 0             | 0             | 0.05555555556 |  | 0           | #DIV/0! |
| INC0110 | 0             | 0             | 0.05555555556 |  | 0           | #DIV/0! |
| INC0110 | 0             | 0             | 0.05555555556 |  | 0           | #DIV/0! |
| INC0110 | 0             | 0             | 0.05555555556 |  | 0           | #DIV/0! |
| INC0111 | 0.1904761905  | 0.1904761905  | 0.1111111111  |  | 1.529411765 | #DIV/0! |
| INC0111 | 0             | 0             | 0.05555555556 |  | 0           | #DIV/0! |
| INC0111 | 0             | 0             | 0.05555555556 |  | 0           | #DIV/0! |
| INC0111 | 0             | 0             | 0.1111111111  |  | 0           | #DIV/0! |
| INC0111 | 0             | 0             | 0.1111111111  |  | 0           | #DIV/0! |
| INC0111 | 0             | 0             | 0.05555555556 |  | 0           | #DIV/0! |
| INC0111 | 0             | 0             | 0.05555555556 |  | 0           | #DIV/0! |
| INC0112 | 0             | 0             | 0.05555555556 |  | 0           | #DIV/0! |
| INC0112 | 0             | 0             | 0.05555555556 |  | 0           | #DIV/0! |
| INC0112 | 0.04761904762 | 0.04761904762 | 0.05555555556 |  | 0.7         | #DIV/0! |
| INC0112 | 0             | 0             | 0.05555555556 |  | 0           | #DIV/0! |
| INC0112 | 0             | 0             | 0.05555555556 |  | 0           | #DIV/0! |
| INC0112 | 0             | 0             | 0.05555555556 |  | 0           | #DIV/0! |
| INC0112 | 0             | 0             | 0.05555555556 |  | 0           | #DIV/0! |
| INC0112 | 0             | 0             | 0.1111111111  |  | 0           | #DIV/0! |
| INC0113 | 0.09523809524 | 0.09523809524 | 0.05555555556 |  | 1.473684211 | #DIV/0! |
| INC0113 | 0.1428571429  | 0.1428571429  | 0             |  | inf         | #DIV/0! |
| INC0113 | 0             | 0             | 0             |  |             | #DIV/0! |
| INC0113 | 0.04761904762 | 0.04761904762 | 0.05555555556 |  | 0.7         | #DIV/0! |
| INC0113 | 0.1428571429  | 0.1428571429  | 0             |  | inf         | #DIV/0! |
| INC0113 | 0.04761904762 | 0.04761904762 | 0.05555555556 |  | 0.7         | #DIV/0! |
| INC0113 | 0.09523809524 | 0.09523809524 | 0.05555555556 |  | 1.473684211 | #DIV/0! |
| INC0113 | 0.1428571429  | 0.1428571429  | 0             |  | inf         | #DIV/0! |
| INC0114 | 0.04761904762 | 0.04761904762 | 0.05555555556 |  | 0.7         | #DIV/0! |
| INC0114 | 0.04761904762 | 0.04761904762 | 0.1111111111  |  | 0.325       | #DIV/0! |
| INC0114 | 0.1428571429  | 0.1428571429  | 0.05555555556 |  | 2.333333333 | #DIV/0! |
| INC0114 | 0             | 0             | 0.05555555556 |  | 0           | #DIV/0! |
| INC0114 | 0.04761904762 | 0.04761904762 | 0.05555555556 |  | 0.7         | #DIV/0! |
| INC0114 | 0.1428571429  | 0.1428571429  | 0.05555555556 |  | 2.333333333 | #DIV/0! |
| INC0114 | 0.04761904762 | 0.04761904762 | 0             |  | inf         | #DIV/0! |
| INC0115 | 0.04761904762 | 0.04761904762 | 0             |  | inf         | #DIV/0! |
| INC0115 | 0.1428571429  | 0.1428571429  | 0.1111111111  |  | 1.083333333 | #DIV/0! |
| INC0115 | 0             | 0             | 0             |  |             | #DIV/0! |
| INC0115 | 0             | 0             | 0.05555555556 |  | 0           | #DIV/0! |
| INC0116 | 0.04761904762 | 0.04761904762 | 0             |  | inf         | #DIV/0! |
| INC0116 | 0.04761904762 | 0.04761904762 | 0.1666666667  |  | 0.2         | #DIV/0! |
| INC0116 | 0.2857142857  | 0.2857142857  | 0             |  | inf         | #DIV/0! |
| INC0116 | 0.2857142857  | 0.2857142857  | 0             |  | inf         | #DIV/0! |

|         |               |               |               |  |             |         |
|---------|---------------|---------------|---------------|--|-------------|---------|
| INC0116 | 0.1904761905  | 0.1904761905  | 0             |  | inf         | #DIV/0! |
| INC0116 | 0.1904761905  | 0.1904761905  | 0             |  | inf         | #DIV/0! |
| INC0116 | 0.1904761905  | 0.1904761905  | 0             |  | inf         | #DIV/0! |
| INC0116 | 0.04761904762 | 0.04761904762 | 0.05555555556 |  | 0.7         | #DIV/0! |
| INC0117 | 0.04761904762 | 0.04761904762 | 0             |  | inf         | #DIV/0! |
| INC0117 | 0             | 0             | 0.05555555556 |  | 0           | #DIV/0! |
| INC0117 | 0.04761904762 | 0.04761904762 | 0.16666666667 |  | 0.2         | #DIV/0! |
| INC0117 | 0.04761904762 | 0.04761904762 | 0             |  | inf         | #DIV/0! |
| INC0117 | 0             | 0             | 0.11111111111 |  | 0           | #DIV/0! |
| INC0118 | 0.09523809524 | 0.09523809524 | 0             |  | inf         | #DIV/0! |
| INC0118 | 0.1904761905  | 0.1904761905  | 0.11111111111 |  | 1.529411765 | #DIV/0! |
| INC0118 | 0             | 0             | 0             |  |             | #DIV/0! |
| INC0118 | 0.04761904762 | 0.04761904762 | 0             |  | inf         | #DIV/0! |
| INC0118 | 0.09523809524 | 0.09523809524 | 0.05555555556 |  | 1.473684211 | #DIV/0! |
| INC0118 | 0             | 0             | 0.05555555556 |  | 0           | #DIV/0! |
| INC0118 | 0.1428571429  | 0.1428571429  | 0.05555555556 |  | 2.333333333 | #DIV/0! |
| INC0119 | 0             | 0             | 0.05555555556 |  | 0           | #DIV/0! |
| INC0119 | 0.1428571429  | 0.1428571429  | 0.05555555556 |  | 2.333333333 | #DIV/0! |
| INC0119 | 0.2857142857  | 0.2857142857  | 0.11111111111 |  | 2.6         | #DIV/0! |
| INC0119 | 0.04761904762 | 0.04761904762 | 0.05555555556 |  | 0.7         | #DIV/0! |
| INC0119 | 0.04761904762 | 0.04761904762 | 0             |  | inf         | #DIV/0! |
| INC0119 | 0.04761904762 | 0.04761904762 | 0.05555555556 |  | 0.7         | #DIV/0! |
| INC0120 | 0.04761904762 | 0.04761904762 | 0.05555555556 |  | 0.7         | #DIV/0! |
| INC0120 | 0.1428571429  | 0.1428571429  | 0.05555555556 |  | 2.333333333 | #DIV/0! |
| INC0120 | 0.1428571429  | 0.1428571429  | 0.05555555556 |  | 2.333333333 | #DIV/0! |
| INC0120 | 0.1904761905  | 0.1904761905  | 0.05555555556 |  | 3.294117647 | #DIV/0! |
| INC0120 | 0.1904761905  | 0.1904761905  | 0.05555555556 |  | 3.294117647 | #DIV/0! |
| INC0121 | 0.1428571429  | 0.1428571429  | 0.05555555556 |  | 2.333333333 | #DIV/0! |
| INC0121 | 0.1904761905  | 0.1904761905  | 0.11111111111 |  | 1.529411765 | #DIV/0! |
| INC0121 | 0.1904761905  | 0.1904761905  | 0.11111111111 |  | 1.529411765 | #DIV/0! |
| INC0121 | 0.09523809524 | 0.09523809524 | 0.05555555556 |  | 1.473684211 | #DIV/0! |
| INC0121 | 0             | 0             | 0.05555555556 |  | 0           | #DIV/0! |
| INC0121 | 0.04761904762 | 0.04761904762 | 0             |  | inf         | #DIV/0! |
| INC0122 | 0.1428571429  | 0.1428571429  | 0.11111111111 |  | 1.083333333 | #DIV/0! |
| INC0122 | 0.1428571429  | 0.1428571429  | 0.11111111111 |  | 1.083333333 | #DIV/0! |
| INC0122 | 0.09523809524 | 0.09523809524 | 0             |  | inf         | #DIV/0! |
| INC0122 | 0.04761904762 | 0.04761904762 | 0.11111111111 |  | 0.325       | #DIV/0! |
| INC0122 | 0.04761904762 | 0.04761904762 | 0.11111111111 |  | 0.325       | #DIV/0! |
| INC0122 | 0.09523809524 | 0.09523809524 | 0             |  | inf         | #DIV/0! |
| INC0122 | 0.09523809524 | 0.09523809524 | 0             |  | inf         | #DIV/0! |
| INC0123 | 0.04761904762 | 0.04761904762 | 0.05555555556 |  | 0.7         | #DIV/0! |
| INC0123 | 0.04761904762 | 0.04761904762 | 0.05555555556 |  | 0.7         | #DIV/0! |
| INC0123 | 0.09523809524 | 0.09523809524 | 0             |  | inf         | #DIV/0! |
| INC0123 | 0             | 0             | 0.05555555556 |  | 0           | #DIV/0! |
| INC0123 | 0.09523809524 | 0.09523809524 | 0.05555555556 |  | 1.473684211 | #DIV/0! |
| INC0123 | 0             | 0             | 0.05555555556 |  | 0           | #DIV/0! |
| INC0123 | 0             | 0             | 0.05555555556 |  | 0           | #DIV/0! |
| INC0123 | 0.09523809524 | 0.09523809524 | 0.05555555556 |  | 1.473684211 | #DIV/0! |
| INC0124 | 0.04761904762 | 0.04761904762 | 0.05555555556 |  | 0.7         | #DIV/0! |
| INC0124 | 0.09523809524 | 0.09523809524 | 0.05555555556 |  | 1.473684211 | #DIV/0! |
| INC0124 | 0.09523809524 | 0.09523809524 | 0.05555555556 |  | 1.473684211 | #DIV/0! |

|         |               |               |                |  |              |         |
|---------|---------------|---------------|----------------|--|--------------|---------|
| INC0124 | 0             | 0             | 0.055555555556 |  | 0            | #DIV/0! |
| INC0124 | 0             | 0             | 0.055555555556 |  | 0            | #DIV/0! |
| INC0124 | 0             | 0             | 0.055555555556 |  | 0            | #DIV/0! |
| INC0124 | 0             | 0             | 0.055555555556 |  | 0            | #DIV/0! |
| INC0125 | 0             | 0             | 0.055555555556 |  | 0            | #DIV/0! |
| INC0125 | 0.09523809524 | 0.09523809524 | 0.055555555556 |  | 1.473684211  | #DIV/0! |
| INC0125 | 0.04761904762 | 0.04761904762 | 0.1111111111   |  | 0.325        | #DIV/0! |
| INC0125 | 0.09523809524 | 0.09523809524 | 0.055555555556 |  | 1.473684211  | #DIV/0! |
| INC0125 | 0.09523809524 | 0.09523809524 | 0              |  | inf          | #DIV/0! |
| INC0125 | 0             | 0             | 0.055555555556 |  | 0            | #DIV/0! |
| INC0125 | 0.09523809524 | 0.09523809524 | 0.055555555556 |  | 1.473684211  | #DIV/0! |
| INC0125 | 0.04761904762 | 0.04761904762 | 0              |  | inf          | #DIV/0! |
| INC0125 | 0.04761904762 | 0.04761904762 | 0              |  | inf          | #DIV/0! |
| INC0126 | 0.1428571429  | 0.1428571429  | 0.1666666667   |  | 0.6666666667 | #DIV/0! |
| INC0126 | 0.04761904762 | 0.04761904762 | 0.055555555556 |  | 0.7          | #DIV/0! |
| INC0126 | 0.1428571429  | 0.1428571429  | 0.055555555556 |  | 2.333333333  | #DIV/0! |
| INC0126 | 0.04761904762 | 0.04761904762 | 0.055555555556 |  | 0.7          | #DIV/0! |
| INC0126 | 0.04761904762 | 0.04761904762 | 0              |  | inf          | #DIV/0! |
| INC0126 | 0.04761904762 | 0.04761904762 | 0              |  | inf          | #DIV/0! |
| INC0127 | 0.09523809524 | 0.09523809524 | 0.1666666667   |  | 0.4210526316 | #DIV/0! |
| INC0127 | 0.09523809524 | 0.09523809524 | 0.1666666667   |  | 0.4210526316 | #DIV/0! |
| INC0127 | 0.09523809524 | 0.09523809524 | 0.1666666667   |  | 0.4210526316 | #DIV/0! |
| INC0127 | 0             | 0             | 0.055555555556 |  | 0            | #DIV/0! |
| INC0127 | 0.09523809524 | 0.09523809524 | 0.055555555556 |  | 1.473684211  | #DIV/0! |
| INC0128 | 0             | 0             | 0.055555555556 |  | 0            | #DIV/0! |
| INC0128 | 0.1428571429  | 0.1428571429  | 0.055555555556 |  | 2.333333333  | #DIV/0! |
| INC0128 | 0.04761904762 | 0.04761904762 | 0.1111111111   |  | 0.325        | #DIV/0! |
| INC0128 | 0.1428571429  | 0.1428571429  | 0.1666666667   |  | 0.6666666667 | #DIV/0! |
| INC0129 | 0.04761904762 | 0.04761904762 | 0              |  | inf          | #DIV/0! |
| INC0129 | 0             | 0             | 0.055555555556 |  | 0            | #DIV/0! |
| INC0129 | 0.09523809524 | 0.09523809524 | 0.055555555556 |  | 1.473684211  | #DIV/0! |
| INC0129 | 0.1904761905  | 0.1904761905  | 0.1111111111   |  | 1.529411765  | #DIV/0! |
| INC0129 | 0.1428571429  | 0.1428571429  | 0.1666666667   |  | 0.6666666667 | #DIV/0! |
| INC0130 | 0.04761904762 | 0.04761904762 | 0.2222222222   |  | 0.1375       | #DIV/0! |
| INC0130 | 0.1428571429  | 0.1428571429  | 0.1666666667   |  | 0.6666666667 | #DIV/0! |
| INC0130 | 0             | 0             | 0.055555555556 |  | 0            | #DIV/0! |
| INC0130 | 0             | 0             | 0.1111111111   |  | 0            | #DIV/0! |
| INC0130 | 0.04761904762 | 0.04761904762 | 0.055555555556 |  | 0.7          | #DIV/0! |
| INC0130 | 0.04761904762 | 0.04761904762 | 0.1666666667   |  | 0.2          | #DIV/0! |
| INC0130 | 0.04761904762 | 0.04761904762 | 0.055555555556 |  | 0.7          | #DIV/0! |
| INC0131 | 0             | 0             | 0.1111111111   |  | 0            | #DIV/0! |
| INC0132 | 0.1428571429  | 0.1428571429  | 0.055555555556 |  | 2.333333333  | #DIV/0! |
| INC0132 | 0.1428571429  | 0.1428571429  | 0.055555555556 |  | 2.333333333  | #DIV/0! |
| INC0132 | 0.1428571429  | 0.1428571429  | 0.055555555556 |  | 2.333333333  | #DIV/0! |
| INC0133 | 0             | 0             | 0.055555555556 |  | 0            | #DIV/0! |
| INC0133 | 0             | 0             | 0.055555555556 |  | 0            | #DIV/0! |
| INC0133 | 0             | 0             | 0.055555555556 |  | 0            | #DIV/0! |
| INC0133 | 0.04761904762 | 0.04761904762 | 0              |  | inf          | #DIV/0! |
| INC0133 | 0.04761904762 | 0.04761904762 | 0.055555555556 |  | 0.7          | #DIV/0! |
| INC0133 | 0.04761904762 | 0.04761904762 | 0              |  | inf          | #DIV/0! |
| INC0134 | 0.04761904762 | 0.04761904762 | 0              |  | inf          | #DIV/0! |

|         |               |               |               |  |              |         |
|---------|---------------|---------------|---------------|--|--------------|---------|
| INC0134 | 0.1428571429  | 0.1428571429  | 0.05555555556 |  | 2.333333333  | #DIV/0! |
| INC0134 | 0             | 0             | 0.1111111111  |  | 0            | #DIV/0! |
| INC0134 | 0.04761904762 | 0.04761904762 | 0.05555555556 |  | 0.7          | #DIV/0! |
| INC0134 | 0.1428571429  | 0.1428571429  | 0             |  | inf          | #DIV/0! |
| INC0134 | 0             | 0             | 0.05555555556 |  | 0            | #DIV/0! |
| INC0134 | 0             | 0             | 0.05555555556 |  | 0            | #DIV/0! |
| INC0134 | 0.1428571429  | 0.1428571429  | 0             |  | inf          | #DIV/0! |
| INC0134 | 0.04761904762 | 0.04761904762 | 0.05555555556 |  | 0.7          | #DIV/0! |
| INC0135 | 0.1428571429  | 0.1428571429  | 0.05555555556 |  | 2.333333333  | #DIV/0! |
| INC0135 | 0.1428571429  | 0.1428571429  | 0             |  | inf          | #DIV/0! |
| INC0135 | 0.1428571429  | 0.1428571429  | 0.05555555556 |  | 2.333333333  | #DIV/0! |
| INC0135 | 0.1428571429  | 0.1428571429  | 0             |  | inf          | #DIV/0! |
| INC0135 | 0.09523809524 | 0.09523809524 | 0.05555555556 |  | 1.473684211  | #DIV/0! |
| INC0135 | 0.04761904762 | 0.04761904762 | 0.1111111111  |  | 0.325        | #DIV/0! |
| INC0135 | 0.04761904762 | 0.04761904762 | 0.05555555556 |  | 0.7          | #DIV/0! |
| INC0135 | 0.04761904762 | 0.04761904762 | 0.05555555556 |  | 0.7          | #DIV/0! |
| INC0135 | 0.04761904762 | 0.04761904762 | 0.05555555556 |  | 0.7          | #DIV/0! |
| INC0136 | 0.04761904762 | 0.04761904762 | 0.05555555556 |  | 0.7          | #DIV/0! |
| INC0136 | 0.04761904762 | 0.04761904762 | 0.05555555556 |  | 0.7          | #DIV/0! |
| INC0136 | 0.04761904762 | 0.04761904762 | 0.05555555556 |  | 0.7          | #DIV/0! |
| INC0136 | 0.1428571429  | 0.1428571429  | 0             |  | inf          | #DIV/0! |
| INC0136 | 0.04761904762 | 0.04761904762 | 0.05555555556 |  | 0.7          | #DIV/0! |
| INC0136 | 0             | 0             | 0.05555555556 |  | 0            | #DIV/0! |
| INC0136 | 0             | 0             | 0.05555555556 |  | 0            | #DIV/0! |
| INC0137 | 0.1428571429  | 0.1428571429  | 0.1666666667  |  | 0.6666666667 | #DIV/0! |
| INC0137 | 0.04761904762 | 0.04761904762 | 0.05555555556 |  | 0.7          | #DIV/0! |
| INC0137 | 0.1428571429  | 0.1428571429  | 0.1111111111  |  | 1.083333333  | #DIV/0! |
| INC0137 | 0.1428571429  | 0.1428571429  | 0.1111111111  |  | 1.083333333  | #DIV/0! |
| INC0137 | 0             | 0             | 0.05555555556 |  | 0            | #DIV/0! |
| INC0137 | 0             | 0             | 0.1111111111  |  | 0            | #DIV/0! |
| INC0137 | 0             | 0             | 0.05555555556 |  | 0            | #DIV/0! |
| INC0138 | 0             | 0             | 0.05555555556 |  | 0            | #DIV/0! |
| INC0138 | 0.09523809524 | 0.09523809524 | 0             |  | inf          | #DIV/0! |
| INC0138 | 0             | 0             | 0.05555555556 |  | 0            | #DIV/0! |
| INC0139 | 0.1428571429  | 0.1428571429  | 0.05555555556 |  | 2.333333333  | #DIV/0! |
| INC0139 | 0.04761904762 | 0.04761904762 | 0.1111111111  |  | 0.325        | #DIV/0! |
| INC0139 | 0.04761904762 | 0.04761904762 | 0.1111111111  |  | 0.325        | #DIV/0! |
| INC0139 | 0.04761904762 | 0.04761904762 | 0             |  | inf          | #DIV/0! |
| INC0139 | 0.04761904762 | 0.04761904762 | 0.05555555556 |  | 0.7          | #DIV/0! |
| INC0139 | 0             | 0             | 0.1666666667  |  | 0            | #DIV/0! |
| INC0140 | 0             | 0             | 0.1111111111  |  | 0            | #DIV/0! |
| INC0141 | 0.09523809524 | 0.09523809524 | 0.2222222222  |  | 0.2894736842 | #DIV/0! |
| INC0141 | 0             | 0             | 0.05555555556 |  | 0            | #DIV/0! |
| INC0141 | 0             | 0             | 0.05555555556 |  | 0            | #DIV/0! |
| INC0141 | 0.04761904762 | 0.04761904762 | 0.05555555556 |  | 0.7          | #DIV/0! |
| INC0141 | 0.1428571429  | 0.1428571429  | 0.1666666667  |  | 0.6666666667 | #DIV/0! |
| INC0141 | 0.09523809524 | 0.09523809524 | 0             |  | inf          | #DIV/0! |
| INC0141 | 0.09523809524 | 0.09523809524 | 0             |  | inf          | #DIV/0! |
| INC0141 | 0.1428571429  | 0.1428571429  | 0.1111111111  |  | 1.083333333  | #DIV/0! |
| INC0142 | 0.04761904762 | 0.04761904762 | 0.05555555556 |  | 0.7          | #DIV/0! |
| INC0142 | 0.04761904762 | 0.04761904762 | 0.1111111111  |  | 0.325        | #DIV/0! |

|         |               |               |              |  |              |         |
|---------|---------------|---------------|--------------|--|--------------|---------|
| INC0142 | 0.04761904762 | 0.04761904762 | 0.1111111111 |  | 0.325        | #DIV/0! |
| INC0142 | 0.04761904762 | 0.04761904762 | 0.1111111111 |  | 0.325        | #DIV/0! |
| INC0142 | 0.04761904762 | 0.04761904762 | 0.1666666667 |  | 0.2          | #DIV/0! |
| INC0142 | 0.1904761905  | 0.1904761905  | 0.0555555556 |  | 3.294117647  | #DIV/0! |
| INC0142 | 0.1904761905  | 0.1904761905  | 0.1111111111 |  | 1.529411765  | #DIV/0! |
| INC0142 | 0.09523809524 | 0.09523809524 | 0.1111111111 |  | 0.6842105263 | #DIV/0! |
| INC0143 | 0.1428571429  | 0.1428571429  | 0.1666666667 |  | 0.6666666667 | #DIV/0! |
| INC0143 | 0.1904761905  | 0.1904761905  | 0.0555555556 |  | 3.294117647  | #DIV/0! |
| INC0143 | 0.1904761905  | 0.1904761905  | 0.0555555556 |  | 3.294117647  | #DIV/0! |
| INC0143 | 0.1904761905  | 0.1904761905  | 0.0555555556 |  | 3.294117647  | #DIV/0! |
| INC0143 | 0.1904761905  | 0.1904761905  | 0            |  | inf          | #DIV/0! |
| INC0143 | 0.04761904762 | 0.04761904762 | 0.1666666667 |  | 0.2          | #DIV/0! |
| INC0144 | 0.09523809524 | 0.09523809524 | 0.1666666667 |  | 0.4210526316 | #DIV/0! |
| INC0144 | 0.09523809524 | 0.09523809524 | 0.1666666667 |  | 0.4210526316 | #DIV/0! |
| INC0144 | 0.09523809524 | 0.09523809524 | 0.0555555556 |  | 1.473684211  | #DIV/0! |
| INC0144 | 0.09523809524 | 0.09523809524 | 0.0555555556 |  | 1.473684211  | #DIV/0! |
| INC0144 | 0.3333333333  | 0.3333333333  | 0.1666666667 |  | 2            | #DIV/0! |
| INC0144 | 0.1428571429  | 0.1428571429  | 0.1666666667 |  | 0.6666666667 | #DIV/0! |
| INC0144 | 0.04761904762 | 0.04761904762 | 0.2222222222 |  | 0.1375       | #DIV/0! |
| INC0144 | 0.09523809524 | 0.09523809524 | 0.2222222222 |  | 0.2894736842 | #DIV/0! |
| INC0144 | 0.04761904762 | 0.04761904762 | 0.2222222222 |  | 0.1375       | #DIV/0! |
| INC0145 | 0.04761904762 | 0.04761904762 | 0.2222222222 |  | 0.1375       | #DIV/0! |
| INC0145 | 0.1428571429  | 0.1428571429  | 0.0555555556 |  | 2.333333333  | #DIV/0! |
| INC0145 | 0.04761904762 | 0.04761904762 | 0            |  | inf          | #DIV/0! |
| INC0146 | 0             | 0             | 0.0555555556 |  | 0            | #DIV/0! |
| INC0146 | 0.04761904762 | 0.04761904762 | 0.0555555556 |  | 0.7          | #DIV/0! |
| INC0146 | 0.09523809524 | 0.09523809524 | 0            |  | inf          | #DIV/0! |
| INC0147 | 0.09523809524 | 0.09523809524 | 0.0555555556 |  | 1.473684211  | #DIV/0! |
| INC0147 | 0             | 0             | 0.0555555556 |  | 0            | #DIV/0! |
| INC0147 | 0             | 0             | 0.0555555556 |  | 0            | #DIV/0! |
| INC0147 | 0.1428571429  | 0.1428571429  | 0            |  | inf          | #DIV/0! |
| INC0147 | 0.1428571429  | 0.1428571429  | 0            |  | inf          | #DIV/0! |
| INC0147 | 0.04761904762 | 0.04761904762 | 0            |  | inf          | #DIV/0! |
| INC0147 | 0.04761904762 | 0.04761904762 | 0            |  | inf          | #DIV/0! |
| INC0147 | 0.09523809524 | 0.09523809524 | 0.0555555556 |  | 1.473684211  | #DIV/0! |
| INC0148 | 0.04761904762 | 0.04761904762 | 0.0555555556 |  | 0.7          | #DIV/0! |
| INC0148 | 0.09523809524 | 0.09523809524 | 0.1111111111 |  | 0.6842105263 | #DIV/0! |
| INC0148 | 0             | 0             | 0            |  |              | #DIV/0! |
| INC0148 | 0             | 0             | 0            |  |              | #DIV/0! |
| INC0148 | 0             | 0             | 0.0555555556 |  | 0            | #DIV/0! |
| INC0148 | 0             | 0             | 0.0555555556 |  | 0            | #DIV/0! |
| INC0148 | 0             | 0             | 0.0555555556 |  | 0            | #DIV/0! |
| INC0148 | 0.1904761905  | 0.1904761905  | 0.0555555556 |  | 3.294117647  | #DIV/0! |
| INC0148 | 0.04761904762 | 0.04761904762 | 0.1111111111 |  | 0.325        | #DIV/0! |
| INC0149 | 0.04761904762 | 0.04761904762 | 0.0555555556 |  | 0.7          | #DIV/0! |
| INC0149 | 0.04761904762 | 0.04761904762 | 0.0555555556 |  | 0.7          | #DIV/0! |
| INC0149 | 0.04761904762 | 0.04761904762 | 0            |  | inf          | #DIV/0! |
| INC0149 | 0.04761904762 | 0.04761904762 | 0            |  | inf          | #DIV/0! |
| INC0149 | 0             | 0             | 0.0555555556 |  | 0            | #DIV/0! |
| INC0149 | 0             | 0             | 0            |  |              | #DIV/0! |
| INC0149 | 0.04761904762 | 0.04761904762 | 0.0555555556 |  | 0.7          | #DIV/0! |

|         |               |               |               |  |              |         |
|---------|---------------|---------------|---------------|--|--------------|---------|
| INC0150 | 0.04761904762 | 0.04761904762 | 0.05555555556 |  | 0.7          | #DIV/0! |
| INC0150 | 0.04761904762 | 0.04761904762 | 0             |  | inf          | #DIV/0! |
| INC0150 | 0.09523809524 | 0.09523809524 | 0.05555555556 |  | 1.473684211  | #DIV/0! |
| INC0150 | 0             | 0             | 0.05555555556 |  | 0            | #DIV/0! |
| INC0150 | 0.04761904762 | 0.04761904762 | 0.05555555556 |  | 0.7          | #DIV/0! |
| INC0150 | 0             | 0             | 0.05555555556 |  | 0            | #DIV/0! |
| INC0150 | 0             | 0             | 0.05555555556 |  | 0            | #DIV/0! |
| INC0150 | 0.04761904762 | 0.04761904762 | 0.05555555556 |  | 0.7          | #DIV/0! |
| INC0150 | 0.04761904762 | 0.04761904762 | 0.05555555556 |  | 0.7          | #DIV/0! |
| INC0150 | 0.04761904762 | 0.04761904762 | 0.16666666667 |  | 0.2          | #DIV/0! |
| INC0151 | 0             | 0             | 0.11111111111 |  | 0            | #DIV/0! |
| INC0151 | 0.04761904762 | 0.04761904762 | 0.05555555556 |  | 0.7          | #DIV/0! |
| INC0151 | 0.1428571429  | 0.1428571429  | 0             |  | inf          | #DIV/0! |
| INC0151 | 0.1428571429  | 0.1428571429  | 0             |  | inf          | #DIV/0! |
| INC0151 | 0.09523809524 | 0.09523809524 | 0.11111111111 |  | 0.6842105263 | #DIV/0! |
| INC0151 | 0.09523809524 | 0.09523809524 | 0.11111111111 |  | 0.6842105263 | #DIV/0! |
| INC0151 | 0.1428571429  | 0.1428571429  | 0.05555555556 |  | 2.333333333  | #DIV/0! |
| INC0151 | 0.1428571429  | 0.1428571429  | 0             |  | inf          | #DIV/0! |
| INC0152 | 0.1428571429  | 0.1428571429  | 0             |  | inf          | #DIV/0! |
| INC0152 | 0.04761904762 | 0.04761904762 | 0.11111111111 |  | 0.325        | #DIV/0! |
| INC0152 | 0.1428571429  | 0.1428571429  | 0.16666666667 |  | 0.6666666667 | #DIV/0! |
| INC0152 | 0.1428571429  | 0.1428571429  | 0.16666666667 |  | 0.6666666667 | #DIV/0! |
| INC0152 | 0.09523809524 | 0.09523809524 | 0.11111111111 |  | 0.6842105263 | #DIV/0! |
| INC0152 | 0.04761904762 | 0.04761904762 | 0.05555555556 |  | 0.7          | #DIV/0! |
| INC0152 | 0.04761904762 | 0.04761904762 | 0.05555555556 |  | 0.7          | #DIV/0! |
| INC0153 | 0.04761904762 | 0.04761904762 | 0.05555555556 |  | 0.7          | #DIV/0! |
| INC0153 | 0.04761904762 | 0.04761904762 | 0.16666666667 |  | 0.2          | #DIV/0! |
| INC0153 | 0.04761904762 | 0.04761904762 | 0.05555555556 |  | 0.7          | #DIV/0! |
| INC0153 | 0.04761904762 | 0.04761904762 | 0.05555555556 |  | 0.7          | #DIV/0! |
| INC0153 | 0.04761904762 | 0.04761904762 | 0             |  | inf          | #DIV/0! |
| INC0153 | 0.09523809524 | 0.09523809524 | 0             |  | inf          | #DIV/0! |
| INC0154 | 0.09523809524 | 0.09523809524 | 0.05555555556 |  | 1.473684211  | #DIV/0! |
| INC0154 | 0.09523809524 | 0.09523809524 | 0             |  | inf          | #DIV/0! |
| INC0154 | 0.04761904762 | 0.04761904762 | 0.11111111111 |  | 0.325        | #DIV/0! |
| INC0154 | 0.04761904762 | 0.04761904762 | 0.11111111111 |  | 0.325        | #DIV/0! |
| INC0154 | 0.04761904762 | 0.04761904762 | 0.11111111111 |  | 0.325        | #DIV/0! |
| INC0155 | 0.04761904762 | 0.04761904762 | 0.05555555556 |  | 0.7          | #DIV/0! |
| INC0155 | 0.04761904762 | 0.04761904762 | 0             |  | inf          | #DIV/0! |
| INC0155 | 0.04761904762 | 0.04761904762 | 0.05555555556 |  | 0.7          | #DIV/0! |
| INC0155 | 0.04761904762 | 0.04761904762 | 0.05555555556 |  | 0.7          | #DIV/0! |
| INC0156 | 0.2380952381  | 0.2380952381  | 0             |  | inf          | #DIV/0! |
| INC0156 | 0.04761904762 | 0.04761904762 | 0.05555555556 |  | 0.7          | #DIV/0! |
| INC0156 | 0.09523809524 | 0.09523809524 | 0.05555555556 |  | 1.473684211  | #DIV/0! |
| INC0156 | 0.04761904762 | 0.04761904762 | 0             |  | inf          | #DIV/0! |
| INC0156 | 0.09523809524 | 0.09523809524 | 0.05555555556 |  | 1.473684211  | #DIV/0! |
| INC0156 | 0.04761904762 | 0.04761904762 | 0             |  | inf          | #DIV/0! |
| INC0156 | 0.04761904762 | 0.04761904762 | 0             |  | inf          | #DIV/0! |
| INC0156 | 0.04761904762 | 0.04761904762 | 0             |  | inf          | #DIV/0! |
| INC0156 | 0.04761904762 | 0.04761904762 | 0             |  | inf          | #DIV/0! |
| INC0156 | 0.04761904762 | 0.04761904762 | 0             |  | inf          | #DIV/0! |
| INC0157 | 0.04761904762 | 0.04761904762 | 0             |  | inf          | #DIV/0! |

|         |               |               |               |  |              |         |
|---------|---------------|---------------|---------------|--|--------------|---------|
| INC0157 | 0.04761904762 | 0.04761904762 | 0             |  | inf          | #DIV/0! |
| INC0157 | 0.04761904762 | 0.04761904762 | 0             |  | inf          | #DIV/0! |
| INC0157 | 0.09523809524 | 0.09523809524 | 0.05555555556 |  | 1.473684211  | #DIV/0! |
| INC0157 | 0.04761904762 | 0.04761904762 | 0.05555555556 |  | 0.7          | #DIV/0! |
| INC0157 | 0.04761904762 | 0.04761904762 | 0.05555555556 |  | 0.7          | #DIV/0! |
| INC0158 | 0.04761904762 | 0.04761904762 | 0.05555555556 |  | 0.7          | #DIV/0! |
| INC0158 | 0.04761904762 | 0.04761904762 | 0.05555555556 |  | 0.7          | #DIV/0! |
| INC0158 | 0.04761904762 | 0.04761904762 | 0.05555555556 |  | 0.7          | #DIV/0! |
| INC0158 | 0.04761904762 | 0.04761904762 | 0.05555555556 |  | 0.7          | #DIV/0! |
| INC0158 | 0.09523809524 | 0.09523809524 | 0.05555555556 |  | 1.473684211  | #DIV/0! |
| INC0158 | 0.04761904762 | 0.04761904762 | 0.05555555556 |  | 0.7          | #DIV/0! |
| INC0158 | 0.04761904762 | 0.04761904762 | 0.05555555556 |  | 0.7          | #DIV/0! |
| INC0158 | 0.04761904762 | 0.04761904762 | 0             |  | inf          | #DIV/0! |
| INC0158 | 0             | 0             | 0.1111111111  |  | 0            | #DIV/0! |
| INC0159 | 0.04761904762 | 0.04761904762 | 0.2222222222  |  | 0.1375       | #DIV/0! |
| INC0159 | 0.1428571429  | 0.1428571429  | 0.1666666667  |  | 0.6666666667 | #DIV/0! |
| INC0159 | 0             | 0             | 0.05555555556 |  | 0            | #DIV/0! |
| INC0159 | 0             | 0             | 0.05555555556 |  | 0            | #DIV/0! |
| INC0159 | 0.04761904762 | 0.04761904762 | 0.05555555556 |  | 0.7          | #DIV/0! |
| INC0159 | 0.09523809524 | 0.09523809524 | 0.05555555556 |  | 1.473684211  | #DIV/0! |
| INC0159 | 0.04761904762 | 0.04761904762 | 0             |  | inf          | #DIV/0! |
| INC0160 | 0.04761904762 | 0.04761904762 | 0             |  | inf          | #DIV/0! |
| INC0160 | 0.1428571429  | 0.1428571429  | 0.1666666667  |  | 0.6666666667 | #DIV/0! |
| INC0160 | 0.1428571429  | 0.1428571429  | 0.1666666667  |  | 0.6666666667 | #DIV/0! |
| INC0160 | 0.04761904762 | 0.04761904762 | 0.1111111111  |  | 0.325        | #DIV/0! |
| INC0160 | 0.1428571429  | 0.1428571429  | 0.1111111111  |  | 1.083333333  | #DIV/0! |
| INC0160 | 0.1428571429  | 0.1428571429  | 0.1111111111  |  | 1.083333333  | #DIV/0! |
| INC0160 | 0.1904761905  | 0.1904761905  | 0.1111111111  |  | 1.529411765  | #DIV/0! |
| INC0160 | 0.1904761905  | 0.1904761905  | 0.1111111111  |  | 1.529411765  | #DIV/0! |
| INC0161 | 0             | 0             | 0.05555555556 |  | 0            | #DIV/0! |
| INC0161 | 0.04761904762 | 0.04761904762 | 0             |  | inf          | #DIV/0! |
| INC0161 | 0             | 0             | 0.05555555556 |  | 0            | #DIV/0! |
| INC0161 | 0.1904761905  | 0.1904761905  | 0.1111111111  |  | 1.529411765  | #DIV/0! |
| INC0161 | 0.2380952381  | 0.2380952381  | 0.05555555556 |  | 4.375        | #DIV/0! |
| INC0161 | 0.04761904762 | 0.04761904762 | 0.05555555556 |  | 0.7          | #DIV/0! |
| INC0162 | 0.1428571429  | 0.1428571429  | 0.1666666667  |  | 0.6666666667 | #DIV/0! |
| INC0162 | 0             | 0             | 0.05555555556 |  | 0            | #DIV/0! |
| INC0163 | 0.09523809524 | 0.09523809524 | 0             |  | inf          | #DIV/0! |
| INC0163 | 0.1428571429  | 0.1428571429  | 0.05555555556 |  | 2.333333333  | #DIV/0! |
| INC0163 | 0.04761904762 | 0.04761904762 | 0.05555555556 |  | 0.7          | #DIV/0! |
| INC0163 | 0.04761904762 | 0.04761904762 | 0.1111111111  |  | 0.325        | #DIV/0! |
| INC0163 | 0.04761904762 | 0.04761904762 | 0.05555555556 |  | 0.7          | #DIV/0! |
| INC0163 | 0.04761904762 | 0.04761904762 | 0.1111111111  |  | 0.325        | #DIV/0! |
| INC0163 | 0             | 0             | 0.1666666667  |  | 0            | #DIV/0! |
| INC0164 | 0.04761904762 | 0.04761904762 | 0.1666666667  |  | 0.2          | #DIV/0! |
| INC0164 | 0.04761904762 | 0.04761904762 | 0.1666666667  |  | 0.2          | #DIV/0! |
| INC0164 | 0.1428571429  | 0.1428571429  | 0             |  | inf          | #DIV/0! |
| INC0164 | 0             | 0             | 0.05555555556 |  | 0            | #DIV/0! |
| INC0164 | 0.04761904762 | 0.04761904762 | 0.1111111111  |  | 0.325        | #DIV/0! |
| INC0164 | 0             | 0             | 0.05555555556 |  | 0            | #DIV/0! |
| INC0164 | 0.04761904762 | 0.04761904762 | 0.05555555556 |  | 0.7          | #DIV/0! |





|         |               |               |              |  |              |         |
|---------|---------------|---------------|--------------|--|--------------|---------|
| INC0171 | 0.09523809524 | 0.09523809524 | 0.1666666667 |  | 0.4210526316 | #DIV/0! |
| INC0171 | 0.1428571429  | 0.1428571429  | 0            |  | inf          | #DIV/0! |
| INC0171 | 0.1428571429  | 0.1428571429  | 0.1111111111 |  | 1.083333333  | #DIV/0! |
| INC0171 | 0.1428571429  | 0.1428571429  | 0.0555555556 |  | 2.333333333  | #DIV/0! |
| INC0172 | 0.1428571429  | 0.1428571429  | 0            |  | inf          | #DIV/0! |
| INC0172 | 0.1904761905  | 0.1904761905  | 0.0555555556 |  | 3.294117647  | #DIV/0! |
| INC0172 | 0.1904761905  | 0.1904761905  | 0.1111111111 |  | 1.529411765  | #DIV/0! |
| INC0172 | 0.1904761905  | 0.1904761905  | 0.1111111111 |  | 1.529411765  | #DIV/0! |
| INC0172 | 0.1428571429  | 0.1428571429  | 0            |  | inf          | #DIV/0! |
| INC0172 | 0.04761904762 | 0.04761904762 | 0.0555555556 |  | 0.7          | #DIV/0! |
| INC0172 | 0.1904761905  | 0.1904761905  | 0.0555555556 |  | 3.294117647  | #DIV/0! |
| INC0172 | 0.1904761905  | 0.1904761905  | 0.0555555556 |  | 3.294117647  | #DIV/0! |
| INC0172 | 0.1428571429  | 0.1428571429  | 0.1666666667 |  | 0.666666667  | #DIV/0! |
| INC0172 | 0.1904761905  | 0.1904761905  | 0.0555555556 |  | 3.294117647  | #DIV/0! |
| INC0173 | 0.1904761905  | 0.1904761905  | 0.0555555556 |  | 3.294117647  | #DIV/0! |
| INC0173 | 0.1428571429  | 0.1428571429  | 0            |  | inf          | #DIV/0! |
| INC0173 | 0.1904761905  | 0.1904761905  | 0.0555555556 |  | 3.294117647  | #DIV/0! |
| INC0173 | 0.1428571429  | 0.1428571429  | 0.1666666667 |  | 0.666666667  | #DIV/0! |
| INC0173 | 0.1428571429  | 0.1428571429  | 0            |  | inf          | #DIV/0! |
| INC0173 | 0.1428571429  | 0.1428571429  | 0            |  | inf          | #DIV/0! |
| INC0173 | 0.04761904762 | 0.04761904762 | 0.0555555556 |  | 0.7          | #DIV/0! |
| INC0174 | 0.09523809524 | 0.09523809524 | 0            |  | inf          | #DIV/0! |
| INC0174 | 0.1428571429  | 0.1428571429  | 0            |  | inf          | #DIV/0! |
| INC0174 | 0.1428571429  | 0.1428571429  | 0.2222222222 |  | 0.4583333333 | #DIV/0! |
| INC0174 | 0.1428571429  | 0.1428571429  | 0.0555555556 |  | 2.333333333  | #DIV/0! |
| INC0174 | 0.1428571429  | 0.1428571429  | 0            |  | inf          | #DIV/0! |
| INC0174 | 0.1428571429  | 0.1428571429  | 0            |  | inf          | #DIV/0! |
| INC0174 | 0.1904761905  | 0.1904761905  | 0.0555555556 |  | 3.294117647  | #DIV/0! |
| INC0174 | 0.04761904762 | 0.04761904762 | 0.0555555556 |  | 0.7          | #DIV/0! |
| INC0174 | 0.1428571429  | 0.1428571429  | 0.2222222222 |  | 0.4583333333 | #DIV/0! |
| INC0175 | 0.04761904762 | 0.04761904762 | 0            |  | inf          | #DIV/0! |
| INC0175 | 0.1904761905  | 0.1904761905  | 0.1111111111 |  | 1.529411765  | #DIV/0! |
| INC0175 | 0.1904761905  | 0.1904761905  | 0.1666666667 |  | 0.9411764706 | #DIV/0! |
| INC0175 | 0.04761904762 | 0.04761904762 | 0.0555555556 |  | 0.7          | #DIV/0! |
| INC0175 | 0.1428571429  | 0.1428571429  | 0.1666666667 |  | 0.666666667  | #DIV/0! |
| INC0175 | 0.04761904762 | 0.04761904762 | 0.0555555556 |  | 0.7          | #DIV/0! |
| INC0175 | 0             | 0             | 0.0555555556 |  | 0            | #DIV/0! |
| INC0175 | 0.04761904762 | 0.04761904762 | 0.1111111111 |  | 0.325        | #DIV/0! |
| INC0175 | 0.04761904762 | 0.04761904762 | 0.0555555556 |  | 0.7          | #DIV/0! |
| INC0176 | 0.04761904762 | 0.04761904762 | 0.0555555556 |  | 0.7          | #DIV/0! |
| INC0176 | 0.04761904762 | 0.04761904762 | 0.0555555556 |  | 0.7          | #DIV/0! |
| INC0176 | 0.04761904762 | 0.04761904762 | 0.0555555556 |  | 0.7          | #DIV/0! |
| INC0176 | 0.04761904762 | 0.04761904762 | 0.0555555556 |  | 0.7          | #DIV/0! |
| INC0176 | 0.04761904762 | 0.04761904762 | 0.0555555556 |  | 0.7          | #DIV/0! |
| INC0176 | 0.04761904762 | 0.04761904762 | 0.0555555556 |  | 0.7          | #DIV/0! |
| INC0177 | 0             | 0             | 0.1111111111 |  | 0            | #DIV/0! |
| INC0177 | 0.04761904762 | 0.04761904762 | 0.0555555556 |  | 0.7          | #DIV/0! |
| INC0177 | 0.04761904762 | 0.04761904762 | 0.1111111111 |  | 0.325        | #DIV/0! |
| INC0177 | 0.1428571429  | 0.1428571429  | 0            |  | inf          | #DIV/0! |
| INC0177 | 0.09523809524 | 0.09523809524 | 0.0555555556 |  | 1.473684211  | #DIV/0! |
| INC0177 | 0.04761904762 | 0.04761904762 | 0.0555555556 |  | 0.7          | #DIV/0! |



|         |               |               |               |  |              |         |
|---------|---------------|---------------|---------------|--|--------------|---------|
| INC0184 | 0.04761904762 | 0.04761904762 | 0             |  | inf          | #DIV/0! |
| INC0184 | 0.04761904762 | 0.04761904762 | 0.05555555556 |  | 0.7          | #DIV/0! |
| INC0184 | 0.04761904762 | 0.04761904762 | 0             |  | inf          | #DIV/0! |
| INC0184 | 0.04761904762 | 0.04761904762 | 0.05555555556 |  | 0.7          | #DIV/0! |
| INC0184 | 0.04761904762 | 0.04761904762 | 0             |  | inf          | #DIV/0! |
| INC0184 | 0             | 0             | 0.05555555556 |  | 0            | #DIV/0! |
| INC0185 | 0             | 0             | 0.05555555556 |  | 0            | #DIV/0! |
| INC0185 | 0             | 0             | 0             |  |              | #DIV/0! |
| INC0185 | 0             | 0             | 0.05555555556 |  | 0            | #DIV/0! |
| INC0185 | 0.1428571429  | 0.1428571429  | 0.1111111111  |  | 1.083333333  | #DIV/0! |
| INC0185 | 0             | 0             | 0.05555555556 |  | 0            | #DIV/0! |
| INC0185 | 0             | 0             | 0.05555555556 |  | 0            | #DIV/0! |
| INC0185 | 0.09523809524 | 0.09523809524 | 0             |  | inf          | #DIV/0! |
| INC0185 | 0.09523809524 | 0.09523809524 | 0             |  | inf          | #DIV/0! |
| INC0186 | 0.1428571429  | 0.1428571429  | 0.05555555556 |  | 2.333333333  | #DIV/0! |
| INC0186 | 0             | 0             | 0.05555555556 |  | 0            | #DIV/0! |
| INC0186 | 0.04761904762 | 0.04761904762 | 0.05555555556 |  | 0.7          | #DIV/0! |
| INC0186 | 0.09523809524 | 0.09523809524 | 0.05555555556 |  | 1.473684211  | #DIV/0! |
| INC0187 | 0             | 0             | 0.05555555556 |  | 0            | #DIV/0! |
| INC0187 | 0             | 0             | 0.05555555556 |  | 0            | #DIV/0! |
| INC0187 | 0             | 0             | 0.05555555556 |  | 0            | #DIV/0! |
| INC0187 | 0             | 0             | 0.05555555556 |  | 0            | #DIV/0! |
| INC0187 | 0             | 0             | 0.05555555556 |  | 0            | #DIV/0! |
| INC0187 | 0             | 0             | 0.05555555556 |  | 0            | #DIV/0! |
| INC0187 | 0.09523809524 | 0.09523809524 | 0.05555555556 |  | 1.473684211  | #DIV/0! |
| INC0188 | 0             | 0             | 0.05555555556 |  | 0            | #DIV/0! |
| INC0188 | 0             | 0             | 0.05555555556 |  | 0            | #DIV/0! |
| INC0188 | 0.09523809524 | 0.09523809524 | 0.05555555556 |  | 1.473684211  | #DIV/0! |
| INC0188 | 0             | 0             | 0.05555555556 |  | 0            | #DIV/0! |
| INC0188 | 0             | 0             | 0.05555555556 |  | 0            | #DIV/0! |
| INC0188 | 0             | 0             | 0.05555555556 |  | 0            | #DIV/0! |
| INC0188 | 0.09523809524 | 0.09523809524 | 0             |  | inf          | #DIV/0! |
| INC0189 | 0             | 0             | 0.05555555556 |  | 0            | #DIV/0! |
| INC0189 | 0.09523809524 | 0.09523809524 | 0             |  | inf          | #DIV/0! |
| INC0189 | 0.09523809524 | 0.09523809524 | 0.05555555556 |  | 1.473684211  | #DIV/0! |
| INC0189 | 0.09523809524 | 0.09523809524 | 0.1111111111  |  | 0.6842105263 | #DIV/0! |
| INC0189 | 0.09523809524 | 0.09523809524 | 0             |  | inf          | #DIV/0! |
| INC0189 | 0.09523809524 | 0.09523809524 | 0             |  | inf          | #DIV/0! |
| INC0190 | 0.09523809524 | 0.09523809524 | 0             |  | inf          | #DIV/0! |
| INC0190 | 0.09523809524 | 0.09523809524 | 0             |  | inf          | #DIV/0! |
| INC0190 | 0.09523809524 | 0.09523809524 | 0             |  | inf          | #DIV/0! |
| INC0190 | 0             | 0             | 0.05555555556 |  | 0            | #DIV/0! |
| INC0191 | 0             | 0             | 0.05555555556 |  | 0            | #DIV/0! |
| INC0191 | 0             | 0             | 0.05555555556 |  | 0            | #DIV/0! |
| INC0191 | 0.09523809524 | 0.09523809524 | 0.05555555556 |  | 1.473684211  | #DIV/0! |
| INC0191 | 0.09523809524 | 0.09523809524 | 0             |  | inf          | #DIV/0! |
| INC0191 | 0             | 0             | 0.05555555556 |  | 0            | #DIV/0! |
| INC0191 | 0.09523809524 | 0.09523809524 | 0             |  | inf          | #DIV/0! |
| INC0192 | 0             | 0             | 0.05555555556 |  | 0            | #DIV/0! |
| INC0192 | 0             | 0             | 0.1111111111  |  | 0            | #DIV/0! |
| INC0192 | 0             | 0             | 0.05555555556 |  | 0            | #DIV/0! |





|         |               |               |               |  |              |         |
|---------|---------------|---------------|---------------|--|--------------|---------|
| INC0206 | 0.04761904762 | 0.04761904762 | 0             |  | inf          | #DIV/0! |
| INC0206 | 0.04761904762 | 0.04761904762 | 0             |  | inf          | #DIV/0! |
| INC0206 | 0.04761904762 | 0.04761904762 | 0.05555555556 |  | 0.7          | #DIV/0! |
| INC0206 | 0.04761904762 | 0.04761904762 | 0             |  | inf          | #DIV/0! |
| INC0206 | 0.1428571429  | 0.1428571429  | 0.05555555556 |  | 2.333333333  | #DIV/0! |
| INC0206 | 0.1904761905  | 0.1904761905  | 0.1111111111  |  | 1.529411765  | #DIV/0! |
| INC0206 | 0.1428571429  | 0.1428571429  | 0.05555555556 |  | 2.333333333  | #DIV/0! |
| INC0207 | 0.04761904762 | 0.04761904762 | 0             |  | inf          | #DIV/0! |
| INC0207 | 0.04761904762 | 0.04761904762 | 0             |  | inf          | #DIV/0! |
| INC0207 | 0.04761904762 | 0.04761904762 | 0             |  | inf          | #DIV/0! |
| INC0207 | 0.04761904762 | 0.04761904762 | 0             |  | inf          | #DIV/0! |
| INC0207 | 0.09523809524 | 0.09523809524 | 0             |  | inf          | #DIV/0! |
| INC0207 | 0.04761904762 | 0.04761904762 | 0.1111111111  |  | 0.325        | #DIV/0! |
| INC0207 | 0.04761904762 | 0.04761904762 | 0             |  | inf          | #DIV/0! |
| INC0207 | 0.04761904762 | 0.04761904762 | 0             |  | inf          | #DIV/0! |
| INC0207 | 0.09523809524 | 0.09523809524 | 0             |  | inf          | #DIV/0! |
| INC0208 | 0.04761904762 | 0.04761904762 | 0             |  | inf          | #DIV/0! |
| INC0208 | 0.1428571429  | 0.1428571429  | 0.05555555556 |  | 2.333333333  | #DIV/0! |
| INC0208 | 0.09523809524 | 0.09523809524 | 0.05555555556 |  | 1.473684211  | #DIV/0! |
| INC0208 | 0.04761904762 | 0.04761904762 | 0.05555555556 |  | 0.7          | #DIV/0! |
| INC0208 | 0.09523809524 | 0.09523809524 | 0.05555555556 |  | 1.473684211  | #DIV/0! |
| INC0208 | 0.04761904762 | 0.04761904762 | 0             |  | inf          | #DIV/0! |
| INC0209 | 0.04761904762 | 0.04761904762 | 0.05555555556 |  | 0.7          | #DIV/0! |
| INC0209 | 0             | 0             | 0.1111111111  |  | 0            | #DIV/0! |
| INC0209 | 0.04761904762 | 0.04761904762 | 0             |  | inf          | #DIV/0! |
| INC0209 | 0.04761904762 | 0.04761904762 | 0.1111111111  |  | 0.325        | #DIV/0! |
| INC0209 | 0             | 0             | 0             |  |              | #DIV/0! |
| INC0209 | 0.04761904762 | 0.04761904762 | 0.1111111111  |  | 0.325        | #DIV/0! |
| INC0210 | 0.04761904762 | 0.04761904762 | 0             |  | inf          | #DIV/0! |
| INC0210 | 0             | 0             | 0.05555555556 |  | 0            | #DIV/0! |
| INC0210 | 0.04761904762 | 0.04761904762 | 0.05555555556 |  | 0.7          | #DIV/0! |
| INC0210 | 0.04761904762 | 0.04761904762 | 0.05555555556 |  | 0.7          | #DIV/0! |
| INC0210 | 0.04761904762 | 0.04761904762 | 0.05555555556 |  | 0.7          | #DIV/0! |
| INC0210 | 0.04761904762 | 0.04761904762 | 0.05555555556 |  | 0.7          | #DIV/0! |
| INC0210 | 0.04761904762 | 0.04761904762 | 0.05555555556 |  | 0.7          | #DIV/0! |
| INC0210 | 0.04761904762 | 0.04761904762 | 0             |  | inf          | #DIV/0! |
| INC0210 | 0.04761904762 | 0.04761904762 | 0.05555555556 |  | 0.7          | #DIV/0! |
| INC0211 | 0.04761904762 | 0.04761904762 | 0.05555555556 |  | 0.7          | #DIV/0! |
| INC0211 | 0.04761904762 | 0.04761904762 | 0.05555555556 |  | 0.7          | #DIV/0! |
| INC0211 | 0             | 0             | 0.05555555556 |  | 0            | #DIV/0! |
| INC0211 | 0.04761904762 | 0.04761904762 | 0             |  | inf          | #DIV/0! |
| INC0211 | 0             | 0             | 0.1111111111  |  | 0            | #DIV/0! |
| INC0211 | 0.04761904762 | 0.04761904762 | 0             |  | inf          | #DIV/0! |
| INC0211 | 0             | 0             | 0.1111111111  |  | 0            | #DIV/0! |
| INC0211 | 0.04761904762 | 0.04761904762 | 0.05555555556 |  | 0.7          | #DIV/0! |
| INC0211 | 0.04761904762 | 0.04761904762 | 0.05555555556 |  | 0.7          | #DIV/0! |
| INC0212 | 0.04761904762 | 0.04761904762 | 0.05555555556 |  | 0.7          | #DIV/0! |
| INC0212 | 0             | 0             | 0.1111111111  |  | 0            | #DIV/0! |
| INC0212 | 0             | 0             | 0.05555555556 |  | 0            | #DIV/0! |
| INC0212 | 0.09523809524 | 0.09523809524 | 0.2222222222  |  | 0.2894736842 | #DIV/0! |
| INC0212 | 0.04761904762 | 0.04761904762 | 0             |  | inf          | #DIV/0! |

|         |               |               |               |  |              |         |
|---------|---------------|---------------|---------------|--|--------------|---------|
| INC0212 | 0.04761904762 | 0.04761904762 | 0.05555555556 |  | 0.7          | #DIV/0! |
| INC0212 | 0.04761904762 | 0.04761904762 | 0             |  | inf          | #DIV/0! |
| INC0213 | 0.04761904762 | 0.04761904762 | 0             |  | inf          | #DIV/0! |
| INC0213 | 0.04761904762 | 0.04761904762 | 0             |  | inf          | #DIV/0! |
| INC0213 | 0.04761904762 | 0.04761904762 | 0             |  | inf          | #DIV/0! |
| INC0213 | 0.04761904762 | 0.04761904762 | 0             |  | inf          | #DIV/0! |
| INC0213 | 0.04761904762 | 0.04761904762 | 0             |  | inf          | #DIV/0! |
| INC0213 | 0.09523809524 | 0.09523809524 | 0             |  | inf          | #DIV/0! |
| INC0213 | 0.04761904762 | 0.04761904762 | 0             |  | inf          | #DIV/0! |
| INC0214 | 0.04761904762 | 0.04761904762 | 0             |  | inf          | #DIV/0! |
| INC0214 | 0.04761904762 | 0.04761904762 | 0             |  | inf          | #DIV/0! |
| INC0214 | 0             | 0             | 0.05555555556 |  | 0            | #DIV/0! |
| INC0214 | 0             | 0             | 0.1111111111  |  | 0            | #DIV/0! |
| INC0214 | 0.04761904762 | 0.04761904762 | 0.1111111111  |  | 0.325        | #DIV/0! |
| INC0214 | 0.04761904762 | 0.04761904762 | 0             |  | inf          | #DIV/0! |
| INC0214 | 0.04761904762 | 0.04761904762 | 0             |  | inf          | #DIV/0! |
| INC0214 | 0.04761904762 | 0.04761904762 | 0.05555555556 |  | 0.7          | #DIV/0! |
| INC0215 | 0.04761904762 | 0.04761904762 | 0.05555555556 |  | 0.7          | #DIV/0! |
| INC0215 | 0.09523809524 | 0.09523809524 | 0.1111111111  |  | 0.6842105263 | #DIV/0! |
| INC0215 | 0.1428571429  | 0.1428571429  | 0.1666666667  |  | 0.6666666667 | #DIV/0! |
| INC0215 | 0.04761904762 | 0.04761904762 | 0.05555555556 |  | 0.7          | #DIV/0! |
| INC0215 | 0.04761904762 | 0.04761904762 | 0             |  | inf          | #DIV/0! |
| INC0215 | 0.04761904762 | 0.04761904762 | 0.05555555556 |  | 0.7          | #DIV/0! |
| INC0216 | 0.04761904762 | 0.04761904762 | 0.1111111111  |  | 0.325        | #DIV/0! |
| INC0216 | 0             | 0             | 0.1111111111  |  | 0            | #DIV/0! |
| INC0216 | 0.04761904762 | 0.04761904762 | 0             |  | inf          | #DIV/0! |
| INC0216 | 0.04761904762 | 0.04761904762 | 0             |  | inf          | #DIV/0! |
| INC0216 | 0.04761904762 | 0.04761904762 | 0             |  | inf          | #DIV/0! |
| INC0217 | 0.04761904762 | 0.04761904762 | 0             |  | inf          | #DIV/0! |
| INC0217 | 0             | 0             | 0.05555555556 |  | 0            | #DIV/0! |
| INC0217 | 0             | 0             | 0.05555555556 |  | 0            | #DIV/0! |
| INC0217 | 0             | 0             | 0.05555555556 |  | 0            | #DIV/0! |
| INC0217 | 0.04761904762 | 0.04761904762 | 0             |  | inf          | #DIV/0! |
| INC0217 | 0.04761904762 | 0.04761904762 | 0             |  | inf          | #DIV/0! |
| INC0217 | 0.04761904762 | 0.04761904762 | 0             |  | inf          | #DIV/0! |
| INC0218 | 0.04761904762 | 0.04761904762 | 0             |  | inf          | #DIV/0! |
| INC0218 | 0.04761904762 | 0.04761904762 | 0             |  | inf          | #DIV/0! |
| INC0218 | 0.09523809524 | 0.09523809524 | 0             |  | inf          | #DIV/0! |
| INC0218 | 0.04761904762 | 0.04761904762 | 0             |  | inf          | #DIV/0! |
| INC0218 | 0.04761904762 | 0.04761904762 | 0             |  | inf          | #DIV/0! |
| INC0218 | 0.04761904762 | 0.04761904762 | 0             |  | inf          | #DIV/0! |
| INC0218 | 0.04761904762 | 0.04761904762 | 0             |  | inf          | #DIV/0! |
| INC0218 | 0.04761904762 | 0.04761904762 | 0             |  | inf          | #DIV/0! |
| INC0219 | 0.04761904762 | 0.04761904762 | 0             |  | inf          | #DIV/0! |
| INC0219 | 0.04761904762 | 0.04761904762 | 0             |  | inf          | #DIV/0! |
| INC0219 | 0.09523809524 | 0.09523809524 | 0.1666666667  |  | 0.4210526316 | #DIV/0! |
| INC0219 | 0.04761904762 | 0.04761904762 | 0.05555555556 |  | 0.7          | #DIV/0! |
| INC0219 | 0             | 0             | 0.05555555556 |  | 0            | #DIV/0! |
| INC0220 | 0.04761904762 | 0.04761904762 | 0             |  | inf          | #DIV/0! |
| INC0220 | 0.04761904762 | 0.04761904762 | 0             |  | inf          | #DIV/0! |
| INC0220 | 0.04761904762 | 0.04761904762 | 0.05555555556 |  | 0.7          | #DIV/0! |
| INC0220 | 0.2857142857  | 0.2857142857  | 0.1111111111  |  | 2.6          | #DIV/0! |

|          |               |               |               |  |             |         |
|----------|---------------|---------------|---------------|--|-------------|---------|
| INC0220  | 0.04761904762 | 0.04761904762 | 0.05555555556 |  | 0.7         | #DIV/0! |
| INC0220  | 0.04761904762 | 0.04761904762 | 0.05555555556 |  | 0.7         | #DIV/0! |
| INC0220  | 0.04761904762 | 0.04761904762 | 0.05555555556 |  | 0.7         | #DIV/0! |
| INC0220  | 0.04761904762 | 0.04761904762 | 0.05555555556 |  | 0.7         | #DIV/0! |
| INC0220  | 0.04761904762 | 0.04761904762 | 0             |  | inf         | #DIV/0! |
| INC0220  | 0.04761904762 | 0.04761904762 | 0.1111111111  |  | 0.325       | #DIV/0! |
| INC0221  | 0.1428571429  | 0.1428571429  | 0             |  | inf         | #DIV/0! |
| 02210-C1 | 0.1428571429  | 0.1428571429  | 0             |  | inf         | #DIV/0! |
| INC0221  | 0.04761904762 | 0.04761904762 | 0.05555555556 |  | 0.7         | #DIV/0! |
| INC0221  | 0.04761904762 | 0.04761904762 | 0.05555555556 |  | 0.7         | #DIV/0! |
| INC0221  | 0.04761904762 | 0.04761904762 | 0.05555555556 |  | 0.7         | #DIV/0! |
| INC0221  | 0.04761904762 | 0.04761904762 | 0             |  | inf         | #DIV/0! |
| INC0221  | 0.04761904762 | 0.04761904762 | 0             |  | inf         | #DIV/0! |
| INC0221  | 0.04761904762 | 0.04761904762 | 0.05555555556 |  | 0.7         | #DIV/0! |
| INC0221  | 0.04761904762 | 0.04761904762 | 0.05555555556 |  | 0.7         | #DIV/0! |
| INC0221  | 0.04761904762 | 0.04761904762 | 0             |  | inf         | #DIV/0! |
| INC0222  | 0.04761904762 | 0.04761904762 | 0.05555555556 |  | 0.7         | #DIV/0! |
| INC0222  | 0             | 0             | 0.05555555556 |  | 0           | #DIV/0! |
| INC0222  | 0.09523809524 | 0.09523809524 | 0.05555555556 |  | 1.473684211 | #DIV/0! |
| INC0222  | 0.04761904762 | 0.04761904762 | 0.05555555556 |  | 0.7         | #DIV/0! |
| INC0222  | 0.04761904762 | 0.04761904762 | 0.05555555556 |  | 0.7         | #DIV/0! |
| INC0222  | 0.04761904762 | 0.04761904762 | 0             |  | inf         | #DIV/0! |
| INC0222  | 0             | 0             | 0.05555555556 |  | 0           | #DIV/0! |
| INC0222  | 0.04761904762 | 0.04761904762 | 0.05555555556 |  | 0.7         | #DIV/0! |
| INC0222  | 0.04761904762 | 0.04761904762 | 0.05555555556 |  | 0.7         | #DIV/0! |
| INC0222  | 0.04761904762 | 0.04761904762 | 0             |  | inf         | #DIV/0! |
| INC0223  | 0             | 0             | 0.05555555556 |  | 0           | #DIV/0! |
| INC0223  | 0.09523809524 | 0.09523809524 | 0.05555555556 |  | 1.473684211 | #DIV/0! |
| INC0223  | 0.04761904762 | 0.04761904762 | 0.05555555556 |  | 0.7         | #DIV/0! |
| INC0223  | 0             | 0             | 0.05555555556 |  | 0           | #DIV/0! |
| INC0223  | 0.04761904762 | 0.04761904762 | 0             |  | inf         | #DIV/0! |
| INC0223  | 0             | 0             | 0.05555555556 |  | 0           | #DIV/0! |
| INC0223  | 0.1904761905  | 0.1904761905  | 0.1111111111  |  | 1.529411765 | #DIV/0! |
| INC0223  | 0.04761904762 | 0.04761904762 | 0.05555555556 |  | 0.7         | #DIV/0! |
| INC0223  | 0.04761904762 | 0.04761904762 | 0.05555555556 |  | 0.7         | #DIV/0! |
| INC0224  | 0.04761904762 | 0.04761904762 | 0             |  | inf         | #DIV/0! |
| INC0224  | 0.04761904762 | 0.04761904762 | 0.1111111111  |  | 0.325       | #DIV/0! |
| INC0224  | 0.04761904762 | 0.04761904762 | 0             |  | inf         | #DIV/0! |
| INC0224  | 0             | 0             | 0.05555555556 |  | 0           | #DIV/0! |
| INC0224  | 0.04761904762 | 0.04761904762 | 0.1111111111  |  | 0.325       | #DIV/0! |
| INC0224  | 0.04761904762 | 0.04761904762 | 0             |  | inf         | #DIV/0! |
| INC0225  | 0.04761904762 | 0.04761904762 | 0.05555555556 |  | 0.7         | #DIV/0! |
| INC0225  | 0.04761904762 | 0.04761904762 | 0.05555555556 |  | 0.7         | #DIV/0! |
| INC0225  | 0.04761904762 | 0.04761904762 | 0.05555555556 |  | 0.7         | #DIV/0! |
| INC0225  | 0.1904761905  | 0.1904761905  | 0.05555555556 |  | 3.294117647 | #DIV/0! |
| INC0225  | 0.04761904762 | 0.04761904762 | 0.05555555556 |  | 0.7         | #DIV/0! |
| INC0225  | 0.04761904762 | 0.04761904762 | 0.05555555556 |  | 0.7         | #DIV/0! |
| INC0226  | 0.1904761905  | 0.1904761905  | 0.05555555556 |  | 3.294117647 | #DIV/0! |
| INC0226  | 0             | 0             | 0.05555555556 |  | 0           | #DIV/0! |
| INC0226  | 0             | 0             | 0.05555555556 |  | 0           | #DIV/0! |
| INC0226  | 0             | 0             | 0.05555555556 |  | 0           | #DIV/0! |



|         |               |               |               |  |             |         |
|---------|---------------|---------------|---------------|--|-------------|---------|
| INC0226 | 0.1904761905  | 0.1904761905  | 0.05555555556 |  | 3.294117647 | #DIV/0! |
| INC0226 | 0             | 0             | 0.05555555556 |  | 0           | #DIV/0! |
| INC0226 | 0             | 0             | 0.05555555556 |  | 0           | #DIV/0! |
| INC0226 | 0             | 0             | 0.05555555556 |  | 0           | #DIV/0! |
| INC0226 | 0             | 0             | 0.05555555556 |  | 0           | #DIV/0! |
| INC0227 | 0             | 0             | 0             |  |             | #DIV/0! |
| INC0227 | 0.04761904762 | 0.04761904762 | 0.05555555556 |  | 0.7         | #DIV/0! |
| INC0227 | 0             | 0             | 0.05555555556 |  | 0           | #DIV/0! |
| INC0227 | 0.09523809524 | 0.09523809524 | 0             |  | inf         | #DIV/0! |
| INC0227 | 0             | 0             | 0.05555555556 |  | 0           | #DIV/0! |
| INC0227 | 0.04761904762 | 0.04761904762 | 0             |  | inf         | #DIV/0! |
| INC0228 | 0.2380952381  | 0.2380952381  | 0.05555555556 |  | 4.375       | #DIV/0! |
| INC0229 | 0.1428571429  | 0.1428571429  | 0.1111111111  |  | 1.083333333 | #DIV/0! |
| INC0230 | 0.04761904762 | 0.04761904762 | 0             |  | inf         | #DIV/0! |
| INC0230 | 0.04761904762 | 0.04761904762 | 0             |  | inf         | #DIV/0! |
| INC0231 | 0.04761904762 | 0.04761904762 | 0             |  | inf         | #DIV/0! |
| INC0231 | 0.04761904762 | 0.04761904762 | 0             |  | inf         | #DIV/0! |
| INC0233 | 0             | 0             | 0.05555555556 |  | 0           | #DIV/0! |
| INC0234 | 0             | 0             | 0             |  |             | #DIV/0! |
| INC0234 | 0.09523809524 | 0.09523809524 | 0.05555555556 |  | 1.473684211 | #DIV/0! |
| INC0234 | 0.04761904762 | 0.04761904762 | 0.05555555556 |  | 0.7         | #DIV/0! |
| INC0234 | 0.04761904762 | 0.04761904762 | 0.05555555556 |  | 0.7         | #DIV/0! |
| INC0235 | 0.09523809524 | 0.09523809524 | 0.05555555556 |  | 1.473684211 | #DIV/0! |
| INC0235 | 0.04761904762 | 0.04761904762 | 0.05555555556 |  | 0.7         | #DIV/0! |
| INC0235 | 0             | 0             | 0.05555555556 |  | 0           | #DIV/0! |
| INC0235 | 0.09523809524 | 0.09523809524 | 0.05555555556 |  | 1.473684211 | #DIV/0! |
| INC0236 | 0             | 0             | 0             |  |             | #DIV/0! |
| INC0236 | 0.09523809524 | 0.09523809524 | 0.05555555556 |  | 1.473684211 | #DIV/0! |
| INC0236 | 0             | 0             | 0.05555555556 |  | 0           | #DIV/0! |
| INC0236 | 0             | 0             | 0.05555555556 |  | 0           | #DIV/0! |
| INC0236 | 0             | 0             | 0.05555555556 |  | 0           | #DIV/0! |
| INC0236 | 0.04761904762 | 0.04761904762 | 0.1111111111  |  | 0.325       | #DIV/0! |
| INC0236 | 0.04761904762 | 0.04761904762 | 0.1111111111  |  | 0.325       | #DIV/0! |
| INC0236 | 0.09523809524 | 0.09523809524 | 0.05555555556 |  | 1.473684211 | #DIV/0! |
| INC0236 | 0.09523809524 | 0.09523809524 | 0.05555555556 |  | 1.473684211 | #DIV/0! |
| INC0237 | 0.09523809524 | 0.09523809524 | 0.05555555556 |  | 1.473684211 | #DIV/0! |
| INC0237 | 0.09523809524 | 0.09523809524 | 0.05555555556 |  | 1.473684211 | #DIV/0! |
| INC0237 | 0             | 0             | 0.05555555556 |  | 0           | #DIV/0! |
| INC0237 | 0.09523809524 | 0.09523809524 | 0.05555555556 |  | 1.473684211 | #DIV/0! |
| INC0237 | 0.09523809524 | 0.09523809524 | 0.05555555556 |  | 1.473684211 | #DIV/0! |
| INC0237 | 0.04761904762 | 0.04761904762 | 0.1111111111  |  | 0.325       | #DIV/0! |
| INC0238 | 0.1904761905  | 0.1904761905  | 0.05555555556 |  | 3.294117647 | #DIV/0! |
| INC0238 | 0.04761904762 | 0.04761904762 | 0.05555555556 |  | 0.7         | #DIV/0! |
| INC0238 | 0             | 0             | 0.05555555556 |  | 0           | #DIV/0! |
| INC0238 | 0.04761904762 | 0.04761904762 | 0             |  | inf         | #DIV/0! |
| INC0238 | 0.09523809524 | 0.09523809524 | 0.05555555556 |  | 1.473684211 | #DIV/0! |
| INC0238 | 0.1428571429  | 0.1428571429  | 0.1111111111  |  | 1.083333333 | #DIV/0! |
| INC0238 | 0.09523809524 | 0.09523809524 | 0             |  | inf         | #DIV/0! |
| INC0238 | 0.09523809524 | 0.09523809524 | 0.05555555556 |  | 1.473684211 | #DIV/0! |
| INC0239 | 0.04761904762 | 0.04761904762 | 0.05555555556 |  | 0.7         | #DIV/0! |
| INC0239 | 0.09523809524 | 0.09523809524 | 0.05555555556 |  | 1.473684211 | #DIV/0! |



|         |               |               |               |  |             |         |
|---------|---------------|---------------|---------------|--|-------------|---------|
| INC0247 | 0.04761904762 | 0.04761904762 | 0.05555555556 |  | 0.7         | #DIV/0! |
| INC0247 | 0.1904761905  | 0.1904761905  | 0.05555555556 |  | 3.294117647 | #DIV/0! |
| INC0247 | 0.04761904762 | 0.04761904762 | 0             |  | inf         | #DIV/0! |
| INC0247 | 0.04761904762 | 0.04761904762 | 0.05555555556 |  | 0.7         | #DIV/0! |
| INC0247 | 0             | 0             | 0.05555555556 |  | 0           | #DIV/0! |
| INC0247 | 0             | 0             | 0.05555555556 |  | 0           | #DIV/0! |
| INC0248 | 0.2380952381  | 0.2380952381  | 0.05555555556 |  | 4.375       | #DIV/0! |
| INC0248 | 0.04761904762 | 0.04761904762 | 0.05555555556 |  | 0.7         | #DIV/0! |
| INC0248 | 0             | 0             | 0.05555555556 |  | 0           | #DIV/0! |
| INC0248 | 0.04761904762 | 0.04761904762 | 0             |  | inf         | #DIV/0! |
| INC0249 | 0.04761904762 | 0.04761904762 | 0.05555555556 |  | 0.7         | #DIV/0! |
| INC0249 | 0             | 0             | 0.05555555556 |  | 0           | #DIV/0! |
| INC0249 | 0             | 0             | 0             |  |             | #DIV/0! |
| INC0249 | 0.1428571429  | 0.1428571429  | 0.05555555556 |  | 2.333333333 | #DIV/0! |
| INC0249 | 0.09523809524 | 0.09523809524 | 0.05555555556 |  | 1.473684211 | #DIV/0! |
| INC0250 | 0             | 0             | 0.05555555556 |  | 0           | #DIV/0! |
| INC0250 | 0             | 0             | 0.05555555556 |  | 0           | #DIV/0! |
| INC0250 | 0             | 0             | 0.05555555556 |  | 0           | #DIV/0! |
| INC0250 | 0             | 0             | 0.05555555556 |  | 0           | #DIV/0! |
| INC0251 | 0             | 0             | 0.05555555556 |  | 0           | #DIV/0! |
| INC0251 | 0             | 0             | 0.05555555556 |  | 0           | #DIV/0! |
| INC0251 | 0             | 0             | 0.05555555556 |  | 0           | #DIV/0! |
| INC0251 | 0             | 0             | 0.05555555556 |  | 0           | #DIV/0! |
| INC0252 | 0.04761904762 | 0.04761904762 | 0.05555555556 |  | 0.7         | #DIV/0! |
| INC0252 | 0             | 0             | 0             |  |             | #DIV/0! |
| INC0253 | 0             | 0             | 0             |  |             | #DIV/0! |
| INC0253 | 0.04761904762 | 0.04761904762 | 0.05555555556 |  | 0.7         | #DIV/0! |
| INC0255 | 0.04761904762 | 0.04761904762 | 0.1111111111  |  | 0.325       | #DIV/0! |
| INC0255 | 0             | 0             | 0.05555555556 |  | 0           | #DIV/0! |
| INC0255 | 0.04761904762 | 0.04761904762 | 0.1111111111  |  | 0.325       | #DIV/0! |
| INC0256 | 0.1428571429  | 0.1428571429  | 0.05555555556 |  | 2.333333333 | #DIV/0! |
| INC0256 | 0             | 0             | 0.1666666667  |  | 0           | #DIV/0! |
| INC0256 | 0.09523809524 | 0.09523809524 | 0.05555555556 |  | 1.473684211 | #DIV/0! |
| INC0256 | 0.04761904762 | 0.04761904762 | 0             |  | inf         | #DIV/0! |
| INC0256 | 0.09523809524 | 0.09523809524 | 0             |  | inf         | #DIV/0! |
| INC0256 | 0.09523809524 | 0.09523809524 | 0             |  | inf         | #DIV/0! |
| INC0256 | 0.04761904762 | 0.04761904762 | 0.05555555556 |  | 0.7         | #DIV/0! |
| INC0256 | 0.04761904762 | 0.04761904762 | 0.05555555556 |  | 0.7         | #DIV/0! |
| INC0257 | 0             | 0             | 0.05555555556 |  | 0           | #DIV/0! |
| INC0257 | 0.04761904762 | 0.04761904762 | 0.1111111111  |  | 0.325       | #DIV/0! |
| INC0257 | 0.04761904762 | 0.04761904762 | 0.1111111111  |  | 0.325       | #DIV/0! |
| INC0257 | 0.04761904762 | 0.04761904762 | 0.1111111111  |  | 0.325       | #DIV/0! |
| INC0257 | 0.04761904762 | 0.04761904762 | 0             |  | inf         | #DIV/0! |
| INC0257 | 0             | 0             | 0.05555555556 |  | 0           | #DIV/0! |
| INC0258 | 0             | 0             | 0.05555555556 |  | 0           | #DIV/0! |
| INC0258 | 0             | 0             | 0.05555555556 |  | 0           | #DIV/0! |
| INC0258 | 0.09523809524 | 0.09523809524 | 0             |  | inf         | #DIV/0! |
| INC0258 | 0.04761904762 | 0.04761904762 | 0             |  | inf         | #DIV/0! |
| INC0258 | 0.04761904762 | 0.04761904762 | 0.2222222222  |  | 0.1375      | #DIV/0! |
| INC0259 | 0             | 0             | 0.1111111111  |  | 0           | #DIV/0! |
| INC0260 | 0.04761904762 | 0.04761904762 | 0.05555555556 |  | 0.7         | #DIV/0! |

|         |               |               |              |  |              |         |
|---------|---------------|---------------|--------------|--|--------------|---------|
| INC0260 | 0.04761904762 | 0.04761904762 | 0.1111111111 |  | 0.325        | #DIV/0! |
| INC0260 | 0.1428571429  | 0.1428571429  | 0.1111111111 |  | 1.083333333  | #DIV/0! |
| INC0260 | 0             | 0             | 0.0555555556 |  | 0            | #DIV/0! |
| INC0260 | 0.04761904762 | 0.04761904762 | 0.0555555556 |  | 0.7          | #DIV/0! |
| INC0260 | 0.09523809524 | 0.09523809524 | 0            |  | inf          | #DIV/0! |
| INC0260 | 0.04761904762 | 0.04761904762 | 0.0555555556 |  | 0.7          | #DIV/0! |
| INC0261 | 0             | 0             | 0.0555555556 |  | 0            | #DIV/0! |
| INC0261 | 0             | 0             | 0.0555555556 |  | 0            | #DIV/0! |
| INC0261 | 0             | 0             | 0.0555555556 |  | 0            | #DIV/0! |
| INC0261 | 0             | 0             | 0.0555555556 |  | 0            | #DIV/0! |
| INC0261 | 0.04761904762 | 0.04761904762 | 0.0555555556 |  | 0.7          | #DIV/0! |
| INC0261 | 0             | 0             | 0.0555555556 |  | 0            | #DIV/0! |
| INC0261 | 0.04761904762 | 0.04761904762 | 0.1111111111 |  | 0.325        | #DIV/0! |
| INC0261 | 0.1904761905  | 0.1904761905  | 0.0555555556 |  | 3.294117647  | #DIV/0! |
| INC0261 | 0.09523809524 | 0.09523809524 | 0.0555555556 |  | 1.473684211  | #DIV/0! |
| INC0262 | 0.1428571429  | 0.1428571429  | 0.0555555556 |  | 2.333333333  | #DIV/0! |
| INC0262 | 0.09523809524 | 0.09523809524 | 0            |  | inf          | #DIV/0! |
| INC0262 | 0.1428571429  | 0.1428571429  | 0.0555555556 |  | 2.333333333  | #DIV/0! |
| INC0262 | 0.1428571429  | 0.1428571429  | 0            |  | inf          | #DIV/0! |
| INC0262 | 0.1904761905  | 0.1904761905  | 0.0555555556 |  | 3.294117647  | #DIV/0! |
| INC0262 | 0.1428571429  | 0.1428571429  | 0            |  | inf          | #DIV/0! |
| INC0263 | 0.04761904762 | 0.04761904762 | 0.1666666667 |  | 0.2          | #DIV/0! |
| INC0264 | 0.09523809524 | 0.09523809524 | 0.1111111111 |  | 0.6842105263 | #DIV/0! |
| INC0264 | 0.09523809524 | 0.09523809524 | 0.2222222222 |  | 0.2894736842 | #DIV/0! |
| INC0264 | 0             | 0             | 0.1666666667 |  | 0            | #DIV/0! |
| INC0264 | 0.1428571429  | 0.1428571429  | 0            |  | inf          | #DIV/0! |
| INC0264 | 0.09523809524 | 0.09523809524 | 0.1111111111 |  | 0.6842105263 | #DIV/0! |
| INC0264 | 0.09523809524 | 0.09523809524 | 0.1111111111 |  | 0.6842105263 | #DIV/0! |
| INC0265 | 0.1428571429  | 0.1428571429  | 0            |  | inf          | #DIV/0! |
| INC0265 | 0.09523809524 | 0.09523809524 | 0.1111111111 |  | 0.6842105263 | #DIV/0! |
| INC0265 | 0.1428571429  | 0.1428571429  | 0.1111111111 |  | 1.083333333  | #DIV/0! |
| INC0265 | 0.1428571429  | 0.1428571429  | 0            |  | inf          | #DIV/0! |
| INC0265 | 0.09523809524 | 0.09523809524 | 0.1111111111 |  | 0.6842105263 | #DIV/0! |
| INC0265 | 0             | 0             | 0.1666666667 |  | 0            | #DIV/0! |
| INC0265 | 0.1428571429  | 0.1428571429  | 0.0555555556 |  | 2.333333333  | #DIV/0! |
| INC0266 | 0.09523809524 | 0.09523809524 | 0.2222222222 |  | 0.2894736842 | #DIV/0! |
| INC0266 | 0.2857142857  | 0.2857142857  | 0            |  | inf          | #DIV/0! |
| INC0266 | 0.04761904762 | 0.04761904762 | 0.1666666667 |  | 0.2          | #DIV/0! |
| INC0267 | 0.09523809524 | 0.09523809524 | 0.1111111111 |  | 0.6842105263 | #DIV/0! |
| INC0267 | 0.1428571429  | 0.1428571429  | 0.0555555556 |  | 2.333333333  | #DIV/0! |
| INC0267 | 0.09523809524 | 0.09523809524 | 0.1111111111 |  | 0.6842105263 | #DIV/0! |
| INC0267 | 0.1428571429  | 0.1428571429  | 0.0555555556 |  | 2.333333333  | #DIV/0! |
| INC0268 | 0.1428571429  | 0.1428571429  | 0            |  | inf          | #DIV/0! |
| INC0268 | 0.04761904762 | 0.04761904762 | 0            |  | inf          | #DIV/0! |
| INC0269 | 0.1428571429  | 0.1428571429  | 0.0555555556 |  | 2.333333333  | #DIV/0! |
| INC2190 | 0.04761904762 | 0.04761904762 | 0            |  | inf          | #DIV/0! |
| INCAD0  | 0.04761904762 | 0.04761904762 | 0            |  | inf          | #DIV/0! |
| INCMD0  | 0.04761904762 | 0.04761904762 | 0            |  | inf          | #DIV/0! |
| NCR-000 | 0.09523809524 | 0.09523809524 | 0.1111111111 |  | 0.6842105263 | #DIV/0! |
| NCR-000 | 0.09523809524 | 0.09523809524 | 0.0555555556 |  | 1.473684211  | #DIV/0! |
| NCR-000 | 0.04761904762 | 0.04761904762 | 0            |  | inf          | #DIV/0! |

|        |               |               |               |  |              |         |
|--------|---------------|---------------|---------------|--|--------------|---------|
| LINGO1 | 0.04761904762 | 0.04761904762 | 0.05555555556 |  | 0.7          | #DIV/0! |
| NGO1-A | 0.04761904762 | 0.04761904762 | 0.05555555556 |  | 0.7          | #DIV/0! |
| NGO1-A | 0.04761904762 | 0.04761904762 | 0.05555555556 |  | 0.7          | #DIV/0! |
| LINGO2 | 0.09523809524 | 0.09523809524 | 0.05555555556 |  | 1.473684211  | #DIV/0! |
| LINGO3 | 0.09523809524 | 0.09523809524 | 0.11111111111 |  | 0.6842105263 | #DIV/0! |
| LINGO4 | 0.1904761905  | 0.1904761905  | 0             |  | inf          | #DIV/0! |
| LINP1  | 0.09523809524 | 0.09523809524 | 0.11111111111 |  | 0.6842105263 | #DIV/0! |
| LINS1  | 0.04761904762 | 0.04761904762 | 0.05555555556 |  | 0.7          | #DIV/0! |
| LIPA   | 0.1428571429  | 0.1428571429  | 0.16666666667 |  | 0.6666666667 | #DIV/0! |
| LIPC   | 0.04761904762 | 0.04761904762 | 0.05555555556 |  | 0.7          | #DIV/0! |
| IPC-AS | 0.04761904762 | 0.04761904762 | 0.05555555556 |  | 0.7          | #DIV/0! |
| LIPE   | 0.04761904762 | 0.04761904762 | 0.05555555556 |  | 0.7          | #DIV/0! |
| IPE-AS | 0.04761904762 | 0.04761904762 | 0.05555555556 |  | 0.7          | #DIV/0! |
| LIPF   | 0.1428571429  | 0.1428571429  | 0.16666666667 |  | 0.6666666667 | #DIV/0! |
| LIPG   | 0.04761904762 | 0.04761904762 | 0             |  | inf          | #DIV/0! |
| LIPH   | 0.1428571429  | 0.1428571429  | 0.05555555556 |  | 2.333333333  | #DIV/0! |
| LIPI   | 0.04761904762 | 0.04761904762 | 0.11111111111 |  | 0.325        | #DIV/0! |
| LIPJ   | 0.1428571429  | 0.1428571429  | 0.16666666667 |  | 0.6666666667 | #DIV/0! |
| LIPK   | 0.1428571429  | 0.1428571429  | 0.16666666667 |  | 0.6666666667 | #DIV/0! |
| LIPM   | 0.1428571429  | 0.1428571429  | 0.16666666667 |  | 0.6666666667 | #DIV/0! |
| LIPN   | 0.1428571429  | 0.1428571429  | 0.16666666667 |  | 0.6666666667 | #DIV/0! |
| LIPT1  | 0             | 0             | 0.05555555556 |  | 0            | #DIV/0! |
| LITAF  | 0.04761904762 | 0.04761904762 | 0             |  | inf          | #DIV/0! |
| LIX1   | 0.04761904762 | 0.04761904762 | 0             |  | inf          | #DIV/0! |
| AAEA1  | 0.1428571429  | 0.1428571429  | 0.22222222222 |  | 0.4583333333 | #DIV/0! |
| NC01-8 | 0             | 0             | 0.11111111111 |  | 0            | #DIV/0! |
| NC03-6 | 0.04761904762 | 0.04761904762 | 0.05555555556 |  | 0.7          | #DIV/0! |
| LLCFC1 | 0.04761904762 | 0.04761904762 | 0.05555555556 |  | 0.7          | #DIV/0! |
| LLPH   | 0.09523809524 | 0.09523809524 | 0.05555555556 |  | 1.473684211  | #DIV/0! |
| LPH-D  | 0.09523809524 | 0.09523809524 | 0.05555555556 |  | 1.473684211  | #DIV/0! |
| LMAN1  | 0.09523809524 | 0.09523809524 | 0             |  | inf          | #DIV/0! |
| LMAN11 | 0.04761904762 | 0.04761904762 | 0.05555555556 |  | 0.7          | #DIV/0! |
| LMAN2  | 0.09523809524 | 0.09523809524 | 0.05555555556 |  | 1.473684211  | #DIV/0! |
| LMAN21 | 0             | 0             | 0.11111111111 |  | 0            | #DIV/0! |
| LMBR1  | 0.1428571429  | 0.1428571429  | 0.05555555556 |  | 2.333333333  | #DIV/0! |
| LMBR11 | 0.04761904762 | 0.04761904762 | 0.05555555556 |  | 0.7          | #DIV/0! |
| LMBRD  | 0.04761904762 | 0.04761904762 | 0.05555555556 |  | 0.7          | #DIV/0! |
| LMCD1  | 0.04761904762 | 0.04761904762 | 0             |  | inf          | #DIV/0! |
| ICD1-A | 0.04761904762 | 0.04761904762 | 0             |  | inf          | #DIV/0! |
| LMF1   | 0.04761904762 | 0.04761904762 | 0.22222222222 |  | 0.1375       | #DIV/0! |
| MF1-AS | 0.04761904762 | 0.04761904762 | 0.22222222222 |  | 0.1375       | #DIV/0! |
| LMF2   | 0             | 0             | 0.11111111111 |  | 0            | #DIV/0! |
| LMLN   | 0.1428571429  | 0.1428571429  | 0.05555555556 |  | 2.333333333  | #DIV/0! |
| MLN-AS | 0.1428571429  | 0.1428571429  | 0.05555555556 |  | 2.333333333  | #DIV/0! |
| LMLN2  | 0             | 0             | 0.05555555556 |  | 0            | #DIV/0! |
| LMNA   | 0.1428571429  | 0.1428571429  | 0.11111111111 |  | 1.083333333  | #DIV/0! |
| LMNB1  | 0.04761904762 | 0.04761904762 | 0             |  | inf          | #DIV/0! |
| MNB1-D | 0.04761904762 | 0.04761904762 | 0             |  | inf          | #DIV/0! |
| LMNB2  | 0.09523809524 | 0.09523809524 | 0.05555555556 |  | 1.473684211  | #DIV/0! |
| LMNTD  | 0.04761904762 | 0.04761904762 | 0.05555555556 |  | 0.7          | #DIV/0! |
| LMNTD  | 0.04761904762 | 0.04761904762 | 0             |  | inf          | #DIV/0! |

|         |               |               |               |  |              |         |
|---------|---------------|---------------|---------------|--|--------------|---------|
| LMO3    | 0.04761904762 | 0.04761904762 | 0.1111111111  |  | 0.325        | #DIV/0! |
| LMO4    | 0.04761904762 | 0.04761904762 | 0.05555555556 |  | 0.7          | #DIV/0! |
| LMO7    | 0             | 0             | 0.05555555556 |  | 0            | #DIV/0! |
| MO7-AS  | 0             | 0             | 0.05555555556 |  | 0            | #DIV/0! |
| MO7DN   | 0             | 0             | 0.05555555556 |  | 0            | #DIV/0! |
| IO7DN-I | 0             | 0             | 0.05555555556 |  | 0            | #DIV/0! |
| LMOD1   | 0.1428571429  | 0.1428571429  | 0             |  | inf          | #DIV/0! |
| LMOD2   | 0.04761904762 | 0.04761904762 | 0.05555555556 |  | 0.7          | #DIV/0! |
| LMOD3   | 0.04761904762 | 0.04761904762 | 0             |  | inf          | #DIV/0! |
| LMTK2   | 0.04761904762 | 0.04761904762 | 0.05555555556 |  | 0.7          | #DIV/0! |
| LMTK3   | 0.09523809524 | 0.09523809524 | 0.1111111111  |  | 0.6842105263 | #DIV/0! |
| LMX1A   | 0.1428571429  | 0.1428571429  | 0             |  | inf          | #DIV/0! |
| LMX1B   | 0.09523809524 | 0.09523809524 | 0.05555555556 |  | 1.473684211  | #DIV/0! |
| NCARO   | 0.04761904762 | 0.04761904762 | 0.05555555556 |  | 0.7          | #DIV/0! |
| LNCNEI  | 0.1904761905  | 0.1904761905  | 0.05555555556 |  | 3.294117647  | #DIV/0! |
| LNCOCI  | 0.04761904762 | 0.04761904762 | 0.1666666667  |  | 0.2          | #DIV/0! |
| LNCOG   | 0.04761904762 | 0.04761904762 | 0.1111111111  |  | 0.325        | #DIV/0! |
| CPRES   | 0.04761904762 | 0.04761904762 | 0.05555555556 |  | 0.7          | #DIV/0! |
| CPRES   | 0             | 0             | 0.05555555556 |  | 0            | #DIV/0! |
| CRNA-A  | 0.1428571429  | 0.1428571429  | 0.1111111111  |  | 1.083333333  | #DIV/0! |
| NCSRL   | 0.1428571429  | 0.1428571429  | 0.1111111111  |  | 1.083333333  | #DIV/0! |
| CTAM3   | 0             | 0             | 0.05555555556 |  | 0            | #DIV/0! |
| LNPI    | 0.09523809524 | 0.09523809524 | 0.05555555556 |  | 1.473684211  | #DIV/0! |
| LNPEP   | 0.04761904762 | 0.04761904762 | 0             |  | inf          | #DIV/0! |
| LNPK    | 0             | 0             | 0.1111111111  |  | 0            | #DIV/0! |
| LNX1    | 0.2380952381  | 0.2380952381  | 0.05555555556 |  | 4.375        | #DIV/0! |
| NX1-AS  | 0.2380952381  | 0.2380952381  | 0.05555555556 |  | 4.375        | #DIV/0! |
| NX1-AS  | 0.2380952381  | 0.2380952381  | 0.05555555556 |  | 4.375        | #DIV/0! |
| C10049  | 0.04761904762 | 0.04761904762 | 0.1111111111  |  | 0.325        | #DIV/0! |
| C100101 | 0.1428571429  | 0.1428571429  | 0.1111111111  |  | 1.083333333  | #DIV/0! |
| C100128 | 0.04761904762 | 0.04761904762 | 0.05555555556 |  | 0.7          | #DIV/0! |
| C100128 | 0             | 0             | 0.05555555556 |  | 0            | #DIV/0! |
| C100128 | 0.04761904762 | 0.04761904762 | 0.05555555556 |  | 0.7          | #DIV/0! |
| C100128 | 0.04761904762 | 0.04761904762 | 0             |  | inf          | #DIV/0! |
| C100128 | 0.04761904762 | 0.04761904762 | 0.05555555556 |  | 0.7          | #DIV/0! |
| C100128 | 0.1904761905  | 0.1904761905  | 0.05555555556 |  | 3.294117647  | #DIV/0! |
| C100128 | 0.04761904762 | 0.04761904762 | 0.1666666667  |  | 0.2          | #DIV/0! |
| C100128 | 0.04761904762 | 0.04761904762 | 0.05555555556 |  | 0.7          | #DIV/0! |
| C100128 | 0.1428571429  | 0.1428571429  | 0.1111111111  |  | 1.083333333  | #DIV/0! |
| C100128 | 0.04761904762 | 0.04761904762 | 0.1666666667  |  | 0.2          | #DIV/0! |
| C100128 | 0.04761904762 | 0.04761904762 | 0.05555555556 |  | 0.7          | #DIV/0! |
| C100128 | 0.09523809524 | 0.09523809524 | 0.05555555556 |  | 1.473684211  | #DIV/0! |
| C100128 | 0.04761904762 | 0.04761904762 | 0.05555555556 |  | 0.7          | #DIV/0! |
| C100128 | 0.1428571429  | 0.1428571429  | 0.05555555556 |  | 2.333333333  | #DIV/0! |
| C100128 | 0.04761904762 | 0.04761904762 | 0.05555555556 |  | 0.7          | #DIV/0! |
| C100128 | 0.1428571429  | 0.1428571429  | 0.05555555556 |  | 2.333333333  | #DIV/0! |
| C100128 | 0.1428571429  | 0.1428571429  | 0.05555555556 |  | 2.333333333  | #DIV/0! |
| C100128 | 0.04761904762 | 0.04761904762 | 0.1666666667  |  | 0.2          | #DIV/0! |
| C100128 | 0.04761904762 | 0.04761904762 | 0.1111111111  |  | 0.325        | #DIV/0! |
| C100128 | 0.1428571429  | 0.1428571429  | 0             |  | inf          | #DIV/0! |
| C100128 | 0.04761904762 | 0.04761904762 | 0.05555555556 |  | 0.7          | #DIV/0! |

|         |               |               |              |              |         |
|---------|---------------|---------------|--------------|--------------|---------|
| C100128 | 0.04761904762 | 0.04761904762 | 0            | inf          | #DIV/0! |
| C100128 | 0.1428571429  | 0.1428571429  | 0.1666666667 | 0.6666666667 | #DIV/0! |
| C100128 | 0.09523809524 | 0.09523809524 | 0.1111111111 | 0.6842105263 | #DIV/0! |
| C100129 | 0.04761904762 | 0.04761904762 | 0.1111111111 | 0.325        | #DIV/0! |
| C100129 | 0.09523809524 | 0.09523809524 | 0.0555555556 | 1.473684211  | #DIV/0! |
| C100129 | 0.04761904762 | 0.04761904762 | 0.0555555556 | 0.7          | #DIV/0! |
| C100129 | 0.09523809524 | 0.09523809524 | 0.1111111111 | 0.6842105263 | #DIV/0! |
| C100129 | 0.09523809524 | 0.09523809524 | 0.1111111111 | 0.6842105263 | #DIV/0! |
| C100129 | 0.04761904762 | 0.04761904762 | 0.0555555556 | 0.7          | #DIV/0! |
| C100129 | 0.04761904762 | 0.04761904762 | 0.0555555556 | 0.7          | #DIV/0! |
| C100129 | 0             | 0             | 0.0555555556 | 0            | #DIV/0! |
| C100129 | 0.04761904762 | 0.04761904762 | 0.0555555556 | 0.7          | #DIV/0! |
| C100129 | 0.04761904762 | 0.04761904762 | 0.0555555556 | 0.7          | #DIV/0! |
| C100129 | 0.04761904762 | 0.04761904762 | 0.1666666667 | 0.2          | #DIV/0! |
| C100129 | 0             | 0             | 0.1111111111 | 0            | #DIV/0! |
| C100129 | 0.04761904762 | 0.04761904762 | 0.0555555556 | 0.7          | #DIV/0! |
| C100129 | 0.09523809524 | 0.09523809524 | 0.1666666667 | 0.4210526316 | #DIV/0! |
| C100129 | 0.04761904762 | 0.04761904762 | 0            | inf          | #DIV/0! |
| C100129 | 0.04761904762 | 0.04761904762 | 0.0555555556 | 0.7          | #DIV/0! |
| C100129 | 0.1904761905  | 0.1904761905  | 0            | inf          | #DIV/0! |
| C100129 | 0.04761904762 | 0.04761904762 | 0            | inf          | #DIV/0! |
| C100129 | 0.04761904762 | 0.04761904762 | 0            | inf          | #DIV/0! |
| C100129 | 0.04761904762 | 0.04761904762 | 0.0555555556 | 0.7          | #DIV/0! |
| C100130 | 0.09523809524 | 0.09523809524 | 0.2222222222 | 0.2894736842 | #DIV/0! |
| C100130 | 0.09523809524 | 0.09523809524 | 0.1111111111 | 0.6842105263 | #DIV/0! |
| C100130 | 0.04761904762 | 0.04761904762 | 0            | inf          | #DIV/0! |
| C100130 | 0.04761904762 | 0.04761904762 | 0            | inf          | #DIV/0! |
| C100130 | 0.09523809524 | 0.09523809524 | 0.0555555556 | 1.473684211  | #DIV/0! |
| C100130 | 0.1904761905  | 0.1904761905  | 0.0555555556 | 3.294117647  | #DIV/0! |
| C100130 | 0.04761904762 | 0.04761904762 | 0.1111111111 | 0.325        | #DIV/0! |
| C100130 | 0.09523809524 | 0.09523809524 | 0            | inf          | #DIV/0! |
| C100130 | 0.1428571429  | 0.1428571429  | 0.1666666667 | 0.6666666667 | #DIV/0! |
| C100130 | 0.1428571429  | 0.1428571429  | 0            | inf          | #DIV/0! |
| C100130 | 0.04761904762 | 0.04761904762 | 0            | inf          | #DIV/0! |
| C100130 | 0.09523809524 | 0.09523809524 | 0.1111111111 | 0.6842105263 | #DIV/0! |
| C100130 | 0.04761904762 | 0.04761904762 | 0.0555555556 | 0.7          | #DIV/0! |
| C100130 | 0             | 0             | 0.0555555556 | 0            | #DIV/0! |
| C100130 | 0             | 0             | 0.0555555556 | 0            | #DIV/0! |
| C100130 | 0.04761904762 | 0.04761904762 | 0            | inf          | #DIV/0! |
| C100130 | 0.04761904762 | 0.04761904762 | 0            | inf          | #DIV/0! |
| C100130 | 0.1428571429  | 0.1428571429  | 0.2222222222 | 0.4583333333 | #DIV/0! |
| C100130 | 0.04761904762 | 0.04761904762 | 0.1666666667 | 0.2          | #DIV/0! |
| C100130 | 0             | 0             | 0.1111111111 | 0            | #DIV/0! |
| C100130 | 0.1428571429  | 0.1428571429  | 0            | inf          | #DIV/0! |
| C100130 | 0.04761904762 | 0.04761904762 | 0.0555555556 | 0.7          | #DIV/0! |
| C100130 | 0.1428571429  | 0.1428571429  | 0.1666666667 | 0.6666666667 | #DIV/0! |
| C100130 | 0.04761904762 | 0.04761904762 | 0            | inf          | #DIV/0! |
| C100130 | 0.04761904762 | 0.04761904762 | 0.0555555556 | 0.7          | #DIV/0! |
| C100130 | 0             | 0             | 0.1111111111 | 0            | #DIV/0! |
| C100130 | 0             | 0             | 0.1111111111 | 0            | #DIV/0! |
| C100130 | 0.09523809524 | 0.09523809524 | 0.1111111111 | 0.6842105263 | #DIV/0! |

|         |               |               |               |  |              |         |
|---------|---------------|---------------|---------------|--|--------------|---------|
| C100130 | 0.09523809524 | 0.09523809524 | 0.1111111111  |  | 0.6842105263 | #DIV/0! |
| C100131 | 0.04761904762 | 0.04761904762 | 0.05555555556 |  | 0.7          | #DIV/0! |
| C100131 | 0.1904761905  | 0.1904761905  | 0             |  | inf          | #DIV/0! |
| C100131 | 0.04761904762 | 0.04761904762 | 0.1666666667  |  | 0.2          | #DIV/0! |
| C100131 | 0.04761904762 | 0.04761904762 | 0.2222222222  |  | 0.1375       | #DIV/0! |
| C100131 | 0.1428571429  | 0.1428571429  | 0.1666666667  |  | 0.6666666667 | #DIV/0! |
| C100131 | 0             | 0             | 0.05555555556 |  | 0            | #DIV/0! |
| C100131 | 0.09523809524 | 0.09523809524 | 0.1111111111  |  | 0.6842105263 | #DIV/0! |
| C100132 | 0.1428571429  | 0.1428571429  | 0.05555555556 |  | 2.333333333  | #DIV/0! |
| C100132 | 0.09523809524 | 0.09523809524 | 0.1666666667  |  | 0.4210526316 | #DIV/0! |
| C100132 | 0.04761904762 | 0.04761904762 | 0.05555555556 |  | 0.7          | #DIV/0! |
| C100132 | 0             | 0             | 0.05555555556 |  | 0            | #DIV/0! |
| C100132 | 0.09523809524 | 0.09523809524 | 0.2222222222  |  | 0.2894736842 | #DIV/0! |
| C100132 | 0.09523809524 | 0.09523809524 | 0.1666666667  |  | 0.4210526316 | #DIV/0! |
| C100132 | 0.04761904762 | 0.04761904762 | 0.05555555556 |  | 0.7          | #DIV/0! |
| C100132 | 0.04761904762 | 0.04761904762 | 0             |  | inf          | #DIV/0! |
| C100132 | 0.1904761905  | 0.1904761905  | 0.1111111111  |  | 1.529411765  | #DIV/0! |
| C100133 | 0.04761904762 | 0.04761904762 | 0             |  | inf          | #DIV/0! |
| C100133 | 0.09523809524 | 0.09523809524 | 0             |  | inf          | #DIV/0! |
| C100133 | 0.09523809524 | 0.09523809524 | 0.1111111111  |  | 0.6842105263 | #DIV/0! |
| C100133 | 0.04761904762 | 0.04761904762 | 0.1666666667  |  | 0.2          | #DIV/0! |
| C100133 | 0.04761904762 | 0.04761904762 | 0.1666666667  |  | 0.2          | #DIV/0! |
| C100133 | 0.09523809524 | 0.09523809524 | 0.2222222222  |  | 0.2894736842 | #DIV/0! |
| C100134 | 0.09523809524 | 0.09523809524 | 0.05555555556 |  | 1.473684211  | #DIV/0! |
| C100134 | 0.04761904762 | 0.04761904762 | 0.05555555556 |  | 0.7          | #DIV/0! |
| C100134 | 0.04761904762 | 0.04761904762 | 0.2222222222  |  | 0.1375       | #DIV/0! |
| C100134 | 0.04761904762 | 0.04761904762 | 0             |  | inf          | #DIV/0! |
| C100134 | 0.1904761905  | 0.1904761905  | 0.05555555556 |  | 3.294117647  | #DIV/0! |
| C100144 | 0             | 0             | 0.05555555556 |  | 0            | #DIV/0! |
| C100190 | 0.04761904762 | 0.04761904762 | 0             |  | inf          | #DIV/0! |
| C100192 | 0.09523809524 | 0.09523809524 | 0             |  | inf          | #DIV/0! |
| C100240 | 0.1428571429  | 0.1428571429  | 0.1666666667  |  | 0.6666666667 | #DIV/0! |
| C100240 | 0.04761904762 | 0.04761904762 | 0.05555555556 |  | 0.7          | #DIV/0! |
| C100240 | 0.04761904762 | 0.04761904762 | 0.05555555556 |  | 0.7          | #DIV/0! |
| C100268 | 0             | 0             | 0.05555555556 |  | 0            | #DIV/0! |
| C100272 | 0.09523809524 | 0.09523809524 | 0.05555555556 |  | 1.473684211  | #DIV/0! |
| C100286 | 0.1428571429  | 0.1428571429  | 0.05555555556 |  | 2.333333333  | #DIV/0! |
| C100286 | 0             | 0             | 0.05555555556 |  | 0            | #DIV/0! |
| C100286 | 0.04761904762 | 0.04761904762 | 0.05555555556 |  | 0.7          | #DIV/0! |
| C100287 | 0             | 0             | 0.05555555556 |  | 0            | #DIV/0! |
| C100287 | 0.09523809524 | 0.09523809524 | 0.1111111111  |  | 0.6842105263 | #DIV/0! |
| C100287 | 0.09523809524 | 0.09523809524 | 0             |  | inf          | #DIV/0! |
| C100287 | 0.04761904762 | 0.04761904762 | 0.05555555556 |  | 0.7          | #DIV/0! |
| C100287 | 0.1428571429  | 0.1428571429  | 0             |  | inf          | #DIV/0! |
| C100287 | 0.09523809524 | 0.09523809524 | 0.05555555556 |  | 1.473684211  | #DIV/0! |
| C100287 | 0.04761904762 | 0.04761904762 | 0.2222222222  |  | 0.1375       | #DIV/0! |
| C100287 | 0.04761904762 | 0.04761904762 | 0             |  | inf          | #DIV/0! |
| C100287 | 0             | 0             | 0.05555555556 |  | 0            | #DIV/0! |
| C100287 | 0.1428571429  | 0.1428571429  | 0.05555555556 |  | 2.333333333  | #DIV/0! |
| C100287 | 0.09523809524 | 0.09523809524 | 0.05555555556 |  | 1.473684211  | #DIV/0! |
| C100287 | 0.1428571429  | 0.1428571429  | 0.1666666667  |  | 0.6666666667 | #DIV/0! |



|         |               |               |               |              |         |
|---------|---------------|---------------|---------------|--------------|---------|
| C100287 | 0.04761904762 | 0.04761904762 | 0             | inf          | #DIV/0! |
| C100287 | 0.09523809524 | 0.09523809524 | 0.05555555556 | 1.473684211  | #DIV/0! |
| C100287 | 0.09523809524 | 0.09523809524 | 0.16666666667 | 0.4210526316 | #DIV/0! |
| C100287 | 0.04761904762 | 0.04761904762 | 0.05555555556 | 0.7          | #DIV/0! |
| C100288 | 0.04761904762 | 0.04761904762 | 0.16666666667 | 0.2          | #DIV/0! |
| C100288 | 0.09523809524 | 0.09523809524 | 0.11111111111 | 0.6842105263 | #DIV/0! |
| C100288 | 0.09523809524 | 0.09523809524 | 0             | inf          | #DIV/0! |
| C100288 | 0             | 0             | 0.11111111111 | 0            | #DIV/0! |
| C100288 | 0             | 0             | 0.05555555556 | 0            | #DIV/0! |
| C100288 | 0             | 0             | 0.05555555556 | 0            | #DIV/0! |
| C100288 | 0             | 0             | 0.11111111111 | 0            | #DIV/0! |
| C100288 | 0.1904761905  | 0.1904761905  | 0.11111111111 | 1.529411765  | #DIV/0! |
| C100288 | 0.04761904762 | 0.04761904762 | 0.05555555556 | 0.7          | #DIV/0! |
| C100288 | 0.04761904762 | 0.04761904762 | 0             | inf          | #DIV/0! |
| C100288 | 0.09523809524 | 0.09523809524 | 0             | inf          | #DIV/0! |
| C100289 | 0.04761904762 | 0.04761904762 | 0             | inf          | #DIV/0! |
| C100289 | 0.1428571429  | 0.1428571429  | 0.11111111111 | 1.083333333  | #DIV/0! |
| C100289 | 0.1428571429  | 0.1428571429  | 0.05555555556 | 2.333333333  | #DIV/0! |
| C100289 | 0.1904761905  | 0.1904761905  | 0.11111111111 | 1.529411765  | #DIV/0! |
| C100289 | 0.04761904762 | 0.04761904762 | 0.05555555556 | 0.7          | #DIV/0! |
| C100289 | 0.1904761905  | 0.1904761905  | 0             | inf          | #DIV/0! |
| C100291 | 0.1428571429  | 0.1428571429  | 0.22222222222 | 0.4583333333 | #DIV/0! |
| C100294 | 0.04761904762 | 0.04761904762 | 0             | inf          | #DIV/0! |
| C100294 | 0.04761904762 | 0.04761904762 | 0             | inf          | #DIV/0! |
| C100303 | 0.04761904762 | 0.04761904762 | 0             | inf          | #DIV/0! |
| C100310 | 0.04761904762 | 0.04761904762 | 0.16666666667 | 0.2          | #DIV/0! |
| C100335 | 0.04761904762 | 0.04761904762 | 0.05555555556 | 0.7          | #DIV/0! |
| C100379 | 0.09523809524 | 0.09523809524 | 0.05555555556 | 1.473684211  | #DIV/0! |
| C100419 | 0             | 0             | 0.05555555556 | 0            | #DIV/0! |
| C100420 | 0.09523809524 | 0.09523809524 | 0.11111111111 | 0.6842105263 | #DIV/0! |
| C100422 | 0.1428571429  | 0.1428571429  | 0             | inf          | #DIV/0! |
| C100422 | 0.04761904762 | 0.04761904762 | 0.05555555556 | 0.7          | #DIV/0! |
| C100499 | 0             | 0             | 0.05555555556 | 0            | #DIV/0! |
| C100499 | 0.09523809524 | 0.09523809524 | 0.11111111111 | 0.6842105263 | #DIV/0! |
| C100500 | 0.1904761905  | 0.1904761905  | 0.16666666667 | 0.9411764706 | #DIV/0! |
| C100505 | 0.1428571429  | 0.1428571429  | 0.16666666667 | 0.6666666667 | #DIV/0! |
| C100505 | 0.09523809524 | 0.09523809524 | 0.22222222222 | 0.2894736842 | #DIV/0! |
| C100505 | 0.09523809524 | 0.09523809524 | 0             | inf          | #DIV/0! |
| C100505 | 0.1428571429  | 0.1428571429  | 0.11111111111 | 1.083333333  | #DIV/0! |
| C100505 | 0.04761904762 | 0.04761904762 | 0.05555555556 | 0.7          | #DIV/0! |
| C100505 | 0.09523809524 | 0.09523809524 | 0.05555555556 | 1.473684211  | #DIV/0! |
| C100505 | 0.04761904762 | 0.04761904762 | 0.05555555556 | 0.7          | #DIV/0! |
| C100505 | 0             | 0             | 0.05555555556 | 0            | #DIV/0! |
| C100505 | 0.04761904762 | 0.04761904762 | 0             | inf          | #DIV/0! |
| C100505 | 0.09523809524 | 0.09523809524 | 0.05555555556 | 1.473684211  | #DIV/0! |
| C100505 | 0             | 0             | 0.11111111111 | 0            | #DIV/0! |
| C100505 | 0             | 0             | 0.11111111111 | 0            | #DIV/0! |
| C100505 | 0             | 0             | 0.05555555556 | 0            | #DIV/0! |
| C100505 | 0.09523809524 | 0.09523809524 | 0             | inf          | #DIV/0! |
| C100505 | 0.1428571429  | 0.1428571429  | 0             | inf          | #DIV/0! |
| C100505 | 0.1428571429  | 0.1428571429  | 0.05555555556 | 2.333333333  | #DIV/0! |

|         |               |               |               |  |              |         |
|---------|---------------|---------------|---------------|--|--------------|---------|
| C100505 | 0.04761904762 | 0.04761904762 | 0             |  | inf          | #DIV/0! |
| C100505 | 0.09523809524 | 0.09523809524 | 0             |  | inf          | #DIV/0! |
| C100505 | 0.04761904762 | 0.04761904762 | 0             |  | inf          | #DIV/0! |
| C100505 | 0.1428571429  | 0.1428571429  | 0             |  | inf          | #DIV/0! |
| C100505 | 0.04761904762 | 0.04761904762 | 0.1666666667  |  | 0.2          | #DIV/0! |
| C100505 | 0.1428571429  | 0.1428571429  | 0.05555555556 |  | 2.333333333  | #DIV/0! |
| C100505 | 0.04761904762 | 0.04761904762 | 0.05555555556 |  | 0.7          | #DIV/0! |
| C100506 | 0.1428571429  | 0.1428571429  | 0             |  | inf          | #DIV/0! |
| C100506 | 0             | 0             | 0             |  |              | #DIV/0! |
| C100506 | 0             | 0             | 0.1111111111  |  | 0            | #DIV/0! |
| C100506 | 0.04761904762 | 0.04761904762 | 0             |  | inf          | #DIV/0! |
| C100506 | 0.1428571429  | 0.1428571429  | 0.05555555556 |  | 2.333333333  | #DIV/0! |
| C100506 | 0.04761904762 | 0.04761904762 | 0.2222222222  |  | 0.1375       | #DIV/0! |
| C100506 | 0.09523809524 | 0.09523809524 | 0.05555555556 |  | 1.473684211  | #DIV/0! |
| C100506 | 0             | 0             | 0.1111111111  |  | 0            | #DIV/0! |
| C100506 | 0             | 0             | 0.05555555556 |  | 0            | #DIV/0! |
| C100506 | 0.04761904762 | 0.04761904762 | 0.05555555556 |  | 0.7          | #DIV/0! |
| C100506 | 0             | 0             | 0.05555555556 |  | 0            | #DIV/0! |
| C100506 | 0.09523809524 | 0.09523809524 | 0.1666666667  |  | 0.4210526316 | #DIV/0! |
| C100506 | 0.04761904762 | 0.04761904762 | 0.1666666667  |  | 0.2          | #DIV/0! |
| C100506 | 0.04761904762 | 0.04761904762 | 0.05555555556 |  | 0.7          | #DIV/0! |
| C100506 | 0.04761904762 | 0.04761904762 | 0             |  | inf          | #DIV/0! |
| C100506 | 0             | 0             | 0.1111111111  |  | 0            | #DIV/0! |
| C100506 | 0             | 0             | 0.05555555556 |  | 0            | #DIV/0! |
| C100506 | 0.04761904762 | 0.04761904762 | 0             |  | inf          | #DIV/0! |
| C100506 | 0.1428571429  | 0.1428571429  | 0.05555555556 |  | 2.333333333  | #DIV/0! |
| C100506 | 0.1428571429  | 0.1428571429  | 0.1666666667  |  | 0.6666666667 | #DIV/0! |
| C100506 | 0             | 0             | 0.1111111111  |  | 0            | #DIV/0! |
| C100506 | 0.04761904762 | 0.04761904762 | 0.1666666667  |  | 0.2          | #DIV/0! |
| C100506 | 0.04761904762 | 0.04761904762 | 0.05555555556 |  | 0.7          | #DIV/0! |
| C100506 | 0.04761904762 | 0.04761904762 | 0.05555555556 |  | 0.7          | #DIV/0! |
| C100506 | 0.2380952381  | 0.2380952381  | 0.05555555556 |  | 4.375        | #DIV/0! |
| C100506 | 0             | 0             | 0.1111111111  |  | 0            | #DIV/0! |
| C100506 | 0             | 0             | 0.05555555556 |  | 0            | #DIV/0! |
| C100506 | 0.09523809524 | 0.09523809524 | 0             |  | inf          | #DIV/0! |
| C100506 | 0.04761904762 | 0.04761904762 | 0.2222222222  |  | 0.1375       | #DIV/0! |
| C100506 | 0             | 0             | 0.1111111111  |  | 0            | #DIV/0! |
| C100506 | 0             | 0             | 0.05555555556 |  | 0            | #DIV/0! |
| C100506 | 0.1428571429  | 0.1428571429  | 0             |  | inf          | #DIV/0! |
| C100506 | 0.1428571429  | 0.1428571429  | 0.05555555556 |  | 2.333333333  | #DIV/0! |
| C100506 | 0.04761904762 | 0.04761904762 | 0.05555555556 |  | 0.7          | #DIV/0! |
| C100506 | 0.04761904762 | 0.04761904762 | 0.05555555556 |  | 0.7          | #DIV/0! |
| C100506 | 0             | 0             | 0.1666666667  |  | 0            | #DIV/0! |
| C100506 | 0.04761904762 | 0.04761904762 | 0.05555555556 |  | 0.7          | #DIV/0! |
| C100506 | 0             | 0             | 0.05555555556 |  | 0            | #DIV/0! |
| C100506 | 0.04761904762 | 0.04761904762 | 0.1111111111  |  | 0.325        | #DIV/0! |
| C100506 | 0.04761904762 | 0.04761904762 | 0.2222222222  |  | 0.1375       | #DIV/0! |
| C100506 | 0.04761904762 | 0.04761904762 | 0.1111111111  |  | 0.325        | #DIV/0! |
| C100506 | 0.1428571429  | 0.1428571429  | 0             |  | inf          | #DIV/0! |
| C100506 | 0.04761904762 | 0.04761904762 | 0.1111111111  |  | 0.325        | #DIV/0! |
| C100506 | 0             | 0             | 0.1111111111  |  | 0            | #DIV/0! |

|         |               |               |               |  |              |         |
|---------|---------------|---------------|---------------|--|--------------|---------|
| C100506 | 0.09523809524 | 0.09523809524 | 0             |  | inf          | #DIV/0! |
| C100506 | 0.04761904762 | 0.04761904762 | 0.05555555556 |  | 0.7          | #DIV/0! |
| C100506 | 0.04761904762 | 0.04761904762 | 0.11111111111 |  | 0.325        | #DIV/0! |
| C100506 | 0.09523809524 | 0.09523809524 | 0.11111111111 |  | 0.6842105263 | #DIV/0! |
| C100507 | 0.04761904762 | 0.04761904762 | 0             |  | inf          | #DIV/0! |
| C100507 | 0             | 0             | 0.05555555556 |  | 0            | #DIV/0! |
| C100507 | 0             | 0             | 0.05555555556 |  | 0            | #DIV/0! |
| C100507 | 0.09523809524 | 0.09523809524 | 0.05555555556 |  | 1.473684211  | #DIV/0! |
| C100507 | 0.09523809524 | 0.09523809524 | 0.11111111111 |  | 0.6842105263 | #DIV/0! |
| C100507 | 0.04761904762 | 0.04761904762 | 0.11111111111 |  | 0.325        | #DIV/0! |
| C100507 | 0.09523809524 | 0.09523809524 | 0.05555555556 |  | 1.473684211  | #DIV/0! |
| C100507 | 0.1428571429  | 0.1428571429  | 0.05555555556 |  | 2.333333333  | #DIV/0! |
| C100507 | 0             | 0             | 0.05555555556 |  | 0            | #DIV/0! |
| C100507 | 0.04761904762 | 0.04761904762 | 0.05555555556 |  | 0.7          | #DIV/0! |
| C100507 | 0.04761904762 | 0.04761904762 | 0             |  | inf          | #DIV/0! |
| C100507 | 0.1428571429  | 0.1428571429  | 0.11111111111 |  | 1.083333333  | #DIV/0! |
| C100507 | 0.04761904762 | 0.04761904762 | 0.05555555556 |  | 0.7          | #DIV/0! |
| C100507 | 0.04761904762 | 0.04761904762 | 0.05555555556 |  | 0.7          | #DIV/0! |
| C100507 | 0.09523809524 | 0.09523809524 | 0.05555555556 |  | 1.473684211  | #DIV/0! |
| C100507 | 0.1428571429  | 0.1428571429  | 0.05555555556 |  | 2.333333333  | #DIV/0! |
| C100507 | 0             | 0             | 0.05555555556 |  | 0            | #DIV/0! |
| C100507 | 0.09523809524 | 0.09523809524 | 0.11111111111 |  | 0.6842105263 | #DIV/0! |
| C100507 | 0.04761904762 | 0.04761904762 | 0.05555555556 |  | 0.7          | #DIV/0! |
| C100507 | 0.04761904762 | 0.04761904762 | 0.05555555556 |  | 0.7          | #DIV/0! |
| C100507 | 0.09523809524 | 0.09523809524 | 0.11111111111 |  | 0.6842105263 | #DIV/0! |
| C100507 | 0.04761904762 | 0.04761904762 | 0             |  | inf          | #DIV/0! |
| C100507 | 0.04761904762 | 0.04761904762 | 0.05555555556 |  | 0.7          | #DIV/0! |
| C100507 | 0.04761904762 | 0.04761904762 | 0.05555555556 |  | 0.7          | #DIV/0! |
| C100507 | 0.04761904762 | 0.04761904762 | 0.05555555556 |  | 0.7          | #DIV/0! |
| C100507 | 0.04761904762 | 0.04761904762 | 0.05555555556 |  | 0.7          | #DIV/0! |
| C100507 | 0.04761904762 | 0.04761904762 | 0.16666666667 |  | 0.2          | #DIV/0! |
| C100508 | 0.1428571429  | 0.1428571429  | 0.11111111111 |  | 1.083333333  | #DIV/0! |
| C100630 | 0.04761904762 | 0.04761904762 | 0.05555555556 |  | 0.7          | #DIV/0! |
| C100631 | 0.04761904762 | 0.04761904762 | 0.05555555556 |  | 0.7          | #DIV/0! |
| C100652 | 0.04761904762 | 0.04761904762 | 0.05555555556 |  | 0.7          | #DIV/0! |
| C100996 | 0.04761904762 | 0.04761904762 | 0.05555555556 |  | 0.7          | #DIV/0! |
| C100996 | 0.04761904762 | 0.04761904762 | 0.05555555556 |  | 0.7          | #DIV/0! |
| C100996 | 0.04761904762 | 0.04761904762 | 0.05555555556 |  | 0.7          | #DIV/0! |
| C100996 | 0.04761904762 | 0.04761904762 | 0.11111111111 |  | 0.325        | #DIV/0! |
| C100996 | 0             | 0             | 0.05555555556 |  | 0            | #DIV/0! |
| C100996 | 0.09523809524 | 0.09523809524 | 0             |  | inf          | #DIV/0! |
| C100996 | 0.09523809524 | 0.09523809524 | 0.05555555556 |  | 1.473684211  | #DIV/0! |
| C100996 | 0.04761904762 | 0.04761904762 | 0.05555555556 |  | 0.7          | #DIV/0! |
| C100996 | 0.09523809524 | 0.09523809524 | 0.05555555556 |  | 1.473684211  | #DIV/0! |
| C100996 | 0.04761904762 | 0.04761904762 | 0.11111111111 |  | 0.325        | #DIV/0! |
| C100996 | 0.1428571429  | 0.1428571429  | 0.05555555556 |  | 2.333333333  | #DIV/0! |
| C100996 | 0             | 0             | 0.11111111111 |  | 0            | #DIV/0! |
| C100996 | 0.09523809524 | 0.09523809524 | 0.22222222222 |  | 0.2894736842 | #DIV/0! |
| C100996 | 0.380952381   | 0.380952381   | 0.22222222222 |  | 1.692307692  | #DIV/0! |
| C100996 | 0             | 0             | 0.16666666667 |  | 0            | #DIV/0! |
| C100996 | 0.09523809524 | 0.09523809524 | 0.05555555556 |  | 1.473684211  | #DIV/0! |

|         |               |               |               |  |              |         |
|---------|---------------|---------------|---------------|--|--------------|---------|
| C100996 | 0.09523809524 | 0.09523809524 | 0.05555555556 |  | 1.473684211  | #DIV/0! |
| C100996 | 0.09523809524 | 0.09523809524 | 0.05555555556 |  | 1.473684211  | #DIV/0! |
| C100996 | 0.1428571429  | 0.1428571429  | 0.05555555556 |  | 2.333333333  | #DIV/0! |
| C100996 | 0.09523809524 | 0.09523809524 | 0             |  | inf          | #DIV/0! |
| C100996 | 0             | 0             | 0.05555555556 |  | 0            | #DIV/0! |
| C101059 | 0.09523809524 | 0.09523809524 | 0.1111111111  |  | 0.6842105263 | #DIV/0! |
| C101060 | 0.1428571429  | 0.1428571429  | 0.05555555556 |  | 2.333333333  | #DIV/0! |
| C101241 | 0.1428571429  | 0.1428571429  | 0.1111111111  |  | 1.083333333  | #DIV/0! |
| C101409 | 0.09523809524 | 0.09523809524 | 0.1111111111  |  | 0.6842105263 | #DIV/0! |
| C101448 | 0.04761904762 | 0.04761904762 | 0             |  | inf          | #DIV/0! |
| C101559 | 0             | 0             | 0.1111111111  |  | 0            | #DIV/0! |
| C101593 | 0.04761904762 | 0.04761904762 | 0.1111111111  |  | 0.325        | #DIV/0! |
| C101926 | 0.1904761905  | 0.1904761905  | 0.05555555556 |  | 3.294117647  | #DIV/0! |
| C101926 | 0.1904761905  | 0.1904761905  | 0.1666666667  |  | 0.9411764706 | #DIV/0! |
| C101926 | 0.04761904762 | 0.04761904762 | 0.05555555556 |  | 0.7          | #DIV/0! |
| C101926 | 0.04761904762 | 0.04761904762 | 0             |  | inf          | #DIV/0! |
| C101926 | 0.1904761905  | 0.1904761905  | 0.1666666667  |  | 0.9411764706 | #DIV/0! |
| C101926 | 0             | 0             | 0.05555555556 |  | 0            | #DIV/0! |
| C101926 | 0.04761904762 | 0.04761904762 | 0.05555555556 |  | 0.7          | #DIV/0! |
| C101926 | 0             | 0             | 0.05555555556 |  | 0            | #DIV/0! |
| C101926 | 0.04761904762 | 0.04761904762 | 0.05555555556 |  | 0.7          | #DIV/0! |
| C101926 | 0.1904761905  | 0.1904761905  | 0.05555555556 |  | 3.294117647  | #DIV/0! |
| C101926 | 0.1428571429  | 0.1428571429  | 0.1666666667  |  | 0.6666666667 | #DIV/0! |
| C101926 | 0.04761904762 | 0.04761904762 | 0.05555555556 |  | 0.7          | #DIV/0! |
| C101926 | 0.09523809524 | 0.09523809524 | 0.05555555556 |  | 1.473684211  | #DIV/0! |
| C101926 | 0.04761904762 | 0.04761904762 | 0.05555555556 |  | 0.7          | #DIV/0! |
| C101926 | 0.04761904762 | 0.04761904762 | 0.05555555556 |  | 0.7          | #DIV/0! |
| C101926 | 0.04761904762 | 0.04761904762 | 0.1666666667  |  | 0.2          | #DIV/0! |
| C101926 | 0.04761904762 | 0.04761904762 | 0.1111111111  |  | 0.325        | #DIV/0! |
| C101926 | 0.09523809524 | 0.09523809524 | 0.05555555556 |  | 1.473684211  | #DIV/0! |
| C101927 | 0.04761904762 | 0.04761904762 | 0.1666666667  |  | 0.2          | #DIV/0! |
| C101927 | 0.04761904762 | 0.04761904762 | 0.05555555556 |  | 0.7          | #DIV/0! |
| C101927 | 0.04761904762 | 0.04761904762 | 0             |  | inf          | #DIV/0! |
| C101927 | 0.04761904762 | 0.04761904762 | 0.1666666667  |  | 0.2          | #DIV/0! |
| C101927 | 0.04761904762 | 0.04761904762 | 0             |  | inf          | #DIV/0! |
| C101927 | 0.1428571429  | 0.1428571429  | 0.1111111111  |  | 1.083333333  | #DIV/0! |
| C101927 | 0.04761904762 | 0.04761904762 | 0             |  | inf          | #DIV/0! |
| C101927 | 0.04761904762 | 0.04761904762 | 0.05555555556 |  | 0.7          | #DIV/0! |
| C101927 | 0             | 0             | 0.1111111111  |  | 0            | #DIV/0! |
| C101927 | 0             | 0             | 0.1111111111  |  | 0            | #DIV/0! |
| C101927 | 0             | 0             | 0.1111111111  |  | 0            | #DIV/0! |
| C101927 | 0.1904761905  | 0.1904761905  | 0.1666666667  |  | 0.9411764706 | #DIV/0! |
| C101927 | 0             | 0             | 0.05555555556 |  | 0            | #DIV/0! |
| C101927 | 0.04761904762 | 0.04761904762 | 0             |  | inf          | #DIV/0! |
| C101927 | 0.2380952381  | 0.2380952381  | 0.1111111111  |  | 2.03125      | #DIV/0! |
| C101927 | 0.04761904762 | 0.04761904762 | 0             |  | inf          | #DIV/0! |
| C101927 | 0.04761904762 | 0.04761904762 | 0             |  | inf          | #DIV/0! |
| C101927 | 0             | 0             | 0             |  |              | #DIV/0! |
| C101927 | 0.04761904762 | 0.04761904762 | 0             |  | inf          | #DIV/0! |
| C101927 | 0.04761904762 | 0.04761904762 | 0             |  | inf          | #DIV/0! |
| C101927 | 0.1428571429  | 0.1428571429  | 0.1111111111  |  | 1.083333333  | #DIV/0! |

|         |               |               |               |  |              |         |
|---------|---------------|---------------|---------------|--|--------------|---------|
| C101927 | 0.04761904762 | 0.04761904762 | 0.05555555556 |  | 0.7          | #DIV/0! |
| C101927 | 0.1428571429  | 0.1428571429  | 0.1111111111  |  | 1.083333333  | #DIV/0! |
| C101927 | 0             | 0             | 0.05555555556 |  | 0            | #DIV/0! |
| C101927 | 0.1428571429  | 0.1428571429  | 0.05555555556 |  | 2.333333333  | #DIV/0! |
| C101927 | 0.09523809524 | 0.09523809524 | 0.05555555556 |  | 1.473684211  | #DIV/0! |
| C101927 | 0.04761904762 | 0.04761904762 | 0.1111111111  |  | 0.325        | #DIV/0! |
| C101927 | 0.1428571429  | 0.1428571429  | 0.1111111111  |  | 1.083333333  | #DIV/0! |
| C101927 | 0.1428571429  | 0.1428571429  | 0.05555555556 |  | 2.333333333  | #DIV/0! |
| C101927 | 0.1428571429  | 0.1428571429  | 0             |  | inf          | #DIV/0! |
| C101927 | 0.09523809524 | 0.09523809524 | 0             |  | inf          | #DIV/0! |
| C101927 | 0.09523809524 | 0.09523809524 | 0             |  | inf          | #DIV/0! |
| C101927 | 0.04761904762 | 0.04761904762 | 0.1111111111  |  | 0.325        | #DIV/0! |
| C101927 | 0.09523809524 | 0.09523809524 | 0             |  | inf          | #DIV/0! |
| C101927 | 0.04761904762 | 0.04761904762 | 0             |  | inf          | #DIV/0! |
| C101927 | 0.04761904762 | 0.04761904762 | 0             |  | inf          | #DIV/0! |
| C101927 | 0.04761904762 | 0.04761904762 | 0.05555555556 |  | 0.7          | #DIV/0! |
| C101927 | 0.04761904762 | 0.04761904762 | 0.1111111111  |  | 0.325        | #DIV/0! |
| C101927 | 0.1904761905  | 0.1904761905  | 0.1111111111  |  | 1.529411765  | #DIV/0! |
| C101927 | 0.04761904762 | 0.04761904762 | 0.05555555556 |  | 0.7          | #DIV/0! |
| C101927 | 0.04761904762 | 0.04761904762 | 0.1111111111  |  | 0.325        | #DIV/0! |
| C101927 | 0.04761904762 | 0.04761904762 | 0             |  | inf          | #DIV/0! |
| C101927 | 0.1428571429  | 0.1428571429  | 0             |  | inf          | #DIV/0! |
| C101927 | 0.04761904762 | 0.04761904762 | 0             |  | inf          | #DIV/0! |
| C101927 | 0.04761904762 | 0.04761904762 | 0.05555555556 |  | 0.7          | #DIV/0! |
| C101927 | 0.04761904762 | 0.04761904762 | 0.05555555556 |  | 0.7          | #DIV/0! |
| C101927 | 0.09523809524 | 0.09523809524 | 0             |  | inf          | #DIV/0! |
| C101927 | 0.04761904762 | 0.04761904762 | 0.05555555556 |  | 0.7          | #DIV/0! |
| C101927 | 0.04761904762 | 0.04761904762 | 0.1666666667  |  | 0.2          | #DIV/0! |
| C101927 | 0.04761904762 | 0.04761904762 | 0.1666666667  |  | 0.2          | #DIV/0! |
| C101927 | 0.04761904762 | 0.04761904762 | 0             |  | inf          | #DIV/0! |
| C101927 | 0             | 0             | 0.05555555556 |  | 0            | #DIV/0! |
| C101927 | 0             | 0             | 0.05555555556 |  | 0            | #DIV/0! |
| C101927 | 0.04761904762 | 0.04761904762 | 0             |  | inf          | #DIV/0! |
| C101927 | 0.1428571429  | 0.1428571429  | 0.1666666667  |  | 0.6666666667 | #DIV/0! |
| C101927 | 0.04761904762 | 0.04761904762 | 0.1111111111  |  | 0.325        | #DIV/0! |
| C101927 | 0.04761904762 | 0.04761904762 | 0.1666666667  |  | 0.2          | #DIV/0! |
| C101927 | 0.04761904762 | 0.04761904762 | 0             |  | inf          | #DIV/0! |
| C101927 | 0             | 0             | 0.05555555556 |  | 0            | #DIV/0! |
| C101927 | 0.09523809524 | 0.09523809524 | 0             |  | inf          | #DIV/0! |
| C101927 | 0.04761904762 | 0.04761904762 | 0.1111111111  |  | 0.325        | #DIV/0! |
| C101927 | 0.04761904762 | 0.04761904762 | 0.1111111111  |  | 0.325        | #DIV/0! |
| C101927 | 0.04761904762 | 0.04761904762 | 0             |  | inf          | #DIV/0! |
| C101927 | 0.09523809524 | 0.09523809524 | 0.05555555556 |  | 1.473684211  | #DIV/0! |
| C101927 | 0.04761904762 | 0.04761904762 | 0             |  | inf          | #DIV/0! |
| C101927 | 0.1428571429  | 0.1428571429  | 0.05555555556 |  | 2.333333333  | #DIV/0! |
| C101927 | 0.04761904762 | 0.04761904762 | 0.05555555556 |  | 0.7          | #DIV/0! |
| C101927 | 0.09523809524 | 0.09523809524 | 0.1111111111  |  | 0.6842105263 | #DIV/0! |
| C101927 | 0             | 0             | 0.1666666667  |  | 0            | #DIV/0! |
| C101927 | 0             | 0             | 0.05555555556 |  | 0            | #DIV/0! |
| C101927 | 0.1428571429  | 0.1428571429  | 0.05555555556 |  | 2.333333333  | #DIV/0! |
| C101927 | 0.1428571429  | 0.1428571429  | 0             |  | inf          | #DIV/0! |

|         |               |               |               |  |              |         |
|---------|---------------|---------------|---------------|--|--------------|---------|
| C101927 | 0.04761904762 | 0.04761904762 | 0             |  | inf          | #DIV/0! |
| C101927 | 0.04761904762 | 0.04761904762 | 0             |  | inf          | #DIV/0! |
| C101927 | 0.04761904762 | 0.04761904762 | 0.1111111111  |  | 0.325        | #DIV/0! |
| C101927 | 0             | 0             | 0.05555555556 |  | 0            | #DIV/0! |
| C101927 | 0.09523809524 | 0.09523809524 | 0.1666666667  |  | 0.4210526316 | #DIV/0! |
| C101927 | 0             | 0             | 0.05555555556 |  | 0            | #DIV/0! |
| C101927 | 0.09523809524 | 0.09523809524 | 0             |  | inf          | #DIV/0! |
| C101927 | 0.09523809524 | 0.09523809524 | 0.1111111111  |  | 0.6842105263 | #DIV/0! |
| C101927 | 0.04761904762 | 0.04761904762 | 0.05555555556 |  | 0.7          | #DIV/0! |
| C101927 | 0             | 0             | 0.1666666667  |  | 0            | #DIV/0! |
| C101927 | 0.09523809524 | 0.09523809524 | 0             |  | inf          | #DIV/0! |
| C101927 | 0.04761904762 | 0.04761904762 | 0.05555555556 |  | 0.7          | #DIV/0! |
| C101927 | 0.04761904762 | 0.04761904762 | 0.05555555556 |  | 0.7          | #DIV/0! |
| C101927 | 0.04761904762 | 0.04761904762 | 0.05555555556 |  | 0.7          | #DIV/0! |
| C101927 | 0             | 0             | 0.05555555556 |  | 0            | #DIV/0! |
| C101927 | 0.1428571429  | 0.1428571429  | 0.05555555556 |  | 2.333333333  | #DIV/0! |
| C101927 | 0.1428571429  | 0.1428571429  | 0.1111111111  |  | 1.083333333  | #DIV/0! |
| C101927 | 0             | 0             | 0.05555555556 |  | 0            | #DIV/0! |
| C101927 | 0.1428571429  | 0.1428571429  | 0             |  | inf          | #DIV/0! |
| C101927 | 0.04761904762 | 0.04761904762 | 0             |  | inf          | #DIV/0! |
| C101927 | 0             | 0             | 0.05555555556 |  | 0            | #DIV/0! |
| C101927 | 0.04761904762 | 0.04761904762 | 0.2222222222  |  | 0.1375       | #DIV/0! |
| C101927 | 0             | 0             | 0.05555555556 |  | 0            | #DIV/0! |
| C101927 | 0.1428571429  | 0.1428571429  | 0.1111111111  |  | 1.083333333  | #DIV/0! |
| C101927 | 0             | 0             | 0.05555555556 |  | 0            | #DIV/0! |
| C101927 | 0.09523809524 | 0.09523809524 | 0             |  | inf          | #DIV/0! |
| C101927 | 0.04761904762 | 0.04761904762 | 0.2222222222  |  | 0.1375       | #DIV/0! |
| C101927 | 0.04761904762 | 0.04761904762 | 0             |  | inf          | #DIV/0! |
| C101927 | 0.1904761905  | 0.1904761905  | 0.05555555556 |  | 3.294117647  | #DIV/0! |
| C101927 | 0.1428571429  | 0.1428571429  | 0.05555555556 |  | 2.333333333  | #DIV/0! |
| C101927 | 0.04761904762 | 0.04761904762 | 0             |  | inf          | #DIV/0! |
| C101927 | 0             | 0             | 0.05555555556 |  | 0            | #DIV/0! |
| C101927 | 0             | 0             | 0.1111111111  |  | 0            | #DIV/0! |
| C101927 | 0.04761904762 | 0.04761904762 | 0.05555555556 |  | 0.7          | #DIV/0! |
| C101927 | 0.04761904762 | 0.04761904762 | 0.05555555556 |  | 0.7          | #DIV/0! |
| C101927 | 0.1428571429  | 0.1428571429  | 0.1111111111  |  | 1.083333333  | #DIV/0! |
| C101927 | 0.04761904762 | 0.04761904762 | 0.1111111111  |  | 0.325        | #DIV/0! |
| C101927 | 0.04761904762 | 0.04761904762 | 0.2222222222  |  | 0.1375       | #DIV/0! |
| C101927 | 0.09523809524 | 0.09523809524 | 0.1111111111  |  | 0.6842105263 | #DIV/0! |
| C101927 | 0.09523809524 | 0.09523809524 | 0.05555555556 |  | 1.473684211  | #DIV/0! |
| C101927 | 0.1904761905  | 0.1904761905  | 0             |  | inf          | #DIV/0! |
| C101927 | 0             | 0             | 0.05555555556 |  | 0            | #DIV/0! |
| C101927 | 0.04761904762 | 0.04761904762 | 0.2222222222  |  | 0.1375       | #DIV/0! |
| C101927 | 0.04761904762 | 0.04761904762 | 0             |  | inf          | #DIV/0! |
| C101927 | 0.04761904762 | 0.04761904762 | 0.2222222222  |  | 0.1375       | #DIV/0! |
| C101927 | 0.04761904762 | 0.04761904762 | 0             |  | inf          | #DIV/0! |
| C101927 | 0.1428571429  | 0.1428571429  | 0.1111111111  |  | 1.083333333  | #DIV/0! |
| C101927 | 0.09523809524 | 0.09523809524 | 0             |  | inf          | #DIV/0! |
| C101927 | 0.04761904762 | 0.04761904762 | 0.2222222222  |  | 0.1375       | #DIV/0! |
| C101927 | 0.04761904762 | 0.04761904762 | 0.1666666667  |  | 0.2          | #DIV/0! |
| C101927 | 0.09523809524 | 0.09523809524 | 0.05555555556 |  | 1.473684211  | #DIV/0! |

|         |               |               |               |  |              |         |
|---------|---------------|---------------|---------------|--|--------------|---------|
| C101927 | 0.04761904762 | 0.04761904762 | 0             |  | inf          | #DIV/0! |
| C101927 | 0             | 0             | 0.1111111111  |  | 0            | #DIV/0! |
| C101927 | 0.04761904762 | 0.04761904762 | 0.05555555556 |  | 0.7          | #DIV/0! |
| C101927 | 0.04761904762 | 0.04761904762 | 0.2222222222  |  | 0.1375       | #DIV/0! |
| C101927 | 0.09523809524 | 0.09523809524 | 0.05555555556 |  | 1.473684211  | #DIV/0! |
| C101927 | 0.09523809524 | 0.09523809524 | 0.05555555556 |  | 1.473684211  | #DIV/0! |
| C101927 | 0.04761904762 | 0.04761904762 | 0             |  | inf          | #DIV/0! |
| C101927 | 0.09523809524 | 0.09523809524 | 0             |  | inf          | #DIV/0! |
| C101927 | 0.04761904762 | 0.04761904762 | 0.05555555556 |  | 0.7          | #DIV/0! |
| C101927 | 0.04761904762 | 0.04761904762 | 0             |  | inf          | #DIV/0! |
| C101927 | 0             | 0             | 0.05555555556 |  | 0            | #DIV/0! |
| C101927 | 0             | 0             | 0.05555555556 |  | 0            | #DIV/0! |
| C101927 | 0             | 0             | 0.05555555556 |  | 0            | #DIV/0! |
| C101927 | 0             | 0             | 0.05555555556 |  | 0            | #DIV/0! |
| C101927 | 0             | 0             | 0.1111111111  |  | 0            | #DIV/0! |
| C101927 | 0.1428571429  | 0.1428571429  | 0.05555555556 |  | 2.333333333  | #DIV/0! |
| C101927 | 0.04761904762 | 0.04761904762 | 0.1111111111  |  | 0.325        | #DIV/0! |
| C101927 | 0.1428571429  | 0.1428571429  | 0.2222222222  |  | 0.4583333333 | #DIV/0! |
| C101927 | 0             | 0             | 0.05555555556 |  | 0            | #DIV/0! |
| C101927 | 0.04761904762 | 0.04761904762 | 0.05555555556 |  | 0.7          | #DIV/0! |
| C101927 | 0             | 0             | 0.05555555556 |  | 0            | #DIV/0! |
| C101927 | 0.04761904762 | 0.04761904762 | 0.1666666667  |  | 0.2          | #DIV/0! |
| C101927 | 0             | 0             | 0.05555555556 |  | 0            | #DIV/0! |
| C101927 | 0             | 0             | 0.05555555556 |  | 0            | #DIV/0! |
| C101927 | 0.04761904762 | 0.04761904762 | 0.05555555556 |  | 0.7          | #DIV/0! |
| C101927 | 0             | 0             | 0.05555555556 |  | 0            | #DIV/0! |
| C101927 | 0.09523809524 | 0.09523809524 | 0.05555555556 |  | 1.473684211  | #DIV/0! |
| C101928 | 0             | 0             | 0.1111111111  |  | 0            | #DIV/0! |
| C101928 | 0.09523809524 | 0.09523809524 | 0.1111111111  |  | 0.6842105263 | #DIV/0! |
| C101928 | 0.04761904762 | 0.04761904762 | 0.05555555556 |  | 0.7          | #DIV/0! |
| C101928 | 0.1904761905  | 0.1904761905  | 0             |  | inf          | #DIV/0! |
| C101928 | 0.04761904762 | 0.04761904762 | 0.05555555556 |  | 0.7          | #DIV/0! |
| C101928 | 0             | 0             | 0.05555555556 |  | 0            | #DIV/0! |
| C101928 | 0             | 0             | 0             |  |              | #DIV/0! |
| C101928 | 0.04761904762 | 0.04761904762 | 0.1111111111  |  | 0.325        | #DIV/0! |
| C101928 | 0.1904761905  | 0.1904761905  | 0.05555555556 |  | 3.294117647  | #DIV/0! |
| C101928 | 0.04761904762 | 0.04761904762 | 0             |  | inf          | #DIV/0! |
| C101928 | 0.1428571429  | 0.1428571429  | 0.1111111111  |  | 1.083333333  | #DIV/0! |
| C101928 | 0             | 0             | 0.05555555556 |  | 0            | #DIV/0! |
| C101928 | 0.1428571429  | 0.1428571429  | 0.1111111111  |  | 1.083333333  | #DIV/0! |
| C101928 | 0.09523809524 | 0.09523809524 | 0.05555555556 |  | 1.473684211  | #DIV/0! |
| C101928 | 0.1428571429  | 0.1428571429  | 0.05555555556 |  | 2.333333333  | #DIV/0! |
| C101928 | 0.04761904762 | 0.04761904762 | 0.1666666667  |  | 0.2          | #DIV/0! |
| C101928 | 0             | 0             | 0.05555555556 |  | 0            | #DIV/0! |
| C101928 | 0.04761904762 | 0.04761904762 | 0.05555555556 |  | 0.7          | #DIV/0! |
| C101928 | 0.04761904762 | 0.04761904762 | 0.1111111111  |  | 0.325        | #DIV/0! |
| C101928 | 0.1904761905  | 0.1904761905  | 0.1111111111  |  | 1.529411765  | #DIV/0! |
| C101928 | 0.04761904762 | 0.04761904762 | 0.1111111111  |  | 0.325        | #DIV/0! |
| C101928 | 0.04761904762 | 0.04761904762 | 0.05555555556 |  | 0.7          | #DIV/0! |
| C101928 | 0.04761904762 | 0.04761904762 | 0.05555555556 |  | 0.7          | #DIV/0! |
| C101928 | 0.1904761905  | 0.1904761905  | 0.1111111111  |  | 1.529411765  | #DIV/0! |

|         |               |               |              |  |              |         |
|---------|---------------|---------------|--------------|--|--------------|---------|
| C101928 | 0.09523809524 | 0.09523809524 | 0            |  | inf          | #DIV/0! |
| C101928 | 0.04761904762 | 0.04761904762 | 0.1111111111 |  | 0.325        | #DIV/0! |
| C101928 | 0             | 0             | 0.1111111111 |  | 0            | #DIV/0! |
| C101928 | 0.04761904762 | 0.04761904762 | 0            |  | inf          | #DIV/0! |
| C101928 | 0.09523809524 | 0.09523809524 | 0            |  | inf          | #DIV/0! |
| C101928 | 0.04761904762 | 0.04761904762 | 0.1666666667 |  | 0.2          | #DIV/0! |
| C101928 | 0.04761904762 | 0.04761904762 | 0.1111111111 |  | 0.325        | #DIV/0! |
| C101928 | 0.1904761905  | 0.1904761905  | 0.1111111111 |  | 1.529411765  | #DIV/0! |
| C101928 | 0.04761904762 | 0.04761904762 | 0.2222222222 |  | 0.1375       | #DIV/0! |
| C101928 | 0.1428571429  | 0.1428571429  | 0.1111111111 |  | 1.083333333  | #DIV/0! |
| C101928 | 0.04761904762 | 0.04761904762 | 0            |  | inf          | #DIV/0! |
| C101928 | 0.1904761905  | 0.1904761905  | 0.2222222222 |  | 0.6470588235 | #DIV/0! |
| C101928 | 0.04761904762 | 0.04761904762 | 0.0555555556 |  | 0.7          | #DIV/0! |
| C101928 | 0             | 0             | 0.0555555556 |  | 0            | #DIV/0! |
| C101928 | 0.1428571429  | 0.1428571429  | 0            |  | inf          | #DIV/0! |
| C101928 | 0.04761904762 | 0.04761904762 | 0            |  | inf          | #DIV/0! |
| C101928 | 0.04761904762 | 0.04761904762 | 0            |  | inf          | #DIV/0! |
| C101928 | 0.04761904762 | 0.04761904762 | 0.0555555556 |  | 0.7          | #DIV/0! |
| C101928 | 0.04761904762 | 0.04761904762 | 0.0555555556 |  | 0.7          | #DIV/0! |
| C101928 | 0.04761904762 | 0.04761904762 | 0.1666666667 |  | 0.2          | #DIV/0! |
| C101928 | 0.09523809524 | 0.09523809524 | 0.1111111111 |  | 0.6842105263 | #DIV/0! |
| C101928 | 0             | 0             | 0.0555555556 |  | 0            | #DIV/0! |
| C101928 | 0.04761904762 | 0.04761904762 | 0.0555555556 |  | 0.7          | #DIV/0! |
| C101928 | 0.09523809524 | 0.09523809524 | 0.1111111111 |  | 0.6842105263 | #DIV/0! |
| C101928 | 0.04761904762 | 0.04761904762 | 0.1111111111 |  | 0.325        | #DIV/0! |
| C101928 | 0.04761904762 | 0.04761904762 | 0            |  | inf          | #DIV/0! |
| C101928 | 0.04761904762 | 0.04761904762 | 0.1111111111 |  | 0.325        | #DIV/0! |
| C101928 | 0.04761904762 | 0.04761904762 | 0.0555555556 |  | 0.7          | #DIV/0! |
| C101928 | 0.04761904762 | 0.04761904762 | 0            |  | inf          | #DIV/0! |
| C101928 | 0.04761904762 | 0.04761904762 | 0.0555555556 |  | 0.7          | #DIV/0! |
| C101928 | 0             | 0             | 0.0555555556 |  | 0            | #DIV/0! |
| C101928 | 0.1428571429  | 0.1428571429  | 0            |  | inf          | #DIV/0! |
| C101928 | 0.1904761905  | 0.1904761905  | 0.2222222222 |  | 0.6470588235 | #DIV/0! |
| C101928 | 0             | 0             | 0.0555555556 |  | 0            | #DIV/0! |
| C101928 | 0.04761904762 | 0.04761904762 | 0.1111111111 |  | 0.325        | #DIV/0! |
| C101928 | 0.1428571429  | 0.1428571429  | 0.1666666667 |  | 0.6666666667 | #DIV/0! |
| C101928 | 0.1428571429  | 0.1428571429  | 0            |  | inf          | #DIV/0! |
| C101928 | 0.04761904762 | 0.04761904762 | 0            |  | inf          | #DIV/0! |
| C101928 | 0.09523809524 | 0.09523809524 | 0.0555555556 |  | 1.473684211  | #DIV/0! |
| C101928 | 0.04761904762 | 0.04761904762 | 0            |  | inf          | #DIV/0! |
| C101928 | 0.04761904762 | 0.04761904762 | 0.0555555556 |  | 0.7          | #DIV/0! |
| C101928 | 0             | 0             | 0            |  |              | #DIV/0! |
| C101928 | 0.04761904762 | 0.04761904762 | 0.0555555556 |  | 0.7          | #DIV/0! |
| C101928 | 0.04761904762 | 0.04761904762 | 0            |  | inf          | #DIV/0! |
| C101928 | 0.04761904762 | 0.04761904762 | 0.0555555556 |  | 0.7          | #DIV/0! |
| C101928 | 0.09523809524 | 0.09523809524 | 0.0555555556 |  | 1.473684211  | #DIV/0! |
| C101928 | 0.04761904762 | 0.04761904762 | 0            |  | inf          | #DIV/0! |
| C101928 | 0.09523809524 | 0.09523809524 | 0.1111111111 |  | 0.6842105263 | #DIV/0! |
| C101928 | 0.04761904762 | 0.04761904762 | 0.0555555556 |  | 0.7          | #DIV/0! |
| C101928 | 0.04761904762 | 0.04761904762 | 0            |  | inf          | #DIV/0! |
| C101928 | 0.04761904762 | 0.04761904762 | 0            |  | inf          | #DIV/0! |



|         |               |               |               |  |              |         |
|---------|---------------|---------------|---------------|--|--------------|---------|
| C101928 | 0.04761904762 | 0.04761904762 | 0             |  | inf          | #DIV/0! |
| C101928 | 0.04761904762 | 0.04761904762 | 0             |  | inf          | #DIV/0! |
| C101928 | 0.04761904762 | 0.04761904762 | 0             |  | inf          | #DIV/0! |
| C101928 | 0.09523809524 | 0.09523809524 | 0.05555555556 |  | 1.473684211  | #DIV/0! |
| C101928 | 0.04761904762 | 0.04761904762 | 0             |  | inf          | #DIV/0! |
| C101928 | 0.1428571429  | 0.1428571429  | 0             |  | inf          | #DIV/0! |
| C101928 | 0             | 0             | 0.05555555556 |  | 0            | #DIV/0! |
| C101928 | 0.04761904762 | 0.04761904762 | 0             |  | inf          | #DIV/0! |
| C101928 | 0.1428571429  | 0.1428571429  | 0             |  | inf          | #DIV/0! |
| C101928 | 0.09523809524 | 0.09523809524 | 0.05555555556 |  | 1.473684211  | #DIV/0! |
| C101928 | 0.09523809524 | 0.09523809524 | 0.05555555556 |  | 1.473684211  | #DIV/0! |
| C101928 | 0.04761904762 | 0.04761904762 | 0.05555555556 |  | 0.7          | #DIV/0! |
| C101928 | 0.04761904762 | 0.04761904762 | 0.2222222222  |  | 0.1375       | #DIV/0! |
| C101928 | 0.04761904762 | 0.04761904762 | 0.1666666667  |  | 0.2          | #DIV/0! |
| C101928 | 0.04761904762 | 0.04761904762 | 0             |  | inf          | #DIV/0! |
| C101928 | 0.04761904762 | 0.04761904762 | 0             |  | inf          | #DIV/0! |
| C101928 | 0             | 0             | 0.05555555556 |  | 0            | #DIV/0! |
| C101928 | 0.1428571429  | 0.1428571429  | 0             |  | inf          | #DIV/0! |
| C101928 | 0.04761904762 | 0.04761904762 | 0             |  | inf          | #DIV/0! |
| C101928 | 0.04761904762 | 0.04761904762 | 0             |  | inf          | #DIV/0! |
| C101928 | 0.1428571429  | 0.1428571429  | 0             |  | inf          | #DIV/0! |
| C101928 | 0.04761904762 | 0.04761904762 | 0             |  | inf          | #DIV/0! |
| C101928 | 0.09523809524 | 0.09523809524 | 0.05555555556 |  | 1.473684211  | #DIV/0! |
| C101928 | 0.04761904762 | 0.04761904762 | 0             |  | inf          | #DIV/0! |
| C101928 | 0.04761904762 | 0.04761904762 | 0             |  | inf          | #DIV/0! |
| C101928 | 0.04761904762 | 0.04761904762 | 0.05555555556 |  | 0.7          | #DIV/0! |
| C101928 | 0.04761904762 | 0.04761904762 | 0.1111111111  |  | 0.325        | #DIV/0! |
| C101928 | 0.04761904762 | 0.04761904762 | 0.05555555556 |  | 0.7          | #DIV/0! |
| C101928 | 0.04761904762 | 0.04761904762 | 0             |  | inf          | #DIV/0! |
| C101928 | 0.1904761905  | 0.1904761905  | 0.05555555556 |  | 3.294117647  | #DIV/0! |
| C101928 | 0.04761904762 | 0.04761904762 | 0.05555555556 |  | 0.7          | #DIV/0! |
| C101928 | 0.04761904762 | 0.04761904762 | 0.05555555556 |  | 0.7          | #DIV/0! |
| C101928 | 0.04761904762 | 0.04761904762 | 0.05555555556 |  | 0.7          | #DIV/0! |
| C101928 | 0.09523809524 | 0.09523809524 | 0             |  | inf          | #DIV/0! |
| C101928 | 0.04761904762 | 0.04761904762 | 0.1111111111  |  | 0.325        | #DIV/0! |
| C101928 | 0.04761904762 | 0.04761904762 | 0             |  | inf          | #DIV/0! |
| C101928 | 0.09523809524 | 0.09523809524 | 0.05555555556 |  | 1.473684211  | #DIV/0! |
| C101928 | 0.04761904762 | 0.04761904762 | 0.05555555556 |  | 0.7          | #DIV/0! |
| C101928 | 0.04761904762 | 0.04761904762 | 0.05555555556 |  | 0.7          | #DIV/0! |
| C101928 | 0.09523809524 | 0.09523809524 | 0.1111111111  |  | 0.6842105263 | #DIV/0! |
| C101928 | 0.1428571429  | 0.1428571429  | 0.05555555556 |  | 2.333333333  | #DIV/0! |
| C101928 | 0.04761904762 | 0.04761904762 | 0             |  | inf          | #DIV/0! |
| C101928 | 0.04761904762 | 0.04761904762 | 0             |  | inf          | #DIV/0! |
| C101928 | 0.04761904762 | 0.04761904762 | 0.05555555556 |  | 0.7          | #DIV/0! |
| C101928 | 0             | 0             | 0.05555555556 |  | 0            | #DIV/0! |
| C101928 | 0.1904761905  | 0.1904761905  | 0.05555555556 |  | 3.294117647  | #DIV/0! |
| C101928 | 0             | 0             | 0.05555555556 |  | 0            | #DIV/0! |
| C101928 | 0.04761904762 | 0.04761904762 | 0.1666666667  |  | 0.2          | #DIV/0! |
| C101928 | 0.04761904762 | 0.04761904762 | 0.05555555556 |  | 0.7          | #DIV/0! |
| C101928 | 0.04761904762 | 0.04761904762 | 0.05555555556 |  | 0.7          | #DIV/0! |
| C101928 | 0.09523809524 | 0.09523809524 | 0             |  | inf          | #DIV/0! |

|         |               |               |               |  |              |         |
|---------|---------------|---------------|---------------|--|--------------|---------|
| C101928 | 0.04761904762 | 0.04761904762 | 0.05555555556 |  | 0.7          | #DIV/0! |
| C101928 | 0             | 0             | 0.05555555556 |  | 0            | #DIV/0! |
| C101928 | 0             | 0             | 0.05555555556 |  | 0            | #DIV/0! |
| C101928 | 0.1428571429  | 0.1428571429  | 0             |  | inf          | #DIV/0! |
| C101928 | 0.04761904762 | 0.04761904762 | 0.05555555556 |  | 0.7          | #DIV/0! |
| C101928 | 0             | 0             | 0.05555555556 |  | 0            | #DIV/0! |
| C101928 | 0.04761904762 | 0.04761904762 | 0.05555555556 |  | 0.7          | #DIV/0! |
| C101928 | 0.1904761905  | 0.1904761905  | 0             |  | inf          | #DIV/0! |
| C101929 | 0             | 0             | 0             |  |              | #DIV/0! |
| C101929 | 0.04761904762 | 0.04761904762 | 0.05555555556 |  | 0.7          | #DIV/0! |
| C101929 | 0             | 0             | 0.05555555556 |  | 0            | #DIV/0! |
| C101929 | 0.09523809524 | 0.09523809524 | 0.1111111111  |  | 0.6842105263 | #DIV/0! |
| C101929 | 0.09523809524 | 0.09523809524 | 0.1111111111  |  | 0.6842105263 | #DIV/0! |
| C101929 | 0.04761904762 | 0.04761904762 | 0.05555555556 |  | 0.7          | #DIV/0! |
| C101929 | 0             | 0             | 0             |  |              | #DIV/0! |
| C101929 | 0.04761904762 | 0.04761904762 | 0.05555555556 |  | 0.7          | #DIV/0! |
| C101929 | 0.09523809524 | 0.09523809524 | 0.05555555556 |  | 1.473684211  | #DIV/0! |
| C101929 | 0.04761904762 | 0.04761904762 | 0             |  | inf          | #DIV/0! |
| C101929 | 0.09523809524 | 0.09523809524 | 0.05555555556 |  | 1.473684211  | #DIV/0! |
| C101929 | 0.09523809524 | 0.09523809524 | 0.1111111111  |  | 0.6842105263 | #DIV/0! |
| C101929 | 0.09523809524 | 0.09523809524 | 0             |  | inf          | #DIV/0! |
| C101929 | 0.09523809524 | 0.09523809524 | 0.1111111111  |  | 0.6842105263 | #DIV/0! |
| C101929 | 0.09523809524 | 0.09523809524 | 0.05555555556 |  | 1.473684211  | #DIV/0! |
| C101929 | 0.04761904762 | 0.04761904762 | 0             |  | inf          | #DIV/0! |
| C101929 | 0.04761904762 | 0.04761904762 | 0.05555555556 |  | 0.7          | #DIV/0! |
| C101929 | 0.1904761905  | 0.1904761905  | 0.05555555556 |  | 3.294117647  | #DIV/0! |
| C101929 | 0.09523809524 | 0.09523809524 | 0.1111111111  |  | 0.6842105263 | #DIV/0! |
| C101929 | 0.04761904762 | 0.04761904762 | 0             |  | inf          | #DIV/0! |
| C101929 | 0             | 0             | 0.05555555556 |  | 0            | #DIV/0! |
| C101929 | 0.09523809524 | 0.09523809524 | 0.1666666667  |  | 0.4210526316 | #DIV/0! |
| C101929 | 0.1428571429  | 0.1428571429  | 0             |  | inf          | #DIV/0! |
| C101929 | 0.09523809524 | 0.09523809524 | 0.1111111111  |  | 0.6842105263 | #DIV/0! |
| C101929 | 0             | 0             | 0.05555555556 |  | 0            | #DIV/0! |
| C101929 | 0.1428571429  | 0.1428571429  | 0.05555555556 |  | 2.333333333  | #DIV/0! |
| C101929 | 0.04761904762 | 0.04761904762 | 0.1111111111  |  | 0.325        | #DIV/0! |
| C101929 | 0.04761904762 | 0.04761904762 | 0             |  | inf          | #DIV/0! |
| C101929 | 0.09523809524 | 0.09523809524 | 0.1666666667  |  | 0.4210526316 | #DIV/0! |
| C101929 | 0.09523809524 | 0.09523809524 | 0.1111111111  |  | 0.6842105263 | #DIV/0! |
| C101929 | 0.09523809524 | 0.09523809524 | 0.2222222222  |  | 0.2894736842 | #DIV/0! |
| C101929 | 0.04761904762 | 0.04761904762 | 0.1111111111  |  | 0.325        | #DIV/0! |
| C101929 | 0.04761904762 | 0.04761904762 | 0.1111111111  |  | 0.325        | #DIV/0! |
| C101929 | 0             | 0             | 0.05555555556 |  | 0            | #DIV/0! |
| C101929 | 0.04761904762 | 0.04761904762 | 0.1111111111  |  | 0.325        | #DIV/0! |
| C101929 | 0.09523809524 | 0.09523809524 | 0.05555555556 |  | 1.473684211  | #DIV/0! |
| C101929 | 0.09523809524 | 0.09523809524 | 0.1111111111  |  | 0.6842105263 | #DIV/0! |
| C101929 | 0             | 0             | 0.05555555556 |  | 0            | #DIV/0! |
| C101929 | 0.04761904762 | 0.04761904762 | 0             |  | inf          | #DIV/0! |
| C101929 | 0.04761904762 | 0.04761904762 | 0             |  | inf          | #DIV/0! |
| C101929 | 0.04761904762 | 0.04761904762 | 0.1111111111  |  | 0.325        | #DIV/0! |
| C101929 | 0.09523809524 | 0.09523809524 | 0.05555555556 |  | 1.473684211  | #DIV/0! |
| C101929 | 0.1904761905  | 0.1904761905  | 0.1666666667  |  | 0.9411764706 | #DIV/0! |

|         |               |               |               |  |              |         |
|---------|---------------|---------------|---------------|--|--------------|---------|
| C101929 | 0.1428571429  | 0.1428571429  | 0.1111111111  |  | 1.083333333  | #DIV/0! |
| C101929 | 0.09523809524 | 0.09523809524 | 0.2222222222  |  | 0.2894736842 | #DIV/0! |
| C101929 | 0.04761904762 | 0.04761904762 | 0.05555555556 |  | 0.7          | #DIV/0! |
| C101929 | 0             | 0             | 0.05555555556 |  | 0            | #DIV/0! |
| C101929 | 0.04761904762 | 0.04761904762 | 0.05555555556 |  | 0.7          | #DIV/0! |
| C101929 | 0.04761904762 | 0.04761904762 | 0.05555555556 |  | 0.7          | #DIV/0! |
| C101929 | 0.04761904762 | 0.04761904762 | 0.1111111111  |  | 0.325        | #DIV/0! |
| C101929 | 0.04761904762 | 0.04761904762 | 0.05555555556 |  | 0.7          | #DIV/0! |
| C101929 | 0.1428571429  | 0.1428571429  | 0.1111111111  |  | 1.083333333  | #DIV/0! |
| C101929 | 0             | 0             | 0.05555555556 |  | 0            | #DIV/0! |
| C101929 | 0.04761904762 | 0.04761904762 | 0.05555555556 |  | 0.7          | #DIV/0! |
| C101929 | 0.1904761905  | 0.1904761905  | 0.05555555556 |  | 3.294117647  | #DIV/0! |
| C101929 | 0.1428571429  | 0.1428571429  | 0.1666666667  |  | 0.6666666667 | #DIV/0! |
| C101929 | 0             | 0             | 0.05555555556 |  | 0            | #DIV/0! |
| C101929 | 0             | 0             | 0.05555555556 |  | 0            | #DIV/0! |
| C101929 | 0.04761904762 | 0.04761904762 | 0.05555555556 |  | 0.7          | #DIV/0! |
| C101929 | 0.04761904762 | 0.04761904762 | 0.1111111111  |  | 0.325        | #DIV/0! |
| C101929 | 0             | 0             | 0.05555555556 |  | 0            | #DIV/0! |
| C101929 | 0             | 0             | 0             |  |              | #DIV/0! |
| C101929 | 0             | 0             | 0.05555555556 |  | 0            | #DIV/0! |
| C101929 | 0.09523809524 | 0.09523809524 | 0.05555555556 |  | 1.473684211  | #DIV/0! |
| C101929 | 0             | 0             | 0.05555555556 |  | 0            | #DIV/0! |
| C101929 | 0.1428571429  | 0.1428571429  | 0.1111111111  |  | 1.083333333  | #DIV/0! |
| C101929 | 0.1428571429  | 0.1428571429  | 0             |  | inf          | #DIV/0! |
| C101929 | 0             | 0             | 0.05555555556 |  | 0            | #DIV/0! |
| C101929 | 0.09523809524 | 0.09523809524 | 0.05555555556 |  | 1.473684211  | #DIV/0! |
| C101929 | 0.1904761905  | 0.1904761905  | 0.2222222222  |  | 0.6470588235 | #DIV/0! |
| C101929 | 0.04761904762 | 0.04761904762 | 0.05555555556 |  | 0.7          | #DIV/0! |
| C101929 | 0.04761904762 | 0.04761904762 | 0.05555555556 |  | 0.7          | #DIV/0! |
| C101929 | 0             | 0             | 0.05555555556 |  | 0            | #DIV/0! |
| C101929 | 0.09523809524 | 0.09523809524 | 0.1666666667  |  | 0.4210526316 | #DIV/0! |
| C101929 | 0.04761904762 | 0.04761904762 | 0.1111111111  |  | 0.325        | #DIV/0! |
| C101929 | 0             | 0             | 0.05555555556 |  | 0            | #DIV/0! |
| C101929 | 0.04761904762 | 0.04761904762 | 0.1111111111  |  | 0.325        | #DIV/0! |
| C101929 | 0.04761904762 | 0.04761904762 | 0.05555555556 |  | 0.7          | #DIV/0! |
| C101929 | 0             | 0             | 0.05555555556 |  | 0            | #DIV/0! |
| C101929 | 0.04761904762 | 0.04761904762 | 0.05555555556 |  | 0.7          | #DIV/0! |
| C101929 | 0.1428571429  | 0.1428571429  | 0             |  | inf          | #DIV/0! |
| C101929 | 0.09523809524 | 0.09523809524 | 0.05555555556 |  | 1.473684211  | #DIV/0! |
| C101929 | 0.09523809524 | 0.09523809524 | 0.1111111111  |  | 0.6842105263 | #DIV/0! |
| C101929 | 0.04761904762 | 0.04761904762 | 0.05555555556 |  | 0.7          | #DIV/0! |
| C101929 | 0.1904761905  | 0.1904761905  | 0.1111111111  |  | 1.529411765  | #DIV/0! |
| C101929 | 0.04761904762 | 0.04761904762 | 0             |  | inf          | #DIV/0! |
| C101929 | 0.04761904762 | 0.04761904762 | 0             |  | inf          | #DIV/0! |
| C101929 | 0             | 0             | 0             |  |              | #DIV/0! |
| C101929 | 0.04761904762 | 0.04761904762 | 0.05555555556 |  | 0.7          | #DIV/0! |
| C101929 | 0             | 0             | 0.05555555556 |  | 0            | #DIV/0! |
| C101929 | 0.04761904762 | 0.04761904762 | 0             |  | inf          | #DIV/0! |
| C101929 | 0.1428571429  | 0.1428571429  | 0.05555555556 |  | 2.333333333  | #DIV/0! |
| C101929 | 0             | 0             | 0.1111111111  |  | 0            | #DIV/0! |
| C101929 | 0             | 0             | 0.05555555556 |  | 0            | #DIV/0! |

|         |               |               |              |  |              |         |
|---------|---------------|---------------|--------------|--|--------------|---------|
| C101929 | 0.09523809524 | 0.09523809524 | 0.1666666667 |  | 0.4210526316 | #DIV/0! |
| C101929 | 0.04761904762 | 0.04761904762 | 0.0555555556 |  | 0.7          | #DIV/0! |
| C101929 | 0.04761904762 | 0.04761904762 | 0.0555555556 |  | 0.7          | #DIV/0! |
| C101929 | 0.1428571429  | 0.1428571429  | 0.0555555556 |  | 2.333333333  | #DIV/0! |
| C101930 | 0.04761904762 | 0.04761904762 | 0.0555555556 |  | 0.7          | #DIV/0! |
| C101930 | 0.04761904762 | 0.04761904762 | 0.0555555556 |  | 0.7          | #DIV/0! |
| C101930 | 0.04761904762 | 0.04761904762 | 0.2222222222 |  | 0.1375       | #DIV/0! |
| C101930 | 0.04761904762 | 0.04761904762 | 0.1111111111 |  | 0.325        | #DIV/0! |
| C101930 | 0             | 0             | 0.0555555556 |  | 0            | #DIV/0! |
| C101930 | 0.04761904762 | 0.04761904762 | 0.1111111111 |  | 0.325        | #DIV/0! |
| C102031 | 0.09523809524 | 0.09523809524 | 0.2222222222 |  | 0.2894736842 | #DIV/0! |
| C102467 | 0.04761904762 | 0.04761904762 | 0.0555555556 |  | 0.7          | #DIV/0! |
| C102467 | 0.04761904762 | 0.04761904762 | 0.0555555556 |  | 0.7          | #DIV/0! |
| C102467 | 0.04761904762 | 0.04761904762 | 0            |  | inf          | #DIV/0! |
| C102467 | 0.04761904762 | 0.04761904762 | 0            |  | inf          | #DIV/0! |
| C102467 | 0.09523809524 | 0.09523809524 | 0.1111111111 |  | 0.6842105263 | #DIV/0! |
| C102467 | 0.04761904762 | 0.04761904762 | 0            |  | inf          | #DIV/0! |
| C102503 | 0             | 0             | 0.0555555556 |  | 0            | #DIV/0! |
| C102546 | 0.04761904762 | 0.04761904762 | 0            |  | inf          | #DIV/0! |
| C102546 | 0             | 0             | 0.0555555556 |  | 0            | #DIV/0! |
| C102606 | 0.04761904762 | 0.04761904762 | 0.0555555556 |  | 0.7          | #DIV/0! |
| C102606 | 0.1904761905  | 0.1904761905  | 0.1111111111 |  | 1.529411765  | #DIV/0! |
| C102723 | 0.09523809524 | 0.09523809524 | 0.1111111111 |  | 0.6842105263 | #DIV/0! |
| C102723 | 0.1428571429  | 0.1428571429  | 0.1111111111 |  | 1.083333333  | #DIV/0! |
| C102723 | 0.04761904762 | 0.04761904762 | 0.0555555556 |  | 0.7          | #DIV/0! |
| C102723 | 0.04761904762 | 0.04761904762 | 0.0555555556 |  | 0.7          | #DIV/0! |
| C102723 | 0.09523809524 | 0.09523809524 | 0            |  | inf          | #DIV/0! |
| C102723 | 0.04761904762 | 0.04761904762 | 0            |  | inf          | #DIV/0! |
| C102723 | 0.04761904762 | 0.04761904762 | 0.0555555556 |  | 0.7          | #DIV/0! |
| C102723 | 0.1904761905  | 0.1904761905  | 0.0555555556 |  | 3.294117647  | #DIV/0! |
| C102723 | 0.04761904762 | 0.04761904762 | 0.0555555556 |  | 0.7          | #DIV/0! |
| C102723 | 0             | 0             | 0            |  |              | #DIV/0! |
| C102723 | 0.2857142857  | 0.2857142857  | 0.1111111111 |  | 2.6          | #DIV/0! |
| C102723 | 0.04761904762 | 0.04761904762 | 0.1111111111 |  | 0.325        | #DIV/0! |
| C102723 | 0.09523809524 | 0.09523809524 | 0.0555555556 |  | 1.473684211  | #DIV/0! |
| C102723 | 0.09523809524 | 0.09523809524 | 0.0555555556 |  | 1.473684211  | #DIV/0! |
| C102723 | 0.04761904762 | 0.04761904762 | 0            |  | inf          | #DIV/0! |
| C102723 | 0.1428571429  | 0.1428571429  | 0            |  | inf          | #DIV/0! |
| C102723 | 0.04761904762 | 0.04761904762 | 0.0555555556 |  | 0.7          | #DIV/0! |
| C102723 | 0.1428571429  | 0.1428571429  | 0            |  | inf          | #DIV/0! |
| C102723 | 0.04761904762 | 0.04761904762 | 0.1666666667 |  | 0.2          | #DIV/0! |
| C102723 | 0.04761904762 | 0.04761904762 | 0            |  | inf          | #DIV/0! |
| C102723 | 0.04761904762 | 0.04761904762 | 0.1111111111 |  | 0.325        | #DIV/0! |
| C102723 | 0.1428571429  | 0.1428571429  | 0            |  | inf          | #DIV/0! |
| C102723 | 0             | 0             | 0.0555555556 |  | 0            | #DIV/0! |
| C102723 | 0.1428571429  | 0.1428571429  | 0.2222222222 |  | 0.4583333333 | #DIV/0! |
| C102723 | 0.1428571429  | 0.1428571429  | 0            |  | inf          | #DIV/0! |
| C102723 | 0.09523809524 | 0.09523809524 | 0.1666666667 |  | 0.4210526316 | #DIV/0! |
| C102723 | 0.1428571429  | 0.1428571429  | 0            |  | inf          | #DIV/0! |
| C102723 | 0.09523809524 | 0.09523809524 | 0.0555555556 |  | 1.473684211  | #DIV/0! |
| C102723 | 0.09523809524 | 0.09523809524 | 0            |  | inf          | #DIV/0! |

|         |               |               |               |  |              |         |
|---------|---------------|---------------|---------------|--|--------------|---------|
| C102723 | 0             | 0             | 0.05555555556 |  | 0            | #DIV/0! |
| C102723 | 0.1904761905  | 0.1904761905  | 0             |  | inf          | #DIV/0! |
| C102723 | 0.09523809524 | 0.09523809524 | 0.1111111111  |  | 0.6842105263 | #DIV/0! |
| C102723 | 0.09523809524 | 0.09523809524 | 0.1111111111  |  | 0.6842105263 | #DIV/0! |
| C102723 | 0.04761904762 | 0.04761904762 | 0.1111111111  |  | 0.325        | #DIV/0! |
| C102724 | 0             | 0             | 0.1111111111  |  | 0            | #DIV/0! |
| C102724 | 0.04761904762 | 0.04761904762 | 0.1111111111  |  | 0.325        | #DIV/0! |
| C102724 | 0.04761904762 | 0.04761904762 | 0.05555555556 |  | 0.7          | #DIV/0! |
| C102724 | 0.04761904762 | 0.04761904762 | 0.05555555556 |  | 0.7          | #DIV/0! |
| C102724 | 0             | 0             | 0.05555555556 |  | 0            | #DIV/0! |
| C102724 | 0.09523809524 | 0.09523809524 | 0             |  | inf          | #DIV/0! |
| C102724 | 0.04761904762 | 0.04761904762 | 0.05555555556 |  | 0.7          | #DIV/0! |
| C102724 | 0.04761904762 | 0.04761904762 | 0.05555555556 |  | 0.7          | #DIV/0! |
| C102724 | 0             | 0             | 0.1111111111  |  | 0            | #DIV/0! |
| C102724 | 0             | 0             | 0.05555555556 |  | 0            | #DIV/0! |
| C102724 | 0.04761904762 | 0.04761904762 | 0.1111111111  |  | 0.325        | #DIV/0! |
| C102724 | 0.04761904762 | 0.04761904762 | 0             |  | inf          | #DIV/0! |
| C102724 | 0.1904761905  | 0.1904761905  | 0.05555555556 |  | 3.294117647  | #DIV/0! |
| C102724 | 0.1428571429  | 0.1428571429  | 0.05555555556 |  | 2.333333333  | #DIV/0! |
| C102724 | 0             | 0             | 0.1111111111  |  | 0            | #DIV/0! |
| C102724 | 0.04761904762 | 0.04761904762 | 0.05555555556 |  | 0.7          | #DIV/0! |
| C102724 | 0.09523809524 | 0.09523809524 | 0.05555555556 |  | 1.473684211  | #DIV/0! |
| C102724 | 0.04761904762 | 0.04761904762 | 0.1111111111  |  | 0.325        | #DIV/0! |
| C102724 | 0             | 0             | 0.05555555556 |  | 0            | #DIV/0! |
| C102724 | 0.04761904762 | 0.04761904762 | 0.05555555556 |  | 0.7          | #DIV/0! |
| C102724 | 0.04761904762 | 0.04761904762 | 0             |  | inf          | #DIV/0! |
| C102724 | 0.04761904762 | 0.04761904762 | 0.1666666667  |  | 0.2          | #DIV/0! |
| C102724 | 0.1428571429  | 0.1428571429  | 0             |  | inf          | #DIV/0! |
| C102724 | 0.04761904762 | 0.04761904762 | 0.05555555556 |  | 0.7          | #DIV/0! |
| C102724 | 0.04761904762 | 0.04761904762 | 0.1111111111  |  | 0.325        | #DIV/0! |
| C102724 | 0             | 0             | 0.05555555556 |  | 0            | #DIV/0! |
| C102724 | 0.09523809524 | 0.09523809524 | 0.2222222222  |  | 0.2894736842 | #DIV/0! |
| C102724 | 0.1428571429  | 0.1428571429  | 0.05555555556 |  | 2.333333333  | #DIV/0! |
| C102724 | 0.1428571429  | 0.1428571429  | 0             |  | inf          | #DIV/0! |
| C102724 | 0.1428571429  | 0.1428571429  | 0             |  | inf          | #DIV/0! |
| C102724 | 0.1428571429  | 0.1428571429  | 0.05555555556 |  | 2.333333333  | #DIV/0! |
| C102724 | 0.1428571429  | 0.1428571429  | 0.1666666667  |  | 0.6666666667 | #DIV/0! |
| C102724 | 0.04761904762 | 0.04761904762 | 0.1111111111  |  | 0.325        | #DIV/0! |
| C102724 | 0             | 0             | 0.05555555556 |  | 0            | #DIV/0! |
| C102724 | 0.1428571429  | 0.1428571429  | 0.1666666667  |  | 0.6666666667 | #DIV/0! |
| C102724 | 0.1904761905  | 0.1904761905  | 0.1111111111  |  | 1.529411765  | #DIV/0! |
| C102724 | 0.04761904762 | 0.04761904762 | 0.05555555556 |  | 0.7          | #DIV/0! |
| C102724 | 0.04761904762 | 0.04761904762 | 0.05555555556 |  | 0.7          | #DIV/0! |
| C102724 | 0.09523809524 | 0.09523809524 | 0.05555555556 |  | 1.473684211  | #DIV/0! |
| C102724 | 0.2380952381  | 0.2380952381  | 0.1111111111  |  | 2.03125      | #DIV/0! |
| C102724 | 0.04761904762 | 0.04761904762 | 0.05555555556 |  | 0.7          | #DIV/0! |
| C102724 | 0             | 0             | 0.05555555556 |  | 0            | #DIV/0! |
| C102724 | 0.04761904762 | 0.04761904762 | 0.05555555556 |  | 0.7          | #DIV/0! |
| C102724 | 0.1904761905  | 0.1904761905  | 0.1666666667  |  | 0.9411764706 | #DIV/0! |
| C102724 | 0             | 0             | 0.05555555556 |  | 0            | #DIV/0! |
| C102724 | 0.1904761905  | 0.1904761905  | 0.1111111111  |  | 1.529411765  | #DIV/0! |

|         |               |               |               |  |              |         |
|---------|---------------|---------------|---------------|--|--------------|---------|
| C102724 | 0.09523809524 | 0.09523809524 | 0.222222222   |  | 0.2894736842 | #DIV/0! |
| C102724 | 0.09523809524 | 0.09523809524 | 0.05555555556 |  | 1.473684211  | #DIV/0! |
| C102724 | 0.1428571429  | 0.1428571429  | 0.05555555556 |  | 2.333333333  | #DIV/0! |
| C102724 | 0.04761904762 | 0.04761904762 | 0.1111111111  |  | 0.325        | #DIV/0! |
| C102724 | 0.04761904762 | 0.04761904762 | 0.1666666667  |  | 0.2          | #DIV/0! |
| C102724 | 0.09523809524 | 0.09523809524 | 0.1666666667  |  | 0.4210526316 | #DIV/0! |
| C102725 | 0.04761904762 | 0.04761904762 | 0.05555555556 |  | 0.7          | #DIV/0! |
| C102725 | 0.09523809524 | 0.09523809524 | 0.1111111111  |  | 0.6842105263 | #DIV/0! |
| C102725 | 0.04761904762 | 0.04761904762 | 0.222222222   |  | 0.1375       | #DIV/0! |
| C102725 | 0.04761904762 | 0.04761904762 | 0.222222222   |  | 0.1375       | #DIV/0! |
| C102725 | 0             | 0             | 0.05555555556 |  | 0            | #DIV/0! |
| C102725 | 0.1428571429  | 0.1428571429  | 0.1111111111  |  | 1.083333333  | #DIV/0! |
| C103021 | 0             | 0             | 0.1111111111  |  | 0            | #DIV/0! |
| C103171 | 0.04761904762 | 0.04761904762 | 0.05555555556 |  | 0.7          | #DIV/0! |
| C103312 | 0.04761904762 | 0.04761904762 | 0             |  | inf          | #DIV/0! |
| C103344 | 0.1428571429  | 0.1428571429  | 0.05555555556 |  | 2.333333333  | #DIV/0! |
| C103908 | 0.1428571429  | 0.1428571429  | 0.05555555556 |  | 2.333333333  | #DIV/0! |
| C103908 | 0.1428571429  | 0.1428571429  | 0.05555555556 |  | 2.333333333  | #DIV/0! |
| C104054 | 0.1904761905  | 0.1904761905  | 0.1111111111  |  | 1.529411765  | #DIV/0! |
| C104613 | 0.04761904762 | 0.04761904762 | 0.05555555556 |  | 0.7          | #DIV/0! |
| C104968 | 0.09523809524 | 0.09523809524 | 0             |  | inf          | #DIV/0! |
| C105274 | 0.04761904762 | 0.04761904762 | 0             |  | inf          | #DIV/0! |
| C105369 | 0.09523809524 | 0.09523809524 | 0.05555555556 |  | 1.473684211  | #DIV/0! |
| C105369 | 0.04761904762 | 0.04761904762 | 0.1666666667  |  | 0.2          | #DIV/0! |
| C105369 | 0.1904761905  | 0.1904761905  | 0.1111111111  |  | 1.529411765  | #DIV/0! |
| C105369 | 0.09523809524 | 0.09523809524 | 0.05555555556 |  | 1.473684211  | #DIV/0! |
| C105369 | 0.09523809524 | 0.09523809524 | 0.05555555556 |  | 1.473684211  | #DIV/0! |
| C105369 | 0.04761904762 | 0.04761904762 | 0.05555555556 |  | 0.7          | #DIV/0! |
| C105369 | 0.1428571429  | 0.1428571429  | 0.222222222   |  | 0.4583333333 | #DIV/0! |
| C105369 | 0.04761904762 | 0.04761904762 | 0.05555555556 |  | 0.7          | #DIV/0! |
| C105369 | 0.1428571429  | 0.1428571429  | 0             |  | inf          | #DIV/0! |
| C105369 | 0.2380952381  | 0.2380952381  | 0.1111111111  |  | 2.03125      | #DIV/0! |
| C105369 | 0.04761904762 | 0.04761904762 | 0.1666666667  |  | 0.2          | #DIV/0! |
| C105369 | 0.04761904762 | 0.04761904762 | 0.1111111111  |  | 0.325        | #DIV/0! |
| C105369 | 0.04761904762 | 0.04761904762 | 0.1111111111  |  | 0.325        | #DIV/0! |
| C105369 | 0.04761904762 | 0.04761904762 | 0.05555555556 |  | 0.7          | #DIV/0! |
| C105369 | 0.04761904762 | 0.04761904762 | 0.1111111111  |  | 0.325        | #DIV/0! |
| C105369 | 0.04761904762 | 0.04761904762 | 0.05555555556 |  | 0.7          | #DIV/0! |
| C105369 | 0.09523809524 | 0.09523809524 | 0.05555555556 |  | 1.473684211  | #DIV/0! |
| C105369 | 0.04761904762 | 0.04761904762 | 0.05555555556 |  | 0.7          | #DIV/0! |
| C105369 | 0.04761904762 | 0.04761904762 | 0.05555555556 |  | 0.7          | #DIV/0! |
| C105369 | 0.04761904762 | 0.04761904762 | 0.05555555556 |  | 0.7          | #DIV/0! |
| C105369 | 0.04761904762 | 0.04761904762 | 0.05555555556 |  | 0.7          | #DIV/0! |
| C105369 | 0.04761904762 | 0.04761904762 | 0.05555555556 |  | 0.7          | #DIV/0! |
| C105369 | 0.04761904762 | 0.04761904762 | 0.05555555556 |  | 0.7          | #DIV/0! |
| C105369 | 0             | 0             | 0.1111111111  |  | 0            | #DIV/0! |
| C105370 | 0             | 0             | 0.05555555556 |  | 0            | #DIV/0! |
| C105370 | 0.09523809524 | 0.09523809524 | 0.05555555556 |  | 1.473684211  | #DIV/0! |
| C105370 | 0             | 0             | 0.05555555556 |  | 0            | #DIV/0! |
| C105370 | 0.04761904762 | 0.04761904762 | 0.05555555556 |  | 0.7          | #DIV/0! |
| C105370 | 0.04761904762 | 0.04761904762 | 0             |  | inf          | #DIV/0! |
| C105370 | 0.04761904762 | 0.04761904762 | 0             |  | inf          | #DIV/0! |

|         |               |               |               |  |              |         |
|---------|---------------|---------------|---------------|--|--------------|---------|
| C105370 | 0.04761904762 | 0.04761904762 | 0             |  | inf          | #DIV/0! |
| C105370 | 0.04761904762 | 0.04761904762 | 0.05555555556 |  | 0.7          | #DIV/0! |
| C105370 | 0             | 0             | 0             |  |              | #DIV/0! |
| C105370 | 0.04761904762 | 0.04761904762 | 0.05555555556 |  | 0.7          | #DIV/0! |
| C105370 | 0.04761904762 | 0.04761904762 | 0.05555555556 |  | 0.7          | #DIV/0! |
| C105371 | 0.04761904762 | 0.04761904762 | 0.05555555556 |  | 0.7          | #DIV/0! |
| C105371 | 0.04761904762 | 0.04761904762 | 0.2222222222  |  | 0.1375       | #DIV/0! |
| C105371 | 0.09523809524 | 0.09523809524 | 0.2222222222  |  | 0.2894736842 | #DIV/0! |
| C105371 | 0.09523809524 | 0.09523809524 | 0.2222222222  |  | 0.2894736842 | #DIV/0! |
| C105371 | 0.09523809524 | 0.09523809524 | 0.2222222222  |  | 0.2894736842 | #DIV/0! |
| C105371 | 0.04761904762 | 0.04761904762 | 0             |  | inf          | #DIV/0! |
| C105371 | 0.04761904762 | 0.04761904762 | 0.2222222222  |  | 0.1375       | #DIV/0! |
| C105371 | 0.1428571429  | 0.1428571429  | 0.05555555556 |  | 2.333333333  | #DIV/0! |
| C105371 | 0.04761904762 | 0.04761904762 | 0.05555555556 |  | 0.7          | #DIV/0! |
| C105371 | 0.1428571429  | 0.1428571429  | 0.05555555556 |  | 2.333333333  | #DIV/0! |
| C105371 | 0.04761904762 | 0.04761904762 | 0             |  | inf          | #DIV/0! |
| C105371 | 0.09523809524 | 0.09523809524 | 0             |  | inf          | #DIV/0! |
| C105371 | 0             | 0             | 0.1111111111  |  | 0            | #DIV/0! |
| C105371 | 0.1904761905  | 0.1904761905  | 0.05555555556 |  | 3.294117647  | #DIV/0! |
| C105371 | 0.1428571429  | 0.1428571429  | 0.05555555556 |  | 2.333333333  | #DIV/0! |
| C105371 | 0             | 0             | 0.1111111111  |  | 0            | #DIV/0! |
| C105371 | 0             | 0             | 0.05555555556 |  | 0            | #DIV/0! |
| C105371 | 0             | 0             | 0.1111111111  |  | 0            | #DIV/0! |
| C105371 | 0.09523809524 | 0.09523809524 | 0.05555555556 |  | 1.473684211  | #DIV/0! |
| C105371 | 0             | 0             | 0             |  |              | #DIV/0! |
| C105371 | 0.04761904762 | 0.04761904762 | 0             |  | inf          | #DIV/0! |
| C105371 | 0.09523809524 | 0.09523809524 | 0             |  | inf          | #DIV/0! |
| C105371 | 0.1428571429  | 0.1428571429  | 0             |  | inf          | #DIV/0! |
| C105371 | 0.1428571429  | 0.1428571429  | 0             |  | inf          | #DIV/0! |
| C105371 | 0.09523809524 | 0.09523809524 | 0             |  | inf          | #DIV/0! |
| C105371 | 0.1428571429  | 0.1428571429  | 0             |  | inf          | #DIV/0! |
| C105371 | 0.04761904762 | 0.04761904762 | 0             |  | inf          | #DIV/0! |
| C105371 | 0             | 0             | 0             |  |              | #DIV/0! |
| C105371 | 0.04761904762 | 0.04761904762 | 0             |  | inf          | #DIV/0! |
| C105371 | 0.04761904762 | 0.04761904762 | 0             |  | inf          | #DIV/0! |
| C105371 | 0.04761904762 | 0.04761904762 | 0             |  | inf          | #DIV/0! |
| C105371 | 0.09523809524 | 0.09523809524 | 0.05555555556 |  | 1.473684211  | #DIV/0! |
| C105372 | 0.09523809524 | 0.09523809524 | 0.1111111111  |  | 0.6842105263 | #DIV/0! |
| C105372 | 0.09523809524 | 0.09523809524 | 0.05555555556 |  | 1.473684211  | #DIV/0! |
| C105372 | 0.04761904762 | 0.04761904762 | 0             |  | inf          | #DIV/0! |
| C105372 | 0.04761904762 | 0.04761904762 | 0             |  | inf          | #DIV/0! |
| C105372 | 0.04761904762 | 0.04761904762 | 0             |  | inf          | #DIV/0! |
| C105372 | 0.1428571429  | 0.1428571429  | 0.1111111111  |  | 1.083333333  | #DIV/0! |
| C105372 | 0.04761904762 | 0.04761904762 | 0.05555555556 |  | 0.7          | #DIV/0! |
| C105372 | 0.04761904762 | 0.04761904762 | 0.05555555556 |  | 0.7          | #DIV/0! |
| C105372 | 0.09523809524 | 0.09523809524 | 0.05555555556 |  | 1.473684211  | #DIV/0! |
| C105372 | 0.09523809524 | 0.09523809524 | 0.05555555556 |  | 1.473684211  | #DIV/0! |
| C105372 | 0.1428571429  | 0.1428571429  | 0.05555555556 |  | 2.333333333  | #DIV/0! |
| C105372 | 0.1428571429  | 0.1428571429  | 0.05555555556 |  | 2.333333333  | #DIV/0! |
| C105372 | 0.1904761905  | 0.1904761905  | 0.1111111111  |  | 1.529411765  | #DIV/0! |
| C105372 | 0.1904761905  | 0.1904761905  | 0.05555555556 |  | 3.294117647  | #DIV/0! |

|         |               |               |              |  |              |         |
|---------|---------------|---------------|--------------|--|--------------|---------|
| C105372 | 0.1428571429  | 0.1428571429  | 0.1666666667 |  | 0.6666666667 | #DIV/0! |
| C105372 | 0.1428571429  | 0.1428571429  | 0.1666666667 |  | 0.6666666667 | #DIV/0! |
| C105372 | 0.09523809524 | 0.09523809524 | 0.1666666667 |  | 0.4210526316 | #DIV/0! |
| C105372 | 0.09523809524 | 0.09523809524 | 0.1111111111 |  | 0.6842105263 | #DIV/0! |
| C105372 | 0.1428571429  | 0.1428571429  | 0.2222222222 |  | 0.4583333333 | #DIV/0! |
| C105372 | 0.04761904762 | 0.04761904762 | 0.1666666667 |  | 0.2          | #DIV/0! |
| C105372 | 0.04761904762 | 0.04761904762 | 0.1111111111 |  | 0.325        | #DIV/0! |
| C105372 | 0.04761904762 | 0.04761904762 | 0.1111111111 |  | 0.325        | #DIV/0! |
| C105372 | 0.04761904762 | 0.04761904762 | 0.1111111111 |  | 0.325        | #DIV/0! |
| C105373 | 0             | 0             | 0.1111111111 |  | 0            | #DIV/0! |
| C105373 | 0.04761904762 | 0.04761904762 | 0.1111111111 |  | 0.325        | #DIV/0! |
| C105373 | 0             | 0             | 0.1111111111 |  | 0            | #DIV/0! |
| C105373 | 0             | 0             | 0.1666666667 |  | 0            | #DIV/0! |
| C105373 | 0             | 0             | 0.1111111111 |  | 0            | #DIV/0! |
| C105373 | 0             | 0             | 0.1111111111 |  | 0            | #DIV/0! |
| C105373 | 0.1428571429  | 0.1428571429  | 0            |  | inf          | #DIV/0! |
| C105373 | 0             | 0             | 0.0555555556 |  | 0            | #DIV/0! |
| C105373 | 0             | 0             | 0.0555555556 |  | 0            | #DIV/0! |
| C105373 | 0             | 0             | 0.1111111111 |  | 0            | #DIV/0! |
| C105373 | 0             | 0             | 0.0555555556 |  | 0            | #DIV/0! |
| C105373 | 0             | 0             | 0.0555555556 |  | 0            | #DIV/0! |
| C105373 | 0             | 0             | 0.0555555556 |  | 0            | #DIV/0! |
| C105373 | 0             | 0             | 0.0555555556 |  | 0            | #DIV/0! |
| C105373 | 0             | 0             | 0.1111111111 |  | 0            | #DIV/0! |
| C105373 | 0             | 0             | 0.1111111111 |  | 0            | #DIV/0! |
| C105373 | 0             | 0             | 0.0555555556 |  | 0            | #DIV/0! |
| C105373 | 0             | 0             | 0.1111111111 |  | 0            | #DIV/0! |
| C105373 | 0             | 0             | 0.1111111111 |  | 0            | #DIV/0! |
| C105374 | 0.09523809524 | 0.09523809524 | 0.0555555556 |  | 1.473684211  | #DIV/0! |
| C105374 | 0.09523809524 | 0.09523809524 | 0.0555555556 |  | 1.473684211  | #DIV/0! |
| C105374 | 0.1428571429  | 0.1428571429  | 0.0555555556 |  | 2.333333333  | #DIV/0! |
| C105374 | 0.1428571429  | 0.1428571429  | 0.0555555556 |  | 2.333333333  | #DIV/0! |
| C105374 | 0.1428571429  | 0.1428571429  | 0.0555555556 |  | 2.333333333  | #DIV/0! |
| C105374 | 0.04761904762 | 0.04761904762 | 0.0555555556 |  | 0.7          | #DIV/0! |
| C105374 | 0.1904761905  | 0.1904761905  | 0.1111111111 |  | 1.529411765  | #DIV/0! |
| C105374 | 0.04761904762 | 0.04761904762 | 0            |  | inf          | #DIV/0! |
| C105374 | 0.04761904762 | 0.04761904762 | 0            |  | inf          | #DIV/0! |
| C105374 | 0             | 0             | 0.0555555556 |  | 0            | #DIV/0! |
| C105374 | 0             | 0             | 0.0555555556 |  | 0            | #DIV/0! |
| C105374 | 0.04761904762 | 0.04761904762 | 0            |  | inf          | #DIV/0! |
| C105374 | 0             | 0             | 0.1111111111 |  | 0            | #DIV/0! |
| C105374 | 0.04761904762 | 0.04761904762 | 0.0555555556 |  | 0.7          | #DIV/0! |
| C105374 | 0.09523809524 | 0.09523809524 | 0.0555555556 |  | 1.473684211  | #DIV/0! |
| C105374 | 0             | 0             | 0.0555555556 |  | 0            | #DIV/0! |
| C105374 | 0             | 0             | 0.0555555556 |  | 0            | #DIV/0! |
| C105375 | 0.04761904762 | 0.04761904762 | 0.0555555556 |  | 0.7          | #DIV/0! |
| C105375 | 0.04761904762 | 0.04761904762 | 0.1666666667 |  | 0.2          | #DIV/0! |
| C105375 | 0.09523809524 | 0.09523809524 | 0.1666666667 |  | 0.4210526316 | #DIV/0! |
| C105375 | 0.04761904762 | 0.04761904762 | 0.2222222222 |  | 0.1375       | #DIV/0! |
| C105375 | 0.04761904762 | 0.04761904762 | 0.1666666667 |  | 0.2          | #DIV/0! |
| C105375 | 0.1428571429  | 0.1428571429  | 0.1666666667 |  | 0.6666666667 | #DIV/0! |



|         |               |               |               |  |              |         |
|---------|---------------|---------------|---------------|--|--------------|---------|
| C105375 | 0.04761904762 | 0.04761904762 | 0.222222222   |  | 0.1375       | #DIV/0! |
| C105375 | 0.04761904762 | 0.04761904762 | 0.111111111   |  | 0.325        | #DIV/0! |
| C105375 | 0.04761904762 | 0.04761904762 | 0.05555555556 |  | 0.7          | #DIV/0! |
| C105375 | 0.04761904762 | 0.04761904762 | 0.05555555556 |  | 0.7          | #DIV/0! |
| C105375 | 0.04761904762 | 0.04761904762 | 0.05555555556 |  | 0.7          | #DIV/0! |
| C105375 | 0.04761904762 | 0.04761904762 | 0.05555555556 |  | 0.7          | #DIV/0! |
| C105375 | 0.04761904762 | 0.04761904762 | 0.05555555556 |  | 0.7          | #DIV/0! |
| C105375 | 0.04761904762 | 0.04761904762 | 0.05555555556 |  | 0.7          | #DIV/0! |
| C105375 | 0.09523809524 | 0.09523809524 | 0.05555555556 |  | 1.473684211  | #DIV/0! |
| C105375 | 0.1904761905  | 0.1904761905  | 0.111111111   |  | 1.529411765  | #DIV/0! |
| C105375 | 0.1904761905  | 0.1904761905  | 0.1666666667  |  | 0.9411764706 | #DIV/0! |
| C105375 | 0.1428571429  | 0.1428571429  | 0.111111111   |  | 1.083333333  | #DIV/0! |
| C105375 | 0.04761904762 | 0.04761904762 | 0.222222222   |  | 0.1375       | #DIV/0! |
| C105375 | 0.04761904762 | 0.04761904762 | 0.222222222   |  | 0.1375       | #DIV/0! |
| C105375 | 0.04761904762 | 0.04761904762 | 0.1666666667  |  | 0.2          | #DIV/0! |
| C105375 | 0.1428571429  | 0.1428571429  | 0.111111111   |  | 1.083333333  | #DIV/0! |
| C105375 | 0.04761904762 | 0.04761904762 | 0.05555555556 |  | 0.7          | #DIV/0! |
| C105376 | 0             | 0             | 0.05555555556 |  | 0            | #DIV/0! |
| C105376 | 0.04761904762 | 0.04761904762 | 0             |  | inf          | #DIV/0! |
| C105376 | 0.09523809524 | 0.09523809524 | 0.05555555556 |  | 1.473684211  | #DIV/0! |
| C105376 | 0.04761904762 | 0.04761904762 | 0             |  | inf          | #DIV/0! |
| C105376 | 0.09523809524 | 0.09523809524 | 0             |  | inf          | #DIV/0! |
| C105376 | 0.04761904762 | 0.04761904762 | 0.1666666667  |  | 0.2          | #DIV/0! |
| C105376 | 0.09523809524 | 0.09523809524 | 0.111111111   |  | 0.6842105263 | #DIV/0! |
| C105376 | 0.09523809524 | 0.09523809524 | 0.111111111   |  | 0.6842105263 | #DIV/0! |
| C105376 | 0.04761904762 | 0.04761904762 | 0.05555555556 |  | 0.7          | #DIV/0! |
| C105376 | 0.04761904762 | 0.04761904762 | 0.111111111   |  | 0.325        | #DIV/0! |
| C105376 | 0.09523809524 | 0.09523809524 | 0             |  | inf          | #DIV/0! |
| C105376 | 0.04761904762 | 0.04761904762 | 0             |  | inf          | #DIV/0! |
| C105377 | 0.09523809524 | 0.09523809524 | 0             |  | inf          | #DIV/0! |
| C105377 | 0.04761904762 | 0.04761904762 | 0             |  | inf          | #DIV/0! |
| C105377 | 0.04761904762 | 0.04761904762 | 0             |  | inf          | #DIV/0! |
| C105377 | 0.04761904762 | 0.04761904762 | 0             |  | inf          | #DIV/0! |
| C105377 | 0.04761904762 | 0.04761904762 | 0.05555555556 |  | 0.7          | #DIV/0! |
| C105377 | 0             | 0             | 0.05555555556 |  | 0            | #DIV/0! |
| C105377 | 0             | 0             | 0.05555555556 |  | 0            | #DIV/0! |
| C105377 | 0.04761904762 | 0.04761904762 | 0.05555555556 |  | 0.7          | #DIV/0! |
| C105377 | 0             | 0             | 0.05555555556 |  | 0            | #DIV/0! |
| C105377 | 0             | 0             | 0.05555555556 |  | 0            | #DIV/0! |
| C105377 | 0             | 0             | 0.05555555556 |  | 0            | #DIV/0! |
| C105377 | 0             | 0             | 0.05555555556 |  | 0            | #DIV/0! |
| C105377 | 0             | 0             | 0.05555555556 |  | 0            | #DIV/0! |
| C105377 | 0             | 0             | 0.05555555556 |  | 0            | #DIV/0! |
| C105377 | 0             | 0             | 0.05555555556 |  | 0            | #DIV/0! |
| C105377 | 0.09523809524 | 0.09523809524 | 0.05555555556 |  | 1.473684211  | #DIV/0! |
| C105377 | 0.09523809524 | 0.09523809524 | 0.05555555556 |  | 1.473684211  | #DIV/0! |
| C105377 | 0.09523809524 | 0.09523809524 | 0.111111111   |  | 0.6842105263 | #DIV/0! |
| C105378 | 0.1428571429  | 0.1428571429  | 0.05555555556 |  | 2.333333333  | #DIV/0! |
| C105378 | 0.1428571429  | 0.1428571429  | 0.05555555556 |  | 2.333333333  | #DIV/0! |
| C105378 | 0.04761904762 | 0.04761904762 | 0.05555555556 |  | 0.7          | #DIV/0! |
| C105378 | 0.09523809524 | 0.09523809524 | 0.05555555556 |  | 1.473684211  | #DIV/0! |
| C105378 | 0.09523809524 | 0.09523809524 | 0.111111111   |  | 0.6842105263 | #DIV/0! |

|         |               |               |               |  |              |         |
|---------|---------------|---------------|---------------|--|--------------|---------|
| C105378 | 0.1428571429  | 0.1428571429  | 0.05555555556 |  | 2.333333333  | #DIV/0! |
| C105378 | 0.1428571429  | 0.1428571429  | 0.1111111111  |  | 1.083333333  | #DIV/0! |
| C105378 | 0.1428571429  | 0.1428571429  | 0.05555555556 |  | 2.333333333  | #DIV/0! |
| C105378 | 0             | 0             | 0.1111111111  |  | 0            | #DIV/0! |
| C105378 | 0             | 0             | 0.1111111111  |  | 0            | #DIV/0! |
| C105378 | 0.04761904762 | 0.04761904762 | 0.1111111111  |  | 0.325        | #DIV/0! |
| C105378 | 0.04761904762 | 0.04761904762 | 0.05555555556 |  | 0.7          | #DIV/0! |
| C105378 | 0.04761904762 | 0.04761904762 | 0.05555555556 |  | 0.7          | #DIV/0! |
| C105378 | 0.04761904762 | 0.04761904762 | 0.05555555556 |  | 0.7          | #DIV/0! |
| C105378 | 0.04761904762 | 0.04761904762 | 0.05555555556 |  | 0.7          | #DIV/0! |
| C105379 | 0             | 0             | 0.05555555556 |  | 0            | #DIV/0! |
| C105379 | 0.04761904762 | 0.04761904762 | 0             |  | inf          | #DIV/0! |
| C105379 | 0.04761904762 | 0.04761904762 | 0             |  | inf          | #DIV/0! |
| C105379 | 0.04761904762 | 0.04761904762 | 0             |  | inf          | #DIV/0! |
| C105379 | 0.04761904762 | 0.04761904762 | 0             |  | inf          | #DIV/0! |
| C105379 | 0.04761904762 | 0.04761904762 | 0             |  | inf          | #DIV/0! |
| C105379 | 0.1904761905  | 0.1904761905  | 0.2222222222  |  | 0.6470588235 | #DIV/0! |
| C105379 | 0.04761904762 | 0.04761904762 | 0.1111111111  |  | 0.325        | #DIV/0! |
| C105379 | 0.09523809524 | 0.09523809524 | 0.1666666667  |  | 0.4210526316 | #DIV/0! |
| C105379 | 0.1904761905  | 0.1904761905  | 0.2222222222  |  | 0.6470588235 | #DIV/0! |
| C105379 | 0.04761904762 | 0.04761904762 | 0.1111111111  |  | 0.325        | #DIV/0! |
| C105379 | 0.1904761905  | 0.1904761905  | 0.05555555556 |  | 3.294117647  | #DIV/0! |
| C105379 | 0.04761904762 | 0.04761904762 | 0.05555555556 |  | 0.7          | #DIV/0! |
| C105379 | 0.04761904762 | 0.04761904762 | 0.05555555556 |  | 0.7          | #DIV/0! |
| C105379 | 0.1428571429  | 0.1428571429  | 0.2222222222  |  | 0.4583333333 | #DIV/0! |
| C105447 | 0.09523809524 | 0.09523809524 | 0.1111111111  |  | 0.6842105263 | #DIV/0! |
| C105616 | 0.04761904762 | 0.04761904762 | 0.05555555556 |  | 0.7          | #DIV/0! |
| C105747 | 0             | 0             | 0.05555555556 |  | 0            | #DIV/0! |
| C106660 | 0.09523809524 | 0.09523809524 | 0.2222222222  |  | 0.2894736842 | #DIV/0! |
| C106699 | 0.09523809524 | 0.09523809524 | 0.05555555556 |  | 1.473684211  | #DIV/0! |
| C106780 | 0.04761904762 | 0.04761904762 | 0.1666666667  |  | 0.2          | #DIV/0! |
| C107001 | 0.1428571429  | 0.1428571429  | 0.05555555556 |  | 2.333333333  | #DIV/0! |
| C107105 | 0             | 0             | 0.05555555556 |  | 0            | #DIV/0! |
| C107984 | 0.1428571429  | 0.1428571429  | 0.05555555556 |  | 2.333333333  | #DIV/0! |
| C107984 | 0             | 0             | 0.05555555556 |  | 0            | #DIV/0! |
| C107984 | 0.04761904762 | 0.04761904762 | 0             |  | inf          | #DIV/0! |
| C107984 | 0.09523809524 | 0.09523809524 | 0.1111111111  |  | 0.6842105263 | #DIV/0! |
| C107984 | 0.04761904762 | 0.04761904762 | 0.1111111111  |  | 0.325        | #DIV/0! |
| C107984 | 0.1428571429  | 0.1428571429  | 0.05555555556 |  | 2.333333333  | #DIV/0! |
| C107984 | 0.2380952381  | 0.2380952381  | 0             |  | inf          | #DIV/0! |
| C107984 | 0.04761904762 | 0.04761904762 | 0.1111111111  |  | 0.325        | #DIV/0! |
| C107984 | 0.04761904762 | 0.04761904762 | 0.05555555556 |  | 0.7          | #DIV/0! |
| C107984 | 0.1428571429  | 0.1428571429  | 0.05555555556 |  | 2.333333333  | #DIV/0! |
| C107984 | 0             | 0             | 0             |  |              | #DIV/0! |
| C107985 | 0.04761904762 | 0.04761904762 | 0             |  | inf          | #DIV/0! |
| C107985 | 0.04761904762 | 0.04761904762 | 0             |  | inf          | #DIV/0! |
| C107985 | 0.1428571429  | 0.1428571429  | 0             |  | inf          | #DIV/0! |
| C107985 | 0.1428571429  | 0.1428571429  | 0             |  | inf          | #DIV/0! |
| C107985 | 0.04761904762 | 0.04761904762 | 0.1111111111  |  | 0.325        | #DIV/0! |
| C107985 | 0             | 0             | 0.05555555556 |  | 0            | #DIV/0! |
| C107985 | 0             | 0             | 0.05555555556 |  | 0            | #DIV/0! |

|         |               |               |               |  |              |         |
|---------|---------------|---------------|---------------|--|--------------|---------|
| C107985 | 0.04761904762 | 0.04761904762 | 0.05555555556 |  | 0.7          | #DIV/0! |
| C107985 | 0             | 0             | 0.05555555556 |  | 0            | #DIV/0! |
| C107985 | 0.04761904762 | 0.04761904762 | 0.05555555556 |  | 0.7          | #DIV/0! |
| C107986 | 0.1428571429  | 0.1428571429  | 0.05555555556 |  | 2.333333333  | #DIV/0! |
| C107986 | 0.04761904762 | 0.04761904762 | 0             |  | inf          | #DIV/0! |
| C107986 | 0.1428571429  | 0.1428571429  | 0.1666666667  |  | 0.6666666667 | #DIV/0! |
| C107986 | 0.04761904762 | 0.04761904762 | 0.05555555556 |  | 0.7          | #DIV/0! |
| C107986 | 0.09523809524 | 0.09523809524 | 0.1111111111  |  | 0.6842105263 | #DIV/0! |
| C107987 | 0.04761904762 | 0.04761904762 | 0.05555555556 |  | 0.7          | #DIV/0! |
| C108783 | 0             | 0             | 0.05555555556 |  | 0            | #DIV/0! |
| C110091 | 0.04761904762 | 0.04761904762 | 0.05555555556 |  | 0.7          | #DIV/0! |
| C110091 | 0.04761904762 | 0.04761904762 | 0             |  | inf          | #DIV/0! |
| C110091 | 0.04761904762 | 0.04761904762 | 0             |  | inf          | #DIV/0! |
| C117498 | 0.04761904762 | 0.04761904762 | 0.05555555556 |  | 0.7          | #DIV/0! |
| C110384 | 0.04761904762 | 0.04761904762 | 0             |  | inf          | #DIV/0! |
| C112267 | 0.04761904762 | 0.04761904762 | 0.1111111111  |  | 0.325        | #DIV/0! |
| C112267 | 0.09523809524 | 0.09523809524 | 0.05555555556 |  | 1.473684211  | #DIV/0! |
| C112267 | 0.04761904762 | 0.04761904762 | 0.2222222222  |  | 0.1375       | #DIV/0! |
| C112268 | 0.09523809524 | 0.09523809524 | 0.05555555556 |  | 1.473684211  | #DIV/0! |
| C112268 | 0.04761904762 | 0.04761904762 | 0.1111111111  |  | 0.325        | #DIV/0! |
| C112268 | 0.09523809524 | 0.09523809524 | 0             |  | inf          | #DIV/0! |
| C112268 | 0.09523809524 | 0.09523809524 | 0             |  | inf          | #DIV/0! |
| C112268 | 0.04761904762 | 0.04761904762 | 0             |  | inf          | #DIV/0! |
| C112268 | 0.09523809524 | 0.09523809524 | 0.05555555556 |  | 1.473684211  | #DIV/0! |
| C112543 | 0.1428571429  | 0.1428571429  | 0             |  | inf          | #DIV/0! |
| C112577 | 0.2380952381  | 0.2380952381  | 0.05555555556 |  | 4.375        | #DIV/0! |
| C112577 | 0.09523809524 | 0.09523809524 | 0             |  | inf          | #DIV/0! |
| C112694 | 0.04761904762 | 0.04761904762 | 0             |  | inf          | #DIV/0! |
| C114483 | 0.09523809524 | 0.09523809524 | 0.05555555556 |  | 1.473684211  | #DIV/0! |
| C114483 | 0.09523809524 | 0.09523809524 | 0.05555555556 |  | 1.473684211  | #DIV/0! |
| OC14360 | 0.04761904762 | 0.04761904762 | 0             |  | inf          | #DIV/0! |
| OC14569 | 0.04761904762 | 0.04761904762 | 0.05555555556 |  | 0.7          | #DIV/0! |
| OC14578 | 0.04761904762 | 0.04761904762 | 0.05555555556 |  | 0.7          | #DIV/0! |
| OC14584 | 0             | 0             | 0             |  |              | #DIV/0! |
| OC14869 | 0.1428571429  | 0.1428571429  | 0             |  | inf          | #DIV/0! |
| OC14870 | 0.1428571429  | 0.1428571429  | 0             |  | inf          | #DIV/0! |
| OC14937 | 0.1428571429  | 0.1428571429  | 0             |  | inf          | #DIV/0! |
| OC14968 | 0.1428571429  | 0.1428571429  | 0.1666666667  |  | 0.6666666667 | #DIV/0! |
| OC15005 | 0.04761904762 | 0.04761904762 | 0.1111111111  |  | 0.325        | #DIV/0! |
| OC15077 | 0             | 0             | 0.05555555556 |  | 0            | #DIV/0! |
| OC15093 | 0             | 0             | 0.05555555556 |  | 0            | #DIV/0! |
| OC15148 | 0             | 0             | 0.05555555556 |  | 0            | #DIV/0! |
| OC15204 | 0.04761904762 | 0.04761904762 | 0             |  | inf          | #DIV/0! |
| OC15368 | 0.04761904762 | 0.04761904762 | 0.05555555556 |  | 0.7          | #DIV/0! |
| OC15470 | 0.04761904762 | 0.04761904762 | 0             |  | inf          | #DIV/0! |
| OC15500 | 0.09523809524 | 0.09523809524 | 0.05555555556 |  | 1.473684211  | #DIV/0! |
| OC15727 | 0.09523809524 | 0.09523809524 | 0.1111111111  |  | 0.6842105263 | #DIV/0! |
| OC15843 | 0.04761904762 | 0.04761904762 | 0.05555555556 |  | 0.7          | #DIV/0! |
| OC15843 | 0.04761904762 | 0.04761904762 | 0.05555555556 |  | 0.7          | #DIV/0! |
| OC17139 | 0.04761904762 | 0.04761904762 | 0             |  | inf          | #DIV/0! |
| OC20077 | 0             | 0             | 0.05555555556 |  | 0            | #DIV/0! |

|         |               |               |               |  |              |         |
|---------|---------------|---------------|---------------|--|--------------|---------|
| OC20218 | 0.09523809524 | 0.09523809524 | 0.05555555556 |  | 1.473684211  | #DIV/0! |
| OC22072 | 0.1428571429  | 0.1428571429  | 0.05555555556 |  | 2.333333333  | #DIV/0! |
| OC22194 | 0.04761904762 | 0.04761904762 | 0.16666666667 |  | 0.2          | #DIV/0! |
| OC25489 | 0.04761904762 | 0.04761904762 | 0.11111111111 |  | 0.325        | #DIV/0! |
| OC25688 | 0             | 0             | 0.05555555556 |  | 0            | #DIV/0! |
| OC25739 | 0.04761904762 | 0.04761904762 | 0.05555555556 |  | 0.7          | #DIV/0! |
| OC28302 | 0.1428571429  | 0.1428571429  | 0.05555555556 |  | 2.333333333  | #DIV/0! |
| OC28303 | 0.2380952381  | 0.2380952381  | 0.05555555556 |  | 4.375        | #DIV/0! |
| OC28304 | 0.04761904762 | 0.04761904762 | 0.16666666667 |  | 0.2          | #DIV/0! |
| OC28329 | 0.04761904762 | 0.04761904762 | 0             |  | inf          | #DIV/0! |
| OC28333 | 0.04761904762 | 0.04761904762 | 0.05555555556 |  | 0.7          | #DIV/0! |
| OC28338 | 0.1428571429  | 0.1428571429  | 0.05555555556 |  | 2.333333333  | #DIV/0! |
| OC28343 | 0.09523809524 | 0.09523809524 | 0.05555555556 |  | 1.473684211  | #DIV/0! |
| OC28360 | 0.04761904762 | 0.04761904762 | 0.05555555556 |  | 0.7          | #DIV/0! |
| OC28368 | 0.09523809524 | 0.09523809524 | 0             |  | inf          | #DIV/0! |
| OC28373 | 0.04761904762 | 0.04761904762 | 0.05555555556 |  | 0.7          | #DIV/0! |
| OC28385 | 0.04761904762 | 0.04761904762 | 0             |  | inf          | #DIV/0! |
| OC28392 | 0.04761904762 | 0.04761904762 | 0             |  | inf          | #DIV/0! |
| OC28400 | 0             | 0             | 0.11111111111 |  | 0            | #DIV/0! |
| OC28419 | 0.04761904762 | 0.04761904762 | 0.05555555556 |  | 0.7          | #DIV/0! |
| OC28424 | 0.04761904762 | 0.04761904762 | 0.05555555556 |  | 0.7          | #DIV/0! |
| OC28424 | 0.04761904762 | 0.04761904762 | 0.05555555556 |  | 0.7          | #DIV/0! |
| OC28434 | 0.04761904762 | 0.04761904762 | 0.05555555556 |  | 0.7          | #DIV/0! |
| OC28437 | 0.09523809524 | 0.09523809524 | 0.05555555556 |  | 1.473684211  | #DIV/0! |
| OC28439 | 0.04761904762 | 0.04761904762 | 0.16666666667 |  | 0.2          | #DIV/0! |
| OC28441 | 0.04761904762 | 0.04761904762 | 0.05555555556 |  | 0.7          | #DIV/0! |
| OC28445 | 0.1428571429  | 0.1428571429  | 0.11111111111 |  | 1.083333333  | #DIV/0! |
| OC28457 | 0.1428571429  | 0.1428571429  | 0             |  | inf          | #DIV/0! |
| OC28458 | 0.1428571429  | 0.1428571429  | 0             |  | inf          | #DIV/0! |
| OC28463 | 0.04761904762 | 0.04761904762 | 0.11111111111 |  | 0.325        | #DIV/0! |
| OC28478 | 0.1904761905  | 0.1904761905  | 0.05555555556 |  | 3.294117647  | #DIV/0! |
| OC28479 | 0.1904761905  | 0.1904761905  | 0.05555555556 |  | 3.294117647  | #DIV/0! |
| OC28480 | 0.04761904762 | 0.04761904762 | 0.05555555556 |  | 0.7          | #DIV/0! |
| OC28489 | 0.04761904762 | 0.04761904762 | 0.05555555556 |  | 0.7          | #DIV/0! |
| OC28493 | 0.04761904762 | 0.04761904762 | 0.16666666667 |  | 0.2          | #DIV/0! |
| OC28493 | 0.04761904762 | 0.04761904762 | 0.16666666667 |  | 0.2          | #DIV/0! |
| OC28495 | 0             | 0             | 0.05555555556 |  | 0            | #DIV/0! |
| OC28500 | 0             | 0             | 0.05555555556 |  | 0            | #DIV/0! |
| OC28507 | 0             | 0             | 0.05555555556 |  | 0            | #DIV/0! |
| OC28509 | 0             | 0             | 0.05555555556 |  | 0            | #DIV/0! |
| OC28509 | 0             | 0             | 0.05555555556 |  | 0            | #DIV/0! |
| OC28519 | 0             | 0             | 0.05555555556 |  | 0            | #DIV/0! |
| OC28559 | 0             | 0             | 0.05555555556 |  | 0            | #DIV/0! |
| OC28562 | 0.04761904762 | 0.04761904762 | 0.05555555556 |  | 0.7          | #DIV/0! |
| OC28563 | 0.04761904762 | 0.04761904762 | 0             |  | inf          | #DIV/0! |
| OC28581 | 0             | 0             | 0.05555555556 |  | 0            | #DIV/0! |
| OC28584 | 0.04761904762 | 0.04761904762 | 0.05555555556 |  | 0.7          | #DIV/0! |
| OC28588 | 0.1428571429  | 0.1428571429  | 0.05555555556 |  | 2.333333333  | #DIV/0! |
| OC28605 | 0.04761904762 | 0.04761904762 | 0.11111111111 |  | 0.325        | #DIV/0! |
| OC28608 | 0.09523809524 | 0.09523809524 | 0.11111111111 |  | 0.6842105263 | #DIV/0! |
| OC28617 | 0.1428571429  | 0.1428571429  | 0.11111111111 |  | 1.083333333  | #DIV/0! |

|        |               |               |              |  |              |         |
|--------|---------------|---------------|--------------|--|--------------|---------|
| OC2861 | 0.1428571429  | 0.1428571429  | 0.1666666667 |  | 0.6666666667 | #DIV/0! |
| OC2862 | 0.1904761905  | 0.1904761905  | 0.2222222222 |  | 0.6470588235 | #DIV/0! |
| OC2863 | 0.04761904762 | 0.04761904762 | 0            |  | inf          | #DIV/0! |
| OC3389 | 0.04761904762 | 0.04761904762 | 0.0555555556 |  | 0.7          | #DIV/0! |
| OC3390 | 0.1904761905  | 0.1904761905  | 0            |  | inf          | #DIV/0! |
| OC3391 | 0             | 0             | 0.0555555556 |  | 0            | #DIV/0! |
| OC3391 | 0.1428571429  | 0.1428571429  | 0            |  | inf          | #DIV/0! |
| OC3392 | 0.09523809524 | 0.09523809524 | 0.0555555556 |  | 1.473684211  | #DIV/0! |
| OC3392 | 0.09523809524 | 0.09523809524 | 0.0555555556 |  | 1.473684211  | #DIV/0! |
| OC3395 | 0.1428571429  | 0.1428571429  | 0.0555555556 |  | 2.333333333  | #DIV/0! |
| OC3395 | 0.04761904762 | 0.04761904762 | 0.0555555556 |  | 0.7          | #DIV/0! |
| OC3395 | 0.1904761905  | 0.1904761905  | 0.1666666667 |  | 0.9411764706 | #DIV/0! |
| OC3396 | 0.04761904762 | 0.04761904762 | 0.1111111111 |  | 0.325        | #DIV/0! |
| OC3396 | 0.04761904762 | 0.04761904762 | 0.1666666667 |  | 0.2          | #DIV/0! |
| OC3398 | 0.09523809524 | 0.09523809524 | 0.0555555556 |  | 1.473684211  | #DIV/0! |
| OC3398 | 0.04761904762 | 0.04761904762 | 0            |  | inf          | #DIV/0! |
| OC3398 | 0.09523809524 | 0.09523809524 | 0.0555555556 |  | 1.473684211  | #DIV/0! |
| OC3399 | 0.04761904762 | 0.04761904762 | 0            |  | inf          | #DIV/0! |
| OC3399 | 0             | 0             | 0.0555555556 |  | 0            | #DIV/0! |
| OC3400 | 0             | 0             | 0.0555555556 |  | 0            | #DIV/0! |
| OC3403 | 0.09523809524 | 0.09523809524 | 0.1111111111 |  | 0.6842105263 | #DIV/0! |
| OC3405 | 0.04761904762 | 0.04761904762 | 0.0555555556 |  | 0.7          | #DIV/0! |
| OC3430 | 0.1904761905  | 0.1904761905  | 0.0555555556 |  | 3.294117647  | #DIV/0! |
| OC3449 | 0.1904761905  | 0.1904761905  | 0.0555555556 |  | 3.294117647  | #DIV/0! |
| OC3491 | 0.04761904762 | 0.04761904762 | 0.0555555556 |  | 0.7          | #DIV/0! |
| OC3744 | 0.04761904762 | 0.04761904762 | 0.1111111111 |  | 0.325        | #DIV/0! |
| OC3751 | 0             | 0             | 0.0555555556 |  | 0            | #DIV/0! |
| OC3882 | 0.04761904762 | 0.04761904762 | 0            |  | inf          | #DIV/0! |
| OC3882 | 0.04761904762 | 0.04761904762 | 0            |  | inf          | #DIV/0! |
| OC3884 | 0.04761904762 | 0.04761904762 | 0.1111111111 |  | 0.325        | #DIV/0! |
| OC3887 | 0.1904761905  | 0.1904761905  | 0.0555555556 |  | 3.294117647  | #DIV/0! |
| OC3888 | 0.04761904762 | 0.04761904762 | 0.1111111111 |  | 0.325        | #DIV/0! |
| OC3892 | 0             | 0             | 0.0555555556 |  | 0            | #DIV/0! |
| OC3896 | 0.1428571429  | 0.1428571429  | 0.0555555556 |  | 2.333333333  | #DIV/0! |
| OC3896 | 0.04761904762 | 0.04761904762 | 0.1111111111 |  | 0.325        | #DIV/0! |
| OC3897 | 0.04761904762 | 0.04761904762 | 0.0555555556 |  | 0.7          | #DIV/0! |
| OC3897 | 0             | 0             | 0.0555555556 |  | 0            | #DIV/0! |
| OC3907 | 0.1428571429  | 0.1428571429  | 0            |  | inf          | #DIV/0! |
| OC3908 | 0.1428571429  | 0.1428571429  | 0.0555555556 |  | 2.333333333  | #DIV/0! |
| OC3909 | 0.04761904762 | 0.04761904762 | 0.0555555556 |  | 0.7          | #DIV/0! |
| OC3913 | 0.04761904762 | 0.04761904762 | 0.1111111111 |  | 0.325        | #DIV/0! |
| OC3921 | 0.09523809524 | 0.09523809524 | 0.1111111111 |  | 0.6842105263 | #DIV/0! |
| OC3922 | 0.1904761905  | 0.1904761905  | 0.1666666667 |  | 0.9411764706 | #DIV/0! |
| OC3923 | 0             | 0             | 0.0555555556 |  | 0            | #DIV/0! |
| OC3998 | 0.2380952381  | 0.2380952381  | 0.0555555556 |  | 4.375        | #DIV/0! |
| OC4004 | 0.04761904762 | 0.04761904762 | 0.0555555556 |  | 0.7          | #DIV/0! |
| OC4005 | 0.1428571429  | 0.1428571429  | 0.0555555556 |  | 2.333333333  | #DIV/0! |
| OC4005 | 0.04761904762 | 0.04761904762 | 0            |  | inf          | #DIV/0! |
| OC4006 | 0.04761904762 | 0.04761904762 | 0            |  | inf          | #DIV/0! |
| OC4006 | 0.04761904762 | 0.04761904762 | 0            |  | inf          | #DIV/0! |
| OC4006 | 0.09523809524 | 0.09523809524 | 0            |  | inf          | #DIV/0! |

|         |               |               |               |  |              |         |
|---------|---------------|---------------|---------------|--|--------------|---------|
| OC40068 | 0.04761904762 | 0.04761904762 | 0.05555555556 |  | 0.7          | #DIV/0! |
| OC40070 | 0.09523809524 | 0.09523809524 | 0.11111111111 |  | 0.6842105263 | #DIV/0! |
| OC40074 | 0.04761904762 | 0.04761904762 | 0.11111111111 |  | 0.325        | #DIV/0! |
| OC40080 | 0.1428571429  | 0.1428571429  | 0.11111111111 |  | 1.083333333  | #DIV/0! |
| OC40080 | 0.04761904762 | 0.04761904762 | 0.11111111111 |  | 0.325        | #DIV/0! |
| OC40094 | 0             | 0             | 0.05555555556 |  | 0            | #DIV/0! |
| OC40112 | 0.1904761905  | 0.1904761905  | 0.05555555556 |  | 3.294117647  | #DIV/0! |
| OC40117 | 0.04761904762 | 0.04761904762 | 0.05555555556 |  | 0.7          | #DIV/0! |
| OC40120 | 0.04761904762 | 0.04761904762 | 0.05555555556 |  | 0.7          | #DIV/0! |
| OC40130 | 0.04761904762 | 0.04761904762 | 0.16666666667 |  | 0.2          | #DIV/0! |
| OC40132 | 0.04761904762 | 0.04761904762 | 0.22222222222 |  | 0.1375       | #DIV/0! |
| OC40135 | 0.1428571429  | 0.1428571429  | 0.16666666667 |  | 0.6666666667 | #DIV/0! |
| OC40144 | 0.09523809524 | 0.09523809524 | 0.11111111111 |  | 0.6842105263 | #DIV/0! |
| OC40146 | 0.1428571429  | 0.1428571429  | 0.16666666667 |  | 0.6666666667 | #DIV/0! |
| OC40147 | 0.04761904762 | 0.04761904762 | 0.11111111111 |  | 0.325        | #DIV/0! |
| OC40155 | 0.04761904762 | 0.04761904762 | 0             |  | inf          | #DIV/0! |
| OC40332 | 0.09523809524 | 0.09523809524 | 0.22222222222 |  | 0.2894736842 | #DIV/0! |
| OC40783 | 0.04761904762 | 0.04761904762 | 0.05555555556 |  | 0.7          | #DIV/0! |
| OC41430 | 0.04761904762 | 0.04761904762 | 0.05555555556 |  | 0.7          | #DIV/0! |
| OC44002 | 0.04761904762 | 0.04761904762 | 0.05555555556 |  | 0.7          | #DIV/0! |
| OC44008 | 0.04761904762 | 0.04761904762 | 0.11111111111 |  | 0.325        | #DIV/0! |
| OC44017 | 0             | 0             | 0.05555555556 |  | 0            | #DIV/0! |
| OC44029 | 0.04761904762 | 0.04761904762 | 0.05555555556 |  | 0.7          | #DIV/0! |
| OC44030 | 0.04761904762 | 0.04761904762 | 0.05555555556 |  | 0.7          | #DIV/0! |
| OC44031 | 0.04761904762 | 0.04761904762 | 0.05555555556 |  | 0.7          | #DIV/0! |
| OC44034 | 0.04761904762 | 0.04761904762 | 0             |  | inf          | #DIV/0! |
| OC44057 | 0.04761904762 | 0.04761904762 | 0.11111111111 |  | 0.325        | #DIV/0! |
| OC44070 | 0.1428571429  | 0.1428571429  | 0             |  | inf          | #DIV/0! |
| OC44089 | 0             | 0             | 0.05555555556 |  | 0            | #DIV/0! |
| OC44089 | 0.09523809524 | 0.09523809524 | 0.22222222222 |  | 0.2894736842 | #DIV/0! |
| OC44091 | 0             | 0             | 0.05555555556 |  | 0            | #DIV/0! |
| OC44098 | 0.1428571429  | 0.1428571429  | 0.11111111111 |  | 1.083333333  | #DIV/0! |
| OC44105 | 0             | 0             | 0.05555555556 |  | 0            | #DIV/0! |
| OC44108 | 0.09523809524 | 0.09523809524 | 0.16666666667 |  | 0.4210526316 | #DIV/0! |
| OC44108 | 0.04761904762 | 0.04761904762 | 0             |  | inf          | #DIV/0! |
| OC44108 | 0.04761904762 | 0.04761904762 | 0             |  | inf          | #DIV/0! |
| OC44120 | 0.04761904762 | 0.04761904762 | 0.22222222222 |  | 0.1375       | #DIV/0! |
| OC44124 | 0.04761904762 | 0.04761904762 | 0.11111111111 |  | 0.325        | #DIV/0! |
| OC44145 | 0.04761904762 | 0.04761904762 | 0             |  | inf          | #DIV/0! |
| OC44160 | 0.1428571429  | 0.1428571429  | 0.05555555556 |  | 2.333333333  | #DIV/0! |
| OC44202 | 0             | 0             | 0.11111111111 |  | 0            | #DIV/0! |
| OC44213 | 0             | 0             | 0.05555555556 |  | 0            | #DIV/0! |
| OC44249 | 0.04761904762 | 0.04761904762 | 0.16666666667 |  | 0.2          | #DIV/0! |
| OC49412 | 0             | 0             | 0.05555555556 |  | 0            | #DIV/0! |
| OC49725 | 0             | 0             | 0.05555555556 |  | 0            | #DIV/0! |
| OC51140 | 0.09523809524 | 0.09523809524 | 0.05555555556 |  | 1.473684211  | #DIV/0! |
| OC54147 | 0.04761904762 | 0.04761904762 | 0.16666666667 |  | 0.2          | #DIV/0! |
| OC54147 | 0.1428571429  | 0.1428571429  | 0.16666666667 |  | 0.6666666667 | #DIV/0! |
| OC55011 | 0.04761904762 | 0.04761904762 | 0.05555555556 |  | 0.7          | #DIV/0! |
| OC55420 | 0.04761904762 | 0.04761904762 | 0             |  | inf          | #DIV/0! |
| OC55424 | 0.1904761905  | 0.1904761905  | 0.05555555556 |  | 3.294117647  | #DIV/0! |

|         |               |               |               |  |              |         |
|---------|---------------|---------------|---------------|--|--------------|---------|
| OC57453 | 0.04761904762 | 0.04761904762 | 0.1111111111  |  | 0.325        | #DIV/0! |
| OC60672 | 0.04761904762 | 0.04761904762 | 0             |  | inf          | #DIV/0! |
| OC61303 | 0.04761904762 | 0.04761904762 | 0             |  | inf          | #DIV/0! |
| OC61320 | 0.09523809524 | 0.09523809524 | 0.05555555556 |  | 1.473684211  | #DIV/0! |
| OC61326 | 0.1904761905  | 0.1904761905  | 0.1111111111  |  | 1.529411765  | #DIV/0! |
| OC64130 | 0.09523809524 | 0.09523809524 | 0             |  | inf          | #DIV/0! |
| OC64174 | 0.04761904762 | 0.04761904762 | 0.05555555556 |  | 0.7          | #DIV/0! |
| OC64213 | 0.2380952381  | 0.2380952381  | 0.1111111111  |  | 2.03125      | #DIV/0! |
| OC64230 | 0.1428571429  | 0.1428571429  | 0             |  | inf          | #DIV/0! |
| OC64230 | 0.04761904762 | 0.04761904762 | 0.05555555556 |  | 0.7          | #DIV/0! |
| OC64248 | 0.09523809524 | 0.09523809524 | 0             |  | inf          | #DIV/0! |
| OC64264 | 0             | 0             | 0.1111111111  |  | 0            | #DIV/0! |
| OC64284 | 0.04761904762 | 0.04761904762 | 0.1111111111  |  | 0.325        | #DIV/0! |
| OC64292 | 0.1904761905  | 0.1904761905  | 0.05555555556 |  | 3.294117647  | #DIV/0! |
| OC64294 | 0.04761904762 | 0.04761904762 | 0.05555555556 |  | 0.7          | #DIV/0! |
| OC64307 | 0             | 0             | 0.05555555556 |  | 0            | #DIV/0! |
| OC64320 | 0.09523809524 | 0.09523809524 | 0.05555555556 |  | 1.473684211  | #DIV/0! |
| OC64333 | 0.04761904762 | 0.04761904762 | 0.05555555556 |  | 0.7          | #DIV/0! |
| OC64338 | 0             | 0             | 0.05555555556 |  | 0            | #DIV/0! |
| OC64340 | 0.1904761905  | 0.1904761905  | 0.05555555556 |  | 3.294117647  | #DIV/0! |
| OC64344 | 0.04761904762 | 0.04761904762 | 0.05555555556 |  | 0.7          | #DIV/0! |
| OC64371 | 0.1904761905  | 0.1904761905  | 0.05555555556 |  | 3.294117647  | #DIV/0! |
| OC64380 | 0.04761904762 | 0.04761904762 | 0.05555555556 |  | 0.7          | #DIV/0! |
| OC64409 | 0.09523809524 | 0.09523809524 | 0.05555555556 |  | 1.473684211  | #DIV/0! |
| OC64418 | 0.04761904762 | 0.04761904762 | 0.05555555556 |  | 0.7          | #DIV/0! |
| OC64421 | 0.1428571429  | 0.1428571429  | 0             |  | inf          | #DIV/0! |
| OC64428 | 0.04761904762 | 0.04761904762 | 0             |  | inf          | #DIV/0! |
| OC64455 | 0.04761904762 | 0.04761904762 | 0.05555555556 |  | 0.7          | #DIV/0! |
| OC64463 | 0.09523809524 | 0.09523809524 | 0.05555555556 |  | 1.473684211  | #DIV/0! |
| OC64465 | 0.04761904762 | 0.04761904762 | 0.05555555556 |  | 0.7          | #DIV/0! |
| OC64460 | 0.09523809524 | 0.09523809524 | 0.05555555556 |  | 1.473684211  | #DIV/0! |
| OC64493 | 0.04761904762 | 0.04761904762 | 0             |  | inf          | #DIV/0! |
| OC64517 | 0.04761904762 | 0.04761904762 | 0.05555555556 |  | 0.7          | #DIV/0! |
| OC64548 | 0.04761904762 | 0.04761904762 | 0.05555555556 |  | 0.7          | #DIV/0! |
| OC64551 | 0             | 0             | 0.05555555556 |  | 0            | #DIV/0! |
| OC64575 | 0.04761904762 | 0.04761904762 | 0.05555555556 |  | 0.7          | #DIV/0! |
| OC64590 | 0             | 0             | 0             |  |              | #DIV/0! |
| OC64603 | 0             | 0             | 0             |  |              | #DIV/0! |
| OC64621 | 0.2857142857  | 0.2857142857  | 0.1111111111  |  | 2.6          | #DIV/0! |
| OC64647 | 0.04761904762 | 0.04761904762 | 0.1111111111  |  | 0.325        | #DIV/0! |
| OC64658 | 0.04761904762 | 0.04761904762 | 0.2222222222  |  | 0.1375       | #DIV/0! |
| OC64662 | 0.04761904762 | 0.04761904762 | 0.05555555556 |  | 0.7          | #DIV/0! |
| OC64665 | 0.04761904762 | 0.04761904762 | 0.1111111111  |  | 0.325        | #DIV/0! |
| OC64673 | 0             | 0             | 0.05555555556 |  | 0            | #DIV/0! |
| OC64670 | 0.04761904762 | 0.04761904762 | 0.1666666667  |  | 0.2          | #DIV/0! |
| OC64690 | 0.1904761905  | 0.1904761905  | 0.1111111111  |  | 1.529411765  | #DIV/0! |
| OC64693 | 0.04761904762 | 0.04761904762 | 0.05555555556 |  | 0.7          | #DIV/0! |
| OC64707 | 0.1428571429  | 0.1428571429  | 0             |  | inf          | #DIV/0! |
| OC64898 | 0.04761904762 | 0.04761904762 | 0.05555555556 |  | 0.7          | #DIV/0! |
| OC64935 | 0.09523809524 | 0.09523809524 | 0.1111111111  |  | 0.6842105263 | #DIV/0! |
| OC65022 | 0.1428571429  | 0.1428571429  | 0.1666666667  |  | 0.6666666667 | #DIV/0! |

|         |               |               |              |  |              |         |
|---------|---------------|---------------|--------------|--|--------------|---------|
| OC65133 | 0.09523809524 | 0.09523809524 | 0            |  | inf          | #DIV/0! |
| OC65227 | 0.04761904762 | 0.04761904762 | 0.1111111111 |  | 0.325        | #DIV/0! |
| OC65308 | 0.09523809524 | 0.09523809524 | 0.1666666667 |  | 0.4210526316 | #DIV/0! |
| OC65310 | 0.04761904762 | 0.04761904762 | 0.0555555556 |  | 0.7          | #DIV/0! |
| OC65351 | 0.09523809524 | 0.09523809524 | 0.0555555556 |  | 1.473684211  | #DIV/0! |
| OC65365 | 0.1428571429  | 0.1428571429  | 0            |  | inf          | #DIV/0! |
| OC65371 | 0.09523809524 | 0.09523809524 | 0.0555555556 |  | 1.473684211  | #DIV/0! |
| OC65478 | 0.04761904762 | 0.04761904762 | 0            |  | inf          | #DIV/0! |
| OC65484 | 0             | 0             | 0.0555555556 |  | 0            | #DIV/0! |
| OC69224 | 0.04761904762 | 0.04761904762 | 0            |  | inf          | #DIV/0! |
| OC72775 | 0.04761904762 | 0.04761904762 | 0.0555555556 |  | 0.7          | #DIV/0! |
| OC72789 | 0.09523809524 | 0.09523809524 | 0            |  | inf          | #DIV/0! |
| OC72802 | 0.04761904762 | 0.04761904762 | 0.1111111111 |  | 0.325        | #DIV/0! |
| OC72809 | 0             | 0             | 0.0555555556 |  | 0            | #DIV/0! |
| OC72815 | 0.2380952381  | 0.2380952381  | 0.0555555556 |  | 4.375        | #DIV/0! |
| OC72839 | 0             | 0             | 0.0555555556 |  | 0            | #DIV/0! |
| OC72848 | 0.04761904762 | 0.04761904762 | 0.0555555556 |  | 0.7          | #DIV/0! |
| OC72855 | 0.09523809524 | 0.09523809524 | 0.0555555556 |  | 1.473684211  | #DIV/0! |
| OC72861 | 0             | 0             | 0.1111111111 |  | 0            | #DIV/0! |
| OC72867 | 0.09523809524 | 0.09523809524 | 0.2222222222 |  | 0.2894736842 | #DIV/0! |
| OC72871 | 0.04761904762 | 0.04761904762 | 0.1111111111 |  | 0.325        | #DIV/0! |
| OC72873 | 0.04761904762 | 0.04761904762 | 0.0555555556 |  | 0.7          | #DIV/0! |
| OC72874 | 0.09523809524 | 0.09523809524 | 0.0555555556 |  | 1.473684211  | #DIV/0! |
| OC72875 | 0.04761904762 | 0.04761904762 | 0.0555555556 |  | 0.7          | #DIV/0! |
| OC72898 | 0.1428571429  | 0.1428571429  | 0.0555555556 |  | 2.333333333  | #DIV/0! |
| OC72908 | 0.04761904762 | 0.04761904762 | 0            |  | inf          | #DIV/0! |
| OC72921 | 0             | 0             | 0.0555555556 |  | 0            | #DIV/0! |
| OC72925 | 0             | 0             | 0.0555555556 |  | 0            | #DIV/0! |
| OC72929 | 0.04761904762 | 0.04761904762 | 0.0555555556 |  | 0.7          | #DIV/0! |
| OC72929 | 0.1428571429  | 0.1428571429  | 0.1666666667 |  | 0.6666666667 | #DIV/0! |
| OC72955 | 0             | 0             | 0.0555555556 |  | 0            | #DIV/0! |
| OC72965 | 0.09523809524 | 0.09523809524 | 0.2222222222 |  | 0.2894736842 | #DIV/0! |
| OC72968 | 0.04761904762 | 0.04761904762 | 0            |  | inf          | #DIV/0! |
| OC72973 | 0.09523809524 | 0.09523809524 | 0.1111111111 |  | 0.6842105263 | #DIV/0! |
| OC72973 | 0.04761904762 | 0.04761904762 | 0.1666666667 |  | 0.2          | #DIV/0! |
| OC72981 | 0.1428571429  | 0.1428571429  | 0.0555555556 |  | 2.333333333  | #DIV/0! |
| OC72986 | 0.1428571429  | 0.1428571429  | 0            |  | inf          | #DIV/0! |
| OC72987 | 0             | 0             | 0.0555555556 |  | 0            | #DIV/0! |
| OC72993 | 0.04761904762 | 0.04761904762 | 0.0555555556 |  | 0.7          | #DIV/0! |
| OC72996 | 0.1428571429  | 0.1428571429  | 0.1111111111 |  | 1.083333333  | #DIV/0! |
| OC72996 | 0             | 0             | 0.0555555556 |  | 0            | #DIV/0! |
| OC72997 | 0.04761904762 | 0.04761904762 | 0.0555555556 |  | 0.7          | #DIV/0! |
| OC73009 | 0.09523809524 | 0.09523809524 | 0.0555555556 |  | 1.473684211  | #DIV/0! |
| OC73010 | 0.04761904762 | 0.04761904762 | 0.0555555556 |  | 0.7          | #DIV/0! |
| OC73010 | 0.04761904762 | 0.04761904762 | 0            |  | inf          | #DIV/0! |
| OC73018 | 0.04761904762 | 0.04761904762 | 0            |  | inf          | #DIV/0! |
| OC73023 | 0.04761904762 | 0.04761904762 | 0.2222222222 |  | 0.1375       | #DIV/0! |
| OC73026 | 0             | 0             | 0.0555555556 |  | 0            | #DIV/0! |
| OC73033 | 0.04761904762 | 0.04761904762 | 0.2222222222 |  | 0.1375       | #DIV/0! |
| OC73066 | 0             | 0             | 0.1111111111 |  | 0            | #DIV/0! |
| OC73115 | 0.04761904762 | 0.04761904762 | 0            |  | inf          | #DIV/0! |



|          |               |               |               |  |              |         |
|----------|---------------|---------------|---------------|--|--------------|---------|
| OC73220  | 0.04761904762 | 0.04761904762 | 0.05555555556 |  | 0.7          | #DIV/0! |
| OC79990  | 0.04761904762 | 0.04761904762 | 0.11111111111 |  | 0.325        | #DIV/0! |
| OC90240  | 0.09523809524 | 0.09523809524 | 0.05555555556 |  | 1.473684211  | #DIV/0! |
| OC91370  | 0.04761904762 | 0.04761904762 | 0.11111111111 |  | 0.325        | #DIV/0! |
| OC91450  | 0.04761904762 | 0.04761904762 | 0.05555555556 |  | 0.7          | #DIV/0! |
| OC91540  | 0.1428571429  | 0.1428571429  | 0             |  | inf          | #DIV/0! |
| OC93420  | 0.09523809524 | 0.09523809524 | 0.11111111111 |  | 0.6842105263 | #DIV/0! |
| OC93460  | 0             | 0             | 0.05555555556 |  | 0            | #DIV/0! |
| OH12CF0  | 0.04761904762 | 0.04761904762 | 0.05555555556 |  | 0.7          | #DIV/0! |
| LONP10   | 0.1428571429  | 0.1428571429  | 0.05555555556 |  | 2.333333333  | #DIV/0! |
| LONP20   | 0.04761904762 | 0.04761904762 | 0             |  | inf          | #DIV/0! |
| LONRF10  | 0.09523809524 | 0.09523809524 | 0.11111111111 |  | 0.6842105263 | #DIV/0! |
| LONRF20  | 0             | 0             | 0.05555555556 |  | 0            | #DIV/0! |
| LOX0     | 0.04761904762 | 0.04761904762 | 0             |  | inf          | #DIV/0! |
| LOXHD0   | 0.04761904762 | 0.04761904762 | 0.05555555556 |  | 0.7          | #DIV/0! |
| LOXL10   | 0.04761904762 | 0.04761904762 | 0.05555555556 |  | 0.7          | #DIV/0! |
| LOXL1-A0 | 0.04761904762 | 0.04761904762 | 0.05555555556 |  | 0.7          | #DIV/0! |
| LOXL20   | 0.04761904762 | 0.04761904762 | 0.11111111111 |  | 0.325        | #DIV/0! |
| LOXL30   | 0             | 0             | 0.05555555556 |  | 0            | #DIV/0! |
| LOXL40   | 0.1428571429  | 0.1428571429  | 0             |  | inf          | #DIV/0! |
| LPAR10   | 0.04761904762 | 0.04761904762 | 0.05555555556 |  | 0.7          | #DIV/0! |
| LPAR20   | 0.1428571429  | 0.1428571429  | 0.11111111111 |  | 1.083333333  | #DIV/0! |
| LPAR30   | 0.04761904762 | 0.04761904762 | 0.05555555556 |  | 0.7          | #DIV/0! |
| LPAR50   | 0.04761904762 | 0.04761904762 | 0.11111111111 |  | 0.325        | #DIV/0! |
| LPCAT10  | 0             | 0             | 0.11111111111 |  | 0            | #DIV/0! |
| LPCAT20  | 0.04761904762 | 0.04761904762 | 0             |  | inf          | #DIV/0! |
| LPCAT30  | 0.04761904762 | 0.04761904762 | 0.11111111111 |  | 0.325        | #DIV/0! |
| LPGAT10  | 0.1428571429  | 0.1428571429  | 0             |  | inf          | #DIV/0! |
| GAT1-A0  | 0.1428571429  | 0.1428571429  | 0             |  | inf          | #DIV/0! |
| LPIN10   | 0             | 0             | 0.05555555556 |  | 0            | #DIV/0! |
| LPIN20   | 0.09523809524 | 0.09523809524 | 0             |  | inf          | #DIV/0! |
| LPIN30   | 0.1428571429  | 0.1428571429  | 0.16666666667 |  | 0.6666666667 | #DIV/0! |
| LPL0     | 0.09523809524 | 0.09523809524 | 0.11111111111 |  | 0.6842105263 | #DIV/0! |
| LPO0     | 0.09523809524 | 0.09523809524 | 0             |  | inf          | #DIV/0! |
| LPP0     | 0.09523809524 | 0.09523809524 | 0.11111111111 |  | 0.6842105263 | #DIV/0! |
| LPP-AS10 | 0.09523809524 | 0.09523809524 | 0.11111111111 |  | 0.6842105263 | #DIV/0! |
| LPP-AS20 | 0.09523809524 | 0.09523809524 | 0.11111111111 |  | 0.6842105263 | #DIV/0! |
| LRAT0    | 0             | 0             | 0.05555555556 |  | 0            | #DIV/0! |
| LRATD10  | 0             | 0             | 0.05555555556 |  | 0            | #DIV/0! |
| LRATD20  | 0.1428571429  | 0.1428571429  | 0.11111111111 |  | 1.083333333  | #DIV/0! |
| LRBA0    | 0             | 0             | 0.05555555556 |  | 0            | #DIV/0! |
| LRCH30   | 0.1428571429  | 0.1428571429  | 0.05555555556 |  | 2.333333333  | #DIV/0! |
| LRCH40   | 0.04761904762 | 0.04761904762 | 0.05555555556 |  | 0.7          | #DIV/0! |
| RCOLI0   | 0.09523809524 | 0.09523809524 | 0.05555555556 |  | 1.473684211  | #DIV/0! |
| LRFN10   | 0.04761904762 | 0.04761904762 | 0.05555555556 |  | 0.7          | #DIV/0! |
| LRFN20   | 0             | 0             | 0.05555555556 |  | 0            | #DIV/0! |
| LRFN30   | 0.04761904762 | 0.04761904762 | 0.05555555556 |  | 0.7          | #DIV/0! |
| LRFN50   | 0.04761904762 | 0.04761904762 | 0             |  | inf          | #DIV/0! |
| LRG10    | 0.09523809524 | 0.09523809524 | 0.05555555556 |  | 1.473684211  | #DIV/0! |
| LRGUK0   | 0.04761904762 | 0.04761904762 | 0.05555555556 |  | 0.7          | #DIV/0! |
| LRIF10   | 0.04761904762 | 0.04761904762 | 0             |  | inf          | #DIV/0! |

|          |               |               |               |  |              |         |
|----------|---------------|---------------|---------------|--|--------------|---------|
| LRIG1    | 0.04761904762 | 0.04761904762 | 0             |  | inf          | #DIV/0! |
| LRIG2    | 0.04761904762 | 0.04761904762 | 0.05555555556 |  | 0.7          | #DIV/0! |
| LRIG3    | 0.09523809524 | 0.09523809524 | 0             |  | inf          | #DIV/0! |
| LRIT1    | 0.1428571429  | 0.1428571429  | 0             |  | inf          | #DIV/0! |
| LRIT2    | 0.1428571429  | 0.1428571429  | 0             |  | inf          | #DIV/0! |
| LRIT3    | 0             | 0             | 0.05555555556 |  | 0            | #DIV/0! |
| LRMDA    | 0.1904761905  | 0.1904761905  | 0.1111111111  |  | 1.529411765  | #DIV/0! |
| LRMP     | 0.04761904762 | 0.04761904762 | 0.05555555556 |  | 0.7          | #DIV/0! |
| LRP1     | 0.1428571429  | 0.1428571429  | 0.05555555556 |  | 2.333333333  | #DIV/0! |
| LRP1-AS  | 0.1428571429  | 0.1428571429  | 0.05555555556 |  | 2.333333333  | #DIV/0! |
| LRP10    | 0             | 0             | 0.05555555556 |  | 0            | #DIV/0! |
| LRP11    | 0             | 0             | 0             |  |              | #DIV/0! |
| LRP12    | 0.1904761905  | 0.1904761905  | 0.1111111111  |  | 1.529411765  | #DIV/0! |
| LRP1B    | 0             | 0             | 0.05555555556 |  | 0            | #DIV/0! |
| LRP2     | 0.04761904762 | 0.04761904762 | 0.05555555556 |  | 0.7          | #DIV/0! |
| LRP2BP   | 0             | 0             | 0.05555555556 |  | 0            | #DIV/0! |
| LRP3     | 0.04761904762 | 0.04761904762 | 0.05555555556 |  | 0.7          | #DIV/0! |
| LRP4     | 0             | 0             | 0.05555555556 |  | 0            | #DIV/0! |
| LRP4-AS  | 0             | 0             | 0.05555555556 |  | 0            | #DIV/0! |
| LRP6     | 0.04761904762 | 0.04761904762 | 0.05555555556 |  | 0.7          | #DIV/0! |
| LRP8     | 0.04761904762 | 0.04761904762 | 0.05555555556 |  | 0.7          | #DIV/0! |
| LRPAP1   | 0.04761904762 | 0.04761904762 | 0             |  | inf          | #DIV/0! |
| LRPPRC   | 0             | 0             | 0.05555555556 |  | 0            | #DIV/0! |
| LRR1     | 0.04761904762 | 0.04761904762 | 0             |  | inf          | #DIV/0! |
| LRRC1    | 0.04761904762 | 0.04761904762 | 0             |  | inf          | #DIV/0! |
| LRRC10   | 0.09523809524 | 0.09523809524 | 0.1111111111  |  | 0.6842105263 | #DIV/0! |
| LRRC14   | 0.04761904762 | 0.04761904762 | 0.1666666667  |  | 0.2          | #DIV/0! |
| LRRC14I  | 0             | 0             | 0.05555555556 |  | 0            | #DIV/0! |
| LRRC15   | 0.09523809524 | 0.09523809524 | 0.05555555556 |  | 1.473684211  | #DIV/0! |
| LRRC17   | 0.04761904762 | 0.04761904762 | 0.05555555556 |  | 0.7          | #DIV/0! |
| LRRC18   | 0.09523809524 | 0.09523809524 | 0.05555555556 |  | 1.473684211  | #DIV/0! |
| LRRC19   | 0.04761904762 | 0.04761904762 | 0.05555555556 |  | 0.7          | #DIV/0! |
| LRRC20   | 0.09523809524 | 0.09523809524 | 0             |  | inf          | #DIV/0! |
| LRRC23   | 0.04761904762 | 0.04761904762 | 0.1111111111  |  | 0.325        | #DIV/0! |
| LRRC24   | 0.04761904762 | 0.04761904762 | 0.1666666667  |  | 0.2          | #DIV/0! |
| LRRC25   | 0.1428571429  | 0.1428571429  | 0.1111111111  |  | 1.083333333  | #DIV/0! |
| LRRC26   | 0.1428571429  | 0.1428571429  | 0.05555555556 |  | 2.333333333  | #DIV/0! |
| LRRC27   | 0.2380952381  | 0.2380952381  | 0             |  | inf          | #DIV/0! |
| LRRC28   | 0.04761904762 | 0.04761904762 | 0.05555555556 |  | 0.7          | #DIV/0! |
| LRRC29   | 0.1428571429  | 0.1428571429  | 0.05555555556 |  | 2.333333333  | #DIV/0! |
| LRRC3    | 0.04761904762 | 0.04761904762 | 0.1111111111  |  | 0.325        | #DIV/0! |
| LRRC3-D  | 0.04761904762 | 0.04761904762 | 0.1111111111  |  | 0.325        | #DIV/0! |
| LRRC30   | 0.09523809524 | 0.09523809524 | 0             |  | inf          | #DIV/0! |
| LRRC31   | 0.1904761905  | 0.1904761905  | 0.05555555556 |  | 3.294117647  | #DIV/0! |
| LRRC34   | 0.1904761905  | 0.1904761905  | 0.05555555556 |  | 3.294117647  | #DIV/0! |
| LRRC36   | 0.1428571429  | 0.1428571429  | 0.05555555556 |  | 2.333333333  | #DIV/0! |
| LRRC37A  | 0.1428571429  | 0.1428571429  | 0             |  | inf          | #DIV/0! |
| LRRC37A1 | 0.09523809524 | 0.09523809524 | 0             |  | inf          | #DIV/0! |
| LRRC37A2 | 0.2380952381  | 0.2380952381  | 0             |  | inf          | #DIV/0! |
| LRRC37A3 | 0.04761904762 | 0.04761904762 | 0             |  | inf          | #DIV/0! |
| LRRC37A4 | 0.1428571429  | 0.1428571429  | 0             |  | inf          | #DIV/0! |

|         |               |               |               |  |              |         |
|---------|---------------|---------------|---------------|--|--------------|---------|
| RRC37A  | 0.04761904762 | 0.04761904762 | 0.05555555556 |  | 0.7          | #DIV/0! |
| RRC37A  | 0.09523809524 | 0.09523809524 | 0.11111111111 |  | 0.6842105263 | #DIV/0! |
| RRC37A  | 0.09523809524 | 0.09523809524 | 0             |  | inf          | #DIV/0! |
| LRR37I  | 0             | 0             | 0             |  |              | #DIV/0! |
| LRR38   | 0.04761904762 | 0.04761904762 | 0.11111111111 |  | 0.325        | #DIV/0! |
| LRR39   | 0.04761904762 | 0.04761904762 | 0.05555555556 |  | 0.7          | #DIV/0! |
| LRR3B   | 0.04761904762 | 0.04761904762 | 0             |  | inf          | #DIV/0! |
| LRR3C   | 0.09523809524 | 0.09523809524 | 0             |  | inf          | #DIV/0! |
| LRR4    | 0.04761904762 | 0.04761904762 | 0.05555555556 |  | 0.7          | #DIV/0! |
| LRR40   | 0.04761904762 | 0.04761904762 | 0.05555555556 |  | 0.7          | #DIV/0! |
| LRR41   | 0.04761904762 | 0.04761904762 | 0.05555555556 |  | 0.7          | #DIV/0! |
| LRR42   | 0.04761904762 | 0.04761904762 | 0.05555555556 |  | 0.7          | #DIV/0! |
| LRR43   | 0.04761904762 | 0.04761904762 | 0.11111111111 |  | 0.325        | #DIV/0! |
| LRR45   | 0.04761904762 | 0.04761904762 | 0             |  | inf          | #DIV/0! |
| LRR46   | 0.1428571429  | 0.1428571429  | 0             |  | inf          | #DIV/0! |
| LRR47   | 0             | 0             | 0.05555555556 |  | 0            | #DIV/0! |
| LRR49   | 0.04761904762 | 0.04761904762 | 0.05555555556 |  | 0.7          | #DIV/0! |
| LRR4B   | 0.09523809524 | 0.09523809524 | 0.11111111111 |  | 0.6842105263 | #DIV/0! |
| LRR52   | 0.1428571429  | 0.1428571429  | 0             |  | inf          | #DIV/0! |
| RRC52-A | 0.1428571429  | 0.1428571429  | 0             |  | inf          | #DIV/0! |
| LRR53   | 0.04761904762 | 0.04761904762 | 0.05555555556 |  | 0.7          | #DIV/0! |
| LRR56   | 0.04761904762 | 0.04761904762 | 0             |  | inf          | #DIV/0! |
| LRR58   | 0.09523809524 | 0.09523809524 | 0.05555555556 |  | 1.473684211  | #DIV/0! |
| LRR59   | 0.09523809524 | 0.09523809524 | 0             |  | inf          | #DIV/0! |
| LRR6    | 0.04761904762 | 0.04761904762 | 0.11111111111 |  | 0.325        | #DIV/0! |
| LRR61   | 0.09523809524 | 0.09523809524 | 0.05555555556 |  | 1.473684211  | #DIV/0! |
| LRR66   | 0.2380952381  | 0.2380952381  | 0.05555555556 |  | 4.375        | #DIV/0! |
| LRR69   | 0.1904761905  | 0.1904761905  | 0.11111111111 |  | 1.529411765  | #DIV/0! |
| LRR7    | 0.04761904762 | 0.04761904762 | 0.05555555556 |  | 0.7          | #DIV/0! |
| LRR70   | 0.04761904762 | 0.04761904762 | 0             |  | inf          | #DIV/0! |
| LRR71   | 0.1428571429  | 0.1428571429  | 0.05555555556 |  | 2.333333333  | #DIV/0! |
| LRR72   | 0.04761904762 | 0.04761904762 | 0.22222222222 |  | 0.1375       | #DIV/0! |
| LRR73   | 0.04761904762 | 0.04761904762 | 0.05555555556 |  | 0.7          | #DIV/0! |
| LRR74   | 0.04761904762 | 0.04761904762 | 0.05555555556 |  | 0.7          | #DIV/0! |
| LRR75   | 0.04761904762 | 0.04761904762 | 0.05555555556 |  | 0.7          | #DIV/0! |
| LRR75I  | 0.04761904762 | 0.04761904762 | 0.11111111111 |  | 0.325        | #DIV/0! |
| LRR77I  | 0.1428571429  | 0.1428571429  | 0.05555555556 |  | 2.333333333  | #DIV/0! |
| LRR8A   | 0.09523809524 | 0.09523809524 | 0.05555555556 |  | 1.473684211  | #DIV/0! |
| LRR8B   | 0.04761904762 | 0.04761904762 | 0.05555555556 |  | 0.7          | #DIV/0! |
| LRR8C   | 0.04761904762 | 0.04761904762 | 0.05555555556 |  | 0.7          | #DIV/0! |
| RRC8C-I | 0.04761904762 | 0.04761904762 | 0.05555555556 |  | 0.7          | #DIV/0! |
| LRR8D   | 0.04761904762 | 0.04761904762 | 0.05555555556 |  | 0.7          | #DIV/0! |
| LRR8E   | 0.1428571429  | 0.1428571429  | 0.05555555556 |  | 2.333333333  | #DIV/0! |
| LRRCC1  | 0.1428571429  | 0.1428571429  | 0.11111111111 |  | 1.083333333  | #DIV/0! |
| LRRD1   | 0.04761904762 | 0.04761904762 | 0.11111111111 |  | 0.325        | #DIV/0! |
| LRRFIP  | 0             | 0             | 0.05555555556 |  | 0            | #DIV/0! |
| LRRFIP  | 0.04761904762 | 0.04761904762 | 0             |  | inf          | #DIV/0! |
| LRRIQ1  | 0.04761904762 | 0.04761904762 | 0.05555555556 |  | 0.7          | #DIV/0! |
| LRRIQ3  | 0.04761904762 | 0.04761904762 | 0.05555555556 |  | 0.7          | #DIV/0! |
| LRRIQ4  | 0.1904761905  | 0.1904761905  | 0.05555555556 |  | 3.294117647  | #DIV/0! |
| LRRK1   | 0.04761904762 | 0.04761904762 | 0.05555555556 |  | 0.7          | #DIV/0! |

|        |               |               |               |  |              |         |
|--------|---------------|---------------|---------------|--|--------------|---------|
| LRRK2  | 0.04761904762 | 0.04761904762 | 0.05555555556 |  | 0.7          | #DIV/0! |
| LRRN1  | 0.04761904762 | 0.04761904762 | 0             |  | inf          | #DIV/0! |
| LRRN2  | 0.2380952381  | 0.2380952381  | 0             |  | inf          | #DIV/0! |
| LRRN3  | 0.04761904762 | 0.04761904762 | 0.05555555556 |  | 0.7          | #DIV/0! |
| LRRN4  | 0.1904761905  | 0.1904761905  | 0.05555555556 |  | 3.294117647  | #DIV/0! |
| LRTM1  | 0             | 0             | 0.05555555556 |  | 0            | #DIV/0! |
| LRTM2  | 0.04761904762 | 0.04761904762 | 0             |  | inf          | #DIV/0! |
| LRTM3  | 0.1428571429  | 0.1428571429  | 0             |  | inf          | #DIV/0! |
| LRTM4  | 0             | 0             | 0.05555555556 |  | 0            | #DIV/0! |
| LSAM1  | 0.09523809524 | 0.09523809524 | 0.05555555556 |  | 1.473684211  | #DIV/0! |
| LRTM1  | 0.04761904762 | 0.04761904762 | 0             |  | inf          | #DIV/0! |
| LRTM2  | 0.04761904762 | 0.04761904762 | 0.16666666667 |  | 0.2          | #DIV/0! |
| LRWD1  | 0.04761904762 | 0.04761904762 | 0.05555555556 |  | 0.7          | #DIV/0! |
| LSAMP  | 0.09523809524 | 0.09523809524 | 0.05555555556 |  | 1.473684211  | #DIV/0! |
| SAMP-A | 0.09523809524 | 0.09523809524 | 0.05555555556 |  | 1.473684211  | #DIV/0! |
| LSG1   | 0.09523809524 | 0.09523809524 | 0.05555555556 |  | 1.473684211  | #DIV/0! |
| SINCT3 | 0             | 0             | 0.1111111111  |  | 0            | #DIV/0! |
| LSM1   | 0.09523809524 | 0.09523809524 | 0.1111111111  |  | 0.6842105263 | #DIV/0! |
| LSM10  | 0.04761904762 | 0.04761904762 | 0.05555555556 |  | 0.7          | #DIV/0! |
| LSM11  | 0.04761904762 | 0.04761904762 | 0.05555555556 |  | 0.7          | #DIV/0! |
| LSM12  | 0.09523809524 | 0.09523809524 | 0             |  | inf          | #DIV/0! |
| LSM14A | 0.04761904762 | 0.04761904762 | 0.05555555556 |  | 0.7          | #DIV/0! |
| LSM14B | 0.1428571429  | 0.1428571429  | 0.2222222222  |  | 0.4583333333 | #DIV/0! |
| LSM2   | 0.04761904762 | 0.04761904762 | 0             |  | inf          | #DIV/0! |
| LSM3   | 0.04761904762 | 0.04761904762 | 0             |  | inf          | #DIV/0! |
| LSM4   | 0.1428571429  | 0.1428571429  | 0.1111111111  |  | 1.083333333  | #DIV/0! |
| LSM5   | 0.04761904762 | 0.04761904762 | 0.16666666667 |  | 0.2          | #DIV/0! |
| LSM6   | 0             | 0             | 0.05555555556 |  | 0            | #DIV/0! |
| LSM7   | 0.09523809524 | 0.09523809524 | 0.1111111111  |  | 0.6842105263 | #DIV/0! |
| LSM8   | 0.09523809524 | 0.09523809524 | 0.05555555556 |  | 1.473684211  | #DIV/0! |
| SMEM1  | 0.04761904762 | 0.04761904762 | 0.05555555556 |  | 0.7          | #DIV/0! |
| SMEM2  | 0.09523809524 | 0.09523809524 | 0             |  | inf          | #DIV/0! |
| LSP1   | 0.04761904762 | 0.04761904762 | 0             |  | inf          | #DIV/0! |
| LSP1P3 | 0.04761904762 | 0.04761904762 | 0.05555555556 |  | 0.7          | #DIV/0! |
| LSP1P4 | 0.04761904762 | 0.04761904762 | 0.05555555556 |  | 0.7          | #DIV/0! |
| LSP1P5 | 0.1428571429  | 0.1428571429  | 0.05555555556 |  | 2.333333333  | #DIV/0! |
| LSR    | 0.04761904762 | 0.04761904762 | 0.05555555556 |  | 0.7          | #DIV/0! |
| LSS    | 0.04761904762 | 0.04761904762 | 0.1111111111  |  | 0.325        | #DIV/0! |
| LST1   | 0.04761904762 | 0.04761904762 | 0             |  | inf          | #DIV/0! |
| LTA    | 0.04761904762 | 0.04761904762 | 0             |  | inf          | #DIV/0! |
| LTA4H  | 0.04761904762 | 0.04761904762 | 0.05555555556 |  | 0.7          | #DIV/0! |
| LTB    | 0.04761904762 | 0.04761904762 | 0             |  | inf          | #DIV/0! |
| LTBP4  | 0.04761904762 | 0.04761904762 | 0.05555555556 |  | 0.7          | #DIV/0! |
| LTBR   | 0.04761904762 | 0.04761904762 | 0.1111111111  |  | 0.325        | #DIV/0! |
| LTC4S  | 0.09523809524 | 0.09523809524 | 0.05555555556 |  | 1.473684211  | #DIV/0! |
| LTN1   | 0.04761904762 | 0.04761904762 | 0.1111111111  |  | 0.325        | #DIV/0! |
| LUARIS | 0.04761904762 | 0.04761904762 | 0.16666666667 |  | 0.2          | #DIV/0! |
| LUC7L  | 0.04761904762 | 0.04761904762 | 0.2222222222  |  | 0.1375       | #DIV/0! |
| LUC7L2 | 0.04761904762 | 0.04761904762 | 0.05555555556 |  | 0.7          | #DIV/0! |
| LUC7L3 | 0.09523809524 | 0.09523809524 | 0             |  | inf          | #DIV/0! |
| LUCAT1 | 0.04761904762 | 0.04761904762 | 0             |  | inf          | #DIV/0! |

|         |               |               |               |  |             |         |
|---------|---------------|---------------|---------------|--|-------------|---------|
| LUM     | 0.04761904762 | 0.04761904762 | 0.05555555556 |  | 0.7         | #DIV/0! |
| LUNARI  | 0.04761904762 | 0.04761904762 | 0.05555555556 |  | 0.7         | #DIV/0! |
| LURAPI  | 0.04761904762 | 0.04761904762 | 0.05555555556 |  | 0.7         | #DIV/0! |
| URAPI   | 0.09523809524 | 0.09523809524 | 0.05555555556 |  | 1.473684211 | #DIV/0! |
| RAPIL-  | 0.09523809524 | 0.09523809524 | 0.05555555556 |  | 1.473684211 | #DIV/0! |
| LUZP1   | 0.04761904762 | 0.04761904762 | 0.11111111111 |  | 0.325       | #DIV/0! |
| LUZP6   | 0.04761904762 | 0.04761904762 | 0.05555555556 |  | 0.7         | #DIV/0! |
| LVRN    | 0.04761904762 | 0.04761904762 | 0             |  | inf         | #DIV/0! |
| LXN     | 0.1428571429  | 0.1428571429  | 0.05555555556 |  | 2.333333333 | #DIV/0! |
| LY6D    | 0.04761904762 | 0.04761904762 | 0.16666666667 |  | 0.2         | #DIV/0! |
| LY6E    | 0.04761904762 | 0.04761904762 | 0.16666666667 |  | 0.2         | #DIV/0! |
| Y6E-DT  | 0.04761904762 | 0.04761904762 | 0.16666666667 |  | 0.2         | #DIV/0! |
| LY6G5B  | 0.04761904762 | 0.04761904762 | 0             |  | inf         | #DIV/0! |
| LY6G5C  | 0.04761904762 | 0.04761904762 | 0             |  | inf         | #DIV/0! |
| LY6G6C  | 0.04761904762 | 0.04761904762 | 0             |  | inf         | #DIV/0! |
| LY6G6D  | 0.04761904762 | 0.04761904762 | 0             |  | inf         | #DIV/0! |
| LY6G6E  | 0.04761904762 | 0.04761904762 | 0             |  | inf         | #DIV/0! |
| LY6G6F  | 0.04761904762 | 0.04761904762 | 0             |  | inf         | #DIV/0! |
| G6F-LY6 | 0.04761904762 | 0.04761904762 | 0             |  | inf         | #DIV/0! |
| LY6H    | 0.04761904762 | 0.04761904762 | 0.16666666667 |  | 0.2         | #DIV/0! |
| LY6K    | 0.04761904762 | 0.04761904762 | 0.16666666667 |  | 0.2         | #DIV/0! |
| LY6L    | 0.04761904762 | 0.04761904762 | 0.16666666667 |  | 0.2         | #DIV/0! |
| LY75    | 0             | 0             | 0.05555555556 |  | 0           | #DIV/0! |
| 75-CD3  | 0             | 0             | 0.05555555556 |  | 0           | #DIV/0! |
| LY9     | 0.1428571429  | 0.1428571429  | 0             |  | inf         | #DIV/0! |
| LY96    | 0.1904761905  | 0.1904761905  | 0.11111111111 |  | 1.529411765 | #DIV/0! |
| LYG1    | 0             | 0             | 0.05555555556 |  | 0           | #DIV/0! |
| LYG2    | 0             | 0             | 0.05555555556 |  | 0           | #DIV/0! |
| LYL1    | 0.1428571429  | 0.1428571429  | 0.11111111111 |  | 1.083333333 | #DIV/0! |
| LYN     | 0.1428571429  | 0.1428571429  | 0.11111111111 |  | 1.083333333 | #DIV/0! |
| LYNX1   | 0.04761904762 | 0.04761904762 | 0.16666666667 |  | 0.2         | #DIV/0! |
| X1-SLU  | 0.04761904762 | 0.04761904762 | 0.16666666667 |  | 0.2         | #DIV/0! |
| LYPD1   | 0             | 0             | 0.05555555556 |  | 0           | #DIV/0! |
| LYPD2   | 0.04761904762 | 0.04761904762 | 0.16666666667 |  | 0.2         | #DIV/0! |
| LYPD3   | 0.09523809524 | 0.09523809524 | 0.05555555556 |  | 1.473684211 | #DIV/0! |
| LYPD4   | 0.04761904762 | 0.04761904762 | 0.05555555556 |  | 0.7         | #DIV/0! |
| LYPD5   | 0.09523809524 | 0.09523809524 | 0.05555555556 |  | 1.473684211 | #DIV/0! |
| LYPD6   | 0             | 0             | 0.05555555556 |  | 0           | #DIV/0! |
| LYPD6B  | 0             | 0             | 0.05555555556 |  | 0           | #DIV/0! |
| LYPD8   | 0.1428571429  | 0.1428571429  | 0             |  | inf         | #DIV/0! |
| LYPLA1  | 0.1428571429  | 0.1428571429  | 0.11111111111 |  | 1.083333333 | #DIV/0! |
| LYPLA2  | 0.04761904762 | 0.04761904762 | 0.11111111111 |  | 0.325       | #DIV/0! |
| YPLA2F  | 0.1428571429  | 0.1428571429  | 0.05555555556 |  | 2.333333333 | #DIV/0! |
| YPLAL   | 0.1428571429  | 0.1428571429  | 0.05555555556 |  | 2.333333333 | #DIV/0! |
| PLAL1-  | 0.1428571429  | 0.1428571429  | 0.05555555556 |  | 2.333333333 | #DIV/0! |
| PLAL1-  | 0.1428571429  | 0.1428571429  | 0.05555555556 |  | 2.333333333 | #DIV/0! |
| LYRM1   | 0.04761904762 | 0.04761904762 | 0             |  | inf         | #DIV/0! |
| LYRM2   | 0             | 0             | 0             |  |             | #DIV/0! |
| LYRM7   | 0.04761904762 | 0.04761904762 | 0             |  | inf         | #DIV/0! |
| LYRM9   | 0.04761904762 | 0.04761904762 | 0.05555555556 |  | 0.7         | #DIV/0! |
| LYSMD1  | 0.1904761905  | 0.1904761905  | 0.05555555556 |  | 3.294117647 | #DIV/0! |

|         |               |               |               |  |              |         |
|---------|---------------|---------------|---------------|--|--------------|---------|
| LYSMD2  | 0.04761904762 | 0.04761904762 | 0.05555555556 |  | 0.7          | #DIV/0! |
| LYSMD3  | 0.04761904762 | 0.04761904762 | 0             |  | inf          | #DIV/0! |
| LYSMD4  | 0.04761904762 | 0.04761904762 | 0.05555555556 |  | 0.7          | #DIV/0! |
| LYST    | 0.1428571429  | 0.1428571429  | 0.05555555556 |  | 2.333333333  | #DIV/0! |
| LYZ     | 0.09523809524 | 0.09523809524 | 0.1111111111  |  | 0.6842105263 | #DIV/0! |
| LYZL1   | 0.09523809524 | 0.09523809524 | 0.2222222222  |  | 0.2894736842 | #DIV/0! |
| LYZL2   | 0.09523809524 | 0.09523809524 | 0.2222222222  |  | 0.2894736842 | #DIV/0! |
| LYZL4   | 0.04761904762 | 0.04761904762 | 0             |  | inf          | #DIV/0! |
| LYZL6   | 0.09523809524 | 0.09523809524 | 0             |  | inf          | #DIV/0! |
| LZIC    | 0             | 0             | 0.1111111111  |  | 0            | #DIV/0! |
| LZTR1   | 0.04761904762 | 0.04761904762 | 0.05555555556 |  | 0.7          | #DIV/0! |
| LZTS1   | 0.09523809524 | 0.09523809524 | 0.1111111111  |  | 0.6842105263 | #DIV/0! |
| ZTS1-AS | 0.09523809524 | 0.09523809524 | 0.1111111111  |  | 0.6842105263 | #DIV/0! |
| LZTS2   | 0.1428571429  | 0.1428571429  | 0             |  | inf          | #DIV/0! |
| LZTS3   | 0.1904761905  | 0.1904761905  | 0.05555555556 |  | 3.294117647  | #DIV/0! |
| MIAP    | 0             | 0             | 0.05555555556 |  | 0            | #DIV/0! |
| M6PR    | 0.04761904762 | 0.04761904762 | 0.1111111111  |  | 0.325        | #DIV/0! |
| MAATS0  | 0.09523809524 | 0.09523809524 | 0.05555555556 |  | 1.473684211  | #DIV/0! |
| IAB2IL  | 0             | 0             | 0.05555555556 |  | 0            | #DIV/0! |
| IAB2IL0 | 0.04761904762 | 0.04761904762 | 0.05555555556 |  | 0.7          | #DIV/0! |
| IAB2IL  | 0             | 0             | 0.05555555556 |  | 0            | #DIV/0! |
| MACC1   | 0.04761904762 | 0.04761904762 | 0.2222222222  |  | 0.1375       | #DIV/0! |
| ACC1-A0 | 0.04761904762 | 0.04761904762 | 0.2222222222  |  | 0.1375       | #DIV/0! |
| MACF1   | 0.04761904762 | 0.04761904762 | 0.05555555556 |  | 0.7          | #DIV/0! |
| MACO1   | 0.04761904762 | 0.04761904762 | 0.1111111111  |  | 0.325        | #DIV/0! |
| ACROD   | 0.1904761905  | 0.1904761905  | 0.1111111111  |  | 1.529411765  | #DIV/0! |
| CROD2-  | 0.1904761905  | 0.1904761905  | 0.1111111111  |  | 1.529411765  | #DIV/0! |
| CROD2-  | 0.1904761905  | 0.1904761905  | 0.1111111111  |  | 1.529411765  | #DIV/0! |
| MAD1L1  | 0.04761904762 | 0.04761904762 | 0.1666666667  |  | 0.2          | #DIV/0! |
| MAD2L1  | 0             | 0             | 0.05555555556 |  | 0            | #DIV/0! |
| AD2L1B  | 0.04761904762 | 0.04761904762 | 0.05555555556 |  | 0.7          | #DIV/0! |
| MAD2L2  | 0.04761904762 | 0.04761904762 | 0.1111111111  |  | 0.325        | #DIV/0! |
| ADCAM0  | 0.09523809524 | 0.09523809524 | 0.1111111111  |  | 0.6842105263 | #DIV/0! |
| MADD    | 0             | 0             | 0.05555555556 |  | 0            | #DIV/0! |
| MAEA    | 0.04761904762 | 0.04761904762 | 0             |  | inf          | #DIV/0! |
| MAEL    | 0.1428571429  | 0.1428571429  | 0             |  | inf          | #DIV/0! |
| MAF     | 0.09523809524 | 0.09523809524 | 0             |  | inf          | #DIV/0! |
| MAF1    | 0.04761904762 | 0.04761904762 | 0.1666666667  |  | 0.2          | #DIV/0! |
| MAFA    | 0.04761904762 | 0.04761904762 | 0.05555555556 |  | 0.7          | #DIV/0! |
| IABA-AS | 0.04761904762 | 0.04761904762 | 0.05555555556 |  | 0.7          | #DIV/0! |
| MAFB    | 0.1428571429  | 0.1428571429  | 0.1666666667  |  | 0.6666666667 | #DIV/0! |
| MAFF    | 0.04761904762 | 0.04761904762 | 0.1111111111  |  | 0.325        | #DIV/0! |
| MAFG    | 0.04761904762 | 0.04761904762 | 0             |  | inf          | #DIV/0! |
| IAFG-D0 | 0.04761904762 | 0.04761904762 | 0             |  | inf          | #DIV/0! |
| MAFK    | 0.04761904762 | 0.04761904762 | 0.1666666667  |  | 0.2          | #DIV/0! |
| IAFTR1  | 0.09523809524 | 0.09523809524 | 0             |  | inf          | #DIV/0! |
| MAG     | 0.04761904762 | 0.04761904762 | 0.05555555556 |  | 0.7          | #DIV/0! |
| MAGEF   | 0.1428571429  | 0.1428571429  | 0.05555555556 |  | 2.333333333  | #DIV/0! |
| MAGI1   | 0.04761904762 | 0.04761904762 | 0             |  | inf          | #DIV/0! |
| AGI1-AS | 0.04761904762 | 0.04761904762 | 0             |  | inf          | #DIV/0! |
| AGI1-10 | 0.04761904762 | 0.04761904762 | 0             |  | inf          | #DIV/0! |

|         |               |               |               |  |              |         |
|---------|---------------|---------------|---------------|--|--------------|---------|
| MAGI2   | 0.04761904762 | 0.04761904762 | 0.1111111111  |  | 0.325        | #DIV/0! |
| AGI2-AS | 0.04761904762 | 0.04761904762 | 0.1111111111  |  | 0.325        | #DIV/0! |
| AGI2-AS | 0.04761904762 | 0.04761904762 | 0.1111111111  |  | 0.325        | #DIV/0! |
| MAGI3   | 0.04761904762 | 0.04761904762 | 0.05555555556 |  | 0.7          | #DIV/0! |
| MAGOH   | 0.04761904762 | 0.04761904762 | 0.05555555556 |  | 0.7          | #DIV/0! |
| AGOH2   | 0.04761904762 | 0.04761904762 | 0.05555555556 |  | 0.7          | #DIV/0! |
| IAGOH   | 0.04761904762 | 0.04761904762 | 0.1111111111  |  | 0.325        | #DIV/0! |
| MAIP1   | 0             | 0             | 0.05555555556 |  | 0            | #DIV/0! |
| MAK     | 0.04761904762 | 0.04761904762 | 0             |  | inf          | #DIV/0! |
| MAK16   | 0.04761904762 | 0.04761904762 | 0.1111111111  |  | 0.325        | #DIV/0! |
| MAL     | 0             | 0             | 0.1111111111  |  | 0            | #DIV/0! |
| MAL2    | 0.09523809524 | 0.09523809524 | 0.1666666667  |  | 0.4210526316 | #DIV/0! |
| IAL2-AS | 0.09523809524 | 0.09523809524 | 0.1666666667  |  | 0.4210526316 | #DIV/0! |
| IALINC  | 0.04761904762 | 0.04761904762 | 0             |  | inf          | #DIV/0! |
| MALL    | 0             | 0             | 0.05555555556 |  | 0            | #DIV/0! |
| IALRD   | 0.09523809524 | 0.09523809524 | 0.1111111111  |  | 0.6842105263 | #DIV/0! |
| MALSU   | 0.04761904762 | 0.04761904762 | 0.1666666667  |  | 0.2          | #DIV/0! |
| MALT1   | 0.09523809524 | 0.09523809524 | 0             |  | inf          | #DIV/0! |
| IAMDC   | 0             | 0             | 0.05555555556 |  | 0            | #DIV/0! |
| MDC2-A  | 0             | 0             | 0.05555555556 |  | 0            | #DIV/0! |
| IAMDC   | 0.1428571429  | 0.1428571429  | 0.05555555556 |  | 2.333333333  | #DIV/0! |
| MAML1   | 0.09523809524 | 0.09523809524 | 0.05555555556 |  | 1.473684211  | #DIV/0! |
| MAML3   | 0             | 0             | 0.05555555556 |  | 0            | #DIV/0! |
| IAMSTI  | 0.09523809524 | 0.09523809524 | 0.1111111111  |  | 0.6842105263 | #DIV/0! |
| MAN1A2  | 0.04761904762 | 0.04761904762 | 0.05555555556 |  | 0.7          | #DIV/0! |
| MAN1B1  | 0.1428571429  | 0.1428571429  | 0.05555555556 |  | 2.333333333  | #DIV/0! |
| AN1B1-I | 0.1428571429  | 0.1428571429  | 0.05555555556 |  | 2.333333333  | #DIV/0! |
| MAN1C   | 0.04761904762 | 0.04761904762 | 0.1111111111  |  | 0.325        | #DIV/0! |
| MAN2A   | 0.04761904762 | 0.04761904762 | 0             |  | inf          | #DIV/0! |
| MAN2A2  | 0.04761904762 | 0.04761904762 | 0.05555555556 |  | 0.7          | #DIV/0! |
| MAN2B1  | 0.1428571429  | 0.1428571429  | 0.1111111111  |  | 1.083333333  | #DIV/0! |
| MAN2C   | 0.04761904762 | 0.04761904762 | 0.05555555556 |  | 0.7          | #DIV/0! |
| MANBA   | 0             | 0             | 0.05555555556 |  | 0            | #DIV/0! |
| IANBA   | 0.09523809524 | 0.09523809524 | 0.1666666667  |  | 0.4210526316 | #DIV/0! |
| MANCR   | 0.04761904762 | 0.04761904762 | 0.1666666667  |  | 0.2          | #DIV/0! |
| IANEAI  | 0.04761904762 | 0.04761904762 | 0.05555555556 |  | 0.7          | #DIV/0! |
| MANF    | 0.04761904762 | 0.04761904762 | 0             |  | inf          | #DIV/0! |
| MANSC   | 0.04761904762 | 0.04761904762 | 0.05555555556 |  | 0.7          | #DIV/0! |
| MANSC4  | 0.04761904762 | 0.04761904762 | 0.05555555556 |  | 0.7          | #DIV/0! |
| MAP10   | 0.1428571429  | 0.1428571429  | 0             |  | inf          | #DIV/0! |
| MAP11   | 0.04761904762 | 0.04761904762 | 0.05555555556 |  | 0.7          | #DIV/0! |
| MAP1B   | 0             | 0             | 0.05555555556 |  | 0            | #DIV/0! |
| AP1LC3  | 0.09523809524 | 0.09523809524 | 0.1111111111  |  | 0.6842105263 | #DIV/0! |
| AP1LC3  | 0.04761904762 | 0.04761904762 | 0             |  | inf          | #DIV/0! |
| AP1LC3  | 0             | 0             | 0.05555555556 |  | 0            | #DIV/0! |
| AP1LC3  | 0.1428571429  | 0.1428571429  | 0             |  | inf          | #DIV/0! |
| MAP1S   | 0.1428571429  | 0.1428571429  | 0.1111111111  |  | 1.083333333  | #DIV/0! |
| MAP2    | 0             | 0             | 0.05555555556 |  | 0            | #DIV/0! |
| MAP2K1  | 0.04761904762 | 0.04761904762 | 0.05555555556 |  | 0.7          | #DIV/0! |
| MAP2K2  | 0.09523809524 | 0.09523809524 | 0.05555555556 |  | 1.473684211  | #DIV/0! |
| MAP2K3  | 0.09523809524 | 0.09523809524 | 0.05555555556 |  | 1.473684211  | #DIV/0! |

|         |               |               |               |  |              |         |
|---------|---------------|---------------|---------------|--|--------------|---------|
| MAP2K4  | 0.04761904762 | 0.04761904762 | 0.05555555556 |  | 0.7          | #DIV/0! |
| MAP2K5  | 0.04761904762 | 0.04761904762 | 0.05555555556 |  | 0.7          | #DIV/0! |
| MAP2K6  | 0             | 0             | 0             |  |              | #DIV/0! |
| MAP2K7  | 0.1428571429  | 0.1428571429  | 0.05555555556 |  | 2.333333333  | #DIV/0! |
| MAP3K10 | 0.04761904762 | 0.04761904762 | 0.05555555556 |  | 0.7          | #DIV/0! |
| IAP3K10 | 0.04761904762 | 0.04761904762 | 0.05555555556 |  | 0.7          | #DIV/0! |
| IAP3K11 | 0.04761904762 | 0.04761904762 | 0.05555555556 |  | 0.7          | #DIV/0! |
| IAP3K11 | 0.1428571429  | 0.1428571429  | 0.05555555556 |  | 2.333333333  | #DIV/0! |
| IAP3K11 | 0.1428571429  | 0.1428571429  | 0             |  | inf          | #DIV/0! |
| P3K14-A | 0.1428571429  | 0.1428571429  | 0             |  | inf          | #DIV/0! |
| IAP3K10 | 0.04761904762 | 0.04761904762 | 0.05555555556 |  | 0.7          | #DIV/0! |
| MAP3K2  | 0             | 0             | 0.05555555556 |  | 0            | #DIV/0! |
| IAP3K2  | 0             | 0             | 0.1111111111  |  | 0            | #DIV/0! |
| P3K20-A | 0             | 0             | 0.1111111111  |  | 0            | #DIV/0! |
| IAP3K2  | 0.1428571429  | 0.1428571429  | 0             |  | inf          | #DIV/0! |
| MAP3K3  | 0.04761904762 | 0.04761904762 | 0             |  | inf          | #DIV/0! |
| MAP3K6  | 0.04761904762 | 0.04761904762 | 0.1111111111  |  | 0.325        | #DIV/0! |
| MAP3K7  | 0             | 0             | 0             |  |              | #DIV/0! |
| AP3K7C  | 0.04761904762 | 0.04761904762 | 0.1111111111  |  | 0.325        | #DIV/0! |
| MAP3K8  | 0.09523809524 | 0.09523809524 | 0.2222222222  |  | 0.2894736842 | #DIV/0! |
| MAP4    | 0.09523809524 | 0.09523809524 | 0             |  | inf          | #DIV/0! |
| MAP4K10 | 0.04761904762 | 0.04761904762 | 0.05555555556 |  | 0.7          | #DIV/0! |
| MAP4K3  | 0             | 0             | 0.05555555556 |  | 0            | #DIV/0! |
| AP4K3-I | 0             | 0             | 0.05555555556 |  | 0            | #DIV/0! |
| MAP4K4  | 0             | 0             | 0.05555555556 |  | 0            | #DIV/0! |
| MAP4K5  | 0.04761904762 | 0.04761904762 | 0             |  | inf          | #DIV/0! |
| MAP6D1  | 0.1904761905  | 0.1904761905  | 0.05555555556 |  | 3.294117647  | #DIV/0! |
| MAP7D1  | 0.04761904762 | 0.04761904762 | 0.05555555556 |  | 0.7          | #DIV/0! |
| MAP9    | 0             | 0             | 0.05555555556 |  | 0            | #DIV/0! |
| MAPK10  | 0.04761904762 | 0.04761904762 | 0.05555555556 |  | 0.7          | #DIV/0! |
| MAPK10  | 0             | 0             | 0.05555555556 |  | 0            | #DIV/0! |
| MAPK11  | 0             | 0             | 0.1111111111  |  | 0            | #DIV/0! |
| MAPK12  | 0             | 0             | 0.1111111111  |  | 0            | #DIV/0! |
| MAPK13  | 0.04761904762 | 0.04761904762 | 0.05555555556 |  | 0.7          | #DIV/0! |
| MAPK14  | 0.04761904762 | 0.04761904762 | 0.05555555556 |  | 0.7          | #DIV/0! |
| MAPK15  | 0.04761904762 | 0.04761904762 | 0.1666666667  |  | 0.2          | #DIV/0! |
| APK1IP  | 0.04761904762 | 0.04761904762 | 0             |  | inf          | #DIV/0! |
| MAPK30  | 0.04761904762 | 0.04761904762 | 0             |  | inf          | #DIV/0! |
| MAPK40  | 0.04761904762 | 0.04761904762 | 0             |  | inf          | #DIV/0! |
| MAPK60  | 0.04761904762 | 0.04761904762 | 0.05555555556 |  | 0.7          | #DIV/0! |
| APK6-D0 | 0.04761904762 | 0.04761904762 | 0.05555555556 |  | 0.7          | #DIV/0! |
| MAPK70  | 0.04761904762 | 0.04761904762 | 0.05555555556 |  | 0.7          | #DIV/0! |
| MAPK80  | 0.09523809524 | 0.09523809524 | 0.05555555556 |  | 1.473684211  | #DIV/0! |
| APK8IP1 | 0.1428571429  | 0.1428571429  | 0             |  | inf          | #DIV/0! |
| IAPK8IF | 0             | 0             | 0.1111111111  |  | 0            | #DIV/0! |
| IAPK8IF | 0.09523809524 | 0.09523809524 | 0.2222222222  |  | 0.2894736842 | #DIV/0! |
| MAPK90  | 0.09523809524 | 0.09523809524 | 0.05555555556 |  | 1.473684211  | #DIV/0! |
| IAPKAP  | 0.09523809524 | 0.09523809524 | 0.05555555556 |  | 1.473684211  | #DIV/0! |
| APKAP1  | 0.1428571429  | 0.1428571429  | 0             |  | inf          | #DIV/0! |
| APKAP1  | 0.09523809524 | 0.09523809524 | 0             |  | inf          | #DIV/0! |
| APKAP1  | 0             | 0             | 0.1111111111  |  | 0            | #DIV/0! |



|         |               |               |              |  |              |         |
|---------|---------------|---------------|--------------|--|--------------|---------|
| KAPK5   | 0             | 0             | 0.1111111111 |  | 0            | #DIV/0! |
| MAPRE0  | 0.09523809524 | 0.09523809524 | 0.1111111111 |  | 0.6842105263 | #DIV/0! |
| MAPRE2  | 0.09523809524 | 0.09523809524 | 0            |  | inf          | #DIV/0! |
| MAPT    | 0.1428571429  | 0.1428571429  | 0            |  | inf          | #DIV/0! |
| IAPT-AS | 0.1428571429  | 0.1428571429  | 0            |  | inf          | #DIV/0! |
| IAPT-IT | 0.1428571429  | 0.1428571429  | 0            |  | inf          | #DIV/0! |
| MARC1   | 0.1428571429  | 0.1428571429  | 0.0555555556 |  | 2.333333333  | #DIV/0! |
| MARC2   | 0.1428571429  | 0.1428571429  | 0.0555555556 |  | 2.333333333  | #DIV/0! |
| IARCH0  | 0.04761904762 | 0.04761904762 | 0.0555555556 |  | 0.7          | #DIV/0! |
| IARCH1  | 0.04761904762 | 0.04761904762 | 0            |  | inf          | #DIV/0! |
| IARCH1  | 0.04761904762 | 0.04761904762 | 0.0555555556 |  | 0.7          | #DIV/0! |
| IARCH1  | 0.1428571429  | 0.1428571429  | 0.0555555556 |  | 2.333333333  | #DIV/0! |
| IARCH1  | 0.04761904762 | 0.04761904762 | 0            |  | inf          | #DIV/0! |
| IARCH1  | 0             | 0             | 0.0555555556 |  | 0            | #DIV/0! |
| IARCH1  | 0.1428571429  | 0.1428571429  | 0.1111111111 |  | 1.083333333  | #DIV/0! |
| IARCH1  | 0.04761904762 | 0.04761904762 | 0.0555555556 |  | 0.7          | #DIV/0! |
| IARCH1  | 0             | 0             | 0.0555555556 |  | 0            | #DIV/0! |
| IARCH1  | 0.1428571429  | 0.1428571429  | 0.0555555556 |  | 2.333333333  | #DIV/0! |
| IARCH1  | 0.1428571429  | 0.1428571429  | 0.0555555556 |  | 2.333333333  | #DIV/0! |
| ARCKS1  | 0.04761904762 | 0.04761904762 | 0.1111111111 |  | 0.325        | #DIV/0! |
| MARCO   | 0             | 0             | 0.0555555556 |  | 0            | #DIV/0! |
| MARF1   | 0.04761904762 | 0.04761904762 | 0            |  | inf          | #DIV/0! |
| MARK1   | 0.1428571429  | 0.1428571429  | 0.0555555556 |  | 2.333333333  | #DIV/0! |
| IARK2P  | 0.1428571429  | 0.1428571429  | 0.1111111111 |  | 1.083333333  | #DIV/0! |
| MARK4   | 0.09523809524 | 0.09523809524 | 0.1111111111 |  | 0.6842105263 | #DIV/0! |
| MARS2   | 0             | 0             | 0.0555555556 |  | 0            | #DIV/0! |
| ARVEL1  | 0.1428571429  | 0.1428571429  | 0            |  | inf          | #DIV/0! |
| ARVEL1  | 0.04761904762 | 0.04761904762 | 0.0555555556 |  | 0.7          | #DIV/0! |
| ARVEL1  | 0.04761904762 | 0.04761904762 | 0            |  | inf          | #DIV/0! |
| MASPI   | 0.09523809524 | 0.09523809524 | 0.0555555556 |  | 1.473684211  | #DIV/0! |
| MASP2   | 0.04761904762 | 0.04761904762 | 0.1111111111 |  | 0.325        | #DIV/0! |
| MAST1   | 0.1428571429  | 0.1428571429  | 0.1111111111 |  | 1.083333333  | #DIV/0! |
| MAST2   | 0.04761904762 | 0.04761904762 | 0.0555555556 |  | 0.7          | #DIV/0! |
| MAST3   | 0.1428571429  | 0.1428571429  | 0.1111111111 |  | 1.083333333  | #DIV/0! |
| MAST4   | 0.04761904762 | 0.04761904762 | 0            |  | inf          | #DIV/0! |
| AST4-A  | 0.04761904762 | 0.04761904762 | 0            |  | inf          | #DIV/0! |
| MASTL   | 0.09523809524 | 0.09523809524 | 0.1111111111 |  | 0.6842105263 | #DIV/0! |
| MAT1A   | 0.1428571429  | 0.1428571429  | 0            |  | inf          | #DIV/0! |
| MAT2A   | 0             | 0             | 0.0555555556 |  | 0            | #DIV/0! |
| MAT2B   | 0             | 0             | 0.0555555556 |  | 0            | #DIV/0! |
| MATK    | 0.09523809524 | 0.09523809524 | 0.0555555556 |  | 1.473684211  | #DIV/0! |
| MATN1   | 0             | 0             | 0.1111111111 |  | 0            | #DIV/0! |
| ATN1-A  | 0             | 0             | 0.1111111111 |  | 0            | #DIV/0! |
| MATN2   | 0.1904761905  | 0.1904761905  | 0.1111111111 |  | 1.529411765  | #DIV/0! |
| MATN3   | 0             | 0             | 0.0555555556 |  | 0            | #DIV/0! |
| MATN4   | 0.1428571429  | 0.1428571429  | 0.1666666667 |  | 0.6666666667 | #DIV/0! |
| MATR3   | 0.04761904762 | 0.04761904762 | 0            |  | inf          | #DIV/0! |
| MAU2    | 0.1428571429  | 0.1428571429  | 0.1111111111 |  | 1.083333333  | #DIV/0! |
| MAVS    | 0.1904761905  | 0.1904761905  | 0.0555555556 |  | 3.294117647  | #DIV/0! |
| MAZ     | 0.04761904762 | 0.04761904762 | 0            |  | inf          | #DIV/0! |
| MB      | 0             | 0             | 0.1111111111 |  | 0            | #DIV/0! |

|               |               |               |               |  |              |         |
|---------------|---------------|---------------|---------------|--|--------------|---------|
| <b>MB21D2</b> | 0.09523809524 | 0.09523809524 | 0.05555555556 |  | 1.473684211  | #DIV/0! |
| <b>MBD1</b>   | 0.04761904762 | 0.04761904762 | 0             |  | inf          | #DIV/0! |
| <b>MBD2</b>   | 0.09523809524 | 0.09523809524 | 0             |  | inf          | #DIV/0! |
| <b>MBD3</b>   | 0.09523809524 | 0.09523809524 | 0.1111111111  |  | 0.6842105263 | #DIV/0! |
| <b>MBD3L1</b> | 0.1428571429  | 0.1428571429  | 0.05555555556 |  | 2.333333333  | #DIV/0! |
| <b>MBD3L2</b> | 0.1428571429  | 0.1428571429  | 0.05555555556 |  | 2.333333333  | #DIV/0! |
| <b>MBD3L2</b> | 0.1428571429  | 0.1428571429  | 0.05555555556 |  | 2.333333333  | #DIV/0! |
| <b>MBD3L3</b> | 0.1428571429  | 0.1428571429  | 0.05555555556 |  | 2.333333333  | #DIV/0! |
| <b>MBD3L4</b> | 0.1428571429  | 0.1428571429  | 0.05555555556 |  | 2.333333333  | #DIV/0! |
| <b>MBD3L5</b> | 0.1428571429  | 0.1428571429  | 0.05555555556 |  | 2.333333333  | #DIV/0! |
| <b>MBD4</b>   | 0.09523809524 | 0.09523809524 | 0.05555555556 |  | 1.473684211  | #DIV/0! |
| <b>MBD5</b>   | 0             | 0             | 0.05555555556 |  | 0            | #DIV/0! |
| <b>MBL1P</b>  | 0.1428571429  | 0.1428571429  | 0             |  | inf          | #DIV/0! |
| <b>MBL2</b>   | 0.04761904762 | 0.04761904762 | 0.05555555556 |  | 0.7          | #DIV/0! |
| <b>MBLAC</b>  | 0.04761904762 | 0.04761904762 | 0.05555555556 |  | 0.7          | #DIV/0! |
| <b>MBLAC</b>  | 0.04761904762 | 0.04761904762 | 0             |  | inf          | #DIV/0! |
| <b>MBNL1</b>  | 0.1904761905  | 0.1904761905  | 0.1111111111  |  | 1.529411765  | #DIV/0! |
| <b>BNL1-A</b> | 0.1904761905  | 0.1904761905  | 0.1111111111  |  | 1.529411765  | #DIV/0! |
| <b>MBOAT</b>  | 0             | 0             | 0.05555555556 |  | 0            | #DIV/0! |
| <b>MBOAT</b>  | 0.04761904762 | 0.04761904762 | 0.1111111111  |  | 0.325        | #DIV/0! |
| <b>MBOAT</b>  | 0.09523809524 | 0.09523809524 | 0.05555555556 |  | 1.473684211  | #DIV/0! |
| <b>MBP</b>    | 0.09523809524 | 0.09523809524 | 0.05555555556 |  | 1.473684211  | #DIV/0! |
| <b>MBTD1</b>  | 0.04761904762 | 0.04761904762 | 0             |  | inf          | #DIV/0! |
| <b>MBTPS1</b> | 0.04761904762 | 0.04761904762 | 0             |  | inf          | #DIV/0! |
| <b>MC1R</b>   | 0.09523809524 | 0.09523809524 | 0             |  | inf          | #DIV/0! |
| <b>MC2R</b>   | 0.09523809524 | 0.09523809524 | 0.05555555556 |  | 1.473684211  | #DIV/0! |
| <b>MC3R</b>   | 0.09523809524 | 0.09523809524 | 0.1666666667  |  | 0.4210526316 | #DIV/0! |
| <b>MC4R</b>   | 0.09523809524 | 0.09523809524 | 0             |  | inf          | #DIV/0! |
| <b>MC5R</b>   | 0.09523809524 | 0.09523809524 | 0.05555555556 |  | 1.473684211  | #DIV/0! |
| <b>MCAT</b>   | 0             | 0             | 0.1666666667  |  | 0            | #DIV/0! |
| <b>MCC</b>    | 0.04761904762 | 0.04761904762 | 0             |  | inf          | #DIV/0! |
| <b>MCCC1</b>  | 0.1904761905  | 0.1904761905  | 0.05555555556 |  | 3.294117647  | #DIV/0! |
| <b>MCCC2</b>  | 0.04761904762 | 0.04761904762 | 0             |  | inf          | #DIV/0! |
| <b>MCCD1</b>  | 0.04761904762 | 0.04761904762 | 0             |  | inf          | #DIV/0! |
| <b>MCEE</b>   | 0             | 0             | 0.05555555556 |  | 0            | #DIV/0! |
| <b>ICEMP</b>  | 0.1428571429  | 0.1428571429  | 0.05555555556 |  | 2.333333333  | #DIV/0! |
| <b>MCF2L2</b> | 0.1904761905  | 0.1904761905  | 0.05555555556 |  | 3.294117647  | #DIV/0! |
| <b>MCFD2</b>  | 0             | 0             | 0.05555555556 |  | 0            | #DIV/0! |
| <b>MCHR1</b>  | 0             | 0             | 0.1111111111  |  | 0            | #DIV/0! |
| <b>MCIDAS</b> | 0.04761904762 | 0.04761904762 | 0.05555555556 |  | 0.7          | #DIV/0! |
| <b>MCL1</b>   | 0.1904761905  | 0.1904761905  | 0.05555555556 |  | 3.294117647  | #DIV/0! |
| <b>MCM10</b>  | 0.09523809524 | 0.09523809524 | 0.1111111111  |  | 0.6842105263 | #DIV/0! |
| <b>MCM2</b>   | 0.09523809524 | 0.09523809524 | 0.05555555556 |  | 1.473684211  | #DIV/0! |
| <b>MCM3</b>   | 0.04761904762 | 0.04761904762 | 0             |  | inf          | #DIV/0! |
| <b>ICM3A1</b> | 0.04761904762 | 0.04761904762 | 0.1111111111  |  | 0.325        | #DIV/0! |
| <b>M3AP-A</b> | 0.04761904762 | 0.04761904762 | 0.1111111111  |  | 0.325        | #DIV/0! |
| <b>MCM4</b>   | 0.09523809524 | 0.09523809524 | 0.1666666667  |  | 0.4210526316 | #DIV/0! |
| <b>MCM5</b>   | 0             | 0             | 0.1111111111  |  | 0            | #DIV/0! |
| <b>MCM6</b>   | 0.04761904762 | 0.04761904762 | 0.05555555556 |  | 0.7          | #DIV/0! |
| <b>MCM7</b>   | 0.04761904762 | 0.04761904762 | 0.05555555556 |  | 0.7          | #DIV/0! |
| <b>MCM8</b>   | 0.1904761905  | 0.1904761905  | 0.05555555556 |  | 3.294117647  | #DIV/0! |

|        |               |               |               |  |               |         |
|--------|---------------|---------------|---------------|--|---------------|---------|
| CM8-A  | 0.1904761905  | 0.1904761905  | 0.05555555556 |  | 3.294117647   | #DIV/0! |
| MCMBP  | 0.2380952381  | 0.2380952381  | 0             |  | inf           | #DIV/0! |
| ICMDC  | 0.1428571429  | 0.1428571429  | 0.16666666667 |  | 0.66666666667 | #DIV/0! |
| ICOLN  | 0.1428571429  | 0.1428571429  | 0.05555555556 |  | 2.333333333   | #DIV/0! |
| ICOLN0 | 0.04761904762 | 0.04761904762 | 0.05555555556 |  | 0.7           | #DIV/0! |
| ICOLN1 | 0.04761904762 | 0.04761904762 | 0.05555555556 |  | 0.7           | #DIV/0! |
| MCPH1  | 0.09523809524 | 0.09523809524 | 0.1111111111  |  | 0.6842105263  | #DIV/0! |
| CPH1-A | 0.09523809524 | 0.09523809524 | 0.1111111111  |  | 0.6842105263  | #DIV/0! |
| MCRIP1 | 0.04761904762 | 0.04761904762 | 0             |  | inf           | #DIV/0! |
| MCRIP2 | 0.04761904762 | 0.04761904762 | 0.2222222222  |  | 0.1375        | #DIV/0! |
| MCRS1  | 0.04761904762 | 0.04761904762 | 0.05555555556 |  | 0.7           | #DIV/0! |
| MCTP1  | 0.04761904762 | 0.04761904762 | 0             |  | inf           | #DIV/0! |
| MCTP2  | 0.04761904762 | 0.04761904762 | 0.05555555556 |  | 0.7           | #DIV/0! |
| MCU    | 0.1904761905  | 0.1904761905  | 0.05555555556 |  | 3.294117647   | #DIV/0! |
| MCUB   | 0             | 0             | 0.05555555556 |  | 0             | #DIV/0! |
| MDFI   | 0             | 0             | 0.05555555556 |  | 0             | #DIV/0! |
| MDFIC  | 0.04761904762 | 0.04761904762 | 0.1111111111  |  | 0.325         | #DIV/0! |
| MDFIC2 | 0.04761904762 | 0.04761904762 | 0             |  | inf           | #DIV/0! |
| MDGA1  | 0.04761904762 | 0.04761904762 | 0.05555555556 |  | 0.7           | #DIV/0! |
| MDGA2  | 0.04761904762 | 0.04761904762 | 0             |  | inf           | #DIV/0! |
| MDH1   | 0             | 0             | 0.05555555556 |  | 0             | #DIV/0! |
| MDH1B  | 0             | 0             | 0.05555555556 |  | 0             | #DIV/0! |
| MDH2   | 0.1428571429  | 0.1428571429  | 0.1111111111  |  | 1.083333333   | #DIV/0! |
| MDK    | 0             | 0             | 0.05555555556 |  | 0             | #DIV/0! |
| MDM1   | 0.09523809524 | 0.09523809524 | 0.05555555556 |  | 1.473684211   | #DIV/0! |
| MDM2   | 0.09523809524 | 0.09523809524 | 0.1111111111  |  | 0.6842105263  | #DIV/0! |
| MDM4   | 0.2380952381  | 0.2380952381  | 0             |  | inf           | #DIV/0! |
| MDN1   | 0             | 0             | 0             |  |               | #DIV/0! |
| MDS2   | 0.04761904762 | 0.04761904762 | 0.1111111111  |  | 0.325         | #DIV/0! |
| ME2    | 0.04761904762 | 0.04761904762 | 0             |  | inf           | #DIV/0! |
| MEA1   | 0.04761904762 | 0.04761904762 | 0.05555555556 |  | 0.7           | #DIV/0! |
| MEAF6  | 0.04761904762 | 0.04761904762 | 0.05555555556 |  | 0.7           | #DIV/0! |
| MEAK7  | 0.04761904762 | 0.04761904762 | 0             |  | inf           | #DIV/0! |
| MECOM  | 0.1428571429  | 0.1428571429  | 0.05555555556 |  | 2.333333333   | #DIV/0! |
| MECR   | 0.04761904762 | 0.04761904762 | 0.1111111111  |  | 0.325         | #DIV/0! |
| MED1   | 0.09523809524 | 0.09523809524 | 0             |  | inf           | #DIV/0! |
| MED10  | 0             | 0             | 0.1111111111  |  | 0             | #DIV/0! |
| MED11  | 0             | 0             | 0.1111111111  |  | 0             | #DIV/0! |
| MED12L | 0.1904761905  | 0.1904761905  | 0.1111111111  |  | 1.529411765   | #DIV/0! |
| MED13  | 0.09523809524 | 0.09523809524 | 0             |  | inf           | #DIV/0! |
| MED13L | 0             | 0             | 0.05555555556 |  | 0             | #DIV/0! |
| MED15  | 0.04761904762 | 0.04761904762 | 0.05555555556 |  | 0.7           | #DIV/0! |
| IED15P | 0             | 0             | 0.05555555556 |  | 0             | #DIV/0! |
| MED16  | 0.09523809524 | 0.09523809524 | 0.1111111111  |  | 0.6842105263  | #DIV/0! |
| MED18  | 0.04761904762 | 0.04761904762 | 0.1111111111  |  | 0.325         | #DIV/0! |
| MED20  | 0.04761904762 | 0.04761904762 | 0.05555555556 |  | 0.7           | #DIV/0! |
| MED21  | 0.04761904762 | 0.04761904762 | 0.05555555556 |  | 0.7           | #DIV/0! |
| MED22  | 0.04761904762 | 0.04761904762 | 0             |  | inf           | #DIV/0! |
| MED24  | 0.09523809524 | 0.09523809524 | 0             |  | inf           | #DIV/0! |
| MED25  | 0.09523809524 | 0.09523809524 | 0.1111111111  |  | 0.6842105263  | #DIV/0! |
| MED26  | 0.1428571429  | 0.1428571429  | 0.1111111111  |  | 1.083333333   | #DIV/0! |

|         |               |               |               |  |               |         |
|---------|---------------|---------------|---------------|--|---------------|---------|
| MED27   | 0.09523809524 | 0.09523809524 | 0             |  | inf           | #DIV/0! |
| MED28   | 0             | 0             | 0             |  |               | #DIV/0! |
| MED29   | 0.04761904762 | 0.04761904762 | 0.05555555556 |  | 0.7           | #DIV/0! |
| MED30   | 0.1428571429  | 0.1428571429  | 0.16666666667 |  | 0.66666666667 | #DIV/0! |
| MED31   | 0             | 0             | 0.05555555556 |  | 0             | #DIV/0! |
| MED7    | 0.04761904762 | 0.04761904762 | 0.05555555556 |  | 0.7           | #DIV/0! |
| MED8    | 0.04761904762 | 0.04761904762 | 0.05555555556 |  | 0.7           | #DIV/0! |
| MED9    | 0.04761904762 | 0.04761904762 | 0.11111111111 |  | 0.325         | #DIV/0! |
| MEF2A   | 0.04761904762 | 0.04761904762 | 0.05555555556 |  | 0.7           | #DIV/0! |
| MEF2B   | 0.1428571429  | 0.1428571429  | 0.11111111111 |  | 1.083333333   | #DIV/0! |
| MEF2C   | 0.04761904762 | 0.04761904762 | 0             |  | inf           | #DIV/0! |
| EF2C-AS | 0.04761904762 | 0.04761904762 | 0             |  | inf           | #DIV/0! |
| EF2C-AS | 0.04761904762 | 0.04761904762 | 0             |  | inf           | #DIV/0! |
| MEF2D   | 0.1428571429  | 0.1428571429  | 0.11111111111 |  | 1.083333333   | #DIV/0! |
| MEFV    | 0.04761904762 | 0.04761904762 | 0.11111111111 |  | 0.325         | #DIV/0! |
| MEGF10  | 0.04761904762 | 0.04761904762 | 0             |  | inf           | #DIV/0! |
| MEGF11  | 0.04761904762 | 0.04761904762 | 0.05555555556 |  | 0.7           | #DIV/0! |
| MEGF6   | 0             | 0             | 0.05555555556 |  | 0             | #DIV/0! |
| MEGF8   | 0.04761904762 | 0.04761904762 | 0.05555555556 |  | 0.7           | #DIV/0! |
| MEGF9   | 0.09523809524 | 0.09523809524 | 0.05555555556 |  | 1.473684211   | #DIV/0! |
| MEI1    | 0             | 0             | 0.11111111111 |  | 0             | #DIV/0! |
| MEIG1   | 0.09523809524 | 0.09523809524 | 0.11111111111 |  | 0.6842105263  | #DIV/0! |
| MEIKIN  | 0.04761904762 | 0.04761904762 | 0             |  | inf           | #DIV/0! |
| MEIOB   | 0.09523809524 | 0.09523809524 | 0.22222222222 |  | 0.2894736842  | #DIV/0! |
| MEIOC   | 0.09523809524 | 0.09523809524 | 0             |  | inf           | #DIV/0! |
| MEIS1   | 0             | 0             | 0.05555555556 |  | 0             | #DIV/0! |
| EIS1-AS | 0             | 0             | 0.05555555556 |  | 0             | #DIV/0! |
| EIS1-AS | 0             | 0             | 0.05555555556 |  | 0             | #DIV/0! |
| MEIS2   | 0             | 0             | 0             |  |               | #DIV/0! |
| MEIS3   | 0.09523809524 | 0.09523809524 | 0.11111111111 |  | 0.6842105263  | #DIV/0! |
| MEIS3P  | 0.04761904762 | 0.04761904762 | 0.05555555556 |  | 0.7           | #DIV/0! |
| MELK    | 0.09523809524 | 0.09523809524 | 0.05555555556 |  | 1.473684211   | #DIV/0! |
| MELTF   | 0.1428571429  | 0.1428571429  | 0.05555555556 |  | 2.333333333   | #DIV/0! |
| ELTF-A  | 0.1428571429  | 0.1428571429  | 0.05555555556 |  | 2.333333333   | #DIV/0! |
| MEMO1   | 0.1428571429  | 0.1428571429  | 0             |  | inf           | #DIV/0! |
| MEOX1   | 0.04761904762 | 0.04761904762 | 0             |  | inf           | #DIV/0! |
| MEOX2   | 0.04761904762 | 0.04761904762 | 0.22222222222 |  | 0.1375        | #DIV/0! |
| MEP1A   | 0.04761904762 | 0.04761904762 | 0.05555555556 |  | 0.7           | #DIV/0! |
| MEP1B   | 0.09523809524 | 0.09523809524 | 0             |  | inf           | #DIV/0! |
| MEPCE   | 0.04761904762 | 0.04761904762 | 0.05555555556 |  | 0.7           | #DIV/0! |
| MEPE    | 0             | 0             | 0.05555555556 |  | 0             | #DIV/0! |
| MERTK   | 0             | 0             | 0.05555555556 |  | 0             | #DIV/0! |
| MESD    | 0.04761904762 | 0.04761904762 | 0.05555555556 |  | 0.7           | #DIV/0! |
| MESP1   | 0.04761904762 | 0.04761904762 | 0.05555555556 |  | 0.7           | #DIV/0! |
| MESP2   | 0.04761904762 | 0.04761904762 | 0.05555555556 |  | 0.7           | #DIV/0! |
| MEST    | 0.04761904762 | 0.04761904762 | 0.05555555556 |  | 0.7           | #DIV/0! |
| ESTIT   | 0.04761904762 | 0.04761904762 | 0.05555555556 |  | 0.7           | #DIV/0! |
| MET     | 0.09523809524 | 0.09523809524 | 0.22222222222 |  | 0.2894736842  | #DIV/0! |
| METAP1  | 0             | 0             | 0.05555555556 |  | 0             | #DIV/0! |
| ETAP1   | 0             | 0             | 0.05555555556 |  | 0             | #DIV/0! |
| METAP2  | 0.04761904762 | 0.04761904762 | 0.05555555556 |  | 0.7           | #DIV/0! |

|         |               |               |               |  |              |         |
|---------|---------------|---------------|---------------|--|--------------|---------|
| METRNO  | 0.04761904762 | 0.04761904762 | 0.2222222222  |  | 0.1375       | #DIV/0! |
| METTL1  | 0.1428571429  | 0.1428571429  | 0.05555555556 |  | 2.333333333  | #DIV/0! |
| ETTL11  | 0.1428571429  | 0.1428571429  | 0.05555555556 |  | 2.333333333  | #DIV/0! |
| IETTL1  | 0             | 0             | 0.05555555556 |  | 0            | #DIV/0! |
| TTL14-  | 0             | 0             | 0.05555555556 |  | 0            | #DIV/0! |
| IETTL1  | 0             | 0             | 0.1111111111  |  | 0            | #DIV/0! |
| IETTL1  | 0.1428571429  | 0.1428571429  | 0.05555555556 |  | 2.333333333  | #DIV/0! |
| ETTL21  | 0             | 0             | 0.05555555556 |  | 0            | #DIV/0! |
| IETTL2  | 0.04761904762 | 0.04761904762 | 0             |  | inf          | #DIV/0! |
| IETTL2  | 0.04761904762 | 0.04761904762 | 0             |  | inf          | #DIV/0! |
| IETTL2  | 0             | 0             | 0             |  |              | #DIV/0! |
| IETTL2  | 0.04761904762 | 0.04761904762 | 0.05555555556 |  | 0.7          | #DIV/0! |
| IETTL2  | 0.04761904762 | 0.04761904762 | 0.2222222222  |  | 0.1375       | #DIV/0! |
| IETTL2  | 0.1428571429  | 0.1428571429  | 0.1111111111  |  | 1.083333333  | #DIV/0! |
| IETTL2  | 0.04761904762 | 0.04761904762 | 0             |  | inf          | #DIV/0! |
| IETTL2  | 0.04761904762 | 0.04761904762 | 0.05555555556 |  | 0.7          | #DIV/0! |
| METTL4  | 0.09523809524 | 0.09523809524 | 0             |  | inf          | #DIV/0! |
| METTL5  | 0             | 0             | 0.05555555556 |  | 0            | #DIV/0! |
| METTL6  | 0.04761904762 | 0.04761904762 | 0             |  | inf          | #DIV/0! |
| IETTL7  | 0.09523809524 | 0.09523809524 | 0.05555555556 |  | 1.473684211  | #DIV/0! |
| IETTL7  | 0.04761904762 | 0.04761904762 | 0.05555555556 |  | 0.7          | #DIV/0! |
| METTL8  | 0             | 0             | 0.05555555556 |  | 0            | #DIV/0! |
| METTL9  | 0.04761904762 | 0.04761904762 | 0             |  | inf          | #DIV/0! |
| MEX3A   | 0.1428571429  | 0.1428571429  | 0.1111111111  |  | 1.083333333  | #DIV/0! |
| MEX3B   | 0.04761904762 | 0.04761904762 | 0.05555555556 |  | 0.7          | #DIV/0! |
| MEX3C   | 0.09523809524 | 0.09523809524 | 0             |  | inf          | #DIV/0! |
| MEX3D   | 0.09523809524 | 0.09523809524 | 0.1111111111  |  | 0.6842105263 | #DIV/0! |
| MFAP2   | 0.04761904762 | 0.04761904762 | 0.1111111111  |  | 0.325        | #DIV/0! |
| MFAP3I  | 0             | 0             | 0.05555555556 |  | 0            | #DIV/0! |
| MFAP4   | 0.04761904762 | 0.04761904762 | 0.05555555556 |  | 0.7          | #DIV/0! |
| MFAP5   | 0.04761904762 | 0.04761904762 | 0.1111111111  |  | 0.325        | #DIV/0! |
| MFF     | 0             | 0             | 0.05555555556 |  | 0            | #DIV/0! |
| MFGES   | 0.04761904762 | 0.04761904762 | 0.05555555556 |  | 0.7          | #DIV/0! |
| MFHAS   | 0.09523809524 | 0.09523809524 | 0.1111111111  |  | 0.6842105263 | #DIV/0! |
| MFN1    | 0.1904761905  | 0.1904761905  | 0.05555555556 |  | 3.294117647  | #DIV/0! |
| MFN2    | 0.04761904762 | 0.04761904762 | 0.1111111111  |  | 0.325        | #DIV/0! |
| MFNG    | 0             | 0             | 0.1111111111  |  | 0            | #DIV/0! |
| MFSD1   | 0.1428571429  | 0.1428571429  | 0.05555555556 |  | 2.333333333  | #DIV/0! |
| MFSD10  | 0.04761904762 | 0.04761904762 | 0             |  | inf          | #DIV/0! |
| MFSD11  | 0.04761904762 | 0.04761904762 | 0             |  | inf          | #DIV/0! |
| MFSD12  | 0.09523809524 | 0.09523809524 | 0.05555555556 |  | 1.473684211  | #DIV/0! |
| IFSD13  | 0.1428571429  | 0.1428571429  | 0.05555555556 |  | 2.333333333  | #DIV/0! |
| IFSD13I | 0.04761904762 | 0.04761904762 | 0             |  | inf          | #DIV/0! |
| IFSD14  | 0.04761904762 | 0.04761904762 | 0.05555555556 |  | 0.7          | #DIV/0! |
| IFSD14I | 0.04761904762 | 0.04761904762 | 0.05555555556 |  | 0.7          | #DIV/0! |
| IFSD14C | 0.04761904762 | 0.04761904762 | 0             |  | inf          | #DIV/0! |
| MFSD2A  | 0.04761904762 | 0.04761904762 | 0.05555555556 |  | 0.7          | #DIV/0! |
| MFSD3   | 0.04761904762 | 0.04761904762 | 0.1666666667  |  | 0.2          | #DIV/0! |
| MFSD4A  | 0.1428571429  | 0.1428571429  | 0             |  | inf          | #DIV/0! |
| SD4A-A  | 0.1428571429  | 0.1428571429  | 0             |  | inf          | #DIV/0! |
| MFSD4B  | 0             | 0             | 0             |  |              | #DIV/0! |

|         |               |               |               |  |              |         |
|---------|---------------|---------------|---------------|--|--------------|---------|
| MFSD5   | 0.04761904762 | 0.04761904762 | 0.05555555556 |  | 0.7          | #DIV/0! |
| MFSD6   | 0             | 0             | 0.05555555556 |  | 0            | #DIV/0! |
| MFSD6L  | 0.04761904762 | 0.04761904762 | 0.05555555556 |  | 0.7          | #DIV/0! |
| MFSD8   | 0             | 0             | 0.05555555556 |  | 0            | #DIV/0! |
| MFSD9   | 0             | 0             | 0.05555555556 |  | 0            | #DIV/0! |
| MGAM    | 0.04761904762 | 0.04761904762 | 0.05555555556 |  | 0.7          | #DIV/0! |
| MGAM2   | 0.04761904762 | 0.04761904762 | 0.05555555556 |  | 0.7          | #DIV/0! |
| MGARPO  | 0.04761904762 | 0.04761904762 | 0.05555555556 |  | 0.7          | #DIV/0! |
| MGAT1   | 0.09523809524 | 0.09523809524 | 0.05555555556 |  | 1.473684211  | #DIV/0! |
| MGAT2   | 0.04761904762 | 0.04761904762 | 0             |  | inf          | #DIV/0! |
| MGAT3   | 0             | 0             | 0.1111111111  |  | 0            | #DIV/0! |
| GAT3-A  | 0             | 0             | 0.1111111111  |  | 0            | #DIV/0! |
| MGAT4   | 0             | 0             | 0.05555555556 |  | 0            | #DIV/0! |
| MGAT4I  | 0.09523809524 | 0.09523809524 | 0.05555555556 |  | 1.473684211  | #DIV/0! |
| MGAT4O  | 0.04761904762 | 0.04761904762 | 0.05555555556 |  | 0.7          | #DIV/0! |
| MGAT4I  | 0             | 0             | 0.05555555556 |  | 0            | #DIV/0! |
| MGAT4E  | 0.1428571429  | 0.1428571429  | 0             |  | inf          | #DIV/0! |
| MGAT5   | 0             | 0             | 0.05555555556 |  | 0            | #DIV/0! |
| MGAT5I  | 0.04761904762 | 0.04761904762 | 0             |  | inf          | #DIV/0! |
| IGC129I | 0.04761904762 | 0.04761904762 | 0.05555555556 |  | 0.7          | #DIV/0! |
| IGC1588 | 0.04761904762 | 0.04761904762 | 0.05555555556 |  | 0.7          | #DIV/0! |
| IGC1602 | 0             | 0             | 0.05555555556 |  | 0            | #DIV/0! |
| IGC1627 | 0.04761904762 | 0.04761904762 | 0             |  | inf          | #DIV/0! |
| IGC2734 | 0.04761904762 | 0.04761904762 | 0.05555555556 |  | 0.7          | #DIV/0! |
| IGC2738 | 0.04761904762 | 0.04761904762 | 0.05555555556 |  | 0.7          | #DIV/0! |
| IGC2880 | 0.09523809524 | 0.09523809524 | 0.05555555556 |  | 1.473684211  | #DIV/0! |
| IGC3280 | 0.04761904762 | 0.04761904762 | 0             |  | inf          | #DIV/0! |
| IGC3479 | 0.04761904762 | 0.04761904762 | 0.05555555556 |  | 0.7          | #DIV/0! |
| IGC4850 | 0.04761904762 | 0.04761904762 | 0.2222222222  |  | 0.1375       | #DIV/0! |
| MGME1   | 0.1904761905  | 0.1904761905  | 0.1111111111  |  | 1.529411765  | #DIV/0! |
| MGMT    | 0.2857142857  | 0.2857142857  | 0             |  | inf          | #DIV/0! |
| MGP     | 0.04761904762 | 0.04761904762 | 0.1111111111  |  | 0.325        | #DIV/0! |
| MGRN1   | 0.04761904762 | 0.04761904762 | 0             |  | inf          | #DIV/0! |
| MGST1   | 0.04761904762 | 0.04761904762 | 0.1111111111  |  | 0.325        | #DIV/0! |
| MGST2   | 0             | 0             | 0.05555555556 |  | 0            | #DIV/0! |
| MGST3   | 0.1428571429  | 0.1428571429  | 0             |  | inf          | #DIV/0! |
| IHENC1  | 0.1428571429  | 0.1428571429  | 0.2222222222  |  | 0.4583333333 | #DIV/0! |
| MHRT    | 0             | 0             | 0.05555555556 |  | 0            | #DIV/0! |
| MIA2    | 0.04761904762 | 0.04761904762 | 0             |  | inf          | #DIV/0! |
| MIA3    | 0.1428571429  | 0.1428571429  | 0.05555555556 |  | 2.333333333  | #DIV/0! |
| MIAT    | 0.04761904762 | 0.04761904762 | 0.05555555556 |  | 0.7          | #DIV/0! |
| MIATNE  | 0.04761904762 | 0.04761904762 | 0.05555555556 |  | 0.7          | #DIV/0! |
| MIB1    | 0.04761904762 | 0.04761904762 | 0.1111111111  |  | 0.325        | #DIV/0! |
| MIB2    | 0             | 0             | 0.1111111111  |  | 0            | #DIV/0! |
| MICA    | 0.04761904762 | 0.04761904762 | 0             |  | inf          | #DIV/0! |
| MICAL1  | 0             | 0             | 0             |  |              | #DIV/0! |
| MICAL3  | 0.04761904762 | 0.04761904762 | 0.05555555556 |  | 0.7          | #DIV/0! |
| IICALL  | 0             | 0             | 0.1111111111  |  | 0            | #DIV/0! |
| IICALL  | 0.04761904762 | 0.04761904762 | 0.1666666667  |  | 0.2          | #DIV/0! |
| MICB    | 0.04761904762 | 0.04761904762 | 0             |  | inf          | #DIV/0! |
| IICB-D  | 0.04761904762 | 0.04761904762 | 0             |  | inf          | #DIV/0! |

|         |               |               |               |  |              |         |
|---------|---------------|---------------|---------------|--|--------------|---------|
| IICOS10 | 0.04761904762 | 0.04761904762 | 0.1111111111  |  | 0.325        | #DIV/0! |
| OS10-N  | 0.04761904762 | 0.04761904762 | 0.1111111111  |  | 0.325        | #DIV/0! |
| IICOS1  | 0.1428571429  | 0.1428571429  | 0.05555555556 |  | 2.333333333  | #DIV/0! |
| MICU1   | 0.1904761905  | 0.1904761905  | 0.05555555556 |  | 3.294117647  | #DIV/0! |
| MICU3   | 0.09523809524 | 0.09523809524 | 0.1111111111  |  | 0.6842105263 | #DIV/0! |
| MIDN    | 0.09523809524 | 0.09523809524 | 0.1111111111  |  | 0.6842105263 | #DIV/0! |
| MIEF1   | 0             | 0             | 0.1111111111  |  | 0            | #DIV/0! |
| MIEN1   | 0.09523809524 | 0.09523809524 | 0             |  | inf          | #DIV/0! |
| MIER1   | 0.04761904762 | 0.04761904762 | 0.05555555556 |  | 0.7          | #DIV/0! |
| MIER2   | 0.09523809524 | 0.09523809524 | 0.1111111111  |  | 0.6842105263 | #DIV/0! |
| MIER3   | 0.04761904762 | 0.04761904762 | 0             |  | inf          | #DIV/0! |
| MIF     | 0.04761904762 | 0.04761904762 | 0.1111111111  |  | 0.325        | #DIV/0! |
| MIF-AS1 | 0.04761904762 | 0.04761904762 | 0.1111111111  |  | 0.325        | #DIV/0! |
| MIF4GD  | 0.04761904762 | 0.04761904762 | 0.05555555556 |  | 0.7          | #DIV/0! |
| MIG7    | 0.04761904762 | 0.04761904762 | 0.05555555556 |  | 0.7          | #DIV/0! |
| MIGA1   | 0.04761904762 | 0.04761904762 | 0.05555555556 |  | 0.7          | #DIV/0! |
| MIIP    | 0.04761904762 | 0.04761904762 | 0.1111111111  |  | 0.325        | #DIV/0! |
| MILR1   | 0.04761904762 | 0.04761904762 | 0             |  | inf          | #DIV/0! |
| MIMT1   | 0.1428571429  | 0.1428571429  | 0.05555555556 |  | 2.333333333  | #DIV/0! |
| MINAR1  | 0.04761904762 | 0.04761904762 | 0.05555555556 |  | 0.7          | #DIV/0! |
| MINAR2  | 0.04761904762 | 0.04761904762 | 0             |  | inf          | #DIV/0! |
| MINDY1  | 0.1904761905  | 0.1904761905  | 0.05555555556 |  | 3.294117647  | #DIV/0! |
| MINDY2  | 0.04761904762 | 0.04761904762 | 0.05555555556 |  | 0.7          | #DIV/0! |
| MINDY3  | 0.09523809524 | 0.09523809524 | 0.1111111111  |  | 0.6842105263 | #DIV/0! |
| MINDY4  | 0.04761904762 | 0.04761904762 | 0.1111111111  |  | 0.325        | #DIV/0! |
| IINDY4  | 0.1904761905  | 0.1904761905  | 0.1111111111  |  | 1.529411765  | #DIV/0! |
| MINK1   | 0             | 0             | 0.1111111111  |  | 0            | #DIV/0! |
| MINPP1  | 0.1428571429  | 0.1428571429  | 0.1111111111  |  | 1.083333333  | #DIV/0! |
| MIOS    | 0.04761904762 | 0.04761904762 | 0.1666666667  |  | 0.2          | #DIV/0! |
| MIOX    | 0             | 0             | 0.1111111111  |  | 0            | #DIV/0! |
| MIP     | 0.1428571429  | 0.1428571429  | 0.05555555556 |  | 2.333333333  | #DIV/0! |
| MIR1-1  | 0.1428571429  | 0.1428571429  | 0.2222222222  |  | 0.4583333333 | #DIV/0! |
| IIR1-1H | 0.1428571429  | 0.1428571429  | 0.2222222222  |  | 0.4583333333 | #DIV/0! |
| R1-1HG- | 0.1428571429  | 0.1428571429  | 0.2222222222  |  | 0.4583333333 | #DIV/0! |
| MIR1-2  | 0.04761904762 | 0.04761904762 | 0.1111111111  |  | 0.325        | #DIV/0! |
| IIR101- | 0.04761904762 | 0.04761904762 | 0.05555555556 |  | 0.7          | #DIV/0! |
| IIR101- | 0.04761904762 | 0.04761904762 | 0.05555555556 |  | 0.7          | #DIV/0! |
| IIR103A | 0             | 0             | 0.05555555556 |  | 0            | #DIV/0! |
| IIR103A | 0.1904761905  | 0.1904761905  | 0.05555555556 |  | 3.294117647  | #DIV/0! |
| IIR103B | 0             | 0             | 0.05555555556 |  | 0            | #DIV/0! |
| IIR103B | 0.1904761905  | 0.1904761905  | 0.05555555556 |  | 3.294117647  | #DIV/0! |
| MIR1061 | 0.04761904762 | 0.04761904762 | 0.05555555556 |  | 0.7          | #DIV/0! |
| MIR107  | 0.1428571429  | 0.1428571429  | 0.1111111111  |  | 1.083333333  | #DIV/0! |
| MIR10A  | 0.1428571429  | 0.1428571429  | 0             |  | inf          | #DIV/0! |
| MIR1178 | 0             | 0             | 0.05555555556 |  | 0            | #DIV/0! |
| MIR1179 | 0.04761904762 | 0.04761904762 | 0.05555555556 |  | 0.7          | #DIV/0! |
| MIR1180 | 0.04761904762 | 0.04761904762 | 0.1111111111  |  | 0.325        | #DIV/0! |
| MIR1181 | 0.1428571429  | 0.1428571429  | 0.1111111111  |  | 1.083333333  | #DIV/0! |
| MIR1182 | 0.1428571429  | 0.1428571429  | 0             |  | inf          | #DIV/0! |
| MIR1183 | 0.04761904762 | 0.04761904762 | 0.1666666667  |  | 0.2          | #DIV/0! |
| MIR1199 | 0.1428571429  | 0.1428571429  | 0.1111111111  |  | 1.083333333  | #DIV/0! |

|           |               |               |               |  |              |         |
|-----------|---------------|---------------|---------------|--|--------------|---------|
| MIR1200   | 0.04761904762 | 0.04761904762 | 0.2222222222  |  | 0.1375       | #DIV/0! |
| MIR1203   | 0.1428571429  | 0.1428571429  | 0             |  | inf          | #DIV/0! |
| MIR1204   | 0.09523809524 | 0.09523809524 | 0.1111111111  |  | 0.6842105263 | #DIV/0! |
| MIR1205   | 0.09523809524 | 0.09523809524 | 0.1111111111  |  | 0.6842105263 | #DIV/0! |
| MIR1206   | 0.09523809524 | 0.09523809524 | 0.1111111111  |  | 0.6842105263 | #DIV/0! |
| MIR1207   | 0.09523809524 | 0.09523809524 | 0.1111111111  |  | 0.6842105263 | #DIV/0! |
| MIR1208   | 0.09523809524 | 0.09523809524 | 0.1111111111  |  | 0.6842105263 | #DIV/0! |
| MIR1220   | 0.09523809524 | 0.09523809524 | 0             |  | inf          | #DIV/0! |
| MIR1224   | 0.1428571429  | 0.1428571429  | 0.05555555556 |  | 2.333333333  | #DIV/0! |
| MIR1225   | 0.09523809524 | 0.09523809524 | 0.2222222222  |  | 0.2894736842 | #DIV/0! |
| MIR1226   | 0.09523809524 | 0.09523809524 | 0             |  | inf          | #DIV/0! |
| MIR1227   | 0.09523809524 | 0.09523809524 | 0.1111111111  |  | 0.6842105263 | #DIV/0! |
| MIR1228   | 0.1428571429  | 0.1428571429  | 0.05555555556 |  | 2.333333333  | #DIV/0! |
| MIR1229   | 0.09523809524 | 0.09523809524 | 0.05555555556 |  | 1.473684211  | #DIV/0! |
| MIR1231   | 0.1428571429  | 0.1428571429  | 0             |  | inf          | #DIV/0! |
| MIR1234   | 0.04761904762 | 0.04761904762 | 0             |  | inf          | #DIV/0! |
| MIR1236   | 0.04761904762 | 0.04761904762 | 0             |  | inf          | #DIV/0! |
| MIR1238   | 0.1428571429  | 0.1428571429  | 0.1111111111  |  | 1.083333333  | #DIV/0! |
| MIR124-   | 0.09523809524 | 0.09523809524 | 0.1111111111  |  | 0.6842105263 | #DIV/0! |
| MIR124-   | 0.1428571429  | 0.1428571429  | 0.1666666667  |  | 0.6666666667 | #DIV/0! |
| MIR124-21 | 0.1428571429  | 0.1428571429  | 0.1666666667  |  | 0.6666666667 | #DIV/0! |
| MIR124-   | 0.1428571429  | 0.1428571429  | 0.2222222222  |  | 0.4583333333 | #DIV/0! |
| MIR1243   | 0             | 0             | 0.05555555556 |  | 0            | #DIV/0! |
| MIR1244-  | 0.09523809524 | 0.09523809524 | 0.1666666667  |  | 0.4210526316 | #DIV/0! |
| MIR1244-  | 0.09523809524 | 0.09523809524 | 0.1666666667  |  | 0.4210526316 | #DIV/0! |
| MIR1244-  | 0.09523809524 | 0.09523809524 | 0.1666666667  |  | 0.4210526316 | #DIV/0! |
| MIR1244-  | 0.09523809524 | 0.09523809524 | 0.1666666667  |  | 0.4210526316 | #DIV/0! |
| MIR1245   | 0             | 0             | 0.1666666667  |  | 0            | #DIV/0! |
| MIR1245   | 0             | 0             | 0.1666666667  |  | 0            | #DIV/0! |
| MIR1246   | 0             | 0             | 0.1111111111  |  | 0            | #DIV/0! |
| MIR1248   | 0.09523809524 | 0.09523809524 | 0.05555555556 |  | 1.473684211  | #DIV/0! |
| MIR1249   | 0             | 0             | 0.1111111111  |  | 0            | #DIV/0! |
| MIR1250   | 0.04761904762 | 0.04761904762 | 0             |  | inf          | #DIV/0! |
| MIR1251   | 0.1904761905  | 0.1904761905  | 0.05555555556 |  | 3.294117647  | #DIV/0! |
| MIR1252   | 0.04761904762 | 0.04761904762 | 0             |  | inf          | #DIV/0! |
| MIR1253   | 0             | 0             | 0.1111111111  |  | 0            | #DIV/0! |
| MIR1255   | 0             | 0             | 0.05555555556 |  | 0            | #DIV/0! |
| MIR12551  | 0.1428571429  | 0.1428571429  | 0             |  | inf          | #DIV/0! |
| MIR1256   | 0.04761904762 | 0.04761904762 | 0.1111111111  |  | 0.325        | #DIV/0! |
| MIR1257   | 0.1428571429  | 0.1428571429  | 0.1111111111  |  | 1.083333333  | #DIV/0! |
| MIR1258   | 0             | 0             | 0.05555555556 |  | 0            | #DIV/0! |
| MIR125B   | 0.04761904762 | 0.04761904762 | 0.1111111111  |  | 0.325        | #DIV/0! |
| MIR126    | 0.1428571429  | 0.1428571429  | 0.05555555556 |  | 2.333333333  | #DIV/0! |
| MIR1262   | 0.04761904762 | 0.04761904762 | 0.05555555556 |  | 0.7          | #DIV/0! |
| MIR1263   | 0.1428571429  | 0.1428571429  | 0.05555555556 |  | 2.333333333  | #DIV/0! |
| MIR1265   | 0.09523809524 | 0.09523809524 | 0.1111111111  |  | 0.6842105263 | #DIV/0! |
| MIR1266   | 0.04761904762 | 0.04761904762 | 0.05555555556 |  | 0.7          | #DIV/0! |
| MIR1268   | 0.380952381   | 0.380952381   | 0.3333333333  |  | 0.9230769231 | #DIV/0! |
| MIR1268   | 0.04761904762 | 0.04761904762 | 0             |  | inf          | #DIV/0! |
| MIR1269   | 0.04761904762 | 0.04761904762 | 0.05555555556 |  | 0.7          | #DIV/0! |
| MIR1269   | 0.04761904762 | 0.04761904762 | 0.1111111111  |  | 0.325        | #DIV/0! |



|          |               |               |               |  |              |         |
|----------|---------------|---------------|---------------|--|--------------|---------|
| MIR1270  | 0.1428571429  | 0.1428571429  | 0             |  | inf          | #DIV/0! |
| MIR1271  | 0.09523809524 | 0.09523809524 | 0.05555555556 |  | 1.473684211  | #DIV/0! |
| MIR1272  | 0.04761904762 | 0.04761904762 | 0.05555555556 |  | 0.7          | #DIV/0! |
| MIR1273  | 0.04761904762 | 0.04761904762 | 0             |  | inf          | #DIV/0! |
| MIR1275  | 0.04761904762 | 0.04761904762 | 0             |  | inf          | #DIV/0! |
| MIR1276  | 0.09523809524 | 0.09523809524 | 0.05555555556 |  | 1.473684211  | #DIV/0! |
| MIR1279  | 0.09523809524 | 0.09523809524 | 0.1111111111  |  | 0.6842105263 | #DIV/0! |
| MIR128-  | 0.04761904762 | 0.04761904762 | 0.05555555556 |  | 0.7          | #DIV/0! |
| MIR128-  | 0.04761904762 | 0.04761904762 | 0             |  | inf          | #DIV/0! |
| MIR1281  | 0             | 0             | 0.1111111111  |  | 0            | #DIV/0! |
| MIR1283  | 0.09523809524 | 0.09523809524 | 0.05555555556 |  | 1.473684211  | #DIV/0! |
| MIR1283- | 0.09523809524 | 0.09523809524 | 0.05555555556 |  | 1.473684211  | #DIV/0! |
| MIR1284  | 0.04761904762 | 0.04761904762 | 0             |  | inf          | #DIV/0! |
| MIR1285  | 0.04761904762 | 0.04761904762 | 0.1111111111  |  | 0.325        | #DIV/0! |
| MIR1285- | 0             | 0             | 0.05555555556 |  | 0            | #DIV/0! |
| MIR1286  | 0.04761904762 | 0.04761904762 | 0.05555555556 |  | 0.7          | #DIV/0! |
| MIR1287  | 0.1428571429  | 0.1428571429  | 0             |  | inf          | #DIV/0! |
| MIR1289  | 0.09523809524 | 0.09523809524 | 0.1111111111  |  | 0.6842105263 | #DIV/0! |
| MIR1289- | 0.04761904762 | 0.04761904762 | 0             |  | inf          | #DIV/0! |
| MIR129-  | 0.04761904762 | 0.04761904762 | 0.05555555556 |  | 0.7          | #DIV/0! |
| MIR1290  | 0.04761904762 | 0.04761904762 | 0.1111111111  |  | 0.325        | #DIV/0! |
| MIR1291  | 0.04761904762 | 0.04761904762 | 0.05555555556 |  | 0.7          | #DIV/0! |
| MIR1292  | 0.1904761905  | 0.1904761905  | 0.05555555556 |  | 3.294117647  | #DIV/0! |
| MIR1293  | 0.09523809524 | 0.09523809524 | 0.05555555556 |  | 1.473684211  | #DIV/0! |
| MIR1295  | 0.1428571429  | 0.1428571429  | 0.05555555556 |  | 2.333333333  | #DIV/0! |
| MIR1295- | 0.1428571429  | 0.1428571429  | 0.05555555556 |  | 2.333333333  | #DIV/0! |
| MIR1296  | 0.09523809524 | 0.09523809524 | 0.1111111111  |  | 0.6842105263 | #DIV/0! |
| MIR1299  | 0.09523809524 | 0.09523809524 | 0.2222222222  |  | 0.2894736842 | #DIV/0! |
| MIR1302- | 0             | 0             | 0.05555555556 |  | 0            | #DIV/0! |
| MIR1302- | 0.1428571429  | 0.1428571429  | 0.2777777778  |  | 0.3333333333 | #DIV/0! |
| MIR1302- | 0.1428571429  | 0.1428571429  | 0.2777777778  |  | 0.3333333333 | #DIV/0! |
| MIR1302- | 0.1428571429  | 0.1428571429  | 0.2777777778  |  | 0.3333333333 | #DIV/0! |
| MIR1302- | 0             | 0             | 0.05555555556 |  | 0            | #DIV/0! |
| MIR1302- | 0             | 0             | 0.05555555556 |  | 0            | #DIV/0! |
| MIR1302- | 0.09523809524 | 0.09523809524 | 0.1666666667  |  | 0.4210526316 | #DIV/0! |
| MIR1302- | 0.04761904762 | 0.04761904762 | 0.2222222222  |  | 0.1375       | #DIV/0! |
| MIR1302- | 0.04761904762 | 0.04761904762 | 0.1666666667  |  | 0.2          | #DIV/0! |
| MIR1302- | 0.04761904762 | 0.04761904762 | 0             |  | inf          | #DIV/0! |
| MIR1302- | 0.1428571429  | 0.1428571429  | 0.2777777778  |  | 0.3333333333 | #DIV/0! |
| MIR1303  | 0             | 0             | 0.05555555556 |  | 0            | #DIV/0! |
| MIR1305  | 0             | 0             | 0.05555555556 |  | 0            | #DIV/0! |
| MIR1306  | 0.04761904762 | 0.04761904762 | 0.05555555556 |  | 0.7          | #DIV/0! |
| MIR1307  | 0.1428571429  | 0.1428571429  | 0.05555555556 |  | 2.333333333  | #DIV/0! |
| MIR1308  | 0.04761904762 | 0.04761904762 | 0.05555555556 |  | 0.7          | #DIV/0! |
| MIR132   | 0             | 0             | 0.1111111111  |  | 0            | #DIV/0! |
| MIR1322  | 0.09523809524 | 0.09523809524 | 0.1111111111  |  | 0.6842105263 | #DIV/0! |
| MIR1323  | 0.09523809524 | 0.09523809524 | 0.05555555556 |  | 1.473684211  | #DIV/0! |
| MIR1324  | 0.04761904762 | 0.04761904762 | 0             |  | inf          | #DIV/0! |
| MIR133A  | 0.04761904762 | 0.04761904762 | 0.1111111111  |  | 0.325        | #DIV/0! |
| MIR133A1 | 0.04761904762 | 0.04761904762 | 0.1111111111  |  | 0.325        | #DIV/0! |
| MIR133A  | 0.1428571429  | 0.1428571429  | 0.2222222222  |  | 0.4583333333 | #DIV/0! |

|         |               |               |               |  |              |         |
|---------|---------------|---------------|---------------|--|--------------|---------|
| MIR133I | 0.04761904762 | 0.04761904762 | 0             |  | inf          | #DIV/0! |
| IIR135A | 0.1904761905  | 0.1904761905  | 0.05555555556 |  | 3.294117647  | #DIV/0! |
| MIR135I | 0.1904761905  | 0.1904761905  | 0             |  | inf          | #DIV/0! |
| MIR137I | 0.04761904762 | 0.04761904762 | 0.05555555556 |  | 0.7          | #DIV/0! |
| IR137H  | 0.04761904762 | 0.04761904762 | 0.05555555556 |  | 0.7          | #DIV/0! |
| IIR138- | 0.04761904762 | 0.04761904762 | 0             |  | inf          | #DIV/0! |
| IIR138- | 0.04761904762 | 0.04761904762 | 0             |  | inf          | #DIV/0! |
| MIR140I | 0.1428571429  | 0.1428571429  | 0.05555555556 |  | 2.333333333  | #DIV/0! |
| MIR141I | 0.04761904762 | 0.04761904762 | 0.1111111111  |  | 0.325        | #DIV/0! |
| MIR142I | 0.09523809524 | 0.09523809524 | 0             |  | inf          | #DIV/0! |
| MIR144I | 0.04761904762 | 0.04761904762 | 0.05555555556 |  | 0.7          | #DIV/0! |
| MIR146I | 0.04761904762 | 0.04761904762 | 0.05555555556 |  | 0.7          | #DIV/0! |
| IIR146A | 0.04761904762 | 0.04761904762 | 0.05555555556 |  | 0.7          | #DIV/0! |
| MIR146I | 0.1428571429  | 0.1428571429  | 0.05555555556 |  | 2.333333333  | #DIV/0! |
| MIR147I | 0             | 0             | 0.05555555556 |  | 0            | #DIV/0! |
| IIR147A | 0.04761904762 | 0.04761904762 | 0             |  | inf          | #DIV/0! |
| MIR147I | 0.04761904762 | 0.04761904762 | 0             |  | inf          | #DIV/0! |
| IIR148A | 0.04761904762 | 0.04761904762 | 0.2222222222  |  | 0.1375       | #DIV/0! |
| MIR148I | 0.04761904762 | 0.04761904762 | 0.05555555556 |  | 0.7          | #DIV/0! |
| MIR149I | 0.04761904762 | 0.04761904762 | 0.05555555556 |  | 0.7          | #DIV/0! |
| MIR150I | 0.09523809524 | 0.09523809524 | 0.1111111111  |  | 0.6842105263 | #DIV/0! |
| IIR151A | 0.04761904762 | 0.04761904762 | 0.2222222222  |  | 0.1375       | #DIV/0! |
| MIR152I | 0.1428571429  | 0.1428571429  | 0             |  | inf          | #DIV/0! |
| IIR153- | 0.1428571429  | 0.1428571429  | 0.05555555556 |  | 2.333333333  | #DIV/0! |
| MIR153I | 0.1428571429  | 0.1428571429  | 0.05555555556 |  | 2.333333333  | #DIV/0! |
| MIR153I | 0.1428571429  | 0.1428571429  | 0.05555555556 |  | 2.333333333  | #DIV/0! |
| MIR153I | 0.1428571429  | 0.1428571429  | 0.05555555556 |  | 2.333333333  | #DIV/0! |
| MIR153I | 0.04761904762 | 0.04761904762 | 0             |  | inf          | #DIV/0! |
| MIR155I | 0.04761904762 | 0.04761904762 | 0.1111111111  |  | 0.325        | #DIV/0! |
| IR155H  | 0.04761904762 | 0.04761904762 | 0.1111111111  |  | 0.325        | #DIV/0! |
| MIR15B  | 0.1428571429  | 0.1428571429  | 0.05555555556 |  | 2.333333333  | #DIV/0! |
| MIR16-2 | 0.1428571429  | 0.1428571429  | 0.05555555556 |  | 2.333333333  | #DIV/0! |
| IIR181A | 0.1428571429  | 0.1428571429  | 0.1111111111  |  | 1.083333333  | #DIV/0! |
| R181A1I | 0.1428571429  | 0.1428571429  | 0.1111111111  |  | 1.083333333  | #DIV/0! |
| IIR181A | 0.09523809524 | 0.09523809524 | 0.05555555556 |  | 1.473684211  | #DIV/0! |
| R181A2I | 0.09523809524 | 0.09523809524 | 0.05555555556 |  | 1.473684211  | #DIV/0! |
| IIR181B | 0.1428571429  | 0.1428571429  | 0.1111111111  |  | 1.083333333  | #DIV/0! |
| IIR181B | 0.09523809524 | 0.09523809524 | 0.05555555556 |  | 1.473684211  | #DIV/0! |
| IIR181C | 0.1428571429  | 0.1428571429  | 0.1111111111  |  | 1.083333333  | #DIV/0! |
| IIR181I | 0.1428571429  | 0.1428571429  | 0.1111111111  |  | 1.083333333  | #DIV/0! |
| MIR182I | 0.04761904762 | 0.04761904762 | 0.05555555556 |  | 0.7          | #DIV/0! |
| MIR182I | 0.09523809524 | 0.09523809524 | 0.1111111111  |  | 0.6842105263 | #DIV/0! |
| MIR182I | 0.04761904762 | 0.04761904762 | 0.05555555556 |  | 0.7          | #DIV/0! |
| MIR183I | 0.04761904762 | 0.04761904762 | 0.05555555556 |  | 0.7          | #DIV/0! |
| MIR184I | 0.04761904762 | 0.04761904762 | 0.05555555556 |  | 0.7          | #DIV/0! |
| MIR185I | 0.04761904762 | 0.04761904762 | 0.05555555556 |  | 0.7          | #DIV/0! |
| MIR186I | 0.04761904762 | 0.04761904762 | 0.05555555556 |  | 0.7          | #DIV/0! |
| MIR187I | 0.09523809524 | 0.09523809524 | 0             |  | inf          | #DIV/0! |
| MIR190I | 0.09523809524 | 0.09523809524 | 0.1111111111  |  | 0.6842105263 | #DIV/0! |
| IIR190A | 0.04761904762 | 0.04761904762 | 0.05555555556 |  | 0.7          | #DIV/0! |
| MIR190I | 0.1904761905  | 0.1904761905  | 0.05555555556 |  | 3.294117647  | #DIV/0! |
| MIR191I | 0.09523809524 | 0.09523809524 | 0             |  | inf          | #DIV/0! |

|          |               |               |               |  |              |         |
|----------|---------------|---------------|---------------|--|--------------|---------|
| MIR191C  | 0.04761904762 | 0.04761904762 | 0             |  | inf          | #DIV/0! |
| MIR1914  | 0.1428571429  | 0.1428571429  | 0.2222222222  |  | 0.4583333333 | #DIV/0! |
| MIR1915  | 0.09523809524 | 0.09523809524 | 0.1111111111  |  | 0.6842105263 | #DIV/0! |
| MIR193A  | 0             | 0             | 0             |  |              | #DIV/0! |
| MIR193B  | 0.04761904762 | 0.04761904762 | 0             |  | inf          | #DIV/0! |
| MIR193H  | 0.04761904762 | 0.04761904762 | 0             |  | inf          | #DIV/0! |
| MIR194-  | 0.1428571429  | 0.1428571429  | 0.05555555556 |  | 2.333333333  | #DIV/0! |
| MIR195   | 0             | 0             | 0.05555555556 |  | 0            | #DIV/0! |
| MIR196A  | 0.1428571429  | 0.1428571429  | 0             |  | inf          | #DIV/0! |
| MIR196B  | 0.04761904762 | 0.04761904762 | 0.05555555556 |  | 0.7          | #DIV/0! |
| MIR196H  | 0.04761904762 | 0.04761904762 | 0.2222222222  |  | 0.1375       | #DIV/0! |
| MIR197   | 0.04761904762 | 0.04761904762 | 0.05555555556 |  | 0.7          | #DIV/0! |
| MIR1972- | 0.1428571429  | 0.1428571429  | 0.05555555556 |  | 2.333333333  | #DIV/0! |
| MIR1972H | 0.1428571429  | 0.1428571429  | 0.05555555556 |  | 2.333333333  | #DIV/0! |
| MIR1973  | 0             | 0             | 0.05555555556 |  | 0            | #DIV/0! |
| MIR197C  | 0.04761904762 | 0.04761904762 | 0.1111111111  |  | 0.325        | #DIV/0! |
| MIR198   | 0.09523809524 | 0.09523809524 | 0.05555555556 |  | 1.473684211  | #DIV/0! |
| MIR199A  | 0.1428571429  | 0.1428571429  | 0.1111111111  |  | 1.083333333  | #DIV/0! |
| MIR199B  | 0.1428571429  | 0.1428571429  | 0.05555555556 |  | 2.333333333  | #DIV/0! |
| MIR199H  | 0.09523809524 | 0.09523809524 | 0.05555555556 |  | 1.473684211  | #DIV/0! |
| MIR200A  | 0             | 0             | 0.1111111111  |  | 0            | #DIV/0! |
| MIR200B  | 0             | 0             | 0.1111111111  |  | 0            | #DIV/0! |
| MIR200C  | 0.04761904762 | 0.04761904762 | 0.1111111111  |  | 0.325        | #DIV/0! |
| MIR200H  | 0.04761904762 | 0.04761904762 | 0.1111111111  |  | 0.325        | #DIV/0! |
| MIR202   | 0.1904761905  | 0.1904761905  | 0             |  | inf          | #DIV/0! |
| MIR202H  | 0.1904761905  | 0.1904761905  | 0             |  | inf          | #DIV/0! |
| MIR204   | 0             | 0             | 0.05555555556 |  | 0            | #DIV/0! |
| MIR205   | 0.1428571429  | 0.1428571429  | 0             |  | inf          | #DIV/0! |
| MIR2052  | 0.1904761905  | 0.1904761905  | 0.1111111111  |  | 1.529411765  | #DIV/0! |
| MIR2052H | 0.1904761905  | 0.1904761905  | 0.1111111111  |  | 1.529411765  | #DIV/0! |
| MIR2053  | 0.1904761905  | 0.1904761905  | 0.1111111111  |  | 1.529411765  | #DIV/0! |
| MIR2054  | 0             | 0             | 0.05555555556 |  | 0            | #DIV/0! |
| MIR205H  | 0.1428571429  | 0.1428571429  | 0             |  | inf          | #DIV/0! |
| MIR206   | 0.04761904762 | 0.04761904762 | 0             |  | inf          | #DIV/0! |
| MIR208A  | 0             | 0             | 0.05555555556 |  | 0            | #DIV/0! |
| MIR208B  | 0             | 0             | 0.05555555556 |  | 0            | #DIV/0! |
| MIR21    | 0.1428571429  | 0.1428571429  | 0             |  | inf          | #DIV/0! |
| MIR210   | 0.04761904762 | 0.04761904762 | 0             |  | inf          | #DIV/0! |
| MIR210H  | 0.04761904762 | 0.04761904762 | 0             |  | inf          | #DIV/0! |
| MIR211C  | 0.1428571429  | 0.1428571429  | 0.05555555556 |  | 2.333333333  | #DIV/0! |
| MIR2115  | 0.09523809524 | 0.09523809524 | 0             |  | inf          | #DIV/0! |
| MIR211C  | 0.04761904762 | 0.04761904762 | 0.05555555556 |  | 0.7          | #DIV/0! |
| MIR2117  | 0.04761904762 | 0.04761904762 | 0             |  | inf          | #DIV/0! |
| MIR2117H | 0.04761904762 | 0.04761904762 | 0             |  | inf          | #DIV/0! |
| MIR212   | 0             | 0             | 0.1111111111  |  | 0            | #DIV/0! |
| MIR214   | 0.1428571429  | 0.1428571429  | 0.05555555556 |  | 2.333333333  | #DIV/0! |
| MIR215   | 0.1428571429  | 0.1428571429  | 0.05555555556 |  | 2.333333333  | #DIV/0! |
| MIR216A  | 0.04761904762 | 0.04761904762 | 0.05555555556 |  | 0.7          | #DIV/0! |
| MIR216B  | 0.04761904762 | 0.04761904762 | 0.05555555556 |  | 0.7          | #DIV/0! |
| MIR217   | 0.04761904762 | 0.04761904762 | 0.05555555556 |  | 0.7          | #DIV/0! |
| MIR217H  | 0.04761904762 | 0.04761904762 | 0.05555555556 |  | 0.7          | #DIV/0! |

|          |               |               |                |  |              |         |
|----------|---------------|---------------|----------------|--|--------------|---------|
| MIR218-  | 0             | 0             | 0.055555555556 |  | 0            | #DIV/0! |
| MIR219A  | 0.04761904762 | 0.04761904762 | 0              |  | inf          | #DIV/0! |
| MIR219A  | 0.09523809524 | 0.09523809524 | 0.055555555556 |  | 1.473684211  | #DIV/0! |
| MIR219B  | 0.09523809524 | 0.09523809524 | 0.055555555556 |  | 1.473684211  | #DIV/0! |
| MIR22    | 0             | 0             | 0.1111111111   |  | 0            | #DIV/0! |
| MIR227   | 0.04761904762 | 0.04761904762 | 0              |  | inf          | #DIV/0! |
| MIR2278  | 0.04761904762 | 0.04761904762 | 0.055555555556 |  | 0.7          | #DIV/0! |
| MIR22H   | 0             | 0             | 0.1111111111   |  | 0            | #DIV/0! |
| MIR235   | 0             | 0             | 0.055555555556 |  | 0            | #DIV/0! |
| MIR23A   | 0.1428571429  | 0.1428571429  | 0.1111111111   |  | 1.083333333  | #DIV/0! |
| MIR23B   | 0.04761904762 | 0.04761904762 | 0.055555555556 |  | 0.7          | #DIV/0! |
| MIR24-1  | 0.04761904762 | 0.04761904762 | 0.055555555556 |  | 0.7          | #DIV/0! |
| MIR24-2  | 0.1428571429  | 0.1428571429  | 0.1111111111   |  | 1.083333333  | #DIV/0! |
| MIR246   | 0             | 0             | 0.055555555556 |  | 0            | #DIV/0! |
| MIR25    | 0.04761904762 | 0.04761904762 | 0.055555555556 |  | 0.7          | #DIV/0! |
| MIR268   | 0.04761904762 | 0.04761904762 | 0.055555555556 |  | 0.7          | #DIV/0! |
| MIR26A   | 0.04761904762 | 0.04761904762 | 0              |  | inf          | #DIV/0! |
| MIR26A   | 0.1428571429  | 0.1428571429  | 0.055555555556 |  | 2.333333333  | #DIV/0! |
| MIR26B   | 0             | 0             | 0.055555555556 |  | 0            | #DIV/0! |
| MIR27A   | 0.1428571429  | 0.1428571429  | 0.1111111111   |  | 1.083333333  | #DIV/0! |
| MIR27B   | 0.04761904762 | 0.04761904762 | 0.055555555556 |  | 0.7          | #DIV/0! |
| MIR28    | 0.09523809524 | 0.09523809524 | 0.1111111111   |  | 0.6842105263 | #DIV/0! |
| MIR286   | 0.09523809524 | 0.09523809524 | 0.055555555556 |  | 1.473684211  | #DIV/0! |
| MIR290   | 0.04761904762 | 0.04761904762 | 0              |  | inf          | #DIV/0! |
| MIR296   | 0.1428571429  | 0.1428571429  | 0.2222222222   |  | 0.4583333333 | #DIV/0! |
| MIR297   | 0             | 0             | 0.055555555556 |  | 0            | #DIV/0! |
| MIR298   | 0.1428571429  | 0.1428571429  | 0.2222222222   |  | 0.4583333333 | #DIV/0! |
| MIR29A   | 0.04761904762 | 0.04761904762 | 0.055555555556 |  | 0.7          | #DIV/0! |
| MIR29B   | 0.04761904762 | 0.04761904762 | 0.055555555556 |  | 0.7          | #DIV/0! |
| MIR29B   | 0.1428571429  | 0.1428571429  | 0              |  | inf          | #DIV/0! |
| MIR29B2C | 0.1428571429  | 0.1428571429  | 0              |  | inf          | #DIV/0! |
| MIR29C   | 0.1428571429  | 0.1428571429  | 0              |  | inf          | #DIV/0! |
| MIR301A  | 0.1428571429  | 0.1428571429  | 0              |  | inf          | #DIV/0! |
| MIR301B  | 0.04761904762 | 0.04761904762 | 0.055555555556 |  | 0.7          | #DIV/0! |
| MIR302A  | 0             | 0             | 0.055555555556 |  | 0            | #DIV/0! |
| MIR302B  | 0             | 0             | 0.055555555556 |  | 0            | #DIV/0! |
| MIR302C  | 0             | 0             | 0.055555555556 |  | 0            | #DIV/0! |
| MIR302E  | 0             | 0             | 0.055555555556 |  | 0            | #DIV/0! |
| MIR302F  | 0             | 0             | 0.055555555556 |  | 0            | #DIV/0! |
| MIR302H  | 0.04761904762 | 0.04761904762 | 0              |  | inf          | #DIV/0! |
| MIR302I  | 0.09523809524 | 0.09523809524 | 0              |  | inf          | #DIV/0! |
| MIR306   | 0.04761904762 | 0.04761904762 | 0              |  | inf          | #DIV/0! |
| MIR3065  | 0.04761904762 | 0.04761904762 | 0              |  | inf          | #DIV/0! |
| MIR307   | 0.04761904762 | 0.04761904762 | 0.055555555556 |  | 0.7          | #DIV/0! |
| MIR30B   | 0.04761904762 | 0.04761904762 | 0.2222222222   |  | 0.1375       | #DIV/0! |
| MIR30C   | 0.04761904762 | 0.04761904762 | 0.055555555556 |  | 0.7          | #DIV/0! |
| MIR30D   | 0.04761904762 | 0.04761904762 | 0.2222222222   |  | 0.1375       | #DIV/0! |
| MIR30E   | 0.04761904762 | 0.04761904762 | 0.055555555556 |  | 0.7          | #DIV/0! |
| MIR31    | 0.09523809524 | 0.09523809524 | 0.1111111111   |  | 0.6842105263 | #DIV/0! |
| MIR3115  | 0.04761904762 | 0.04761904762 | 0.1111111111   |  | 0.325        | #DIV/0! |
| MIR3116  | 0.04761904762 | 0.04761904762 | 0.055555555556 |  | 0.7          | #DIV/0! |

|         |               |               |               |  |              |         |
|---------|---------------|---------------|---------------|--|--------------|---------|
| IIR3116 | 0.04761904762 | 0.04761904762 | 0.05555555556 |  | 0.7          | #DIV/0! |
| MIR3117 | 0.04761904762 | 0.04761904762 | 0.05555555556 |  | 0.7          | #DIV/0! |
| IIR3118 | 0.04761904762 | 0.04761904762 | 0             |  | inf          | #DIV/0! |
| IIR3118 | 0.2857142857  | 0.2857142857  | 0.1111111111  |  | 2.6          | #DIV/0! |
| IIR3118 | 0.2857142857  | 0.2857142857  | 0.1111111111  |  | 2.6          | #DIV/0! |
| IIR3118 | 0.2857142857  | 0.2857142857  | 0.1111111111  |  | 2.6          | #DIV/0! |
| IIR3119 | 0.1428571429  | 0.1428571429  | 0.05555555556 |  | 2.333333333  | #DIV/0! |
| IIR3119 | 0.1428571429  | 0.1428571429  | 0.05555555556 |  | 2.333333333  | #DIV/0! |
| MIR3120 | 0.1428571429  | 0.1428571429  | 0.05555555556 |  | 2.333333333  | #DIV/0! |
| MIR3121 | 0.1428571429  | 0.1428571429  | 0             |  | inf          | #DIV/0! |
| MIR3122 | 0.1428571429  | 0.1428571429  | 0             |  | inf          | #DIV/0! |
| MIR3123 | 0.1428571429  | 0.1428571429  | 0             |  | inf          | #DIV/0! |
| MIR3124 | 0.1428571429  | 0.1428571429  | 0             |  | inf          | #DIV/0! |
| MIR3125 | 0             | 0             | 0.05555555556 |  | 0            | #DIV/0! |
| MIR3126 | 0             | 0             | 0.05555555556 |  | 0            | #DIV/0! |
| MIR3127 | 0             | 0             | 0.1111111111  |  | 0            | #DIV/0! |
| MIR3128 | 0             | 0             | 0.1111111111  |  | 0            | #DIV/0! |
| MIR3129 | 0             | 0             | 0.1666666667  |  | 0            | #DIV/0! |
| IIR3130 | 0             | 0             | 0.05555555556 |  | 0            | #DIV/0! |
| IIR3130 | 0             | 0             | 0.05555555556 |  | 0            | #DIV/0! |
| MIR3131 | 0             | 0             | 0.05555555556 |  | 0            | #DIV/0! |
| MIR3132 | 0             | 0             | 0.05555555556 |  | 0            | #DIV/0! |
| MIR3133 | 0             | 0             | 0.05555555556 |  | 0            | #DIV/0! |
| MIR3134 | 0.04761904762 | 0.04761904762 | 0             |  | inf          | #DIV/0! |
| IIR3135 | 0.04761904762 | 0.04761904762 | 0             |  | inf          | #DIV/0! |
| IIR3135 | 0.04761904762 | 0.04761904762 | 0             |  | inf          | #DIV/0! |
| MIR3136 | 0.04761904762 | 0.04761904762 | 0             |  | inf          | #DIV/0! |
| MIR3137 | 0.09523809524 | 0.09523809524 | 0.05555555556 |  | 1.473684211  | #DIV/0! |
| MIR3139 | 0             | 0             | 0.05555555556 |  | 0            | #DIV/0! |
| MIR3140 | 0             | 0             | 0.05555555556 |  | 0            | #DIV/0! |
| MIR3141 | 0             | 0             | 0.05555555556 |  | 0            | #DIV/0! |
| MIR3142 | 0.04761904762 | 0.04761904762 | 0.05555555556 |  | 0.7          | #DIV/0! |
| IIR3142 | 0.04761904762 | 0.04761904762 | 0.05555555556 |  | 0.7          | #DIV/0! |
| MIR3146 | 0.04761904762 | 0.04761904762 | 0.2222222222  |  | 0.1375       | #DIV/0! |
| MIR3147 | 0.1428571429  | 0.1428571429  | 0.1666666667  |  | 0.6666666667 | #DIV/0! |
| MIR3148 | 0.04761904762 | 0.04761904762 | 0.1111111111  |  | 0.325        | #DIV/0! |
| MIR3149 | 0.1904761905  | 0.1904761905  | 0.1111111111  |  | 1.529411765  | #DIV/0! |
| IIR3150 | 0.1904761905  | 0.1904761905  | 0.1111111111  |  | 1.529411765  | #DIV/0! |
| IIR3150 | 0.1904761905  | 0.1904761905  | 0.1111111111  |  | 1.529411765  | #DIV/0! |
| R3150B  | 0.1904761905  | 0.1904761905  | 0.1111111111  |  | 1.529411765  | #DIV/0! |
| MIR3151 | 0.1904761905  | 0.1904761905  | 0.1111111111  |  | 1.529411765  | #DIV/0! |
| MIR3152 | 0.04761904762 | 0.04761904762 | 0.05555555556 |  | 0.7          | #DIV/0! |
| MIR3153 | 0             | 0             | 0.05555555556 |  | 0            | #DIV/0! |
| MIR3154 | 0.09523809524 | 0.09523809524 | 0.05555555556 |  | 1.473684211  | #DIV/0! |
| IIR3155 | 0.09523809524 | 0.09523809524 | 0.1111111111  |  | 0.6842105263 | #DIV/0! |
| IIR3155 | 0.09523809524 | 0.09523809524 | 0.1111111111  |  | 0.6842105263 | #DIV/0! |
| IIR3156 | 0.1428571429  | 0.1428571429  | 0.05555555556 |  | 2.333333333  | #DIV/0! |
| IIR3156 | 0.09523809524 | 0.09523809524 | 0.05555555556 |  | 1.473684211  | #DIV/0! |
| IIR3156 | 0.04761904762 | 0.04761904762 | 0             |  | inf          | #DIV/0! |
| MIR3157 | 0.1428571429  | 0.1428571429  | 0             |  | inf          | #DIV/0! |
| IIR3158 | 0.1428571429  | 0.1428571429  | 0             |  | inf          | #DIV/0! |

|         |               |               |               |  |              |         |
|---------|---------------|---------------|---------------|--|--------------|---------|
| IIR3158 | 0.1428571429  | 0.1428571429  | 0             |  | inf          | #DIV/0! |
| IIR3160 | 0             | 0             | 0.05555555556 |  | 0            | #DIV/0! |
| IIR3160 | 0             | 0             | 0.05555555556 |  | 0            | #DIV/0! |
| MIR3161 | 0             | 0             | 0.05555555556 |  | 0            | #DIV/0! |
| MIR3174 | 0.04761904762 | 0.04761904762 | 0.05555555556 |  | 0.7          | #DIV/0! |
| MIR3175 | 0.04761904762 | 0.04761904762 | 0.05555555556 |  | 0.7          | #DIV/0! |
| MIR3176 | 0.04761904762 | 0.04761904762 | 0.2222222222  |  | 0.1375       | #DIV/0! |
| MIR3177 | 0.09523809524 | 0.09523809524 | 0.2222222222  |  | 0.2894736842 | #DIV/0! |
| MIR3178 | 0.04761904762 | 0.04761904762 | 0.1111111111  |  | 0.325        | #DIV/0! |
| IIR3179 | 0.09523809524 | 0.09523809524 | 0             |  | inf          | #DIV/0! |
| IIR3179 | 0.09523809524 | 0.09523809524 | 0             |  | inf          | #DIV/0! |
| IIR3179 | 0.09523809524 | 0.09523809524 | 0             |  | inf          | #DIV/0! |
| IIR3179 | 0.09523809524 | 0.09523809524 | 0             |  | inf          | #DIV/0! |
| IIR3180 | 0.09523809524 | 0.09523809524 | 0             |  | inf          | #DIV/0! |
| IIR3180 | 0.09523809524 | 0.09523809524 | 0             |  | inf          | #DIV/0! |
| IIR3180 | 0.09523809524 | 0.09523809524 | 0             |  | inf          | #DIV/0! |
| IIR3180 | 0.04761904762 | 0.04761904762 | 0             |  | inf          | #DIV/0! |
| IIR3180 | 0.09523809524 | 0.09523809524 | 0.2222222222  |  | 0.2894736842 | #DIV/0! |
| MIR3181 | 0.04761904762 | 0.04761904762 | 0             |  | inf          | #DIV/0! |
| MIR3182 | 0.04761904762 | 0.04761904762 | 0             |  | inf          | #DIV/0! |
| MIR3183 | 0             | 0             | 0.1111111111  |  | 0            | #DIV/0! |
| MIR3184 | 0             | 0             | 0.05555555556 |  | 0            | #DIV/0! |
| MIR3185 | 0.1428571429  | 0.1428571429  | 0             |  | inf          | #DIV/0! |
| MIR3186 | 0.04761904762 | 0.04761904762 | 0             |  | inf          | #DIV/0! |
| MIR3187 | 0.09523809524 | 0.09523809524 | 0.1111111111  |  | 0.6842105263 | #DIV/0! |
| MIR3188 | 0.1428571429  | 0.1428571429  | 0.1111111111  |  | 1.083333333  | #DIV/0! |
| MIR3189 | 0.1428571429  | 0.1428571429  | 0.1111111111  |  | 1.083333333  | #DIV/0! |
| MIR3190 | 0.09523809524 | 0.09523809524 | 0.1111111111  |  | 0.6842105263 | #DIV/0! |
| MIR3191 | 0.09523809524 | 0.09523809524 | 0.1111111111  |  | 0.6842105263 | #DIV/0! |
| MIR3192 | 0.1904761905  | 0.1904761905  | 0.05555555556 |  | 3.294117647  | #DIV/0! |
| MIR3193 | 0.09523809524 | 0.09523809524 | 0.1111111111  |  | 0.6842105263 | #DIV/0! |
| MIR3194 | 0.09523809524 | 0.09523809524 | 0.1666666667  |  | 0.4210526316 | #DIV/0! |
| MIR3195 | 0.1428571429  | 0.1428571429  | 0.2222222222  |  | 0.4583333333 | #DIV/0! |
| MIR3196 | 0.1428571429  | 0.1428571429  | 0.2222222222  |  | 0.4583333333 | #DIV/0! |
| MIR3197 | 0.04761904762 | 0.04761904762 | 0.1111111111  |  | 0.325        | #DIV/0! |
| IIR3198 | 0.04761904762 | 0.04761904762 | 0.05555555556 |  | 0.7          | #DIV/0! |
| IIR3198 | 0.04761904762 | 0.04761904762 | 0.05555555556 |  | 0.7          | #DIV/0! |
| IIR3199 | 0.04761904762 | 0.04761904762 | 0.1111111111  |  | 0.325        | #DIV/0! |
| IIR3199 | 0.04761904762 | 0.04761904762 | 0.1111111111  |  | 0.325        | #DIV/0! |
| IIR31HC | 0.09523809524 | 0.09523809524 | 0.1111111111  |  | 0.6842105263 | #DIV/0! |
| MIR32   | 0.04761904762 | 0.04761904762 | 0.05555555556 |  | 0.7          | #DIV/0! |
| MIR3200 | 0.04761904762 | 0.04761904762 | 0.1111111111  |  | 0.325        | #DIV/0! |
| MIR3201 | 0.04761904762 | 0.04761904762 | 0.1666666667  |  | 0.2          | #DIV/0! |
| IIR320A | 0.09523809524 | 0.09523809524 | 0.1111111111  |  | 0.6842105263 | #DIV/0! |
| IIR320B | 0.04761904762 | 0.04761904762 | 0.05555555556 |  | 0.7          | #DIV/0! |
| IIR320B | 0.1428571429  | 0.1428571429  | 0.05555555556 |  | 2.333333333  | #DIV/0! |
| IIR320C | 0.04761904762 | 0.04761904762 | 0.1111111111  |  | 0.325        | #DIV/0! |
| IIR320C | 0.09523809524 | 0.09523809524 | 0.05555555556 |  | 1.473684211  | #DIV/0! |
| MIR320I | 0.09523809524 | 0.09523809524 | 0.1111111111  |  | 0.6842105263 | #DIV/0! |
| MIR324  | 0             | 0             | 0.05555555556 |  | 0            | #DIV/0! |
| MIR328  | 0.1428571429  | 0.1428571429  | 0.05555555556 |  | 2.333333333  | #DIV/0! |

|        |               |               |               |  |              |         |
|--------|---------------|---------------|---------------|--|--------------|---------|
| MIR330 | 0.09523809524 | 0.09523809524 | 0.1111111111  |  | 0.6842105263 | #DIV/0! |
| MIR331 | 0.04761904762 | 0.04761904762 | 0.05555555556 |  | 0.7          | #DIV/0! |
| MIR335 | 0.04761904762 | 0.04761904762 | 0.05555555556 |  | 0.7          | #DIV/0! |
| MIR338 | 0.04761904762 | 0.04761904762 | 0             |  | inf          | #DIV/0! |
| MIR339 | 0.04761904762 | 0.04761904762 | 0.1666666667  |  | 0.2          | #DIV/0! |
| MIR33A | 0             | 0             | 0.1111111111  |  | 0            | #DIV/0! |
| MIR33B | 0.04761904762 | 0.04761904762 | 0.1111111111  |  | 0.325        | #DIV/0! |
| MIR340 | 0.09523809524 | 0.09523809524 | 0.05555555556 |  | 1.473684211  | #DIV/0! |
| MIR346 | 0.1428571429  | 0.1428571429  | 0.05555555556 |  | 2.333333333  | #DIV/0! |
| MIR34A | 0             | 0             | 0.05555555556 |  | 0            | #DIV/0! |
| IR34AH | 0             | 0             | 0.05555555556 |  | 0            | #DIV/0! |
| MIR352 | 0.04761904762 | 0.04761904762 | 0.05555555556 |  | 0.7          | #DIV/0! |
| MIR359 | 0.09523809524 | 0.09523809524 | 0             |  | inf          | #DIV/0! |
| MIR360 | 0.04761904762 | 0.04761904762 | 0.05555555556 |  | 0.7          | #DIV/0! |
| MIR360 | 0             | 0             | 0.1666666667  |  | 0            | #DIV/0! |
| MIR360 | 0.04761904762 | 0.04761904762 | 0.05555555556 |  | 0.7          | #DIV/0! |
| MIR361 | 0.1904761905  | 0.1904761905  | 0.1666666667  |  | 0.9411764706 | #DIV/0! |
| MIR361 | 0.09523809524 | 0.09523809524 | 0.1666666667  |  | 0.4210526316 | #DIV/0! |
| MIR361 | 0.09523809524 | 0.09523809524 | 0.05555555556 |  | 1.473684211  | #DIV/0! |
| MIR361 | 0.09523809524 | 0.09523809524 | 0             |  | inf          | #DIV/0! |
| MIR361 | 0.04761904762 | 0.04761904762 | 0             |  | inf          | #DIV/0! |
| MIR361 | 0.1428571429  | 0.1428571429  | 0.1666666667  |  | 0.6666666667 | #DIV/0! |
| MIR361 | 0.1428571429  | 0.1428571429  | 0.1666666667  |  | 0.6666666667 | #DIV/0! |
| MIR361 | 0.04761904762 | 0.04761904762 | 0.05555555556 |  | 0.7          | #DIV/0! |
| MIR361 | 0             | 0             | 0.1111111111  |  | 0            | #DIV/0! |
| MIR362 | 0.1428571429  | 0.1428571429  | 0             |  | inf          | #DIV/0! |
| MIR362 | 0.1428571429  | 0.1428571429  | 0.05555555556 |  | 2.333333333  | #DIV/0! |
| IR362  | 0.04761904762 | 0.04761904762 | 0.1111111111  |  | 0.325        | #DIV/0! |
| IR362  | 0.04761904762 | 0.04761904762 | 0.1111111111  |  | 0.325        | #DIV/0! |
| MIR364 | 0.1428571429  | 0.1428571429  | 0.1666666667  |  | 0.6666666667 | #DIV/0! |
| IR364  | 0.04761904762 | 0.04761904762 | 0             |  | inf          | #DIV/0! |
| IR364  | 0.04761904762 | 0.04761904762 | 0             |  | inf          | #DIV/0! |
| MIR364 | 0.04761904762 | 0.04761904762 | 0.1111111111  |  | 0.325        | #DIV/0! |
| MIR365 | 0.04761904762 | 0.04761904762 | 0.05555555556 |  | 0.7          | #DIV/0! |
| MIR365 | 0.04761904762 | 0.04761904762 | 0.05555555556 |  | 0.7          | #DIV/0! |
| MIR365 | 0.04761904762 | 0.04761904762 | 0.05555555556 |  | 0.7          | #DIV/0! |
| MIR365 | 0.04761904762 | 0.04761904762 | 0.05555555556 |  | 0.7          | #DIV/0! |
| MIR365 | 0.04761904762 | 0.04761904762 | 0.05555555556 |  | 0.7          | #DIV/0! |
| MIR365 | 0.04761904762 | 0.04761904762 | 0             |  | inf          | #DIV/0! |
| MIR365 | 0             | 0             | 0.1111111111  |  | 0            | #DIV/0! |
| MIR365 | 0.1428571429  | 0.1428571429  | 0             |  | inf          | #DIV/0! |
| MIR365 | 0.04761904762 | 0.04761904762 | 0.05555555556 |  | 0.7          | #DIV/0! |
| IR365  | 0.04761904762 | 0.04761904762 | 0             |  | inf          | #DIV/0! |
| MIR365 | 0             | 0             | 0             |  |              | #DIV/0! |
| MIR366 | 0.04761904762 | 0.04761904762 | 0             |  | inf          | #DIV/0! |
| MIR366 | 0.04761904762 | 0.04761904762 | 0             |  | inf          | #DIV/0! |
| MIR366 | 0.2380952381  | 0.2380952381  | 0             |  | inf          | #DIV/0! |
| IR366  | 0.2380952381  | 0.2380952381  | 0             |  | inf          | #DIV/0! |
| MIR366 | 0.04761904762 | 0.04761904762 | 0.1111111111  |  | 0.325        | #DIV/0! |
| MIR366 | 0.04761904762 | 0.04761904762 | 0.1666666667  |  | 0.2          | #DIV/0! |
| MIR367 | 0             | 0             | 0.05555555556 |  | 0            | #DIV/0! |
| IR367  | 0.09523809524 | 0.09523809524 | 0             |  | inf          | #DIV/0! |

|          |               |               |               |  |              |         |
|----------|---------------|---------------|---------------|--|--------------|---------|
| IIR3670  | 0.09523809524 | 0.09523809524 | 0             |  | inf          | #DIV/0! |
| IIR3670  | 0.09523809524 | 0.09523809524 | 0             |  | inf          | #DIV/0! |
| IIR3670  | 0.09523809524 | 0.09523809524 | 0             |  | inf          | #DIV/0! |
| MIR3671  | 0.04761904762 | 0.04761904762 | 0.05555555556 |  | 0.7          | #DIV/0! |
| MIR3674  | 0.1428571429  | 0.1428571429  | 0.1111111111  |  | 1.083333333  | #DIV/0! |
| MIR3675  | 0.04761904762 | 0.04761904762 | 0.1111111111  |  | 0.325        | #DIV/0! |
| MIR3677  | 0.09523809524 | 0.09523809524 | 0.2222222222  |  | 0.2894736842 | #DIV/0! |
| MIR3678  | 0.04761904762 | 0.04761904762 | 0.05555555556 |  | 0.7          | #DIV/0! |
| MIR3679  | 0             | 0             | 0.05555555556 |  | 0            | #DIV/0! |
| IIR3680  | 0.04761904762 | 0.04761904762 | 0             |  | inf          | #DIV/0! |
| IIR3680  | 0.04761904762 | 0.04761904762 | 0             |  | inf          | #DIV/0! |
| MIR3681  | 0             | 0             | 0.05555555556 |  | 0            | #DIV/0! |
| IIR3681H | 0             | 0             | 0.05555555556 |  | 0            | #DIV/0! |
| MIR3682  | 0.04761904762 | 0.04761904762 | 0.05555555556 |  | 0.7          | #DIV/0! |
| MIR3683  | 0.04761904762 | 0.04761904762 | 0.1666666667  |  | 0.2          | #DIV/0! |
| MIR3684  | 0             | 0             | 0.05555555556 |  | 0            | #DIV/0! |
| MIR3685  | 0.04761904762 | 0.04761904762 | 0.05555555556 |  | 0.7          | #DIV/0! |
| MIR3686  | 0.04761904762 | 0.04761904762 | 0.1111111111  |  | 0.325        | #DIV/0! |
| IIR3688  | 0             | 0             | 0.05555555556 |  | 0            | #DIV/0! |
| IIR3688  | 0             | 0             | 0.05555555556 |  | 0            | #DIV/0! |
| IIR3689  | 0.04761904762 | 0.04761904762 | 0             |  | inf          | #DIV/0! |
| IIR3689  | 0.04761904762 | 0.04761904762 | 0             |  | inf          | #DIV/0! |
| IIR3689  | 0.04761904762 | 0.04761904762 | 0             |  | inf          | #DIV/0! |
| IIR3689I | 0.04761904762 | 0.04761904762 | 0             |  | inf          | #DIV/0! |
| IIR3689I | 0.04761904762 | 0.04761904762 | 0             |  | inf          | #DIV/0! |
| IIR3689  | 0.04761904762 | 0.04761904762 | 0             |  | inf          | #DIV/0! |
| IIR3689  | 0.04761904762 | 0.04761904762 | 0             |  | inf          | #DIV/0! |
| MIR3713  | 0.04761904762 | 0.04761904762 | 0.05555555556 |  | 0.7          | #DIV/0! |
| MIR3714  | 0.04761904762 | 0.04761904762 | 0             |  | inf          | #DIV/0! |
| IIR371A  | 0.09523809524 | 0.09523809524 | 0.05555555556 |  | 1.473684211  | #DIV/0! |
| MIR371H  | 0.09523809524 | 0.09523809524 | 0.05555555556 |  | 1.473684211  | #DIV/0! |
| MIR372   | 0.09523809524 | 0.09523809524 | 0.05555555556 |  | 1.473684211  | #DIV/0! |
| MIR373   | 0.09523809524 | 0.09523809524 | 0.05555555556 |  | 1.473684211  | #DIV/0! |
| MIR375   | 0             | 0             | 0.05555555556 |  | 0            | #DIV/0! |
| MIR378I  | 0.04761904762 | 0.04761904762 | 0             |  | inf          | #DIV/0! |
| IIR378C  | 0.2857142857  | 0.2857142857  | 0             |  | inf          | #DIV/0! |
| IIR378D  | 0.1904761905  | 0.1904761905  | 0.1111111111  |  | 1.529411765  | #DIV/0! |
| MIR378I  | 0             | 0             | 0.05555555556 |  | 0            | #DIV/0! |
| MIR378I  | 0.04761904762 | 0.04761904762 | 0.1111111111  |  | 0.325        | #DIV/0! |
| IIR378C  | 0.04761904762 | 0.04761904762 | 0.05555555556 |  | 0.7          | #DIV/0! |
| IIR378I  | 0             | 0             | 0.05555555556 |  | 0            | #DIV/0! |
| MIR378I  | 0             | 0             | 0.1111111111  |  | 0            | #DIV/0! |
| MIR383   | 0.09523809524 | 0.09523809524 | 0.1111111111  |  | 0.6842105263 | #DIV/0! |
| MIR3907  | 0.09523809524 | 0.09523809524 | 0.05555555556 |  | 1.473684211  | #DIV/0! |
| MIR3908  | 0.04761904762 | 0.04761904762 | 0.1111111111  |  | 0.325        | #DIV/0! |
| MIR3909  | 0             | 0             | 0.1111111111  |  | 0            | #DIV/0! |
| IIR3910  | 0.04761904762 | 0.04761904762 | 0.05555555556 |  | 0.7          | #DIV/0! |
| IIR3910  | 0.04761904762 | 0.04761904762 | 0.05555555556 |  | 0.7          | #DIV/0! |
| MIR3911  | 0.09523809524 | 0.09523809524 | 0.05555555556 |  | 1.473684211  | #DIV/0! |
| MIR3912  | 0             | 0             | 0.05555555556 |  | 0            | #DIV/0! |
| IIR3913  | 0.09523809524 | 0.09523809524 | 0.1111111111  |  | 0.6842105263 | #DIV/0! |



|                |               |               |               |  |              |         |
|----------------|---------------|---------------|---------------|--|--------------|---------|
| <b>IR3913</b>  | 0.09523809524 | 0.09523809524 | 0.1111111111  |  | 0.6842105263 | #DIV/0! |
| <b>IR3914</b>  | 0.09523809524 | 0.09523809524 | 0.1111111111  |  | 0.6842105263 | #DIV/0! |
| <b>IR3914</b>  | 0.09523809524 | 0.09523809524 | 0.1111111111  |  | 0.6842105263 | #DIV/0! |
| <b>MIR3916</b> | 0.1428571429  | 0.1428571429  | 0             |  | inf          | #DIV/0! |
| <b>MIR3917</b> | 0.04761904762 | 0.04761904762 | 0.1111111111  |  | 0.325        | #DIV/0! |
| <b>MIR3919</b> | 0.1428571429  | 0.1428571429  | 0.05555555556 |  | 2.333333333  | #DIV/0! |
| <b>MIR3921</b> | 0.09523809524 | 0.09523809524 | 0.1111111111  |  | 0.6842105263 | #DIV/0! |
| <b>MIR3922</b> | 0.04761904762 | 0.04761904762 | 0.05555555556 |  | 0.7          | #DIV/0! |
| <b>MIR3923</b> | 0.04761904762 | 0.04761904762 | 0             |  | inf          | #DIV/0! |
| <b>MIR3924</b> | 0.09523809524 | 0.09523809524 | 0.05555555556 |  | 1.473684211  | #DIV/0! |
| <b>MIR3925</b> | 0.04761904762 | 0.04761904762 | 0.05555555556 |  | 0.7          | #DIV/0! |
| <b>IR3926</b>  | 0.09523809524 | 0.09523809524 | 0.1111111111  |  | 0.6842105263 | #DIV/0! |
| <b>IR3926</b>  | 0.09523809524 | 0.09523809524 | 0.1111111111  |  | 0.6842105263 | #DIV/0! |
| <b>MIR3927</b> | 0.04761904762 | 0.04761904762 | 0.05555555556 |  | 0.7          | #DIV/0! |
| <b>MIR3928</b> | 0.04761904762 | 0.04761904762 | 0.1111111111  |  | 0.325        | #DIV/0! |
| <b>MIR3929</b> | 0.09523809524 | 0.09523809524 | 0             |  | inf          | #DIV/0! |
| <b>MIR3934</b> | 0.04761904762 | 0.04761904762 | 0             |  | inf          | #DIV/0! |
| <b>MIR3935</b> | 0.04761904762 | 0.04761904762 | 0             |  | inf          | #DIV/0! |
| <b>MIR3936</b> | 0.04761904762 | 0.04761904762 | 0             |  | inf          | #DIV/0! |
| <b>IR3936H</b> | 0.04761904762 | 0.04761904762 | 0             |  | inf          | #DIV/0! |
| <b>MIR3938</b> | 0.04761904762 | 0.04761904762 | 0             |  | inf          | #DIV/0! |
| <b>MIR3940</b> | 0.1428571429  | 0.1428571429  | 0.05555555556 |  | 2.333333333  | #DIV/0! |
| <b>MIR3941</b> | 0.1428571429  | 0.1428571429  | 0.05555555556 |  | 2.333333333  | #DIV/0! |
| <b>MIR3942</b> | 0             | 0             | 0             |  |              | #DIV/0! |
| <b>MIR3943</b> | 0.04761904762 | 0.04761904762 | 0.1666666667  |  | 0.2          | #DIV/0! |
| <b>MIR3944</b> | 0.1904761905  | 0.1904761905  | 0             |  | inf          | #DIV/0! |
| <b>MIR3945</b> | 0             | 0             | 0.05555555556 |  | 0            | #DIV/0! |
| <b>IR3945H</b> | 0             | 0             | 0.05555555556 |  | 0            | #DIV/0! |
| <b>MIR3960</b> | 0.09523809524 | 0.09523809524 | 0.05555555556 |  | 1.473684211  | #DIV/0! |
| <b>MIR3972</b> | 0.04761904762 | 0.04761904762 | 0.1111111111  |  | 0.325        | #DIV/0! |
| <b>MIR3974</b> | 0.04761904762 | 0.04761904762 | 0.1111111111  |  | 0.325        | #DIV/0! |
| <b>MIR3975</b> | 0.09523809524 | 0.09523809524 | 0             |  | inf          | #DIV/0! |
| <b>MIR3976</b> | 0.09523809524 | 0.09523809524 | 0             |  | inf          | #DIV/0! |
| <b>IR3976H</b> | 0.09523809524 | 0.09523809524 | 0             |  | inf          | #DIV/0! |
| <b>MIR3977</b> | 0.04761904762 | 0.04761904762 | 0.05555555556 |  | 0.7          | #DIV/0! |
| <b>IR422A</b>  | 0.04761904762 | 0.04761904762 | 0.05555555556 |  | 0.7          | #DIV/0! |
| <b>MIR423</b>  | 0             | 0             | 0.05555555556 |  | 0            | #DIV/0! |
| <b>MIR425</b>  | 0.09523809524 | 0.09523809524 | 0             |  | inf          | #DIV/0! |
| <b>MIR4251</b> | 0             | 0             | 0.05555555556 |  | 0            | #DIV/0! |
| <b>MIR4252</b> | 0             | 0             | 0.05555555556 |  | 0            | #DIV/0! |
| <b>MIR4253</b> | 0.04761904762 | 0.04761904762 | 0.1111111111  |  | 0.325        | #DIV/0! |
| <b>MIR4254</b> | 0.04761904762 | 0.04761904762 | 0.1111111111  |  | 0.325        | #DIV/0! |
| <b>MIR4255</b> | 0.04761904762 | 0.04761904762 | 0             |  | inf          | #DIV/0! |
| <b>MIR4256</b> | 0.04761904762 | 0.04761904762 | 0.05555555556 |  | 0.7          | #DIV/0! |
| <b>MIR4257</b> | 0.1904761905  | 0.1904761905  | 0.05555555556 |  | 3.294117647  | #DIV/0! |
| <b>MIR4258</b> | 0.1904761905  | 0.1904761905  | 0.1111111111  |  | 1.529411765  | #DIV/0! |
| <b>MIR4260</b> | 0.1428571429  | 0.1428571429  | 0             |  | inf          | #DIV/0! |
| <b>MIR4261</b> | 0             | 0             | 0.05555555556 |  | 0            | #DIV/0! |
| <b>MIR4262</b> | 0             | 0             | 0.05555555556 |  | 0            | #DIV/0! |
| <b>MIR4263</b> | 0             | 0             | 0.1111111111  |  | 0            | #DIV/0! |
| <b>MIR4264</b> | 0             | 0             | 0.05555555556 |  | 0            | #DIV/0! |

|         |               |               |               |  |               |         |
|---------|---------------|---------------|---------------|--|---------------|---------|
| MIR4265 | 0             | 0             | 0.05555555556 |  | 0             | #DIV/0! |
| MIR4266 | 0             | 0             | 0.05555555556 |  | 0             | #DIV/0! |
| MIR4267 | 0             | 0             | 0.05555555556 |  | 0             | #DIV/0! |
| MIR4268 | 0             | 0             | 0.05555555556 |  | 0             | #DIV/0! |
| MIR4269 | 0             | 0             | 0.05555555556 |  | 0             | #DIV/0! |
| MIR4270 | 0.04761904762 | 0.04761904762 | 0             |  | inf           | #DIV/0! |
| MIR4271 | 0.09523809524 | 0.09523809524 | 0             |  | inf           | #DIV/0! |
| MIR4272 | 0.04761904762 | 0.04761904762 | 0             |  | inf           | #DIV/0! |
| MIR4273 | 0.04761904762 | 0.04761904762 | 0             |  | inf           | #DIV/0! |
| MIR4276 | 0             | 0             | 0.05555555556 |  | 0             | #DIV/0! |
| MIR4277 | 0             | 0             | 0.11111111111 |  | 0             | #DIV/0! |
| MIR4278 | 0             | 0             | 0.05555555556 |  | 0             | #DIV/0! |
| MIR4279 | 0.04761904762 | 0.04761904762 | 0.05555555556 |  | 0.7           | #DIV/0! |
| MIR4280 | 0.04761904762 | 0.04761904762 | 0             |  | inf           | #DIV/0! |
| MIR4281 | 0.09523809524 | 0.09523809524 | 0.05555555556 |  | 1.473684211   | #DIV/0! |
| MIR4283 | 0.1428571429  | 0.1428571429  | 0.16666666667 |  | 0.66666666667 | #DIV/0! |
| MIR4283 | 0.1428571429  | 0.1428571429  | 0.16666666667 |  | 0.66666666667 | #DIV/0! |
| MIR4284 | 0.1428571429  | 0.1428571429  | 0.11111111111 |  | 1.083333333   | #DIV/0! |
| MIR4285 | 0.04761904762 | 0.04761904762 | 0.05555555556 |  | 0.7           | #DIV/0! |
| MIR4286 | 0.09523809524 | 0.09523809524 | 0.11111111111 |  | 0.6842105263  | #DIV/0! |
| MIR4287 | 0.04761904762 | 0.04761904762 | 0.11111111111 |  | 0.325         | #DIV/0! |
| MIR4288 | 0.04761904762 | 0.04761904762 | 0.11111111111 |  | 0.325         | #DIV/0! |
| MIR4289 | 0             | 0             | 0.05555555556 |  | 0             | #DIV/0! |
| MIR429  | 0             | 0             | 0.11111111111 |  | 0             | #DIV/0! |
| MIR4290 | 0.09523809524 | 0.09523809524 | 0.05555555556 |  | 1.473684211   | #DIV/0! |
| MIR4290 | 0.09523809524 | 0.09523809524 | 0.05555555556 |  | 1.473684211   | #DIV/0! |
| MIR4291 | 0.04761904762 | 0.04761904762 | 0.05555555556 |  | 0.7           | #DIV/0! |
| MIR4292 | 0.1428571429  | 0.1428571429  | 0.05555555556 |  | 2.333333333   | #DIV/0! |
| MIR4293 | 0.09523809524 | 0.09523809524 | 0.11111111111 |  | 0.6842105263  | #DIV/0! |
| MIR4294 | 0.09523809524 | 0.09523809524 | 0.05555555556 |  | 1.473684211   | #DIV/0! |
| MIR4295 | 0.1428571429  | 0.1428571429  | 0.05555555556 |  | 2.333333333   | #DIV/0! |
| MIR4296 | 0.2380952381  | 0.2380952381  | 0.05555555556 |  | 4.375         | #DIV/0! |
| MIR4297 | 0.2857142857  | 0.2857142857  | 0             |  | inf           | #DIV/0! |
| MIR4298 | 0.04761904762 | 0.04761904762 | 0             |  | inf           | #DIV/0! |
| MIR4302 | 0.04761904762 | 0.04761904762 | 0.05555555556 |  | 0.7           | #DIV/0! |
| MIR4303 | 0.1904761905  | 0.1904761905  | 0.05555555556 |  | 3.294117647   | #DIV/0! |
| MIR4304 | 0.04761904762 | 0.04761904762 | 0.11111111111 |  | 0.325         | #DIV/0! |
| MIR4308 | 0.04761904762 | 0.04761904762 | 0             |  | inf           | #DIV/0! |
| MIR4310 | 0.04761904762 | 0.04761904762 | 0.05555555556 |  | 0.7           | #DIV/0! |
| MIR4312 | 0.04761904762 | 0.04761904762 | 0.05555555556 |  | 0.7           | #DIV/0! |
| MIR4313 | 0.04761904762 | 0.04761904762 | 0.05555555556 |  | 0.7           | #DIV/0! |
| MIR4314 | 0             | 0             | 0.05555555556 |  | 0             | #DIV/0! |
| MIR4315 | 0.1428571429  | 0.1428571429  | 0             |  | inf           | #DIV/0! |
| MIR4315 | 0.1428571429  | 0.1428571429  | 0             |  | inf           | #DIV/0! |
| MIR4316 | 0.04761904762 | 0.04761904762 | 0             |  | inf           | #DIV/0! |
| MIR4317 | 0.09523809524 | 0.09523809524 | 0             |  | inf           | #DIV/0! |
| MIR4318 | 0.04761904762 | 0.04761904762 | 0             |  | inf           | #DIV/0! |
| MIR4319 | 0.04761904762 | 0.04761904762 | 0             |  | inf           | #DIV/0! |
| MIR4320 | 0.04761904762 | 0.04761904762 | 0             |  | inf           | #DIV/0! |
| MIR4321 | 0.09523809524 | 0.09523809524 | 0.11111111111 |  | 0.6842105263  | #DIV/0! |
| MIR4323 | 0.04761904762 | 0.04761904762 | 0.05555555556 |  | 0.7           | #DIV/0! |

|         |               |               |               |  |              |         |
|---------|---------------|---------------|---------------|--|--------------|---------|
| MIR4324 | 0.09523809524 | 0.09523809524 | 0.1111111111  |  | 0.6842105263 | #DIV/0! |
| MIR4325 | 0.1428571429  | 0.1428571429  | 0.2222222222  |  | 0.4583333333 | #DIV/0! |
| MIR4326 | 0.1428571429  | 0.1428571429  | 0.2222222222  |  | 0.4583333333 | #DIV/0! |
| MIR4327 | 0.04761904762 | 0.04761904762 | 0.05555555556 |  | 0.7          | #DIV/0! |
| MIR4418 | 0.04761904762 | 0.04761904762 | 0.1111111111  |  | 0.325        | #DIV/0! |
| MIR4420 | 0             | 0             | 0.1111111111  |  | 0            | #DIV/0! |
| MIR4421 | 0.04761904762 | 0.04761904762 | 0.05555555556 |  | 0.7          | #DIV/0! |
| MIR4422 | 0.04761904762 | 0.04761904762 | 0.05555555556 |  | 0.7          | #DIV/0! |
| IR4422H | 0.04761904762 | 0.04761904762 | 0.05555555556 |  | 0.7          | #DIV/0! |
| MIR4423 | 0.04761904762 | 0.04761904762 | 0.05555555556 |  | 0.7          | #DIV/0! |
| MIR4424 | 0.1428571429  | 0.1428571429  | 0             |  | inf          | #DIV/0! |
| MIR4425 | 0.04761904762 | 0.04761904762 | 0.1111111111  |  | 0.325        | #DIV/0! |
| MIR4426 | 0.2380952381  | 0.2380952381  | 0.05555555556 |  | 4.375        | #DIV/0! |
| MIR4427 | 0.1428571429  | 0.1428571429  | 0             |  | inf          | #DIV/0! |
| MIR4428 | 0.1428571429  | 0.1428571429  | 0             |  | inf          | #DIV/0! |
| MIR4429 | 0             | 0             | 0.05555555556 |  | 0            | #DIV/0! |
| MIR4431 | 0.04761904762 | 0.04761904762 | 0.05555555556 |  | 0.7          | #DIV/0! |
| MIR4432 | 0.04761904762 | 0.04761904762 | 0.05555555556 |  | 0.7          | #DIV/0! |
| IR4432H | 0.04761904762 | 0.04761904762 | 0.05555555556 |  | 0.7          | #DIV/0! |
| IR4433  | 0             | 0             | 0.05555555556 |  | 0            | #DIV/0! |
| IR4433  | 0             | 0             | 0.05555555556 |  | 0            | #DIV/0! |
| MIR4434 | 0             | 0             | 0.05555555556 |  | 0            | #DIV/0! |
| IR4435  | 0             | 0             | 0.05555555556 |  | 0            | #DIV/0! |
| IR4435  | 0             | 0             | 0.05555555556 |  | 0            | #DIV/0! |
| R4435-2 | 0             | 0             | 0.05555555556 |  | 0            | #DIV/0! |
| IR4436  | 0             | 0             | 0.05555555556 |  | 0            | #DIV/0! |
| IR4436H | 0             | 0             | 0.05555555556 |  | 0            | #DIV/0! |
| IR4436H | 0             | 0             | 0.05555555556 |  | 0            | #DIV/0! |
| MIR4437 | 0             | 0             | 0.05555555556 |  | 0            | #DIV/0! |
| MIR4438 | 0             | 0             | 0.05555555556 |  | 0            | #DIV/0! |
| MIR4439 | 0             | 0             | 0.05555555556 |  | 0            | #DIV/0! |
| MIR4440 | 0             | 0             | 0.05555555556 |  | 0            | #DIV/0! |
| MIR4441 | 0             | 0             | 0.05555555556 |  | 0            | #DIV/0! |
| MIR4443 | 0.09523809524 | 0.09523809524 | 0             |  | inf          | #DIV/0! |
| IR4444  | 0.04761904762 | 0.04761904762 | 0.1111111111  |  | 0.325        | #DIV/0! |
| IR4444  | 0.04761904762 | 0.04761904762 | 0.1111111111  |  | 0.325        | #DIV/0! |
| MIR4445 | 0.09523809524 | 0.09523809524 | 0.05555555556 |  | 1.473684211  | #DIV/0! |
| MIR4446 | 0.09523809524 | 0.09523809524 | 0.05555555556 |  | 1.473684211  | #DIV/0! |
| MIR4447 | 0.09523809524 | 0.09523809524 | 0.05555555556 |  | 1.473684211  | #DIV/0! |
| MIR4448 | 0.1904761905  | 0.1904761905  | 0.05555555556 |  | 3.294117647  | #DIV/0! |
| MIR4449 | 0.2380952381  | 0.2380952381  | 0.05555555556 |  | 4.375        | #DIV/0! |
| MIR4450 | 0.04761904762 | 0.04761904762 | 0.05555555556 |  | 0.7          | #DIV/0! |
| MIR4451 | 0             | 0             | 0.05555555556 |  | 0            | #DIV/0! |
| MIR4452 | 0             | 0             | 0.05555555556 |  | 0            | #DIV/0! |
| MIR4453 | 0             | 0             | 0.05555555556 |  | 0            | #DIV/0! |
| IR4453H | 0             | 0             | 0.05555555556 |  | 0            | #DIV/0! |
| MIR4454 | 0.2857142857  | 0.2857142857  | 0.2222222222  |  | 1.1          | #DIV/0! |
| MIR4455 | 0             | 0             | 0.05555555556 |  | 0            | #DIV/0! |
| MIR4456 | 0             | 0             | 0.05555555556 |  | 0            | #DIV/0! |
| MIR4457 | 0             | 0             | 0.1111111111  |  | 0            | #DIV/0! |
| MIR4458 | 0             | 0             | 0.05555555556 |  | 0            | #DIV/0! |

|                |               |               |                |  |              |         |
|----------------|---------------|---------------|----------------|--|--------------|---------|
| <b>IR4458E</b> | 0             | 0             | 0.055555555556 |  | 0            | #DIV/0! |
| <b>MIR4460</b> | 0.04761904762 | 0.04761904762 | 0              |  | inf          | #DIV/0! |
| <b>MIR4462</b> | 0.04761904762 | 0.04761904762 | 0.055555555556 |  | 0.7          | #DIV/0! |
| <b>MIR4464</b> | 0             | 0             | 0              |  |              | #DIV/0! |
| <b>MIR4467</b> | 0.04761904762 | 0.04761904762 | 0.055555555556 |  | 0.7          | #DIV/0! |
| <b>MIR4468</b> | 0.04761904762 | 0.04761904762 | 0.055555555556 |  | 0.7          | #DIV/0! |
| <b>MIR4469</b> | 0.09523809524 | 0.09523809524 | 0.16666666667  |  | 0.4210526316 | #DIV/0! |
| <b>MIR4470</b> | 0.1428571429  | 0.1428571429  | 0.16666666667  |  | 0.6666666667 | #DIV/0! |
| <b>MIR4471</b> | 0.1904761905  | 0.1904761905  | 0.1111111111   |  | 1.529411765  | #DIV/0! |
| <b>IR4472-</b> | 0.04761904762 | 0.04761904762 | 0.16666666667  |  | 0.2          | #DIV/0! |
| <b>IR4472-</b> | 0             | 0             | 0.055555555556 |  | 0            | #DIV/0! |
| <b>MIR4473</b> | 0.04761904762 | 0.04761904762 | 0.055555555556 |  | 0.7          | #DIV/0! |
| <b>MIR4474</b> | 0.04761904762 | 0.04761904762 | 0.055555555556 |  | 0.7          | #DIV/0! |
| <b>MIR4475</b> | 0.09523809524 | 0.09523809524 | 0.055555555556 |  | 1.473684211  | #DIV/0! |
| <b>MIR4476</b> | 0.09523809524 | 0.09523809524 | 0.055555555556 |  | 1.473684211  | #DIV/0! |
| <b>IR4477</b>  | 0.09523809524 | 0.09523809524 | 0.2222222222   |  | 0.2894736842 | #DIV/0! |
| <b>IR4477</b>  | 0.09523809524 | 0.09523809524 | 0.2222222222   |  | 0.2894736842 | #DIV/0! |
| <b>MIR4478</b> | 0.09523809524 | 0.09523809524 | 0.055555555556 |  | 1.473684211  | #DIV/0! |
| <b>MIR4479</b> | 0.1428571429  | 0.1428571429  | 0.055555555556 |  | 2.333333333  | #DIV/0! |
| <b>MIR4480</b> | 0.09523809524 | 0.09523809524 | 0.1111111111   |  | 0.6842105263 | #DIV/0! |
| <b>MIR4481</b> | 0.09523809524 | 0.09523809524 | 0.1111111111   |  | 0.6842105263 | #DIV/0! |
| <b>MIR4482</b> | 0.1428571429  | 0.1428571429  | 0.055555555556 |  | 2.333333333  | #DIV/0! |
| <b>MIR4483</b> | 0.1428571429  | 0.1428571429  | 0.055555555556 |  | 2.333333333  | #DIV/0! |
| <b>MIR4484</b> | 0.2380952381  | 0.2380952381  | 0.055555555556 |  | 4.375        | #DIV/0! |
| <b>MIR4487</b> | 0             | 0             | 0.055555555556 |  | 0            | #DIV/0! |
| <b>MIR4494</b> | 0.04761904762 | 0.04761904762 | 0.055555555556 |  | 0.7          | #DIV/0! |
| <b>MIR4495</b> | 0.1904761905  | 0.1904761905  | 0.055555555556 |  | 3.294117647  | #DIV/0! |
| <b>MIR4496</b> | 0.04761904762 | 0.04761904762 | 0.055555555556 |  | 0.7          | #DIV/0! |
| <b>MIR4498</b> | 0             | 0             | 0.1111111111   |  | 0            | #DIV/0! |
| <b>MIR4499</b> | 0.04761904762 | 0.04761904762 | 0              |  | inf          | #DIV/0! |
| <b>IR449A</b>  | 0.04761904762 | 0.04761904762 | 0.055555555556 |  | 0.7          | #DIV/0! |
| <b>MIR449B</b> | 0.04761904762 | 0.04761904762 | 0.055555555556 |  | 0.7          | #DIV/0! |
| <b>IR449C</b>  | 0.04761904762 | 0.04761904762 | 0.055555555556 |  | 0.7          | #DIV/0! |
| <b>MIR4504</b> | 0.04761904762 | 0.04761904762 | 0              |  | inf          | #DIV/0! |
| <b>MIR4505</b> | 0.09523809524 | 0.09523809524 | 0              |  | inf          | #DIV/0! |
| <b>MIR4507</b> | 0.04761904762 | 0.04761904762 | 0              |  | inf          | #DIV/0! |
| <b>IR4509-</b> | 0.1428571429  | 0.1428571429  | 0              |  | inf          | #DIV/0! |
| <b>IR4509-</b> | 0.1428571429  | 0.1428571429  | 0              |  | inf          | #DIV/0! |
| <b>IR4509-</b> | 0.1428571429  | 0.1428571429  | 0              |  | inf          | #DIV/0! |
| <b>MIR4510</b> | 0             | 0             | 0              |  |              | #DIV/0! |
| <b>MIR4511</b> | 0.04761904762 | 0.04761904762 | 0.055555555556 |  | 0.7          | #DIV/0! |
| <b>MIR4512</b> | 0.04761904762 | 0.04761904762 | 0.055555555556 |  | 0.7          | #DIV/0! |
| <b>MIR4513</b> | 0.04761904762 | 0.04761904762 | 0.055555555556 |  | 0.7          | #DIV/0! |
| <b>MIR4514</b> | 0.04761904762 | 0.04761904762 | 0.055555555556 |  | 0.7          | #DIV/0! |
| <b>MIR4515</b> | 0.04761904762 | 0.04761904762 | 0.055555555556 |  | 0.7          | #DIV/0! |
| <b>MIR4516</b> | 0.09523809524 | 0.09523809524 | 0.2222222222   |  | 0.2894736842 | #DIV/0! |
| <b>MIR4517</b> | 0.04761904762 | 0.04761904762 | 0              |  | inf          | #DIV/0! |
| <b>MIR4518</b> | 0.04761904762 | 0.04761904762 | 0              |  | inf          | #DIV/0! |
| <b>MIR4519</b> | 0.04761904762 | 0.04761904762 | 0              |  | inf          | #DIV/0! |
| <b>IR451A</b>  | 0.04761904762 | 0.04761904762 | 0.055555555556 |  | 0.7          | #DIV/0! |
| <b>MIR451B</b> | 0.04761904762 | 0.04761904762 | 0.055555555556 |  | 0.7          | #DIV/0! |

|          |               |               |               |  |              |         |
|----------|---------------|---------------|---------------|--|--------------|---------|
| IIR4520- | 0             | 0             | 0.05555555556 |  | 0            | #DIV/0! |
| IIR4520- | 0             | 0             | 0.05555555556 |  | 0            | #DIV/0! |
| MIR4521  | 0.04761904762 | 0.04761904762 | 0.05555555556 |  | 0.7          | #DIV/0! |
| MIR4522  | 0.04761904762 | 0.04761904762 | 0.05555555556 |  | 0.7          | #DIV/0! |
| MIR4523  | 0.04761904762 | 0.04761904762 | 0.05555555556 |  | 0.7          | #DIV/0! |
| IIR4524  | 0             | 0             | 0             |  |              | #DIV/0! |
| IIR4524  | 0             | 0             | 0             |  |              | #DIV/0! |
| MIR4525  | 0             | 0             | 0             |  |              | #DIV/0! |
| MIR4526  | 0.09523809524 | 0.09523809524 | 0.05555555556 |  | 1.473684211  | #DIV/0! |
| MIR4527  | 0.04761904762 | 0.04761904762 | 0.05555555556 |  | 0.7          | #DIV/0! |
| IIR4527H | 0.04761904762 | 0.04761904762 | 0.05555555556 |  | 0.7          | #DIV/0! |
| MIR4528  | 0.09523809524 | 0.09523809524 | 0             |  | inf          | #DIV/0! |
| MIR4529  | 0.09523809524 | 0.09523809524 | 0.05555555556 |  | 1.473684211  | #DIV/0! |
| MIR4530  | 0.04761904762 | 0.04761904762 | 0.05555555556 |  | 0.7          | #DIV/0! |
| MIR4531  | 0.09523809524 | 0.09523809524 | 0.05555555556 |  | 1.473684211  | #DIV/0! |
| MIR4533  | 0.1428571429  | 0.1428571429  | 0.1111111111  |  | 1.083333333  | #DIV/0! |
| MIR4534  | 0.04761904762 | 0.04761904762 | 0.1111111111  |  | 0.325        | #DIV/0! |
| MIR4535  | 0.04761904762 | 0.04761904762 | 0.1666666667  |  | 0.2          | #DIV/0! |
| MIR4537  | 0.04761904762 | 0.04761904762 | 0             |  | inf          | #DIV/0! |
| MIR4538  | 0.09523809524 | 0.09523809524 | 0             |  | inf          | #DIV/0! |
| MIR4539  | 0.09523809524 | 0.09523809524 | 0.1666666667  |  | 0.4210526316 | #DIV/0! |
| MIR454   | 0.1428571429  | 0.1428571429  | 0             |  | inf          | #DIV/0! |
| MIR4540  | 0.09523809524 | 0.09523809524 | 0.05555555556 |  | 1.473684211  | #DIV/0! |
| MIR455   | 0.04761904762 | 0.04761904762 | 0.05555555556 |  | 0.7          | #DIV/0! |
| MIR4632  | 0.04761904762 | 0.04761904762 | 0.1111111111  |  | 0.325        | #DIV/0! |
| MIR4633  | 0.04761904762 | 0.04761904762 | 0             |  | inf          | #DIV/0! |
| MIR4634  | 0             | 0             | 0.05555555556 |  | 0            | #DIV/0! |
| MIR4635  | 0             | 0             | 0.05555555556 |  | 0            | #DIV/0! |
| MIR4636  | 0             | 0             | 0.05555555556 |  | 0            | #DIV/0! |
| MIR4637  | 0.04761904762 | 0.04761904762 | 0.05555555556 |  | 0.7          | #DIV/0! |
| MIR4638  | 0.09523809524 | 0.09523809524 | 0.05555555556 |  | 1.473684211  | #DIV/0! |
| MIR4641  | 0             | 0             | 0.05555555556 |  | 0            | #DIV/0! |
| MIR4642  | 0.04761904762 | 0.04761904762 | 0.05555555556 |  | 0.7          | #DIV/0! |
| MIR4643  | 0             | 0             | 0             |  |              | #DIV/0! |
| MIR4646  | 0.04761904762 | 0.04761904762 | 0             |  | inf          | #DIV/0! |
| MIR4647  | 0.04761904762 | 0.04761904762 | 0.05555555556 |  | 0.7          | #DIV/0! |
| MIR4648  | 0.04761904762 | 0.04761904762 | 0.1666666667  |  | 0.2          | #DIV/0! |
| MIR4649  | 0.04761904762 | 0.04761904762 | 0.1666666667  |  | 0.2          | #DIV/0! |
| IIR4650- | 0.1428571429  | 0.1428571429  | 0.1111111111  |  | 1.083333333  | #DIV/0! |
| IIR4650- | 0.1428571429  | 0.1428571429  | 0.1111111111  |  | 1.083333333  | #DIV/0! |
| MIR4651  | 0.1428571429  | 0.1428571429  | 0.1111111111  |  | 1.083333333  | #DIV/0! |
| MIR4652  | 0.04761904762 | 0.04761904762 | 0.1111111111  |  | 0.325        | #DIV/0! |
| MIR4653  | 0.04761904762 | 0.04761904762 | 0.05555555556 |  | 0.7          | #DIV/0! |
| MIR4654  | 0.1428571429  | 0.1428571429  | 0             |  | inf          | #DIV/0! |
| MIR4655  | 0.04761904762 | 0.04761904762 | 0.1666666667  |  | 0.2          | #DIV/0! |
| MIR4656  | 0.04761904762 | 0.04761904762 | 0.1666666667  |  | 0.2          | #DIV/0! |
| MIR4657  | 0.04761904762 | 0.04761904762 | 0.2222222222  |  | 0.1375       | #DIV/0! |
| MIR4658  | 0.04761904762 | 0.04761904762 | 0.05555555556 |  | 0.7          | #DIV/0! |
| IIR4659  | 0.09523809524 | 0.09523809524 | 0.1111111111  |  | 0.6842105263 | #DIV/0! |
| IIR4659  | 0.09523809524 | 0.09523809524 | 0.1111111111  |  | 0.6842105263 | #DIV/0! |
| MIR466   | 0.04761904762 | 0.04761904762 | 0             |  | inf          | #DIV/0! |

|          |               |               |              |  |              |         |
|----------|---------------|---------------|--------------|--|--------------|---------|
| MIR4660  | 0.09523809524 | 0.09523809524 | 0.1111111111 |  | 0.6842105263 | #DIV/0! |
| MIR4661  | 0.1904761905  | 0.1904761905  | 0.1111111111 |  | 1.529411765  | #DIV/0! |
| IIR4662  | 0.1428571429  | 0.1428571429  | 0.1111111111 |  | 1.083333333  | #DIV/0! |
| IIR4662  | 0.1428571429  | 0.1428571429  | 0.1111111111 |  | 1.083333333  | #DIV/0! |
| MIR4663  | 0.1428571429  | 0.1428571429  | 0.1111111111 |  | 1.083333333  | #DIV/0! |
| MIR4664  | 0.04761904762 | 0.04761904762 | 0.1666666667 |  | 0.2          | #DIV/0! |
| MIR4665  | 0.04761904762 | 0.04761904762 | 0.0555555556 |  | 0.7          | #DIV/0! |
| IIR4666  | 0.1428571429  | 0.1428571429  | 0            |  | inf          | #DIV/0! |
| MIR4667  | 0.09523809524 | 0.09523809524 | 0.0555555556 |  | 1.473684211  | #DIV/0! |
| MIR4668  | 0.04761904762 | 0.04761904762 | 0.0555555556 |  | 0.7          | #DIV/0! |
| MIR4669  | 0.04761904762 | 0.04761904762 | 0            |  | inf          | #DIV/0! |
| MIR4670  | 0.04761904762 | 0.04761904762 | 0.0555555556 |  | 0.7          | #DIV/0! |
| MIR4671  | 0.09523809524 | 0.09523809524 | 0            |  | inf          | #DIV/0! |
| MIR4672  | 0.09523809524 | 0.09523809524 | 0.0555555556 |  | 1.473684211  | #DIV/0! |
| MIR4673  | 0.1428571429  | 0.1428571429  | 0.0555555556 |  | 2.333333333  | #DIV/0! |
| MIR4674  | 0.1428571429  | 0.1428571429  | 0.0555555556 |  | 2.333333333  | #DIV/0! |
| MIR4675  | 0.09523809524 | 0.09523809524 | 0.1111111111 |  | 0.6842105263 | #DIV/0! |
| MIR4676  | 0.1904761905  | 0.1904761905  | 0.0555555556 |  | 3.294117647  | #DIV/0! |
| MIR4677  | 0.1428571429  | 0.1428571429  | 0.0555555556 |  | 2.333333333  | #DIV/0! |
| MIR4678  | 0.1428571429  | 0.1428571429  | 0.1111111111 |  | 1.083333333  | #DIV/0! |
| IIR4679  | 0.1428571429  | 0.1428571429  | 0.1666666667 |  | 0.6666666667 | #DIV/0! |
| IIR4679  | 0.1428571429  | 0.1428571429  | 0.1666666667 |  | 0.6666666667 | #DIV/0! |
| MIR4680  | 0.1428571429  | 0.1428571429  | 0.0555555556 |  | 2.333333333  | #DIV/0! |
| MIR4681  | 0.2380952381  | 0.2380952381  | 0            |  | inf          | #DIV/0! |
| MIR4682  | 0.2380952381  | 0.2380952381  | 0            |  | inf          | #DIV/0! |
| MIR4683  | 0.09523809524 | 0.09523809524 | 0.1666666667 |  | 0.4210526316 | #DIV/0! |
| MIR4684  | 0.04761904762 | 0.04761904762 | 0.1111111111 |  | 0.325        | #DIV/0! |
| MIR4685  | 0.1428571429  | 0.1428571429  | 0            |  | inf          | #DIV/0! |
| MIR4686  | 0.04761904762 | 0.04761904762 | 0            |  | inf          | #DIV/0! |
| MIR4687  | 0.04761904762 | 0.04761904762 | 0            |  | inf          | #DIV/0! |
| MIR4688  | 0             | 0             | 0.0555555556 |  | 0            | #DIV/0! |
| MIR4689  | 0             | 0             | 0.0555555556 |  | 0            | #DIV/0! |
| MIR4690  | 0.04761904762 | 0.04761904762 | 0.1111111111 |  | 0.325        | #DIV/0! |
| MIR4698  | 0.04761904762 | 0.04761904762 | 0.0555555556 |  | 0.7          | #DIV/0! |
| MIR4699  | 0.04761904762 | 0.04761904762 | 0.0555555556 |  | 0.7          | #DIV/0! |
| MIR4700  | 0             | 0             | 0.1111111111 |  | 0            | #DIV/0! |
| MIR4701  | 0.04761904762 | 0.04761904762 | 0.0555555556 |  | 0.7          | #DIV/0! |
| MIR4707  | 0             | 0             | 0.0555555556 |  | 0            | #DIV/0! |
| MIR4710  | 0.04761904762 | 0.04761904762 | 0.0555555556 |  | 0.7          | #DIV/0! |
| MIR4712  | 0.1428571429  | 0.1428571429  | 0.0555555556 |  | 2.333333333  | #DIV/0! |
| MIR4713  | 0.04761904762 | 0.04761904762 | 0.0555555556 |  | 0.7          | #DIV/0! |
| IIR4713E | 0.04761904762 | 0.04761904762 | 0.0555555556 |  | 0.7          | #DIV/0! |
| MIR4714  | 0.04761904762 | 0.04761904762 | 0.0555555556 |  | 0.7          | #DIV/0! |
| MIR4716  | 0.04761904762 | 0.04761904762 | 0.0555555556 |  | 0.7          | #DIV/0! |
| MIR4717  | 0.09523809524 | 0.09523809524 | 0.2222222222 |  | 0.2894736842 | #DIV/0! |
| MIR4718  | 0.04761904762 | 0.04761904762 | 0            |  | inf          | #DIV/0! |
| MIR4719  | 0.04761904762 | 0.04761904762 | 0            |  | inf          | #DIV/0! |
| MIR4720  | 0.04761904762 | 0.04761904762 | 0            |  | inf          | #DIV/0! |
| MIR4721  | 0.04761904762 | 0.04761904762 | 0            |  | inf          | #DIV/0! |
| MIR4722  | 0.1904761905  | 0.1904761905  | 0            |  | inf          | #DIV/0! |
| MIR4723  | 0.04761904762 | 0.04761904762 | 0.0555555556 |  | 0.7          | #DIV/0! |

|         |               |               |               |  |              |         |
|---------|---------------|---------------|---------------|--|--------------|---------|
| MIR4724 | 0             | 0             | 0             |  |              | #DIV/0! |
| MIR4725 | 0             | 0             | 0             |  |              | #DIV/0! |
| MIR4726 | 0.04761904762 | 0.04761904762 | 0             |  | inf          | #DIV/0! |
| MIR4727 | 0.09523809524 | 0.09523809524 | 0             |  | inf          | #DIV/0! |
| MIR4728 | 0.09523809524 | 0.09523809524 | 0             |  | inf          | #DIV/0! |
| MIR4729 | 0.1428571429  | 0.1428571429  | 0             |  | inf          | #DIV/0! |
| MIR4730 | 0.04761904762 | 0.04761904762 | 0             |  | inf          | #DIV/0! |
| MIR4731 | 0.04761904762 | 0.04761904762 | 0.05555555556 |  | 0.7          | #DIV/0! |
| MIR4732 | 0.04761904762 | 0.04761904762 | 0.05555555556 |  | 0.7          | #DIV/0! |
| MIR4733 | 0             | 0             | 0             |  |              | #DIV/0! |
| MIR4734 | 0.04761904762 | 0.04761904762 | 0             |  | inf          | #DIV/0! |
| MIR4735 | 0.1428571429  | 0.1428571429  | 0             |  | inf          | #DIV/0! |
| MIR4736 | 0.09523809524 | 0.09523809524 | 0             |  | inf          | #DIV/0! |
| MIR4737 | 0.1428571429  | 0.1428571429  | 0             |  | inf          | #DIV/0! |
| MIR4738 | 0.04761904762 | 0.04761904762 | 0             |  | inf          | #DIV/0! |
| MIR4739 | 0.04761904762 | 0.04761904762 | 0             |  | inf          | #DIV/0! |
| MIR4740 | 0.04761904762 | 0.04761904762 | 0             |  | inf          | #DIV/0! |
| MIR4741 | 0.04761904762 | 0.04761904762 | 0.05555555556 |  | 0.7          | #DIV/0! |
| MIR4742 | 0.1428571429  | 0.1428571429  | 0.05555555556 |  | 2.333333333  | #DIV/0! |
| MIR4743 | 0.04761904762 | 0.04761904762 | 0             |  | inf          | #DIV/0! |
| MIR4744 | 0.04761904762 | 0.04761904762 | 0             |  | inf          | #DIV/0! |
| MIR4745 | 0.09523809524 | 0.09523809524 | 0.1111111111  |  | 0.6842105263 | #DIV/0! |
| MIR4747 | 0.09523809524 | 0.09523809524 | 0.05555555556 |  | 1.473684211  | #DIV/0! |
| MIR4748 | 0.1428571429  | 0.1428571429  | 0.1111111111  |  | 1.083333333  | #DIV/0! |
| MIR4749 | 0.09523809524 | 0.09523809524 | 0.1111111111  |  | 0.6842105263 | #DIV/0! |
| MIR4750 | 0.09523809524 | 0.09523809524 | 0.1111111111  |  | 0.6842105263 | #DIV/0! |
| MIR4752 | 0.09523809524 | 0.09523809524 | 0.05555555556 |  | 1.473684211  | #DIV/0! |
| MIR4753 | 0.1428571429  | 0.1428571429  | 0.05555555556 |  | 2.333333333  | #DIV/0! |
| MIR4754 | 0.1428571429  | 0.1428571429  | 0.05555555556 |  | 2.333333333  | #DIV/0! |
| MIR4755 | 0.09523809524 | 0.09523809524 | 0.1111111111  |  | 0.6842105263 | #DIV/0! |
| MIR4756 | 0.09523809524 | 0.09523809524 | 0.1111111111  |  | 0.6842105263 | #DIV/0! |
| MIR4757 | 0             | 0             | 0.05555555556 |  | 0            | #DIV/0! |
| MIR4758 | 0.1428571429  | 0.1428571429  | 0.2222222222  |  | 0.4583333333 | #DIV/0! |
| MIR4759 | 0.04761904762 | 0.04761904762 | 0.1111111111  |  | 0.325        | #DIV/0! |
| MIR4760 | 0.04761904762 | 0.04761904762 | 0.05555555556 |  | 0.7          | #DIV/0! |
| MIR4761 | 0.04761904762 | 0.04761904762 | 0.05555555556 |  | 0.7          | #DIV/0! |
| MIR4762 | 0             | 0             | 0.1111111111  |  | 0            | #DIV/0! |
| MIR4763 | 0             | 0             | 0.1111111111  |  | 0            | #DIV/0! |
| MIR4764 | 0.04761904762 | 0.04761904762 | 0.1666666667  |  | 0.2          | #DIV/0! |
| MIR4765 | 0.1428571429  | 0.1428571429  | 0             |  | inf          | #DIV/0! |
| MIR4766 | 0             | 0             | 0.1111111111  |  | 0            | #DIV/0! |
| MIR4771 | 0             | 0             | 0.05555555556 |  | 0            | #DIV/0! |
| MIR4771 | 0             | 0             | 0.05555555556 |  | 0            | #DIV/0! |
| MIR4772 | 0             | 0             | 0.05555555556 |  | 0            | #DIV/0! |
| MIR4773 | 0             | 0             | 0.05555555556 |  | 0            | #DIV/0! |
| MIR4773 | 0             | 0             | 0.05555555556 |  | 0            | #DIV/0! |
| MIR4774 | 0.04761904762 | 0.04761904762 | 0.05555555556 |  | 0.7          | #DIV/0! |
| MIR4775 | 0             | 0             | 0.05555555556 |  | 0            | #DIV/0! |
| MIR4776 | 0             | 0             | 0.05555555556 |  | 0            | #DIV/0! |
| MIR4776 | 0             | 0             | 0.05555555556 |  | 0            | #DIV/0! |
| MIR4777 | 0             | 0             | 0.05555555556 |  | 0            | #DIV/0! |

|         |               |               |               |  |              |         |
|---------|---------------|---------------|---------------|--|--------------|---------|
| MIR4778 | 0             | 0             | 0.05555555556 |  | 0            | #DIV/0! |
| MIR4779 | 0             | 0             | 0.05555555556 |  | 0            | #DIV/0! |
| MIR4780 | 0             | 0             | 0.05555555556 |  | 0            | #DIV/0! |
| MIR4781 | 0.04761904762 | 0.04761904762 | 0.05555555556 |  | 0.7          | #DIV/0! |
| MIR4782 | 0             | 0             | 0.05555555556 |  | 0            | #DIV/0! |
| MIR4783 | 0             | 0             | 0.05555555556 |  | 0            | #DIV/0! |
| MIR4784 | 0             | 0             | 0.05555555556 |  | 0            | #DIV/0! |
| MIR4785 | 0             | 0             | 0.05555555556 |  | 0            | #DIV/0! |
| MIR4786 | 0             | 0             | 0.05555555556 |  | 0            | #DIV/0! |
| MIR4787 | 0.09523809524 | 0.09523809524 | 0             |  | inf          | #DIV/0! |
| MIR4788 | 0.1428571429  | 0.1428571429  | 0.05555555556 |  | 2.333333333  | #DIV/0! |
| MIR4789 | 0.1904761905  | 0.1904761905  | 0.05555555556 |  | 3.294117647  | #DIV/0! |
| MIR4790 | 0.04761904762 | 0.04761904762 | 0             |  | inf          | #DIV/0! |
| MIR4791 | 0.04761904762 | 0.04761904762 | 0             |  | inf          | #DIV/0! |
| MIR4793 | 0.09523809524 | 0.09523809524 | 0             |  | inf          | #DIV/0! |
| MIR4794 | 0.04761904762 | 0.04761904762 | 0.05555555556 |  | 0.7          | #DIV/0! |
| MIR4795 | 0.04761904762 | 0.04761904762 | 0             |  | inf          | #DIV/0! |
| MIR4796 | 0.09523809524 | 0.09523809524 | 0.05555555556 |  | 1.473684211  | #DIV/0! |
| MIR4797 | 0.1428571429  | 0.1428571429  | 0.05555555556 |  | 2.333333333  | #DIV/0! |
| MIR4799 | 0             | 0             | 0.05555555556 |  | 0            | #DIV/0! |
| MIR4800 | 0.04761904762 | 0.04761904762 | 0             |  | inf          | #DIV/0! |
| MIR4802 | 0.1904761905  | 0.1904761905  | 0.05555555556 |  | 3.294117647  | #DIV/0! |
| MIR4803 | 0             | 0             | 0.05555555556 |  | 0            | #DIV/0! |
| MIR4804 | 0             | 0             | 0.05555555556 |  | 0            | #DIV/0! |
| MIR4830 | 0.04761904762 | 0.04761904762 | 0             |  | inf          | #DIV/0! |
| MIR4840 | 0.04761904762 | 0.04761904762 | 0             |  | inf          | #DIV/0! |
| MIR4860 | 0.09523809524 | 0.09523809524 | 0.16666666667 |  | 0.4210526316 | #DIV/0! |
| MIR4860 | 0.09523809524 | 0.09523809524 | 0.16666666667 |  | 0.4210526316 | #DIV/0! |
| MIR4880 | 0.1428571429  | 0.1428571429  | 0             |  | inf          | #DIV/0! |
| MIR4890 | 0.04761904762 | 0.04761904762 | 0.11111111111 |  | 0.325        | #DIV/0! |
| MIR4900 | 0.04761904762 | 0.04761904762 | 0.05555555556 |  | 0.7          | #DIV/0! |
| MIR4910 | 0.04761904762 | 0.04761904762 | 0.05555555556 |  | 0.7          | #DIV/0! |
| MIR4920 | 0.04761904762 | 0.04761904762 | 0.05555555556 |  | 0.7          | #DIV/0! |
| MIR4970 | 0             | 0             | 0.05555555556 |  | 0            | #DIV/0! |
| MIR497H | 0             | 0             | 0.05555555556 |  | 0            | #DIV/0! |
| MIR4980 | 0.09523809524 | 0.09523809524 | 0.05555555556 |  | 1.473684211  | #DIV/0! |
| MIR4990 | 0.1428571429  | 0.1428571429  | 0.05555555556 |  | 2.333333333  | #DIV/0! |
| MIR499A | 0.09523809524 | 0.09523809524 | 0.11111111111 |  | 0.6842105263 | #DIV/0! |
| MIR499B | 0.09523809524 | 0.09523809524 | 0.11111111111 |  | 0.6842105263 | #DIV/0! |
| MIR5000 | 0             | 0             | 0.05555555556 |  | 0            | #DIV/0! |
| MIR5001 | 0             | 0             | 0.05555555556 |  | 0            | #DIV/0! |
| MIR5002 | 0.04761904762 | 0.04761904762 | 0.05555555556 |  | 0.7          | #DIV/0! |
| MIR5003 | 0             | 0             | 0.05555555556 |  | 0            | #DIV/0! |
| MIR5004 | 0.04761904762 | 0.04761904762 | 0             |  | inf          | #DIV/0! |
| MIR5008 | 0.1428571429  | 0.1428571429  | 0             |  | inf          | #DIV/0! |
| MIR5009 | 0.04761904762 | 0.04761904762 | 0.05555555556 |  | 0.7          | #DIV/0! |
| MIR5040 | 0.04761904762 | 0.04761904762 | 0             |  | inf          | #DIV/0! |
| MIR5087 | 0.1428571429  | 0.1428571429  | 0.05555555556 |  | 2.333333333  | #DIV/0! |
| MIR5088 | 0.09523809524 | 0.09523809524 | 0.11111111111 |  | 0.6842105263 | #DIV/0! |
| MIR5089 | 0.1428571429  | 0.1428571429  | 0             |  | inf          | #DIV/0! |
| MIR5090 | 0.04761904762 | 0.04761904762 | 0.05555555556 |  | 0.7          | #DIV/0! |





|         |               |               |               |  |              |         |
|---------|---------------|---------------|---------------|--|--------------|---------|
| MIR522  | 0.09523809524 | 0.09523809524 | 0.05555555556 |  | 1.473684211  | #DIV/0! |
| MIR523  | 0.09523809524 | 0.09523809524 | 0.05555555556 |  | 1.473684211  | #DIV/0! |
| MIR524  | 0.09523809524 | 0.09523809524 | 0.05555555556 |  | 1.473684211  | #DIV/0! |
| MIR525  | 0.09523809524 | 0.09523809524 | 0.05555555556 |  | 1.473684211  | #DIV/0! |
| IIR526A | 0.09523809524 | 0.09523809524 | 0.05555555556 |  | 1.473684211  | #DIV/0! |
| IIR526A | 0.09523809524 | 0.09523809524 | 0.05555555556 |  | 1.473684211  | #DIV/0! |
| MIR526H | 0.09523809524 | 0.09523809524 | 0.05555555556 |  | 1.473684211  | #DIV/0! |
| MIR527  | 0.09523809524 | 0.09523809524 | 0.05555555556 |  | 1.473684211  | #DIV/0! |
| MIR544I | 0.04761904762 | 0.04761904762 | 0.05555555556 |  | 0.7          | #DIV/0! |
| IIR548A | 0.1904761905  | 0.1904761905  | 0.1111111111  |  | 1.529411765  | #DIV/0! |
| IR548A  | 0.1428571429  | 0.1428571429  | 0.1111111111  |  | 1.083333333  | #DIV/0! |
| IR548A  | 0             | 0             | 0             |  |              | #DIV/0! |
| IIR548A | 0.09523809524 | 0.09523809524 | 0.05555555556 |  | 1.473684211  | #DIV/0! |
| IR548A  | 0.04761904762 | 0.04761904762 | 0.05555555556 |  | 0.7          | #DIV/0! |
| IR548A  | 0             | 0             | 0.05555555556 |  | 0            | #DIV/0! |
| IR548A  | 0.04761904762 | 0.04761904762 | 0             |  | inf          | #DIV/0! |
| IR548A  | 0.04761904762 | 0.04761904762 | 0.05555555556 |  | 0.7          | #DIV/0! |
| IR548A  | 0.1428571429  | 0.1428571429  | 0.1111111111  |  | 1.083333333  | #DIV/0! |
| IIR548A | 0.04761904762 | 0.04761904762 | 0.05555555556 |  | 0.7          | #DIV/0! |
| IIR548A | 0.09523809524 | 0.09523809524 | 0.1111111111  |  | 0.6842105263 | #DIV/0! |
| IR548A  | 0.09523809524 | 0.09523809524 | 0.1666666667  |  | 0.4210526316 | #DIV/0! |
| IIR548A | 0.09523809524 | 0.09523809524 | 0.05555555556 |  | 1.473684211  | #DIV/0! |
| IIR548A | 0.09523809524 | 0.09523809524 | 0.1666666667  |  | 0.4210526316 | #DIV/0! |
| IR548A  | 0.04761904762 | 0.04761904762 | 0.1111111111  |  | 0.325        | #DIV/0! |
| IR548A  | 0.04761904762 | 0.04761904762 | 0             |  | inf          | #DIV/0! |
| IR548A  | 0.09523809524 | 0.09523809524 | 0             |  | inf          | #DIV/0! |
| IIR548A | 0.09523809524 | 0.09523809524 | 0.1666666667  |  | 0.4210526316 | #DIV/0! |
| IIR548B | 0             | 0             | 0.05555555556 |  | 0            | #DIV/0! |
| IIR548B | 0.04761904762 | 0.04761904762 | 0             |  | inf          | #DIV/0! |
| IIR548C | 0.1428571429  | 0.1428571429  | 0.05555555556 |  | 2.333333333  | #DIV/0! |
| IIR548D | 0.1428571429  | 0.1428571429  | 0.1111111111  |  | 1.083333333  | #DIV/0! |
| IIR548D | 0             | 0             | 0             |  |              | #DIV/0! |
| MIR548I | 0.1428571429  | 0.1428571429  | 0.05555555556 |  | 2.333333333  | #DIV/0! |
| IIR548F | 0.09523809524 | 0.09523809524 | 0.05555555556 |  | 1.473684211  | #DIV/0! |
| IIR548F | 0             | 0             | 0.05555555556 |  | 0            | #DIV/0! |
| IIR548F | 0.1904761905  | 0.1904761905  | 0.05555555556 |  | 3.294117647  | #DIV/0! |
| IIR548F | 0.09523809524 | 0.09523809524 | 0.05555555556 |  | 1.473684211  | #DIV/0! |
| IIR548C | 0             | 0             | 0.05555555556 |  | 0            | #DIV/0! |
| IIR548H | 0.09523809524 | 0.09523809524 | 0             |  | inf          | #DIV/0! |
| IIR548H | 0.04761904762 | 0.04761904762 | 0             |  | inf          | #DIV/0! |
| IIR548H | 0.04761904762 | 0.04761904762 | 0.1111111111  |  | 0.325        | #DIV/0! |
| IIR548H | 0.04761904762 | 0.04761904762 | 0.1111111111  |  | 0.325        | #DIV/0! |
| IIR548I | 0.04761904762 | 0.04761904762 | 0.05555555556 |  | 0.7          | #DIV/0! |
| IIR548I | 0.09523809524 | 0.09523809524 | 0.1666666667  |  | 0.4210526316 | #DIV/0! |
| MIR548J | 0.04761904762 | 0.04761904762 | 0.05555555556 |  | 0.7          | #DIV/0! |
| IIR548N | 0.09523809524 | 0.09523809524 | 0.2222222222  |  | 0.2894736842 | #DIV/0! |
| IIR548C | 0.04761904762 | 0.04761904762 | 0.05555555556 |  | 0.7          | #DIV/0! |
| IIR548O | 0.1428571429  | 0.1428571429  | 0.1666666667  |  | 0.6666666667 | #DIV/0! |
| MIR548I | 0.04761904762 | 0.04761904762 | 0             |  | inf          | #DIV/0! |
| IIR548C | 0.09523809524 | 0.09523809524 | 0.1111111111  |  | 0.6842105263 | #DIV/0! |
| MIR548S | 0             | 0             | 0.05555555556 |  | 0            | #DIV/0! |

|         |               |               |               |  |              |         |
|---------|---------------|---------------|---------------|--|--------------|---------|
| MIR5481 | 0             | 0             | 0.05555555556 |  | 0            | #DIV/0! |
| MIR5481 | 0.04761904762 | 0.04761904762 | 0.05555555556 |  | 0.7          | #DIV/0! |
| MIR548V | 0.09523809524 | 0.09523809524 | 0.11111111111 |  | 0.6842105263 | #DIV/0! |
| MIR548V | 0.04761904762 | 0.04761904762 | 0             |  | inf          | #DIV/0! |
| MIR548X | 0.04761904762 | 0.04761904762 | 0.11111111111 |  | 0.325        | #DIV/0! |
| MIR548X | 0.04761904762 | 0.04761904762 | 0.11111111111 |  | 0.325        | #DIV/0! |
| MIR548Y | 0.04761904762 | 0.04761904762 | 0             |  | inf          | #DIV/0! |
| MIR548Z | 0.1428571429  | 0.1428571429  | 0.05555555556 |  | 2.333333333  | #DIV/0! |
| MIR549A | 0.04761904762 | 0.04761904762 | 0.05555555556 |  | 0.7          | #DIV/0! |
| MIR550A | 0.04761904762 | 0.04761904762 | 0.16666666667 |  | 0.2          | #DIV/0! |
| MIR550A | 0.04761904762 | 0.04761904762 | 0.16666666667 |  | 0.2          | #DIV/0! |
| MIR550A | 0.04761904762 | 0.04761904762 | 0.16666666667 |  | 0.2          | #DIV/0! |
| MIR550B | 0.04761904762 | 0.04761904762 | 0.16666666667 |  | 0.2          | #DIV/0! |
| MIR550B | 0.04761904762 | 0.04761904762 | 0.16666666667 |  | 0.2          | #DIV/0! |
| MIR551A | 0             | 0             | 0.05555555556 |  | 0            | #DIV/0! |
| MIR551B | 0.1428571429  | 0.1428571429  | 0.05555555556 |  | 2.333333333  | #DIV/0! |
| MIR552  | 0.04761904762 | 0.04761904762 | 0             |  | inf          | #DIV/0! |
| MIR553  | 0.04761904762 | 0.04761904762 | 0.05555555556 |  | 0.7          | #DIV/0! |
| MIR554  | 0.1428571429  | 0.1428571429  | 0.05555555556 |  | 2.333333333  | #DIV/0! |
| MIR555  | 0.1904761905  | 0.1904761905  | 0.11111111111 |  | 1.529411765  | #DIV/0! |
| MIR556  | 0.1428571429  | 0.1428571429  | 0             |  | inf          | #DIV/0! |
| MIR557  | 0.1428571429  | 0.1428571429  | 0             |  | inf          | #DIV/0! |
| MIR557Z | 0.04761904762 | 0.04761904762 | 0.05555555556 |  | 0.7          | #DIV/0! |
| MIR558  | 0.1428571429  | 0.1428571429  | 0             |  | inf          | #DIV/0! |
| MIR558C | 0.04761904762 | 0.04761904762 | 0             |  | inf          | #DIV/0! |
| MIR558D | 0.04761904762 | 0.04761904762 | 0.05555555556 |  | 0.7          | #DIV/0! |
| MIR558E | 0             | 0             | 0.05555555556 |  | 0            | #DIV/0! |
| MIR558F | 0.09523809524 | 0.09523809524 | 0             |  | inf          | #DIV/0! |
| MIR558G | 0.09523809524 | 0.09523809524 | 0             |  | inf          | #DIV/0! |
| MIR558H | 0.04761904762 | 0.04761904762 | 0.05555555556 |  | 0.7          | #DIV/0! |
| MIR558I | 0.04761904762 | 0.04761904762 | 0.11111111111 |  | 0.325        | #DIV/0! |
| MIR558J | 0.04761904762 | 0.04761904762 | 0.22222222222 |  | 0.1375       | #DIV/0! |
| MIR558K | 0.1428571429  | 0.1428571429  | 0.05555555556 |  | 2.333333333  | #DIV/0! |
| MIR558L | 0.1428571429  | 0.1428571429  | 0.11111111111 |  | 1.083333333  | #DIV/0! |
| MIR559  | 0             | 0             | 0.05555555556 |  | 0            | #DIV/0! |
| MIR559C | 0.04761904762 | 0.04761904762 | 0.05555555556 |  | 0.7          | #DIV/0! |
| MIR559D | 0.1904761905  | 0.1904761905  | 0.05555555556 |  | 3.294117647  | #DIV/0! |
| MIR561  | 0             | 0             | 0.05555555556 |  | 0            | #DIV/0! |
| MIR562  | 0             | 0             | 0.05555555556 |  | 0            | #DIV/0! |
| MIR563  | 0.04761904762 | 0.04761904762 | 0             |  | inf          | #DIV/0! |
| MIR567  | 0.09523809524 | 0.09523809524 | 0.05555555556 |  | 1.473684211  | #DIV/0! |
| MIR568  | 0.09523809524 | 0.09523809524 | 0.05555555556 |  | 1.473684211  | #DIV/0! |
| MIR568C | 0.1904761905  | 0.1904761905  | 0.11111111111 |  | 1.529411765  | #DIV/0! |
| MIR568D | 0.1904761905  | 0.1904761905  | 0.11111111111 |  | 1.529411765  | #DIV/0! |
| MIR568E | 0.1904761905  | 0.1904761905  | 0.11111111111 |  | 1.529411765  | #DIV/0! |
| MIR568F | 0.1428571429  | 0.1428571429  | 0.05555555556 |  | 2.333333333  | #DIV/0! |
| MIR568G | 0.1428571429  | 0.1428571429  | 0.11111111111 |  | 1.083333333  | #DIV/0! |
| MIR568H | 0.04761904762 | 0.04761904762 | 0             |  | inf          | #DIV/0! |
| MIR568I | 0.04761904762 | 0.04761904762 | 0.05555555556 |  | 0.7          | #DIV/0! |
| MIR568J | 0.04761904762 | 0.04761904762 | 0             |  | inf          | #DIV/0! |
| MIR569  | 0.1904761905  | 0.1904761905  | 0.05555555556 |  | 3.294117647  | #DIV/0! |

|          |               |               |               |  |              |         |
|----------|---------------|---------------|---------------|--|--------------|---------|
| MIR5690  | 0.04761904762 | 0.04761904762 | 0.05555555556 |  | 0.7          | #DIV/0! |
| IR5692A  | 0.1428571429  | 0.1428571429  | 0.1111111111  |  | 1.083333333  | #DIV/0! |
| IR5692A  | 0.1428571429  | 0.1428571429  | 0.1111111111  |  | 1.083333333  | #DIV/0! |
| IIR56920 | 0.04761904762 | 0.04761904762 | 0.1666666667  |  | 0.2          | #DIV/0! |
| IR56920  | 0.04761904762 | 0.04761904762 | 0             |  | inf          | #DIV/0! |
| IR56920  | 0.04761904762 | 0.04761904762 | 0.05555555556 |  | 0.7          | #DIV/0! |
| MIR5695  | 0.1428571429  | 0.1428571429  | 0.1111111111  |  | 1.083333333  | #DIV/0! |
| MIR5696  | 0             | 0             | 0.05555555556 |  | 0            | #DIV/0! |
| MIR5697  | 0             | 0             | 0.1111111111  |  | 0            | #DIV/0! |
| MIR5698  | 0.1904761905  | 0.1904761905  | 0.05555555556 |  | 3.294117647  | #DIV/0! |
| MIR5699  | 0.04761904762 | 0.04761904762 | 0.1111111111  |  | 0.325        | #DIV/0! |
| MIR570   | 0.1428571429  | 0.1428571429  | 0.05555555556 |  | 2.333333333  | #DIV/0! |
| MIR5700  | 0.04761904762 | 0.04761904762 | 0.05555555556 |  | 0.7          | #DIV/0! |
| IR5701-  | 0.2857142857  | 0.2857142857  | 0.1111111111  |  | 2.6          | #DIV/0! |
| IR5701-  | 0.2857142857  | 0.2857142857  | 0.1111111111  |  | 2.6          | #DIV/0! |
| IR5701-  | 0.2857142857  | 0.2857142857  | 0.1111111111  |  | 2.6          | #DIV/0! |
| MIR5702  | 0             | 0             | 0.05555555556 |  | 0            | #DIV/0! |
| MIR5703  | 0             | 0             | 0.05555555556 |  | 0            | #DIV/0! |
| MIR5704  | 0.09523809524 | 0.09523809524 | 0.05555555556 |  | 1.473684211  | #DIV/0! |
| MIR5705  | 0             | 0             | 0.05555555556 |  | 0            | #DIV/0! |
| MIR5706  | 0.04761904762 | 0.04761904762 | 0             |  | inf          | #DIV/0! |
| MIR5707  | 0.1428571429  | 0.1428571429  | 0.05555555556 |  | 2.333333333  | #DIV/0! |
| MIR5708  | 0.1428571429  | 0.1428571429  | 0.1111111111  |  | 1.083333333  | #DIV/0! |
| IR570H   | 0.1428571429  | 0.1428571429  | 0.05555555556 |  | 2.333333333  | #DIV/0! |
| MIR5710  | 0.04761904762 | 0.04761904762 | 0             |  | inf          | #DIV/0! |
| MIR572   | 0             | 0             | 0             |  |              | #DIV/0! |
| MIR5739  | 0.04761904762 | 0.04761904762 | 0.1111111111  |  | 0.325        | #DIV/0! |
| MIR574   | 0.1428571429  | 0.1428571429  | 0.05555555556 |  | 2.333333333  | #DIV/0! |
| MIR575   | 0             | 0             | 0.05555555556 |  | 0            | #DIV/0! |
| MIR576   | 0             | 0             | 0.05555555556 |  | 0            | #DIV/0! |
| MIR577   | 0             | 0             | 0.05555555556 |  | 0            | #DIV/0! |
| MIR578   | 0             | 0             | 0.1111111111  |  | 0            | #DIV/0! |
| MIR5787  | 0.09523809524 | 0.09523809524 | 0             |  | inf          | #DIV/0! |
| MIR5790  | 0.04761904762 | 0.04761904762 | 0.05555555556 |  | 0.7          | #DIV/0! |
| MIR5800  | 0.04761904762 | 0.04761904762 | 0.05555555556 |  | 0.7          | #DIV/0! |
| MIR5810  | 0.04761904762 | 0.04761904762 | 0.05555555556 |  | 0.7          | #DIV/0! |
| MIR5820  | 0.04761904762 | 0.04761904762 | 0.05555555556 |  | 0.7          | #DIV/0! |
| MIR5830  | 0.04761904762 | 0.04761904762 | 0             |  | inf          | #DIV/0! |
| MIR585   | 0             | 0             | 0.05555555556 |  | 0            | #DIV/0! |
| MIR5860  | 0.04761904762 | 0.04761904762 | 0.1111111111  |  | 0.325        | #DIV/0! |
| MIR587   | 0             | 0             | 0             |  |              | #DIV/0! |
| MIR5890  | 0.04761904762 | 0.04761904762 | 0.1666666667  |  | 0.2          | #DIV/0! |
| MIR590   | 0.1428571429  | 0.1428571429  | 0.1111111111  |  | 1.083333333  | #DIV/0! |
| MIR5910  | 0.04761904762 | 0.04761904762 | 0.1111111111  |  | 0.325        | #DIV/0! |
| MIR5920  | 0.04761904762 | 0.04761904762 | 0.05555555556 |  | 0.7          | #DIV/0! |
| MIR5930  | 0.04761904762 | 0.04761904762 | 0.05555555556 |  | 0.7          | #DIV/0! |
| MIR595   | 0.1428571429  | 0.1428571429  | 0.05555555556 |  | 2.333333333  | #DIV/0! |
| MIR596   | 0.1428571429  | 0.1428571429  | 0.1111111111  |  | 1.083333333  | #DIV/0! |
| MIR5970  | 0.09523809524 | 0.09523809524 | 0.1111111111  |  | 0.6842105263 | #DIV/0! |
| MIR5980  | 0.09523809524 | 0.09523809524 | 0.1111111111  |  | 0.6842105263 | #DIV/0! |
| MIR599   | 0.1904761905  | 0.1904761905  | 0.1111111111  |  | 1.529411765  | #DIV/0! |

|         |               |               |               |  |              |         |
|---------|---------------|---------------|---------------|--|--------------|---------|
| MIR600  | 0.09523809524 | 0.09523809524 | 0.05555555556 |  | 1.473684211  | #DIV/0! |
| IR600H  | 0.09523809524 | 0.09523809524 | 0.05555555556 |  | 1.473684211  | #DIV/0! |
| MIR601  | 0.09523809524 | 0.09523809524 | 0.05555555556 |  | 1.473684211  | #DIV/0! |
| MIR602  | 0.09523809524 | 0.09523809524 | 0             |  | inf          | #DIV/0! |
| MIR603  | 0.09523809524 | 0.09523809524 | 0.1111111111  |  | 0.6842105263 | #DIV/0! |
| MIR604  | 0.09523809524 | 0.09523809524 | 0.2222222222  |  | 0.2894736842 | #DIV/0! |
| MIR605  | 0.04761904762 | 0.04761904762 | 0.05555555556 |  | 0.7          | #DIV/0! |
| MIR606  | 0.09523809524 | 0.09523809524 | 0.05555555556 |  | 1.473684211  | #DIV/0! |
| MIR6068 | 0.04761904762 | 0.04761904762 | 0.05555555556 |  | 0.7          | #DIV/0! |
| MIR6069 | 0             | 0             | 0.1111111111  |  | 0            | #DIV/0! |
| MIR607  | 0.1428571429  | 0.1428571429  | 0             |  | inf          | #DIV/0! |
| MIR6070 | 0.04761904762 | 0.04761904762 | 0.1666666667  |  | 0.2          | #DIV/0! |
| MIR6071 | 0             | 0             | 0.05555555556 |  | 0            | #DIV/0! |
| MIR6072 | 0             | 0             | 0.1111111111  |  | 0            | #DIV/0! |
| MIR6074 | 0.09523809524 | 0.09523809524 | 0.05555555556 |  | 1.473684211  | #DIV/0! |
| MIR6075 | 0             | 0             | 0.1111111111  |  | 0            | #DIV/0! |
| MIR6076 | 0.04761904762 | 0.04761904762 | 0             |  | inf          | #DIV/0! |
| MIR6077 | 0.1428571429  | 0.1428571429  | 0.05555555556 |  | 2.333333333  | #DIV/0! |
| MIR6078 | 0.04761904762 | 0.04761904762 | 0.1666666667  |  | 0.2          | #DIV/0! |
| MIR6079 | 0.04761904762 | 0.04761904762 | 0.05555555556 |  | 0.7          | #DIV/0! |
| MIR608  | 0.1428571429  | 0.1428571429  | 0             |  | inf          | #DIV/0! |
| MIR6080 | 0.04761904762 | 0.04761904762 | 0             |  | inf          | #DIV/0! |
| MIR6081 | 0.04761904762 | 0.04761904762 | 0.05555555556 |  | 0.7          | #DIV/0! |
| MIR6082 | 0             | 0             | 0.05555555556 |  | 0            | #DIV/0! |
| MIR6083 | 0.04761904762 | 0.04761904762 | 0.05555555556 |  | 0.7          | #DIV/0! |
| MIR6084 | 0.04761904762 | 0.04761904762 | 0.1111111111  |  | 0.325        | #DIV/0! |
| MIR6085 | 0.04761904762 | 0.04761904762 | 0.05555555556 |  | 0.7          | #DIV/0! |
| MIR6088 | 0.09523809524 | 0.09523809524 | 0.1111111111  |  | 0.6842105263 | #DIV/0! |
| MIR609  | 0.1428571429  | 0.1428571429  | 0.05555555556 |  | 2.333333333  | #DIV/0! |
| MIR6125 | 0.09523809524 | 0.09523809524 | 0             |  | inf          | #DIV/0! |
| MIR6126 | 0.04761904762 | 0.04761904762 | 0.1111111111  |  | 0.325        | #DIV/0! |
| MIR6127 | 0.04761904762 | 0.04761904762 | 0.1111111111  |  | 0.325        | #DIV/0! |
| MIR6129 | 0.1428571429  | 0.1428571429  | 0             |  | inf          | #DIV/0! |
| MIR613  | 0.04761904762 | 0.04761904762 | 0.05555555556 |  | 0.7          | #DIV/0! |
| MIR6130 | 0.04761904762 | 0.04761904762 | 0.1111111111  |  | 0.325        | #DIV/0! |
| MIR6131 | 0.04761904762 | 0.04761904762 | 0.05555555556 |  | 0.7          | #DIV/0! |
| MIR6132 | 0.09523809524 | 0.09523809524 | 0.1666666667  |  | 0.4210526316 | #DIV/0! |
| MIR6133 | 0.04761904762 | 0.04761904762 | 0.05555555556 |  | 0.7          | #DIV/0! |
| MIR614  | 0.04761904762 | 0.04761904762 | 0.05555555556 |  | 0.7          | #DIV/0! |
| MIR615  | 0.04761904762 | 0.04761904762 | 0.05555555556 |  | 0.7          | #DIV/0! |
| MIR6165 | 0.09523809524 | 0.09523809524 | 0             |  | inf          | #DIV/0! |
| MIR617  | 0.04761904762 | 0.04761904762 | 0.05555555556 |  | 0.7          | #DIV/0! |
| MIR618  | 0.04761904762 | 0.04761904762 | 0.05555555556 |  | 0.7          | #DIV/0! |
| MIR619  | 0             | 0             | 0.05555555556 |  | 0            | #DIV/0! |
| MIR620  | 0             | 0             | 0.05555555556 |  | 0            | #DIV/0! |
| MIR624  | 0             | 0             | 0             |  |              | #DIV/0! |
| MIR628  | 0.04761904762 | 0.04761904762 | 0.05555555556 |  | 0.7          | #DIV/0! |
| MIR629  | 0.04761904762 | 0.04761904762 | 0.05555555556 |  | 0.7          | #DIV/0! |
| MIR630  | 0.04761904762 | 0.04761904762 | 0.05555555556 |  | 0.7          | #DIV/0! |
| MIR631  | 0.04761904762 | 0.04761904762 | 0.05555555556 |  | 0.7          | #DIV/0! |
| MIR632  | 0             | 0             | 0             |  |              | #DIV/0! |

|          |               |               |               |  |              |         |
|----------|---------------|---------------|---------------|--|--------------|---------|
| MIR633   | 0.04761904762 | 0.04761904762 | 0             |  | inf          | #DIV/0! |
| MIR634   | 0             | 0             | 0             |  |              | #DIV/0! |
| MIR635   | 0             | 0             | 0             |  |              | #DIV/0! |
| MIR636   | 0.04761904762 | 0.04761904762 | 0             |  | inf          | #DIV/0! |
| MIR637   | 0.09523809524 | 0.09523809524 | 0.05555555556 |  | 1.473684211  | #DIV/0! |
| MIR638   | 0.1428571429  | 0.1428571429  | 0.1111111111  |  | 1.083333333  | #DIV/0! |
| MIR639   | 0.1428571429  | 0.1428571429  | 0.1111111111  |  | 1.083333333  | #DIV/0! |
| MIR640   | 0.1428571429  | 0.1428571429  | 0.1111111111  |  | 1.083333333  | #DIV/0! |
| MIR641   | 0.04761904762 | 0.04761904762 | 0.05555555556 |  | 0.7          | #DIV/0! |
| MIR642   | 0.09523809524 | 0.09523809524 | 0.1111111111  |  | 0.6842105263 | #DIV/0! |
| MIR642H  | 0.09523809524 | 0.09523809524 | 0.1111111111  |  | 0.6842105263 | #DIV/0! |
| MIR643   | 0.09523809524 | 0.09523809524 | 0.05555555556 |  | 1.473684211  | #DIV/0! |
| MIR644   | 0.09523809524 | 0.09523809524 | 0.1111111111  |  | 0.6842105263 | #DIV/0! |
| MIR645   | 0.09523809524 | 0.09523809524 | 0.1666666667  |  | 0.4210526316 | #DIV/0! |
| MIR646   | 0.1428571429  | 0.1428571429  | 0.1111111111  |  | 1.083333333  | #DIV/0! |
| MIR646H  | 0.1428571429  | 0.1428571429  | 0.1666666667  |  | 0.6666666667 | #DIV/0! |
| MIR647   | 0.1428571429  | 0.1428571429  | 0.2222222222  |  | 0.4583333333 | #DIV/0! |
| MIR648   | 0.04761904762 | 0.04761904762 | 0.05555555556 |  | 0.7          | #DIV/0! |
| MIR649   | 0.04761904762 | 0.04761904762 | 0.05555555556 |  | 0.7          | #DIV/0! |
| MIR650   | 0             | 0             | 0.05555555556 |  | 0            | #DIV/0! |
| MIR6500  | 0.04761904762 | 0.04761904762 | 0.05555555556 |  | 0.7          | #DIV/0! |
| MIR6501  | 0.04761904762 | 0.04761904762 | 0.1111111111  |  | 0.325        | #DIV/0! |
| MIR6502  | 0.09523809524 | 0.09523809524 | 0.05555555556 |  | 1.473684211  | #DIV/0! |
| MIR6504  | 0.04761904762 | 0.04761904762 | 0             |  | inf          | #DIV/0! |
| MIR6505  | 0.04761904762 | 0.04761904762 | 0.05555555556 |  | 0.7          | #DIV/0! |
| MIR6506  | 0.04761904762 | 0.04761904762 | 0             |  | inf          | #DIV/0! |
| MIR6507  | 0.1428571429  | 0.1428571429  | 0             |  | inf          | #DIV/0! |
| MIR6508  | 0.04761904762 | 0.04761904762 | 0.05555555556 |  | 0.7          | #DIV/0! |
| MIR6509  | 0.04761904762 | 0.04761904762 | 0.05555555556 |  | 0.7          | #DIV/0! |
| MIR6510  | 0.09523809524 | 0.09523809524 | 0             |  | inf          | #DIV/0! |
| MIR6511A | 0.09523809524 | 0.09523809524 | 0             |  | inf          | #DIV/0! |
| MIR6511B | 0.09523809524 | 0.09523809524 | 0             |  | inf          | #DIV/0! |
| MIR6511C | 0.09523809524 | 0.09523809524 | 0             |  | inf          | #DIV/0! |
| MIR6511D | 0.09523809524 | 0.09523809524 | 0             |  | inf          | #DIV/0! |
| MIR6511E | 0.09523809524 | 0.09523809524 | 0.2222222222  |  | 0.2894736842 | #DIV/0! |
| MIR6511F | 0.09523809524 | 0.09523809524 | 0.2222222222  |  | 0.2894736842 | #DIV/0! |
| MIR6512  | 0             | 0             | 0.1111111111  |  | 0            | #DIV/0! |
| MIR6513  | 0             | 0             | 0.05555555556 |  | 0            | #DIV/0! |
| MIR6515  | 0.1428571429  | 0.1428571429  | 0.1111111111  |  | 1.083333333  | #DIV/0! |
| MIR6516  | 0.04761904762 | 0.04761904762 | 0             |  | inf          | #DIV/0! |
| MIR653   | 0.04761904762 | 0.04761904762 | 0.1111111111  |  | 0.325        | #DIV/0! |
| MIR657   | 0.04761904762 | 0.04761904762 | 0             |  | inf          | #DIV/0! |
| MIR658   | 0             | 0             | 0.1111111111  |  | 0            | #DIV/0! |
| MIR659   | 0             | 0             | 0.1111111111  |  | 0            | #DIV/0! |
| MIR661   | 0.04761904762 | 0.04761904762 | 0.1666666667  |  | 0.2          | #DIV/0! |
| MIR662   | 0.04761904762 | 0.04761904762 | 0.2222222222  |  | 0.1375       | #DIV/0! |
| MIR663A  | 0.1904761905  | 0.1904761905  | 0.05555555556 |  | 3.294117647  | #DIV/0! |
| MIR663B  | 0.1904761905  | 0.1904761905  | 0.05555555556 |  | 3.294117647  | #DIV/0! |
| MIR663E  | 0             | 0             | 0.05555555556 |  | 0            | #DIV/0! |
| MIR664A  | 0.1428571429  | 0.1428571429  | 0.05555555556 |  | 2.333333333  | #DIV/0! |
| MIR671   | 0.09523809524 | 0.09523809524 | 0.05555555556 |  | 1.473684211  | #DIV/0! |

|         |               |               |               |  |              |         |
|---------|---------------|---------------|---------------|--|--------------|---------|
| IIR6715 | 0.1428571429  | 0.1428571429  | 0.05555555556 |  | 2.333333333  | #DIV/0! |
| IIR6715 | 0.1428571429  | 0.1428571429  | 0.05555555556 |  | 2.333333333  | #DIV/0! |
| MIR6718 | 0.09523809524 | 0.09523809524 | 0             |  | inf          | #DIV/0! |
| MIR6719 | 0.04761904762 | 0.04761904762 | 0.05555555556 |  | 0.7          | #DIV/0! |
| MIR6720 | 0.04761904762 | 0.04761904762 | 0             |  | inf          | #DIV/0! |
| MIR6722 | 0.1428571429  | 0.1428571429  | 0.05555555556 |  | 2.333333333  | #DIV/0! |
| MIR6726 | 0             | 0             | 0.1111111111  |  | 0            | #DIV/0! |
| MIR6727 | 0             | 0             | 0.1111111111  |  | 0            | #DIV/0! |
| MIR6728 | 0             | 0             | 0.05555555556 |  | 0            | #DIV/0! |
| MIR6729 | 0.04761904762 | 0.04761904762 | 0.1111111111  |  | 0.325        | #DIV/0! |
| MIR6730 | 0.09523809524 | 0.09523809524 | 0.1111111111  |  | 0.6842105263 | #DIV/0! |
| MIR6731 | 0.04761904762 | 0.04761904762 | 0.1111111111  |  | 0.325        | #DIV/0! |
| MIR6732 | 0.04761904762 | 0.04761904762 | 0.05555555556 |  | 0.7          | #DIV/0! |
| MIR6733 | 0.04761904762 | 0.04761904762 | 0.05555555556 |  | 0.7          | #DIV/0! |
| MIR6734 | 0.04761904762 | 0.04761904762 | 0.05555555556 |  | 0.7          | #DIV/0! |
| MIR6735 | 0.04761904762 | 0.04761904762 | 0.05555555556 |  | 0.7          | #DIV/0! |
| MIR6736 | 0.1428571429  | 0.1428571429  | 0.05555555556 |  | 2.333333333  | #DIV/0! |
| MIR6737 | 0.1904761905  | 0.1904761905  | 0.05555555556 |  | 3.294117647  | #DIV/0! |
| MIR6738 | 0.1428571429  | 0.1428571429  | 0.1111111111  |  | 1.083333333  | #DIV/0! |
| MIR6739 | 0.1428571429  | 0.1428571429  | 0             |  | inf          | #DIV/0! |
| MIR6740 | 0.1428571429  | 0.1428571429  | 0             |  | inf          | #DIV/0! |
| MIR6741 | 0.1428571429  | 0.1428571429  | 0.05555555556 |  | 2.333333333  | #DIV/0! |
| MIR6742 | 0.1428571429  | 0.1428571429  | 0             |  | inf          | #DIV/0! |
| MIR6743 | 0.04761904762 | 0.04761904762 | 0             |  | inf          | #DIV/0! |
| MIR6744 | 0.04761904762 | 0.04761904762 | 0             |  | inf          | #DIV/0! |
| MIR6745 | 0             | 0             | 0.05555555556 |  | 0            | #DIV/0! |
| MIR6750 | 0.04761904762 | 0.04761904762 | 0             |  | inf          | #DIV/0! |
| MIR6757 | 0.04761904762 | 0.04761904762 | 0.05555555556 |  | 0.7          | #DIV/0! |
| MIR6759 | 0.1428571429  | 0.1428571429  | 0.05555555556 |  | 2.333333333  | #DIV/0! |
| MIR6760 | 0             | 0             | 0.1111111111  |  | 0            | #DIV/0! |
| MIR6761 | 0             | 0             | 0.1111111111  |  | 0            | #DIV/0! |
| MIR6762 | 0             | 0             | 0.05555555556 |  | 0            | #DIV/0! |
| MIR6763 | 0.09523809524 | 0.09523809524 | 0.05555555556 |  | 1.473684211  | #DIV/0! |
| MIR6766 | 0.04761904762 | 0.04761904762 | 0.05555555556 |  | 0.7          | #DIV/0! |
| MIR6767 | 0.09523809524 | 0.09523809524 | 0.2222222222  |  | 0.2894736842 | #DIV/0! |
| MIR6768 | 0.09523809524 | 0.09523809524 | 0.2222222222  |  | 0.2894736842 | #DIV/0! |
| IIR6769 | 0.04761904762 | 0.04761904762 | 0             |  | inf          | #DIV/0! |
| IIR6769 | 0.1428571429  | 0.1428571429  | 0             |  | inf          | #DIV/0! |
| IIR6770 | 0.09523809524 | 0.09523809524 | 0             |  | inf          | #DIV/0! |
| IIR6770 | 0.09523809524 | 0.09523809524 | 0             |  | inf          | #DIV/0! |
| IIR6770 | 0.09523809524 | 0.09523809524 | 0             |  | inf          | #DIV/0! |
| MIR6771 | 0.04761904762 | 0.04761904762 | 0             |  | inf          | #DIV/0! |
| MIR6772 | 0.04761904762 | 0.04761904762 | 0             |  | inf          | #DIV/0! |
| MIR6773 | 0.1428571429  | 0.1428571429  | 0.05555555556 |  | 2.333333333  | #DIV/0! |
| MIR6774 | 0.04761904762 | 0.04761904762 | 0             |  | inf          | #DIV/0! |
| MIR6775 | 0.04761904762 | 0.04761904762 | 0             |  | inf          | #DIV/0! |
| MIR6776 | 0             | 0             | 0.1111111111  |  | 0            | #DIV/0! |
| MIR6777 | 0.04761904762 | 0.04761904762 | 0.1111111111  |  | 0.325        | #DIV/0! |
| MIR6778 | 0.04761904762 | 0.04761904762 | 0.1111111111  |  | 0.325        | #DIV/0! |
| MIR6779 | 0.09523809524 | 0.09523809524 | 0             |  | inf          | #DIV/0! |
| IIR6780 | 0.04761904762 | 0.04761904762 | 0             |  | inf          | #DIV/0! |

|         |               |               |               |  |              |         |
|---------|---------------|---------------|---------------|--|--------------|---------|
| MIR6780 | 0.04761904762 | 0.04761904762 | 0.05555555556 |  | 0.7          | #DIV/0! |
| MIR6781 | 0.04761904762 | 0.04761904762 | 0             |  | inf          | #DIV/0! |
| MIR6782 | 0.09523809524 | 0.09523809524 | 0             |  | inf          | #DIV/0! |
| MIR6783 | 0.1428571429  | 0.1428571429  | 0             |  | inf          | #DIV/0! |
| MIR6784 | 0.1428571429  | 0.1428571429  | 0             |  | inf          | #DIV/0! |
| MIR6786 | 0.04761904762 | 0.04761904762 | 0             |  | inf          | #DIV/0! |
| MIR6787 | 0.04761904762 | 0.04761904762 | 0             |  | inf          | #DIV/0! |
| MIR6788 | 0.09523809524 | 0.09523809524 | 0             |  | inf          | #DIV/0! |
| MIR6789 | 0.09523809524 | 0.09523809524 | 0.1111111111  |  | 0.6842105263 | #DIV/0! |
| MIR6790 | 0.1428571429  | 0.1428571429  | 0.05555555556 |  | 2.333333333  | #DIV/0! |
| MIR6791 | 0.1428571429  | 0.1428571429  | 0.05555555556 |  | 2.333333333  | #DIV/0! |
| MIR6792 | 0.1428571429  | 0.1428571429  | 0.05555555556 |  | 2.333333333  | #DIV/0! |
| MIR6793 | 0.1428571429  | 0.1428571429  | 0.1111111111  |  | 1.083333333  | #DIV/0! |
| MIR6794 | 0.1428571429  | 0.1428571429  | 0.1111111111  |  | 1.083333333  | #DIV/0! |
| MIR6795 | 0.1428571429  | 0.1428571429  | 0.1111111111  |  | 1.083333333  | #DIV/0! |
| MIR6796 | 0.04761904762 | 0.04761904762 | 0.05555555556 |  | 0.7          | #DIV/0! |
| MIR6797 | 0.04761904762 | 0.04761904762 | 0.05555555556 |  | 0.7          | #DIV/0! |
| MIR6798 | 0.09523809524 | 0.09523809524 | 0.1111111111  |  | 0.6842105263 | #DIV/0! |
| MIR6799 | 0.09523809524 | 0.09523809524 | 0.1111111111  |  | 0.6842105263 | #DIV/0! |
| MIR6800 | 0.09523809524 | 0.09523809524 | 0.1111111111  |  | 0.6842105263 | #DIV/0! |
| MIR6801 | 0.09523809524 | 0.09523809524 | 0.05555555556 |  | 1.473684211  | #DIV/0! |
| MIR6802 | 0.09523809524 | 0.09523809524 | 0.05555555556 |  | 1.473684211  | #DIV/0! |
| MIR6803 | 0.09523809524 | 0.09523809524 | 0.05555555556 |  | 1.473684211  | #DIV/0! |
| MIR6804 | 0.09523809524 | 0.09523809524 | 0.05555555556 |  | 1.473684211  | #DIV/0! |
| MIR6805 | 0.09523809524 | 0.09523809524 | 0.05555555556 |  | 1.473684211  | #DIV/0! |
| MIR6806 | 0.1428571429  | 0.1428571429  | 0.05555555556 |  | 2.333333333  | #DIV/0! |
| MIR6807 | 0.1428571429  | 0.1428571429  | 0.05555555556 |  | 2.333333333  | #DIV/0! |
| MIR6808 | 0             | 0             | 0.1111111111  |  | 0            | #DIV/0! |
| MIR6809 | 0             | 0             | 0.1111111111  |  | 0            | #DIV/0! |
| MIR6810 | 0             | 0             | 0.05555555556 |  | 0            | #DIV/0! |
| MIR6811 | 0             | 0             | 0.05555555556 |  | 0            | #DIV/0! |
| MIR6812 | 0.1428571429  | 0.1428571429  | 0.1666666667  |  | 0.666666667  | #DIV/0! |
| MIR6813 | 0.1428571429  | 0.1428571429  | 0.2222222222  |  | 0.4583333333 | #DIV/0! |
| MIR6814 | 0.04761904762 | 0.04761904762 | 0.1111111111  |  | 0.325        | #DIV/0! |
| MIR6815 | 0.04761904762 | 0.04761904762 | 0.1111111111  |  | 0.325        | #DIV/0! |
| MIR6816 | 0.04761904762 | 0.04761904762 | 0.05555555556 |  | 0.7          | #DIV/0! |
| MIR6817 | 0.04761904762 | 0.04761904762 | 0.05555555556 |  | 0.7          | #DIV/0! |
| MIR6818 | 0.04761904762 | 0.04761904762 | 0.1111111111  |  | 0.325        | #DIV/0! |
| MIR6819 | 0             | 0             | 0.1111111111  |  | 0            | #DIV/0! |
| MIR6820 | 0             | 0             | 0.1111111111  |  | 0            | #DIV/0! |
| MIR6821 | 0             | 0             | 0.1111111111  |  | 0            | #DIV/0! |
| MIR6822 | 0.04761904762 | 0.04761904762 | 0             |  | inf          | #DIV/0! |
| MIR6823 | 0.09523809524 | 0.09523809524 | 0             |  | inf          | #DIV/0! |
| MIR6824 | 0.09523809524 | 0.09523809524 | 0             |  | inf          | #DIV/0! |
| MIR6825 | 0.09523809524 | 0.09523809524 | 0.05555555556 |  | 1.473684211  | #DIV/0! |
| MIR6826 | 0.09523809524 | 0.09523809524 | 0.05555555556 |  | 1.473684211  | #DIV/0! |
| MIR6827 | 0.1428571429  | 0.1428571429  | 0.05555555556 |  | 2.333333333  | #DIV/0! |
| MIR6828 | 0.1904761905  | 0.1904761905  | 0.05555555556 |  | 3.294117647  | #DIV/0! |
| MIR6829 | 0.1428571429  | 0.1428571429  | 0.05555555556 |  | 2.333333333  | #DIV/0! |
| MIR6830 | 0.04761904762 | 0.04761904762 | 0             |  | inf          | #DIV/0! |
| MIR6831 | 0.04761904762 | 0.04761904762 | 0             |  | inf          | #DIV/0! |



|         |               |               |               |  |              |         |
|---------|---------------|---------------|---------------|--|--------------|---------|
| MIR6832 | 0.04761904762 | 0.04761904762 | 0             |  | inf          | #DIV/0! |
| MIR6833 | 0.04761904762 | 0.04761904762 | 0             |  | inf          | #DIV/0! |
| MIR6835 | 0.04761904762 | 0.04761904762 | 0             |  | inf          | #DIV/0! |
| MIR6836 | 0.04761904762 | 0.04761904762 | 0.1666666667  |  | 0.2          | #DIV/0! |
| MIR6837 | 0.04761904762 | 0.04761904762 | 0.1666666667  |  | 0.2          | #DIV/0! |
| MIR6838 | 0.04761904762 | 0.04761904762 | 0.1666666667  |  | 0.2          | #DIV/0! |
| MIR6839 | 0.04761904762 | 0.04761904762 | 0.05555555556 |  | 0.7          | #DIV/0! |
| MIR6840 | 0.04761904762 | 0.04761904762 | 0.05555555556 |  | 0.7          | #DIV/0! |
| MIR6841 | 0.04761904762 | 0.04761904762 | 0.1111111111  |  | 0.325        | #DIV/0! |
| MIR6842 | 0.04761904762 | 0.04761904762 | 0.1111111111  |  | 0.325        | #DIV/0! |
| MIR6843 | 0.04761904762 | 0.04761904762 | 0.1111111111  |  | 0.325        | #DIV/0! |
| MIR6844 | 0.1428571429  | 0.1428571429  | 0.1111111111  |  | 1.083333333  | #DIV/0! |
| MIR6845 | 0.04761904762 | 0.04761904762 | 0.1666666667  |  | 0.2          | #DIV/0! |
| MIR6846 | 0.04761904762 | 0.04761904762 | 0.1666666667  |  | 0.2          | #DIV/0! |
| MIR6847 | 0.04761904762 | 0.04761904762 | 0.1666666667  |  | 0.2          | #DIV/0! |
| MIR6848 | 0.04761904762 | 0.04761904762 | 0.1666666667  |  | 0.2          | #DIV/0! |
| MIR6849 | 0.04761904762 | 0.04761904762 | 0.1666666667  |  | 0.2          | #DIV/0! |
| MIR6850 | 0.09523809524 | 0.09523809524 | 0.2222222222  |  | 0.2894736842 | #DIV/0! |
| MIR6851 | 0.09523809524 | 0.09523809524 | 0.05555555556 |  | 1.473684211  | #DIV/0! |
| MIR6852 | 0.09523809524 | 0.09523809524 | 0.05555555556 |  | 1.473684211  | #DIV/0! |
| MIR6853 | 0.09523809524 | 0.09523809524 | 0.05555555556 |  | 1.473684211  | #DIV/0! |
| MIR6854 | 0.04761904762 | 0.04761904762 | 0             |  | inf          | #DIV/0! |
| MIR6855 | 0.09523809524 | 0.09523809524 | 0.05555555556 |  | 1.473684211  | #DIV/0! |
| MIR6856 | 0.09523809524 | 0.09523809524 | 0.05555555556 |  | 1.473684211  | #DIV/0! |
| MIR6859 | 0.09523809524 | 0.09523809524 | 0.3888888889  |  | 0.1203007519 | #DIV/0! |
| MIR6859 | 0.09523809524 | 0.09523809524 | 0.3888888889  |  | 0.1203007519 | #DIV/0! |
| MIR6859 | 0.09523809524 | 0.09523809524 | 0.3888888889  |  | 0.1203007519 | #DIV/0! |
| MIR6859 | 0.09523809524 | 0.09523809524 | 0.3888888889  |  | 0.1203007519 | #DIV/0! |
| MIR6861 | 0             | 0             | 0.1111111111  |  | 0            | #DIV/0! |
| MIR6862 | 0.04761904762 | 0.04761904762 | 0             |  | inf          | #DIV/0! |
| MIR6862 | 0.04761904762 | 0.04761904762 | 0             |  | inf          | #DIV/0! |
| MIR6863 | 0.04761904762 | 0.04761904762 | 0             |  | inf          | #DIV/0! |
| MIR6864 | 0             | 0             | 0.1111111111  |  | 0            | #DIV/0! |
| MIR6865 | 0             | 0             | 0.1111111111  |  | 0            | #DIV/0! |
| MIR6866 | 0.09523809524 | 0.09523809524 | 0             |  | inf          | #DIV/0! |
| MIR6867 | 0.09523809524 | 0.09523809524 | 0             |  | inf          | #DIV/0! |
| MIR6868 | 0.04761904762 | 0.04761904762 | 0             |  | inf          | #DIV/0! |
| MIR6869 | 0.1904761905  | 0.1904761905  | 0.1111111111  |  | 1.529411765  | #DIV/0! |
| MIR6870 | 0.1904761905  | 0.1904761905  | 0.1666666667  |  | 0.9411764706 | #DIV/0! |
| MIR6871 | 0.1428571429  | 0.1428571429  | 0.1666666667  |  | 0.6666666667 | #DIV/0! |
| MIR6872 | 0.09523809524 | 0.09523809524 | 0             |  | inf          | #DIV/0! |
| MIR6874 | 0.04761904762 | 0.04761904762 | 0.1666666667  |  | 0.2          | #DIV/0! |
| MIR6875 | 0.04761904762 | 0.04761904762 | 0.05555555556 |  | 0.7          | #DIV/0! |
| MIR6876 | 0.04761904762 | 0.04761904762 | 0.1111111111  |  | 0.325        | #DIV/0! |
| MIR6877 | 0.04761904762 | 0.04761904762 | 0             |  | inf          | #DIV/0! |
| MIR6878 | 0.1904761905  | 0.1904761905  | 0.05555555556 |  | 3.294117647  | #DIV/0! |
| MIR6880 | 0.04761904762 | 0.04761904762 | 0.05555555556 |  | 0.7          | #DIV/0! |
| MIR6881 | 0.04761904762 | 0.04761904762 | 0.05555555556 |  | 0.7          | #DIV/0! |
| MIR6882 | 0.04761904762 | 0.04761904762 | 0.05555555556 |  | 0.7          | #DIV/0! |
| MIR6883 | 0             | 0             | 0.05555555556 |  | 0            | #DIV/0! |
| MIR6884 | 0.09523809524 | 0.09523809524 | 0             |  | inf          | #DIV/0! |

|          |               |               |               |  |              |         |
|----------|---------------|---------------|---------------|--|--------------|---------|
| MIR6885  | 0.1428571429  | 0.1428571429  | 0.05555555556 |  | 2.333333333  | #DIV/0! |
| MIR6886  | 0.1428571429  | 0.1428571429  | 0.1111111111  |  | 1.083333333  | #DIV/0! |
| MIR6887  | 0.04761904762 | 0.04761904762 | 0.05555555556 |  | 0.7          | #DIV/0! |
| MIR6888  | 0             | 0             | 0.05555555556 |  | 0            | #DIV/0! |
| MIR6889  | 0             | 0             | 0.1111111111  |  | 0            | #DIV/0! |
| MIR6890  | 0.09523809524 | 0.09523809524 | 0             |  | inf          | #DIV/0! |
| MIR6892  | 0.04761904762 | 0.04761904762 | 0.05555555556 |  | 0.7          | #DIV/0! |
| MIR6893  | 0.04761904762 | 0.04761904762 | 0.1666666667  |  | 0.2          | #DIV/0! |
| MIR7-1   | 0             | 0             | 0.05555555556 |  | 0            | #DIV/0! |
| MIR7-2   | 0.04761904762 | 0.04761904762 | 0.05555555556 |  | 0.7          | #DIV/0! |
| MIR7-3   | 0.09523809524 | 0.09523809524 | 0.05555555556 |  | 1.473684211  | #DIV/0! |
| MIR7-3H  | 0.09523809524 | 0.09523809524 | 0.05555555556 |  | 1.473684211  | #DIV/0! |
| MIR7106  | 0             | 0             | 0.05555555556 |  | 0            | #DIV/0! |
| MIR7107  | 0.04761904762 | 0.04761904762 | 0.1111111111  |  | 0.325        | #DIV/0! |
| MIR7108  | 0.09523809524 | 0.09523809524 | 0.05555555556 |  | 1.473684211  | #DIV/0! |
| MIR7109  | 0.04761904762 | 0.04761904762 | 0.1111111111  |  | 0.325        | #DIV/0! |
| MIR7110  | 0.09523809524 | 0.09523809524 | 0             |  | inf          | #DIV/0! |
| MIR7110  | 0.04761904762 | 0.04761904762 | 0.05555555556 |  | 0.7          | #DIV/0! |
| MIR7110  | 0.04761904762 | 0.04761904762 | 0.05555555556 |  | 0.7          | #DIV/0! |
| MIR7112  | 0.04761904762 | 0.04761904762 | 0.1666666667  |  | 0.2          | #DIV/0! |
| MIR7114  | 0.09523809524 | 0.09523809524 | 0             |  | inf          | #DIV/0! |
| MIR7150  | 0.09523809524 | 0.09523809524 | 0.05555555556 |  | 1.473684211  | #DIV/0! |
| MIR7151  | 0.1428571429  | 0.1428571429  | 0             |  | inf          | #DIV/0! |
| MIR7152  | 0.09523809524 | 0.09523809524 | 0             |  | inf          | #DIV/0! |
| MIR7153  | 0.09523809524 | 0.09523809524 | 0.05555555556 |  | 1.473684211  | #DIV/0! |
| MIR7156  | 0.04761904762 | 0.04761904762 | 0.05555555556 |  | 0.7          | #DIV/0! |
| MIR7157  | 0             | 0             | 0.05555555556 |  | 0            | #DIV/0! |
| MIR7158  | 0             | 0             | 0.05555555556 |  | 0            | #DIV/0! |
| MIR7159  | 0.04761904762 | 0.04761904762 | 0             |  | inf          | #DIV/0! |
| MIR7160  | 0.1428571429  | 0.1428571429  | 0.1111111111  |  | 1.083333333  | #DIV/0! |
| MIR7162  | 0.09523809524 | 0.09523809524 | 0.2222222222  |  | 0.2894736842 | #DIV/0! |
| MIR744   | 0.04761904762 | 0.04761904762 | 0.05555555556 |  | 0.7          | #DIV/0! |
| MIR7515  | 0             | 0             | 0.05555555556 |  | 0            | #DIV/0! |
| MIR7515H | 0             | 0             | 0.05555555556 |  | 0            | #DIV/0! |
| MIR760   | 0.04761904762 | 0.04761904762 | 0.05555555556 |  | 0.7          | #DIV/0! |
| MIR761   | 0.04761904762 | 0.04761904762 | 0.05555555556 |  | 0.7          | #DIV/0! |
| MIR762   | 0.04761904762 | 0.04761904762 | 0             |  | inf          | #DIV/0! |
| MIR762H  | 0.04761904762 | 0.04761904762 | 0             |  | inf          | #DIV/0! |
| MIR765   | 0.1428571429  | 0.1428571429  | 0.05555555556 |  | 2.333333333  | #DIV/0! |
| MIR7702  | 0.04761904762 | 0.04761904762 | 0.05555555556 |  | 0.7          | #DIV/0! |
| MIR7705  | 0.1904761905  | 0.1904761905  | 0.1111111111  |  | 1.529411765  | #DIV/0! |
| MIR7706  | 0.04761904762 | 0.04761904762 | 0.05555555556 |  | 0.7          | #DIV/0! |
| MIR7843  | 0.04761904762 | 0.04761904762 | 0             |  | inf          | #DIV/0! |
| MIR7844  | 0.04761904762 | 0.04761904762 | 0.05555555556 |  | 0.7          | #DIV/0! |
| MIR7845  | 0             | 0             | 0.05555555556 |  | 0            | #DIV/0! |
| MIR7846  | 0.04761904762 | 0.04761904762 | 0.1111111111  |  | 0.325        | #DIV/0! |
| MIR7847  | 0.04761904762 | 0.04761904762 | 0             |  | inf          | #DIV/0! |
| MIR7848  | 0.04761904762 | 0.04761904762 | 0.1666666667  |  | 0.2          | #DIV/0! |
| MIR7849  | 0             | 0             | 0.05555555556 |  | 0            | #DIV/0! |
| MIR7850  | 0.09523809524 | 0.09523809524 | 0.05555555556 |  | 1.473684211  | #DIV/0! |
| MIR7851  | 0.04761904762 | 0.04761904762 | 0.1111111111  |  | 0.325        | #DIV/0! |

|         |               |               |               |  |              |         |
|---------|---------------|---------------|---------------|--|--------------|---------|
| MIR7852 | 0.04761904762 | 0.04761904762 | 0.05555555556 |  | 0.7          | #DIV/0! |
| MIR7854 | 0.04761904762 | 0.04761904762 | 0             |  | inf          | #DIV/0! |
| MIR7856 | 0.04761904762 | 0.04761904762 | 0.05555555556 |  | 0.7          | #DIV/0! |
| MIR7973 | 0.04761904762 | 0.04761904762 | 0.05555555556 |  | 0.7          | #DIV/0! |
| MIR7973 | 0.04761904762 | 0.04761904762 | 0.05555555556 |  | 0.7          | #DIV/0! |
| MIR7974 | 0.1428571429  | 0.1428571429  | 0.1111111111  |  | 1.083333333  | #DIV/0! |
| MIR7975 | 0.09523809524 | 0.09523809524 | 0.05555555556 |  | 1.473684211  | #DIV/0! |
| MIR7976 | 0.09523809524 | 0.09523809524 | 0.05555555556 |  | 1.473684211  | #DIV/0! |
| MIR7977 | 0.1904761905  | 0.1904761905  | 0.05555555556 |  | 3.294117647  | #DIV/0! |
| MIR802  | 0.04761904762 | 0.04761904762 | 0.1666666667  |  | 0.2          | #DIV/0! |
| MIR8053 | 0.04761904762 | 0.04761904762 | 0.05555555556 |  | 0.7          | #DIV/0! |
| MIR8055 | 0.09523809524 | 0.09523809524 | 0.1111111111  |  | 0.6842105263 | #DIV/0! |
| MIR8056 | 0             | 0             | 0.05555555556 |  | 0            | #DIV/0! |
| MIR8057 | 0.09523809524 | 0.09523809524 | 0.05555555556 |  | 1.473684211  | #DIV/0! |
| MIR8058 | 0.04761904762 | 0.04761904762 | 0             |  | inf          | #DIV/0! |
| MIR8059 | 0.09523809524 | 0.09523809524 | 0             |  | inf          | #DIV/0! |
| MIR8060 | 0.04761904762 | 0.04761904762 | 0.05555555556 |  | 0.7          | #DIV/0! |
| MIR8061 | 0.09523809524 | 0.09523809524 | 0.05555555556 |  | 1.473684211  | #DIV/0! |
| MIR8062 | 0.1904761905  | 0.1904761905  | 0.1111111111  |  | 1.529411765  | #DIV/0! |
| MIR8063 | 0             | 0             | 0             |  |              | #DIV/0! |
| MIR8064 | 0.04761904762 | 0.04761904762 | 0             |  | inf          | #DIV/0! |
| MIR8065 | 0.04761904762 | 0.04761904762 | 0             |  | inf          | #DIV/0! |
| MIR8066 | 0             | 0             | 0.05555555556 |  | 0            | #DIV/0! |
| MIR8067 | 0.04761904762 | 0.04761904762 | 0.05555555556 |  | 0.7          | #DIV/0! |
| MIR8069 | 0.04761904762 | 0.04761904762 | 0             |  | inf          | #DIV/0! |
| MIR8069 | 0.04761904762 | 0.04761904762 | 0             |  | inf          | #DIV/0! |
| MIR8072 | 0.04761904762 | 0.04761904762 | 0.1111111111  |  | 0.325        | #DIV/0! |
| MIR8076 | 0.09523809524 | 0.09523809524 | 0.05555555556 |  | 1.473684211  | #DIV/0! |
| MIR8077 | 0.04761904762 | 0.04761904762 | 0.05555555556 |  | 0.7          | #DIV/0! |
| MIR8078 | 0.09523809524 | 0.09523809524 | 0             |  | inf          | #DIV/0! |
| MIR8080 | 0             | 0             | 0.05555555556 |  | 0            | #DIV/0! |
| MIR8081 | 0.04761904762 | 0.04761904762 | 0.05555555556 |  | 0.7          | #DIV/0! |
| MIR8082 | 0             | 0             | 0.05555555556 |  | 0            | #DIV/0! |
| MIR8083 | 0.1904761905  | 0.1904761905  | 0.05555555556 |  | 3.294117647  | #DIV/0! |
| MIR8084 | 0.1904761905  | 0.1904761905  | 0.1111111111  |  | 1.529411765  | #DIV/0! |
| MIR8085 | 0.09523809524 | 0.09523809524 | 0.1111111111  |  | 0.6842105263 | #DIV/0! |
| MIR8086 | 0.09523809524 | 0.09523809524 | 0.1111111111  |  | 0.6842105263 | #DIV/0! |
| MIR8089 | 0.09523809524 | 0.09523809524 | 0.05555555556 |  | 1.473684211  | #DIV/0! |
| MIR8485 | 0             | 0             | 0.05555555556 |  | 0            | #DIV/0! |
| MIR873  | 0.09523809524 | 0.09523809524 | 0.05555555556 |  | 1.473684211  | #DIV/0! |
| MIR874  | 0             | 0             | 0             |  |              | #DIV/0! |
| MIR875  | 0.1904761905  | 0.1904761905  | 0.1111111111  |  | 1.529411765  | #DIV/0! |
| MIR876  | 0.09523809524 | 0.09523809524 | 0.05555555556 |  | 1.473684211  | #DIV/0! |
| MIR885  | 0.04761904762 | 0.04761904762 | 0             |  | inf          | #DIV/0! |
| MIR887  | 0.04761904762 | 0.04761904762 | 0.05555555556 |  | 0.7          | #DIV/0! |
| MIR9-1  | 0.1428571429  | 0.1428571429  | 0.1111111111  |  | 1.083333333  | #DIV/0! |
| MIR9-2  | 0.04761904762 | 0.04761904762 | 0             |  | inf          | #DIV/0! |
| MIR9-3  | 0.04761904762 | 0.04761904762 | 0.05555555556 |  | 0.7          | #DIV/0! |
| MIR9-3H | 0.04761904762 | 0.04761904762 | 0.05555555556 |  | 0.7          | #DIV/0! |
| MIR920  | 0.04761904762 | 0.04761904762 | 0.05555555556 |  | 0.7          | #DIV/0! |
| MIR921  | 0.1428571429  | 0.1428571429  | 0             |  | inf          | #DIV/0! |

|         |               |               |               |  |              |         |
|---------|---------------|---------------|---------------|--|--------------|---------|
| MIR922  | 0.1428571429  | 0.1428571429  | 0.05555555556 |  | 2.333333333  | #DIV/0! |
| MIR924  | 0.09523809524 | 0.09523809524 | 0             |  | inf          | #DIV/0! |
| IR924H  | 0.09523809524 | 0.09523809524 | 0             |  | inf          | #DIV/0! |
| MIR92B  | 0.1904761905  | 0.1904761905  | 0.1111111111  |  | 1.529411765  | #DIV/0! |
| MIR93   | 0.04761904762 | 0.04761904762 | 0.05555555556 |  | 0.7          | #DIV/0! |
| MIR933  | 0             | 0             | 0.1111111111  |  | 0            | #DIV/0! |
| MIR935  | 0.09523809524 | 0.09523809524 | 0.05555555556 |  | 1.473684211  | #DIV/0! |
| MIR936  | 0.1428571429  | 0.1428571429  | 0.1111111111  |  | 1.083333333  | #DIV/0! |
| MIR937  | 0.04761904762 | 0.04761904762 | 0.1666666667  |  | 0.2          | #DIV/0! |
| MIR938  | 0.09523809524 | 0.09523809524 | 0.2222222222  |  | 0.2894736842 | #DIV/0! |
| MIR939  | 0.04761904762 | 0.04761904762 | 0.1666666667  |  | 0.2          | #DIV/0! |
| MIR940  | 0.09523809524 | 0.09523809524 | 0.2222222222  |  | 0.2894736842 | #DIV/0! |
| IIR941- | 0.1428571429  | 0.1428571429  | 0.2222222222  |  | 0.4583333333 | #DIV/0! |
| IIR941- | 0.1428571429  | 0.1428571429  | 0.2222222222  |  | 0.4583333333 | #DIV/0! |
| IIR941- | 0.1428571429  | 0.1428571429  | 0.2222222222  |  | 0.4583333333 | #DIV/0! |
| IIR941- | 0.1428571429  | 0.1428571429  | 0.2222222222  |  | 0.4583333333 | #DIV/0! |
| IIR941- | 0.1428571429  | 0.1428571429  | 0.2222222222  |  | 0.4583333333 | #DIV/0! |
| MIR942  | 0.04761904762 | 0.04761904762 | 0.05555555556 |  | 0.7          | #DIV/0! |
| MIR943  | 0.04761904762 | 0.04761904762 | 0             |  | inf          | #DIV/0! |
| MIR944  | 0.09523809524 | 0.09523809524 | 0.1111111111  |  | 0.6842105263 | #DIV/0! |
| MIR950  | 0             | 0             | 0.05555555556 |  | 0            | #DIV/0! |
| MIR96   | 0.04761904762 | 0.04761904762 | 0.05555555556 |  | 0.7          | #DIV/0! |
| MIR99A  | 0.04761904762 | 0.04761904762 | 0.1111111111  |  | 0.325        | #DIV/0! |
| IR99AH  | 0.04761904762 | 0.04761904762 | 0.1111111111  |  | 0.325        | #DIV/0! |
| IRLET7  | 0.04761904762 | 0.04761904762 | 0.05555555556 |  | 0.7          | #DIV/0! |
| IRLET7  | 0             | 0             | 0.1111111111  |  | 0            | #DIV/0! |
| IRLET7  | 0             | 0             | 0.1111111111  |  | 0            | #DIV/0! |
| RLET7B  | 0             | 0             | 0.1111111111  |  | 0            | #DIV/0! |
| IRLET7  | 0.04761904762 | 0.04761904762 | 0.1111111111  |  | 0.325        | #DIV/0! |
| IRLET7  | 0.04761904762 | 0.04761904762 | 0.05555555556 |  | 0.7          | #DIV/0! |
| IRLET7  | 0.04761904762 | 0.04761904762 | 0.05555555556 |  | 0.7          | #DIV/0! |
| IIRLET7 | 0.09523809524 | 0.09523809524 | 0             |  | inf          | #DIV/0! |
| MIS12   | 0             | 0             | 0.05555555556 |  | 0            | #DIV/0! |
| MIS18A  | 0.04761904762 | 0.04761904762 | 0.1111111111  |  | 0.325        | #DIV/0! |
| IIS18BP | 0.04761904762 | 0.04761904762 | 0             |  | inf          | #DIV/0! |
| MISP    | 0.09523809524 | 0.09523809524 | 0.1111111111  |  | 0.6842105263 | #DIV/0! |
| MISP3   | 0.1428571429  | 0.1428571429  | 0.1111111111  |  | 1.083333333  | #DIV/0! |
| MITD1   | 0             | 0             | 0.05555555556 |  | 0            | #DIV/0! |
| MITF    | 0.04761904762 | 0.04761904762 | 0             |  | inf          | #DIV/0! |
| MIXL1   | 0.1428571429  | 0.1428571429  | 0             |  | inf          | #DIV/0! |
| MKI67   | 0.2380952381  | 0.2380952381  | 0.05555555556 |  | 4.375        | #DIV/0! |
| MKKS    | 0.1904761905  | 0.1904761905  | 0.1111111111  |  | 1.529411765  | #DIV/0! |
| MKLN1   | 0.04761904762 | 0.04761904762 | 0.05555555556 |  | 0.7          | #DIV/0! |
| KLN1-A  | 0.04761904762 | 0.04761904762 | 0.05555555556 |  | 0.7          | #DIV/0! |
| MKNK1   | 0.04761904762 | 0.04761904762 | 0.05555555556 |  | 0.7          | #DIV/0! |
| KNK1-A  | 0.04761904762 | 0.04761904762 | 0.05555555556 |  | 0.7          | #DIV/0! |
| MKNK2   | 0.09523809524 | 0.09523809524 | 0.1111111111  |  | 0.6842105263 | #DIV/0! |
| MKRN1   | 0.04761904762 | 0.04761904762 | 0.05555555556 |  | 0.7          | #DIV/0! |
| MKRN2   | 0.09523809524 | 0.09523809524 | 0             |  | inf          | #DIV/0! |
| IKRN2O  | 0.09523809524 | 0.09523809524 | 0             |  | inf          | #DIV/0! |
| IKRN7I  | 0.1428571429  | 0.1428571429  | 0.1666666667  |  | 0.6666666667 | #DIV/0! |

|                |               |               |               |  |              |         |
|----------------|---------------|---------------|---------------|--|--------------|---------|
| <b>IKRN9I</b>  | 0.04761904762 | 0.04761904762 | 0.05555555556 |  | 0.7          | #DIV/0! |
| <b>MKS1</b>    | 0.09523809524 | 0.09523809524 | 0             |  | inf          | #DIV/0! |
| <b>MKX</b>     | 0.09523809524 | 0.09523809524 | 0.1111111111  |  | 0.6842105263 | #DIV/0! |
| <b>IKX-AS</b>  | 0.09523809524 | 0.09523809524 | 0.1111111111  |  | 0.6842105263 | #DIV/0! |
| <b>MLANA</b>   | 0.04761904762 | 0.04761904762 | 0.05555555556 |  | 0.7          | #DIV/0! |
| <b>MLC1</b>    | 0             | 0             | 0.1111111111  |  | 0            | #DIV/0! |
| <b>MLEC</b>    | 0             | 0             | 0.1111111111  |  | 0            | #DIV/0! |
| <b>MLF1</b>    | 0.1428571429  | 0.1428571429  | 0.05555555556 |  | 2.333333333  | #DIV/0! |
| <b>MLF2</b>    | 0.04761904762 | 0.04761904762 | 0.1111111111  |  | 0.325        | #DIV/0! |
| <b>MLH1</b>    | 0.04761904762 | 0.04761904762 | 0             |  | inf          | #DIV/0! |
| <b>MLIP</b>    | 0.04761904762 | 0.04761904762 | 0             |  | inf          | #DIV/0! |
| <b>ILIP-AS</b> | 0.04761904762 | 0.04761904762 | 0             |  | inf          | #DIV/0! |
| <b>ILIP-IT</b> | 0.04761904762 | 0.04761904762 | 0             |  | inf          | #DIV/0! |
| <b>MLKL</b>    | 0.04761904762 | 0.04761904762 | 0             |  | inf          | #DIV/0! |
| <b>MLLT1</b>   | 0.1428571429  | 0.1428571429  | 0.05555555556 |  | 2.333333333  | #DIV/0! |
| <b>MLLT10</b>  | 0.09523809524 | 0.09523809524 | 0.1111111111  |  | 0.6842105263 | #DIV/0! |
| <b>LLT10I</b>  | 0.09523809524 | 0.09523809524 | 0.05555555556 |  | 1.473684211  | #DIV/0! |
| <b>MLLT11</b>  | 0.1904761905  | 0.1904761905  | 0.05555555556 |  | 3.294117647  | #DIV/0! |
| <b>MLLT30</b>  | 0.04761904762 | 0.04761904762 | 0.05555555556 |  | 0.7          | #DIV/0! |
| <b>MLLT60</b>  | 0.04761904762 | 0.04761904762 | 0             |  | inf          | #DIV/0! |
| <b>MLN</b>     | 0.04761904762 | 0.04761904762 | 0             |  | inf          | #DIV/0! |
| <b>MLPH</b>    | 0             | 0             | 0.05555555556 |  | 0            | #DIV/0! |
| <b>MLST8</b>   | 0.09523809524 | 0.09523809524 | 0.2222222222  |  | 0.2894736842 | #DIV/0! |
| <b>MLX</b>     | 0.04761904762 | 0.04761904762 | 0             |  | inf          | #DIV/0! |
| <b>MLXIP</b>   | 0.04761904762 | 0.04761904762 | 0.1111111111  |  | 0.325        | #DIV/0! |
| <b>MLXIPL</b>  | 0.1428571429  | 0.1428571429  | 0.1111111111  |  | 1.083333333  | #DIV/0! |
| <b>MLYCD0</b>  | 0.04761904762 | 0.04761904762 | 0             |  | inf          | #DIV/0! |
| <b>MMAA</b>    | 0             | 0             | 0.05555555556 |  | 0            | #DIV/0! |
| <b>MMAB</b>    | 0             | 0             | 0.05555555556 |  | 0            | #DIV/0! |
| <b>IMACH0</b>  | 0.04761904762 | 0.04761904762 | 0.05555555556 |  | 0.7          | #DIV/0! |
| <b>IMADH0</b>  | 0             | 0             | 0.05555555556 |  | 0            | #DIV/0! |
| <b>MMD</b>     | 0.09523809524 | 0.09523809524 | 0             |  | inf          | #DIV/0! |
| <b>MMD2</b>    | 0.04761904762 | 0.04761904762 | 0.1666666667  |  | 0.2          | #DIV/0! |
| <b>MME</b>     | 0.1904761905  | 0.1904761905  | 0.05555555556 |  | 3.294117647  | #DIV/0! |
| <b>MMEL1</b>   | 0             | 0             | 0.1111111111  |  | 0            | #DIV/0! |
| <b>MMP11</b>   | 0.04761904762 | 0.04761904762 | 0.1111111111  |  | 0.325        | #DIV/0! |
| <b>MMP14</b>   | 0             | 0             | 0.05555555556 |  | 0            | #DIV/0! |
| <b>MMP15</b>   | 0.04761904762 | 0.04761904762 | 0             |  | inf          | #DIV/0! |
| <b>MMP16</b>   | 0.1904761905  | 0.1904761905  | 0.1666666667  |  | 0.9411764706 | #DIV/0! |
| <b>MMP17</b>   | 0.09523809524 | 0.09523809524 | 0.05555555556 |  | 1.473684211  | #DIV/0! |
| <b>MMP19</b>   | 0.04761904762 | 0.04761904762 | 0.05555555556 |  | 0.7          | #DIV/0! |
| <b>MMP2</b>    | 0.04761904762 | 0.04761904762 | 0             |  | inf          | #DIV/0! |
| <b>MP2-AS</b>  | 0.04761904762 | 0.04761904762 | 0             |  | inf          | #DIV/0! |
| <b>MMP21</b>   | 0.2380952381  | 0.2380952381  | 0.05555555556 |  | 4.375        | #DIV/0! |
| <b>MMP23A</b>  | 0             | 0             | 0.1111111111  |  | 0            | #DIV/0! |
| <b>MMP23E</b>  | 0             | 0             | 0.1111111111  |  | 0            | #DIV/0! |
| <b>MMP24</b>   | 0.09523809524 | 0.09523809524 | 0.1111111111  |  | 0.6842105263 | #DIV/0! |
| <b>4-AS1-E</b> | 0.09523809524 | 0.09523809524 | 0.1111111111  |  | 0.6842105263 | #DIV/0! |
| <b>IMP240</b>  | 0.09523809524 | 0.09523809524 | 0.1111111111  |  | 0.6842105263 | #DIV/0! |
| <b>MMP25</b>   | 0.04761904762 | 0.04761904762 | 0.1111111111  |  | 0.325        | #DIV/0! |
| <b>MP25-A0</b> | 0.04761904762 | 0.04761904762 | 0.1111111111  |  | 0.325        | #DIV/0! |

|        |               |               |              |  |              |         |
|--------|---------------|---------------|--------------|--|--------------|---------|
| MMP26  | 0.04761904762 | 0.04761904762 | 0            |  | inf          | #DIV/0! |
| MMP28  | 0.09523809524 | 0.09523809524 | 0            |  | inf          | #DIV/0! |
| MMP9   | 0.1428571429  | 0.1428571429  | 0.1666666667 |  | 0.6666666667 | #DIV/0! |
| MMRN1  | 0             | 0             | 0.0555555556 |  | 0            | #DIV/0! |
| MMRN2  | 0.1428571429  | 0.1428571429  | 0.0555555556 |  | 2.333333333  | #DIV/0! |
| MMS19  | 0.1428571429  | 0.1428571429  | 0            |  | inf          | #DIV/0! |
| MN1    | 0.04761904762 | 0.04761904762 | 0.1111111111 |  | 0.325        | #DIV/0! |
| MND1   | 0             | 0             | 0.0555555556 |  | 0            | #DIV/0! |
| MNDA   | 0.1428571429  | 0.1428571429  | 0            |  | inf          | #DIV/0! |
| MNS1   | 0.04761904762 | 0.04761904762 | 0.0555555556 |  | 0.7          | #DIV/0! |
| MNT    | 0             | 0             | 0.1111111111 |  | 0            | #DIV/0! |
| MNX1   | 0.1428571429  | 0.1428571429  | 0.0555555556 |  | 2.333333333  | #DIV/0! |
| NX1-AS | 0.1428571429  | 0.1428571429  | 0.0555555556 |  | 2.333333333  | #DIV/0! |
| NX1-AS | 0.1428571429  | 0.1428571429  | 0.0555555556 |  | 2.333333333  | #DIV/0! |
| MOB1A  | 0             | 0             | 0.0555555556 |  | 0            | #DIV/0! |
| MOB1B  | 0.09523809524 | 0.09523809524 | 0.0555555556 |  | 1.473684211  | #DIV/0! |
| MOB2   | 0.04761904762 | 0.04761904762 | 0            |  | inf          | #DIV/0! |
| MOB3A  | 0.09523809524 | 0.09523809524 | 0.1111111111 |  | 0.6842105263 | #DIV/0! |
| MOB3B  | 0.04761904762 | 0.04761904762 | 0.0555555556 |  | 0.7          | #DIV/0! |
| MOB3C  | 0.04761904762 | 0.04761904762 | 0.0555555556 |  | 0.7          | #DIV/0! |
| MOB4   | 0             | 0             | 0.0555555556 |  | 0            | #DIV/0! |
| MOBP   | 0.04761904762 | 0.04761904762 | 0            |  | inf          | #DIV/0! |
| MOCOS  | 0.04761904762 | 0.04761904762 | 0            |  | inf          | #DIV/0! |
| MOCS1  | 0             | 0             | 0.0555555556 |  | 0            | #DIV/0! |
| MOCS2  | 0.04761904762 | 0.04761904762 | 0.0555555556 |  | 0.7          | #DIV/0! |
| MOCS3  | 0.09523809524 | 0.09523809524 | 0.1666666667 |  | 0.4210526316 | #DIV/0! |
| IOGAT  | 0             | 0             | 0.0555555556 |  | 0            | #DIV/0! |
| IOGAT  | 0.04761904762 | 0.04761904762 | 0.0555555556 |  | 0.7          | #DIV/0! |
| MOGS   | 0             | 0             | 0.0555555556 |  | 0            | #DIV/0! |
| MON1A  | 0.09523809524 | 0.09523809524 | 0            |  | inf          | #DIV/0! |
| MON1B  | 0.04761904762 | 0.04761904762 | 0            |  | inf          | #DIV/0! |
| MON2   | 0.09523809524 | 0.09523809524 | 0            |  | inf          | #DIV/0! |
| MORC1  | 0.09523809524 | 0.09523809524 | 0.0555555556 |  | 1.473684211  | #DIV/0! |
| ORC1-A | 0.09523809524 | 0.09523809524 | 0.0555555556 |  | 1.473684211  | #DIV/0! |
| MORC2  | 0.04761904762 | 0.04761904762 | 0.1111111111 |  | 0.325        | #DIV/0! |
| ORC2-A | 0.04761904762 | 0.04761904762 | 0.1111111111 |  | 0.325        | #DIV/0! |
| MORC3  | 0.04761904762 | 0.04761904762 | 0.1666666667 |  | 0.2          | #DIV/0! |
| IORF4L | 0.04761904762 | 0.04761904762 | 0.0555555556 |  | 0.7          | #DIV/0! |
| MORN1  | 0             | 0             | 0.1111111111 |  | 0            | #DIV/0! |
| MORN2  | 0             | 0             | 0.0555555556 |  | 0            | #DIV/0! |
| MORN3  | 0.04761904762 | 0.04761904762 | 0.1111111111 |  | 0.325        | #DIV/0! |
| MORN4  | 0.1428571429  | 0.1428571429  | 0            |  | inf          | #DIV/0! |
| MORN5  | 0.09523809524 | 0.09523809524 | 0.0555555556 |  | 1.473684211  | #DIV/0! |
| MOS    | 0.1428571429  | 0.1428571429  | 0.1111111111 |  | 1.083333333  | #DIV/0! |
| MOSMO  | 0.04761904762 | 0.04761904762 | 0            |  | inf          | #DIV/0! |
| MOSPD3 | 0.04761904762 | 0.04761904762 | 0.0555555556 |  | 0.7          | #DIV/0! |
| MOV10  | 0.04761904762 | 0.04761904762 | 0.0555555556 |  | 0.7          | #DIV/0! |
| IOV10L | 0             | 0             | 0.1111111111 |  | 0            | #DIV/0! |
| IOXD2I | 0.04761904762 | 0.04761904762 | 0.0555555556 |  | 0.7          | #DIV/0! |
| MPC2   | 0.1428571429  | 0.1428571429  | 0            |  | inf          | #DIV/0! |
| MPDU1  | 0             | 0             | 0.0555555556 |  | 0            | #DIV/0! |

|               |               |               |               |  |              |         |
|---------------|---------------|---------------|---------------|--|--------------|---------|
| <b>MPDZ</b>   | 0.09523809524 | 0.09523809524 | 0.05555555556 |  | 1.473684211  | #DIV/0! |
| <b>MPG</b>    | 0.04761904762 | 0.04761904762 | 0.2222222222  |  | 0.1375       | #DIV/0! |
| <b>PHOSPH</b> | 0             | 0             | 0.05555555556 |  | 0            | #DIV/0! |
| <b>PHOSPI</b> | 0.04761904762 | 0.04761904762 | 0             |  | inf          | #DIV/0! |
| <b>PHOSPI</b> | 0.04761904762 | 0.04761904762 | 0             |  | inf          | #DIV/0! |
| <b>PHOSPI</b> | 0.04761904762 | 0.04761904762 | 0.1111111111  |  | 0.325        | #DIV/0! |
| <b>MPI</b>    | 0.04761904762 | 0.04761904762 | 0.05555555556 |  | 0.7          | #DIV/0! |
| <b>MPIG6B</b> | 0.04761904762 | 0.04761904762 | 0             |  | inf          | #DIV/0! |
| <b>MPL</b>    | 0.04761904762 | 0.04761904762 | 0.05555555556 |  | 0.7          | #DIV/0! |
| <b>MPLKIP</b> | 0.04761904762 | 0.04761904762 | 0.2222222222  |  | 0.1375       | #DIV/0! |
| <b>MPND</b>   | 0.09523809524 | 0.09523809524 | 0.05555555556 |  | 1.473684211  | #DIV/0! |
| <b>MPO</b>    | 0.09523809524 | 0.09523809524 | 0             |  | inf          | #DIV/0! |
| <b>MPP2</b>   | 0.09523809524 | 0.09523809524 | 0             |  | inf          | #DIV/0! |
| <b>MPP3</b>   | 0.09523809524 | 0.09523809524 | 0             |  | inf          | #DIV/0! |
| <b>MPP4</b>   | 0             | 0             | 0.05555555556 |  | 0            | #DIV/0! |
| <b>MPP6</b>   | 0.04761904762 | 0.04761904762 | 0.2222222222  |  | 0.1375       | #DIV/0! |
| <b>MPP7</b>   | 0.09523809524 | 0.09523809524 | 0.1111111111  |  | 0.6842105263 | #DIV/0! |
| <b>MPPE1</b>  | 0.09523809524 | 0.09523809524 | 0.05555555556 |  | 1.473684211  | #DIV/0! |
| <b>MPPEDI</b> | 0             | 0             | 0.1666666667  |  | 0            | #DIV/0! |
| <b>MPRIP</b>  | 0.04761904762 | 0.04761904762 | 0.1111111111  |  | 0.325        | #DIV/0! |
| <b>MPST</b>   | 0             | 0             | 0.1111111111  |  | 0            | #DIV/0! |
| <b>MPV17L</b> | 0.04761904762 | 0.04761904762 | 0             |  | inf          | #DIV/0! |
| <b>IPV17L</b> | 0.1428571429  | 0.1428571429  | 0.1111111111  |  | 1.083333333  | #DIV/0! |
| <b>MPZ</b>    | 0.1428571429  | 0.1428571429  | 0             |  | inf          | #DIV/0! |
| <b>MPZL1</b>  | 0.1428571429  | 0.1428571429  | 0             |  | inf          | #DIV/0! |
| <b>MR1</b>    | 0.1428571429  | 0.1428571429  | 0             |  | inf          | #DIV/0! |
| <b>MRAP</b>   | 0.04761904762 | 0.04761904762 | 0.1111111111  |  | 0.325        | #DIV/0! |
| <b>MRAS</b>   | 0.1428571429  | 0.1428571429  | 0.05555555556 |  | 2.333333333  | #DIV/0! |
| <b>MRC1</b>   | 0.09523809524 | 0.09523809524 | 0.1111111111  |  | 0.6842105263 | #DIV/0! |
| <b>MRC2</b>   | 0.04761904762 | 0.04761904762 | 0             |  | inf          | #DIV/0! |
| <b>MREG</b>   | 0             | 0             | 0.05555555556 |  | 0            | #DIV/0! |
| <b>MRGBP</b>  | 0.1428571429  | 0.1428571429  | 0.2222222222  |  | 0.4583333333 | #DIV/0! |
| <b>IRGPR1</b> | 0.04761904762 | 0.04761904762 | 0             |  | inf          | #DIV/0! |
| <b>IRGPR0</b> | 0.04761904762 | 0.04761904762 | 0             |  | inf          | #DIV/0! |
| <b>GPRG-A</b> | 0.04761904762 | 0.04761904762 | 0             |  | inf          | #DIV/0! |
| <b>MR11</b>   | 0.1428571429  | 0.1428571429  | 0.1111111111  |  | 1.083333333  | #DIV/0! |
| <b>MRLN</b>   | 0.04761904762 | 0.04761904762 | 0.05555555556 |  | 0.7          | #DIV/0! |
| <b>MRM1</b>   | 0.04761904762 | 0.04761904762 | 0             |  | inf          | #DIV/0! |
| <b>MRM2</b>   | 0.04761904762 | 0.04761904762 | 0.1666666667  |  | 0.2          | #DIV/0! |
| <b>MRNIP</b>  | 0.09523809524 | 0.09523809524 | 0.05555555556 |  | 1.473684211  | #DIV/0! |
| <b>MRO</b>    | 0.04761904762 | 0.04761904762 | 0             |  | inf          | #DIV/0! |
| <b>MROH1</b>  | 0.04761904762 | 0.04761904762 | 0.1666666667  |  | 0.2          | #DIV/0! |
| <b>IROH2A</b> | 0             | 0             | 0.05555555556 |  | 0            | #DIV/0! |
| <b>IROH2I</b> | 0.04761904762 | 0.04761904762 | 0.05555555556 |  | 0.7          | #DIV/0! |
| <b>IROH3I</b> | 0.1428571429  | 0.1428571429  | 0             |  | inf          | #DIV/0! |
| <b>MROH5</b>  | 0.04761904762 | 0.04761904762 | 0.2222222222  |  | 0.1375       | #DIV/0! |
| <b>MROH6</b>  | 0.04761904762 | 0.04761904762 | 0.1666666667  |  | 0.2          | #DIV/0! |
| <b>MROH7</b>  | 0.04761904762 | 0.04761904762 | 0.05555555556 |  | 0.7          | #DIV/0! |
| <b>OH7-TT</b> | 0.04761904762 | 0.04761904762 | 0.05555555556 |  | 0.7          | #DIV/0! |
| <b>MROH8</b>  | 0.09523809524 | 0.09523809524 | 0.1111111111  |  | 0.6842105263 | #DIV/0! |
| <b>MROH9</b>  | 0.1428571429  | 0.1428571429  | 0.05555555556 |  | 2.333333333  | #DIV/0! |

|         |               |               |               |  |              |         |
|---------|---------------|---------------|---------------|--|--------------|---------|
| MRPL1   | 0.04761904762 | 0.04761904762 | 0.05555555556 |  | 0.7          | #DIV/0! |
| MRPL10  | 0.1428571429  | 0.1428571429  | 0             |  | inf          | #DIV/0! |
| MRPL12  | 0.04761904762 | 0.04761904762 | 0             |  | inf          | #DIV/0! |
| MRPL13  | 0.09523809524 | 0.09523809524 | 0.1111111111  |  | 0.6842105263 | #DIV/0! |
| MRPL14  | 0.04761904762 | 0.04761904762 | 0.05555555556 |  | 0.7          | #DIV/0! |
| MRPL15  | 0.1428571429  | 0.1428571429  | 0.1111111111  |  | 1.083333333  | #DIV/0! |
| MRPL17  | 0.04761904762 | 0.04761904762 | 0             |  | inf          | #DIV/0! |
| MRPL19  | 0             | 0             | 0.05555555556 |  | 0            | #DIV/0! |
| MRPL2   | 0.04761904762 | 0.04761904762 | 0.05555555556 |  | 0.7          | #DIV/0! |
| MRPL20  | 0             | 0             | 0.1111111111  |  | 0            | #DIV/0! |
| RPL20-A | 0             | 0             | 0.1111111111  |  | 0            | #DIV/0! |
| MRPL22  | 0             | 0             | 0.05555555556 |  | 0            | #DIV/0! |
| MRPL23  | 0.04761904762 | 0.04761904762 | 0             |  | inf          | #DIV/0! |
| RPL23-A | 0.04761904762 | 0.04761904762 | 0             |  | inf          | #DIV/0! |
| MRPL24  | 0.1428571429  | 0.1428571429  | 0.1111111111  |  | 1.083333333  | #DIV/0! |
| MRPL27  | 0.09523809524 | 0.09523809524 | 0             |  | inf          | #DIV/0! |
| MRPL28  | 0.04761904762 | 0.04761904762 | 0.2222222222  |  | 0.1375       | #DIV/0! |
| MRPL3   | 0.09523809524 | 0.09523809524 | 0.05555555556 |  | 1.473684211  | #DIV/0! |
| MRPL30  | 0             | 0             | 0.05555555556 |  | 0            | #DIV/0! |
| MRPL32  | 0.04761904762 | 0.04761904762 | 0.2222222222  |  | 0.1375       | #DIV/0! |
| MRPL33  | 0             | 0             | 0.1111111111  |  | 0            | #DIV/0! |
| MRPL34  | 0.1428571429  | 0.1428571429  | 0.1111111111  |  | 1.083333333  | #DIV/0! |
| MRPL35  | 0             | 0             | 0.05555555556 |  | 0            | #DIV/0! |
| MRPL36  | 0             | 0             | 0.1111111111  |  | 0            | #DIV/0! |
| MRPL37  | 0.04761904762 | 0.04761904762 | 0.05555555556 |  | 0.7          | #DIV/0! |
| MRPL38  | 0.04761904762 | 0.04761904762 | 0             |  | inf          | #DIV/0! |
| MRPL39  | 0.04761904762 | 0.04761904762 | 0.1111111111  |  | 0.325        | #DIV/0! |
| MRPL40  | 0.04761904762 | 0.04761904762 | 0.05555555556 |  | 0.7          | #DIV/0! |
| MRPL41  | 0.09523809524 | 0.09523809524 | 0             |  | inf          | #DIV/0! |
| MRPL42  | 0.04761904762 | 0.04761904762 | 0.05555555556 |  | 0.7          | #DIV/0! |
| MRPL43  | 0.1428571429  | 0.1428571429  | 0             |  | inf          | #DIV/0! |
| MRPL44  | 0             | 0             | 0.05555555556 |  | 0            | #DIV/0! |
| RPL45   | 0.1428571429  | 0.1428571429  | 0             |  | inf          | #DIV/0! |
| MRPL46  | 0.04761904762 | 0.04761904762 | 0.05555555556 |  | 0.7          | #DIV/0! |
| MRPL47  | 0.1904761905  | 0.1904761905  | 0.05555555556 |  | 3.294117647  | #DIV/0! |
| MRPL50  | 0.04761904762 | 0.04761904762 | 0             |  | inf          | #DIV/0! |
| MRPL51  | 0.04761904762 | 0.04761904762 | 0.1111111111  |  | 0.325        | #DIV/0! |
| MRPL52  | 0             | 0             | 0.05555555556 |  | 0            | #DIV/0! |
| MRPL53  | 0             | 0             | 0.05555555556 |  | 0            | #DIV/0! |
| MRPL54  | 0.09523809524 | 0.09523809524 | 0.05555555556 |  | 1.473684211  | #DIV/0! |
| MRPL55  | 0.1428571429  | 0.1428571429  | 0             |  | inf          | #DIV/0! |
| MRPL57  | 0.04761904762 | 0.04761904762 | 0             |  | inf          | #DIV/0! |
| MRPL58  | 0.04761904762 | 0.04761904762 | 0             |  | inf          | #DIV/0! |
| MRPL9   | 0.1904761905  | 0.1904761905  | 0             |  | inf          | #DIV/0! |
| MRPS10  | 0.04761904762 | 0.04761904762 | 0.05555555556 |  | 0.7          | #DIV/0! |
| MRPS11  | 0.04761904762 | 0.04761904762 | 0.05555555556 |  | 0.7          | #DIV/0! |
| MRPS12  | 0.04761904762 | 0.04761904762 | 0.05555555556 |  | 0.7          | #DIV/0! |
| MRPS14  | 0.1428571429  | 0.1428571429  | 0             |  | inf          | #DIV/0! |
| MRPS15  | 0.04761904762 | 0.04761904762 | 0.05555555556 |  | 0.7          | #DIV/0! |
| MRPS16  | 0.1904761905  | 0.1904761905  | 0.05555555556 |  | 3.294117647  | #DIV/0! |
| MRPS17  | 0.3333333333  | 0.3333333333  | 0.2222222222  |  | 1.375        | #DIV/0! |



|         |               |               |               |  |              |         |
|---------|---------------|---------------|---------------|--|--------------|---------|
| IRPS18  | 0.04761904762 | 0.04761904762 | 0.05555555556 |  | 0.7          | #DIV/0! |
| IRPS180 | 0             | 0             | 0.05555555556 |  | 0            | #DIV/0! |
| MRPS2   | 0.04761904762 | 0.04761904762 | 0             |  | inf          | #DIV/0! |
| MRPS21  | 0.1904761905  | 0.1904761905  | 0.05555555556 |  | 3.294117647  | #DIV/0! |
| MRPS22  | 0.1428571429  | 0.1428571429  | 0.05555555556 |  | 2.333333333  | #DIV/0! |
| MRPS23  | 0.09523809524 | 0.09523809524 | 0             |  | inf          | #DIV/0! |
| MRPS24  | 0.04761904762 | 0.04761904762 | 0.1666666667  |  | 0.2          | #DIV/0! |
| MRPS25  | 0.04761904762 | 0.04761904762 | 0             |  | inf          | #DIV/0! |
| MRPS26  | 0.1904761905  | 0.1904761905  | 0.05555555556 |  | 3.294117647  | #DIV/0! |
| MRPS27  | 0             | 0             | 0.05555555556 |  | 0            | #DIV/0! |
| MRPS28  | 0.1428571429  | 0.1428571429  | 0.1111111111  |  | 1.083333333  | #DIV/0! |
| MRPS30  | 0.04761904762 | 0.04761904762 | 0.05555555556 |  | 0.7          | #DIV/0! |
| RPS30-1 | 0.04761904762 | 0.04761904762 | 0.05555555556 |  | 0.7          | #DIV/0! |
| MRPS33  | 0.04761904762 | 0.04761904762 | 0.1111111111  |  | 0.325        | #DIV/0! |
| MRPS34  | 0.09523809524 | 0.09523809524 | 0.2222222222  |  | 0.2894736842 | #DIV/0! |
| MRPS35  | 0.04761904762 | 0.04761904762 | 0.05555555556 |  | 0.7          | #DIV/0! |
| MRPS36  | 0.04761904762 | 0.04761904762 | 0.05555555556 |  | 0.7          | #DIV/0! |
| MRPS5   | 0             | 0             | 0.1111111111  |  | 0            | #DIV/0! |
| MRPS6   | 0.04761904762 | 0.04761904762 | 0.1111111111  |  | 0.325        | #DIV/0! |
| MRPS7   | 0.04761904762 | 0.04761904762 | 0.05555555556 |  | 0.7          | #DIV/0! |
| MRPS9   | 0             | 0             | 0.05555555556 |  | 0            | #DIV/0! |
| MRRF    | 0.09523809524 | 0.09523809524 | 0.05555555556 |  | 1.473684211  | #DIV/0! |
| MRS2    | 0             | 0             | 0.05555555556 |  | 0            | #DIV/0! |
| MRS2P2  | 0.04761904762 | 0.04761904762 | 0.1111111111  |  | 0.325        | #DIV/0! |
| MRTFA   | 0             | 0             | 0.1111111111  |  | 0            | #DIV/0! |
| RTFA-A  | 0             | 0             | 0.1111111111  |  | 0            | #DIV/0! |
| MRTFB   | 0.04761904762 | 0.04761904762 | 0             |  | inf          | #DIV/0! |
| MRTO4   | 0.04761904762 | 0.04761904762 | 0.1111111111  |  | 0.325        | #DIV/0! |
| ISANTD  | 0.04761904762 | 0.04761904762 | 0             |  | inf          | #DIV/0! |
| ISANTD  | 0.04761904762 | 0.04761904762 | 0             |  | inf          | #DIV/0! |
| TD3-TM  | 0.04761904762 | 0.04761904762 | 0             |  | inf          | #DIV/0! |
| MSC     | 0.1904761905  | 0.1904761905  | 0.1666666667  |  | 0.9411764706 | #DIV/0! |
| ISC-AS  | 0.1904761905  | 0.1904761905  | 0.1666666667  |  | 0.9411764706 | #DIV/0! |
| MSGN1   | 0             | 0             | 0.05555555556 |  | 0            | #DIV/0! |
| MSH2    | 0             | 0             | 0.05555555556 |  | 0            | #DIV/0! |
| MSH3    | 0.04761904762 | 0.04761904762 | 0             |  | inf          | #DIV/0! |
| MSH4    | 0.04761904762 | 0.04761904762 | 0.05555555556 |  | 0.7          | #DIV/0! |
| MSH5    | 0.04761904762 | 0.04761904762 | 0             |  | inf          | #DIV/0! |
| H5-SAPC | 0.04761904762 | 0.04761904762 | 0             |  | inf          | #DIV/0! |
| MSH6    | 0             | 0             | 0.05555555556 |  | 0            | #DIV/0! |
| MSI1    | 0             | 0             | 0.1111111111  |  | 0            | #DIV/0! |
| MSI2    | 0.09523809524 | 0.09523809524 | 0             |  | inf          | #DIV/0! |
| MSL1    | 0.09523809524 | 0.09523809524 | 0             |  | inf          | #DIV/0! |
| MSL2    | 0.1904761905  | 0.1904761905  | 0.05555555556 |  | 3.294117647  | #DIV/0! |
| MSL3P1  | 0             | 0             | 0.05555555556 |  | 0            | #DIV/0! |
| MSLN    | 0.04761904762 | 0.04761904762 | 0.2222222222  |  | 0.1375       | #DIV/0! |
| MSMB    | 0.04761904762 | 0.04761904762 | 0.05555555556 |  | 0.7          | #DIV/0! |
| MSMO1   | 0             | 0             | 0.1111111111  |  | 0            | #DIV/0! |
| MSMP    | 0.09523809524 | 0.09523809524 | 0.05555555556 |  | 1.473684211  | #DIV/0! |
| MSR1    | 0.09523809524 | 0.09523809524 | 0.1111111111  |  | 0.6842105263 | #DIV/0! |
| MSRA    | 0.09523809524 | 0.09523809524 | 0.1111111111  |  | 0.6842105263 | #DIV/0! |

|                |               |               |               |  |              |         |
|----------------|---------------|---------------|---------------|--|--------------|---------|
| <b>MSRB1</b>   | 0.09523809524 | 0.09523809524 | 0.222222222   |  | 0.2894736842 | #DIV/0! |
| <b>MSRB2</b>   | 0.09523809524 | 0.09523809524 | 0.1111111111  |  | 0.6842105263 | #DIV/0! |
| <b>MSRB3</b>   | 0.09523809524 | 0.09523809524 | 0.05555555556 |  | 1.473684211  | #DIV/0! |
| <b>MSS51</b>   | 0.1904761905  | 0.1904761905  | 0.05555555556 |  | 3.294117647  | #DIV/0! |
| <b>MST1</b>    | 0.09523809524 | 0.09523809524 | 0             |  | inf          | #DIV/0! |
| <b>MST1L</b>   | 0.04761904762 | 0.04761904762 | 0.1111111111  |  | 0.325        | #DIV/0! |
| <b>MST1P2</b>  | 0.04761904762 | 0.04761904762 | 0.1111111111  |  | 0.325        | #DIV/0! |
| <b>MST1R</b>   | 0.09523809524 | 0.09523809524 | 0             |  | inf          | #DIV/0! |
| <b>MSTN</b>    | 0             | 0             | 0.05555555556 |  | 0            | #DIV/0! |
| <b>MSTO1</b>   | 0.1904761905  | 0.1904761905  | 0.1111111111  |  | 1.529411765  | #DIV/0! |
| <b>MSTO2P</b>  | 0.1904761905  | 0.1904761905  | 0.1111111111  |  | 1.529411765  | #DIV/0! |
| <b>MSX2</b>    | 0             | 0             | 0.05555555556 |  | 0            | #DIV/0! |
| <b>MSX2P1</b>  | 0.09523809524 | 0.09523809524 | 0             |  | inf          | #DIV/0! |
| <b>MT1A</b>    | 0.04761904762 | 0.04761904762 | 0             |  | inf          | #DIV/0! |
| <b>MT1B</b>    | 0.04761904762 | 0.04761904762 | 0             |  | inf          | #DIV/0! |
| <b>MT1DP</b>   | 0.04761904762 | 0.04761904762 | 0             |  | inf          | #DIV/0! |
| <b>MT1E</b>    | 0.04761904762 | 0.04761904762 | 0             |  | inf          | #DIV/0! |
| <b>MT1F</b>    | 0.04761904762 | 0.04761904762 | 0             |  | inf          | #DIV/0! |
| <b>MT1G</b>    | 0.04761904762 | 0.04761904762 | 0             |  | inf          | #DIV/0! |
| <b>MT1H</b>    | 0.04761904762 | 0.04761904762 | 0             |  | inf          | #DIV/0! |
| <b>MT1HL1</b>  | 0.1428571429  | 0.1428571429  | 0             |  | inf          | #DIV/0! |
| <b>MT1IP</b>   | 0.04761904762 | 0.04761904762 | 0             |  | inf          | #DIV/0! |
| <b>MT1JP</b>   | 0.04761904762 | 0.04761904762 | 0             |  | inf          | #DIV/0! |
| <b>MT1L</b>    | 0.04761904762 | 0.04761904762 | 0             |  | inf          | #DIV/0! |
| <b>MT1M</b>    | 0.04761904762 | 0.04761904762 | 0             |  | inf          | #DIV/0! |
| <b>MT1X</b>    | 0.04761904762 | 0.04761904762 | 0             |  | inf          | #DIV/0! |
| <b>MT2A</b>    | 0.04761904762 | 0.04761904762 | 0             |  | inf          | #DIV/0! |
| <b>MT3</b>     | 0.04761904762 | 0.04761904762 | 0             |  | inf          | #DIV/0! |
| <b>MT4</b>     | 0.04761904762 | 0.04761904762 | 0             |  | inf          | #DIV/0! |
| <b>MTA3</b>    | 0             | 0             | 0.05555555556 |  | 0            | #DIV/0! |
| <b>MTBP</b>    | 0.09523809524 | 0.09523809524 | 0.1111111111  |  | 0.6842105263 | #DIV/0! |
| <b>MTCH1</b>   | 0.04761904762 | 0.04761904762 | 0.05555555556 |  | 0.7          | #DIV/0! |
| <b>MTCH2</b>   | 0             | 0             | 0.05555555556 |  | 0            | #DIV/0! |
| <b>MTCL1</b>   | 0.09523809524 | 0.09523809524 | 0             |  | inf          | #DIV/0! |
| <b>MTDH</b>    | 0.1904761905  | 0.1904761905  | 0.1111111111  |  | 1.529411765  | #DIV/0! |
| <b>MTERF1</b>  | 0.04761904762 | 0.04761904762 | 0.1111111111  |  | 0.325        | #DIV/0! |
| <b>MTERF2</b>  | 0.04761904762 | 0.04761904762 | 0.05555555556 |  | 0.7          | #DIV/0! |
| <b>MTERF3</b>  | 0.1904761905  | 0.1904761905  | 0.1666666667  |  | 0.9411764706 | #DIV/0! |
| <b>MTERF4</b>  | 0             | 0             | 0.05555555556 |  | 0            | #DIV/0! |
| <b>MTF1</b>    | 0.04761904762 | 0.04761904762 | 0.05555555556 |  | 0.7          | #DIV/0! |
| <b>MTF2</b>    | 0.04761904762 | 0.04761904762 | 0.05555555556 |  | 0.7          | #DIV/0! |
| <b>MTFM1</b>   | 0.04761904762 | 0.04761904762 | 0.05555555556 |  | 0.7          | #DIV/0! |
| <b>MTFP1</b>   | 0.04761904762 | 0.04761904762 | 0.1111111111  |  | 0.325        | #DIV/0! |
| <b>MTFR1</b>   | 0.1428571429  | 0.1428571429  | 0.1666666667  |  | 0.6666666667 | #DIV/0! |
| <b>MTFR11</b>  | 0.04761904762 | 0.04761904762 | 0.1111111111  |  | 0.325        | #DIV/0! |
| <b>MTG1</b>    | 0.1904761905  | 0.1904761905  | 0             |  | inf          | #DIV/0! |
| <b>MTG2</b>    | 0.1428571429  | 0.1428571429  | 0.2222222222  |  | 0.4583333333 | #DIV/0! |
| <b>MTHFD</b>   | 0.09523809524 | 0.09523809524 | 0             |  | inf          | #DIV/0! |
| <b>MTHFD1</b>  | 0             | 0             | 0.05555555556 |  | 0            | #DIV/0! |
| <b>MTHFD2</b>  | 0.09523809524 | 0.09523809524 | 0.05555555556 |  | 1.473684211  | #DIV/0! |
| <b>MTHFD21</b> | 0.04761904762 | 0.04761904762 | 0.05555555556 |  | 0.7          | #DIV/0! |

|        |               |               |               |  |              |         |
|--------|---------------|---------------|---------------|--|--------------|---------|
| MTHFR  | 0.04761904762 | 0.04761904762 | 0.1111111111  |  | 0.325        | #DIV/0! |
| MTHFS  | 0.04761904762 | 0.04761904762 | 0.05555555556 |  | 0.7          | #DIV/0! |
| ITHFSI | 0.04761904762 | 0.04761904762 | 0             |  | inf          | #DIV/0! |
| MTIF2  | 0.04761904762 | 0.04761904762 | 0.05555555556 |  | 0.7          | #DIV/0! |
| MTLN   | 0             | 0             | 0.05555555556 |  | 0            | #DIV/0! |
| MTMR1  | 0.1428571429  | 0.1428571429  | 0.05555555556 |  | 2.333333333  | #DIV/0! |
| ITMR12 | 0.04761904762 | 0.04761904762 | 0.05555555556 |  | 0.7          | #DIV/0! |
| ITMR14 | 0.09523809524 | 0.09523809524 | 0             |  | inf          | #DIV/0! |
| MTMR3  | 0.04761904762 | 0.04761904762 | 0.1111111111  |  | 0.325        | #DIV/0! |
| MTMR4  | 0.09523809524 | 0.09523809524 | 0             |  | inf          | #DIV/0! |
| MTMR7  | 0.09523809524 | 0.09523809524 | 0.1111111111  |  | 0.6842105263 | #DIV/0! |
| MTMR9  | 0.09523809524 | 0.09523809524 | 0.1111111111  |  | 0.6842105263 | #DIV/0! |
| TMR9L  | 0.04761904762 | 0.04761904762 | 0.1111111111  |  | 0.325        | #DIV/0! |
| ITNR1A | 0             | 0             | 0.05555555556 |  | 0            | #DIV/0! |
| MTO1   | 0.04761904762 | 0.04761904762 | 0             |  | inf          | #DIV/0! |
| MTOR   | 0.04761904762 | 0.04761904762 | 0.1111111111  |  | 0.325        | #DIV/0! |
| TOR-AS | 0.04761904762 | 0.04761904762 | 0.1111111111  |  | 0.325        | #DIV/0! |
| MTPAP  | 0.09523809524 | 0.09523809524 | 0.2222222222  |  | 0.2894736842 | #DIV/0! |
| MTPN   | 0.04761904762 | 0.04761904762 | 0.05555555556 |  | 0.7          | #DIV/0! |
| MTR    | 0.1428571429  | 0.1428571429  | 0             |  | inf          | #DIV/0! |
| MTREX  | 0.04761904762 | 0.04761904762 | 0.05555555556 |  | 0.7          | #DIV/0! |
| TRNR21 | 0.09523809524 | 0.09523809524 | 0.05555555556 |  | 1.473684211  | #DIV/0! |
| TRNR21 | 0.04761904762 | 0.04761904762 | 0             |  | inf          | #DIV/0! |
| TRNR21 | 0.1428571429  | 0.1428571429  | 0.2222222222  |  | 0.4583333333 | #DIV/0! |
| TRNR21 | 0.04761904762 | 0.04761904762 | 0.1111111111  |  | 0.325        | #DIV/0! |
| TRNR21 | 0.09523809524 | 0.09523809524 | 0.05555555556 |  | 1.473684211  | #DIV/0! |
| TRNR21 | 0.04761904762 | 0.04761904762 | 0.05555555556 |  | 0.7          | #DIV/0! |
| TRNR21 | 0.09523809524 | 0.09523809524 | 0.1111111111  |  | 0.6842105263 | #DIV/0! |
| MTRR   | 0             | 0             | 0.05555555556 |  | 0            | #DIV/0! |
| MTSS1  | 0.1428571429  | 0.1428571429  | 0.1111111111  |  | 1.083333333  | #DIV/0! |
| MTSS2  | 0.04761904762 | 0.04761904762 | 0             |  | inf          | #DIV/0! |
| MTTP   | 0             | 0             | 0.05555555556 |  | 0            | #DIV/0! |
| MTURN  | 0.04761904762 | 0.04761904762 | 0.1666666667  |  | 0.2          | #DIV/0! |
| MTUS1  | 0.09523809524 | 0.09523809524 | 0.1111111111  |  | 0.6842105263 | #DIV/0! |
| MTVR2  | 0.09523809524 | 0.09523809524 | 0             |  | inf          | #DIV/0! |
| MTX1   | 0.1904761905  | 0.1904761905  | 0.1111111111  |  | 1.529411765  | #DIV/0! |
| MTX2   | 0             | 0             | 0.1111111111  |  | 0            | #DIV/0! |
| MTX3   | 0.04761904762 | 0.04761904762 | 0             |  | inf          | #DIV/0! |
| MUC1   | 0.1904761905  | 0.1904761905  | 0.1111111111  |  | 1.529411765  | #DIV/0! |
| MUC12  | 0.04761904762 | 0.04761904762 | 0.05555555556 |  | 0.7          | #DIV/0! |
| MUC13  | 0.04761904762 | 0.04761904762 | 0.05555555556 |  | 0.7          | #DIV/0! |
| MUC16  | 0.1428571429  | 0.1428571429  | 0.05555555556 |  | 2.333333333  | #DIV/0! |
| MUC17  | 0.04761904762 | 0.04761904762 | 0.05555555556 |  | 0.7          | #DIV/0! |
| MUC19  | 0.04761904762 | 0.04761904762 | 0.05555555556 |  | 0.7          | #DIV/0! |
| MUC2   | 0.04761904762 | 0.04761904762 | 0             |  | inf          | #DIV/0! |
| MUC20  | 0.1428571429  | 0.1428571429  | 0.05555555556 |  | 2.333333333  | #DIV/0! |
| MUC3A  | 0.04761904762 | 0.04761904762 | 0.05555555556 |  | 0.7          | #DIV/0! |
| MUC4   | 0.1428571429  | 0.1428571429  | 0.05555555556 |  | 2.333333333  | #DIV/0! |
| MUC5A  | 0.04761904762 | 0.04761904762 | 0             |  | inf          | #DIV/0! |
| MUC5B  | 0.04761904762 | 0.04761904762 | 0             |  | inf          | #DIV/0! |
| UC5B-A | 0.04761904762 | 0.04761904762 | 0             |  | inf          | #DIV/0! |

|        |               |               |               |  |              |         |
|--------|---------------|---------------|---------------|--|--------------|---------|
| MUC6   | 0.04761904762 | 0.04761904762 | 0             |  | inf          | #DIV/0! |
| MUC7   | 0.04761904762 | 0.04761904762 | 0.05555555556 |  | 0.7          | #DIV/0! |
| MUCL1  | 0.04761904762 | 0.04761904762 | 0.05555555556 |  | 0.7          | #DIV/0! |
| MUL1   | 0.04761904762 | 0.04761904762 | 0.11111111111 |  | 0.325        | #DIV/0! |
| MUSK   | 0.04761904762 | 0.04761904762 | 0.05555555556 |  | 0.7          | #DIV/0! |
| MUSTN  | 0.04761904762 | 0.04761904762 | 0             |  | inf          | #DIV/0! |
| MUTYH  | 0.04761904762 | 0.04761904762 | 0.05555555556 |  | 0.7          | #DIV/0! |
| MVB12A | 0.1428571429  | 0.1428571429  | 0.11111111111 |  | 1.083333333  | #DIV/0! |
| MVB12B | 0.09523809524 | 0.09523809524 | 0.05555555556 |  | 1.473684211  | #DIV/0! |
| MVD    | 0.1428571429  | 0.1428571429  | 0             |  | inf          | #DIV/0! |
| MVK    | 0             | 0             | 0.05555555556 |  | 0            | #DIV/0! |
| MVP    | 0.04761904762 | 0.04761904762 | 0             |  | inf          | #DIV/0! |
| MX1    | 0.04761904762 | 0.04761904762 | 0.11111111111 |  | 0.325        | #DIV/0! |
| MX2    | 0.04761904762 | 0.04761904762 | 0.11111111111 |  | 0.325        | #DIV/0! |
| MXD1   | 0             | 0             | 0.05555555556 |  | 0            | #DIV/0! |
| MXD3   | 0.09523809524 | 0.09523809524 | 0.05555555556 |  | 1.473684211  | #DIV/0! |
| MXD4   | 0.04761904762 | 0.04761904762 | 0             |  | inf          | #DIV/0! |
| MXI1   | 0.1428571429  | 0.1428571429  | 0.05555555556 |  | 2.333333333  | #DIV/0! |
| MXRA7  | 0.04761904762 | 0.04761904762 | 0             |  | inf          | #DIV/0! |
| MXRA8  | 0             | 0             | 0.11111111111 |  | 0            | #DIV/0! |
| MYADM  | 0.09523809524 | 0.09523809524 | 0.05555555556 |  | 1.473684211  | #DIV/0! |
| YADM1  | 0.04761904762 | 0.04761904762 | 0             |  | inf          | #DIV/0! |
| YBBP1  | 0             | 0             | 0.11111111111 |  | 0            | #DIV/0! |
| MYBL1  | 0.1428571429  | 0.1428571429  | 0.16666666667 |  | 0.6666666667 | #DIV/0! |
| MYBL2  | 0.1428571429  | 0.1428571429  | 0.11111111111 |  | 1.083333333  | #DIV/0! |
| MYBPC1 | 0.04761904762 | 0.04761904762 | 0.05555555556 |  | 0.7          | #DIV/0! |
| MYBPC2 | 0.09523809524 | 0.09523809524 | 0.11111111111 |  | 0.6842105263 | #DIV/0! |
| MYBPC3 | 0             | 0             | 0.05555555556 |  | 0            | #DIV/0! |
| MYBPH  | 0.1428571429  | 0.1428571429  | 0             |  | inf          | #DIV/0! |
| YBPH1  | 0.04761904762 | 0.04761904762 | 0.05555555556 |  | 0.7          | #DIV/0! |
| MYC    | 0.09523809524 | 0.09523809524 | 0.11111111111 |  | 0.6842105263 | #DIV/0! |
| MYCBP  | 0.04761904762 | 0.04761904762 | 0.05555555556 |  | 0.7          | #DIV/0! |
| MYCBP2 | 0             | 0             | 0.05555555556 |  | 0            | #DIV/0! |
| CBP2-A | 0             | 0             | 0.05555555556 |  | 0            | #DIV/0! |
| YCBPA  | 0.09523809524 | 0.09523809524 | 0             |  | inf          | #DIV/0! |
| MYCL   | 0.04761904762 | 0.04761904762 | 0.05555555556 |  | 0.7          | #DIV/0! |
| MYCN   | 0             | 0             | 0.05555555556 |  | 0            | #DIV/0! |
| YCNOS  | 0             | 0             | 0.05555555556 |  | 0            | #DIV/0! |
| YCNU   | 0             | 0             | 0.05555555556 |  | 0            | #DIV/0! |
| MYD88  | 0.04761904762 | 0.04761904762 | 0             |  | inf          | #DIV/0! |
| MYDGF  | 0.09523809524 | 0.09523809524 | 0.05555555556 |  | 1.473684211  | #DIV/0! |
| MYEF2  | 0.04761904762 | 0.04761904762 | 0.05555555556 |  | 0.7          | #DIV/0! |
| MYF5   | 0.04761904762 | 0.04761904762 | 0.05555555556 |  | 0.7          | #DIV/0! |
| MYF6   | 0.04761904762 | 0.04761904762 | 0.05555555556 |  | 0.7          | #DIV/0! |
| MYH1   | 0.04761904762 | 0.04761904762 | 0.05555555556 |  | 0.7          | #DIV/0! |
| MYH10  | 0.04761904762 | 0.04761904762 | 0.05555555556 |  | 0.7          | #DIV/0! |
| MYH11  | 0.04761904762 | 0.04761904762 | 0             |  | inf          | #DIV/0! |
| MYH13  | 0.04761904762 | 0.04761904762 | 0.05555555556 |  | 0.7          | #DIV/0! |
| MYH14  | 0.09523809524 | 0.09523809524 | 0.11111111111 |  | 0.6842105263 | #DIV/0! |
| MYH15  | 0.09523809524 | 0.09523809524 | 0.05555555556 |  | 1.473684211  | #DIV/0! |
| MYH16  | 0.04761904762 | 0.04761904762 | 0.05555555556 |  | 0.7          | #DIV/0! |

|        |               |               |               |  |              |         |
|--------|---------------|---------------|---------------|--|--------------|---------|
| MYH2   | 0.04761904762 | 0.04761904762 | 0.05555555556 |  | 0.7          | #DIV/0! |
| MYH3   | 0.04761904762 | 0.04761904762 | 0.05555555556 |  | 0.7          | #DIV/0! |
| MYH4   | 0.04761904762 | 0.04761904762 | 0.05555555556 |  | 0.7          | #DIV/0! |
| MYH6   | 0             | 0             | 0.05555555556 |  | 0            | #DIV/0! |
| MYH7   | 0             | 0             | 0.05555555556 |  | 0            | #DIV/0! |
| MYH7B  | 0.09523809524 | 0.09523809524 | 0.1111111111  |  | 0.6842105263 | #DIV/0! |
| MYH8   | 0.04761904762 | 0.04761904762 | 0.05555555556 |  | 0.7          | #DIV/0! |
| MYH9   | 0             | 0             | 0.1111111111  |  | 0            | #DIV/0! |
| MYHAS  | 0.04761904762 | 0.04761904762 | 0.05555555556 |  | 0.7          | #DIV/0! |
| MYL1   | 0             | 0             | 0.05555555556 |  | 0            | #DIV/0! |
| MYL10  | 0.04761904762 | 0.04761904762 | 0.05555555556 |  | 0.7          | #DIV/0! |
| MYL12A | 0.09523809524 | 0.09523809524 | 0             |  | inf          | #DIV/0! |
| MYL12B | 0.09523809524 | 0.09523809524 | 0             |  | inf          | #DIV/0! |
| MYL2   | 0             | 0             | 0.1111111111  |  | 0            | #DIV/0! |
| MYL4   | 0.1428571429  | 0.1428571429  | 0             |  | inf          | #DIV/0! |
| MYL5   | 0.04761904762 | 0.04761904762 | 0             |  | inf          | #DIV/0! |
| MYL6   | 0.09523809524 | 0.09523809524 | 0.05555555556 |  | 1.473684211  | #DIV/0! |
| MYL6B  | 0.09523809524 | 0.09523809524 | 0.05555555556 |  | 1.473684211  | #DIV/0! |
| MYL7   | 0.04761904762 | 0.04761904762 | 0.1666666667  |  | 0.2          | #DIV/0! |
| MYL9   | 0.09523809524 | 0.09523809524 | 0.1111111111  |  | 0.6842105263 | #DIV/0! |
| MYLK   | 0.04761904762 | 0.04761904762 | 0.05555555556 |  | 0.7          | #DIV/0! |
| YLK-AS | 0.04761904762 | 0.04761904762 | 0.05555555556 |  | 0.7          | #DIV/0! |
| YLK-AS | 0.04761904762 | 0.04761904762 | 0.05555555556 |  | 0.7          | #DIV/0! |
| MYLK2  | 0.09523809524 | 0.09523809524 | 0.1111111111  |  | 0.6842105263 | #DIV/0! |
| MYLK3  | 0.04761904762 | 0.04761904762 | 0             |  | inf          | #DIV/0! |
| MYLPF  | 0.04761904762 | 0.04761904762 | 0             |  | inf          | #DIV/0! |
| MYMK   | 0.04761904762 | 0.04761904762 | 0             |  | inf          | #DIV/0! |
| MYMX   | 0.04761904762 | 0.04761904762 | 0.05555555556 |  | 0.7          | #DIV/0! |
| MYNN   | 0.1904761905  | 0.1904761905  | 0.05555555556 |  | 3.294117647  | #DIV/0! |
| MYO10  | 0.04761904762 | 0.04761904762 | 0.05555555556 |  | 0.7          | #DIV/0! |
| MYO15A | 0.04761904762 | 0.04761904762 | 0.1111111111  |  | 0.325        | #DIV/0! |
| MYO18A | 0.04761904762 | 0.04761904762 | 0.05555555556 |  | 0.7          | #DIV/0! |
| MYO18E | 0.04761904762 | 0.04761904762 | 0.05555555556 |  | 0.7          | #DIV/0! |
| MYO19  | 0.04761904762 | 0.04761904762 | 0             |  | inf          | #DIV/0! |
| MYO1A  | 0.1428571429  | 0.1428571429  | 0.05555555556 |  | 2.333333333  | #DIV/0! |
| MYO1B  | 0             | 0             | 0.05555555556 |  | 0            | #DIV/0! |
| MYO1C  | 0             | 0             | 0.1111111111  |  | 0            | #DIV/0! |
| MYO1D  | 0.04761904762 | 0.04761904762 | 0             |  | inf          | #DIV/0! |
| MYO1E  | 0.04761904762 | 0.04761904762 | 0.05555555556 |  | 0.7          | #DIV/0! |
| MYO1F  | 0.1428571429  | 0.1428571429  | 0.05555555556 |  | 2.333333333  | #DIV/0! |
| MYO1G  | 0.04761904762 | 0.04761904762 | 0.2222222222  |  | 0.1375       | #DIV/0! |
| MYO1H  | 0             | 0             | 0.05555555556 |  | 0            | #DIV/0! |
| MYO3A  | 0.09523809524 | 0.09523809524 | 0.1111111111  |  | 0.6842105263 | #DIV/0! |
| MYO3B  | 0             | 0             | 0.05555555556 |  | 0            | #DIV/0! |
| YO3B-A | 0             | 0             | 0.05555555556 |  | 0            | #DIV/0! |
| MYO5A  | 0.04761904762 | 0.04761904762 | 0.05555555556 |  | 0.7          | #DIV/0! |
| MYO5B  | 0.04761904762 | 0.04761904762 | 0             |  | inf          | #DIV/0! |
| MYO5C  | 0.04761904762 | 0.04761904762 | 0.05555555556 |  | 0.7          | #DIV/0! |
| MYO7B  | 0             | 0             | 0.05555555556 |  | 0            | #DIV/0! |
| MYO9A  | 0.04761904762 | 0.04761904762 | 0.05555555556 |  | 0.7          | #DIV/0! |
| MYO9B  | 0.1428571429  | 0.1428571429  | 0.1111111111  |  | 1.083333333  | #DIV/0! |

|        |               |               |               |  |              |         |
|--------|---------------|---------------|---------------|--|--------------|---------|
| MYOC   | 0.1428571429  | 0.1428571429  | 0.05555555556 |  | 2.333333333  | #DIV/0! |
| MYOCD  | 0.04761904762 | 0.04761904762 | 0.05555555556 |  | 0.7          | #DIV/0! |
| YOCO   | 0.1428571429  | 0.1428571429  | 0.05555555556 |  | 2.333333333  | #DIV/0! |
| MYOF   | 0.1428571429  | 0.1428571429  | 0.1111111111  |  | 1.083333333  | #DIV/0! |
| MYOG   | 0.1428571429  | 0.1428571429  | 0             |  | inf          | #DIV/0! |
| MYOM1  | 0.09523809524 | 0.09523809524 | 0             |  | inf          | #DIV/0! |
| MYOM2  | 0.1428571429  | 0.1428571429  | 0.1111111111  |  | 1.083333333  | #DIV/0! |
| MYOM3  | 0.04761904762 | 0.04761904762 | 0.1111111111  |  | 0.325        | #DIV/0! |
| YOPAR  | 0.1428571429  | 0.1428571429  | 0             |  | inf          | #DIV/0! |
| MYORG  | 0.09523809524 | 0.09523809524 | 0.05555555556 |  | 1.473684211  | #DIV/0! |
| IYOSLI | 0             | 0             | 0.05555555556 |  | 0            | #DIV/0! |
| OSLID- | 0             | 0             | 0.05555555556 |  | 0            | #DIV/0! |
| MYOT   | 0.04761904762 | 0.04761904762 | 0             |  | inf          | #DIV/0! |
| MYOZ1  | 0.1904761905  | 0.1904761905  | 0.05555555556 |  | 3.294117647  | #DIV/0! |
| MYOZ2  | 0             | 0             | 0.05555555556 |  | 0            | #DIV/0! |
| MYPN   | 0.1904761905  | 0.1904761905  | 0.05555555556 |  | 3.294117647  | #DIV/0! |
| MYPOP  | 0.09523809524 | 0.09523809524 | 0.1111111111  |  | 0.6842105263 | #DIV/0! |
| MYRFL  | 0.09523809524 | 0.09523809524 | 0.1111111111  |  | 0.6842105263 | #DIV/0! |
| MYRIP  | 0.04761904762 | 0.04761904762 | 0             |  | inf          | #DIV/0! |
| MYSM1  | 0.04761904762 | 0.04761904762 | 0.05555555556 |  | 0.7          | #DIV/0! |
| MYT1   | 0.1428571429  | 0.1428571429  | 0.2222222222  |  | 0.4583333333 | #DIV/0! |
| MYT1L  | 0             | 0             | 0.05555555556 |  | 0            | #DIV/0! |
| YT1L-A | 0             | 0             | 0.05555555556 |  | 0            | #DIV/0! |
| MYZAP  | 0.04761904762 | 0.04761904762 | 0.05555555556 |  | 0.7          | #DIV/0! |
| MZB1   | 0.04761904762 | 0.04761904762 | 0             |  | inf          | #DIV/0! |
| MZF1   | 0.1428571429  | 0.1428571429  | 0.05555555556 |  | 2.333333333  | #DIV/0! |
| ZF1-AS | 0.1428571429  | 0.1428571429  | 0.05555555556 |  | 2.333333333  | #DIV/0! |
| MZT2A  | 0             | 0             | 0.05555555556 |  | 0            | #DIV/0! |
| MZT2B  | 0             | 0             | 0.05555555556 |  | 0            | #DIV/0! |
| N4BP1  | 0.04761904762 | 0.04761904762 | 0             |  | inf          | #DIV/0! |
| N4BP2  | 0.1904761905  | 0.1904761905  | 0.05555555556 |  | 3.294117647  | #DIV/0! |
| N4BP3  | 0.09523809524 | 0.09523809524 | 0.05555555556 |  | 1.473684211  | #DIV/0! |
| N6AMT1 | 0.04761904762 | 0.04761904762 | 0.1111111111  |  | 0.325        | #DIV/0! |
| NAA11  | 0.04761904762 | 0.04761904762 | 0.05555555556 |  | 0.7          | #DIV/0! |
| NAA15  | 0.04761904762 | 0.04761904762 | 0.05555555556 |  | 0.7          | #DIV/0! |
| NAA20  | 0.1904761905  | 0.1904761905  | 0.05555555556 |  | 3.294117647  | #DIV/0! |
| NAA25  | 0             | 0             | 0.1111111111  |  | 0            | #DIV/0! |
| NAA30  | 0.04761904762 | 0.04761904762 | 0             |  | inf          | #DIV/0! |
| NAA35  | 0             | 0             | 0.05555555556 |  | 0            | #DIV/0! |
| NAA38  | 0             | 0             | 0.05555555556 |  | 0            | #DIV/0! |
| NAA50  | 0.09523809524 | 0.09523809524 | 0.05555555556 |  | 1.473684211  | #DIV/0! |
| NAA60  | 0.04761904762 | 0.04761904762 | 0.1111111111  |  | 0.325        | #DIV/0! |
| NAA80  | 0.09523809524 | 0.09523809524 | 0             |  | inf          | #DIV/0! |
| NAAA   | 0.04761904762 | 0.04761904762 | 0.05555555556 |  | 0.7          | #DIV/0! |
| AALAD1 | 0.1904761905  | 0.1904761905  | 0.05555555556 |  | 3.294117647  | #DIV/0! |
| LADL2  | 0.1904761905  | 0.1904761905  | 0.05555555556 |  | 3.294117647  | #DIV/0! |
| LADL2  | 0.1904761905  | 0.1904761905  | 0.05555555556 |  | 3.294117647  | #DIV/0! |
| LADL2  | 0.1904761905  | 0.1904761905  | 0.05555555556 |  | 3.294117647  | #DIV/0! |
| NAB1   | 0             | 0             | 0.05555555556 |  | 0            | #DIV/0! |
| NAB2   | 0.1428571429  | 0.1428571429  | 0.05555555556 |  | 2.333333333  | #DIV/0! |
| NABP1  | 0             | 0             | 0.05555555556 |  | 0            | #DIV/0! |

|        |               |               |               |  |              |         |
|--------|---------------|---------------|---------------|--|--------------|---------|
| NABP2  | 0.09523809524 | 0.09523809524 | 0.05555555556 |  | 1.473684211  | #DIV/0! |
| NACA   | 0.1428571429  | 0.1428571429  | 0.05555555556 |  | 2.333333333  | #DIV/0! |
| NACA2  | 0.09523809524 | 0.09523809524 | 0             |  | inf          | #DIV/0! |
| NACA4F | 0.1904761905  | 0.1904761905  | 0.1111111111  |  | 1.529411765  | #DIV/0! |
| NACAD  | 0.04761904762 | 0.04761904762 | 0.2222222222  |  | 0.1375       | #DIV/0! |
| NACCI  | 0.1428571429  | 0.1428571429  | 0.1111111111  |  | 1.083333333  | #DIV/0! |
| NACC2  | 0.1428571429  | 0.1428571429  | 0.05555555556 |  | 2.333333333  | #DIV/0! |
| NADK   | 0             | 0             | 0.1111111111  |  | 0            | #DIV/0! |
| NADK2  | 0.04761904762 | 0.04761904762 | 0.05555555556 |  | 0.7          | #DIV/0! |
| NAE1   | 0.09523809524 | 0.09523809524 | 0.05555555556 |  | 1.473684211  | #DIV/0! |
| NAF1   | 0             | 0             | 0.05555555556 |  | 0            | #DIV/0! |
| NAGA   | 0             | 0             | 0.1111111111  |  | 0            | #DIV/0! |
| NAGK   | 0             | 0             | 0.05555555556 |  | 0            | #DIV/0! |
| NAGPA  | 0.04761904762 | 0.04761904762 | 0             |  | inf          | #DIV/0! |
| AGPA-A | 0.04761904762 | 0.04761904762 | 0             |  | inf          | #DIV/0! |
| NAGS   | 0.09523809524 | 0.09523809524 | 0             |  | inf          | #DIV/0! |
| NAIF1  | 0.09523809524 | 0.09523809524 | 0.05555555556 |  | 1.473684211  | #DIV/0! |
| NAIP   | 0.09523809524 | 0.09523809524 | 0.1666666667  |  | 0.4210526316 | #DIV/0! |
| NALT1  | 0.1428571429  | 0.1428571429  | 0.05555555556 |  | 2.333333333  | #DIV/0! |
| NAMA   | 0.04761904762 | 0.04761904762 | 0             |  | inf          | #DIV/0! |
| NAMPT  | 0.04761904762 | 0.04761904762 | 0.05555555556 |  | 0.7          | #DIV/0! |
| NANOG  | 0.04761904762 | 0.04761904762 | 0.1111111111  |  | 0.325        | #DIV/0! |
| ANOGN  | 0.04761904762 | 0.04761904762 | 0.1111111111  |  | 0.325        | #DIV/0! |
| NANOS1 | 0.2380952381  | 0.2380952381  | 0             |  | inf          | #DIV/0! |
| NANOS2 | 0.09523809524 | 0.09523809524 | 0.1111111111  |  | 0.6842105263 | #DIV/0! |
| NANOS3 | 0.1428571429  | 0.1428571429  | 0.1111111111  |  | 1.083333333  | #DIV/0! |
| NANP   | 0.1904761905  | 0.1904761905  | 0.05555555556 |  | 3.294117647  | #DIV/0! |
| NANS   | 0.04761904762 | 0.04761904762 | 0             |  | inf          | #DIV/0! |
| NAPIL1 | 0.04761904762 | 0.04761904762 | 0.1111111111  |  | 0.325        | #DIV/0! |
| NAPIL4 | 0.04761904762 | 0.04761904762 | 0             |  | inf          | #DIV/0! |
| NAPIL5 | 0             | 0             | 0.05555555556 |  | 0            | #DIV/0! |
| NAPA   | 0.09523809524 | 0.09523809524 | 0.1111111111  |  | 0.6842105263 | #DIV/0! |
| APA-AS | 0.09523809524 | 0.09523809524 | 0.1111111111  |  | 0.6842105263 | #DIV/0! |
| NAPB   | 0.1904761905  | 0.1904761905  | 0.05555555556 |  | 3.294117647  | #DIV/0! |
| APEPL  | 0.04761904762 | 0.04761904762 | 0.05555555556 |  | 0.7          | #DIV/0! |
| NAPG   | 0.09523809524 | 0.09523809524 | 0             |  | inf          | #DIV/0! |
| NAPRT  | 0.04761904762 | 0.04761904762 | 0.1666666667  |  | 0.2          | #DIV/0! |
| NAPSA  | 0.09523809524 | 0.09523809524 | 0.1111111111  |  | 0.6842105263 | #DIV/0! |
| NAPSB  | 0.09523809524 | 0.09523809524 | 0.1111111111  |  | 0.6842105263 | #DIV/0! |
| NARF   | 0.04761904762 | 0.04761904762 | 0             |  | inf          | #DIV/0! |
| NARS   | 0.09523809524 | 0.09523809524 | 0             |  | inf          | #DIV/0! |
| NASP   | 0.04761904762 | 0.04761904762 | 0.05555555556 |  | 0.7          | #DIV/0! |
| NAT1   | 0.09523809524 | 0.09523809524 | 0.1111111111  |  | 0.6842105263 | #DIV/0! |
| NAT14  | 0.09523809524 | 0.09523809524 | 0.05555555556 |  | 1.473684211  | #DIV/0! |
| NAT16  | 0.04761904762 | 0.04761904762 | 0.05555555556 |  | 0.7          | #DIV/0! |
| NAT2   | 0.09523809524 | 0.09523809524 | 0.1111111111  |  | 0.6842105263 | #DIV/0! |
| NAT8   | 0             | 0             | 0.05555555556 |  | 0            | #DIV/0! |
| NAT8B  | 0             | 0             | 0.05555555556 |  | 0            | #DIV/0! |
| NAT8L  | 0.04761904762 | 0.04761904762 | 0             |  | inf          | #DIV/0! |
| NAT9   | 0.04761904762 | 0.04761904762 | 0             |  | inf          | #DIV/0! |
| NATD1  | 0.09523809524 | 0.09523809524 | 0.05555555556 |  | 1.473684211  | #DIV/0! |

|         |               |               |               |  |              |         |
|---------|---------------|---------------|---------------|--|--------------|---------|
| NAV1    | 0.1428571429  | 0.1428571429  | 0             |  | inf          | #DIV/0! |
| NAV3    | 0.04761904762 | 0.04761904762 | 0.05555555556 |  | 0.7          | #DIV/0! |
| NAXE    | 0.1428571429  | 0.1428571429  | 0.1111111111  |  | 1.083333333  | #DIV/0! |
| NBAS    | 0             | 0             | 0.05555555556 |  | 0            | #DIV/0! |
| NBEAL1  | 0.09523809524 | 0.09523809524 | 0.05555555556 |  | 1.473684211  | #DIV/0! |
| NBEAP1  | 0.2857142857  | 0.2857142857  | 0.1111111111  |  | 2.6          | #DIV/0! |
| NBL1    | 0.04761904762 | 0.04761904762 | 0.1111111111  |  | 0.325        | #DIV/0! |
| NBN     | 0.1904761905  | 0.1904761905  | 0.1111111111  |  | 1.529411765  | #DIV/0! |
| NBPF1   | 0.04761904762 | 0.04761904762 | 0.1111111111  |  | 0.325        | #DIV/0! |
| NBPF10  | 0.1428571429  | 0.1428571429  | 0.05555555556 |  | 2.333333333  | #DIV/0! |
| NBPF11  | 0.1428571429  | 0.1428571429  | 0.05555555556 |  | 2.333333333  | #DIV/0! |
| NBPF12  | 0.1428571429  | 0.1428571429  | 0.05555555556 |  | 2.333333333  | #DIV/0! |
| NBPF13  | 0.1428571429  | 0.1428571429  | 0.05555555556 |  | 2.333333333  | #DIV/0! |
| NBPF14  | 0.1428571429  | 0.1428571429  | 0.05555555556 |  | 2.333333333  | #DIV/0! |
| NBPF15  | 0.1428571429  | 0.1428571429  | 0.05555555556 |  | 2.333333333  | #DIV/0! |
| NBPF18  | 0.1904761905  | 0.1904761905  | 0             |  | inf          | #DIV/0! |
| NBPF19  | 0.1428571429  | 0.1428571429  | 0.05555555556 |  | 2.333333333  | #DIV/0! |
| NBPF20  | 0.1428571429  | 0.1428571429  | 0.05555555556 |  | 2.333333333  | #DIV/0! |
| NBPF22  | 0.04761904762 | 0.04761904762 | 0             |  | inf          | #DIV/0! |
| NBPF25  | 0.1428571429  | 0.1428571429  | 0.05555555556 |  | 2.333333333  | #DIV/0! |
| NBPF26  | 0.1428571429  | 0.1428571429  | 0.05555555556 |  | 2.333333333  | #DIV/0! |
| NBPF3   | 0.04761904762 | 0.04761904762 | 0.1111111111  |  | 0.325        | #DIV/0! |
| NBPF4   | 0.04761904762 | 0.04761904762 | 0.05555555556 |  | 0.7          | #DIV/0! |
| NBPF6   | 0.04761904762 | 0.04761904762 | 0.05555555556 |  | 0.7          | #DIV/0! |
| NBPF7   | 0.04761904762 | 0.04761904762 | 0.05555555556 |  | 0.7          | #DIV/0! |
| NBPF8   | 0.09523809524 | 0.09523809524 | 0.05555555556 |  | 1.473684211  | #DIV/0! |
| NBPF9   | 0.1428571429  | 0.1428571429  | 0.05555555556 |  | 2.333333333  | #DIV/0! |
| NBR1    | 0.04761904762 | 0.04761904762 | 0             |  | inf          | #DIV/0! |
| NBR2    | 0.04761904762 | 0.04761904762 | 0             |  | inf          | #DIV/0! |
| NCALD   | 0.1904761905  | 0.1904761905  | 0.1111111111  |  | 1.529411765  | #DIV/0! |
| NCAM2   | 0.04761904762 | 0.04761904762 | 0.1666666667  |  | 0.2          | #DIV/0! |
| NCAN    | 0.1428571429  | 0.1428571429  | 0.1111111111  |  | 1.083333333  | #DIV/0! |
| NCAPD2  | 0.04761904762 | 0.04761904762 | 0.1111111111  |  | 0.325        | #DIV/0! |
| NCAPG   | 0             | 0             | 0             |  |              | #DIV/0! |
| NCAPG2  | 0.1428571429  | 0.1428571429  | 0.05555555556 |  | 2.333333333  | #DIV/0! |
| NCAPH   | 0             | 0             | 0.1111111111  |  | 0            | #DIV/0! |
| NCAPH2  | 0             | 0             | 0.1111111111  |  | 0            | #DIV/0! |
| NCBP1   | 0.04761904762 | 0.04761904762 | 0             |  | inf          | #DIV/0! |
| NCBP2   | 0.1428571429  | 0.1428571429  | 0.05555555556 |  | 2.333333333  | #DIV/0! |
| CBP2-AS | 0.1428571429  | 0.1428571429  | 0.05555555556 |  | 2.333333333  | #DIV/0! |
| CBP2AS  | 0.1428571429  | 0.1428571429  | 0.05555555556 |  | 2.333333333  | #DIV/0! |
| NCBP3   | 0             | 0             | 0.1111111111  |  | 0            | #DIV/0! |
| NCCRPI  | 0.04761904762 | 0.04761904762 | 0.05555555556 |  | 0.7          | #DIV/0! |
| NCDN    | 0.04761904762 | 0.04761904762 | 0.05555555556 |  | 0.7          | #DIV/0! |
| NCEH1   | 0.1904761905  | 0.1904761905  | 0.05555555556 |  | 3.294117647  | #DIV/0! |
| NCF1    | 0.1428571429  | 0.1428571429  | 0.1666666667  |  | 0.6666666667 | #DIV/0! |
| NCF1B   | 0.1428571429  | 0.1428571429  | 0.1111111111  |  | 1.083333333  | #DIV/0! |
| NCF1C   | 0.1428571429  | 0.1428571429  | 0.1666666667  |  | 0.6666666667 | #DIV/0! |
| NCF4    | 0             | 0             | 0.1111111111  |  | 0            | #DIV/0! |
| CF4-AS  | 0             | 0             | 0.1111111111  |  | 0            | #DIV/0! |
| NCK1    | 0.1904761905  | 0.1904761905  | 0.05555555556 |  | 3.294117647  | #DIV/0! |



|          |               |               |               |  |               |         |
|----------|---------------|---------------|---------------|--|---------------|---------|
| CK1-D    | 0.1904761905  | 0.1904761905  | 0.05555555556 |  | 3.294117647   | #DIV/0! |
| NCK2     | 0             | 0             | 0.05555555556 |  | 0             | #DIV/0! |
| NCKAP1   | 0             | 0             | 0.05555555556 |  | 0             | #DIV/0! |
| CKAP1    | 0.04761904762 | 0.04761904762 | 0.05555555556 |  | 0.7           | #DIV/0! |
| NCKAP5   | 0             | 0             | 0.05555555556 |  | 0             | #DIV/0! |
| KAP5-A   | 0             | 0             | 0.05555555556 |  | 0             | #DIV/0! |
| KAP5-A   | 0             | 0             | 0.05555555556 |  | 0             | #DIV/0! |
| CKAP5    | 0.04761904762 | 0.04761904762 | 0.05555555556 |  | 0.7           | #DIV/0! |
| CKIP5    | 0.09523809524 | 0.09523809524 | 0             |  | inf           | #DIV/0! |
| NCL      | 0             | 0             | 0.05555555556 |  | 0             | #DIV/0! |
| NCLN     | 0.09523809524 | 0.09523809524 | 0.05555555556 |  | 1.473684211   | #DIV/0! |
| NCMAP    | 0.04761904762 | 0.04761904762 | 0.11111111111 |  | 0.325         | #DIV/0! |
| NCOA2    | 0.1904761905  | 0.1904761905  | 0.16666666667 |  | 0.9411764706  | #DIV/0! |
| NCOA3    | 0.1428571429  | 0.1428571429  | 0.16666666667 |  | 0.66666666667 | #DIV/0! |
| NCOA4    | 0.04761904762 | 0.04761904762 | 0.05555555556 |  | 0.7           | #DIV/0! |
| NCOA5    | 0.1428571429  | 0.1428571429  | 0.16666666667 |  | 0.66666666667 | #DIV/0! |
| NCOA6    | 0.09523809524 | 0.09523809524 | 0.11111111111 |  | 0.6842105263  | #DIV/0! |
| NCOR1    | 0.04761904762 | 0.04761904762 | 0.05555555556 |  | 0.7           | #DIV/0! |
| COR1P    | 0.1904761905  | 0.1904761905  | 0.05555555556 |  | 3.294117647   | #DIV/0! |
| NCOR2    | 0.04761904762 | 0.04761904762 | 0.05555555556 |  | 0.7           | #DIV/0! |
| NCR1     | 0.09523809524 | 0.09523809524 | 0.05555555556 |  | 1.473684211   | #DIV/0! |
| NCR2     | 0             | 0             | 0.05555555556 |  | 0             | #DIV/0! |
| NCR3     | 0.04761904762 | 0.04761904762 | 0             |  | inf           | #DIV/0! |
| RNA002   | 0.04761904762 | 0.04761904762 | 0.22222222222 |  | 0.1375        | #DIV/0! |
| CRUPA    | 0.04761904762 | 0.04761904762 | 0             |  | inf           | #DIV/0! |
| NCS1     | 0.09523809524 | 0.09523809524 | 0.05555555556 |  | 1.473684211   | #DIV/0! |
| NDC1     | 0.04761904762 | 0.04761904762 | 0.05555555556 |  | 0.7           | #DIV/0! |
| NDC80    | 0.09523809524 | 0.09523809524 | 0             |  | inf           | #DIV/0! |
| NDE1     | 0.04761904762 | 0.04761904762 | 0             |  | inf           | #DIV/0! |
| NDEL1    | 0.04761904762 | 0.04761904762 | 0.05555555556 |  | 0.7           | #DIV/0! |
| NDFIP1   | 0.04761904762 | 0.04761904762 | 0             |  | inf           | #DIV/0! |
| NDNF     | 0             | 0             | 0.05555555556 |  | 0             | #DIV/0! |
| NDOR1    | 0.1428571429  | 0.1428571429  | 0.05555555556 |  | 2.333333333   | #DIV/0! |
| NDRG1    | 0.04761904762 | 0.04761904762 | 0.22222222222 |  | 0.1375        | #DIV/0! |
| NDRG3    | 0.09523809524 | 0.09523809524 | 0.11111111111 |  | 0.6842105263  | #DIV/0! |
| NDRG4    | 0.04761904762 | 0.04761904762 | 0             |  | inf           | #DIV/0! |
| NDST2    | 0.1904761905  | 0.1904761905  | 0.05555555556 |  | 3.294117647   | #DIV/0! |
| NDST3    | 0             | 0             | 0.05555555556 |  | 0             | #DIV/0! |
| NDST4    | 0             | 0             | 0.05555555556 |  | 0             | #DIV/0! |
| NDUFA1   | 0             | 0             | 0.05555555556 |  | 0             | #DIV/0! |
| NDUFA1   | 0.1428571429  | 0.1428571429  | 0.05555555556 |  | 2.333333333   | #DIV/0! |
| NDUFA1   | 0.04761904762 | 0.04761904762 | 0.05555555556 |  | 0.7           | #DIV/0! |
| NDUFA1   | 0.1428571429  | 0.1428571429  | 0.11111111111 |  | 1.083333333   | #DIV/0! |
| NDUFA2   | 0.04761904762 | 0.04761904762 | 0             |  | inf           | #DIV/0! |
| NDUFA3   | 0.09523809524 | 0.09523809524 | 0.05555555556 |  | 1.473684211   | #DIV/0! |
| NDUFA4   | 0.04761904762 | 0.04761904762 | 0.22222222222 |  | 0.1375        | #DIV/0! |
| NDUFA4   | 0.1428571429  | 0.1428571429  | 0.05555555556 |  | 2.333333333   | #DIV/0! |
| NDUFA5   | 0.04761904762 | 0.04761904762 | 0.05555555556 |  | 0.7           | #DIV/0! |
| NDUFA6   | 0             | 0             | 0.11111111111 |  | 0             | #DIV/0! |
| NDUFA6-I | 0             | 0             | 0.11111111111 |  | 0             | #DIV/0! |
| NDUFA7   | 0.1428571429  | 0.1428571429  | 0.05555555556 |  | 2.333333333   | #DIV/0! |

|          |               |               |               |  |              |         |
|----------|---------------|---------------|---------------|--|--------------|---------|
| NDUFA8   | 0.09523809524 | 0.09523809524 | 0.05555555556 |  | 1.473684211  | #DIV/0! |
| NDUFA9   | 0.04761904762 | 0.04761904762 | 0.11111111111 |  | 0.325        | #DIV/0! |
| UDUFA0   | 0.04761904762 | 0.04761904762 | 0             |  | inf          | #DIV/0! |
| UDUFA1   | 0.04761904762 | 0.04761904762 | 0             |  | inf          | #DIV/0! |
| UDUFA2   | 0.09523809524 | 0.09523809524 | 0             |  | inf          | #DIV/0! |
| UDUFA3   | 0.04761904762 | 0.04761904762 | 0.05555555556 |  | 0.7          | #DIV/0! |
| UDUFA4   | 0.1904761905  | 0.1904761905  | 0.11111111111 |  | 1.529411765  | #DIV/0! |
| UDUFA5   | 0.1904761905  | 0.1904761905  | 0.11111111111 |  | 1.529411765  | #DIV/0! |
| UDUFA6   | 0             | 0             | 0.05555555556 |  | 0            | #DIV/0! |
| UDUFA7   | 0.04761904762 | 0.04761904762 | 0             |  | inf          | #DIV/0! |
| UDUFB10  | 0.09523809524 | 0.09523809524 | 0.22222222222 |  | 0.2894736842 | #DIV/0! |
| NDUFB20  | 0.04761904762 | 0.04761904762 | 0.05555555556 |  | 0.7          | #DIV/0! |
| UDUFB2-A | 0.04761904762 | 0.04761904762 | 0.05555555556 |  | 0.7          | #DIV/0! |
| NDUFB3   | 0             | 0             | 0.05555555556 |  | 0            | #DIV/0! |
| NDUFB4   | 0.09523809524 | 0.09523809524 | 0.05555555556 |  | 1.473684211  | #DIV/0! |
| NDUFB5   | 0.1904761905  | 0.1904761905  | 0.05555555556 |  | 3.294117647  | #DIV/0! |
| NDUFB6   | 0.09523809524 | 0.09523809524 | 0.05555555556 |  | 1.473684211  | #DIV/0! |
| NDUFB7   | 0.1428571429  | 0.1428571429  | 0.11111111111 |  | 1.083333333  | #DIV/0! |
| NDUFB8   | 0.1428571429  | 0.1428571429  | 0             |  | inf          | #DIV/0! |
| NDUFB9   | 0.1428571429  | 0.1428571429  | 0.11111111111 |  | 1.083333333  | #DIV/0! |
| NDUFC10  | 0.04761904762 | 0.04761904762 | 0.05555555556 |  | 0.7          | #DIV/0! |
| NDUFS1   | 0             | 0             | 0.05555555556 |  | 0            | #DIV/0! |
| NDUFS2   | 0.1428571429  | 0.1428571429  | 0             |  | inf          | #DIV/0! |
| NDUFS3   | 0             | 0             | 0.05555555556 |  | 0            | #DIV/0! |
| NDUFS4   | 0.04761904762 | 0.04761904762 | 0.05555555556 |  | 0.7          | #DIV/0! |
| NDUFS5   | 0.04761904762 | 0.04761904762 | 0.05555555556 |  | 0.7          | #DIV/0! |
| NDUFS6   | 0             | 0             | 0.11111111111 |  | 0            | #DIV/0! |
| NDUFS7   | 0.09523809524 | 0.09523809524 | 0.11111111111 |  | 0.6842105263 | #DIV/0! |
| NDUFV20  | 0.09523809524 | 0.09523809524 | 0             |  | inf          | #DIV/0! |
| UDUFV2-A | 0.09523809524 | 0.09523809524 | 0             |  | inf          | #DIV/0! |
| NDUFV30  | 0.04761904762 | 0.04761904762 | 0.16666666667 |  | 0.2          | #DIV/0! |
| NEB      | 0             | 0             | 0.05555555556 |  | 0            | #DIV/0! |
| NEBL     | 0.09523809524 | 0.09523809524 | 0.11111111111 |  | 0.6842105263 | #DIV/0! |
| EBL-AS   | 0.09523809524 | 0.09523809524 | 0.11111111111 |  | 0.6842105263 | #DIV/0! |
| NECAB1   | 0.1904761905  | 0.1904761905  | 0.11111111111 |  | 1.529411765  | #DIV/0! |
| NECAB2   | 0.04761904762 | 0.04761904762 | 0             |  | inf          | #DIV/0! |
| NECAB3   | 0.09523809524 | 0.09523809524 | 0.11111111111 |  | 0.6842105263 | #DIV/0! |
| NECAP1   | 0.04761904762 | 0.04761904762 | 0.11111111111 |  | 0.325        | #DIV/0! |
| NECAP2   | 0.04761904762 | 0.04761904762 | 0.11111111111 |  | 0.325        | #DIV/0! |
| NECTIN0  | 0.09523809524 | 0.09523809524 | 0.11111111111 |  | 0.6842105263 | #DIV/0! |
| NECTIN0  | 0.09523809524 | 0.09523809524 | 0.05555555556 |  | 1.473684211  | #DIV/0! |
| CTIN3-A  | 0.09523809524 | 0.09523809524 | 0.05555555556 |  | 1.473684211  | #DIV/0! |
| NECTIN1  | 0.1428571429  | 0.1428571429  | 0             |  | inf          | #DIV/0! |
| NEDD1    | 0.04761904762 | 0.04761904762 | 0.05555555556 |  | 0.7          | #DIV/0! |
| NEDD4    | 0.04761904762 | 0.04761904762 | 0.05555555556 |  | 0.7          | #DIV/0! |
| NEDD4L   | 0.09523809524 | 0.09523809524 | 0             |  | inf          | #DIV/0! |
| NEDD9    | 0.04761904762 | 0.04761904762 | 0             |  | inf          | #DIV/0! |
| NEFH     | 0.04761904762 | 0.04761904762 | 0.11111111111 |  | 0.325        | #DIV/0! |
| NEFL     | 0.04761904762 | 0.04761904762 | 0.11111111111 |  | 0.325        | #DIV/0! |
| NEFM     | 0.04761904762 | 0.04761904762 | 0.11111111111 |  | 0.325        | #DIV/0! |
| NEGR1    | 0.04761904762 | 0.04761904762 | 0.05555555556 |  | 0.7          | #DIV/0! |

|         |               |               |               |  |              |         |
|---------|---------------|---------------|---------------|--|--------------|---------|
| EGR1-IT | 0.04761904762 | 0.04761904762 | 0.05555555556 |  | 0.7          | #DIV/0! |
| NEIL1   | 0.04761904762 | 0.04761904762 | 0.05555555556 |  | 0.7          | #DIV/0! |
| NEIL2   | 0.09523809524 | 0.09523809524 | 0.11111111111 |  | 0.6842105263 | #DIV/0! |
| NEIL3   | 0             | 0             | 0.05555555556 |  | 0            | #DIV/0! |
| NEK1    | 0             | 0             | 0.05555555556 |  | 0            | #DIV/0! |
| NEK10   | 0.04761904762 | 0.04761904762 | 0             |  | inf          | #DIV/0! |
| NEK11   | 0.09523809524 | 0.09523809524 | 0.05555555556 |  | 1.473684211  | #DIV/0! |
| NEK2    | 0.1428571429  | 0.1428571429  | 0             |  | inf          | #DIV/0! |
| NEK4    | 0.04761904762 | 0.04761904762 | 0             |  | inf          | #DIV/0! |
| NEK6    | 0.09523809524 | 0.09523809524 | 0.05555555556 |  | 1.473684211  | #DIV/0! |
| NEK7    | 0.1428571429  | 0.1428571429  | 0.11111111111 |  | 1.083333333  | #DIV/0! |
| NEK8    | 0.04761904762 | 0.04761904762 | 0.05555555556 |  | 0.7          | #DIV/0! |
| NELFA   | 0.04761904762 | 0.04761904762 | 0             |  | inf          | #DIV/0! |
| NELFB   | 0.1428571429  | 0.1428571429  | 0.05555555556 |  | 2.333333333  | #DIV/0! |
| NELFCI  | 0.1428571429  | 0.1428571429  | 0.22222222222 |  | 0.4583333333 | #DIV/0! |
| NELFE   | 0.04761904762 | 0.04761904762 | 0             |  | inf          | #DIV/0! |
| NELL2   | 0.04761904762 | 0.04761904762 | 0.05555555556 |  | 0.7          | #DIV/0! |
| NEMF    | 0.04761904762 | 0.04761904762 | 0             |  | inf          | #DIV/0! |
| NEMP1   | 0.1428571429  | 0.1428571429  | 0.05555555556 |  | 2.333333333  | #DIV/0! |
| NEMP2   | 0             | 0             | 0.05555555556 |  | 0            | #DIV/0! |
| NENF    | 0.09523809524 | 0.09523809524 | 0             |  | inf          | #DIV/0! |
| NEO1    | 0.04761904762 | 0.04761904762 | 0.05555555556 |  | 0.7          | #DIV/0! |
| NEPRO   | 0.09523809524 | 0.09523809524 | 0.05555555556 |  | 1.473684211  | #DIV/0! |
| NES     | 0.1428571429  | 0.1428571429  | 0.11111111111 |  | 1.083333333  | #DIV/0! |
| NET1    | 0             | 0             | 0.16666666667 |  | 0            | #DIV/0! |
| NETO2   | 0.04761904762 | 0.04761904762 | 0             |  | inf          | #DIV/0! |
| NEU1    | 0.04761904762 | 0.04761904762 | 0             |  | inf          | #DIV/0! |
| NEU2    | 0             | 0             | 0.05555555556 |  | 0            | #DIV/0! |
| NEU4    | 0             | 0             | 0.05555555556 |  | 0            | #DIV/0! |
| NEURL1  | 0.1428571429  | 0.1428571429  | 0.05555555556 |  | 2.333333333  | #DIV/0! |
| URL1-A  | 0.1428571429  | 0.1428571429  | 0.05555555556 |  | 2.333333333  | #DIV/0! |
| EURL1   | 0             | 0             | 0.05555555556 |  | 0            | #DIV/0! |
| NEURL2  | 0.1428571429  | 0.1428571429  | 0.16666666667 |  | 0.6666666667 | #DIV/0! |
| NEURL3  | 0             | 0             | 0.11111111111 |  | 0            | #DIV/0! |
| NEURL4  | 0             | 0             | 0.05555555556 |  | 0            | #DIV/0! |
| EUROD   | 0             | 0             | 0.05555555556 |  | 0            | #DIV/0! |
| EUROD   | 0.09523809524 | 0.09523809524 | 0             |  | inf          | #DIV/0! |
| EUROD   | 0.04761904762 | 0.04761904762 | 0.05555555556 |  | 0.7          | #DIV/0! |
| EUROD   | 0.04761904762 | 0.04761904762 | 0.11111111111 |  | 0.325        | #DIV/0! |
| EUROG   | 0.04761904762 | 0.04761904762 | 0             |  | inf          | #DIV/0! |
| EUROG   | 0             | 0             | 0.05555555556 |  | 0            | #DIV/0! |
| EUROG   | 0.09523809524 | 0.09523809524 | 0             |  | inf          | #DIV/0! |
| NEXN    | 0.04761904762 | 0.04761904762 | 0.05555555556 |  | 0.7          | #DIV/0! |
| EXN-AS  | 0.04761904762 | 0.04761904762 | 0.05555555556 |  | 0.7          | #DIV/0! |
| NF1     | 0             | 0             | 0             |  |              | #DIV/0! |
| NF1P2   | 0.2857142857  | 0.2857142857  | 0.11111111111 |  | 2.6          | #DIV/0! |
| NF2     | 0.04761904762 | 0.04761904762 | 0.11111111111 |  | 0.325        | #DIV/0! |
| NFAM1   | 0             | 0             | 0.16666666667 |  | 0            | #DIV/0! |
| NFASC   | 0.2380952381  | 0.2380952381  | 0             |  | inf          | #DIV/0! |
| NFAT5   | 0.1428571429  | 0.1428571429  | 0.05555555556 |  | 2.333333333  | #DIV/0! |
| NFATC   | 0.04761904762 | 0.04761904762 | 0.05555555556 |  | 0.7          | #DIV/0! |

|        |               |               |              |  |              |         |
|--------|---------------|---------------|--------------|--|--------------|---------|
| NFATC2 | 0.09523809524 | 0.09523809524 | 0.1666666667 |  | 0.4210526316 | #DIV/0! |
| FATC2  | 0.04761904762 | 0.04761904762 | 0            |  | inf          | #DIV/0! |
| NFATC3 | 0.1428571429  | 0.1428571429  | 0.0555555556 |  | 2.333333333  | #DIV/0! |
| NFE2   | 0.04761904762 | 0.04761904762 | 0.0555555556 |  | 0.7          | #DIV/0! |
| NFE2L1 | 0.1428571429  | 0.1428571429  | 0            |  | inf          | #DIV/0! |
| NFE2L2 | 0             | 0             | 0.1111111111 |  | 0            | #DIV/0! |
| NFE2L3 | 0.04761904762 | 0.04761904762 | 0.2222222222 |  | 0.1375       | #DIV/0! |
| NFE4   | 0.04761904762 | 0.04761904762 | 0.0555555556 |  | 0.7          | #DIV/0! |
| NFIA   | 0.04761904762 | 0.04761904762 | 0.1111111111 |  | 0.325        | #DIV/0! |
| FIA-AS | 0.04761904762 | 0.04761904762 | 0.1111111111 |  | 0.325        | #DIV/0! |
| FIA-AS | 0.04761904762 | 0.04761904762 | 0.1111111111 |  | 0.325        | #DIV/0! |
| NFIB   | 0.1428571429  | 0.1428571429  | 0.0555555556 |  | 2.333333333  | #DIV/0! |
| NFIC   | 0.09523809524 | 0.09523809524 | 0.0555555556 |  | 1.473684211  | #DIV/0! |
| NFIL3  | 0.04761904762 | 0.04761904762 | 0.0555555556 |  | 0.7          | #DIV/0! |
| NFIX   | 0.1428571429  | 0.1428571429  | 0.1111111111 |  | 1.083333333  | #DIV/0! |
| NFKB1  | 0             | 0             | 0.0555555556 |  | 0            | #DIV/0! |
| NFKB2  | 0.1428571429  | 0.1428571429  | 0.0555555556 |  | 2.333333333  | #DIV/0! |
| NFKBIA | 0.09523809524 | 0.09523809524 | 0            |  | inf          | #DIV/0! |
| NFKBIB | 0.04761904762 | 0.04761904762 | 0.0555555556 |  | 0.7          | #DIV/0! |
| NFKBID | 0.04761904762 | 0.04761904762 | 0.0555555556 |  | 0.7          | #DIV/0! |
| NFKBIE | 0.04761904762 | 0.04761904762 | 0.0555555556 |  | 0.7          | #DIV/0! |
| NFKBIL | 0.04761904762 | 0.04761904762 | 0            |  | inf          | #DIV/0! |
| NFKBIZ | 0.09523809524 | 0.09523809524 | 0.0555555556 |  | 1.473684211  | #DIV/0! |
| NFS1   | 0.09523809524 | 0.09523809524 | 0.1111111111 |  | 0.6842105263 | #DIV/0! |
| NFU1   | 0             | 0             | 0.0555555556 |  | 0            | #DIV/0! |
| NFX1   | 0.09523809524 | 0.09523809524 | 0.0555555556 |  | 1.473684211  | #DIV/0! |
| NFXL1  | 0.04761904762 | 0.04761904762 | 0.1111111111 |  | 0.325        | #DIV/0! |
| NFYA   | 0             | 0             | 0.0555555556 |  | 0            | #DIV/0! |
| NFYB   | 0.04761904762 | 0.04761904762 | 0.0555555556 |  | 0.7          | #DIV/0! |
| NFYC   | 0.04761904762 | 0.04761904762 | 0.0555555556 |  | 0.7          | #DIV/0! |
| FYC-AS | 0.04761904762 | 0.04761904762 | 0.0555555556 |  | 0.7          | #DIV/0! |
| NGDN   | 0             | 0             | 0.0555555556 |  | 0            | #DIV/0! |
| NGEF   | 0             | 0             | 0.0555555556 |  | 0            | #DIV/0! |
| NGF    | 0.04761904762 | 0.04761904762 | 0.0555555556 |  | 0.7          | #DIV/0! |
| NGF-AS | 0.04761904762 | 0.04761904762 | 0.0555555556 |  | 0.7          | #DIV/0! |
| NGFR   | 0.09523809524 | 0.09523809524 | 0            |  | inf          | #DIV/0! |
| NGRN   | 0.04761904762 | 0.04761904762 | 0.0555555556 |  | 0.7          | #DIV/0! |
| NHEJ1  | 0             | 0             | 0.0555555556 |  | 0            | #DIV/0! |
| NHLH2  | 0.04761904762 | 0.04761904762 | 0.0555555556 |  | 0.7          | #DIV/0! |
| NHLRC2 | 0.1428571429  | 0.1428571429  | 0.0555555556 |  | 2.333333333  | #DIV/0! |
| NHLRC4 | 0.04761904762 | 0.04761904762 | 0.2222222222 |  | 0.1375       | #DIV/0! |
| NHP2   | 0.09523809524 | 0.09523809524 | 0.0555555556 |  | 1.473684211  | #DIV/0! |
| NICN1  | 0.1428571429  | 0.1428571429  | 0            |  | inf          | #DIV/0! |
| NID1   | 0.1428571429  | 0.1428571429  | 0.0555555556 |  | 2.333333333  | #DIV/0! |
| NID2   | 0.04761904762 | 0.04761904762 | 0            |  | inf          | #DIV/0! |
| NIF3L1 | 0             | 0             | 0.0555555556 |  | 0            | #DIV/0! |
| NIFK   | 0             | 0             | 0.0555555556 |  | 0            | #DIV/0! |
| IFK-AS | 0             | 0             | 0.0555555556 |  | 0            | #DIV/0! |
| NIM1K  | 0.04761904762 | 0.04761904762 | 0.0555555556 |  | 0.7          | #DIV/0! |
| NIN    | 0.04761904762 | 0.04761904762 | 0            |  | inf          | #DIV/0! |
| NINJ1  | 0.04761904762 | 0.04761904762 | 0.0555555556 |  | 0.7          | #DIV/0! |

|          |               |               |               |  |              |         |
|----------|---------------|---------------|---------------|--|--------------|---------|
| NINJ2    | 0.04761904762 | 0.04761904762 | 0.1111111111  |  | 0.325        | #DIV/0! |
| NINL     | 0.1904761905  | 0.1904761905  | 0.05555555556 |  | 3.294117647  | #DIV/0! |
| NIP7     | 0.1428571429  | 0.1428571429  | 0.05555555556 |  | 2.333333333  | #DIV/0! |
| NIPA1    | 0.09523809524 | 0.09523809524 | 0             |  | inf          | #DIV/0! |
| NIPA2    | 0.09523809524 | 0.09523809524 | 0             |  | inf          | #DIV/0! |
| NIPAL1   | 0.04761904762 | 0.04761904762 | 0.1111111111  |  | 0.325        | #DIV/0! |
| NIPAL2   | 0.1904761905  | 0.1904761905  | 0.1111111111  |  | 1.529411765  | #DIV/0! |
| NIPAL3   | 0.04761904762 | 0.04761904762 | 0.1111111111  |  | 0.325        | #DIV/0! |
| NIPAL4   | 0.04761904762 | 0.04761904762 | 0.05555555556 |  | 0.7          | #DIV/0! |
| NIPBL    | 0.04761904762 | 0.04761904762 | 0.05555555556 |  | 0.7          | #DIV/0! |
| IPBL-D   | 0.04761904762 | 0.04761904762 | 0.05555555556 |  | 0.7          | #DIV/0! |
| IPSNAP   | 0.04761904762 | 0.04761904762 | 0.1111111111  |  | 0.325        | #DIV/0! |
| IPSNAP   | 0.3333333333  | 0.3333333333  | 0.2222222222  |  | 1.375        | #DIV/0! |
| PSNAP3   | 0.04761904762 | 0.04761904762 | 0.05555555556 |  | 0.7          | #DIV/0! |
| PSNAP3   | 0.04761904762 | 0.04761904762 | 0.05555555556 |  | 0.7          | #DIV/0! |
| NISCH    | 0.04761904762 | 0.04761904762 | 0             |  | inf          | #DIV/0! |
| NIT1     | 0.1428571429  | 0.1428571429  | 0             |  | inf          | #DIV/0! |
| NIT2     | 0.09523809524 | 0.09523809524 | 0.05555555556 |  | 1.473684211  | #DIV/0! |
| NKAIN1   | 0.04761904762 | 0.04761904762 | 0.1111111111  |  | 0.325        | #DIV/0! |
| NKAIN3   | 0.1428571429  | 0.1428571429  | 0.1666666667  |  | 0.6666666667 | #DIV/0! |
| NKAIN3-I | 0.1428571429  | 0.1428571429  | 0.1666666667  |  | 0.6666666667 | #DIV/0! |
| NKAIN4   | 0.1428571429  | 0.1428571429  | 0.2222222222  |  | 0.4583333333 | #DIV/0! |
| NKD1     | 0.04761904762 | 0.04761904762 | 0             |  | inf          | #DIV/0! |
| NKD2     | 0             | 0             | 0.05555555556 |  | 0            | #DIV/0! |
| NKILA    | 0.1428571429  | 0.1428571429  | 0.2222222222  |  | 0.4583333333 | #DIV/0! |
| NKIRAS   | 0.04761904762 | 0.04761904762 | 0             |  | inf          | #DIV/0! |
| NKIRAS   | 0.09523809524 | 0.09523809524 | 0             |  | inf          | #DIV/0! |
| NKPD1    | 0.09523809524 | 0.09523809524 | 0.1111111111  |  | 0.6842105263 | #DIV/0! |
| NKTR     | 0.04761904762 | 0.04761904762 | 0             |  | inf          | #DIV/0! |
| NKX1-1   | 0.04761904762 | 0.04761904762 | 0             |  | inf          | #DIV/0! |
| NKX1-2   | 0.2380952381  | 0.2380952381  | 0.05555555556 |  | 4.375        | #DIV/0! |
| NKX2-2   | 0.1904761905  | 0.1904761905  | 0.05555555556 |  | 3.294117647  | #DIV/0! |
| NKX2-3   | 0.1428571429  | 0.1428571429  | 0             |  | inf          | #DIV/0! |
| NKX2-4   | 0.1904761905  | 0.1904761905  | 0.05555555556 |  | 3.294117647  | #DIV/0! |
| NKX2-5   | 0             | 0             | 0.05555555556 |  | 0            | #DIV/0! |
| NKX2-6   | 0.04761904762 | 0.04761904762 | 0.1111111111  |  | 0.325        | #DIV/0! |
| NKX3-1   | 0.04761904762 | 0.04761904762 | 0.1111111111  |  | 0.325        | #DIV/0! |
| NKX3-2   | 0             | 0             | 0             |  |              | #DIV/0! |
| NKX6-1   | 0             | 0             | 0.05555555556 |  | 0            | #DIV/0! |
| NKX6-2   | 0.2380952381  | 0.2380952381  | 0             |  | inf          | #DIV/0! |
| NKX6-3   | 0.09523809524 | 0.09523809524 | 0.1666666667  |  | 0.4210526316 | #DIV/0! |
| NLGN1    | 0.1904761905  | 0.1904761905  | 0.05555555556 |  | 3.294117647  | #DIV/0! |
| NLGN1-A  | 0.1904761905  | 0.1904761905  | 0.05555555556 |  | 3.294117647  | #DIV/0! |
| NLGN2    | 0             | 0             | 0.05555555556 |  | 0            | #DIV/0! |
| NLK      | 0.04761904762 | 0.04761904762 | 0.05555555556 |  | 0.7          | #DIV/0! |
| NLN      | 0.04761904762 | 0.04761904762 | 0             |  | inf          | #DIV/0! |
| NLRC3    | 0.04761904762 | 0.04761904762 | 0.1111111111  |  | 0.325        | #DIV/0! |
| NLRC4    | 0.1428571429  | 0.1428571429  | 0             |  | inf          | #DIV/0! |
| NLRC5    | 0.04761904762 | 0.04761904762 | 0             |  | inf          | #DIV/0! |
| NLRP1    | 0             | 0             | 0.05555555556 |  | 0            | #DIV/0! |
| NLRP11   | 0.1428571429  | 0.1428571429  | 0.05555555556 |  | 2.333333333  | #DIV/0! |

|        |               |               |               |  |              |         |
|--------|---------------|---------------|---------------|--|--------------|---------|
| NLRP12 | 0.09523809524 | 0.09523809524 | 0.05555555556 |  | 1.473684211  | #DIV/0! |
| NLRP13 | 0.1428571429  | 0.1428571429  | 0.05555555556 |  | 2.333333333  | #DIV/0! |
| NLRP14 | 0.04761904762 | 0.04761904762 | 0             |  | inf          | #DIV/0! |
| NLRP2  | 0.09523809524 | 0.09523809524 | 0.05555555556 |  | 1.473684211  | #DIV/0! |
| NLRP3  | 0.1428571429  | 0.1428571429  | 0             |  | inf          | #DIV/0! |
| NLRP4  | 0.1428571429  | 0.1428571429  | 0.05555555556 |  | 2.333333333  | #DIV/0! |
| NLRP5  | 0.1428571429  | 0.1428571429  | 0.05555555556 |  | 2.333333333  | #DIV/0! |
| NLRP6  | 0.04761904762 | 0.04761904762 | 0             |  | inf          | #DIV/0! |
| NLRP7  | 0.09523809524 | 0.09523809524 | 0.05555555556 |  | 1.473684211  | #DIV/0! |
| NLRP8  | 0.1428571429  | 0.1428571429  | 0.05555555556 |  | 2.333333333  | #DIV/0! |
| NLRP9  | 0.1428571429  | 0.1428571429  | 0.05555555556 |  | 2.333333333  | #DIV/0! |
| NMB    | 0.04761904762 | 0.04761904762 | 0.05555555556 |  | 0.7          | #DIV/0! |
| NMD3   | 0.1428571429  | 0.1428571429  | 0.05555555556 |  | 2.333333333  | #DIV/0! |
| NME1   | 0.04761904762 | 0.04761904762 | 0             |  | inf          | #DIV/0! |
| IE1-NM | 0.04761904762 | 0.04761904762 | 0             |  | inf          | #DIV/0! |
| NME2   | 0.04761904762 | 0.04761904762 | 0             |  | inf          | #DIV/0! |
| NME3   | 0.09523809524 | 0.09523809524 | 0.2222222222  |  | 0.2894736842 | #DIV/0! |
| NME4   | 0.04761904762 | 0.04761904762 | 0.2222222222  |  | 0.1375       | #DIV/0! |
| NME5   | 0.04761904762 | 0.04761904762 | 0             |  | inf          | #DIV/0! |
| NME6   | 0.09523809524 | 0.09523809524 | 0             |  | inf          | #DIV/0! |
| NME7   | 0.1428571429  | 0.1428571429  | 0             |  | inf          | #DIV/0! |
| NME8   | 0.04761904762 | 0.04761904762 | 0.2222222222  |  | 0.1375       | #DIV/0! |
| NME9   | 0.1428571429  | 0.1428571429  | 0.05555555556 |  | 2.333333333  | #DIV/0! |
| NMI    | 0             | 0             | 0.05555555556 |  | 0            | #DIV/0! |
| NMNAT  | 0             | 0             | 0.1111111111  |  | 0            | #DIV/0! |
| NMNAT  | 0.1428571429  | 0.1428571429  | 0             |  | inf          | #DIV/0! |
| NMNAT  | 0.1428571429  | 0.1428571429  | 0.05555555556 |  | 2.333333333  | #DIV/0! |
| NMRAL  | 0.04761904762 | 0.04761904762 | 0             |  | inf          | #DIV/0! |
| MRAL2  | 0.09523809524 | 0.09523809524 | 0.05555555556 |  | 1.473684211  | #DIV/0! |
| NMRK1  | 0             | 0             | 0.05555555556 |  | 0            | #DIV/0! |
| NMRK2  | 0.09523809524 | 0.09523809524 | 0.05555555556 |  | 1.473684211  | #DIV/0! |
| NMS    | 0             | 0             | 0.05555555556 |  | 0            | #DIV/0! |
| NMT1   | 0.1428571429  | 0.1428571429  | 0             |  | inf          | #DIV/0! |
| NMT2   | 0.09523809524 | 0.09523809524 | 0.1111111111  |  | 0.6842105263 | #DIV/0! |
| NMU    | 0.1904761905  | 0.1904761905  | 0.05555555556 |  | 3.294117647  | #DIV/0! |
| NMUR1  | 0             | 0             | 0.05555555556 |  | 0            | #DIV/0! |
| NNAT   | 0.09523809524 | 0.09523809524 | 0.1666666667  |  | 0.4210526316 | #DIV/0! |
| NNT    | 0.04761904762 | 0.04761904762 | 0.05555555556 |  | 0.7          | #DIV/0! |
| NNT-AS | 0.04761904762 | 0.04761904762 | 0.05555555556 |  | 0.7          | #DIV/0! |
| NOA1   | 0.1904761905  | 0.1904761905  | 0.05555555556 |  | 3.294117647  | #DIV/0! |
| NOB1   | 0.1428571429  | 0.1428571429  | 0.05555555556 |  | 2.333333333  | #DIV/0! |
| NOBOX  | 0.09523809524 | 0.09523809524 | 0.05555555556 |  | 1.473684211  | #DIV/0! |
| NOC2L  | 0             | 0             | 0.1111111111  |  | 0            | #DIV/0! |
| OC2LP  | 0             | 0             | 0.05555555556 |  | 0            | #DIV/0! |
| NOC3L  | 0.1428571429  | 0.1428571429  | 0             |  | inf          | #DIV/0! |
| NOC4L  | 0.09523809524 | 0.09523809524 | 0.05555555556 |  | 1.473684211  | #DIV/0! |
| NOCT   | 0.04761904762 | 0.04761904762 | 0.05555555556 |  | 0.7          | #DIV/0! |
| NOD1   | 0.04761904762 | 0.04761904762 | 0.1666666667  |  | 0.2          | #DIV/0! |
| NOD2   | 0.04761904762 | 0.04761904762 | 0             |  | inf          | #DIV/0! |
| NODAL  | 0.09523809524 | 0.09523809524 | 0             |  | inf          | #DIV/0! |
| NOG    | 0.09523809524 | 0.09523809524 | 0             |  | inf          | #DIV/0! |

|         |               |               |               |  |              |         |
|---------|---------------|---------------|---------------|--|--------------|---------|
| NOL10   | 0             | 0             | 0.05555555556 |  | 0            | #DIV/0! |
| NOL11   | 0             | 0             | 0             |  |              | #DIV/0! |
| NOL12   | 0             | 0             | 0.1111111111  |  | 0            | #DIV/0! |
| NOL3    | 0.1428571429  | 0.1428571429  | 0.05555555556 |  | 2.333333333  | #DIV/0! |
| NOL4    | 0.09523809524 | 0.09523809524 | 0             |  | inf          | #DIV/0! |
| NOL4L   | 0.09523809524 | 0.09523809524 | 0.1111111111  |  | 0.6842105263 | #DIV/0! |
| OL4L-D  | 0.09523809524 | 0.09523809524 | 0.1111111111  |  | 0.6842105263 | #DIV/0! |
| NOL6    | 0.09523809524 | 0.09523809524 | 0.05555555556 |  | 1.473684211  | #DIV/0! |
| NOL8    | 0.04761904762 | 0.04761904762 | 0.05555555556 |  | 0.7          | #DIV/0! |
| NOL9    | 0             | 0             | 0.05555555556 |  | 0            | #DIV/0! |
| NOLC1   | 0.1428571429  | 0.1428571429  | 0.05555555556 |  | 2.333333333  | #DIV/0! |
| NOM1    | 0.1428571429  | 0.1428571429  | 0.05555555556 |  | 2.333333333  | #DIV/0! |
| NOMO1   | 0.04761904762 | 0.04761904762 | 0             |  | inf          | #DIV/0! |
| NOMO2   | 0.09523809524 | 0.09523809524 | 0             |  | inf          | #DIV/0! |
| NOMO3   | 0.04761904762 | 0.04761904762 | 0             |  | inf          | #DIV/0! |
| NOPI4   | 0.04761904762 | 0.04761904762 | 0             |  | inf          | #DIV/0! |
| OP14-AS | 0.04761904762 | 0.04761904762 | 0             |  | inf          | #DIV/0! |
| NOP16   | 0.09523809524 | 0.09523809524 | 0.05555555556 |  | 1.473684211  | #DIV/0! |
| NOP2    | 0.04761904762 | 0.04761904762 | 0.1111111111  |  | 0.325        | #DIV/0! |
| NOP53   | 0.09523809524 | 0.09523809524 | 0.1111111111  |  | 0.6842105263 | #DIV/0! |
| OP53-AS | 0.09523809524 | 0.09523809524 | 0.1111111111  |  | 0.6842105263 | #DIV/0! |
| NOP56   | 0.1904761905  | 0.1904761905  | 0.05555555556 |  | 3.294117647  | #DIV/0! |
| NOP58   | 0.09523809524 | 0.09523809524 | 0.05555555556 |  | 1.473684211  | #DIV/0! |
| NORAD   | 0.09523809524 | 0.09523809524 | 0.1111111111  |  | 0.6842105263 | #DIV/0! |
| NOS1    | 0             | 0             | 0.05555555556 |  | 0            | #DIV/0! |
| NOS1AP  | 0.1428571429  | 0.1428571429  | 0             |  | inf          | #DIV/0! |
| NOS2    | 0.04761904762 | 0.04761904762 | 0.05555555556 |  | 0.7          | #DIV/0! |
| NOS2P3  | 0.09523809524 | 0.09523809524 | 0.05555555556 |  | 1.473684211  | #DIV/0! |
| NOS3    | 0.09523809524 | 0.09523809524 | 0.05555555556 |  | 1.473684211  | #DIV/0! |
| NOSIP   | 0.09523809524 | 0.09523809524 | 0.1111111111  |  | 0.6842105263 | #DIV/0! |
| OSTRI   | 0.04761904762 | 0.04761904762 | 0.05555555556 |  | 0.7          | #DIV/0! |
| NOTCH1  | 0.1428571429  | 0.1428571429  | 0.05555555556 |  | 2.333333333  | #DIV/0! |
| NOTCH2  | 0.04761904762 | 0.04761904762 | 0.1111111111  |  | 0.325        | #DIV/0! |
| TCH2N   | 0.1428571429  | 0.1428571429  | 0.05555555556 |  | 2.333333333  | #DIV/0! |
| TCH2N   | 0.1428571429  | 0.1428571429  | 0.05555555556 |  | 2.333333333  | #DIV/0! |
| TCH2N   | 0.1428571429  | 0.1428571429  | 0.05555555556 |  | 2.333333333  | #DIV/0! |
| TCH2N   | 0.1428571429  | 0.1428571429  | 0.1111111111  |  | 1.083333333  | #DIV/0! |
| NOTCH3  | 0.1428571429  | 0.1428571429  | 0.1111111111  |  | 1.083333333  | #DIV/0! |
| NOTCH4  | 0.04761904762 | 0.04761904762 | 0             |  | inf          | #DIV/0! |
| NOTO    | 0             | 0             | 0.05555555556 |  | 0            | #DIV/0! |
| NOTUM   | 0.04761904762 | 0.04761904762 | 0             |  | inf          | #DIV/0! |
| NOX5    | 0.04761904762 | 0.04761904762 | 0.05555555556 |  | 0.7          | #DIV/0! |
| NOXA1   | 0.09523809524 | 0.09523809524 | 0             |  | inf          | #DIV/0! |
| NOXO1   | 0.09523809524 | 0.09523809524 | 0.2222222222  |  | 0.2894736842 | #DIV/0! |
| NPAPIL  | 0.04761904762 | 0.04761904762 | 0             |  | inf          | #DIV/0! |
| NPAS1   | 0.09523809524 | 0.09523809524 | 0.1111111111  |  | 0.6842105263 | #DIV/0! |
| NPAS2   | 0             | 0             | 0.05555555556 |  | 0            | #DIV/0! |
| NPB     | 0.04761904762 | 0.04761904762 | 0             |  | inf          | #DIV/0! |
| NPBWR   | 0.09523809524 | 0.09523809524 | 0.1111111111  |  | 0.6842105263 | #DIV/0! |
| NPBWR   | 0.1428571429  | 0.1428571429  | 0.2222222222  |  | 0.4583333333 | #DIV/0! |
| NPC1    | 0.04761904762 | 0.04761904762 | 0.05555555556 |  | 0.7          | #DIV/0! |

|         |               |               |               |  |              |         |
|---------|---------------|---------------|---------------|--|--------------|---------|
| NPC1L1  | 0.04761904762 | 0.04761904762 | 0.2222222222  |  | 0.1375       | #DIV/0! |
| NPDC1   | 0.1428571429  | 0.1428571429  | 0.05555555556 |  | 2.333333333  | #DIV/0! |
| NPEPL1  | 0.1428571429  | 0.1428571429  | 0.2222222222  |  | 0.4583333333 | #DIV/0! |
| NPEPPS  | 0.1428571429  | 0.1428571429  | 0             |  | inf          | #DIV/0! |
| NPFF    | 0.04761904762 | 0.04761904762 | 0.05555555556 |  | 0.7          | #DIV/0! |
| NPFFR1  | 0.09523809524 | 0.09523809524 | 0             |  | inf          | #DIV/0! |
| NPFFR2  | 0.04761904762 | 0.04761904762 | 0.05555555556 |  | 0.7          | #DIV/0! |
| NPHP1   | 0             | 0             | 0.05555555556 |  | 0            | #DIV/0! |
| NPHP3   | 0.1428571429  | 0.1428571429  | 0.05555555556 |  | 2.333333333  | #DIV/0! |
| P3-ACA  | 0.1428571429  | 0.1428571429  | 0.05555555556 |  | 2.333333333  | #DIV/0! |
| PHP3-AS | 0.1428571429  | 0.1428571429  | 0.05555555556 |  | 2.333333333  | #DIV/0! |
| NPHP4   | 0             | 0             | 0.05555555556 |  | 0            | #DIV/0! |
| NPHS1   | 0.04761904762 | 0.04761904762 | 0.05555555556 |  | 0.7          | #DIV/0! |
| NPHS2   | 0.1428571429  | 0.1428571429  | 0             |  | inf          | #DIV/0! |
| NPIPA1  | 0.04761904762 | 0.04761904762 | 0             |  | inf          | #DIV/0! |
| NPIPA2  | 0.04761904762 | 0.04761904762 | 0             |  | inf          | #DIV/0! |
| NPIPA3  | 0.04761904762 | 0.04761904762 | 0             |  | inf          | #DIV/0! |
| NPIPA5  | 0.04761904762 | 0.04761904762 | 0             |  | inf          | #DIV/0! |
| NPIPA7  | 0.09523809524 | 0.09523809524 | 0             |  | inf          | #DIV/0! |
| NPIPA8  | 0.09523809524 | 0.09523809524 | 0             |  | inf          | #DIV/0! |
| NPIPB1  | 0.04761904762 | 0.04761904762 | 0             |  | inf          | #DIV/0! |
| NPIPB2  | 0.04761904762 | 0.04761904762 | 0             |  | inf          | #DIV/0! |
| NPIPB3  | 0.04761904762 | 0.04761904762 | 0             |  | inf          | #DIV/0! |
| NPIPB4  | 0.04761904762 | 0.04761904762 | 0             |  | inf          | #DIV/0! |
| NPIPB5  | 0.04761904762 | 0.04761904762 | 0             |  | inf          | #DIV/0! |
| NPIPB6  | 0.04761904762 | 0.04761904762 | 0             |  | inf          | #DIV/0! |
| NPIPB8  | 0.04761904762 | 0.04761904762 | 0             |  | inf          | #DIV/0! |
| NPIPB9  | 0.04761904762 | 0.04761904762 | 0             |  | inf          | #DIV/0! |
| NPL     | 0.1428571429  | 0.1428571429  | 0             |  | inf          | #DIV/0! |
| NPLOC4  | 0.04761904762 | 0.04761904762 | 0             |  | inf          | #DIV/0! |
| NPM1    | 0             | 0             | 0.05555555556 |  | 0            | #DIV/0! |
| NPM2    | 0.09523809524 | 0.09523809524 | 0.1111111111  |  | 0.6842105263 | #DIV/0! |
| NPM3    | 0.1428571429  | 0.1428571429  | 0             |  | inf          | #DIV/0! |
| NPNT    | 0             | 0             | 0.05555555556 |  | 0            | #DIV/0! |
| NPPA    | 0.04761904762 | 0.04761904762 | 0.1111111111  |  | 0.325        | #DIV/0! |
| PPA-AS  | 0.04761904762 | 0.04761904762 | 0.1111111111  |  | 0.325        | #DIV/0! |
| NPPB    | 0.04761904762 | 0.04761904762 | 0.1111111111  |  | 0.325        | #DIV/0! |
| NPPC    | 0             | 0             | 0.05555555556 |  | 0            | #DIV/0! |
| NPRI    | 0.1904761905  | 0.1904761905  | 0.05555555556 |  | 3.294117647  | #DIV/0! |
| NPR2    | 0.09523809524 | 0.09523809524 | 0.05555555556 |  | 1.473684211  | #DIV/0! |
| NPR3    | 0.04761904762 | 0.04761904762 | 0.05555555556 |  | 0.7          | #DIV/0! |
| NPRL2   | 0.09523809524 | 0.09523809524 | 0             |  | inf          | #DIV/0! |
| NPRL3   | 0.04761904762 | 0.04761904762 | 0.2222222222  |  | 0.1375       | #DIV/0! |
| NPS     | 0.2380952381  | 0.2380952381  | 0.05555555556 |  | 4.375        | #DIV/0! |
| NPSR1   | 0.04761904762 | 0.04761904762 | 0.1666666667  |  | 0.2          | #DIV/0! |
| PSR1-AS | 0.04761904762 | 0.04761904762 | 0.1666666667  |  | 0.2          | #DIV/0! |
| NPTN    | 0.04761904762 | 0.04761904762 | 0.05555555556 |  | 0.7          | #DIV/0! |
| PTN-IT  | 0.04761904762 | 0.04761904762 | 0.05555555556 |  | 0.7          | #DIV/0! |
| NPTX1   | 0.04761904762 | 0.04761904762 | 0             |  | inf          | #DIV/0! |



|         |               |               |               |  |              |         |
|---------|---------------|---------------|---------------|--|--------------|---------|
| NPTX2   | 0.04761904762 | 0.04761904762 | 0.05555555556 |  | 0.7          | #DIV/0! |
| NPTXR   | 0.04761904762 | 0.04761904762 | 0.11111111111 |  | 0.325        | #DIV/0! |
| NPVF    | 0.04761904762 | 0.04761904762 | 0.22222222222 |  | 0.1375       | #DIV/0! |
| NPW     | 0.09523809524 | 0.09523809524 | 0.22222222222 |  | 0.2894736842 | #DIV/0! |
| NPY     | 0.04761904762 | 0.04761904762 | 0.16666666667 |  | 0.2          | #DIV/0! |
| NPY1R   | 0             | 0             | 0.05555555556 |  | 0            | #DIV/0! |
| NPY2R   | 0             | 0             | 0.05555555556 |  | 0            | #DIV/0! |
| NPY4R   | 0.1428571429  | 0.1428571429  | 0.05555555556 |  | 2.3333333333 | #DIV/0! |
| NPY4R2  | 0.1428571429  | 0.1428571429  | 0.05555555556 |  | 2.3333333333 | #DIV/0! |
| NPY5R   | 0             | 0             | 0.05555555556 |  | 0            | #DIV/0! |
| NPY6R   | 0.04761904762 | 0.04761904762 | 0             |  | inf          | #DIV/0! |
| NQO1    | 0.1428571429  | 0.1428571429  | 0.05555555556 |  | 2.3333333333 | #DIV/0! |
| NR0B2   | 0.04761904762 | 0.04761904762 | 0.11111111111 |  | 0.325        | #DIV/0! |
| NR1D1   | 0.09523809524 | 0.09523809524 | 0             |  | inf          | #DIV/0! |
| NR1D2   | 0.04761904762 | 0.04761904762 | 0             |  | inf          | #DIV/0! |
| NR1H2   | 0.09523809524 | 0.09523809524 | 0.11111111111 |  | 0.6842105263 | #DIV/0! |
| NR1H3   | 0             | 0             | 0.05555555556 |  | 0            | #DIV/0! |
| NR1H4   | 0.04761904762 | 0.04761904762 | 0.05555555556 |  | 0.7          | #DIV/0! |
| NR1I2   | 0.09523809524 | 0.09523809524 | 0.05555555556 |  | 1.473684211  | #DIV/0! |
| NR1I3   | 0.1428571429  | 0.1428571429  | 0             |  | inf          | #DIV/0! |
| NR2C1   | 0.04761904762 | 0.04761904762 | 0.05555555556 |  | 0.7          | #DIV/0! |
| NR2C2   | 0.04761904762 | 0.04761904762 | 0             |  | inf          | #DIV/0! |
| NR2C2A  | 0.1428571429  | 0.1428571429  | 0.11111111111 |  | 1.0833333333 | #DIV/0! |
| NR2E1   | 0             | 0             | 0             |  |              | #DIV/0! |
| NR2E3   | 0.04761904762 | 0.04761904762 | 0.05555555556 |  | 0.7          | #DIV/0! |
| NR2F1   | 0.04761904762 | 0.04761904762 | 0             |  | inf          | #DIV/0! |
| R2F1-AS | 0.04761904762 | 0.04761904762 | 0             |  | inf          | #DIV/0! |
| NR2F2   | 0.04761904762 | 0.04761904762 | 0.05555555556 |  | 0.7          | #DIV/0! |
| R2F2-AS | 0.04761904762 | 0.04761904762 | 0.05555555556 |  | 0.7          | #DIV/0! |
| NR2F6   | 0.1428571429  | 0.1428571429  | 0.11111111111 |  | 1.0833333333 | #DIV/0! |
| NR3C1   | 0.04761904762 | 0.04761904762 | 0             |  | inf          | #DIV/0! |
| NR3C2   | 0             | 0             | 0.05555555556 |  | 0            | #DIV/0! |
| NR4A1   | 0.04761904762 | 0.04761904762 | 0.05555555556 |  | 0.7          | #DIV/0! |
| NR4A2   | 0             | 0             | 0.05555555556 |  | 0            | #DIV/0! |
| NR4A3   | 0.04761904762 | 0.04761904762 | 0             |  | inf          | #DIV/0! |
| NR5A1   | 0.09523809524 | 0.09523809524 | 0.05555555556 |  | 1.473684211  | #DIV/0! |
| NR5A2   | 0.1428571429  | 0.1428571429  | 0             |  | inf          | #DIV/0! |
| NR6A1   | 0.09523809524 | 0.09523809524 | 0.05555555556 |  | 1.473684211  | #DIV/0! |
| NRAP    | 0.1428571429  | 0.1428571429  | 0.05555555556 |  | 2.3333333333 | #DIV/0! |
| NRARP   | 0.1428571429  | 0.1428571429  | 0.05555555556 |  | 2.3333333333 | #DIV/0! |
| NRAS    | 0.04761904762 | 0.04761904762 | 0.05555555556 |  | 0.7          | #DIV/0! |
| NRAV    | 0             | 0             | 0.11111111111 |  | 0            | #DIV/0! |
| NRBF2   | 0.09523809524 | 0.09523809524 | 0.11111111111 |  | 0.6842105263 | #DIV/0! |
| NRBP2   | 0.04761904762 | 0.04761904762 | 0.16666666667 |  | 0.2          | #DIV/0! |
| NRCAM   | 0.04761904762 | 0.04761904762 | 0.05555555556 |  | 0.7          | #DIV/0! |
| NRDC    | 0.04761904762 | 0.04761904762 | 0.05555555556 |  | 0.7          | #DIV/0! |
| NREP    | 0.04761904762 | 0.04761904762 | 0             |  | inf          | #DIV/0! |
| REP-AS  | 0.04761904762 | 0.04761904762 | 0             |  | inf          | #DIV/0! |
| NRF1    | 0.04761904762 | 0.04761904762 | 0.05555555556 |  | 0.7          | #DIV/0! |
| NRG1    | 0.04761904762 | 0.04761904762 | 0.11111111111 |  | 0.325        | #DIV/0! |
| RG1-IT  | 0.04761904762 | 0.04761904762 | 0.11111111111 |  | 0.325        | #DIV/0! |

|         |               |               |              |  |              |         |
|---------|---------------|---------------|--------------|--|--------------|---------|
| RG1-IT  | 0.04761904762 | 0.04761904762 | 0.1111111111 |  | 0.325        | #DIV/0! |
| NRG2    | 0.04761904762 | 0.04761904762 | 0            |  | inf          | #DIV/0! |
| NRG3    | 0.1428571429  | 0.1428571429  | 0            |  | inf          | #DIV/0! |
| RG3-AS  | 0.1428571429  | 0.1428571429  | 0            |  | inf          | #DIV/0! |
| NRG4    | 0.04761904762 | 0.04761904762 | 0.0555555556 |  | 0.7          | #DIV/0! |
| NRIP1   | 0.04761904762 | 0.04761904762 | 0.1111111111 |  | 0.325        | #DIV/0! |
| NRIP2   | 0.04761904762 | 0.04761904762 | 0.1666666667 |  | 0.2          | #DIV/0! |
| NRIR    | 0             | 0             | 0.0555555556 |  | 0            | #DIV/0! |
| NRN1L   | 0.1428571429  | 0.1428571429  | 0.0555555556 |  | 2.333333333  | #DIV/0! |
| NRON    | 0.09523809524 | 0.09523809524 | 0.0555555556 |  | 1.473684211  | #DIV/0! |
| NRP1    | 0.09523809524 | 0.09523809524 | 0.2222222222 |  | 0.2894736842 | #DIV/0! |
| NRP2    | 0             | 0             | 0.0555555556 |  | 0            | #DIV/0! |
| NRROS   | 0.1428571429  | 0.1428571429  | 0.0555555556 |  | 2.333333333  | #DIV/0! |
| NRSN2   | 0.1904761905  | 0.1904761905  | 0.0555555556 |  | 3.294117647  | #DIV/0! |
| RSN2-AS | 0.1904761905  | 0.1904761905  | 0.0555555556 |  | 3.294117647  | #DIV/0! |
| NRTN    | 0.1428571429  | 0.1428571429  | 0.0555555556 |  | 2.333333333  | #DIV/0! |
| NRXN1   | 0.04761904762 | 0.04761904762 | 0.0555555556 |  | 0.7          | #DIV/0! |
| NSA2    | 0.04761904762 | 0.04761904762 | 0            |  | inf          | #DIV/0! |
| NSD1    | 0.09523809524 | 0.09523809524 | 0.0555555556 |  | 1.473684211  | #DIV/0! |
| NSD2    | 0.04761904762 | 0.04761904762 | 0            |  | inf          | #DIV/0! |
| NSD3    | 0.09523809524 | 0.09523809524 | 0.1111111111 |  | 0.6842105263 | #DIV/0! |
| NSF     | 0.2380952381  | 0.2380952381  | 0            |  | inf          | #DIV/0! |
| NSFL1C  | 0.1904761905  | 0.1904761905  | 0.1111111111 |  | 1.529411765  | #DIV/0! |
| NSFP1   | 0.2380952381  | 0.2380952381  | 0            |  | inf          | #DIV/0! |
| NSG2    | 0             | 0             | 0.0555555556 |  | 0            | #DIV/0! |
| NSL1    | 0.09523809524 | 0.09523809524 | 0            |  | inf          | #DIV/0! |
| NSMAF   | 0.1428571429  | 0.1428571429  | 0.1666666667 |  | 0.6666666667 | #DIV/0! |
| NSMCE1  | 0.04761904762 | 0.04761904762 | 0            |  | inf          | #DIV/0! |
| MCE1-1  | 0.04761904762 | 0.04761904762 | 0            |  | inf          | #DIV/0! |
| NSMCE2  | 0.1428571429  | 0.1428571429  | 0.1111111111 |  | 1.083333333  | #DIV/0! |
| SMCE4   | 0.2380952381  | 0.2380952381  | 0.0555555556 |  | 4.375        | #DIV/0! |
| NSMF    | 0.09523809524 | 0.09523809524 | 0            |  | inf          | #DIV/0! |
| NSRP1   | 0             | 0             | 0.0555555556 |  | 0            | #DIV/0! |
| NSUN2   | 0             | 0             | 0.0555555556 |  | 0            | #DIV/0! |
| NSUN3   | 0.04761904762 | 0.04761904762 | 0.0555555556 |  | 0.7          | #DIV/0! |
| NSUN4   | 0.04761904762 | 0.04761904762 | 0.0555555556 |  | 0.7          | #DIV/0! |
| NSUN5   | 0.1428571429  | 0.1428571429  | 0.1111111111 |  | 1.083333333  | #DIV/0! |
| NSUN5P  | 0.1428571429  | 0.1428571429  | 0.1666666667 |  | 0.6666666667 | #DIV/0! |
| NSUN5P  | 0.1428571429  | 0.1428571429  | 0.1111111111 |  | 1.083333333  | #DIV/0! |
| NSUN6   | 0.09523809524 | 0.09523809524 | 0.1111111111 |  | 0.6842105263 | #DIV/0! |
| NSUN7   | 0.1904761905  | 0.1904761905  | 0.0555555556 |  | 3.294117647  | #DIV/0! |
| NT5C    | 0.04761904762 | 0.04761904762 | 0.0555555556 |  | 0.7          | #DIV/0! |
| NT5C1A  | 0.04761904762 | 0.04761904762 | 0.0555555556 |  | 0.7          | #DIV/0! |
| NT5C1B  | 0             | 0             | 0.0555555556 |  | 0            | #DIV/0! |
| C1B-RD  | 0             | 0             | 0.0555555556 |  | 0            | #DIV/0! |
| NT5C2   | 0.1428571429  | 0.1428571429  | 0.0555555556 |  | 2.333333333  | #DIV/0! |
| NT5C3A  | 0.04761904762 | 0.04761904762 | 0.1666666667 |  | 0.2          | #DIV/0! |
| NT5C3B  | 0.09523809524 | 0.09523809524 | 0            |  | inf          | #DIV/0! |
| NT5DC2  | 0.04761904762 | 0.04761904762 | 0            |  | inf          | #DIV/0! |
| NT5DC3  | 0.04761904762 | 0.04761904762 | 0.0555555556 |  | 0.7          | #DIV/0! |
| NT5DC4  | 0             | 0             | 0.0555555556 |  | 0            | #DIV/0! |

|        |               |               |               |  |              |         |
|--------|---------------|---------------|---------------|--|--------------|---------|
| NT5M   | 0.04761904762 | 0.04761904762 | 0.1111111111  |  | 0.325        | #DIV/0! |
| NTAN1  | 0.04761904762 | 0.04761904762 | 0             |  | inf          | #DIV/0! |
| NTF3   | 0.04761904762 | 0.04761904762 | 0.1111111111  |  | 0.325        | #DIV/0! |
| NTF4   | 0.09523809524 | 0.09523809524 | 0.1111111111  |  | 0.6842105263 | #DIV/0! |
| NTHL1  | 0.09523809524 | 0.09523809524 | 0.2222222222  |  | 0.2894736842 | #DIV/0! |
| NTMT1  | 0.09523809524 | 0.09523809524 | 0.05555555556 |  | 1.473684211  | #DIV/0! |
| NTN1   | 0.04761904762 | 0.04761904762 | 0.05555555556 |  | 0.7          | #DIV/0! |
| NTN3   | 0.09523809524 | 0.09523809524 | 0.2222222222  |  | 0.2894736842 | #DIV/0! |
| NTN4   | 0.04761904762 | 0.04761904762 | 0.05555555556 |  | 0.7          | #DIV/0! |
| NTN5   | 0.09523809524 | 0.09523809524 | 0.1111111111  |  | 0.6842105263 | #DIV/0! |
| NTNG1  | 0.04761904762 | 0.04761904762 | 0.05555555556 |  | 0.7          | #DIV/0! |
| NTNG2  | 0.09523809524 | 0.09523809524 | 0             |  | inf          | #DIV/0! |
| NTPCR  | 0.1428571429  | 0.1428571429  | 0             |  | inf          | #DIV/0! |
| NTRK1  | 0.1428571429  | 0.1428571429  | 0.05555555556 |  | 2.333333333  | #DIV/0! |
| NTRK2  | 0             | 0             | 0.05555555556 |  | 0            | #DIV/0! |
| NTRK3  | 0.04761904762 | 0.04761904762 | 0.05555555556 |  | 0.7          | #DIV/0! |
| TRK3-A | 0.04761904762 | 0.04761904762 | 0.05555555556 |  | 0.7          | #DIV/0! |
| NTS    | 0.04761904762 | 0.04761904762 | 0.05555555556 |  | 0.7          | #DIV/0! |
| NTSR1  | 0.1428571429  | 0.1428571429  | 0.2222222222  |  | 0.4583333333 | #DIV/0! |
| NTSR2  | 0             | 0             | 0.05555555556 |  | 0            | #DIV/0! |
| NUAK1  | 0.04761904762 | 0.04761904762 | 0.05555555556 |  | 0.7          | #DIV/0! |
| NUAK2  | 0.1904761905  | 0.1904761905  | 0             |  | inf          | #DIV/0! |
| NUB1   | 0.09523809524 | 0.09523809524 | 0.05555555556 |  | 1.473684211  | #DIV/0! |
| NUBP1  | 0.04761904762 | 0.04761904762 | 0             |  | inf          | #DIV/0! |
| NUBP2  | 0.09523809524 | 0.09523809524 | 0.2222222222  |  | 0.2894736842 | #DIV/0! |
| NUBPL  | 0             | 0             | 0             |  |              | #DIV/0! |
| NUCB1  | 0.09523809524 | 0.09523809524 | 0.1111111111  |  | 0.6842105263 | #DIV/0! |
| UCB1-A | 0.09523809524 | 0.09523809524 | 0.1111111111  |  | 0.6842105263 | #DIV/0! |
| NUCKS1 | 0.1428571429  | 0.1428571429  | 0             |  | inf          | #DIV/0! |
| NUDC   | 0.04761904762 | 0.04761904762 | 0.1111111111  |  | 0.325        | #DIV/0! |
| NUDCD1 | 0.1904761905  | 0.1904761905  | 0.1111111111  |  | 1.529411765  | #DIV/0! |
| NUDCD2 | 0             | 0             | 0.05555555556 |  | 0            | #DIV/0! |
| NUDCD3 | 0.04761904762 | 0.04761904762 | 0.2222222222  |  | 0.1375       | #DIV/0! |
| NUDT1  | 0.04761904762 | 0.04761904762 | 0.1666666667  |  | 0.2          | #DIV/0! |
| NUDT12 | 0.04761904762 | 0.04761904762 | 0             |  | inf          | #DIV/0! |
| NUDT13 | 0.1904761905  | 0.1904761905  | 0.05555555556 |  | 3.294117647  | #DIV/0! |
| NUDT16 | 0.09523809524 | 0.09523809524 | 0.05555555556 |  | 1.473684211  | #DIV/0! |
| UDT16L | 0.04761904762 | 0.04761904762 | 0             |  | inf          | #DIV/0! |
| UDT16R | 0.09523809524 | 0.09523809524 | 0.05555555556 |  | 1.473684211  | #DIV/0! |
| NUDT17 | 0.1428571429  | 0.1428571429  | 0.05555555556 |  | 2.333333333  | #DIV/0! |
| NUDT18 | 0.09523809524 | 0.09523809524 | 0.1111111111  |  | 0.6842105263 | #DIV/0! |
| NUDT19 | 0.04761904762 | 0.04761904762 | 0.05555555556 |  | 0.7          | #DIV/0! |
| NUDT2  | 0.09523809524 | 0.09523809524 | 0.05555555556 |  | 1.473684211  | #DIV/0! |
| NUDT21 | 0.04761904762 | 0.04761904762 | 0             |  | inf          | #DIV/0! |
| NUDT3  | 0.04761904762 | 0.04761904762 | 0             |  | inf          | #DIV/0! |
| NUDT4  | 0.04761904762 | 0.04761904762 | 0.05555555556 |  | 0.7          | #DIV/0! |
| NUDT4B | 0.04761904762 | 0.04761904762 | 0.05555555556 |  | 0.7          | #DIV/0! |
| UDT4P  | 0.04761904762 | 0.04761904762 | 0.05555555556 |  | 0.7          | #DIV/0! |
| NUDT5  | 0.09523809524 | 0.09523809524 | 0.1111111111  |  | 0.6842105263 | #DIV/0! |
| NUDT6  | 0             | 0             | 0.05555555556 |  | 0            | #DIV/0! |
| NUDT7  | 0.09523809524 | 0.09523809524 | 0             |  | inf          | #DIV/0! |

|         |               |               |               |  |              |         |
|---------|---------------|---------------|---------------|--|--------------|---------|
| NUDT9   | 0             | 0             | 0.05555555556 |  | 0            | #DIV/0! |
| NUDT9P  | 0.1428571429  | 0.1428571429  | 0.1111111111  |  | 1.083333333  | #DIV/0! |
| NUF2    | 0.1428571429  | 0.1428571429  | 0             |  | inf          | #DIV/0! |
| NUFIP2  | 0.04761904762 | 0.04761904762 | 0.05555555556 |  | 0.7          | #DIV/0! |
| NUGGC   | 0.04761904762 | 0.04761904762 | 0.1111111111  |  | 0.325        | #DIV/0! |
| NUMB    | 0.09523809524 | 0.09523809524 | 0             |  | inf          | #DIV/0! |
| NUMBL   | 0.04761904762 | 0.04761904762 | 0.05555555556 |  | 0.7          | #DIV/0! |
| NUP107  | 0.09523809524 | 0.09523809524 | 0.05555555556 |  | 1.473684211  | #DIV/0! |
| NUP133  | 0.1428571429  | 0.1428571429  | 0             |  | inf          | #DIV/0! |
| NUP155  | 0.09523809524 | 0.09523809524 | 0.05555555556 |  | 1.473684211  | #DIV/0! |
| NUP160  | 0             | 0             | 0.05555555556 |  | 0            | #DIV/0! |
| NUP205  | 0.04761904762 | 0.04761904762 | 0.05555555556 |  | 0.7          | #DIV/0! |
| NUP210  | 0.04761904762 | 0.04761904762 | 0             |  | inf          | #DIV/0! |
| NUP210I | 0.1904761905  | 0.1904761905  | 0.05555555556 |  | 3.294117647  | #DIV/0! |
| UP210P  | 0.04761904762 | 0.04761904762 | 0.05555555556 |  | 0.7          | #DIV/0! |
| NUP214  | 0.09523809524 | 0.09523809524 | 0.05555555556 |  | 1.473684211  | #DIV/0! |
| NUP35   | 0             | 0             | 0.05555555556 |  | 0            | #DIV/0! |
| NUP37   | 0.04761904762 | 0.04761904762 | 0.05555555556 |  | 0.7          | #DIV/0! |
| NUP43   | 0             | 0             | 0             |  |              | #DIV/0! |
| NUP50   | 0             | 0             | 0.1111111111  |  | 0            | #DIV/0! |
| UP50-D  | 0             | 0             | 0.1111111111  |  | 0            | #DIV/0! |
| NUP54   | 0.04761904762 | 0.04761904762 | 0.05555555556 |  | 0.7          | #DIV/0! |
| NUP62   | 0.09523809524 | 0.09523809524 | 0.1111111111  |  | 0.6842105263 | #DIV/0! |
| NUP85   | 0.04761904762 | 0.04761904762 | 0.05555555556 |  | 0.7          | #DIV/0! |
| NUP88   | 0             | 0             | 0.1111111111  |  | 0            | #DIV/0! |
| NUP93   | 0.04761904762 | 0.04761904762 | 0             |  | inf          | #DIV/0! |
| NUP98   | 0.04761904762 | 0.04761904762 | 0             |  | inf          | #DIV/0! |
| NUPL2   | 0.04761904762 | 0.04761904762 | 0.1666666667  |  | 0.2          | #DIV/0! |
| NUPR1   | 0.04761904762 | 0.04761904762 | 0             |  | inf          | #DIV/0! |
| NUPR2   | 0.2380952381  | 0.2380952381  | 0.1666666667  |  | 1.25         | #DIV/0! |
| NUTF2   | 0.1428571429  | 0.1428571429  | 0.05555555556 |  | 2.333333333  | #DIV/0! |
| UTM2A   | 0.1428571429  | 0.1428571429  | 0.1111111111  |  | 1.083333333  | #DIV/0! |
| TM2A-A  | 0.1428571429  | 0.1428571429  | 0.1111111111  |  | 1.083333333  | #DIV/0! |
| UTM2I   | 0.1428571429  | 0.1428571429  | 0             |  | inf          | #DIV/0! |
| TM2B-A  | 0.1428571429  | 0.1428571429  | 0.05555555556 |  | 2.333333333  | #DIV/0! |
| UTM2I   | 0.1428571429  | 0.1428571429  | 0.1111111111  |  | 1.083333333  | #DIV/0! |
| UTM2I   | 0.1428571429  | 0.1428571429  | 0             |  | inf          | #DIV/0! |
| UTM2I   | 0.04761904762 | 0.04761904762 | 0.05555555556 |  | 0.7          | #DIV/0! |
| UTM2C   | 0.04761904762 | 0.04761904762 | 0             |  | inf          | #DIV/0! |
| NVL     | 0.1428571429  | 0.1428571429  | 0.05555555556 |  | 2.333333333  | #DIV/0! |
| NWD1    | 0.1428571429  | 0.1428571429  | 0.1111111111  |  | 1.083333333  | #DIV/0! |
| NXN     | 0             | 0             | 0.1111111111  |  | 0            | #DIV/0! |
| NXNL2   | 0             | 0             | 0.05555555556 |  | 0            | #DIV/0! |
| NXPE3   | 0.09523809524 | 0.09523809524 | 0.05555555556 |  | 1.473684211  | #DIV/0! |
| NXPH1   | 0.04761904762 | 0.04761904762 | 0.1666666667  |  | 0.2          | #DIV/0! |
| NXPH2   | 0             | 0             | 0.05555555556 |  | 0            | #DIV/0! |
| NXPH3   | 0.09523809524 | 0.09523809524 | 0             |  | inf          | #DIV/0! |
| NXPH4   | 0.1428571429  | 0.1428571429  | 0.05555555556 |  | 2.333333333  | #DIV/0! |
| NXT1    | 0.1904761905  | 0.1904761905  | 0.05555555556 |  | 3.294117647  | #DIV/0! |
| NYAP1   | 0.04761904762 | 0.04761904762 | 0.05555555556 |  | 0.7          | #DIV/0! |
| NYAP2   | 0             | 0             | 0.05555555556 |  | 0            | #DIV/0! |

|               |               |               |               |  |              |         |
|---------------|---------------|---------------|---------------|--|--------------|---------|
| <b>DACYL1</b> | 0.09523809524 | 0.09523809524 | 0             |  | inf          | #DIV/0! |
| <b>OARD1</b>  | 0             | 0             | 0.05555555556 |  | 0            | #DIV/0! |
| <b>OAS1</b>   | 0             | 0             | 0.05555555556 |  | 0            | #DIV/0! |
| <b>OAS2</b>   | 0             | 0             | 0.05555555556 |  | 0            | #DIV/0! |
| <b>OAS3</b>   | 0             | 0             | 0.05555555556 |  | 0            | #DIV/0! |
| <b>OASL</b>   | 0.04761904762 | 0.04761904762 | 0.1111111111  |  | 0.325        | #DIV/0! |
| <b>OAT</b>    | 0.2380952381  | 0.2380952381  | 0.05555555556 |  | 4.375        | #DIV/0! |
| <b>OAZ1</b>   | 0.09523809524 | 0.09523809524 | 0.1111111111  |  | 0.6842105263 | #DIV/0! |
| <b>OAZ2</b>   | 0.04761904762 | 0.04761904762 | 0.05555555556 |  | 0.7          | #DIV/0! |
| <b>OAZ3</b>   | 0.1904761905  | 0.1904761905  | 0             |  | inf          | #DIV/0! |
| <b>OBP2A</b>  | 0.04761904762 | 0.04761904762 | 0             |  | inf          | #DIV/0! |
| <b>OBP2B</b>  | 0.04761904762 | 0.04761904762 | 0             |  | inf          | #DIV/0! |
| <b>OBSCN</b>  | 0.1428571429  | 0.1428571429  | 0             |  | inf          | #DIV/0! |
| <b>BSCN-A</b> | 0.1428571429  | 0.1428571429  | 0             |  | inf          | #DIV/0! |
| <b>OBSL1</b>  | 0             | 0             | 0.05555555556 |  | 0            | #DIV/0! |
| <b>OC90</b>   | 0.04761904762 | 0.04761904762 | 0.1111111111  |  | 0.325        | #DIV/0! |
| <b>OCEL1</b>  | 0.1428571429  | 0.1428571429  | 0.1111111111  |  | 1.083333333  | #DIV/0! |
| <b>OCIAD1</b> | 0.09523809524 | 0.09523809524 | 0.1111111111  |  | 0.6842105263 | #DIV/0! |
| <b>IAD1-A</b> | 0.09523809524 | 0.09523809524 | 0.1111111111  |  | 0.6842105263 | #DIV/0! |
| <b>OCIAD2</b> | 0.09523809524 | 0.09523809524 | 0.1111111111  |  | 0.6842105263 | #DIV/0! |
| <b>OCLM</b>   | 0.1428571429  | 0.1428571429  | 0.05555555556 |  | 2.333333333  | #DIV/0! |
| <b>OCLN</b>   | 0.09523809524 | 0.09523809524 | 0.1666666667  |  | 0.4210526316 | #DIV/0! |
| <b>DCLNP1</b> | 0.09523809524 | 0.09523809524 | 0.1666666667  |  | 0.4210526316 | #DIV/0! |
| <b>OCM</b>    | 0.04761904762 | 0.04761904762 | 0.1666666667  |  | 0.2          | #DIV/0! |
| <b>OCM2</b>   | 0.04761904762 | 0.04761904762 | 0.05555555556 |  | 0.7          | #DIV/0! |
| <b>CSTAM</b>  | 0.1428571429  | 0.1428571429  | 0.1666666667  |  | 0.6666666667 | #DIV/0! |
| <b>ODAM</b>   | 0.04761904762 | 0.04761904762 | 0.05555555556 |  | 0.7          | #DIV/0! |
| <b>ODAPH</b>  | 0.04761904762 | 0.04761904762 | 0.05555555556 |  | 0.7          | #DIV/0! |
| <b>ODC1</b>   | 0             | 0             | 0.05555555556 |  | 0            | #DIV/0! |
| <b>ODC1-D</b> | 0             | 0             | 0.05555555556 |  | 0            | #DIV/0! |
| <b>ODF1</b>   | 0.1904761905  | 0.1904761905  | 0.1111111111  |  | 1.529411765  | #DIV/0! |
| <b>ODF2L</b>  | 0.04761904762 | 0.04761904762 | 0.05555555556 |  | 0.7          | #DIV/0! |
| <b>ODF3</b>   | 0.04761904762 | 0.04761904762 | 0             |  | inf          | #DIV/0! |
| <b>ODF3B</b>  | 0             | 0             | 0.1111111111  |  | 0            | #DIV/0! |
| <b>ODF3L1</b> | 0.04761904762 | 0.04761904762 | 0.05555555556 |  | 0.7          | #DIV/0! |
| <b>ODF3L2</b> | 0.09523809524 | 0.09523809524 | 0.1111111111  |  | 0.6842105263 | #DIV/0! |
| <b>ODF4</b>   | 0.04761904762 | 0.04761904762 | 0.05555555556 |  | 0.7          | #DIV/0! |
| <b>ODR4</b>   | 0.1428571429  | 0.1428571429  | 0.05555555556 |  | 2.333333333  | #DIV/0! |
| <b>OGA</b>    | 0.1428571429  | 0.1428571429  | 0             |  | inf          | #DIV/0! |
| <b>OGDH</b>   | 0.04761904762 | 0.04761904762 | 0.2222222222  |  | 0.1375       | #DIV/0! |
| <b>OGDHL</b>  | 0.04761904762 | 0.04761904762 | 0.05555555556 |  | 0.7          | #DIV/0! |
| <b>OGFOD1</b> | 0.04761904762 | 0.04761904762 | 0             |  | inf          | #DIV/0! |
| <b>OGFOD2</b> | 0.04761904762 | 0.04761904762 | 0.1111111111  |  | 0.325        | #DIV/0! |
| <b>OGFOD3</b> | 0.04761904762 | 0.04761904762 | 0             |  | inf          | #DIV/0! |
| <b>OGFR</b>   | 0.1428571429  | 0.1428571429  | 0.2222222222  |  | 0.4583333333 | #DIV/0! |
| <b>GFR-AS</b> | 0.1428571429  | 0.1428571429  | 0.2222222222  |  | 0.4583333333 | #DIV/0! |
| <b>OGFRP1</b> | 0             | 0             | 0.1111111111  |  | 0            | #DIV/0! |
| <b>OGG1</b>   | 0.09523809524 | 0.09523809524 | 0             |  | inf          | #DIV/0! |
| <b>OGN</b>    | 0.04761904762 | 0.04761904762 | 0.05555555556 |  | 0.7          | #DIV/0! |
| <b>OIT3</b>   | 0.1904761905  | 0.1904761905  | 0.05555555556 |  | 3.294117647  | #DIV/0! |
| <b>OLA1</b>   | 0             | 0             | 0.1111111111  |  | 0            | #DIV/0! |

|                |               |               |               |  |              |         |
|----------------|---------------|---------------|---------------|--|--------------|---------|
| <b>OLAH</b>    | 0.09523809524 | 0.09523809524 | 0.1111111111  |  | 0.6842105263 | #DIV/0! |
| <b>OLFM1</b>   | 0.04761904762 | 0.04761904762 | 0             |  | inf          | #DIV/0! |
| <b>OLFM2</b>   | 0.1428571429  | 0.1428571429  | 0.1111111111  |  | 1.083333333  | #DIV/0! |
| <b>OLFM3</b>   | 0.04761904762 | 0.04761904762 | 0.05555555556 |  | 0.7          | #DIV/0! |
| <b>DLFM51</b>  | 0.04761904762 | 0.04761904762 | 0             |  | inf          | #DIV/0! |
| <b>DLFML1</b>  | 0.04761904762 | 0.04761904762 | 0             |  | inf          | #DIV/0! |
| <b>LFML2</b>   | 0.09523809524 | 0.09523809524 | 0.05555555556 |  | 1.473684211  | #DIV/0! |
| <b>LFML2</b>   | 0.1428571429  | 0.1428571429  | 0             |  | inf          | #DIV/0! |
| <b>DLFML3</b>  | 0.04761904762 | 0.04761904762 | 0.05555555556 |  | 0.7          | #DIV/0! |
| <b>OLIG1</b>   | 0.04761904762 | 0.04761904762 | 0.1111111111  |  | 0.325        | #DIV/0! |
| <b>OLIG2</b>   | 0.04761904762 | 0.04761904762 | 0.1111111111  |  | 0.325        | #DIV/0! |
| <b>LALIN</b>   | 0.1428571429  | 0.1428571429  | 0             |  | inf          | #DIV/0! |
| <b>OLR1</b>    | 0.04761904762 | 0.04761904762 | 0.1111111111  |  | 0.325        | #DIV/0! |
| <b>OMA1</b>    | 0.04761904762 | 0.04761904762 | 0.05555555556 |  | 0.7          | #DIV/0! |
| <b>OMD</b>     | 0.04761904762 | 0.04761904762 | 0.05555555556 |  | 0.7          | #DIV/0! |
| <b>OMG</b>     | 0             | 0             | 0             |  |              | #DIV/0! |
| <b>NECUT1</b>  | 0.04761904762 | 0.04761904762 | 0.05555555556 |  | 0.7          | #DIV/0! |
| <b>NECUT1</b>  | 0.09523809524 | 0.09523809524 | 0             |  | inf          | #DIV/0! |
| <b>NECUT1</b>  | 0.09523809524 | 0.09523809524 | 0.1111111111  |  | 0.6842105263 | #DIV/0! |
| <b>OOEP</b>    | 0.04761904762 | 0.04761904762 | 0             |  | inf          | #DIV/0! |
| <b>OPA1</b>    | 0.09523809524 | 0.09523809524 | 0.05555555556 |  | 1.473684211  | #DIV/0! |
| <b>OPA1-AS</b> | 0.09523809524 | 0.09523809524 | 0.05555555556 |  | 1.473684211  | #DIV/0! |
| <b>OPA3</b>    | 0.09523809524 | 0.09523809524 | 0.1111111111  |  | 0.6842105263 | #DIV/0! |
| <b>OPALIN</b>  | 0.1428571429  | 0.1428571429  | 0             |  | inf          | #DIV/0! |
| <b>OPLAH</b>   | 0.04761904762 | 0.04761904762 | 0.1666666667  |  | 0.2          | #DIV/0! |
| <b>DPN1SW</b>  | 0.04761904762 | 0.04761904762 | 0.05555555556 |  | 0.7          | #DIV/0! |
| <b>OPN3</b>    | 0.1428571429  | 0.1428571429  | 0             |  | inf          | #DIV/0! |
| <b>OPN4</b>    | 0.1428571429  | 0.1428571429  | 0.05555555556 |  | 2.333333333  | #DIV/0! |
| <b>OPN5</b>    | 0.04761904762 | 0.04761904762 | 0.05555555556 |  | 0.7          | #DIV/0! |
| <b>OPRD1</b>   | 0.04761904762 | 0.04761904762 | 0.1111111111  |  | 0.325        | #DIV/0! |
| <b>OPRK1</b>   | 0.09523809524 | 0.09523809524 | 0.1111111111  |  | 0.6842105263 | #DIV/0! |
| <b>OPRL1</b>   | 0.1428571429  | 0.1428571429  | 0.2222222222  |  | 0.4583333333 | #DIV/0! |
| <b>OPRPN</b>   | 0.04761904762 | 0.04761904762 | 0.05555555556 |  | 0.7          | #DIV/0! |
| <b>OPTC</b>    | 0.1904761905  | 0.1904761905  | 0             |  | inf          | #DIV/0! |
| <b>OPTN</b>    | 0.09523809524 | 0.09523809524 | 0.1111111111  |  | 0.6842105263 | #DIV/0! |
| <b>OR10A2</b>  | 0.04761904762 | 0.04761904762 | 0             |  | inf          | #DIV/0! |
| <b>OR10A4</b>  | 0.04761904762 | 0.04761904762 | 0             |  | inf          | #DIV/0! |
| <b>OR10A5</b>  | 0.04761904762 | 0.04761904762 | 0             |  | inf          | #DIV/0! |
| <b>OR10A7</b>  | 0.04761904762 | 0.04761904762 | 0.05555555556 |  | 0.7          | #DIV/0! |
| <b>OR10AC</b>  | 0.04761904762 | 0.04761904762 | 0.05555555556 |  | 0.7          | #DIV/0! |
| <b>OR10AD</b>  | 0.04761904762 | 0.04761904762 | 0.05555555556 |  | 0.7          | #DIV/0! |
| <b>OR10H1</b>  | 0.1428571429  | 0.1428571429  | 0.1111111111  |  | 1.083333333  | #DIV/0! |
| <b>OR10H2</b>  | 0.1428571429  | 0.1428571429  | 0.1111111111  |  | 1.083333333  | #DIV/0! |
| <b>OR10H3</b>  | 0.1428571429  | 0.1428571429  | 0.1111111111  |  | 1.083333333  | #DIV/0! |
| <b>OR10H4</b>  | 0.1428571429  | 0.1428571429  | 0.1111111111  |  | 1.083333333  | #DIV/0! |
| <b>OR10H5</b>  | 0.1428571429  | 0.1428571429  | 0.1111111111  |  | 1.083333333  | #DIV/0! |
| <b>OR10J1</b>  | 0.1428571429  | 0.1428571429  | 0             |  | inf          | #DIV/0! |
| <b>OR10J3</b>  | 0.1428571429  | 0.1428571429  | 0             |  | inf          | #DIV/0! |
| <b>OR10J4</b>  | 0.1428571429  | 0.1428571429  | 0             |  | inf          | #DIV/0! |
| <b>OR10J5</b>  | 0.1428571429  | 0.1428571429  | 0             |  | inf          | #DIV/0! |
| <b>OR10K1</b>  | 0.1428571429  | 0.1428571429  | 0.05555555556 |  | 2.333333333  | #DIV/0! |

|        |               |               |              |  |             |         |
|--------|---------------|---------------|--------------|--|-------------|---------|
| OR10K2 | 0.1428571429  | 0.1428571429  | 0.0555555556 |  | 2.333333333 | #DIV/0! |
| OR10P1 | 0.04761904762 | 0.04761904762 | 0.0555555556 |  | 0.7         | #DIV/0! |
| OR10R2 | 0.1428571429  | 0.1428571429  | 0.0555555556 |  | 2.333333333 | #DIV/0! |
| OR10T2 | 0.1428571429  | 0.1428571429  | 0.0555555556 |  | 2.333333333 | #DIV/0! |
| OR10X1 | 0.1428571429  | 0.1428571429  | 0.0555555556 |  | 2.333333333 | #DIV/0! |
| OR10Z1 | 0.1428571429  | 0.1428571429  | 0.0555555556 |  | 2.333333333 | #DIV/0! |
| OR11G2 | 0.04761904762 | 0.04761904762 | 0            |  | inf         | #DIV/0! |
| OR11H1 | 0.09523809524 | 0.09523809524 | 0.0555555556 |  | 1.473684211 | #DIV/0! |
| OR11H1 | 0.1428571429  | 0.1428571429  | 0.1111111111 |  | 1.083333333 | #DIV/0! |
| OR11H2 | 0.1428571429  | 0.1428571429  | 0.1111111111 |  | 1.083333333 | #DIV/0! |
| OR11H4 | 0.04761904762 | 0.04761904762 | 0            |  | inf         | #DIV/0! |
| OR11H6 | 0.04761904762 | 0.04761904762 | 0            |  | inf         | #DIV/0! |
| OR11H7 | 0.04761904762 | 0.04761904762 | 0            |  | inf         | #DIV/0! |
| OR11L1 | 0.1428571429  | 0.1428571429  | 0            |  | inf         | #DIV/0! |
| OR13A1 | 0.1428571429  | 0.1428571429  | 0.0555555556 |  | 2.333333333 | #DIV/0! |
| OR13C2 | 0.04761904762 | 0.04761904762 | 0            |  | inf         | #DIV/0! |
| OR13C3 | 0.04761904762 | 0.04761904762 | 0            |  | inf         | #DIV/0! |
| OR13C4 | 0.04761904762 | 0.04761904762 | 0            |  | inf         | #DIV/0! |
| OR13C5 | 0.04761904762 | 0.04761904762 | 0            |  | inf         | #DIV/0! |
| OR13C8 | 0.04761904762 | 0.04761904762 | 0            |  | inf         | #DIV/0! |
| OR13C9 | 0.04761904762 | 0.04761904762 | 0            |  | inf         | #DIV/0! |
| OR13D1 | 0.04761904762 | 0.04761904762 | 0            |  | inf         | #DIV/0! |
| OR13F1 | 0.04761904762 | 0.04761904762 | 0            |  | inf         | #DIV/0! |
| OR13G1 | 0.1428571429  | 0.1428571429  | 0            |  | inf         | #DIV/0! |
| OR13J1 | 0.09523809524 | 0.09523809524 | 0.0555555556 |  | 1.473684211 | #DIV/0! |
| OR14A1 | 0.1428571429  | 0.1428571429  | 0            |  | inf         | #DIV/0! |
| OR14A2 | 0.1428571429  | 0.1428571429  | 0            |  | inf         | #DIV/0! |
| OR14C3 | 0.1428571429  | 0.1428571429  | 0            |  | inf         | #DIV/0! |
| OR14I1 | 0.1428571429  | 0.1428571429  | 0            |  | inf         | #DIV/0! |
| OR14K1 | 0.1428571429  | 0.1428571429  | 0            |  | inf         | #DIV/0! |
| OR1A1  | 0             | 0             | 0.1111111111 |  | 0           | #DIV/0! |
| OR1A2  | 0             | 0             | 0.1111111111 |  | 0           | #DIV/0! |
| OR1B1  | 0.09523809524 | 0.09523809524 | 0.0555555556 |  | 1.473684211 | #DIV/0! |
| OR1C1  | 0.1428571429  | 0.1428571429  | 0            |  | inf         | #DIV/0! |
| OR1D2  | 0             | 0             | 0.1111111111 |  | 0           | #DIV/0! |
| OR1D4  | 0             | 0             | 0.1111111111 |  | 0           | #DIV/0! |
| OR1D5  | 0             | 0             | 0.1111111111 |  | 0           | #DIV/0! |
| OR1E1  | 0             | 0             | 0.1111111111 |  | 0           | #DIV/0! |
| OR1E2  | 0             | 0             | 0.1111111111 |  | 0           | #DIV/0! |
| OR1E3  | 0             | 0             | 0.1111111111 |  | 0           | #DIV/0! |
| OR1F1  | 0.04761904762 | 0.04761904762 | 0.1111111111 |  | 0.325       | #DIV/0! |
| OR1F2P | 0.04761904762 | 0.04761904762 | 0.1111111111 |  | 0.325       | #DIV/0! |
| OR1G1  | 0             | 0             | 0.1111111111 |  | 0           | #DIV/0! |
| OR1I1  | 0.1428571429  | 0.1428571429  | 0.1111111111 |  | 1.083333333 | #DIV/0! |
| OR1J1  | 0.09523809524 | 0.09523809524 | 0.0555555556 |  | 1.473684211 | #DIV/0! |
| OR1J2  | 0.09523809524 | 0.09523809524 | 0.0555555556 |  | 1.473684211 | #DIV/0! |
| OR1J4  | 0.09523809524 | 0.09523809524 | 0.0555555556 |  | 1.473684211 | #DIV/0! |
| OR1K1  | 0.09523809524 | 0.09523809524 | 0.0555555556 |  | 1.473684211 | #DIV/0! |
| OR1L1  | 0.09523809524 | 0.09523809524 | 0.0555555556 |  | 1.473684211 | #DIV/0! |
| OR1L3  | 0.09523809524 | 0.09523809524 | 0.0555555556 |  | 1.473684211 | #DIV/0! |
| OR1L4  | 0.09523809524 | 0.09523809524 | 0.0555555556 |  | 1.473684211 | #DIV/0! |

|         |               |               |               |  |             |         |
|---------|---------------|---------------|---------------|--|-------------|---------|
| OR1L6   | 0.09523809524 | 0.09523809524 | 0.05555555556 |  | 1.473684211 | #DIV/0! |
| OR1L8   | 0.09523809524 | 0.09523809524 | 0.05555555556 |  | 1.473684211 | #DIV/0! |
| OR1M1   | 0.1428571429  | 0.1428571429  | 0.05555555556 |  | 2.333333333 | #DIV/0! |
| OR1N1   | 0.09523809524 | 0.09523809524 | 0.05555555556 |  | 1.473684211 | #DIV/0! |
| OR1N2   | 0.09523809524 | 0.09523809524 | 0.05555555556 |  | 1.473684211 | #DIV/0! |
| OR1Q1   | 0.09523809524 | 0.09523809524 | 0.05555555556 |  | 1.473684211 | #DIV/0! |
| OR2A1   | 0.09523809524 | 0.09523809524 | 0.05555555556 |  | 1.473684211 | #DIV/0! |
| R2A1-A5 | 0.09523809524 | 0.09523809524 | 0.05555555556 |  | 1.473684211 | #DIV/0! |
| OR2A12  | 0.04761904762 | 0.04761904762 | 0.05555555556 |  | 0.7         | #DIV/0! |
| OR2A14  | 0.04761904762 | 0.04761904762 | 0.05555555556 |  | 0.7         | #DIV/0! |
| OR2A2   | 0.04761904762 | 0.04761904762 | 0.05555555556 |  | 0.7         | #DIV/0! |
| OR2A20  | 0.09523809524 | 0.09523809524 | 0.05555555556 |  | 1.473684211 | #DIV/0! |
| OR2A25  | 0.04761904762 | 0.04761904762 | 0.05555555556 |  | 0.7         | #DIV/0! |
| OR2A42  | 0.09523809524 | 0.09523809524 | 0.05555555556 |  | 1.473684211 | #DIV/0! |
| OR2A5   | 0.04761904762 | 0.04761904762 | 0.05555555556 |  | 0.7         | #DIV/0! |
| OR2A7   | 0.09523809524 | 0.09523809524 | 0.05555555556 |  | 1.473684211 | #DIV/0! |
| OR2A9P  | 0.09523809524 | 0.09523809524 | 0.05555555556 |  | 1.473684211 | #DIV/0! |
| OR2AE1  | 0.04761904762 | 0.04761904762 | 0.05555555556 |  | 0.7         | #DIV/0! |
| OR2AG1  | 0.04761904762 | 0.04761904762 | 0             |  | inf         | #DIV/0! |
| OR2AG2  | 0.04761904762 | 0.04761904762 | 0             |  | inf         | #DIV/0! |
| OR2AJ1  | 0.1428571429  | 0.1428571429  | 0             |  | inf         | #DIV/0! |
| OR2AK2  | 0.1428571429  | 0.1428571429  | 0             |  | inf         | #DIV/0! |
| OR2AP1  | 0.04761904762 | 0.04761904762 | 0.05555555556 |  | 0.7         | #DIV/0! |
| OR2B11  | 0.1428571429  | 0.1428571429  | 0             |  | inf         | #DIV/0! |
| OR2C1   | 0.04761904762 | 0.04761904762 | 0.1111111111  |  | 0.325       | #DIV/0! |
| OR2C3   | 0.1428571429  | 0.1428571429  | 0             |  | inf         | #DIV/0! |
| OR2D2   | 0.04761904762 | 0.04761904762 | 0             |  | inf         | #DIV/0! |
| OR2D3   | 0.04761904762 | 0.04761904762 | 0             |  | inf         | #DIV/0! |
| OR2F1   | 0.04761904762 | 0.04761904762 | 0.05555555556 |  | 0.7         | #DIV/0! |
| OR2F2   | 0.04761904762 | 0.04761904762 | 0.05555555556 |  | 0.7         | #DIV/0! |
| OR2G2   | 0.1428571429  | 0.1428571429  | 0             |  | inf         | #DIV/0! |
| OR2G3   | 0.1428571429  | 0.1428571429  | 0             |  | inf         | #DIV/0! |
| OR2G6   | 0.1428571429  | 0.1428571429  | 0             |  | inf         | #DIV/0! |
| OR2K2   | 0.04761904762 | 0.04761904762 | 0.05555555556 |  | 0.7         | #DIV/0! |
| OR2L13  | 0.1428571429  | 0.1428571429  | 0             |  | inf         | #DIV/0! |
| OR2L1P  | 0.1428571429  | 0.1428571429  | 0             |  | inf         | #DIV/0! |
| OR2L2   | 0.1428571429  | 0.1428571429  | 0             |  | inf         | #DIV/0! |
| OR2L3   | 0.1428571429  | 0.1428571429  | 0             |  | inf         | #DIV/0! |
| OR2L5   | 0.1428571429  | 0.1428571429  | 0             |  | inf         | #DIV/0! |
| OR2L8   | 0.1428571429  | 0.1428571429  | 0             |  | inf         | #DIV/0! |
| OR2M1F  | 0.1428571429  | 0.1428571429  | 0             |  | inf         | #DIV/0! |
| OR2M2   | 0.1428571429  | 0.1428571429  | 0             |  | inf         | #DIV/0! |
| OR2M3   | 0.1428571429  | 0.1428571429  | 0             |  | inf         | #DIV/0! |
| OR2M4   | 0.1428571429  | 0.1428571429  | 0             |  | inf         | #DIV/0! |
| OR2M5   | 0.1428571429  | 0.1428571429  | 0             |  | inf         | #DIV/0! |
| OR2M7   | 0.1428571429  | 0.1428571429  | 0             |  | inf         | #DIV/0! |
| OR2S2   | 0.09523809524 | 0.09523809524 | 0.05555555556 |  | 1.473684211 | #DIV/0! |
| OR2T1   | 0.1428571429  | 0.1428571429  | 0             |  | inf         | #DIV/0! |
| OR2T10  | 0.1428571429  | 0.1428571429  | 0             |  | inf         | #DIV/0! |
| OR2T11  | 0.1428571429  | 0.1428571429  | 0             |  | inf         | #DIV/0! |
| OR2T12  | 0.1428571429  | 0.1428571429  | 0             |  | inf         | #DIV/0! |



|         |               |               |               |  |              |         |
|---------|---------------|---------------|---------------|--|--------------|---------|
| OR2T2   | 0.1428571429  | 0.1428571429  | 0             |  | inf          | #DIV/0! |
| OR2T27  | 0.1428571429  | 0.1428571429  | 0             |  | inf          | #DIV/0! |
| OR2T29  | 0.1428571429  | 0.1428571429  | 0             |  | inf          | #DIV/0! |
| OR2T3   | 0.1428571429  | 0.1428571429  | 0             |  | inf          | #DIV/0! |
| OR2T33  | 0.1428571429  | 0.1428571429  | 0             |  | inf          | #DIV/0! |
| OR2T34  | 0.1428571429  | 0.1428571429  | 0             |  | inf          | #DIV/0! |
| OR2T35  | 0.1428571429  | 0.1428571429  | 0             |  | inf          | #DIV/0! |
| OR2T4   | 0.1428571429  | 0.1428571429  | 0             |  | inf          | #DIV/0! |
| OR2T5   | 0.1428571429  | 0.1428571429  | 0             |  | inf          | #DIV/0! |
| OR2T6   | 0.1428571429  | 0.1428571429  | 0             |  | inf          | #DIV/0! |
| OR2T7   | 0.1428571429  | 0.1428571429  | 0             |  | inf          | #DIV/0! |
| OR2T8   | 0.1428571429  | 0.1428571429  | 0             |  | inf          | #DIV/0! |
| OR2V1   | 0.09523809524 | 0.09523809524 | 0.05555555556 |  | 1.473684211  | #DIV/0! |
| OR2V2   | 0.09523809524 | 0.09523809524 | 0.05555555556 |  | 1.473684211  | #DIV/0! |
| OR2W3   | 0.1428571429  | 0.1428571429  | 0             |  | inf          | #DIV/0! |
| OR2W5   | 0.1428571429  | 0.1428571429  | 0             |  | inf          | #DIV/0! |
| OR2Y1   | 0.09523809524 | 0.09523809524 | 0.05555555556 |  | 1.473684211  | #DIV/0! |
| OR2Z1   | 0.1428571429  | 0.1428571429  | 0.05555555556 |  | 2.333333333  | #DIV/0! |
| OR3A1   | 0             | 0             | 0.1111111111  |  | 0            | #DIV/0! |
| OR3A2   | 0             | 0             | 0.1111111111  |  | 0            | #DIV/0! |
| OR3A3   | 0             | 0             | 0.1111111111  |  | 0            | #DIV/0! |
| OR3A4P  | 0             | 0             | 0.1111111111  |  | 0            | #DIV/0! |
| OR4A15  | 0.04761904762 | 0.04761904762 | 0             |  | inf          | #DIV/0! |
| OR4A16  | 0.04761904762 | 0.04761904762 | 0             |  | inf          | #DIV/0! |
| OR4A47  | 0             | 0             | 0.05555555556 |  | 0            | #DIV/0! |
| OR4A5   | 0.09523809524 | 0.09523809524 | 0             |  | inf          | #DIV/0! |
| OR4B1   | 0             | 0             | 0.05555555556 |  | 0            | #DIV/0! |
| OR4C11  | 0.04761904762 | 0.04761904762 | 0             |  | inf          | #DIV/0! |
| OR4C15  | 0.04761904762 | 0.04761904762 | 0             |  | inf          | #DIV/0! |
| OR4C16  | 0.04761904762 | 0.04761904762 | 0             |  | inf          | #DIV/0! |
| OR4C3   | 0             | 0             | 0.05555555556 |  | 0            | #DIV/0! |
| OR4C45  | 0             | 0             | 0.05555555556 |  | 0            | #DIV/0! |
| OR4C46  | 0.09523809524 | 0.09523809524 | 0             |  | inf          | #DIV/0! |
| OR4C5   | 0             | 0             | 0.05555555556 |  | 0            | #DIV/0! |
| OR4D1   | 0.09523809524 | 0.09523809524 | 0             |  | inf          | #DIV/0! |
| OR4D2   | 0.09523809524 | 0.09523809524 | 0             |  | inf          | #DIV/0! |
| OR4F13I | 0.04761904762 | 0.04761904762 | 0.05555555556 |  | 0.7          | #DIV/0! |
| OR4F15  | 0.04761904762 | 0.04761904762 | 0.05555555556 |  | 0.7          | #DIV/0! |
| OR4F16  | 0.09523809524 | 0.09523809524 | 0.1666666667  |  | 0.4210526316 | #DIV/0! |
| OR4F17  | 0.09523809524 | 0.09523809524 | 0.1111111111  |  | 0.6842105263 | #DIV/0! |
| OR4F21  | 0.09523809524 | 0.09523809524 | 0.1111111111  |  | 0.6842105263 | #DIV/0! |
| OR4F29  | 0.09523809524 | 0.09523809524 | 0.1666666667  |  | 0.4210526316 | #DIV/0! |
| OR4F3   | 0.09523809524 | 0.09523809524 | 0.1666666667  |  | 0.4210526316 | #DIV/0! |
| OR4F4   | 0.04761904762 | 0.04761904762 | 0.05555555556 |  | 0.7          | #DIV/0! |
| OR4F5   | 0.04761904762 | 0.04761904762 | 0.1666666667  |  | 0.2          | #DIV/0! |
| OR4F6   | 0.04761904762 | 0.04761904762 | 0.05555555556 |  | 0.7          | #DIV/0! |
| OR4K1   | 0.09523809524 | 0.09523809524 | 0             |  | inf          | #DIV/0! |
| OR4K13  | 0.04761904762 | 0.04761904762 | 0             |  | inf          | #DIV/0! |
| OR4K14  | 0.09523809524 | 0.09523809524 | 0             |  | inf          | #DIV/0! |
| OR4K15  | 0.09523809524 | 0.09523809524 | 0             |  | inf          | #DIV/0! |
| OR4K17  | 0.04761904762 | 0.04761904762 | 0             |  | inf          | #DIV/0! |

|        |               |               |               |  |             |         |
|--------|---------------|---------------|---------------|--|-------------|---------|
| OR4K2  | 0.09523809524 | 0.09523809524 | 0.05555555556 |  | 1.473684211 | #DIV/0! |
| OR4K3  | 0.09523809524 | 0.09523809524 | 0.05555555556 |  | 1.473684211 | #DIV/0! |
| OR4K5  | 0.09523809524 | 0.09523809524 | 0.05555555556 |  | 1.473684211 | #DIV/0! |
| OR4L1  | 0.04761904762 | 0.04761904762 | 0             |  | inf         | #DIV/0! |
| OR4M1  | 0.09523809524 | 0.09523809524 | 0.05555555556 |  | 1.473684211 | #DIV/0! |
| OR4M2  | 0.2380952381  | 0.2380952381  | 0.1111111111  |  | 2.03125     | #DIV/0! |
| OR4N2  | 0.09523809524 | 0.09523809524 | 0.05555555556 |  | 1.473684211 | #DIV/0! |
| OR4N3P | 0.2380952381  | 0.2380952381  | 0.1111111111  |  | 2.03125     | #DIV/0! |
| OR4N4  | 0.2380952381  | 0.2380952381  | 0.1111111111  |  | 2.03125     | #DIV/0! |
| OR4N5  | 0.04761904762 | 0.04761904762 | 0             |  | inf         | #DIV/0! |
| OR4Q2  | 0.09523809524 | 0.09523809524 | 0             |  | inf         | #DIV/0! |
| OR4Q3  | 0.09523809524 | 0.09523809524 | 0.05555555556 |  | 1.473684211 | #DIV/0! |
| OR4S1  | 0             | 0             | 0.05555555556 |  | 0           | #DIV/0! |
| OR4X1  | 0             | 0             | 0.05555555556 |  | 0           | #DIV/0! |
| OR4X2  | 0             | 0             | 0.05555555556 |  | 0           | #DIV/0! |
| OR51A2 | 0.04761904762 | 0.04761904762 | 0             |  | inf         | #DIV/0! |
| OR51A4 | 0.04761904762 | 0.04761904762 | 0             |  | inf         | #DIV/0! |
| OR51A7 | 0.04761904762 | 0.04761904762 | 0             |  | inf         | #DIV/0! |
| OR51B2 | 0.04761904762 | 0.04761904762 | 0             |  | inf         | #DIV/0! |
| OR51B4 | 0.04761904762 | 0.04761904762 | 0             |  | inf         | #DIV/0! |
| OR51B5 | 0.04761904762 | 0.04761904762 | 0             |  | inf         | #DIV/0! |
| OR51B6 | 0.04761904762 | 0.04761904762 | 0             |  | inf         | #DIV/0! |
| OR51D1 | 0.04761904762 | 0.04761904762 | 0             |  | inf         | #DIV/0! |
| OR51E1 | 0.04761904762 | 0.04761904762 | 0             |  | inf         | #DIV/0! |
| OR51E2 | 0.04761904762 | 0.04761904762 | 0             |  | inf         | #DIV/0! |
| OR51F1 | 0.04761904762 | 0.04761904762 | 0             |  | inf         | #DIV/0! |
| OR51F2 | 0.04761904762 | 0.04761904762 | 0             |  | inf         | #DIV/0! |
| OR51G1 | 0.04761904762 | 0.04761904762 | 0             |  | inf         | #DIV/0! |
| OR51G2 | 0.04761904762 | 0.04761904762 | 0             |  | inf         | #DIV/0! |
| OR51H1 | 0.04761904762 | 0.04761904762 | 0             |  | inf         | #DIV/0! |
| OR51I1 | 0.04761904762 | 0.04761904762 | 0             |  | inf         | #DIV/0! |
| OR51I2 | 0.04761904762 | 0.04761904762 | 0             |  | inf         | #DIV/0! |
| OR51J1 | 0.04761904762 | 0.04761904762 | 0             |  | inf         | #DIV/0! |
| OR51L1 | 0.04761904762 | 0.04761904762 | 0             |  | inf         | #DIV/0! |
| OR51M1 | 0.04761904762 | 0.04761904762 | 0             |  | inf         | #DIV/0! |
| OR51Q1 | 0.04761904762 | 0.04761904762 | 0             |  | inf         | #DIV/0! |
| OR51S1 | 0.04761904762 | 0.04761904762 | 0             |  | inf         | #DIV/0! |
| OR51T1 | 0.04761904762 | 0.04761904762 | 0             |  | inf         | #DIV/0! |
| OR52A1 | 0.04761904762 | 0.04761904762 | 0             |  | inf         | #DIV/0! |
| OR52A5 | 0.04761904762 | 0.04761904762 | 0             |  | inf         | #DIV/0! |
| OR52B2 | 0.04761904762 | 0.04761904762 | 0             |  | inf         | #DIV/0! |
| OR52B4 | 0.04761904762 | 0.04761904762 | 0             |  | inf         | #DIV/0! |
| OR52B6 | 0.04761904762 | 0.04761904762 | 0             |  | inf         | #DIV/0! |
| OR52D1 | 0.04761904762 | 0.04761904762 | 0             |  | inf         | #DIV/0! |
| OR52E1 | 0.04761904762 | 0.04761904762 | 0             |  | inf         | #DIV/0! |
| OR52E2 | 0.04761904762 | 0.04761904762 | 0             |  | inf         | #DIV/0! |
| OR52E4 | 0.04761904762 | 0.04761904762 | 0             |  | inf         | #DIV/0! |
| OR52E5 | 0.04761904762 | 0.04761904762 | 0             |  | inf         | #DIV/0! |
| OR52E6 | 0.04761904762 | 0.04761904762 | 0             |  | inf         | #DIV/0! |
| OR52E8 | 0.04761904762 | 0.04761904762 | 0             |  | inf         | #DIV/0! |
| OR52H1 | 0.04761904762 | 0.04761904762 | 0             |  | inf         | #DIV/0! |

|        |               |               |               |  |             |         |
|--------|---------------|---------------|---------------|--|-------------|---------|
| OR52I1 | 0.04761904762 | 0.04761904762 | 0             |  | inf         | #DIV/0! |
| OR52I2 | 0.04761904762 | 0.04761904762 | 0             |  | inf         | #DIV/0! |
| OR52J3 | 0.04761904762 | 0.04761904762 | 0             |  | inf         | #DIV/0! |
| OR52K1 | 0.04761904762 | 0.04761904762 | 0             |  | inf         | #DIV/0! |
| OR52K2 | 0.04761904762 | 0.04761904762 | 0             |  | inf         | #DIV/0! |
| OR52L1 | 0.04761904762 | 0.04761904762 | 0             |  | inf         | #DIV/0! |
| OR52M1 | 0.04761904762 | 0.04761904762 | 0             |  | inf         | #DIV/0! |
| OR52N1 | 0.04761904762 | 0.04761904762 | 0             |  | inf         | #DIV/0! |
| OR52N2 | 0.04761904762 | 0.04761904762 | 0             |  | inf         | #DIV/0! |
| OR52N4 | 0.04761904762 | 0.04761904762 | 0             |  | inf         | #DIV/0! |
| OR52N5 | 0.04761904762 | 0.04761904762 | 0             |  | inf         | #DIV/0! |
| OR52R1 | 0.04761904762 | 0.04761904762 | 0             |  | inf         | #DIV/0! |
| OR52W1 | 0.04761904762 | 0.04761904762 | 0             |  | inf         | #DIV/0! |
| OR52Z1 | 0.04761904762 | 0.04761904762 | 0             |  | inf         | #DIV/0! |
| OR56A1 | 0.04761904762 | 0.04761904762 | 0             |  | inf         | #DIV/0! |
| OR56A3 | 0.04761904762 | 0.04761904762 | 0             |  | inf         | #DIV/0! |
| OR56A4 | 0.04761904762 | 0.04761904762 | 0             |  | inf         | #DIV/0! |
| OR56A5 | 0.04761904762 | 0.04761904762 | 0             |  | inf         | #DIV/0! |
| OR56B1 | 0.04761904762 | 0.04761904762 | 0             |  | inf         | #DIV/0! |
| OR56B4 | 0.04761904762 | 0.04761904762 | 0             |  | inf         | #DIV/0! |
| OR5AC2 | 0.04761904762 | 0.04761904762 | 0.05555555556 |  | 0.7         | #DIV/0! |
| OR5C1  | 0.09523809524 | 0.09523809524 | 0.05555555556 |  | 1.473684211 | #DIV/0! |
| OR5E1P | 0.04761904762 | 0.04761904762 | 0             |  | inf         | #DIV/0! |
| OR5H1  | 0.04761904762 | 0.04761904762 | 0.05555555556 |  | 0.7         | #DIV/0! |
| OR5H14 | 0.04761904762 | 0.04761904762 | 0.05555555556 |  | 0.7         | #DIV/0! |
| OR5H15 | 0.04761904762 | 0.04761904762 | 0.05555555556 |  | 0.7         | #DIV/0! |
| OR5H2  | 0.04761904762 | 0.04761904762 | 0.05555555556 |  | 0.7         | #DIV/0! |
| OR5H6  | 0.04761904762 | 0.04761904762 | 0.05555555556 |  | 0.7         | #DIV/0! |
| OR5K1  | 0.04761904762 | 0.04761904762 | 0.05555555556 |  | 0.7         | #DIV/0! |
| OR5K2  | 0.04761904762 | 0.04761904762 | 0.05555555556 |  | 0.7         | #DIV/0! |
| OR5K3  | 0.04761904762 | 0.04761904762 | 0.05555555556 |  | 0.7         | #DIV/0! |
| OR5K4  | 0.04761904762 | 0.04761904762 | 0.05555555556 |  | 0.7         | #DIV/0! |
| OR5P2  | 0.04761904762 | 0.04761904762 | 0             |  | inf         | #DIV/0! |
| OR5P3  | 0.04761904762 | 0.04761904762 | 0             |  | inf         | #DIV/0! |
| OR6A2  | 0.04761904762 | 0.04761904762 | 0             |  | inf         | #DIV/0! |
| OR6B1  | 0.04761904762 | 0.04761904762 | 0.05555555556 |  | 0.7         | #DIV/0! |
| OR6B2  | 0             | 0             | 0.05555555556 |  | 0           | #DIV/0! |
| OR6B3  | 0             | 0             | 0.05555555556 |  | 0           | #DIV/0! |
| OR6C1  | 0.04761904762 | 0.04761904762 | 0.05555555556 |  | 0.7         | #DIV/0! |
| OR6C2  | 0.04761904762 | 0.04761904762 | 0.05555555556 |  | 0.7         | #DIV/0! |
| OR6C3  | 0.04761904762 | 0.04761904762 | 0.05555555556 |  | 0.7         | #DIV/0! |
| OR6C4  | 0.04761904762 | 0.04761904762 | 0.05555555556 |  | 0.7         | #DIV/0! |
| OR6C6  | 0.04761904762 | 0.04761904762 | 0.05555555556 |  | 0.7         | #DIV/0! |
| OR6C65 | 0.04761904762 | 0.04761904762 | 0.05555555556 |  | 0.7         | #DIV/0! |
| OR6C68 | 0.04761904762 | 0.04761904762 | 0.05555555556 |  | 0.7         | #DIV/0! |
| OR6C70 | 0.04761904762 | 0.04761904762 | 0.05555555556 |  | 0.7         | #DIV/0! |
| OR6C74 | 0.04761904762 | 0.04761904762 | 0.05555555556 |  | 0.7         | #DIV/0! |
| OR6C75 | 0.04761904762 | 0.04761904762 | 0.05555555556 |  | 0.7         | #DIV/0! |
| OR6C76 | 0.04761904762 | 0.04761904762 | 0.05555555556 |  | 0.7         | #DIV/0! |
| OR6F1  | 0.1428571429  | 0.1428571429  | 0             |  | inf         | #DIV/0! |
| OR6J1  | 0             | 0             | 0.05555555556 |  | 0           | #DIV/0! |

|         |               |               |              |  |              |         |
|---------|---------------|---------------|--------------|--|--------------|---------|
| OR6K2   | 0.1428571429  | 0.1428571429  | 0.0555555556 |  | 2.333333333  | #DIV/0! |
| OR6K3   | 0.1428571429  | 0.1428571429  | 0.0555555556 |  | 2.333333333  | #DIV/0! |
| OR6K6   | 0.1428571429  | 0.1428571429  | 0            |  | inf          | #DIV/0! |
| OR6N1   | 0.1428571429  | 0.1428571429  | 0            |  | inf          | #DIV/0! |
| OR6N2   | 0.1428571429  | 0.1428571429  | 0            |  | inf          | #DIV/0! |
| OR6P1   | 0.1428571429  | 0.1428571429  | 0.0555555556 |  | 2.333333333  | #DIV/0! |
| OR6V1   | 0.04761904762 | 0.04761904762 | 0.0555555556 |  | 0.7          | #DIV/0! |
| OR6W1   | 0.04761904762 | 0.04761904762 | 0.0555555556 |  | 0.7          | #DIV/0! |
| OR6Y1   | 0.1428571429  | 0.1428571429  | 0.0555555556 |  | 2.333333333  | #DIV/0! |
| OR7A10  | 0.1428571429  | 0.1428571429  | 0.1111111111 |  | 1.083333333  | #DIV/0! |
| OR7A17  | 0.1428571429  | 0.1428571429  | 0.1111111111 |  | 1.083333333  | #DIV/0! |
| OR7A5   | 0.1428571429  | 0.1428571429  | 0.1111111111 |  | 1.083333333  | #DIV/0! |
| OR7C1   | 0.1428571429  | 0.1428571429  | 0.1111111111 |  | 1.083333333  | #DIV/0! |
| OR7C2   | 0.1428571429  | 0.1428571429  | 0.1111111111 |  | 1.083333333  | #DIV/0! |
| OR7D2   | 0.1428571429  | 0.1428571429  | 0.0555555556 |  | 2.333333333  | #DIV/0! |
| OR7D4   | 0.1428571429  | 0.1428571429  | 0.0555555556 |  | 2.333333333  | #DIV/0! |
| OR7E12  | 0.04761904762 | 0.04761904762 | 0            |  | inf          | #DIV/0! |
| OR7E24  | 0.1428571429  | 0.1428571429  | 0.0555555556 |  | 2.333333333  | #DIV/0! |
| OR7E47  | 0.04761904762 | 0.04761904762 | 0.0555555556 |  | 0.7          | #DIV/0! |
| OR7E91  | 0             | 0             | 0.0555555556 |  | 0            | #DIV/0! |
| OR7G1   | 0.1428571429  | 0.1428571429  | 0.0555555556 |  | 2.333333333  | #DIV/0! |
| OR7G2   | 0.1428571429  | 0.1428571429  | 0.0555555556 |  | 2.333333333  | #DIV/0! |
| OR7G3   | 0.1428571429  | 0.1428571429  | 0.0555555556 |  | 2.333333333  | #DIV/0! |
| OR8S1   | 0.04761904762 | 0.04761904762 | 0.0555555556 |  | 0.7          | #DIV/0! |
| OR9A2   | 0.04761904762 | 0.04761904762 | 0.0555555556 |  | 0.7          | #DIV/0! |
| OR9A4   | 0.04761904762 | 0.04761904762 | 0.0555555556 |  | 0.7          | #DIV/0! |
| OR9K2   | 0.04761904762 | 0.04761904762 | 0.0555555556 |  | 0.7          | #DIV/0! |
| ORAI1   | 0.04761904762 | 0.04761904762 | 0.1111111111 |  | 0.325        | #DIV/0! |
| ORAI2   | 0.04761904762 | 0.04761904762 | 0.0555555556 |  | 0.7          | #DIV/0! |
| ORAI3   | 0.04761904762 | 0.04761904762 | 0            |  | inf          | #DIV/0! |
| ORC1    | 0.04761904762 | 0.04761904762 | 0.0555555556 |  | 0.7          | #DIV/0! |
| ORC2    | 0             | 0             | 0.0555555556 |  | 0            | #DIV/0! |
| ORC4    | 0             | 0             | 0.0555555556 |  | 0            | #DIV/0! |
| ORC5    | 0.09523809524 | 0.09523809524 | 0.0555555556 |  | 1.473684211  | #DIV/0! |
| ORC6    | 0.04761904762 | 0.04761904762 | 0            |  | inf          | #DIV/0! |
| ORM1    | 0.04761904762 | 0.04761904762 | 0.0555555556 |  | 0.7          | #DIV/0! |
| ORM2    | 0.04761904762 | 0.04761904762 | 0.0555555556 |  | 0.7          | #DIV/0! |
| ORMDL   | 0             | 0             | 0.0555555556 |  | 0            | #DIV/0! |
| ORMDL   | 0.04761904762 | 0.04761904762 | 0.0555555556 |  | 0.7          | #DIV/0! |
| ORMDL   | 0.09523809524 | 0.09523809524 | 0            |  | inf          | #DIV/0! |
| OS9     | 0.1428571429  | 0.1428571429  | 0.0555555556 |  | 2.333333333  | #DIV/0! |
| OSBP2   | 0.04761904762 | 0.04761904762 | 0.1111111111 |  | 0.325        | #DIV/0! |
| OSBPL10 | 0.09523809524 | 0.09523809524 | 0            |  | inf          | #DIV/0! |
| BPL10-A | 0.04761904762 | 0.04761904762 | 0            |  | inf          | #DIV/0! |
| OSBPL11 | 0.04761904762 | 0.04761904762 | 0.0555555556 |  | 0.7          | #DIV/0! |
| OSBPL1  | 0.09523809524 | 0.09523809524 | 0.0555555556 |  | 1.473684211  | #DIV/0! |
| OSBPL2  | 0.1428571429  | 0.1428571429  | 0.2222222222 |  | 0.4583333333 | #DIV/0! |
| OSBPL3  | 0.04761904762 | 0.04761904762 | 0.2222222222 |  | 0.1375       | #DIV/0! |
| OSBPL5  | 0.04761904762 | 0.04761904762 | 0            |  | inf          | #DIV/0! |
| OSBPL6  | 0             | 0             | 0.1111111111 |  | 0            | #DIV/0! |
| OSBPL7  | 0.1428571429  | 0.1428571429  | 0            |  | inf          | #DIV/0! |

|         |               |               |               |  |              |         |
|---------|---------------|---------------|---------------|--|--------------|---------|
| OSBPL8  | 0.04761904762 | 0.04761904762 | 0.1111111111  |  | 0.325        | #DIV/0! |
| OSBPL9  | 0.04761904762 | 0.04761904762 | 0.05555555556 |  | 0.7          | #DIV/0! |
| OSCAR0  | 0.09523809524 | 0.09523809524 | 0.05555555556 |  | 1.473684211  | #DIV/0! |
| OSCP1   | 0.04761904762 | 0.04761904762 | 0.05555555556 |  | 0.7          | #DIV/0! |
| OSER1   | 0.1428571429  | 0.1428571429  | 0.16666666667 |  | 0.6666666667 | #DIV/0! |
| SER1-D  | 0.1428571429  | 0.1428571429  | 0.16666666667 |  | 0.6666666667 | #DIV/0! |
| SGEPL   | 0             | 0             | 0.05555555556 |  | 0            | #DIV/0! |
| GEPL1-A | 0             | 0             | 0.05555555556 |  | 0            | #DIV/0! |
| OSGIN1  | 0.04761904762 | 0.04761904762 | 0             |  | inf          | #DIV/0! |
| OSGIN2  | 0.1904761905  | 0.1904761905  | 0.1111111111  |  | 1.529411765  | #DIV/0! |
| OSM     | 0.04761904762 | 0.04761904762 | 0.1111111111  |  | 0.325        | #DIV/0! |
| OSMR    | 0.04761904762 | 0.04761904762 | 0.05555555556 |  | 0.7          | #DIV/0! |
| SMR-AS  | 0.04761904762 | 0.04761904762 | 0.05555555556 |  | 0.7          | #DIV/0! |
| OSR1    | 0             | 0             | 0.05555555556 |  | 0            | #DIV/0! |
| OSR2    | 0.1904761905  | 0.1904761905  | 0.1111111111  |  | 1.529411765  | #DIV/0! |
| OSTC    | 0             | 0             | 0.05555555556 |  | 0            | #DIV/0! |
| OSTF1   | 0             | 0             | 0.05555555556 |  | 0            | #DIV/0! |
| OSTM1   | 0             | 0             | 0             |  |              | #DIV/0! |
| STM1-A  | 0             | 0             | 0             |  |              | #DIV/0! |
| OSTN    | 0.09523809524 | 0.09523809524 | 0.05555555556 |  | 1.473684211  | #DIV/0! |
| STN-AS  | 0.09523809524 | 0.09523809524 | 0.05555555556 |  | 1.473684211  | #DIV/0! |
| OTOA    | 0.04761904762 | 0.04761904762 | 0             |  | inf          | #DIV/0! |
| OTOAP   | 0.04761904762 | 0.04761904762 | 0             |  | inf          | #DIV/0! |
| OTOL1   | 0.1428571429  | 0.1428571429  | 0.05555555556 |  | 2.3333333333 | #DIV/0! |
| OTOP2   | 0.04761904762 | 0.04761904762 | 0             |  | inf          | #DIV/0! |
| OTOP3   | 0.04761904762 | 0.04761904762 | 0             |  | inf          | #DIV/0! |
| OTOR    | 0.1904761905  | 0.1904761905  | 0.1111111111  |  | 1.529411765  | #DIV/0! |
| OTOS    | 0.04761904762 | 0.04761904762 | 0.05555555556 |  | 0.7          | #DIV/0! |
| OTP     | 0.04761904762 | 0.04761904762 | 0             |  | inf          | #DIV/0! |
| OTUD1   | 0.09523809524 | 0.09523809524 | 0.1111111111  |  | 0.6842105263 | #DIV/0! |
| OTUD3   | 0.04761904762 | 0.04761904762 | 0.1111111111  |  | 0.325        | #DIV/0! |
| OTUD4   | 0             | 0             | 0.05555555556 |  | 0            | #DIV/0! |
| OTUD6B  | 0.1904761905  | 0.1904761905  | 0.1111111111  |  | 1.529411765  | #DIV/0! |
| UD6B-A  | 0.1904761905  | 0.1904761905  | 0.1111111111  |  | 1.529411765  | #DIV/0! |
| OTUD7B  | 0.1904761905  | 0.1904761905  | 0.1111111111  |  | 1.529411765  | #DIV/0! |
| OTULIN  | 0.04761904762 | 0.04761904762 | 0.05555555556 |  | 0.7          | #DIV/0! |
| TULIN   | 0.04761904762 | 0.04761904762 | 0.05555555556 |  | 0.7          | #DIV/0! |
| OTX1    | 0             | 0             | 0.05555555556 |  | 0            | #DIV/0! |
| OTX2    | 0.04761904762 | 0.04761904762 | 0             |  | inf          | #DIV/0! |
| TX2-AS  | 0.04761904762 | 0.04761904762 | 0             |  | inf          | #DIV/0! |
| OVAAL   | 0.1428571429  | 0.1428571429  | 0             |  | inf          | #DIV/0! |
| OVCA2   | 0             | 0             | 0.1111111111  |  | 0            | #DIV/0! |
| OVCH1   | 0.04761904762 | 0.04761904762 | 0.05555555556 |  | 0.7          | #DIV/0! |
| VCH1-A  | 0.04761904762 | 0.04761904762 | 0.05555555556 |  | 0.7          | #DIV/0! |
| OVCH2   | 0.04761904762 | 0.04761904762 | 0             |  | inf          | #DIV/0! |
| OVGP1   | 0.04761904762 | 0.04761904762 | 0             |  | inf          | #DIV/0! |
| OVOL2   | 0.1904761905  | 0.1904761905  | 0.1111111111  |  | 1.529411765  | #DIV/0! |
| OVOL3   | 0.04761904762 | 0.04761904762 | 0.05555555556 |  | 0.7          | #DIV/0! |
| OVOS    | 0.04761904762 | 0.04761904762 | 0.1111111111  |  | 0.325        | #DIV/0! |
| OVOS2   | 0.04761904762 | 0.04761904762 | 0.05555555556 |  | 0.7          | #DIV/0! |
| OXAIL   | 0             | 0             | 0.05555555556 |  | 0            | #DIV/0! |

|         |               |               |               |  |              |         |
|---------|---------------|---------------|---------------|--|--------------|---------|
| OXCT1   | 0.04761904762 | 0.04761904762 | 0.05555555556 |  | 0.7          | #DIV/0! |
| XCT1-A  | 0.04761904762 | 0.04761904762 | 0.05555555556 |  | 0.7          | #DIV/0! |
| OXCT2   | 0.04761904762 | 0.04761904762 | 0.05555555556 |  | 0.7          | #DIV/0! |
| OXCT2P  | 0.04761904762 | 0.04761904762 | 0.05555555556 |  | 0.7          | #DIV/0! |
| OXER1   | 0             | 0             | 0.05555555556 |  | 0            | #DIV/0! |
| OXLD1   | 0.04761904762 | 0.04761904762 | 0             |  | inf          | #DIV/0! |
| OXNAD1  | 0.04761904762 | 0.04761904762 | 0             |  | inf          | #DIV/0! |
| OXR1    | 0.1904761905  | 0.1904761905  | 0.1111111111  |  | 1.529411765  | #DIV/0! |
| OXSRI   | 0.04761904762 | 0.04761904762 | 0             |  | inf          | #DIV/0! |
| OXT     | 0.1904761905  | 0.1904761905  | 0.05555555556 |  | 3.294117647  | #DIV/0! |
| OXTR    | 0.04761904762 | 0.04761904762 | 0             |  | inf          | #DIV/0! |
| P2RX1   | 0             | 0             | 0.1111111111  |  | 0            | #DIV/0! |
| P2RX2   | 0.09523809524 | 0.09523809524 | 0.05555555556 |  | 1.473684211  | #DIV/0! |
| P2RX4   | 0.04761904762 | 0.04761904762 | 0.1111111111  |  | 0.325        | #DIV/0! |
| P2RX5   | 0             | 0             | 0.1111111111  |  | 0            | #DIV/0! |
| K5-TAX1 | 0             | 0             | 0.1111111111  |  | 0            | #DIV/0! |
| P2RX6   | 0.04761904762 | 0.04761904762 | 0.05555555556 |  | 0.7          | #DIV/0! |
| P2RX6P  | 0.04761904762 | 0.04761904762 | 0.05555555556 |  | 0.7          | #DIV/0! |
| P2RX7   | 0.04761904762 | 0.04761904762 | 0.1111111111  |  | 0.325        | #DIV/0! |
| P2RY1   | 0.1904761905  | 0.1904761905  | 0.1111111111  |  | 1.529411765  | #DIV/0! |
| P2RY11  | 0.1428571429  | 0.1428571429  | 0.1111111111  |  | 1.083333333  | #DIV/0! |
| P2RY12  | 0.1904761905  | 0.1904761905  | 0.1111111111  |  | 1.529411765  | #DIV/0! |
| P2RY13  | 0.1904761905  | 0.1904761905  | 0.1111111111  |  | 1.529411765  | #DIV/0! |
| P2RY14  | 0.1904761905  | 0.1904761905  | 0.1111111111  |  | 1.529411765  | #DIV/0! |
| P3H1    | 0.04761904762 | 0.04761904762 | 0.05555555556 |  | 0.7          | #DIV/0! |
| P3H2    | 0.09523809524 | 0.09523809524 | 0.1111111111  |  | 0.6842105263 | #DIV/0! |
| 3H2-AS  | 0.09523809524 | 0.09523809524 | 0.1111111111  |  | 0.6842105263 | #DIV/0! |
| P3H3    | 0.04761904762 | 0.04761904762 | 0.1111111111  |  | 0.325        | #DIV/0! |
| P3H4    | 0.09523809524 | 0.09523809524 | 0             |  | inf          | #DIV/0! |
| P3R3UR1 | 0.04761904762 | 0.04761904762 | 0.05555555556 |  | 0.7          | #DIV/0! |
| P4HA1   | 0.1904761905  | 0.1904761905  | 0.05555555556 |  | 3.294117647  | #DIV/0! |
| P4HA2   | 0.04761904762 | 0.04761904762 | 0             |  | inf          | #DIV/0! |
| 4HA2-AS | 0.04761904762 | 0.04761904762 | 0             |  | inf          | #DIV/0! |
| P4HB    | 0.04761904762 | 0.04761904762 | 0             |  | inf          | #DIV/0! |
| P4HTM   | 0.09523809524 | 0.09523809524 | 0             |  | inf          | #DIV/0! |
| PA2G4   | 0.09523809524 | 0.09523809524 | 0.05555555556 |  | 1.473684211  | #DIV/0! |
| PA2G4P  | 0.1428571429  | 0.1428571429  | 0.05555555556 |  | 2.333333333  | #DIV/0! |
| PABPC1  | 0.1904761905  | 0.1904761905  | 0.1111111111  |  | 1.529411765  | #DIV/0! |
| ABPC1I  | 0.1428571429  | 0.1428571429  | 0.1666666667  |  | 0.666666667  | #DIV/0! |
| ABPC1F  | 0             | 0             | 0.05555555556 |  | 0            | #DIV/0! |
| PABPC4  | 0.04761904762 | 0.04761904762 | 0.05555555556 |  | 0.7          | #DIV/0! |
| BPC4-A  | 0.04761904762 | 0.04761904762 | 0.05555555556 |  | 0.7          | #DIV/0! |
| ABPC4I  | 0             | 0             | 0.05555555556 |  | 0            | #DIV/0! |
| PABPN1  | 0             | 0             | 0.1111111111  |  | 0            | #DIV/0! |
| ABPN1I  | 0.1904761905  | 0.1904761905  | 0             |  | inf          | #DIV/0! |
| PACER1  | 0.1428571429  | 0.1428571429  | 0.05555555556 |  | 2.333333333  | #DIV/0! |
| PACRG   | 0             | 0             | 0.1111111111  |  | 0            | #DIV/0! |
| CRG-A   | 0             | 0             | 0.1111111111  |  | 0            | #DIV/0! |
| CRG-A   | 0             | 0             | 0.05555555556 |  | 0            | #DIV/0! |
| CRG-A   | 0             | 0             | 0.1111111111  |  | 0            | #DIV/0! |
| PACSIN  | 0.04761904762 | 0.04761904762 | 0             |  | inf          | #DIV/0! |

|         |               |               |              |  |              |         |
|---------|---------------|---------------|--------------|--|--------------|---------|
| PACSIN2 | 0             | 0             | 0.1666666667 |  | 0            | #DIV/0! |
| PACSIN3 | 0             | 0             | 0.0555555556 |  | 0            | #DIV/0! |
| PADI1   | 0.04761904762 | 0.04761904762 | 0.1111111111 |  | 0.325        | #DIV/0! |
| PADI2   | 0.04761904762 | 0.04761904762 | 0.1111111111 |  | 0.325        | #DIV/0! |
| PADI3   | 0.04761904762 | 0.04761904762 | 0.1111111111 |  | 0.325        | #DIV/0! |
| PADI4   | 0.04761904762 | 0.04761904762 | 0.1111111111 |  | 0.325        | #DIV/0! |
| PADI6   | 0.04761904762 | 0.04761904762 | 0.1111111111 |  | 0.325        | #DIV/0! |
| PAEP    | 0.04761904762 | 0.04761904762 | 0            |  | inf          | #DIV/0! |
| PAF1    | 0.04761904762 | 0.04761904762 | 0.0555555556 |  | 0.7          | #DIV/0! |
| AFAH11  | 0             | 0             | 0.1111111111 |  | 0            | #DIV/0! |
| AFAH11  | 0.04761904762 | 0.04761904762 | 0.0555555556 |  | 0.7          | #DIV/0! |
| PAFAH2  | 0.04761904762 | 0.04761904762 | 0.1111111111 |  | 0.325        | #DIV/0! |
| PAG1    | 0.1428571429  | 0.1428571429  | 0.1111111111 |  | 1.083333333  | #DIV/0! |
| PAGR1   | 0.04761904762 | 0.04761904762 | 0            |  | inf          | #DIV/0! |
| PAH     | 0.04761904762 | 0.04761904762 | 0.1111111111 |  | 0.325        | #DIV/0! |
| PAICS   | 0.1904761905  | 0.1904761905  | 0.0555555556 |  | 3.294117647  | #DIV/0! |
| PAIP1   | 0.04761904762 | 0.04761904762 | 0.0555555556 |  | 0.7          | #DIV/0! |
| PAIP2   | 0.04761904762 | 0.04761904762 | 0            |  | inf          | #DIV/0! |
| PAIP2B  | 0             | 0             | 0.0555555556 |  | 0            | #DIV/0! |
| PAK2    | 0.1428571429  | 0.1428571429  | 0.0555555556 |  | 2.333333333  | #DIV/0! |
| PAK4    | 0.04761904762 | 0.04761904762 | 0.0555555556 |  | 0.7          | #DIV/0! |
| PAK5    | 0.1904761905  | 0.1904761905  | 0.1111111111 |  | 1.529411765  | #DIV/0! |
| PALB2   | 0.04761904762 | 0.04761904762 | 0            |  | inf          | #DIV/0! |
| PALD1   | 0.09523809524 | 0.09523809524 | 0            |  | inf          | #DIV/0! |
| PALLD   | 0             | 0             | 0.0555555556 |  | 0            | #DIV/0! |
| PALM    | 0.09523809524 | 0.09523809524 | 0.1111111111 |  | 0.6842105263 | #DIV/0! |
| PALM2   | 0.04761904762 | 0.04761904762 | 0.0555555556 |  | 0.7          | #DIV/0! |
| M2-AK   | 0.04761904762 | 0.04761904762 | 0.0555555556 |  | 0.7          | #DIV/0! |
| PALM3   | 0.1428571429  | 0.1428571429  | 0.1111111111 |  | 1.083333333  | #DIV/0! |
| PALMD   | 0.04761904762 | 0.04761904762 | 0.0555555556 |  | 0.7          | #DIV/0! |
| PAM     | 0.04761904762 | 0.04761904762 | 0            |  | inf          | #DIV/0! |
| PAN2    | 0.1428571429  | 0.1428571429  | 0.0555555556 |  | 2.333333333  | #DIV/0! |
| PANCR   | 0             | 0             | 0.0555555556 |  | 0            | #DIV/0! |
| PANDAI  | 0.04761904762 | 0.04761904762 | 0.0555555556 |  | 0.7          | #DIV/0! |
| PANK1   | 0.1428571429  | 0.1428571429  | 0.1111111111 |  | 1.083333333  | #DIV/0! |
| PANK2   | 0.1904761905  | 0.1904761905  | 0.0555555556 |  | 3.294117647  | #DIV/0! |
| PANK3   | 0             | 0             | 0.0555555556 |  | 0            | #DIV/0! |
| PANK4   | 0             | 0             | 0.1111111111 |  | 0            | #DIV/0! |
| PANO1   | 0.04761904762 | 0.04761904762 | 0            |  | inf          | #DIV/0! |
| PANTR1  | 0             | 0             | 0.0555555556 |  | 0            | #DIV/0! |
| PANX2   | 0             | 0             | 0.1111111111 |  | 0            | #DIV/0! |
| PAOX    | 0.1904761905  | 0.1904761905  | 0            |  | inf          | #DIV/0! |
| PAPLN   | 0.09523809524 | 0.09523809524 | 0            |  | inf          | #DIV/0! |
| PAPOLF  | 0.04761904762 | 0.04761904762 | 0.1666666667 |  | 0.2          | #DIV/0! |
| PAPOLC  | 0.09523809524 | 0.09523809524 | 0.0555555556 |  | 1.473684211  | #DIV/0! |
| PAPPA   | 0.04761904762 | 0.04761904762 | 0.0555555556 |  | 0.7          | #DIV/0! |
| APPA-AS | 0.04761904762 | 0.04761904762 | 0.0555555556 |  | 0.7          | #DIV/0! |
| PAPPA2  | 0.1428571429  | 0.1428571429  | 0            |  | inf          | #DIV/0! |
| PAPSS1  | 0             | 0             | 0.0555555556 |  | 0            | #DIV/0! |
| PAPSS2  | 0.1428571429  | 0.1428571429  | 0.1666666667 |  | 0.6666666667 | #DIV/0! |
| PAQR3   | 0.04761904762 | 0.04761904762 | 0.0555555556 |  | 0.7          | #DIV/0! |

|           |               |               |               |  |              |         |
|-----------|---------------|---------------|---------------|--|--------------|---------|
| PAQR4     | 0.04761904762 | 0.04761904762 | 0.1111111111  |  | 0.325        | #DIV/0! |
| PAQR5     | 0.04761904762 | 0.04761904762 | 0.05555555556 |  | 0.7          | #DIV/0! |
| PAQR7     | 0.04761904762 | 0.04761904762 | 0.1111111111  |  | 0.325        | #DIV/0! |
| PAQR8     | 0.04761904762 | 0.04761904762 | 0             |  | inf          | #DIV/0! |
| PAQR9     | 0.1428571429  | 0.1428571429  | 0.05555555556 |  | 2.333333333  | #DIV/0! |
| PAQR9-AS  | 0.1428571429  | 0.1428571429  | 0.05555555556 |  | 2.333333333  | #DIV/0! |
| PARALI    | 0.1904761905  | 0.1904761905  | 0.1111111111  |  | 1.529411765  | #DIV/0! |
| PARD3     | 0.09523809524 | 0.09523809524 | 0.2222222222  |  | 0.2894736842 | #DIV/0! |
| PARD3-AS  | 0.09523809524 | 0.09523809524 | 0.1666666667  |  | 0.4210526316 | #DIV/0! |
| PARD3B    | 0             | 0             | 0.05555555556 |  | 0            | #DIV/0! |
| PARD6A    | 0.1428571429  | 0.1428571429  | 0.05555555556 |  | 2.333333333  | #DIV/0! |
| PARD6B    | 0.09523809524 | 0.09523809524 | 0.1666666667  |  | 0.4210526316 | #DIV/0! |
| PARD6C    | 0.04761904762 | 0.04761904762 | 0.05555555556 |  | 0.7          | #DIV/0! |
| PARD6G-A  | 0.04761904762 | 0.04761904762 | 0.05555555556 |  | 0.7          | #DIV/0! |
| PARG      | 0.04761904762 | 0.04761904762 | 0.05555555556 |  | 0.7          | #DIV/0! |
| PARGPI    | 0.04761904762 | 0.04761904762 | 0.05555555556 |  | 0.7          | #DIV/0! |
| PARGPI-AG | 0.04761904762 | 0.04761904762 | 0.05555555556 |  | 0.7          | #DIV/0! |
| PARK7     | 0             | 0             | 0.05555555556 |  | 0            | #DIV/0! |
| PARL      | 0.1904761905  | 0.1904761905  | 0.05555555556 |  | 3.294117647  | #DIV/0! |
| PARMI     | 0.09523809524 | 0.09523809524 | 0.05555555556 |  | 1.473684211  | #DIV/0! |
| PARN      | 0.04761904762 | 0.04761904762 | 0             |  | inf          | #DIV/0! |
| PARP1     | 0.1904761905  | 0.1904761905  | 0             |  | inf          | #DIV/0! |
| PARP10    | 0.04761904762 | 0.04761904762 | 0.1666666667  |  | 0.2          | #DIV/0! |
| PARP11    | 0.04761904762 | 0.04761904762 | 0.1111111111  |  | 0.325        | #DIV/0! |
| PARP12    | 0.04761904762 | 0.04761904762 | 0.05555555556 |  | 0.7          | #DIV/0! |
| PARP14    | 0.09523809524 | 0.09523809524 | 0.05555555556 |  | 1.473684211  | #DIV/0! |
| PARP15    | 0.09523809524 | 0.09523809524 | 0.05555555556 |  | 1.473684211  | #DIV/0! |
| PARP16    | 0.04761904762 | 0.04761904762 | 0.05555555556 |  | 0.7          | #DIV/0! |
| PARP2     | 0.04761904762 | 0.04761904762 | 0             |  | inf          | #DIV/0! |
| PARP3     | 0.04761904762 | 0.04761904762 | 0             |  | inf          | #DIV/0! |
| PARP6     | 0.04761904762 | 0.04761904762 | 0.05555555556 |  | 0.7          | #DIV/0! |
| PARP8     | 0.04761904762 | 0.04761904762 | 0.05555555556 |  | 0.7          | #DIV/0! |
| PARP9     | 0.09523809524 | 0.09523809524 | 0.05555555556 |  | 1.473684211  | #DIV/0! |
| PARPBF    | 0.04761904762 | 0.04761904762 | 0.05555555556 |  | 0.7          | #DIV/0! |
| PARS2     | 0.04761904762 | 0.04761904762 | 0.05555555556 |  | 0.7          | #DIV/0! |
| PART1     | 0.04761904762 | 0.04761904762 | 0             |  | inf          | #DIV/0! |
| PARTIC    | 0             | 0             | 0.05555555556 |  | 0            | #DIV/0! |
| PARVB     | 0             | 0             | 0.1666666667  |  | 0            | #DIV/0! |
| PARVG     | 0             | 0             | 0.1666666667  |  | 0            | #DIV/0! |
| PASK      | 0             | 0             | 0.05555555556 |  | 0            | #DIV/0! |
| PATJ      | 0.04761904762 | 0.04761904762 | 0.05555555556 |  | 0.7          | #DIV/0! |
| PATZ1     | 0.04761904762 | 0.04761904762 | 0.1111111111  |  | 0.325        | #DIV/0! |
| PAWR      | 0.04761904762 | 0.04761904762 | 0.05555555556 |  | 0.7          | #DIV/0! |
| PAX1      | 0.1904761905  | 0.1904761905  | 0.05555555556 |  | 3.294117647  | #DIV/0! |
| PAX2      | 0.1428571429  | 0.1428571429  | 0             |  | inf          | #DIV/0! |
| PAX3      | 0             | 0             | 0.05555555556 |  | 0            | #DIV/0! |
| PAX4      | 0.04761904762 | 0.04761904762 | 0.05555555556 |  | 0.7          | #DIV/0! |
| PAX5      | 0.09523809524 | 0.09523809524 | 0.05555555556 |  | 1.473684211  | #DIV/0! |
| PAX7      | 0.04761904762 | 0.04761904762 | 0.05555555556 |  | 0.7          | #DIV/0! |
| PAX8      | 0             | 0             | 0.05555555556 |  | 0            | #DIV/0! |
| PAX8-AS   | 0             | 0             | 0.05555555556 |  | 0            | #DIV/0! |



|        |               |               |              |  |              |         |
|--------|---------------|---------------|--------------|--|--------------|---------|
| PAXBPI | 0.04761904762 | 0.04761904762 | 0.1111111111 |  | 0.325        | #DIV/0! |
| XBPI-A | 0.04761904762 | 0.04761904762 | 0.1111111111 |  | 0.325        | #DIV/0! |
| PAXIP1 | 0.1428571429  | 0.1428571429  | 0.0555555556 |  | 2.333333333  | #DIV/0! |
| XIP1-A | 0.1428571429  | 0.1428571429  | 0.0555555556 |  | 2.333333333  | #DIV/0! |
| XIP1-A | 0.1428571429  | 0.1428571429  | 0.0555555556 |  | 2.333333333  | #DIV/0! |
| PAXX   | 0.1428571429  | 0.1428571429  | 0.0555555556 |  | 2.333333333  | #DIV/0! |
| PBK    | 0.04761904762 | 0.04761904762 | 0.1111111111 |  | 0.325        | #DIV/0! |
| PBLD   | 0.1904761905  | 0.1904761905  | 0.0555555556 |  | 3.294117647  | #DIV/0! |
| PBRM1  | 0.04761904762 | 0.04761904762 | 0            |  | inf          | #DIV/0! |
| PBX1   | 0.1428571429  | 0.1428571429  | 0            |  | inf          | #DIV/0! |
| PBX2   | 0.04761904762 | 0.04761904762 | 0            |  | inf          | #DIV/0! |
| PBX3   | 0.09523809524 | 0.09523809524 | 0.0555555556 |  | 1.473684211  | #DIV/0! |
| PBX4   | 0.1428571429  | 0.1428571429  | 0.1111111111 |  | 1.083333333  | #DIV/0! |
| PBXIP1 | 0.1904761905  | 0.1904761905  | 0.1111111111 |  | 1.529411765  | #DIV/0! |
| PCA3   | 0             | 0             | 0.0555555556 |  | 0            | #DIV/0! |
| PCARE  | 0             | 0             | 0.0555555556 |  | 0            | #DIV/0! |
| PCAT1  | 0.09523809524 | 0.09523809524 | 0.1111111111 |  | 0.6842105263 | #DIV/0! |
| PCAT14 | 0             | 0             | 0.0555555556 |  | 0            | #DIV/0! |
| PCAT18 | 0.09523809524 | 0.09523809524 | 0.0555555556 |  | 1.473684211  | #DIV/0! |
| PCAT19 | 0.04761904762 | 0.04761904762 | 0.0555555556 |  | 0.7          | #DIV/0! |
| PCAT2  | 0.09523809524 | 0.09523809524 | 0.1111111111 |  | 0.6842105263 | #DIV/0! |
| PCAT29 | 0.04761904762 | 0.04761904762 | 0.0555555556 |  | 0.7          | #DIV/0! |
| PCAT4  | 0.04761904762 | 0.04761904762 | 0.0555555556 |  | 0.7          | #DIV/0! |
| PCAT5  | 0.09523809524 | 0.09523809524 | 0.1666666667 |  | 0.4210526316 | #DIV/0! |
| PCAT6  | 0.1428571429  | 0.1428571429  | 0            |  | inf          | #DIV/0! |
| PCAT7  | 0.04761904762 | 0.04761904762 | 0.0555555556 |  | 0.7          | #DIV/0! |
| PCBD1  | 0.09523809524 | 0.09523809524 | 0            |  | inf          | #DIV/0! |
| PCBD2  | 0.04761904762 | 0.04761904762 | 0            |  | inf          | #DIV/0! |
| PCBP1  | 0             | 0             | 0.0555555556 |  | 0            | #DIV/0! |
| CBP1-A | 0             | 0             | 0.0555555556 |  | 0            | #DIV/0! |
| PCBP2  | 0.04761904762 | 0.04761904762 | 0.0555555556 |  | 0.7          | #DIV/0! |
| CBP2-O | 0.04761904762 | 0.04761904762 | 0.0555555556 |  | 0.7          | #DIV/0! |
| PCBP3  | 0.04761904762 | 0.04761904762 | 0.1111111111 |  | 0.325        | #DIV/0! |
| PCBP4  | 0.04761904762 | 0.04761904762 | 0            |  | inf          | #DIV/0! |
| PCCB   | 0.1904761905  | 0.1904761905  | 0.0555555556 |  | 3.294117647  | #DIV/0! |
| PCDH1  | 0.04761904762 | 0.04761904762 | 0            |  | inf          | #DIV/0! |
| PCDH10 | 0             | 0             | 0.0555555556 |  | 0            | #DIV/0! |
| PCDH12 | 0.04761904762 | 0.04761904762 | 0            |  | inf          | #DIV/0! |
| PCDH15 | 0.09523809524 | 0.09523809524 | 0.0555555556 |  | 1.473684211  | #DIV/0! |
| PCDH18 | 0             | 0             | 0.0555555556 |  | 0            | #DIV/0! |
| PCDHA1 | 0.04761904762 | 0.04761904762 | 0            |  | inf          | #DIV/0! |
| CDHA1  | 0.04761904762 | 0.04761904762 | 0            |  | inf          | #DIV/0! |
| CDHA1  | 0.04761904762 | 0.04761904762 | 0            |  | inf          | #DIV/0! |
| CDHA1  | 0.04761904762 | 0.04761904762 | 0            |  | inf          | #DIV/0! |
| CDHA1  | 0.04761904762 | 0.04761904762 | 0            |  | inf          | #DIV/0! |
| PCDHA2 | 0.04761904762 | 0.04761904762 | 0            |  | inf          | #DIV/0! |
| PCDHA3 | 0.04761904762 | 0.04761904762 | 0            |  | inf          | #DIV/0! |
| PCDHA4 | 0.04761904762 | 0.04761904762 | 0            |  | inf          | #DIV/0! |
| PCDHA5 | 0.04761904762 | 0.04761904762 | 0            |  | inf          | #DIV/0! |
| PCDHA6 | 0.04761904762 | 0.04761904762 | 0            |  | inf          | #DIV/0! |
| PCDHA7 | 0.04761904762 | 0.04761904762 | 0            |  | inf          | #DIV/0! |



|          |               |               |              |  |              |         |
|----------|---------------|---------------|--------------|--|--------------|---------|
| PCGF2    | 0.04761904762 | 0.04761904762 | 0            |  | inf          | #DIV/0! |
| PCGF3    | 0.04761904762 | 0.04761904762 | 0            |  | inf          | #DIV/0! |
| PCGF5    | 0.1428571429  | 0.1428571429  | 0.1111111111 |  | 1.083333333  | #DIV/0! |
| PCGF6    | 0.1428571429  | 0.1428571429  | 0.0555555556 |  | 2.333333333  | #DIV/0! |
| PCIF1    | 0.1428571429  | 0.1428571429  | 0.1666666667 |  | 0.6666666667 | #DIV/0! |
| PCK1     | 0.1428571429  | 0.1428571429  | 0.2222222222 |  | 0.4583333333 | #DIV/0! |
| PCLAF    | 0.04761904762 | 0.04761904762 | 0.0555555556 |  | 0.7          | #DIV/0! |
| PCLO     | 0.04761904762 | 0.04761904762 | 0.1111111111 |  | 0.325        | #DIV/0! |
| PCM1     | 0.09523809524 | 0.09523809524 | 0.1111111111 |  | 0.6842105263 | #DIV/0! |
| PCMT1    | 0             | 0             | 0            |  |              | #DIV/0! |
| PCMTD1   | 0.09523809524 | 0.09523809524 | 0.1111111111 |  | 0.6842105263 | #DIV/0! |
| PCMTD2   | 0.1428571429  | 0.1428571429  | 0.2222222222 |  | 0.4583333333 | #DIV/0! |
| PCNA     | 0.1904761905  | 0.1904761905  | 0.0555555556 |  | 3.294117647  | #DIV/0! |
| CNA-AS   | 0.1904761905  | 0.1904761905  | 0.0555555556 |  | 3.294117647  | #DIV/0! |
| PCNAP1   | 0             | 0             | 0.0555555556 |  | 0            | #DIV/0! |
| PCNP     | 0.09523809524 | 0.09523809524 | 0.0555555556 |  | 1.473684211  | #DIV/0! |
| PCNT     | 0.04761904762 | 0.04761904762 | 0.1111111111 |  | 0.325        | #DIV/0! |
| PCNX2    | 0.1428571429  | 0.1428571429  | 0            |  | inf          | #DIV/0! |
| PCOLCB   | 0.04761904762 | 0.04761904762 | 0.0555555556 |  | 0.7          | #DIV/0! |
| COLCE-A  | 0.04761904762 | 0.04761904762 | 0.0555555556 |  | 0.7          | #DIV/0! |
| COLCE    | 0.1428571429  | 0.1428571429  | 0.0555555556 |  | 2.333333333  | #DIV/0! |
| PCP2     | 0.1428571429  | 0.1428571429  | 0.0555555556 |  | 2.333333333  | #DIV/0! |
| PCP4     | 0.04761904762 | 0.04761904762 | 0.0555555556 |  | 0.7          | #DIV/0! |
| PCP4L1   | 0.1428571429  | 0.1428571429  | 0            |  | inf          | #DIV/0! |
| PCSK1    | 0.04761904762 | 0.04761904762 | 0            |  | inf          | #DIV/0! |
| PCSK2    | 0.1904761905  | 0.1904761905  | 0.1111111111 |  | 1.529411765  | #DIV/0! |
| PCSK4    | 0.09523809524 | 0.09523809524 | 0.1111111111 |  | 0.6842105263 | #DIV/0! |
| PCSK5    | 0             | 0             | 0.0555555556 |  | 0            | #DIV/0! |
| PCSK6    | 0.04761904762 | 0.04761904762 | 0.0555555556 |  | 0.7          | #DIV/0! |
| CSK6-AS  | 0.04761904762 | 0.04761904762 | 0.0555555556 |  | 0.7          | #DIV/0! |
| PCSK9    | 0.04761904762 | 0.04761904762 | 0.0555555556 |  | 0.7          | #DIV/0! |
| PCTP     | 0.09523809524 | 0.09523809524 | 0            |  | inf          | #DIV/0! |
| PCYOX1   | 0             | 0             | 0.0555555556 |  | 0            | #DIV/0! |
| PCYT1A   | 0.1428571429  | 0.1428571429  | 0.0555555556 |  | 2.333333333  | #DIV/0! |
| PCYT2    | 0.04761904762 | 0.04761904762 | 0            |  | inf          | #DIV/0! |
| PDAP1    | 0.04761904762 | 0.04761904762 | 0.0555555556 |  | 0.7          | #DIV/0! |
| PDC      | 0.1428571429  | 0.1428571429  | 0.0555555556 |  | 2.333333333  | #DIV/0! |
| PDCD1    | 0             | 0             | 0.0555555556 |  | 0            | #DIV/0! |
| PDCD10   | 0.1428571429  | 0.1428571429  | 0.0555555556 |  | 2.333333333  | #DIV/0! |
| PDCD11   | 0.1428571429  | 0.1428571429  | 0.0555555556 |  | 2.333333333  | #DIV/0! |
| PDCD1LC  | 0.04761904762 | 0.04761904762 | 0.0555555556 |  | 0.7          | #DIV/0! |
| PDCD21   | 0.04761904762 | 0.04761904762 | 0.0555555556 |  | 0.7          | #DIV/0! |
| PDCD4    | 0.1428571429  | 0.1428571429  | 0.0555555556 |  | 2.333333333  | #DIV/0! |
| PDCD4-AS | 0.1428571429  | 0.1428571429  | 0.0555555556 |  | 2.333333333  | #DIV/0! |
| PDCD5    | 0.04761904762 | 0.04761904762 | 0.0555555556 |  | 0.7          | #DIV/0! |
| PDCD6    | 0             | 0             | 0.0555555556 |  | 0            | #DIV/0! |
| PDCD6II  | 0.09523809524 | 0.09523809524 | 0            |  | inf          | #DIV/0! |
| PDCD7    | 0.04761904762 | 0.04761904762 | 0.0555555556 |  | 0.7          | #DIV/0! |
| PDCL     | 0.09523809524 | 0.09523809524 | 0.0555555556 |  | 1.473684211  | #DIV/0! |
| PDCL2    | 0.1904761905  | 0.1904761905  | 0.0555555556 |  | 3.294117647  | #DIV/0! |
| PDCL3    | 0             | 0             | 0.0555555556 |  | 0            | #DIV/0! |

|         |               |               |               |  |              |         |
|---------|---------------|---------------|---------------|--|--------------|---------|
| PCL3P   | 0.09523809524 | 0.09523809524 | 0.05555555556 |  | 1.473684211  | #DIV/0! |
| PDE11A  | 0             | 0             | 0.1111111111  |  | 0            | #DIV/0! |
| PDE12   | 0.09523809524 | 0.09523809524 | 0             |  | inf          | #DIV/0! |
| PDE1A   | 0             | 0             | 0.05555555556 |  | 0            | #DIV/0! |
| PDE1B   | 0.04761904762 | 0.04761904762 | 0.05555555556 |  | 0.7          | #DIV/0! |
| PDE1C   | 0.09523809524 | 0.09523809524 | 0.1111111111  |  | 0.6842105263 | #DIV/0! |
| PDE3A   | 0.04761904762 | 0.04761904762 | 0.1111111111  |  | 0.325        | #DIV/0! |
| PDE4A   | 0.1428571429  | 0.1428571429  | 0.1111111111  |  | 1.083333333  | #DIV/0! |
| PDE4B   | 0.04761904762 | 0.04761904762 | 0.05555555556 |  | 0.7          | #DIV/0! |
| PDE4C   | 0.1428571429  | 0.1428571429  | 0.1111111111  |  | 1.083333333  | #DIV/0! |
| PDE4D   | 0.04761904762 | 0.04761904762 | 0.05555555556 |  | 0.7          | #DIV/0! |
| PDE4DI  | 0.09523809524 | 0.09523809524 | 0.05555555556 |  | 1.473684211  | #DIV/0! |
| PDE4DIP | 0.1428571429  | 0.1428571429  | 0.05555555556 |  | 2.333333333  | #DIV/0! |
| PDE5A   | 0             | 0             | 0.05555555556 |  | 0            | #DIV/0! |
| PDE6B   | 0.04761904762 | 0.04761904762 | 0             |  | inf          | #DIV/0! |
| PDE6C   | 0.1428571429  | 0.1428571429  | 0             |  | inf          | #DIV/0! |
| PDE6D   | 0             | 0             | 0.05555555556 |  | 0            | #DIV/0! |
| PDE6G   | 0.04761904762 | 0.04761904762 | 0             |  | inf          | #DIV/0! |
| PDE6H   | 0.04761904762 | 0.04761904762 | 0.1111111111  |  | 0.325        | #DIV/0! |
| PDE7A   | 0.1428571429  | 0.1428571429  | 0.1666666667  |  | 0.666666667  | #DIV/0! |
| PDE8A   | 0.04761904762 | 0.04761904762 | 0.05555555556 |  | 0.7          | #DIV/0! |
| PDE8B   | 0.04761904762 | 0.04761904762 | 0             |  | inf          | #DIV/0! |
| PDE9A   | 0.04761904762 | 0.04761904762 | 0.1666666667  |  | 0.2          | #DIV/0! |
| PDF     | 0.1428571429  | 0.1428571429  | 0.05555555556 |  | 2.333333333  | #DIV/0! |
| PDGFA   | 0.04761904762 | 0.04761904762 | 0.1666666667  |  | 0.2          | #DIV/0! |
| PDGFB   | 0.04761904762 | 0.04761904762 | 0.1111111111  |  | 0.325        | #DIV/0! |
| PDGFC   | 0             | 0             | 0.1111111111  |  | 0            | #DIV/0! |
| PDGFRA  | 0.2380952381  | 0.2380952381  | 0.05555555556 |  | 4.375        | #DIV/0! |
| PDGFR1  | 0.09523809524 | 0.09523809524 | 0.1111111111  |  | 0.6842105263 | #DIV/0! |
| PDHA2   | 0             | 0             | 0.05555555556 |  | 0            | #DIV/0! |
| PDHB    | 0.04761904762 | 0.04761904762 | 0             |  | inf          | #DIV/0! |
| PDIA2   | 0.04761904762 | 0.04761904762 | 0.2222222222  |  | 0.1375       | #DIV/0! |
| PDIA3P  | 0.1428571429  | 0.1428571429  | 0.05555555556 |  | 2.333333333  | #DIV/0! |
| PDIA4   | 0.09523809524 | 0.09523809524 | 0.05555555556 |  | 1.473684211  | #DIV/0! |
| PDIA5   | 0.04761904762 | 0.04761904762 | 0.05555555556 |  | 0.7          | #DIV/0! |
| PDIA6   | 0             | 0             | 0.05555555556 |  | 0            | #DIV/0! |
| PDIK1L  | 0.04761904762 | 0.04761904762 | 0.1111111111  |  | 0.325        | #DIV/0! |
| PDILT   | 0.04761904762 | 0.04761904762 | 0             |  | inf          | #DIV/0! |
| PDK1    | 0             | 0             | 0.1111111111  |  | 0            | #DIV/0! |
| PDK2    | 0.09523809524 | 0.09523809524 | 0             |  | inf          | #DIV/0! |
| PDK4    | 0.04761904762 | 0.04761904762 | 0.1111111111  |  | 0.325        | #DIV/0! |
| PDLIM1  | 0.1428571429  | 0.1428571429  | 0             |  | inf          | #DIV/0! |
| PDLIM2  | 0.09523809524 | 0.09523809524 | 0.1111111111  |  | 0.6842105263 | #DIV/0! |
| PDLIM3  | 0             | 0             | 0.05555555556 |  | 0            | #DIV/0! |
| PDLIM4  | 0.04761904762 | 0.04761904762 | 0             |  | inf          | #DIV/0! |
| PDLIM5  | 0             | 0             | 0.05555555556 |  | 0            | #DIV/0! |
| PDLIM7  | 0.09523809524 | 0.09523809524 | 0.05555555556 |  | 1.473684211  | #DIV/0! |
| PDP1    | 0.1904761905  | 0.1904761905  | 0.1111111111  |  | 1.529411765  | #DIV/0! |
| PDP2    | 0.09523809524 | 0.09523809524 | 0.05555555556 |  | 1.473684211  | #DIV/0! |
| PDPK1   | 0.04761904762 | 0.04761904762 | 0.1111111111  |  | 0.325        | #DIV/0! |
| PDPN    | 0.04761904762 | 0.04761904762 | 0.1111111111  |  | 0.325        | #DIV/0! |

|         |               |               |              |  |              |         |
|---------|---------------|---------------|--------------|--|--------------|---------|
| PDPR    | 0.1428571429  | 0.1428571429  | 0.0555555556 |  | 2.333333333  | #DIV/0! |
| PDRG1   | 0.09523809524 | 0.09523809524 | 0.1111111111 |  | 0.6842105263 | #DIV/0! |
| PDS5A   | 0.1904761905  | 0.1904761905  | 0.0555555556 |  | 3.294117647  | #DIV/0! |
| PDSS1   | 0.09523809524 | 0.09523809524 | 0.1111111111 |  | 0.6842105263 | #DIV/0! |
| PDSS2   | 0             | 0             | 0            |  |              | #DIV/0! |
| PDXDC1  | 0.04761904762 | 0.04761904762 | 0            |  | inf          | #DIV/0! |
| C2P-NPI | 0.1428571429  | 0.1428571429  | 0.0555555556 |  | 2.333333333  | #DIV/0! |
| PDXK    | 0.04761904762 | 0.04761904762 | 0.1111111111 |  | 0.325        | #DIV/0! |
| PDXP    | 0             | 0             | 0.1111111111 |  | 0            | #DIV/0! |
| PDYN    | 0.1904761905  | 0.1904761905  | 0.1111111111 |  | 1.529411765  | #DIV/0! |
| DYN-AS  | 0.1904761905  | 0.1904761905  | 0.1111111111 |  | 1.529411765  | #DIV/0! |
| PDZD2   | 0.04761904762 | 0.04761904762 | 0.0555555556 |  | 0.7          | #DIV/0! |
| PDZD7   | 0.1428571429  | 0.1428571429  | 0            |  | inf          | #DIV/0! |
| PDZD8   | 0.2380952381  | 0.2380952381  | 0            |  | inf          | #DIV/0! |
| PDZD9   | 0.04761904762 | 0.04761904762 | 0            |  | inf          | #DIV/0! |
| PDZK1   | 0.1428571429  | 0.1428571429  | 0.0555555556 |  | 2.333333333  | #DIV/0! |
| DZK1IP  | 0.04761904762 | 0.04761904762 | 0.0555555556 |  | 0.7          | #DIV/0! |
| PDZK1P  | 0.1428571429  | 0.1428571429  | 0.0555555556 |  | 2.333333333  | #DIV/0! |
| PDZRN3  | 0.04761904762 | 0.04761904762 | 0            |  | inf          | #DIV/0! |
| ZRN3-A  | 0.04761904762 | 0.04761904762 | 0            |  | inf          | #DIV/0! |
| PDZRN4  | 0.04761904762 | 0.04761904762 | 0.0555555556 |  | 0.7          | #DIV/0! |
| PEA15   | 0.1428571429  | 0.1428571429  | 0            |  | inf          | #DIV/0! |
| PEAK1   | 0.04761904762 | 0.04761904762 | 0.0555555556 |  | 0.7          | #DIV/0! |
| PEAK3   | 0.09523809524 | 0.09523809524 | 0.1111111111 |  | 0.6842105263 | #DIV/0! |
| PEAR1   | 0.1428571429  | 0.1428571429  | 0.0555555556 |  | 2.333333333  | #DIV/0! |
| PEBP1   | 0             | 0             | 0.0555555556 |  | 0            | #DIV/0! |
| PEBP4   | 0.04761904762 | 0.04761904762 | 0.1111111111 |  | 0.325        | #DIV/0! |
| PECAM1  | 0.04761904762 | 0.04761904762 | 0            |  | inf          | #DIV/0! |
| PECR    | 0             | 0             | 0.0555555556 |  | 0            | #DIV/0! |
| PEG10   | 0.04761904762 | 0.04761904762 | 0.1111111111 |  | 0.325        | #DIV/0! |
| PEG13   | 0.04761904762 | 0.04761904762 | 0.1111111111 |  | 0.325        | #DIV/0! |
| PEG3    | 0.1428571429  | 0.1428571429  | 0.0555555556 |  | 2.333333333  | #DIV/0! |
| EG3-AS  | 0.1428571429  | 0.1428571429  | 0.0555555556 |  | 2.333333333  | #DIV/0! |
| PELI1   | 0             | 0             | 0.0555555556 |  | 0            | #DIV/0! |
| PELI2   | 0.04761904762 | 0.04761904762 | 0            |  | inf          | #DIV/0! |
| PELO    | 0.04761904762 | 0.04761904762 | 0.0555555556 |  | 0.7          | #DIV/0! |
| PELP1   | 0             | 0             | 0.1111111111 |  | 0            | #DIV/0! |
| PEMT    | 0.04761904762 | 0.04761904762 | 0.1111111111 |  | 0.325        | #DIV/0! |
| PENK    | 0.1428571429  | 0.1428571429  | 0.1111111111 |  | 1.083333333  | #DIV/0! |
| PEPD    | 0.04761904762 | 0.04761904762 | 0.0555555556 |  | 0.7          | #DIV/0! |
| PER1    | 0             | 0             | 0.0555555556 |  | 0            | #DIV/0! |
| PER2    | 0             | 0             | 0.0555555556 |  | 0            | #DIV/0! |
| PER3    | 0             | 0             | 0.0555555556 |  | 0            | #DIV/0! |
| PER4    | 0.04761904762 | 0.04761904762 | 0.2222222222 |  | 0.1375       | #DIV/0! |
| PERM1   | 0             | 0             | 0.1111111111 |  | 0            | #DIV/0! |
| PES1    | 0.04761904762 | 0.04761904762 | 0.1111111111 |  | 0.325        | #DIV/0! |
| PET100  | 0.1428571429  | 0.1428571429  | 0.0555555556 |  | 2.333333333  | #DIV/0! |
| PET117  | 0.1904761905  | 0.1904761905  | 0.0555555556 |  | 3.294117647  | #DIV/0! |
| PEX1    | 0.04761904762 | 0.04761904762 | 0.1111111111 |  | 0.325        | #DIV/0! |
| PEX10   | 0             | 0             | 0.1111111111 |  | 0            | #DIV/0! |
| PEX11A  | 0.04761904762 | 0.04761904762 | 0.0555555556 |  | 0.7          | #DIV/0! |

|         |               |               |               |  |              |         |
|---------|---------------|---------------|---------------|--|--------------|---------|
| PEX11G  | 0.1428571429  | 0.1428571429  | 0.05555555556 |  | 2.333333333  | #DIV/0! |
| PEX12   | 0.04761904762 | 0.04761904762 | 0             |  | inf          | #DIV/0! |
| PEX13   | 0.09523809524 | 0.09523809524 | 0.05555555556 |  | 1.473684211  | #DIV/0! |
| PEX14   | 0.04761904762 | 0.04761904762 | 0.1111111111  |  | 0.325        | #DIV/0! |
| PEX19   | 0.1428571429  | 0.1428571429  | 0             |  | inf          | #DIV/0! |
| PEX2    | 0.1904761905  | 0.1904761905  | 0.1111111111  |  | 1.529411765  | #DIV/0! |
| PEX26   | 0.04761904762 | 0.04761904762 | 0.05555555556 |  | 0.7          | #DIV/0! |
| PEX5    | 0.04761904762 | 0.04761904762 | 0.1111111111  |  | 0.325        | #DIV/0! |
| PEX5L   | 0.1904761905  | 0.1904761905  | 0.05555555556 |  | 3.294117647  | #DIV/0! |
| EX5L-AS | 0.1904761905  | 0.1904761905  | 0.05555555556 |  | 3.294117647  | #DIV/0! |
| PEX6    | 0.04761904762 | 0.04761904762 | 0.05555555556 |  | 0.7          | #DIV/0! |
| PF4     | 0.09523809524 | 0.09523809524 | 0.05555555556 |  | 1.473684211  | #DIV/0! |
| PF4V1   | 0.09523809524 | 0.09523809524 | 0.05555555556 |  | 1.473684211  | #DIV/0! |
| PFAS    | 0.04761904762 | 0.04761904762 | 0.05555555556 |  | 0.7          | #DIV/0! |
| PFDN1   | 0.04761904762 | 0.04761904762 | 0             |  | inf          | #DIV/0! |
| PFDN2   | 0.1428571429  | 0.1428571429  | 0             |  | inf          | #DIV/0! |
| PFDN4   | 0.09523809524 | 0.09523809524 | 0.1111111111  |  | 0.6842105263 | #DIV/0! |
| PFDN5   | 0.04761904762 | 0.04761904762 | 0.05555555556 |  | 0.7          | #DIV/0! |
| PFKFB2  | 0.1428571429  | 0.1428571429  | 0             |  | inf          | #DIV/0! |
| PFKFB3  | 0.09523809524 | 0.09523809524 | 0.1111111111  |  | 0.6842105263 | #DIV/0! |
| PFKFB4  | 0.09523809524 | 0.09523809524 | 0             |  | inf          | #DIV/0! |
| PFKL    | 0.04761904762 | 0.04761904762 | 0.1111111111  |  | 0.325        | #DIV/0! |
| PFKM    | 0.04761904762 | 0.04761904762 | 0.05555555556 |  | 0.7          | #DIV/0! |
| PFKP    | 0.04761904762 | 0.04761904762 | 0.1666666667  |  | 0.2          | #DIV/0! |
| PFN1    | 0             | 0             | 0.1111111111  |  | 0            | #DIV/0! |
| PFN1P2  | 0.09523809524 | 0.09523809524 | 0.05555555556 |  | 1.473684211  | #DIV/0! |
| PFN2    | 0.1904761905  | 0.1904761905  | 0.1111111111  |  | 1.529411765  | #DIV/0! |
| PFN3    | 0.09523809524 | 0.09523809524 | 0.05555555556 |  | 1.473684211  | #DIV/0! |
| PGAM1   | 0.1428571429  | 0.1428571429  | 0             |  | inf          | #DIV/0! |
| GAMIP   | 0.04761904762 | 0.04761904762 | 0.05555555556 |  | 0.7          | #DIV/0! |
| PGAM2   | 0.04761904762 | 0.04761904762 | 0.1666666667  |  | 0.2          | #DIV/0! |
| PGAM5   | 0.09523809524 | 0.09523809524 | 0.05555555556 |  | 1.473684211  | #DIV/0! |
| PGAP1   | 0             | 0             | 0.05555555556 |  | 0            | #DIV/0! |
| PGAP2   | 0.04761904762 | 0.04761904762 | 0             |  | inf          | #DIV/0! |
| PGAP3   | 0.09523809524 | 0.09523809524 | 0             |  | inf          | #DIV/0! |
| PGBD2   | 0.1428571429  | 0.1428571429  | 0             |  | inf          | #DIV/0! |
| PGBD3   | 0.09523809524 | 0.09523809524 | 0.05555555556 |  | 1.473684211  | #DIV/0! |
| PGBD5   | 0.1428571429  | 0.1428571429  | 0             |  | inf          | #DIV/0! |
| PGC     | 0.04761904762 | 0.04761904762 | 0.05555555556 |  | 0.7          | #DIV/0! |
| PGCP1   | 0.04761904762 | 0.04761904762 | 0             |  | inf          | #DIV/0! |
| PGD     | 0.04761904762 | 0.04761904762 | 0.1111111111  |  | 0.325        | #DIV/0! |
| PGGHG   | 0.04761904762 | 0.04761904762 | 0             |  | inf          | #DIV/0! |
| PGGT1B  | 0.04761904762 | 0.04761904762 | 0             |  | inf          | #DIV/0! |
| PGK2    | 0.04761904762 | 0.04761904762 | 0             |  | inf          | #DIV/0! |
| PGM1    | 0.04761904762 | 0.04761904762 | 0.05555555556 |  | 0.7          | #DIV/0! |
| PGM5    | 0.09523809524 | 0.09523809524 | 0.1666666667  |  | 0.4210526316 | #DIV/0! |
| GM5-AS  | 0.09523809524 | 0.09523809524 | 0.1666666667  |  | 0.4210526316 | #DIV/0! |
| PGM5P2  | 0.09523809524 | 0.09523809524 | 0.2222222222  |  | 0.2894736842 | #DIV/0! |
| M5P3-A  | 0.04761904762 | 0.04761904762 | 0.1111111111  |  | 0.325        | #DIV/0! |
| PGM5P4  | 0             | 0             | 0.05555555556 |  | 0            | #DIV/0! |
| M5P4-A  | 0             | 0             | 0.05555555556 |  | 0            | #DIV/0! |

|        |               |               |               |  |              |         |
|--------|---------------|---------------|---------------|--|--------------|---------|
| PGP    | 0.09523809524 | 0.09523809524 | 0.222222222   |  | 0.2894736842 | #DIV/0! |
| PGPEP1 | 0.1428571429  | 0.1428571429  | 0.1111111111  |  | 1.083333333  | #DIV/0! |
| GPEP11 | 0.04761904762 | 0.04761904762 | 0.05555555556 |  | 0.7          | #DIV/0! |
| GRMC2  | 0             | 0             | 0.05555555556 |  | 0            | #DIV/0! |
| PGS1   | 0.04761904762 | 0.04761904762 | 0             |  | inf          | #DIV/0! |
| HACTR  | 0.1428571429  | 0.1428571429  | 0.1666666667  |  | 0.6666666667 | #DIV/0! |
| HACTR  | 0.04761904762 | 0.04761904762 | 0.1111111111  |  | 0.325        | #DIV/0! |
| PHAX   | 0.04761904762 | 0.04761904762 | 0             |  | inf          | #DIV/0! |
| PHB    | 0.1428571429  | 0.1428571429  | 0             |  | inf          | #DIV/0! |
| PHB2   | 0.04761904762 | 0.04761904762 | 0.1111111111  |  | 0.325        | #DIV/0! |
| PHC1   | 0.04761904762 | 0.04761904762 | 0.1111111111  |  | 0.325        | #DIV/0! |
| PHC2   | 0.04761904762 | 0.04761904762 | 0.05555555556 |  | 0.7          | #DIV/0! |
| PHC3   | 0.1904761905  | 0.1904761905  | 0.05555555556 |  | 3.294117647  | #DIV/0! |
| PHETA1 | 0             | 0             | 0.1111111111  |  | 0            | #DIV/0! |
| PHETA2 | 0             | 0             | 0.1111111111  |  | 0            | #DIV/0! |
| PHF1   | 0.04761904762 | 0.04761904762 | 0             |  | inf          | #DIV/0! |
| PHF12  | 0.04761904762 | 0.04761904762 | 0.05555555556 |  | 0.7          | #DIV/0! |
| PHF13  | 0             | 0             | 0.05555555556 |  | 0            | #DIV/0! |
| PHF14  | 0.04761904762 | 0.04761904762 | 0.222222222   |  | 0.1375       | #DIV/0! |
| PHF19  | 0.09523809524 | 0.09523809524 | 0.05555555556 |  | 1.473684211  | #DIV/0! |
| PHF2   | 0.04761904762 | 0.04761904762 | 0.05555555556 |  | 0.7          | #DIV/0! |
| PHF20  | 0.09523809524 | 0.09523809524 | 0.1111111111  |  | 0.6842105263 | #DIV/0! |
| PHF20L | 0.04761904762 | 0.04761904762 | 0.1666666667  |  | 0.2          | #DIV/0! |
| PHF21B | 0             | 0             | 0.1666666667  |  | 0            | #DIV/0! |
| PHF23  | 0             | 0             | 0.05555555556 |  | 0            | #DIV/0! |
| PHF24  | 0.09523809524 | 0.09523809524 | 0.05555555556 |  | 1.473684211  | #DIV/0! |
| PHF5A  | 0             | 0             | 0.1111111111  |  | 0            | #DIV/0! |
| PHF7   | 0.04761904762 | 0.04761904762 | 0             |  | inf          | #DIV/0! |
| PHGDH  | 0.04761904762 | 0.04761904762 | 0.05555555556 |  | 0.7          | #DIV/0! |
| PHKB   | 0.04761904762 | 0.04761904762 | 0             |  | inf          | #DIV/0! |
| PHKG1  | 0.2380952381  | 0.2380952381  | 0.1666666667  |  | 1.25         | #DIV/0! |
| PHKG2  | 0.04761904762 | 0.04761904762 | 0             |  | inf          | #DIV/0! |
| PHLDA1 | 0.04761904762 | 0.04761904762 | 0.1111111111  |  | 0.325        | #DIV/0! |
| PHLDA2 | 0.04761904762 | 0.04761904762 | 0             |  | inf          | #DIV/0! |
| PHLDA3 | 0.1428571429  | 0.1428571429  | 0             |  | inf          | #DIV/0! |
| PHLDB2 | 0.09523809524 | 0.09523809524 | 0.05555555556 |  | 1.473684211  | #DIV/0! |
| PHLDB3 | 0.09523809524 | 0.09523809524 | 0.05555555556 |  | 1.473684211  | #DIV/0! |
| PHLPP1 | 0.09523809524 | 0.09523809524 | 0             |  | inf          | #DIV/0! |
| PHLPP2 | 0.04761904762 | 0.04761904762 | 0             |  | inf          | #DIV/0! |
| IOSPHC | 0.1428571429  | 0.1428571429  | 0             |  | inf          | #DIV/0! |
| IOSPHC | 0             | 0             | 0.05555555556 |  | 0            | #DIV/0! |
| PHO2-K | 0             | 0             | 0.05555555556 |  | 0            | #DIV/0! |
| PHOX2B | 0.04761904762 | 0.04761904762 | 0             |  | inf          | #DIV/0! |
| PHPT1  | 0.1428571429  | 0.1428571429  | 0.05555555556 |  | 2.333333333  | #DIV/0! |
| PHRF1  | 0.04761904762 | 0.04761904762 | 0             |  | inf          | #DIV/0! |
| PHTF1  | 0.04761904762 | 0.04761904762 | 0.05555555556 |  | 0.7          | #DIV/0! |
| PHTF2  | 0.04761904762 | 0.04761904762 | 0.1111111111  |  | 0.325        | #DIV/0! |
| PHYH   | 0.09523809524 | 0.09523809524 | 0.1111111111  |  | 0.6842105263 | #DIV/0! |
| PHYHIP | 0.09523809524 | 0.09523809524 | 0.1111111111  |  | 0.6842105263 | #DIV/0! |
| HYHIP  | 0.04761904762 | 0.04761904762 | 0.05555555556 |  | 0.7          | #DIV/0! |
| PHYKPI | 0.09523809524 | 0.09523809524 | 0.05555555556 |  | 1.473684211  | #DIV/0! |

|         |               |               |               |  |               |         |
|---------|---------------|---------------|---------------|--|---------------|---------|
| PII5    | 0.1904761905  | 0.1904761905  | 0.1111111111  |  | 1.529411765   | #DIV/0! |
| PII6    | 0.04761904762 | 0.04761904762 | 0.05555555556 |  | 0.7           | #DIV/0! |
| PI3     | 0.1428571429  | 0.1428571429  | 0.16666666667 |  | 0.66666666667 | #DIV/0! |
| PI4K2A  | 0.1428571429  | 0.1428571429  | 0             |  | inf           | #DIV/0! |
| PI4KA   | 0.04761904762 | 0.04761904762 | 0.05555555556 |  | 0.7           | #DIV/0! |
| PI4KAP0 | 0.04761904762 | 0.04761904762 | 0.05555555556 |  | 0.7           | #DIV/0! |
| PI4KAP2 | 0.04761904762 | 0.04761904762 | 0.05555555556 |  | 0.7           | #DIV/0! |
| PI4KB   | 0.1904761905  | 0.1904761905  | 0.05555555556 |  | 3.294117647   | #DIV/0! |
| PIANP   | 0.04761904762 | 0.04761904762 | 0.1111111111  |  | 0.325         | #DIV/0! |
| PIAS1   | 0.04761904762 | 0.04761904762 | 0.05555555556 |  | 0.7           | #DIV/0! |
| PIAS2   | 0.04761904762 | 0.04761904762 | 0.05555555556 |  | 0.7           | #DIV/0! |
| PIAS3   | 0.1428571429  | 0.1428571429  | 0.05555555556 |  | 2.333333333   | #DIV/0! |
| PIAS4   | 0.09523809524 | 0.09523809524 | 0.05555555556 |  | 1.473684211   | #DIV/0! |
| PI CART | 0.09523809524 | 0.09523809524 | 0             |  | inf           | #DIV/0! |
| PICK1   | 0.04761904762 | 0.04761904762 | 0.1111111111  |  | 0.325         | #DIV/0! |
| PICSAR0 | 0.04761904762 | 0.04761904762 | 0.1111111111  |  | 0.325         | #DIV/0! |
| PID1    | 0             | 0             | 0.05555555556 |  | 0             | #DIV/0! |
| PIDD1   | 0.04761904762 | 0.04761904762 | 0             |  | inf           | #DIV/0! |
| PIEZO1  | 0.1904761905  | 0.1904761905  | 0             |  | inf           | #DIV/0! |
| PIEZO2  | 0.09523809524 | 0.09523809524 | 0             |  | inf           | #DIV/0! |
| PIF1    | 0.04761904762 | 0.04761904762 | 0.05555555556 |  | 0.7           | #DIV/0! |
| PIFO    | 0.04761904762 | 0.04761904762 | 0             |  | inf           | #DIV/0! |
| PIGB    | 0.04761904762 | 0.04761904762 | 0.05555555556 |  | 0.7           | #DIV/0! |
| PIGBOS0 | 0.04761904762 | 0.04761904762 | 0.05555555556 |  | 0.7           | #DIV/0! |
| PIGC    | 0.1428571429  | 0.1428571429  | 0.05555555556 |  | 2.333333333   | #DIV/0! |
| PIGF    | 0             | 0             | 0.05555555556 |  | 0             | #DIV/0! |
| PIGG    | 0.04761904762 | 0.04761904762 | 0             |  | inf           | #DIV/0! |
| PIGK    | 0.04761904762 | 0.04761904762 | 0.05555555556 |  | 0.7           | #DIV/0! |
| PIGM    | 0.1428571429  | 0.1428571429  | 0             |  | inf           | #DIV/0! |
| PIGN    | 0.09523809524 | 0.09523809524 | 0             |  | inf           | #DIV/0! |
| PIGO    | 0.09523809524 | 0.09523809524 | 0.05555555556 |  | 1.473684211   | #DIV/0! |
| PIGP    | 0.04761904762 | 0.04761904762 | 0.16666666667 |  | 0.2           | #DIV/0! |
| PIGQ    | 0.04761904762 | 0.04761904762 | 0.2222222222  |  | 0.1375        | #DIV/0! |
| PIGR    | 0.1428571429  | 0.1428571429  | 0             |  | inf           | #DIV/0! |
| PIGS    | 0.04761904762 | 0.04761904762 | 0.05555555556 |  | 0.7           | #DIV/0! |
| PIGT    | 0.1428571429  | 0.1428571429  | 0.16666666667 |  | 0.66666666667 | #DIV/0! |
| PIGU    | 0.09523809524 | 0.09523809524 | 0.1111111111  |  | 0.6842105263  | #DIV/0! |
| PIGV    | 0.04761904762 | 0.04761904762 | 0.1111111111  |  | 0.325         | #DIV/0! |
| PIGW    | 0.04761904762 | 0.04761904762 | 0             |  | inf           | #DIV/0! |
| PIGX    | 0.1428571429  | 0.1428571429  | 0.05555555556 |  | 2.333333333   | #DIV/0! |
| PIGY    | 0             | 0             | 0.05555555556 |  | 0             | #DIV/0! |
| PIGY-DT | 0             | 0             | 0.05555555556 |  | 0             | #DIV/0! |
| PIGZ    | 0.1428571429  | 0.1428571429  | 0.05555555556 |  | 2.333333333   | #DIV/0! |
| PIH1D1  | 0.09523809524 | 0.09523809524 | 0.1111111111  |  | 0.6842105263  | #DIV/0! |
| PIK3AP1 | 0.1428571429  | 0.1428571429  | 0             |  | inf           | #DIV/0! |
| PIK3C2E | 0.2380952381  | 0.2380952381  | 0             |  | inf           | #DIV/0! |
| PIK3C2C | 0.04761904762 | 0.04761904762 | 0.1111111111  |  | 0.325         | #DIV/0! |
| PIK3C3  | 0.04761904762 | 0.04761904762 | 0             |  | inf           | #DIV/0! |
| PIK3CA  | 0.1904761905  | 0.1904761905  | 0.05555555556 |  | 3.294117647   | #DIV/0! |
| PIK3CB  | 0.1428571429  | 0.1428571429  | 0.05555555556 |  | 2.333333333   | #DIV/0! |
| PIK3CD  | 0             | 0             | 0.05555555556 |  | 0             | #DIV/0! |



|         |               |               |               |  |              |         |
|---------|---------------|---------------|---------------|--|--------------|---------|
| K3CD-A  | 0             | 0             | 0.05555555556 |  | 0            | #DIV/0! |
| K3CD-A  | 0             | 0             | 0.05555555556 |  | 0            | #DIV/0! |
| PIK3CG  | 0.04761904762 | 0.04761904762 | 0.05555555556 |  | 0.7          | #DIV/0! |
| PIK3IP1 | 0.04761904762 | 0.04761904762 | 0.11111111111 |  | 0.325        | #DIV/0! |
| K3IP1-A | 0.04761904762 | 0.04761904762 | 0.11111111111 |  | 0.325        | #DIV/0! |
| PIK3R1  | 0.04761904762 | 0.04761904762 | 0             |  | inf          | #DIV/0! |
| PIK3R2  | 0.1428571429  | 0.1428571429  | 0.11111111111 |  | 1.083333333  | #DIV/0! |
| PIK3R3  | 0.04761904762 | 0.04761904762 | 0.05555555556 |  | 0.7          | #DIV/0! |
| PIK3R4  | 0.09523809524 | 0.09523809524 | 0.05555555556 |  | 1.473684211  | #DIV/0! |
| PIK3R5  | 0.04761904762 | 0.04761904762 | 0.05555555556 |  | 0.7          | #DIV/0! |
| PIK3R6  | 0.04761904762 | 0.04761904762 | 0.05555555556 |  | 0.7          | #DIV/0! |
| IKFYVI  | 0             | 0             | 0.05555555556 |  | 0            | #DIV/0! |
| PILRA   | 0.04761904762 | 0.04761904762 | 0.05555555556 |  | 0.7          | #DIV/0! |
| PILRB   | 0.04761904762 | 0.04761904762 | 0.05555555556 |  | 0.7          | #DIV/0! |
| PIMI    | 0.04761904762 | 0.04761904762 | 0.05555555556 |  | 0.7          | #DIV/0! |
| PIM3    | 0             | 0             | 0.11111111111 |  | 0            | #DIV/0! |
| PIMREC  | 0             | 0             | 0.05555555556 |  | 0            | #DIV/0! |
| PIN1    | 0.1428571429  | 0.1428571429  | 0.11111111111 |  | 1.083333333  | #DIV/0! |
| PIN1P1  | 0.04761904762 | 0.04761904762 | 0.05555555556 |  | 0.7          | #DIV/0! |
| PINK1   | 0.04761904762 | 0.04761904762 | 0.11111111111 |  | 0.325        | #DIV/0! |
| INK1-A  | 0.04761904762 | 0.04761904762 | 0.11111111111 |  | 0.325        | #DIV/0! |
| PINLYP  | 0.09523809524 | 0.09523809524 | 0.05555555556 |  | 1.473684211  | #DIV/0! |
| PINX1   | 0.09523809524 | 0.09523809524 | 0.11111111111 |  | 0.6842105263 | #DIV/0! |
| PIP     | 0.04761904762 | 0.04761904762 | 0.05555555556 |  | 0.7          | #DIV/0! |
| PIP4K2A | 0.09523809524 | 0.09523809524 | 0.11111111111 |  | 0.6842105263 | #DIV/0! |
| PIP4K2B | 0.09523809524 | 0.09523809524 | 0             |  | inf          | #DIV/0! |
| PIP4K2C | 0.1428571429  | 0.1428571429  | 0.05555555556 |  | 2.333333333  | #DIV/0! |
| PIP4P2  | 0.1904761905  | 0.1904761905  | 0.11111111111 |  | 1.529411765  | #DIV/0! |
| PIP5K1A | 0.1904761905  | 0.1904761905  | 0.05555555556 |  | 3.294117647  | #DIV/0! |
| PIP5K1B | 0             | 0             | 0.05555555556 |  | 0            | #DIV/0! |
| PIP5K1C | 0.09523809524 | 0.09523809524 | 0.05555555556 |  | 1.473684211  | #DIV/0! |
| PIP5KL1 | 0.09523809524 | 0.09523809524 | 0.05555555556 |  | 1.473684211  | #DIV/0! |
| PIPOX   | 0.04761904762 | 0.04761904762 | 0.05555555556 |  | 0.7          | #DIV/0! |
| PIPSL   | 0.1428571429  | 0.1428571429  | 0             |  | inf          | #DIV/0! |
| PIRT    | 0.04761904762 | 0.04761904762 | 0.05555555556 |  | 0.7          | #DIV/0! |
| PISD    | 0.04761904762 | 0.04761904762 | 0.11111111111 |  | 0.325        | #DIV/0! |
| PISRT1  | 0.1428571429  | 0.1428571429  | 0.05555555556 |  | 2.333333333  | #DIV/0! |
| PITHD1  | 0.04761904762 | 0.04761904762 | 0.11111111111 |  | 0.325        | #DIV/0! |
| PITPNA  | 0             | 0             | 0.11111111111 |  | 0            | #DIV/0! |
| TPNA-A  | 0             | 0             | 0.11111111111 |  | 0            | #DIV/0! |
| PITPNB  | 0.04761904762 | 0.04761904762 | 0.11111111111 |  | 0.325        | #DIV/0! |
| PITPNC  | 0             | 0             | 0             |  |              | #DIV/0! |
| ITPNM   | 0.04761904762 | 0.04761904762 | 0.11111111111 |  | 0.325        | #DIV/0! |
| PNM2-A  | 0.04761904762 | 0.04761904762 | 0.11111111111 |  | 0.325        | #DIV/0! |
| ITPNM   | 0             | 0             | 0.05555555556 |  | 0            | #DIV/0! |
| PITRM1  | 0.04761904762 | 0.04761904762 | 0.16666666667 |  | 0.2          | #DIV/0! |
| TRM1-A  | 0.04761904762 | 0.04761904762 | 0.16666666667 |  | 0.2          | #DIV/0! |
| PITX2   | 0             | 0             | 0.05555555556 |  | 0            | #DIV/0! |
| PITX3   | 0.1428571429  | 0.1428571429  | 0.05555555556 |  | 2.333333333  | #DIV/0! |
| PIWIL1  | 0.09523809524 | 0.09523809524 | 0.05555555556 |  | 1.473684211  | #DIV/0! |
| PIWIL2  | 0.09523809524 | 0.09523809524 | 0.11111111111 |  | 0.6842105263 | #DIV/0! |

|         |               |               |               |  |              |         |
|---------|---------------|---------------|---------------|--|--------------|---------|
| PIWIL3  | 0.04761904762 | 0.04761904762 | 0.05555555556 |  | 0.7          | #DIV/0! |
| PJA2    | 0.04761904762 | 0.04761904762 | 0             |  | inf          | #DIV/0! |
| PJKV    | 0             | 0             | 0.1111111111  |  | 0            | #DIV/0! |
| PKD1    | 0.09523809524 | 0.09523809524 | 0.2222222222  |  | 0.2894736842 | #DIV/0! |
| PKD1L1  | 0.04761904762 | 0.04761904762 | 0.2222222222  |  | 0.1375       | #DIV/0! |
| PKD1L2  | 0.09523809524 | 0.09523809524 | 0             |  | inf          | #DIV/0! |
| PKD1L3  | 0.04761904762 | 0.04761904762 | 0             |  | inf          | #DIV/0! |
| PKD1P1  | 0.04761904762 | 0.04761904762 | 0             |  | inf          | #DIV/0! |
| 1P3-NP1 | 0.04761904762 | 0.04761904762 | 0             |  | inf          | #DIV/0! |
| 1P4-NP1 | 0.09523809524 | 0.09523809524 | 0             |  | inf          | #DIV/0! |
| -LOC10  | 0.09523809524 | 0.09523809524 | 0             |  | inf          | #DIV/0! |
| 1P6-NP1 | 0.04761904762 | 0.04761904762 | 0             |  | inf          | #DIV/0! |
| PKD2    | 0             | 0             | 0.05555555556 |  | 0            | #DIV/0! |
| PKD2L1  | 0.1428571429  | 0.1428571429  | 0             |  | inf          | #DIV/0! |
| PKD2L2  | 0.04761904762 | 0.04761904762 | 0             |  | inf          | #DIV/0! |
| PKDCC   | 0             | 0             | 0.05555555556 |  | 0            | #DIV/0! |
| PKDREJ  | 0             | 0             | 0.1111111111  |  | 0            | #DIV/0! |
| PKHD1   | 0.04761904762 | 0.04761904762 | 0             |  | inf          | #DIV/0! |
| KHD1L   | 0.1904761905  | 0.1904761905  | 0.1111111111  |  | 1.529411765  | #DIV/0! |
| PKIA    | 0.1428571429  | 0.1428571429  | 0.1111111111  |  | 1.083333333  | #DIV/0! |
| KIA-AS  | 0.1428571429  | 0.1428571429  | 0.1111111111  |  | 1.083333333  | #DIV/0! |
| PKIG    | 0.1428571429  | 0.1428571429  | 0.1666666667  |  | 0.6666666667 | #DIV/0! |
| PKLR    | 0.1904761905  | 0.1904761905  | 0.1111111111  |  | 1.529411765  | #DIV/0! |
| PKM     | 0.04761904762 | 0.04761904762 | 0.05555555556 |  | 0.7          | #DIV/0! |
| PKMYT   | 0.04761904762 | 0.04761904762 | 0.1111111111  |  | 0.325        | #DIV/0! |
| PKN1    | 0.1428571429  | 0.1428571429  | 0.1111111111  |  | 1.083333333  | #DIV/0! |
| PKN2    | 0.04761904762 | 0.04761904762 | 0.05555555556 |  | 0.7          | #DIV/0! |
| KN2-AS  | 0.04761904762 | 0.04761904762 | 0.05555555556 |  | 0.7          | #DIV/0! |
| PKN3    | 0.09523809524 | 0.09523809524 | 0.05555555556 |  | 1.473684211  | #DIV/0! |
| PKNOX1  | 0.04761904762 | 0.04761904762 | 0.1666666667  |  | 0.2          | #DIV/0! |
| PKP1    | 0.1428571429  | 0.1428571429  | 0             |  | inf          | #DIV/0! |
| PKP2    | 0.1428571429  | 0.1428571429  | 0.1111111111  |  | 1.083333333  | #DIV/0! |
| PKP3    | 0.04761904762 | 0.04761904762 | 0             |  | inf          | #DIV/0! |
| PKP4    | 0             | 0             | 0.05555555556 |  | 0            | #DIV/0! |
| KP4-AS  | 0             | 0             | 0.05555555556 |  | 0            | #DIV/0! |
| PLA1A   | 0.09523809524 | 0.09523809524 | 0.05555555556 |  | 1.473684211  | #DIV/0! |
| PLA2G10 | 0.04761904762 | 0.04761904762 | 0             |  | inf          | #DIV/0! |
| LA2G12  | 0             | 0             | 0.05555555556 |  | 0            | #DIV/0! |
| LA2G12  | 0.1904761905  | 0.1904761905  | 0.05555555556 |  | 3.294117647  | #DIV/0! |
| PLA2G15 | 0.1428571429  | 0.1428571429  | 0.05555555556 |  | 2.333333333  | #DIV/0! |
| LA2G11  | 0             | 0             | 0.1111111111  |  | 0            | #DIV/0! |
| LA2G20  | 0.04761904762 | 0.04761904762 | 0.1111111111  |  | 0.325        | #DIV/0! |
| LA2G20  | 0.04761904762 | 0.04761904762 | 0.1111111111  |  | 0.325        | #DIV/0! |
| LA2G210 | 0.04761904762 | 0.04761904762 | 0.1111111111  |  | 0.325        | #DIV/0! |
| LA2G210 | 0.04761904762 | 0.04761904762 | 0.1111111111  |  | 0.325        | #DIV/0! |
| LA2G210 | 0.04761904762 | 0.04761904762 | 0.1111111111  |  | 0.325        | #DIV/0! |
| PLA2G30 | 0.04761904762 | 0.04761904762 | 0.1111111111  |  | 0.325        | #DIV/0! |
| LA2G40  | 0.1428571429  | 0.1428571429  | 0.05555555556 |  | 2.333333333  | #DIV/0! |
| LA2G40  | 0.09523809524 | 0.09523809524 | 0.1111111111  |  | 0.6842105263 | #DIV/0! |
| LA2G4C  | 0.09523809524 | 0.09523809524 | 0.1111111111  |  | 0.6842105263 | #DIV/0! |
| PLA2G50 | 0.04761904762 | 0.04761904762 | 0.1111111111  |  | 0.325        | #DIV/0! |

|          |               |               |               |  |              |         |
|----------|---------------|---------------|---------------|--|--------------|---------|
| PLA2G6   | 0.04761904762 | 0.04761904762 | 0.1111111111  |  | 0.325        | #DIV/0! |
| PLA2G7   | 0.04761904762 | 0.04761904762 | 0.05555555556 |  | 0.7          | #DIV/0! |
| PLA2R1   | 0             | 0             | 0.05555555556 |  | 0            | #DIV/0! |
| PLAA     | 0.04761904762 | 0.04761904762 | 0.05555555556 |  | 0.7          | #DIV/0! |
| PLAAT1   | 0.09523809524 | 0.09523809524 | 0.05555555556 |  | 1.473684211  | #DIV/0! |
| PLAC4    | 0.04761904762 | 0.04761904762 | 0.1111111111  |  | 0.325        | #DIV/0! |
| PLAC8    | 0             | 0             | 0.05555555556 |  | 0            | #DIV/0! |
| PLAC9    | 0.1428571429  | 0.1428571429  | 0             |  | inf          | #DIV/0! |
| PLAC9P   | 0             | 0             | 0.05555555556 |  | 0            | #DIV/0! |
| PLAG1    | 0.1428571429  | 0.1428571429  | 0.1111111111  |  | 1.083333333  | #DIV/0! |
| PLAT     | 0.09523809524 | 0.09523809524 | 0.1666666667  |  | 0.4210526316 | #DIV/0! |
| PLAU     | 0.1904761905  | 0.1904761905  | 0.05555555556 |  | 3.294117647  | #DIV/0! |
| PLAUR    | 0.09523809524 | 0.09523809524 | 0.05555555556 |  | 1.473684211  | #DIV/0! |
| PLB1     | 0             | 0             | 0.05555555556 |  | 0            | #DIV/0! |
| PLBD1    | 0.04761904762 | 0.04761904762 | 0.1111111111  |  | 0.325        | #DIV/0! |
| PLBD1-AS | 0.04761904762 | 0.04761904762 | 0.1111111111  |  | 0.325        | #DIV/0! |
| PLBD2    | 0             | 0             | 0.05555555556 |  | 0            | #DIV/0! |
| PLCB1    | 0.1904761905  | 0.1904761905  | 0.1666666667  |  | 0.9411764706 | #DIV/0! |
| PLCB1-IT | 0.1904761905  | 0.1904761905  | 0.1666666667  |  | 0.9411764706 | #DIV/0! |
| PLCB4    | 0.1904761905  | 0.1904761905  | 0.1111111111  |  | 1.529411765  | #DIV/0! |
| PLCD1    | 0.04761904762 | 0.04761904762 | 0             |  | inf          | #DIV/0! |
| PLCD3    | 0.1428571429  | 0.1428571429  | 0             |  | inf          | #DIV/0! |
| PLCD4    | 0             | 0             | 0.05555555556 |  | 0            | #DIV/0! |
| PLCE1    | 0.1428571429  | 0.1428571429  | 0             |  | inf          | #DIV/0! |
| PLCE1-AS | 0.1428571429  | 0.1428571429  | 0             |  | inf          | #DIV/0! |
| PLCE1-AS | 0.1428571429  | 0.1428571429  | 0             |  | inf          | #DIV/0! |
| PLCG1    | 0.1428571429  | 0.1428571429  | 0.1666666667  |  | 0.6666666667 | #DIV/0! |
| PLCG1-AS | 0.1428571429  | 0.1428571429  | 0.1666666667  |  | 0.6666666667 | #DIV/0! |
| PLCG2    | 0.04761904762 | 0.04761904762 | 0             |  | inf          | #DIV/0! |
| PLCH1    | 0.1904761905  | 0.1904761905  | 0.05555555556 |  | 3.294117647  | #DIV/0! |
| PLCH1-AS | 0.1904761905  | 0.1904761905  | 0.05555555556 |  | 3.294117647  | #DIV/0! |
| PLCH2    | 0             | 0             | 0.1111111111  |  | 0            | #DIV/0! |
| PLCL1    | 0             | 0             | 0.05555555556 |  | 0            | #DIV/0! |
| PLCL2    | 0.04761904762 | 0.04761904762 | 0             |  | inf          | #DIV/0! |
| PLCXD2   | 0.09523809524 | 0.09523809524 | 0.05555555556 |  | 1.473684211  | #DIV/0! |
| PLCXD2-A | 0.09523809524 | 0.09523809524 | 0.05555555556 |  | 1.473684211  | #DIV/0! |
| PLCXD3   | 0.04761904762 | 0.04761904762 | 0.05555555556 |  | 0.7          | #DIV/0! |
| PLCZ1    | 0.04761904762 | 0.04761904762 | 0.1111111111  |  | 0.325        | #DIV/0! |
| PLD1     | 0.1904761905  | 0.1904761905  | 0.1111111111  |  | 1.529411765  | #DIV/0! |
| PLD3     | 0.04761904762 | 0.04761904762 | 0.05555555556 |  | 0.7          | #DIV/0! |
| PLD5     | 0.1428571429  | 0.1428571429  | 0             |  | inf          | #DIV/0! |
| PLD6     | 0.04761904762 | 0.04761904762 | 0.1111111111  |  | 0.325        | #DIV/0! |
| PLEC     | 0.04761904762 | 0.04761904762 | 0.1666666667  |  | 0.2          | #DIV/0! |
| PLEK     | 0             | 0             | 0.05555555556 |  | 0            | #DIV/0! |
| LEKHA    | 0.1904761905  | 0.1904761905  | 0.05555555556 |  | 3.294117647  | #DIV/0! |
| LEKHA    | 0.09523809524 | 0.09523809524 | 0.1111111111  |  | 0.6842105263 | #DIV/0! |
| LEKHA    | 0             | 0             | 0.1111111111  |  | 0            | #DIV/0! |
| LEKHA    | 0.09523809524 | 0.09523809524 | 0.1111111111  |  | 0.6842105263 | #DIV/0! |
| LEKHA    | 0.04761904762 | 0.04761904762 | 0.1111111111  |  | 0.325        | #DIV/0! |
| LEKHA    | 0.2380952381  | 0.2380952381  | 0             |  | inf          | #DIV/0! |
| LEKHA    | 0.04761904762 | 0.04761904762 | 0.1666666667  |  | 0.2          | #DIV/0! |

|        |               |               |               |  |              |         |
|--------|---------------|---------------|---------------|--|--------------|---------|
| EKHA8  | 0.04761904762 | 0.04761904762 | 0.05555555556 |  | 0.7          | #DIV/0! |
| LEKHB  | 0             | 0             | 0.05555555556 |  | 0            | #DIV/0! |
| LEKHF  | 0.04761904762 | 0.04761904762 | 0.16666666667 |  | 0.2          | #DIV/0! |
| LEKHF  | 0.1904761905  | 0.1904761905  | 0.11111111111 |  | 1.529411765  | #DIV/0! |
| LEKHG  | 0.04761904762 | 0.04761904762 | 0.05555555556 |  | 0.7          | #DIV/0! |
| LEKHG  | 0.1428571429  | 0.1428571429  | 0.05555555556 |  | 2.333333333  | #DIV/0! |
| EKHG4  | 0             | 0             | 0.05555555556 |  | 0            | #DIV/0! |
| LEKHG  | 0             | 0             | 0.05555555556 |  | 0            | #DIV/0! |
| LEKHG  | 0.04761904762 | 0.04761904762 | 0.11111111111 |  | 0.325        | #DIV/0! |
| LEKHG  | 0.04761904762 | 0.04761904762 | 0.05555555556 |  | 0.7          | #DIV/0! |
| LEKHH  | 0             | 0             | 0.05555555556 |  | 0            | #DIV/0! |
| LEKHH  | 0.04761904762 | 0.04761904762 | 0             |  | inf          | #DIV/0! |
| LEKHJ  | 0.09523809524 | 0.09523809524 | 0.11111111111 |  | 0.6842105263 | #DIV/0! |
| LEKHM  | 0.1428571429  | 0.1428571429  | 0             |  | inf          | #DIV/0! |
| EKHM1  | 0.04761904762 | 0.04761904762 | 0             |  | inf          | #DIV/0! |
| LEKHM  | 0.04761904762 | 0.04761904762 | 0.11111111111 |  | 0.325        | #DIV/0! |
| LEKHM  | 0             | 0             | 0.05555555556 |  | 0            | #DIV/0! |
| LEKHN  | 0             | 0             | 0.11111111111 |  | 0            | #DIV/0! |
| LEKHO  | 0.1904761905  | 0.1904761905  | 0.05555555556 |  | 3.294117647  | #DIV/0! |
| LEKHO  | 0.04761904762 | 0.04761904762 | 0.05555555556 |  | 0.7          | #DIV/0! |
| LEKHS  | 0.1428571429  | 0.1428571429  | 0.05555555556 |  | 2.333333333  | #DIV/0! |
| PLGRK1 | 0.04761904762 | 0.04761904762 | 0.05555555556 |  | 0.7          | #DIV/0! |
| PLIN1  | 0.04761904762 | 0.04761904762 | 0.05555555556 |  | 0.7          | #DIV/0! |
| PLIN2  | 0.04761904762 | 0.04761904762 | 0.05555555556 |  | 0.7          | #DIV/0! |
| PLIN3  | 0.09523809524 | 0.09523809524 | 0.05555555556 |  | 1.473684211  | #DIV/0! |
| PLIN4  | 0.09523809524 | 0.09523809524 | 0.05555555556 |  | 1.473684211  | #DIV/0! |
| PLIN5  | 0.09523809524 | 0.09523809524 | 0.05555555556 |  | 1.473684211  | #DIV/0! |
| PLK1   | 0.04761904762 | 0.04761904762 | 0             |  | inf          | #DIV/0! |
| PLK2   | 0.04761904762 | 0.04761904762 | 0             |  | inf          | #DIV/0! |
| PLK3   | 0.04761904762 | 0.04761904762 | 0.05555555556 |  | 0.7          | #DIV/0! |
| PLK4   | 0             | 0             | 0.05555555556 |  | 0            | #DIV/0! |
| PLK5   | 0.09523809524 | 0.09523809524 | 0.11111111111 |  | 0.6842105263 | #DIV/0! |
| PLLP   | 0.04761904762 | 0.04761904762 | 0             |  | inf          | #DIV/0! |
| PLOD1  | 0.04761904762 | 0.04761904762 | 0.11111111111 |  | 0.325        | #DIV/0! |
| PLOD2  | 0.1428571429  | 0.1428571429  | 0.11111111111 |  | 1.083333333  | #DIV/0! |
| PLOD3  | 0.04761904762 | 0.04761904762 | 0.05555555556 |  | 0.7          | #DIV/0! |
| PLPBP  | 0.04761904762 | 0.04761904762 | 0.11111111111 |  | 0.325        | #DIV/0! |
| PLPP1  | 0.04761904762 | 0.04761904762 | 0.05555555556 |  | 0.7          | #DIV/0! |
| PLPP2  | 0.09523809524 | 0.09523809524 | 0.11111111111 |  | 0.6842105263 | #DIV/0! |
| PLPP3  | 0.04761904762 | 0.04761904762 | 0.05555555556 |  | 0.7          | #DIV/0! |
| PLPP4  | 0.2380952381  | 0.2380952381  | 0             |  | inf          | #DIV/0! |
| PLPP5  | 0.09523809524 | 0.09523809524 | 0.11111111111 |  | 0.6842105263 | #DIV/0! |
| PLPP6  | 0.04761904762 | 0.04761904762 | 0.05555555556 |  | 0.7          | #DIV/0! |
| PLPP7  | 0.09523809524 | 0.09523809524 | 0.05555555556 |  | 1.473684211  | #DIV/0! |
| PLPPR1 | 0.04761904762 | 0.04761904762 | 0             |  | inf          | #DIV/0! |
| PLPPR3 | 0.09523809524 | 0.09523809524 | 0.11111111111 |  | 0.6842105263 | #DIV/0! |
| PLPPR4 | 0.04761904762 | 0.04761904762 | 0.05555555556 |  | 0.7          | #DIV/0! |
| PLPPR5 | 0.04761904762 | 0.04761904762 | 0.05555555556 |  | 0.7          | #DIV/0! |
| PLRG1  | 0             | 0             | 0.05555555556 |  | 0            | #DIV/0! |
| PLS1   | 0.2380952381  | 0.2380952381  | 0.05555555556 |  | 4.375        | #DIV/0! |
| PLSCR1 | 0.1428571429  | 0.1428571429  | 0.11111111111 |  | 1.083333333  | #DIV/0! |

|        |               |               |              |  |              |         |
|--------|---------------|---------------|--------------|--|--------------|---------|
| PLSCR2 | 0.1428571429  | 0.1428571429  | 0.1111111111 |  | 1.083333333  | #DIV/0! |
| PLSCR3 | 0             | 0             | 0.0555555556 |  | 0            | #DIV/0! |
| PLSCR4 | 0.1428571429  | 0.1428571429  | 0.1111111111 |  | 1.083333333  | #DIV/0! |
| PLSCR5 | 0.1428571429  | 0.1428571429  | 0.1111111111 |  | 1.083333333  | #DIV/0! |
| PLTP   | 0.1428571429  | 0.1428571429  | 0.1666666667 |  | 0.6666666667 | #DIV/0! |
| PLVAP  | 0.1428571429  | 0.1428571429  | 0.1111111111 |  | 1.083333333  | #DIV/0! |
| PLXDC1 | 0.09523809524 | 0.09523809524 | 0            |  | inf          | #DIV/0! |
| PLXDC2 | 0.09523809524 | 0.09523809524 | 0.1111111111 |  | 0.6842105263 | #DIV/0! |
| PLXNA1 | 0.09523809524 | 0.09523809524 | 0.0555555556 |  | 1.473684211  | #DIV/0! |
| PLXNA2 | 0.1428571429  | 0.1428571429  | 0            |  | inf          | #DIV/0! |
| PLXNA4 | 0.04761904762 | 0.04761904762 | 0.0555555556 |  | 0.7          | #DIV/0! |
| PLXNB1 | 0.09523809524 | 0.09523809524 | 0            |  | inf          | #DIV/0! |
| PLXNB2 | 0             | 0             | 0.1111111111 |  | 0            | #DIV/0! |
| PLXNC1 | 0.04761904762 | 0.04761904762 | 0.0555555556 |  | 0.7          | #DIV/0! |
| PLXND1 | 0.09523809524 | 0.09523809524 | 0.0555555556 |  | 1.473684211  | #DIV/0! |
| PM20D1 | 0.1428571429  | 0.1428571429  | 0            |  | inf          | #DIV/0! |
| PMAIP1 | 0.09523809524 | 0.09523809524 | 0            |  | inf          | #DIV/0! |
| PMCH   | 0.04761904762 | 0.04761904762 | 0.0555555556 |  | 0.7          | #DIV/0! |
| PMCHL  | 0.04761904762 | 0.04761904762 | 0.1111111111 |  | 0.325        | #DIV/0! |
| PMCHL2 | 0.04761904762 | 0.04761904762 | 0.0555555556 |  | 0.7          | #DIV/0! |
| PMEL   | 0.04761904762 | 0.04761904762 | 0.0555555556 |  | 0.7          | #DIV/0! |
| PMEPA1 | 0.1428571429  | 0.1428571429  | 0.2222222222 |  | 0.4583333333 | #DIV/0! |
| PMFBP1 | 0.04761904762 | 0.04761904762 | 0            |  | inf          | #DIV/0! |
| PML    | 0.04761904762 | 0.04761904762 | 0.0555555556 |  | 0.7          | #DIV/0! |
| PMM1   | 0             | 0             | 0.1111111111 |  | 0            | #DIV/0! |
| PMM2   | 0.09523809524 | 0.09523809524 | 0            |  | inf          | #DIV/0! |
| PMP2   | 0.1428571429  | 0.1428571429  | 0.1111111111 |  | 1.083333333  | #DIV/0! |
| PMP22  | 0.04761904762 | 0.04761904762 | 0.0555555556 |  | 0.7          | #DIV/0! |
| PMPCA  | 0.1428571429  | 0.1428571429  | 0.0555555556 |  | 2.333333333  | #DIV/0! |
| PMPCB  | 0.04761904762 | 0.04761904762 | 0.0555555556 |  | 0.7          | #DIV/0! |
| PMS1   | 0             | 0             | 0.0555555556 |  | 0            | #DIV/0! |
| PMS2   | 0.04761904762 | 0.04761904762 | 0.1666666667 |  | 0.2          | #DIV/0! |
| PMS2C1 | 0.04761904762 | 0.04761904762 | 0.1666666667 |  | 0.2          | #DIV/0! |
| PMS2P1 | 0.04761904762 | 0.04761904762 | 0.0555555556 |  | 0.7          | #DIV/0! |
| PMS2P2 | 0.1428571429  | 0.1428571429  | 0.1111111111 |  | 1.083333333  | #DIV/0! |
| PMS2P3 | 0.1428571429  | 0.1428571429  | 0.1666666667 |  | 0.6666666667 | #DIV/0! |
| PMS2P4 | 0.04761904762 | 0.04761904762 | 0.1111111111 |  | 0.325        | #DIV/0! |
| PMS2P5 | 0.1428571429  | 0.1428571429  | 0.1666666667 |  | 0.6666666667 | #DIV/0! |
| PMS2P7 | 0.1428571429  | 0.1428571429  | 0.1666666667 |  | 0.6666666667 | #DIV/0! |
| PMS2P9 | 0.04761904762 | 0.04761904762 | 0.1111111111 |  | 0.325        | #DIV/0! |
| PMVK   | 0.1904761905  | 0.1904761905  | 0.1111111111 |  | 1.529411765  | #DIV/0! |
| PNKD   | 0             | 0             | 0.0555555556 |  | 0            | #DIV/0! |
| PNKP   | 0.09523809524 | 0.09523809524 | 0.1111111111 |  | 0.6842105263 | #DIV/0! |
| PNLIP  | 0.2380952381  | 0.2380952381  | 0            |  | inf          | #DIV/0! |
| NLIPRP | 0.2380952381  | 0.2380952381  | 0            |  | inf          | #DIV/0! |
| NLIPRP | 0.2380952381  | 0.2380952381  | 0            |  | inf          | #DIV/0! |
| NLIPRP | 0.2380952381  | 0.2380952381  | 0            |  | inf          | #DIV/0! |
| PNMA1  | 0.09523809524 | 0.09523809524 | 0            |  | inf          | #DIV/0! |
| PNMA2  | 0.04761904762 | 0.04761904762 | 0.1111111111 |  | 0.325        | #DIV/0! |
| PNMA8A | 0.09523809524 | 0.09523809524 | 0.1111111111 |  | 0.6842105263 | #DIV/0! |
| PNMA8B | 0.09523809524 | 0.09523809524 | 0.1111111111 |  | 0.6842105263 | #DIV/0! |

|           |               |               |               |  |              |         |
|-----------|---------------|---------------|---------------|--|--------------|---------|
| PNMT      | 0.09523809524 | 0.09523809524 | 0             |  | inf          | #DIV/0! |
| PNN       | 0.04761904762 | 0.04761904762 | 0             |  | inf          | #DIV/0! |
| PNO1      | 0             | 0             | 0.05555555556 |  | 0            | #DIV/0! |
| PNOC      | 0.04761904762 | 0.04761904762 | 0.1111111111  |  | 0.325        | #DIV/0! |
| PNPLA1    | 0.04761904762 | 0.04761904762 | 0.05555555556 |  | 0.7          | #DIV/0! |
| PNPLA2    | 0.04761904762 | 0.04761904762 | 0             |  | inf          | #DIV/0! |
| PNPLA3    | 0             | 0             | 0.1666666667  |  | 0            | #DIV/0! |
| PNPLA5    | 0             | 0             | 0.1666666667  |  | 0            | #DIV/0! |
| PNPLA6    | 0.1428571429  | 0.1428571429  | 0.05555555556 |  | 2.333333333  | #DIV/0! |
| PNPLA7    | 0.09523809524 | 0.09523809524 | 0             |  | inf          | #DIV/0! |
| PNPLA8    | 0.04761904762 | 0.04761904762 | 0.05555555556 |  | 0.7          | #DIV/0! |
| PNPO      | 0.1428571429  | 0.1428571429  | 0             |  | inf          | #DIV/0! |
| PNPT1     | 0.04761904762 | 0.04761904762 | 0.05555555556 |  | 0.7          | #DIV/0! |
| PNRC2     | 0.04761904762 | 0.04761904762 | 0.1111111111  |  | 0.325        | #DIV/0! |
| POC1A     | 0.04761904762 | 0.04761904762 | 0             |  | inf          | #DIV/0! |
| POC1B     | 0.04761904762 | 0.04761904762 | 0.05555555556 |  | 0.7          | #DIV/0! |
| POC1B-AS  | 0.04761904762 | 0.04761904762 | 0.05555555556 |  | 0.7          | #DIV/0! |
| POC1B-GAL | 0.04761904762 | 0.04761904762 | 0.05555555556 |  | 0.7          | #DIV/0! |
| POC5      | 0.04761904762 | 0.04761904762 | 0             |  | inf          | #DIV/0! |
| PODN      | 0.04761904762 | 0.04761904762 | 0.05555555556 |  | 0.7          | #DIV/0! |
| PODNL1    | 0.1428571429  | 0.1428571429  | 0.1111111111  |  | 1.083333333  | #DIV/0! |
| PODXL     | 0.04761904762 | 0.04761904762 | 0.05555555556 |  | 0.7          | #DIV/0! |
| POFUT1    | 0.09523809524 | 0.09523809524 | 0.1111111111  |  | 0.6842105263 | #DIV/0! |
| POFUT2    | 0.04761904762 | 0.04761904762 | 0.1111111111  |  | 0.325        | #DIV/0! |
| POGK      | 0.1428571429  | 0.1428571429  | 0             |  | inf          | #DIV/0! |
| POGZ      | 0.1904761905  | 0.1904761905  | 0.05555555556 |  | 3.294117647  | #DIV/0! |
| POLB      | 0.09523809524 | 0.09523809524 | 0.1666666667  |  | 0.4210526316 | #DIV/0! |
| POLD1     | 0.09523809524 | 0.09523809524 | 0.1111111111  |  | 0.6842105263 | #DIV/0! |
| POLD2     | 0.04761904762 | 0.04761904762 | 0.1666666667  |  | 0.2          | #DIV/0! |
| POLDIP2   | 0.04761904762 | 0.04761904762 | 0.05555555556 |  | 0.7          | #DIV/0! |
| POLE      | 0.09523809524 | 0.09523809524 | 0.05555555556 |  | 1.473684211  | #DIV/0! |
| POLE2     | 0.04761904762 | 0.04761904762 | 0             |  | inf          | #DIV/0! |
| POLE3     | 0.04761904762 | 0.04761904762 | 0.05555555556 |  | 0.7          | #DIV/0! |
| POLE4     | 0             | 0             | 0.05555555556 |  | 0            | #DIV/0! |
| POLG      | 0.04761904762 | 0.04761904762 | 0.05555555556 |  | 0.7          | #DIV/0! |
| POLG2     | 0.04761904762 | 0.04761904762 | 0             |  | inf          | #DIV/0! |
| POLH      | 0.04761904762 | 0.04761904762 | 0.05555555556 |  | 0.7          | #DIV/0! |
| POLI      | 0.09523809524 | 0.09523809524 | 0             |  | inf          | #DIV/0! |
| POLK      | 0.04761904762 | 0.04761904762 | 0             |  | inf          | #DIV/0! |
| POLL      | 0.1428571429  | 0.1428571429  | 0             |  | inf          | #DIV/0! |
| POLM      | 0.04761904762 | 0.04761904762 | 0.1666666667  |  | 0.2          | #DIV/0! |
| POLN      | 0.04761904762 | 0.04761904762 | 0             |  | inf          | #DIV/0! |
| POLQ      | 0.1428571429  | 0.1428571429  | 0.05555555556 |  | 2.333333333  | #DIV/0! |
| POLR1A    | 0             | 0             | 0.05555555556 |  | 0            | #DIV/0! |
| POLR1B    | 0             | 0             | 0.05555555556 |  | 0            | #DIV/0! |
| POLR1C    | 0.04761904762 | 0.04761904762 | 0.05555555556 |  | 0.7          | #DIV/0! |
| POLR1E    | 0.09523809524 | 0.09523809524 | 0.05555555556 |  | 1.473684211  | #DIV/0! |
| POLR2A    | 0             | 0             | 0.05555555556 |  | 0            | #DIV/0! |
| POLR2B    | 0.1904761905  | 0.1904761905  | 0.05555555556 |  | 3.294117647  | #DIV/0! |
| POLR2C    | 0.04761904762 | 0.04761904762 | 0             |  | inf          | #DIV/0! |
| POLR2D    | 0             | 0             | 0.05555555556 |  | 0            | #DIV/0! |

|        |               |               |               |  |              |         |
|--------|---------------|---------------|---------------|--|--------------|---------|
| POLR2E | 0.09523809524 | 0.09523809524 | 0.1111111111  |  | 0.6842105263 | #DIV/0! |
| POLR2F | 0.04761904762 | 0.04761904762 | 0.1111111111  |  | 0.325        | #DIV/0! |
| POLR2H | 0.1428571429  | 0.1428571429  | 0.05555555556 |  | 2.333333333  | #DIV/0! |
| POLR2I | 0.04761904762 | 0.04761904762 | 0.05555555556 |  | 0.7          | #DIV/0! |
| POLR2J | 0.04761904762 | 0.04761904762 | 0.05555555556 |  | 0.7          | #DIV/0! |
| POLR2K | 0.04761904762 | 0.04761904762 | 0.05555555556 |  | 0.7          | #DIV/0! |
| POLR2L | 0.04761904762 | 0.04761904762 | 0.05555555556 |  | 0.7          | #DIV/0! |
| POLR2M | 0.04761904762 | 0.04761904762 | 0.1666666667  |  | 0.2          | #DIV/0! |
| POLR2N | 0.1904761905  | 0.1904761905  | 0.1111111111  |  | 1.529411765  | #DIV/0! |
| POLR2O | 0.04761904762 | 0.04761904762 | 0             |  | inf          | #DIV/0! |
| POLR2P | 0.04761904762 | 0.04761904762 | 0.05555555556 |  | 0.7          | #DIV/0! |
| POLR3A | 0.1428571429  | 0.1428571429  | 0.05555555556 |  | 2.333333333  | #DIV/0! |
| POLR3B | 0.04761904762 | 0.04761904762 | 0.05555555556 |  | 0.7          | #DIV/0! |
| POLR3C | 0.1428571429  | 0.1428571429  | 0.05555555556 |  | 2.333333333  | #DIV/0! |
| POLR3D | 0.09523809524 | 0.09523809524 | 0.1111111111  |  | 0.6842105263 | #DIV/0! |
| POLR3E | 0.04761904762 | 0.04761904762 | 0             |  | inf          | #DIV/0! |
| POLR3F | 0.1904761905  | 0.1904761905  | 0.05555555556 |  | 3.294117647  | #DIV/0! |
| POLR3G | 0.04761904762 | 0.04761904762 | 0             |  | inf          | #DIV/0! |
| POLR3H | 0             | 0             | 0.1111111111  |  | 0            | #DIV/0! |
| POLR3I | 0.04761904762 | 0.04761904762 | 0.2222222222  |  | 0.1375       | #DIV/0! |
| POLR3J | 0.09523809524 | 0.09523809524 | 0.1111111111  |  | 0.6842105263 | #DIV/0! |
| POLR3K | 0.1428571429  | 0.1428571429  | 0.1111111111  |  | 1.083333333  | #DIV/0! |
| POLR3L | 0.1428571429  | 0.1428571429  | 0.1666666667  |  | 0.6666666667 | #DIV/0! |
| POLR3M | 0.04761904762 | 0.04761904762 | 0.1111111111  |  | 0.325        | #DIV/0! |
| POLR3N | 0.1428571429  | 0.1428571429  | 0.1666666667  |  | 0.6666666667 | #DIV/0! |
| POLR3O | 0.04761904762 | 0.04761904762 | 0.05555555556 |  | 0.7          | #DIV/0! |
| POLR3P | 0.04761904762 | 0.04761904762 | 0.05555555556 |  | 0.7          | #DIV/0! |
| POLR3Q | 0.04761904762 | 0.04761904762 | 0.05555555556 |  | 0.7          | #DIV/0! |
| POLR3R | 0.04761904762 | 0.04761904762 | 0.1111111111  |  | 0.325        | #DIV/0! |
| POLR3S | 0.04761904762 | 0.04761904762 | 0.05555555556 |  | 0.7          | #DIV/0! |
| POLR3T | 0.04761904762 | 0.04761904762 | 0             |  | inf          | #DIV/0! |
| POLR3U | 0.09523809524 | 0.09523809524 | 0.1666666667  |  | 0.4210526316 | #DIV/0! |
| POLR3V | 0.09523809524 | 0.09523809524 | 0.05555555556 |  | 1.473684211  | #DIV/0! |
| POLR3W | 0.09523809524 | 0.09523809524 | 0.1111111111  |  | 0.6842105263 | #DIV/0! |
| POLR3X | 0.04761904762 | 0.04761904762 | 0.1111111111  |  | 0.325        | #DIV/0! |
| POLR3Y | 0.04761904762 | 0.04761904762 | 0.1111111111  |  | 0.325        | #DIV/0! |
| POLR3Z | 0.04761904762 | 0.04761904762 | 0.1111111111  |  | 0.325        | #DIV/0! |
| POLR4A | 0.1904761905  | 0.1904761905  | 0.1111111111  |  | 1.529411765  | #DIV/0! |
| POLR4B | 0.04761904762 | 0.04761904762 | 0.1666666667  |  | 0.2          | #DIV/0! |
| POLR4C | 0             | 0             | 0.1111111111  |  | 0            | #DIV/0! |
| POLR4D | 0.04761904762 | 0.04761904762 | 0.05555555556 |  | 0.7          | #DIV/0! |
| POLR4E | 0.09523809524 | 0.09523809524 | 0.05555555556 |  | 1.473684211  | #DIV/0! |
| POLR4F | 0.1428571429  | 0.1428571429  | 0.1111111111  |  | 1.083333333  | #DIV/0! |
| POLR4G | 0.04761904762 | 0.04761904762 | 0.05555555556 |  | 0.7          | #DIV/0! |
| POLR4H | 0.04761904762 | 0.04761904762 | 0.05555555556 |  | 0.7          | #DIV/0! |
| POLR4I | 0.04761904762 | 0.04761904762 | 0.05555555556 |  | 0.7          | #DIV/0! |
| POLR4J | 0.04761904762 | 0.04761904762 | 0.1111111111  |  | 0.325        | #DIV/0! |
| POLR4K | 0.04761904762 | 0.04761904762 | 0.05555555556 |  | 0.7          | #DIV/0! |
| POLR4L | 0.04761904762 | 0.04761904762 | 0             |  | inf          | #DIV/0! |
| POM1   | 0.1428571429  | 0.1428571429  | 0.1111111111  |  | 1.083333333  | #DIV/0! |
| POM2   | 0.1428571429  | 0.1428571429  | 0.1666666667  |  | 0.6666666667 | #DIV/0! |
| POM3   | 0.04761904762 | 0.04761904762 | 0.1111111111  |  | 0.325        | #DIV/0! |
| POM4   | 0.1428571429  | 0.1428571429  | 0.1666666667  |  | 0.6666666667 | #DIV/0! |
| POM5   | 0.04761904762 | 0.04761904762 | 0.05555555556 |  | 0.7          | #DIV/0! |
| POM6   | 0.04761904762 | 0.04761904762 | 0.05555555556 |  | 0.7          | #DIV/0! |
| POM7   | 0.04761904762 | 0.04761904762 | 0.05555555556 |  | 0.7          | #DIV/0! |
| POM8   | 0.04761904762 | 0.04761904762 | 0.1111111111  |  | 0.325        | #DIV/0! |
| POM9   | 0.04761904762 | 0.04761904762 | 0.05555555556 |  | 0.7          | #DIV/0! |
| POM10  | 0.04761904762 | 0.04761904762 | 0             |  | inf          | #DIV/0! |
| POM11  | 0.09523809524 | 0.09523809524 | 0.1666666667  |  | 0.4210526316 | #DIV/0! |
| POM12  | 0.09523809524 | 0.09523809524 | 0.05555555556 |  | 1.473684211  | #DIV/0! |
| POM13  | 0.09523809524 | 0.09523809524 | 0.1111111111  |  | 0.6842105263 | #DIV/0! |
| POM14  | 0.04761904762 | 0.04761904762 | 0.1111111111  |  | 0.325        | #DIV/0! |
| POM15  | 0.04761904762 | 0.04761904762 | 0.1111111111  |  | 0.325        | #DIV/0! |
| POM16  | 0.04761904762 | 0.04761904762 | 0.1111111111  |  | 0.325        | #DIV/0! |
| POM17  | 0.1904761905  | 0.1904761905  | 0.1111111111  |  | 1.529411765  | #DIV/0! |
| POM18  | 0.04761904762 | 0.04761904762 | 0.1666666667  |  | 0.2          | #DIV/0! |
| POM19  | 0             | 0             | 0.1111111111  |  | 0            | #DIV/0! |
| POM20  | 0.04761904762 | 0.04761904762 | 0.05555555556 |  | 0.7          | #DIV/0! |
| POM21  | 0.09523809524 | 0.09523809524 | 0.05555555556 |  | 1.473684211  | #DIV/0! |
| POM22  | 0.1428571429  | 0.1428571429  | 0.1111111111  |  | 1.083333333  | #DIV/0! |
| POM23  | 0.04761904762 | 0.04761904762 | 0.05555555556 |  | 0.7          | #DIV/0! |
| POM24  | 0.04761904762 | 0.04761904762 | 0.05555555556 |  | 0.7          | #DIV/0! |
| POM25  | 0.04761904762 | 0.04761904762 | 0.05555555556 |  | 0.7          | #DIV/0! |
| POM26  | 0.04761904762 | 0.04761904762 | 0.1111111111  |  | 0.325        | #DIV/0! |
| POM27  | 0.04761904762 | 0.04761904762 | 0.05555555556 |  | 0.7          | #DIV/0! |
| POM28  | 0.04761904762 | 0.04761904762 | 0             |  | inf          | #DIV/0! |
| POM29  | 0.09523809524 | 0.09523809524 | 0.1666666667  |  | 0.4210526316 | #DIV/0! |
| POM30  | 0.2857142857  | 0.2857142857  | 0.1111111111  |  | 2.6          | #DIV/0! |
| POM31  | 0.2857142857  | 0.2857142857  | 0.1111111111  |  | 2.6          | #DIV/0! |
| POM32  | 0.2857142857  | 0.2857142857  | 0.1111111111  |  | 2.6          | #DIV/0! |
| POM33  | 0.09523809524 | 0.09523809524 | 0.05555555556 |  | 1.473684211  | #DIV/0! |
| POM34  | 0.04761904762 | 0.04761904762 | 0             |  | inf          | #DIV/0! |

|           |               |               |               |  |              |         |
|-----------|---------------|---------------|---------------|--|--------------|---------|
| POTEE     | 0             | 0             | 0.05555555556 |  | 0            | #DIV/0! |
| POTEF     | 0             | 0             | 0.05555555556 |  | 0            | #DIV/0! |
| POTEG     | 0.1428571429  | 0.1428571429  | 0.1111111111  |  | 1.083333333  | #DIV/0! |
| POTEH     | 0.09523809524 | 0.09523809524 | 0.05555555556 |  | 1.473684211  | #DIV/0! |
| PTEH-A    | 0.1904761905  | 0.1904761905  | 0.1111111111  |  | 1.529411765  | #DIV/0! |
| POTEI     | 0             | 0             | 0.05555555556 |  | 0            | #DIV/0! |
| POTEJ     | 0             | 0             | 0.05555555556 |  | 0            | #DIV/0! |
| POTEKI    | 0             | 0             | 0.05555555556 |  | 0            | #DIV/0! |
| POTEM     | 0.1428571429  | 0.1428571429  | 0.1111111111  |  | 1.083333333  | #DIV/0! |
| POU1F1    | 0.04761904762 | 0.04761904762 | 0             |  | inf          | #DIV/0! |
| POU2F1    | 0.1428571429  | 0.1428571429  | 0             |  | inf          | #DIV/0! |
| POU2F2    | 0.04761904762 | 0.04761904762 | 0.05555555556 |  | 0.7          | #DIV/0! |
| POU3F1    | 0.04761904762 | 0.04761904762 | 0.05555555556 |  | 0.7          | #DIV/0! |
| POU3F3    | 0             | 0             | 0.05555555556 |  | 0            | #DIV/0! |
| POU4F2    | 0             | 0             | 0.05555555556 |  | 0            | #DIV/0! |
| POU5F1    | 0.09523809524 | 0.09523809524 | 0.1111111111  |  | 0.6842105263 | #DIV/0! |
| POU5F1P   | 0.04761904762 | 0.04761904762 | 0.1111111111  |  | 0.325        | #DIV/0! |
| POU5F1P   | 0.1904761905  | 0.1904761905  | 0.1111111111  |  | 1.529411765  | #DIV/0! |
| POU5F1P   | 0.1904761905  | 0.1904761905  | 0.05555555556 |  | 3.294117647  | #DIV/0! |
| POU5F2    | 0.04761904762 | 0.04761904762 | 0             |  | inf          | #DIV/0! |
| POU6F1    | 0.09523809524 | 0.09523809524 | 0.05555555556 |  | 1.473684211  | #DIV/0! |
| POU6F2    | 0.04761904762 | 0.04761904762 | 0.2222222222  |  | 0.1375       | #DIV/0! |
| POU6F2-A  | 0.04761904762 | 0.04761904762 | 0.2222222222  |  | 0.1375       | #DIV/0! |
| POU6F2-A  | 0.04761904762 | 0.04761904762 | 0.2222222222  |  | 0.1375       | #DIV/0! |
| PP12613   | 0             | 0             | 0.05555555556 |  | 0            | #DIV/0! |
| PP2672    | 0.09523809524 | 0.09523809524 | 0.05555555556 |  | 1.473684211  | #DIV/0! |
| PP2D1     | 0.04761904762 | 0.04761904762 | 0             |  | inf          | #DIV/0! |
| PP7080    | 0             | 0             | 0.05555555556 |  | 0            | #DIV/0! |
| PPA1      | 0.09523809524 | 0.09523809524 | 0             |  | inf          | #DIV/0! |
| PPA2      | 0             | 0             | 0.05555555556 |  | 0            | #DIV/0! |
| PPAN      | 0.1428571429  | 0.1428571429  | 0.1111111111  |  | 1.083333333  | #DIV/0! |
| PPAN-P2RY | 0.1428571429  | 0.1428571429  | 0.1111111111  |  | 1.083333333  | #DIV/0! |
| PPARA     | 0             | 0             | 0.1111111111  |  | 0            | #DIV/0! |
| PPARD     | 0.04761904762 | 0.04761904762 | 0.05555555556 |  | 0.7          | #DIV/0! |
| PPARG     | 0.09523809524 | 0.09523809524 | 0             |  | inf          | #DIV/0! |
| PPAT      | 0.1904761905  | 0.1904761905  | 0.05555555556 |  | 3.294117647  | #DIV/0! |
| PPBP      | 0.09523809524 | 0.09523809524 | 0.05555555556 |  | 1.473684211  | #DIV/0! |
| PPBPP2    | 0.09523809524 | 0.09523809524 | 0.05555555556 |  | 1.473684211  | #DIV/0! |
| PPCDC     | 0.04761904762 | 0.04761904762 | 0.05555555556 |  | 0.7          | #DIV/0! |
| PPCS      | 0.04761904762 | 0.04761904762 | 0.05555555556 |  | 0.7          | #DIV/0! |
| PPDPF     | 0.1428571429  | 0.1428571429  | 0.2222222222  |  | 0.4583333333 | #DIV/0! |
| PPDPF1    | 0.09523809524 | 0.09523809524 | 0.1111111111  |  | 0.6842105263 | #DIV/0! |
| PPEF2     | 0.04761904762 | 0.04761904762 | 0.05555555556 |  | 0.7          | #DIV/0! |
| PPFIA2    | 0.04761904762 | 0.04761904762 | 0.05555555556 |  | 0.7          | #DIV/0! |
| PPFIA2-A  | 0.04761904762 | 0.04761904762 | 0.05555555556 |  | 0.7          | #DIV/0! |
| PPFIA3    | 0.09523809524 | 0.09523809524 | 0.1111111111  |  | 0.6842105263 | #DIV/0! |
| PPFIA4    | 0.1428571429  | 0.1428571429  | 0             |  | inf          | #DIV/0! |
| PPFIBP1   | 0.04761904762 | 0.04761904762 | 0.05555555556 |  | 0.7          | #DIV/0! |
| PPFIBP2   | 0.04761904762 | 0.04761904762 | 0             |  | inf          | #DIV/0! |
| PPHLN1    | 0.04761904762 | 0.04761904762 | 0.1111111111  |  | 0.325        | #DIV/0! |
| PPIA      | 0.04761904762 | 0.04761904762 | 0.2222222222  |  | 0.1375       | #DIV/0! |



|         |               |               |               |  |              |         |
|---------|---------------|---------------|---------------|--|--------------|---------|
| PPIAL4A | 0.1428571429  | 0.1428571429  | 0.05555555556 |  | 2.333333333  | #DIV/0! |
| PPIAL4C | 0.1428571429  | 0.1428571429  | 0.05555555556 |  | 2.333333333  | #DIV/0! |
| PPIAL4I | 0.1428571429  | 0.1428571429  | 0.05555555556 |  | 2.333333333  | #DIV/0! |
| PPIAL4F | 0.1428571429  | 0.1428571429  | 0.05555555556 |  | 2.333333333  | #DIV/0! |
| PPIAL4I | 0.1428571429  | 0.1428571429  | 0.05555555556 |  | 2.333333333  | #DIV/0! |
| PPIAL4C | 0.09523809524 | 0.09523809524 | 0.05555555556 |  | 1.473684211  | #DIV/0! |
| PPIAL4F | 0.1428571429  | 0.1428571429  | 0.05555555556 |  | 2.333333333  | #DIV/0! |
| PPIAP3C | 0.09523809524 | 0.09523809524 | 0.1111111111  |  | 0.6842105263 | #DIV/0! |
| PPIAP4C | 0.04761904762 | 0.04761904762 | 0.05555555556 |  | 0.7          | #DIV/0! |
| PPIB    | 0.04761904762 | 0.04761904762 | 0.05555555556 |  | 0.7          | #DIV/0! |
| PPIC    | 0.04761904762 | 0.04761904762 | 0             |  | inf          | #DIV/0! |
| PPID    | 0             | 0             | 0.05555555556 |  | 0            | #DIV/0! |
| PPIE    | 0.04761904762 | 0.04761904762 | 0.05555555556 |  | 0.7          | #DIV/0! |
| PPIEL   | 0.04761904762 | 0.04761904762 | 0.05555555556 |  | 0.7          | #DIV/0! |
| PPIF    | 0.1428571429  | 0.1428571429  | 0.05555555556 |  | 2.333333333  | #DIV/0! |
| PPIG    | 0             | 0             | 0.05555555556 |  | 0            | #DIV/0! |
| PPIH    | 0.04761904762 | 0.04761904762 | 0.05555555556 |  | 0.7          | #DIV/0! |
| PPIL1   | 0.04761904762 | 0.04761904762 | 0.05555555556 |  | 0.7          | #DIV/0! |
| PPIL2   | 0.04761904762 | 0.04761904762 | 0.05555555556 |  | 0.7          | #DIV/0! |
| PPIL3   | 0             | 0             | 0.05555555556 |  | 0            | #DIV/0! |
| PPIL4   | 0             | 0             | 0             |  |              | #DIV/0! |
| PPIL6   | 0             | 0             | 0             |  |              | #DIV/0! |
| PIP5K2  | 0.04761904762 | 0.04761904762 | 0             |  | inf          | #DIV/0! |
| PPL     | 0.04761904762 | 0.04761904762 | 0             |  | inf          | #DIV/0! |
| PPM1B   | 0             | 0             | 0.05555555556 |  | 0            | #DIV/0! |
| PPM1D   | 0.1428571429  | 0.1428571429  | 0             |  | inf          | #DIV/0! |
| PPM1E   | 0.1428571429  | 0.1428571429  | 0             |  | inf          | #DIV/0! |
| PPM1F   | 0.04761904762 | 0.04761904762 | 0.05555555556 |  | 0.7          | #DIV/0! |
| PPM1H   | 0.09523809524 | 0.09523809524 | 0.05555555556 |  | 1.473684211  | #DIV/0! |
| PPM1J   | 0.04761904762 | 0.04761904762 | 0.05555555556 |  | 0.7          | #DIV/0! |
| PPM1K   | 0             | 0             | 0.05555555556 |  | 0            | #DIV/0! |
| PM1K-D  | 0             | 0             | 0.05555555556 |  | 0            | #DIV/0! |
| PPM1L   | 0.1428571429  | 0.1428571429  | 0.05555555556 |  | 2.333333333  | #DIV/0! |
| PPM1N   | 0.09523809524 | 0.09523809524 | 0.1111111111  |  | 0.6842105263 | #DIV/0! |
| PPOX    | 0.1428571429  | 0.1428571429  | 0             |  | inf          | #DIV/0! |
| PPP1CB  | 0             | 0             | 0.05555555556 |  | 0            | #DIV/0! |
| PPP1CC  | 0             | 0             | 0.1111111111  |  | 0            | #DIV/0! |
| PP1R12  | 0.04761904762 | 0.04761904762 | 0.05555555556 |  | 0.7          | #DIV/0! |
| 1R12A-  | 0.04761904762 | 0.04761904762 | 0.05555555556 |  | 0.7          | #DIV/0! |
| PP1R12  | 0.1428571429  | 0.1428571429  | 0             |  | inf          | #DIV/0! |
| PP1R12C | 0.09523809524 | 0.09523809524 | 0.05555555556 |  | 1.473684211  | #DIV/0! |
| PP1R13  | 0.09523809524 | 0.09523809524 | 0.1111111111  |  | 0.6842105263 | #DIV/0! |
| PP1R14  | 0.04761904762 | 0.04761904762 | 0.05555555556 |  | 0.7          | #DIV/0! |
| PP1R15  | 0.09523809524 | 0.09523809524 | 0.1111111111  |  | 0.6842105263 | #DIV/0! |
| PP1R15  | 0.2380952381  | 0.2380952381  | 0             |  | inf          | #DIV/0! |
| PP1R16  | 0.04761904762 | 0.04761904762 | 0.1666666667  |  | 0.2          | #DIV/0! |
| PP1R16  | 0.1428571429  | 0.1428571429  | 0.2222222222  |  | 0.4583333333 | #DIV/0! |
| PP1R17  | 0.09523809524 | 0.09523809524 | 0.1111111111  |  | 0.6842105263 | #DIV/0! |
| PP1R1H  | 0.09523809524 | 0.09523809524 | 0             |  | inf          | #DIV/0! |
| PP1R1C  | 0             | 0             | 0.05555555556 |  | 0            | #DIV/0! |
| PPP1R2  | 0.1428571429  | 0.1428571429  | 0.05555555556 |  | 2.333333333  | #DIV/0! |

|         |               |               |               |  |              |         |
|---------|---------------|---------------|---------------|--|--------------|---------|
| PPP1R21 | 0             | 0             | 0.05555555556 |  | 0            | #DIV/0! |
| PPP1R26 | 0.04761904762 | 0.04761904762 | 0             |  | inf          | #DIV/0! |
| P1R26-A | 0.04761904762 | 0.04761904762 | 0             |  | inf          | #DIV/0! |
| PPP1R27 | 0.04761904762 | 0.04761904762 | 0             |  | inf          | #DIV/0! |
| PPP1R28 | 0.04761904762 | 0.04761904762 | 0.05555555556 |  | 0.7          | #DIV/0! |
| PPP1R29 | 0.04761904762 | 0.04761904762 | 0.16666666667 |  | 0.2          | #DIV/0! |
| PPP1R35 | 0.04761904762 | 0.04761904762 | 0.05555555556 |  | 0.7          | #DIV/0! |
| PPP1R36 | 0.09523809524 | 0.09523809524 | 0             |  | inf          | #DIV/0! |
| PPP1R37 | 0.09523809524 | 0.09523809524 | 0.11111111111 |  | 0.6842105263 | #DIV/0! |
| PPP1R3A | 0.04761904762 | 0.04761904762 | 0.05555555556 |  | 0.7          | #DIV/0! |
| PPP1R3H | 0.09523809524 | 0.09523809524 | 0.11111111111 |  | 0.6842105263 | #DIV/0! |
| PPP1R3C | 0.1428571429  | 0.1428571429  | 0.11111111111 |  | 1.083333333  | #DIV/0! |
| PPP1R3I | 0.1428571429  | 0.1428571429  | 0.16666666667 |  | 0.6666666667 | #DIV/0! |
| PPP1R3H | 0             | 0             | 0.11111111111 |  | 0            | #DIV/0! |
| PPP1R42 | 0.1428571429  | 0.1428571429  | 0.16666666667 |  | 0.6666666667 | #DIV/0! |
| PPP1R7  | 0             | 0             | 0.05555555556 |  | 0            | #DIV/0! |
| PPP1R8  | 0.04761904762 | 0.04761904762 | 0.11111111111 |  | 0.325        | #DIV/0! |
| PPP1R9A | 0.04761904762 | 0.04761904762 | 0.11111111111 |  | 0.325        | #DIV/0! |
| PPP1R9H | 0.09523809524 | 0.09523809524 | 0             |  | inf          | #DIV/0! |
| PPP2CA  | 0.04761904762 | 0.04761904762 | 0             |  | inf          | #DIV/0! |
| PPP2CB  | 0.04761904762 | 0.04761904762 | 0.11111111111 |  | 0.325        | #DIV/0! |
| PPP2R1A | 0.09523809524 | 0.09523809524 | 0.05555555556 |  | 1.473684211  | #DIV/0! |
| PPP2R2A | 0.04761904762 | 0.04761904762 | 0.11111111111 |  | 0.325        | #DIV/0! |
| PPP2R2H | 0.2380952381  | 0.2380952381  | 0             |  | inf          | #DIV/0! |
| PPP2R3A | 0.1904761905  | 0.1904761905  | 0.05555555556 |  | 3.294117647  | #DIV/0! |
| PPP2R3C | 0.09523809524 | 0.09523809524 | 0             |  | inf          | #DIV/0! |
| PPP2R5A | 0.09523809524 | 0.09523809524 | 0             |  | inf          | #DIV/0! |
| PPP2R5H | 0.04761904762 | 0.04761904762 | 0.05555555556 |  | 0.7          | #DIV/0! |
| PPP2R5I | 0.09523809524 | 0.09523809524 | 0             |  | inf          | #DIV/0! |
| PPP3CA  | 0             | 0             | 0.05555555556 |  | 0            | #DIV/0! |
| PPP3CB  | 0.1904761905  | 0.1904761905  | 0.05555555556 |  | 3.294117647  | #DIV/0! |
| P3CB-A  | 0.1904761905  | 0.1904761905  | 0.05555555556 |  | 3.294117647  | #DIV/0! |
| PPP3CC  | 0.09523809524 | 0.09523809524 | 0.11111111111 |  | 0.6842105263 | #DIV/0! |
| PPP3R1  | 0             | 0             | 0.05555555556 |  | 0            | #DIV/0! |
| PPP3R2  | 0.04761904762 | 0.04761904762 | 0             |  | inf          | #DIV/0! |
| PPP4C   | 0.04761904762 | 0.04761904762 | 0             |  | inf          | #DIV/0! |
| PPP4R1  | 0.09523809524 | 0.09523809524 | 0             |  | inf          | #DIV/0! |
| P4R1-A  | 0.09523809524 | 0.09523809524 | 0             |  | inf          | #DIV/0! |
| PPP4R1H | 0.1428571429  | 0.1428571429  | 0.22222222222 |  | 0.4583333333 | #DIV/0! |
| PPP4R2  | 0.04761904762 | 0.04761904762 | 0             |  | inf          | #DIV/0! |
| PPP4R3H | 0.04761904762 | 0.04761904762 | 0.05555555556 |  | 0.7          | #DIV/0! |
| PPP5C   | 0.09523809524 | 0.09523809524 | 0.11111111111 |  | 0.6842105263 | #DIV/0! |
| PPP5D1  | 0.09523809524 | 0.09523809524 | 0.11111111111 |  | 0.6842105263 | #DIV/0! |
| PPP6C   | 0.09523809524 | 0.09523809524 | 0.05555555556 |  | 1.473684211  | #DIV/0! |
| PPP6R1  | 0.09523809524 | 0.09523809524 | 0.05555555556 |  | 1.473684211  | #DIV/0! |
| PPP6R2  | 0             | 0             | 0.11111111111 |  | 0            | #DIV/0! |
| PPRC1   | 0.1428571429  | 0.1428571429  | 0.05555555556 |  | 2.333333333  | #DIV/0! |
| PPT1    | 0.04761904762 | 0.04761904762 | 0.05555555556 |  | 0.7          | #DIV/0! |
| PPT2    | 0.04761904762 | 0.04761904762 | 0             |  | inf          | #DIV/0! |
| T2-EGF  | 0.04761904762 | 0.04761904762 | 0             |  | inf          | #DIV/0! |
| PPTC7   | 0             | 0             | 0.11111111111 |  | 0            | #DIV/0! |



|         |               |               |               |  |              |         |
|---------|---------------|---------------|---------------|--|--------------|---------|
| PRDM16  | 0             | 0             | 0.05555555556 |  | 0            | #DIV/0! |
| DM16-I  | 0             | 0             | 0.05555555556 |  | 0            | #DIV/0! |
| PRDM2   | 0.04761904762 | 0.04761904762 | 0.11111111111 |  | 0.325        | #DIV/0! |
| PRDM4   | 0.04761904762 | 0.04761904762 | 0.05555555556 |  | 0.7          | #DIV/0! |
| PRDM5   | 0             | 0             | 0.05555555556 |  | 0            | #DIV/0! |
| PRDM6   | 0.04761904762 | 0.04761904762 | 0             |  | inf          | #DIV/0! |
| PRDM7   | 0.09523809524 | 0.09523809524 | 0             |  | inf          | #DIV/0! |
| PRDM8   | 0.04761904762 | 0.04761904762 | 0.05555555556 |  | 0.7          | #DIV/0! |
| PRDM9   | 0.04761904762 | 0.04761904762 | 0.05555555556 |  | 0.7          | #DIV/0! |
| PRDX1   | 0.04761904762 | 0.04761904762 | 0.05555555556 |  | 0.7          | #DIV/0! |
| PRDX2   | 0.1428571429  | 0.1428571429  | 0.11111111111 |  | 1.083333333  | #DIV/0! |
| PRDX3   | 0.2380952381  | 0.2380952381  | 0             |  | inf          | #DIV/0! |
| PRDX6   | 0.1428571429  | 0.1428571429  | 0             |  | inf          | #DIV/0! |
| RELID0  | 0.09523809524 | 0.09523809524 | 0.05555555556 |  | 1.473684211  | #DIV/0! |
| RELID3  | 0.09523809524 | 0.09523809524 | 0.05555555556 |  | 1.473684211  | #DIV/0! |
| RELID3  | 0.1428571429  | 0.1428571429  | 0.22222222222 |  | 0.4583333333 | #DIV/0! |
| PRELP   | 0.1904761905  | 0.1904761905  | 0             |  | inf          | #DIV/0! |
| PREPL   | 0             | 0             | 0.05555555556 |  | 0            | #DIV/0! |
| PREX1   | 0.1428571429  | 0.1428571429  | 0.16666666667 |  | 0.6666666667 | #DIV/0! |
| PREX2   | 0.1428571429  | 0.1428571429  | 0.16666666667 |  | 0.6666666667 | #DIV/0! |
| PRF1    | 0.09523809524 | 0.09523809524 | 0             |  | inf          | #DIV/0! |
| PRG1    | 0.04761904762 | 0.04761904762 | 0.05555555556 |  | 0.7          | #DIV/0! |
| PRG4    | 0.1428571429  | 0.1428571429  | 0.05555555556 |  | 2.333333333  | #DIV/0! |
| PRH1    | 0.04761904762 | 0.04761904762 | 0.11111111111 |  | 0.325        | #DIV/0! |
| RH1-PRH | 0.04761904762 | 0.04761904762 | 0.11111111111 |  | 0.325        | #DIV/0! |
| II-TAS2 | 0.04761904762 | 0.04761904762 | 0.11111111111 |  | 0.325        | #DIV/0! |
| PRH2    | 0.04761904762 | 0.04761904762 | 0.11111111111 |  | 0.325        | #DIV/0! |
| RICKLE  | 0.04761904762 | 0.04761904762 | 0.11111111111 |  | 0.325        | #DIV/0! |
| RICKLE  | 0.04761904762 | 0.04761904762 | 0             |  | inf          | #DIV/0! |
| CKLE2-  | 0.04761904762 | 0.04761904762 | 0             |  | inf          | #DIV/0! |
| CKLE2-  | 0.04761904762 | 0.04761904762 | 0             |  | inf          | #DIV/0! |
| CKLE2-  | 0.04761904762 | 0.04761904762 | 0             |  | inf          | #DIV/0! |
| RICKLE  | 0.04761904762 | 0.04761904762 | 0.05555555556 |  | 0.7          | #DIV/0! |
| PRIM1   | 0.1428571429  | 0.1428571429  | 0.05555555556 |  | 2.333333333  | #DIV/0! |
| PRIM2   | 0.04761904762 | 0.04761904762 | 0.05555555556 |  | 0.7          | #DIV/0! |
| RIMPO   | 0             | 0             | 0.05555555556 |  | 0            | #DIV/0! |
| PRKAA1  | 0.04761904762 | 0.04761904762 | 0.05555555556 |  | 0.7          | #DIV/0! |
| PRKAA2  | 0.04761904762 | 0.04761904762 | 0.05555555556 |  | 0.7          | #DIV/0! |
| PRKAB1  | 0             | 0             | 0.05555555556 |  | 0            | #DIV/0! |
| PRKAB2  | 0.1428571429  | 0.1428571429  | 0.05555555556 |  | 2.333333333  | #DIV/0! |
| PRKAC1  | 0.1428571429  | 0.1428571429  | 0.11111111111 |  | 1.083333333  | #DIV/0! |
| PRKAC1  | 0.04761904762 | 0.04761904762 | 0.05555555556 |  | 0.7          | #DIV/0! |
| PRKACC  | 0             | 0             | 0.05555555556 |  | 0            | #DIV/0! |
| PRKAG1  | 0.04761904762 | 0.04761904762 | 0.05555555556 |  | 0.7          | #DIV/0! |
| PRKAG2  | 0.09523809524 | 0.09523809524 | 0.05555555556 |  | 1.473684211  | #DIV/0! |
| KAG2-A  | 0.09523809524 | 0.09523809524 | 0.05555555556 |  | 1.473684211  | #DIV/0! |
| PRKAG3  | 0             | 0             | 0.05555555556 |  | 0            | #DIV/0! |
| RKAR1   | 0             | 0             | 0             |  |              | #DIV/0! |
| RKAR1   | 0.04761904762 | 0.04761904762 | 0.16666666667 |  | 0.2          | #DIV/0! |
| RKAR2   | 0.09523809524 | 0.09523809524 | 0             |  | inf          | #DIV/0! |
| KAR2A-  | 0.09523809524 | 0.09523809524 | 0             |  | inf          | #DIV/0! |

|         |               |               |               |  |              |         |
|---------|---------------|---------------|---------------|--|--------------|---------|
| PKAR2   | 0.04761904762 | 0.04761904762 | 0.05555555556 |  | 0.7          | #DIV/0! |
| PKCA    | 0             | 0             | 0             |  |              | #DIV/0! |
| PKCA-A  | 0             | 0             | 0             |  |              | #DIV/0! |
| PKCB    | 0.04761904762 | 0.04761904762 | 0             |  | inf          | #DIV/0! |
| PKCD    | 0.04761904762 | 0.04761904762 | 0             |  | inf          | #DIV/0! |
| PKCE    | 0             | 0             | 0.05555555556 |  | 0            | #DIV/0! |
| PKCG    | 0.09523809524 | 0.09523809524 | 0.05555555556 |  | 1.473684211  | #DIV/0! |
| PKCI    | 0.1904761905  | 0.1904761905  | 0.05555555556 |  | 3.294117647  | #DIV/0! |
| PKCQ    | 0.09523809524 | 0.09523809524 | 0.1111111111  |  | 0.6842105263 | #DIV/0! |
| PKCQ-A  | 0.09523809524 | 0.09523809524 | 0.1111111111  |  | 0.6842105263 | #DIV/0! |
| PKCSH   | 0.1428571429  | 0.1428571429  | 0.1111111111  |  | 1.083333333  | #DIV/0! |
| PKCZ    | 0             | 0             | 0.1111111111  |  | 0            | #DIV/0! |
| PKCZ-A  | 0             | 0             | 0.1111111111  |  | 0            | #DIV/0! |
| PKD2    | 0.09523809524 | 0.09523809524 | 0.1111111111  |  | 0.6842105263 | #DIV/0! |
| PKD3    | 0             | 0             | 0.05555555556 |  | 0            | #DIV/0! |
| PKDC    | 0.09523809524 | 0.09523809524 | 0.1666666667  |  | 0.4210526316 | #DIV/0! |
| PKG1    | 0.04761904762 | 0.04761904762 | 0.05555555556 |  | 0.7          | #DIV/0! |
| PKG1-A  | 0.04761904762 | 0.04761904762 | 0.05555555556 |  | 0.7          | #DIV/0! |
| PKG2    | 0             | 0             | 0.05555555556 |  | 0            | #DIV/0! |
| PKRA    | 0             | 0             | 0.1111111111  |  | 0            | #DIV/0! |
| PKRA-A  | 0             | 0             | 0.1111111111  |  | 0            | #DIV/0! |
| PKRIP   | 0.04761904762 | 0.04761904762 | 0.05555555556 |  | 0.7          | #DIV/0! |
| PKXPI   | 0.04761904762 | 0.04761904762 | 0.05555555556 |  | 0.7          | #DIV/0! |
| PRLH    | 0             | 0             | 0.05555555556 |  | 0            | #DIV/0! |
| PRLHR   | 0.2380952381  | 0.2380952381  | 0             |  | inf          | #DIV/0! |
| PRLR    | 0.04761904762 | 0.04761904762 | 0.05555555556 |  | 0.7          | #DIV/0! |
| PRM1    | 0.04761904762 | 0.04761904762 | 0             |  | inf          | #DIV/0! |
| PRM2    | 0.04761904762 | 0.04761904762 | 0             |  | inf          | #DIV/0! |
| PRM3    | 0.04761904762 | 0.04761904762 | 0             |  | inf          | #DIV/0! |
| PRMT1   | 0.09523809524 | 0.09523809524 | 0.1111111111  |  | 0.6842105263 | #DIV/0! |
| PRMT2   | 0.04761904762 | 0.04761904762 | 0.1111111111  |  | 0.325        | #DIV/0! |
| PRMT5   | 0             | 0             | 0.05555555556 |  | 0            | #DIV/0! |
| PRMT5-A | 0             | 0             | 0.05555555556 |  | 0            | #DIV/0! |
| PRMT6   | 0.04761904762 | 0.04761904762 | 0.05555555556 |  | 0.7          | #DIV/0! |
| PRMT7   | 0.1428571429  | 0.1428571429  | 0.05555555556 |  | 2.333333333  | #DIV/0! |
| PRMT8   | 0.04761904762 | 0.04761904762 | 0.1111111111  |  | 0.325        | #DIV/0! |
| PRMT9   | 0             | 0             | 0.05555555556 |  | 0            | #DIV/0! |
| PRNCR1  | 0.09523809524 | 0.09523809524 | 0.1111111111  |  | 0.6842105263 | #DIV/0! |
| PRND    | 0.1904761905  | 0.1904761905  | 0.05555555556 |  | 3.294117647  | #DIV/0! |
| PRNP    | 0.1904761905  | 0.1904761905  | 0.05555555556 |  | 3.294117647  | #DIV/0! |
| PRNT    | 0.1904761905  | 0.1904761905  | 0.05555555556 |  | 3.294117647  | #DIV/0! |
| PRO180  | 0             | 0             | 0             |  |              | #DIV/0! |
| PROB1   | 0.04761904762 | 0.04761904762 | 0             |  | inf          | #DIV/0! |
| PROC    | 0             | 0             | 0.05555555556 |  | 0            | #DIV/0! |
| PROCA1  | 0.04761904762 | 0.04761904762 | 0.05555555556 |  | 0.7          | #DIV/0! |
| PROCR   | 0.09523809524 | 0.09523809524 | 0.1111111111  |  | 0.6842105263 | #DIV/0! |
| PRODH   | 0.04761904762 | 0.04761904762 | 0.05555555556 |  | 0.7          | #DIV/0! |
| PRODH2  | 0.04761904762 | 0.04761904762 | 0.05555555556 |  | 0.7          | #DIV/0! |
| PROK1   | 0.04761904762 | 0.04761904762 | 0             |  | inf          | #DIV/0! |
| PROK2   | 0.04761904762 | 0.04761904762 | 0             |  | inf          | #DIV/0! |
| PROKR   | 0             | 0             | 0.05555555556 |  | 0            | #DIV/0! |

|         |               |               |               |  |              |         |
|---------|---------------|---------------|---------------|--|--------------|---------|
| PROKR2  | 0.1904761905  | 0.1904761905  | 0.05555555556 |  | 3.294117647  | #DIV/0! |
| PROM1   | 0             | 0             | 0             |  |              | #DIV/0! |
| PROM2   | 0             | 0             | 0.1111111111  |  | 0            | #DIV/0! |
| PROPI1  | 0.09523809524 | 0.09523809524 | 0.05555555556 |  | 1.473684211  | #DIV/0! |
| RORSDI  | 0.04761904762 | 0.04761904762 | 0.05555555556 |  | 0.7          | #DIV/0! |
| PROSI1  | 0.04761904762 | 0.04761904762 | 0.05555555556 |  | 0.7          | #DIV/0! |
| ROSER0  | 0.09523809524 | 0.09523809524 | 0.1111111111  |  | 0.6842105263 | #DIV/0! |
| OSER2-A | 0.09523809524 | 0.09523809524 | 0.1111111111  |  | 0.6842105263 | #DIV/0! |
| ROSER0  | 0.04761904762 | 0.04761904762 | 0.05555555556 |  | 0.7          | #DIV/0! |
| PROX1   | 0.1428571429  | 0.1428571429  | 0             |  | inf          | #DIV/0! |
| ROX1-AS | 0.1428571429  | 0.1428571429  | 0             |  | inf          | #DIV/0! |
| PRPF18  | 0.09523809524 | 0.09523809524 | 0.1111111111  |  | 0.6842105263 | #DIV/0! |
| PRPF3   | 0.1904761905  | 0.1904761905  | 0.05555555556 |  | 3.294117647  | #DIV/0! |
| PRPF31  | 0.09523809524 | 0.09523809524 | 0.05555555556 |  | 1.473684211  | #DIV/0! |
| PRPF38A | 0.04761904762 | 0.04761904762 | 0.05555555556 |  | 0.7          | #DIV/0! |
| PRPF38I | 0.04761904762 | 0.04761904762 | 0.05555555556 |  | 0.7          | #DIV/0! |
| PRPF39  | 0.04761904762 | 0.04761904762 | 0             |  | inf          | #DIV/0! |
| PRPF4   | 0.04761904762 | 0.04761904762 | 0.05555555556 |  | 0.7          | #DIV/0! |
| PRPF40A | 0             | 0             | 0.05555555556 |  | 0            | #DIV/0! |
| PRPF40I | 0.04761904762 | 0.04761904762 | 0.05555555556 |  | 0.7          | #DIV/0! |
| PRPF6   | 0.1428571429  | 0.1428571429  | 0.2222222222  |  | 0.4583333333 | #DIV/0! |
| PRPF8   | 0             | 0             | 0.1111111111  |  | 0            | #DIV/0! |
| PRPH    | 0.04761904762 | 0.04761904762 | 0.05555555556 |  | 0.7          | #DIV/0! |
| PRPH2   | 0.04761904762 | 0.04761904762 | 0.05555555556 |  | 0.7          | #DIV/0! |
| PRPS1L  | 0.04761904762 | 0.04761904762 | 0.2222222222  |  | 0.1375       | #DIV/0! |
| PRPSAP  | 0.04761904762 | 0.04761904762 | 0             |  | inf          | #DIV/0! |
| PRPSAP0 | 0.04761904762 | 0.04761904762 | 0.1111111111  |  | 0.325        | #DIV/0! |
| PRR11   | 0.1428571429  | 0.1428571429  | 0             |  | inf          | #DIV/0! |
| PRR12   | 0.09523809524 | 0.09523809524 | 0.1111111111  |  | 0.6842105263 | #DIV/0! |
| PRR13   | 0.04761904762 | 0.04761904762 | 0.05555555556 |  | 0.7          | #DIV/0! |
| PRR14   | 0.04761904762 | 0.04761904762 | 0             |  | inf          | #DIV/0! |
| PRR14L  | 0.04761904762 | 0.04761904762 | 0.1111111111  |  | 0.325        | #DIV/0! |
| PRR15   | 0.04761904762 | 0.04761904762 | 0.1666666667  |  | 0.2          | #DIV/0! |
| PRR15L  | 0.1428571429  | 0.1428571429  | 0             |  | inf          | #DIV/0! |
| PRR16   | 0.04761904762 | 0.04761904762 | 0             |  | inf          | #DIV/0! |
| PRR19   | 0.04761904762 | 0.04761904762 | 0.05555555556 |  | 0.7          | #DIV/0! |
| PRR20G  | 0.09523809524 | 0.09523809524 | 0.05555555556 |  | 1.473684211  | #DIV/0! |
| PRR22   | 0.1428571429  | 0.1428571429  | 0.05555555556 |  | 2.333333333  | #DIV/0! |
| PRR23A  | 0.1428571429  | 0.1428571429  | 0.05555555556 |  | 2.333333333  | #DIV/0! |
| PRR23B  | 0.1428571429  | 0.1428571429  | 0.05555555556 |  | 2.333333333  | #DIV/0! |
| PRR23C  | 0.1428571429  | 0.1428571429  | 0.05555555556 |  | 2.333333333  | #DIV/0! |
| PRR23D  | 0.09523809524 | 0.09523809524 | 0.2222222222  |  | 0.2894736842 | #DIV/0! |
| PRR23D0 | 0.09523809524 | 0.09523809524 | 0.2222222222  |  | 0.2894736842 | #DIV/0! |
| PRR25   | 0.04761904762 | 0.04761904762 | 0.2222222222  |  | 0.1375       | #DIV/0! |
| PRR26   | 0.04761904762 | 0.04761904762 | 0.1111111111  |  | 0.325        | #DIV/0! |
| PRR27   | 0.04761904762 | 0.04761904762 | 0.05555555556 |  | 0.7          | #DIV/0! |
| PRR29   | 0.04761904762 | 0.04761904762 | 0             |  | inf          | #DIV/0! |
| RR29-AS | 0.04761904762 | 0.04761904762 | 0             |  | inf          | #DIV/0! |
| RR34-AS | 0             | 0             | 0.1111111111  |  | 0            | #DIV/0! |
| PRR35   | 0.04761904762 | 0.04761904762 | 0.2222222222  |  | 0.1375       | #DIV/0! |
| PRR36   | 0.1428571429  | 0.1428571429  | 0.05555555556 |  | 2.333333333  | #DIV/0! |

|          |               |               |              |  |              |         |
|----------|---------------|---------------|--------------|--|--------------|---------|
| PRR4     | 0.04761904762 | 0.04761904762 | 0.1111111111 |  | 0.325        | #DIV/0! |
| PRR5     | 0             | 0             | 0.1666666667 |  | 0            | #DIV/0! |
| 5-ARHG   | 0             | 0             | 0.1666666667 |  | 0            | #DIV/0! |
| PRR7     | 0.09523809524 | 0.09523809524 | 0.0555555556 |  | 1.473684211  | #DIV/0! |
| RR7-AS   | 0.09523809524 | 0.09523809524 | 0.0555555556 |  | 1.473684211  | #DIV/0! |
| PRR9     | 0.1904761905  | 0.1904761905  | 0            |  | inf          | #DIV/0! |
| PRRC1    | 0.04761904762 | 0.04761904762 | 0            |  | inf          | #DIV/0! |
| PRRC2A   | 0.04761904762 | 0.04761904762 | 0            |  | inf          | #DIV/0! |
| PRRC2B   | 0.09523809524 | 0.09523809524 | 0.0555555556 |  | 1.473684211  | #DIV/0! |
| PRRC2C   | 0.1428571429  | 0.1428571429  | 0.0555555556 |  | 2.333333333  | #DIV/0! |
| PRRG2    | 0.09523809524 | 0.09523809524 | 0.1111111111 |  | 0.6842105263 | #DIV/0! |
| PRRG4    | 0.04761904762 | 0.04761904762 | 0            |  | inf          | #DIV/0! |
| PRRT1    | 0.04761904762 | 0.04761904762 | 0            |  | inf          | #DIV/0! |
| PRRT1B   | 0.09523809524 | 0.09523809524 | 0.0555555556 |  | 1.473684211  | #DIV/0! |
| PRRT2    | 0.04761904762 | 0.04761904762 | 0            |  | inf          | #DIV/0! |
| PRRT3    | 0.09523809524 | 0.09523809524 | 0            |  | inf          | #DIV/0! |
| PRRT3-AS | 0.09523809524 | 0.09523809524 | 0            |  | inf          | #DIV/0! |
| PRRT4    | 0.04761904762 | 0.04761904762 | 0.0555555556 |  | 0.7          | #DIV/0! |
| PRRX1    | 0.1428571429  | 0.1428571429  | 0.0555555556 |  | 2.333333333  | #DIV/0! |
| PRRX2    | 0.09523809524 | 0.09523809524 | 0.0555555556 |  | 1.473684211  | #DIV/0! |
| PRRX2-AS | 0.09523809524 | 0.09523809524 | 0.0555555556 |  | 1.473684211  | #DIV/0! |
| PRSS1    | 0.04761904762 | 0.04761904762 | 0.0555555556 |  | 0.7          | #DIV/0! |
| PRSS12   | 0             | 0             | 0.0555555556 |  | 0            | #DIV/0! |
| PRSS21   | 0.04761904762 | 0.04761904762 | 0.1111111111 |  | 0.325        | #DIV/0! |
| PRSS22   | 0.04761904762 | 0.04761904762 | 0.1111111111 |  | 0.325        | #DIV/0! |
| PRSS27   | 0.04761904762 | 0.04761904762 | 0.1111111111 |  | 0.325        | #DIV/0! |
| PRSS3    | 0.09523809524 | 0.09523809524 | 0.0555555556 |  | 1.473684211  | #DIV/0! |
| PRSS30B  | 0.04761904762 | 0.04761904762 | 0.1111111111 |  | 0.325        | #DIV/0! |
| PRSS33   | 0.04761904762 | 0.04761904762 | 0.1111111111 |  | 0.325        | #DIV/0! |
| PRSS36   | 0.04761904762 | 0.04761904762 | 0            |  | inf          | #DIV/0! |
| PRSS37   | 0.04761904762 | 0.04761904762 | 0.0555555556 |  | 0.7          | #DIV/0! |
| PRSS38   | 0.1428571429  | 0.1428571429  | 0            |  | inf          | #DIV/0! |
| PRSS3P2  | 0.04761904762 | 0.04761904762 | 0.0555555556 |  | 0.7          | #DIV/0! |
| PRSS40A  | 0             | 0             | 0.0555555556 |  | 0            | #DIV/0! |
| PRSS40B  | 0             | 0             | 0.0555555556 |  | 0            | #DIV/0! |
| PRSS41   | 0.04761904762 | 0.04761904762 | 0.1111111111 |  | 0.325        | #DIV/0! |
| PRSS47   | 0.04761904762 | 0.04761904762 | 0.0555555556 |  | 0.7          | #DIV/0! |
| PRSS48   | 0             | 0             | 0.0555555556 |  | 0            | #DIV/0! |
| PRSS53   | 0.04761904762 | 0.04761904762 | 0            |  | inf          | #DIV/0! |
| PRSS54   | 0.04761904762 | 0.04761904762 | 0            |  | inf          | #DIV/0! |
| PRSS55   | 0.09523809524 | 0.09523809524 | 0.1111111111 |  | 0.6842105263 | #DIV/0! |
| PRSS56   | 0             | 0             | 0.0555555556 |  | 0            | #DIV/0! |
| PRSS57   | 0.09523809524 | 0.09523809524 | 0.1111111111 |  | 0.6842105263 | #DIV/0! |
| PRSS58   | 0.04761904762 | 0.04761904762 | 0.0555555556 |  | 0.7          | #DIV/0! |
| PRSS8    | 0.04761904762 | 0.04761904762 | 0            |  | inf          | #DIV/0! |
| RTFDC    | 0.09523809524 | 0.09523809524 | 0.1111111111 |  | 0.6842105263 | #DIV/0! |
| PRTG     | 0.04761904762 | 0.04761904762 | 0.0555555556 |  | 0.7          | #DIV/0! |
| PRTN3    | 0.09523809524 | 0.09523809524 | 0.1111111111 |  | 0.6842105263 | #DIV/0! |
| PRUNE1   | 0.1904761905  | 0.1904761905  | 0.0555555556 |  | 3.294117647  | #DIV/0! |
| PRUNE2   | 0             | 0             | 0.0555555556 |  | 0            | #DIV/0! |
| PRX      | 0.04761904762 | 0.04761904762 | 0.0555555556 |  | 0.7          | #DIV/0! |

|         |               |               |               |  |              |         |
|---------|---------------|---------------|---------------|--|--------------|---------|
| PRXL2A  | 0.1428571429  | 0.1428571429  | 0             |  | inf          | #DIV/0! |
| PRXL2B  | 0             | 0             | 0.1111111111  |  | 0            | #DIV/0! |
| PRXL2C  | 0.04761904762 | 0.04761904762 | 0.05555555556 |  | 0.7          | #DIV/0! |
| PSAP    | 0.1428571429  | 0.1428571429  | 0             |  | inf          | #DIV/0! |
| PSAT1   | 0             | 0             | 0.05555555556 |  | 0            | #DIV/0! |
| PSCA    | 0.04761904762 | 0.04761904762 | 0.1666666667  |  | 0.2          | #DIV/0! |
| PSD     | 0.1428571429  | 0.1428571429  | 0.05555555556 |  | 2.333333333  | #DIV/0! |
| PSD2    | 0.04761904762 | 0.04761904762 | 0             |  | inf          | #DIV/0! |
| SD2-AS  | 0.04761904762 | 0.04761904762 | 0             |  | inf          | #DIV/0! |
| PSD3    | 0.09523809524 | 0.09523809524 | 0.1111111111  |  | 0.6842105263 | #DIV/0! |
| PSD4    | 0             | 0             | 0.05555555556 |  | 0            | #DIV/0! |
| PSEN1   | 0.09523809524 | 0.09523809524 | 0             |  | inf          | #DIV/0! |
| PSEN2   | 0.1428571429  | 0.1428571429  | 0             |  | inf          | #DIV/0! |
| PSENE   | 0.04761904762 | 0.04761904762 | 0.05555555556 |  | 0.7          | #DIV/0! |
| PSG1    | 0.04761904762 | 0.04761904762 | 0.05555555556 |  | 0.7          | #DIV/0! |
| PSG10P  | 0.04761904762 | 0.04761904762 | 0.05555555556 |  | 0.7          | #DIV/0! |
| PSG11   | 0.04761904762 | 0.04761904762 | 0.05555555556 |  | 0.7          | #DIV/0! |
| PSG2    | 0.04761904762 | 0.04761904762 | 0.05555555556 |  | 0.7          | #DIV/0! |
| PSG3    | 0.04761904762 | 0.04761904762 | 0.05555555556 |  | 0.7          | #DIV/0! |
| PSG4    | 0.04761904762 | 0.04761904762 | 0.05555555556 |  | 0.7          | #DIV/0! |
| PSG5    | 0.04761904762 | 0.04761904762 | 0.05555555556 |  | 0.7          | #DIV/0! |
| PSG6    | 0.04761904762 | 0.04761904762 | 0.05555555556 |  | 0.7          | #DIV/0! |
| PSG7    | 0.04761904762 | 0.04761904762 | 0.05555555556 |  | 0.7          | #DIV/0! |
| PSG8    | 0.04761904762 | 0.04761904762 | 0.05555555556 |  | 0.7          | #DIV/0! |
| SG8-AS  | 0.04761904762 | 0.04761904762 | 0.05555555556 |  | 0.7          | #DIV/0! |
| PSG9    | 0.04761904762 | 0.04761904762 | 0.05555555556 |  | 0.7          | #DIV/0! |
| PSIP1   | 0.04761904762 | 0.04761904762 | 0.05555555556 |  | 0.7          | #DIV/0! |
| PSKH1   | 0.1428571429  | 0.1428571429  | 0.05555555556 |  | 2.333333333  | #DIV/0! |
| PSKH2   | 0.1904761905  | 0.1904761905  | 0.1111111111  |  | 1.529411765  | #DIV/0! |
| PSMA2   | 0.04761904762 | 0.04761904762 | 0.2222222222  |  | 0.1375       | #DIV/0! |
| PSMA3   | 0.04761904762 | 0.04761904762 | 0             |  | inf          | #DIV/0! |
| MA3-AS  | 0.04761904762 | 0.04761904762 | 0             |  | inf          | #DIV/0! |
| PSMA4   | 0.04761904762 | 0.04761904762 | 0.05555555556 |  | 0.7          | #DIV/0! |
| PSMA5   | 0.04761904762 | 0.04761904762 | 0.05555555556 |  | 0.7          | #DIV/0! |
| PSMA6   | 0.09523809524 | 0.09523809524 | 0             |  | inf          | #DIV/0! |
| PSMA7   | 0.1428571429  | 0.1428571429  | 0.2222222222  |  | 0.4583333333 | #DIV/0! |
| PSMA8   | 0.09523809524 | 0.09523809524 | 0.05555555556 |  | 1.473684211  | #DIV/0! |
| PSMB10  | 0.1428571429  | 0.1428571429  | 0.05555555556 |  | 2.333333333  | #DIV/0! |
| PSMB11  | 0             | 0             | 0.05555555556 |  | 0            | #DIV/0! |
| PSMB2   | 0.04761904762 | 0.04761904762 | 0.05555555556 |  | 0.7          | #DIV/0! |
| PSMB3   | 0.04761904762 | 0.04761904762 | 0             |  | inf          | #DIV/0! |
| PSMB4   | 0.1904761905  | 0.1904761905  | 0.05555555556 |  | 3.294117647  | #DIV/0! |
| PSMB5   | 0             | 0             | 0.05555555556 |  | 0            | #DIV/0! |
| PSMB7   | 0.09523809524 | 0.09523809524 | 0.05555555556 |  | 1.473684211  | #DIV/0! |
| PSMB8   | 0.04761904762 | 0.04761904762 | 0             |  | inf          | #DIV/0! |
| MB8-AS  | 0.04761904762 | 0.04761904762 | 0             |  | inf          | #DIV/0! |
| PSMB9   | 0.04761904762 | 0.04761904762 | 0             |  | inf          | #DIV/0! |
| PSMC2   | 0.04761904762 | 0.04761904762 | 0.05555555556 |  | 0.7          | #DIV/0! |
| PSMC3   | 0             | 0             | 0.05555555556 |  | 0            | #DIV/0! |
| PSMC3II | 0.04761904762 | 0.04761904762 | 0             |  | inf          | #DIV/0! |
| PSMC4   | 0.04761904762 | 0.04761904762 | 0.05555555556 |  | 0.7          | #DIV/0! |



|          |               |               |               |  |              |         |
|----------|---------------|---------------|---------------|--|--------------|---------|
| PSMC5    | 0.04761904762 | 0.04761904762 | 0             |  | inf          | #DIV/0! |
| PSMC6    | 0.04761904762 | 0.04761904762 | 0             |  | inf          | #DIV/0! |
| PSMD1    | 0             | 0             | 0.05555555556 |  | 0            | #DIV/0! |
| PSMD11   | 0             | 0             | 0             |  |              | #DIV/0! |
| PSMD12   | 0             | 0             | 0             |  |              | #DIV/0! |
| PSMD13   | 0.04761904762 | 0.04761904762 | 0             |  | inf          | #DIV/0! |
| PSMD14   | 0             | 0             | 0.05555555556 |  | 0            | #DIV/0! |
| PSMD2    | 0.1428571429  | 0.1428571429  | 0.05555555556 |  | 2.333333333  | #DIV/0! |
| PSMD3    | 0.09523809524 | 0.09523809524 | 0             |  | inf          | #DIV/0! |
| PSMD4    | 0.1904761905  | 0.1904761905  | 0.05555555556 |  | 3.294117647  | #DIV/0! |
| PSMD5    | 0.09523809524 | 0.09523809524 | 0.05555555556 |  | 1.473684211  | #DIV/0! |
| PSMD6    | 0.04761904762 | 0.04761904762 | 0             |  | inf          | #DIV/0! |
| PSMD6-A  | 0.04761904762 | 0.04761904762 | 0             |  | inf          | #DIV/0! |
| PSMD7    | 0.04761904762 | 0.04761904762 | 0             |  | inf          | #DIV/0! |
| PSMD8    | 0.04761904762 | 0.04761904762 | 0.05555555556 |  | 0.7          | #DIV/0! |
| PSMD9    | 0.04761904762 | 0.04761904762 | 0.1111111111  |  | 0.325        | #DIV/0! |
| PSME3    | 0.04761904762 | 0.04761904762 | 0             |  | inf          | #DIV/0! |
| PSME4    | 0.04761904762 | 0.04761904762 | 0.05555555556 |  | 0.7          | #DIV/0! |
| PSMF1    | 0.1904761905  | 0.1904761905  | 0.1111111111  |  | 1.529411765  | #DIV/0! |
| PSMG1    | 0.04761904762 | 0.04761904762 | 0.1111111111  |  | 0.325        | #DIV/0! |
| PSMG2    | 0.09523809524 | 0.09523809524 | 0.05555555556 |  | 1.473684211  | #DIV/0! |
| PSMG3    | 0.04761904762 | 0.04761904762 | 0.1666666667  |  | 0.2          | #DIV/0! |
| PSMG3-A  | 0.04761904762 | 0.04761904762 | 0.1666666667  |  | 0.2          | #DIV/0! |
| PSPC1    | 0.04761904762 | 0.04761904762 | 0             |  | inf          | #DIV/0! |
| PSPH     | 0.2380952381  | 0.2380952381  | 0.2222222222  |  | 0.859375     | #DIV/0! |
| PSPN     | 0.1428571429  | 0.1428571429  | 0.05555555556 |  | 2.333333333  | #DIV/0! |
| PSRC1    | 0.04761904762 | 0.04761904762 | 0.05555555556 |  | 0.7          | #DIV/0! |
| PSTK     | 0.2380952381  | 0.2380952381  | 0.05555555556 |  | 4.375        | #DIV/0! |
| PSTPIP1  | 0.04761904762 | 0.04761904762 | 0.05555555556 |  | 0.7          | #DIV/0! |
| PSTPIP2  | 0.04761904762 | 0.04761904762 | 0.05555555556 |  | 0.7          | #DIV/0! |
| PTAFR    | 0.04761904762 | 0.04761904762 | 0.1111111111  |  | 0.325        | #DIV/0! |
| PTAR1    | 0             | 0             | 0.05555555556 |  | 0            | #DIV/0! |
| PTBP1    | 0.09523809524 | 0.09523809524 | 0.1111111111  |  | 0.6842105263 | #DIV/0! |
| PTBP2    | 0.04761904762 | 0.04761904762 | 0.05555555556 |  | 0.7          | #DIV/0! |
| PTBP3    | 0.04761904762 | 0.04761904762 | 0.05555555556 |  | 0.7          | #DIV/0! |
| PTCD1    | 0.04761904762 | 0.04761904762 | 0.05555555556 |  | 0.7          | #DIV/0! |
| PTCD2    | 0             | 0             | 0.05555555556 |  | 0            | #DIV/0! |
| PTCD3    | 0             | 0             | 0.05555555556 |  | 0            | #DIV/0! |
| PTCH1    | 0.04761904762 | 0.04761904762 | 0.05555555556 |  | 0.7          | #DIV/0! |
| PTCH2    | 0.04761904762 | 0.04761904762 | 0.05555555556 |  | 0.7          | #DIV/0! |
| PTCHD3   | 0.09523809524 | 0.09523809524 | 0.1111111111  |  | 0.6842105263 | #DIV/0! |
| PTCHD4   | 0.04761904762 | 0.04761904762 | 0.05555555556 |  | 0.7          | #DIV/0! |
| PTCRA    | 0.04761904762 | 0.04761904762 | 0.05555555556 |  | 0.7          | #DIV/0! |
| PTCSC1   | 0.04761904762 | 0.04761904762 | 0.2222222222  |  | 0.1375       | #DIV/0! |
| PTCSC2   | 0.04761904762 | 0.04761904762 | 0             |  | inf          | #DIV/0! |
| PTDSS1   | 0.1904761905  | 0.1904761905  | 0.1666666667  |  | 0.9411764706 | #DIV/0! |
| PTDSS2   | 0.04761904762 | 0.04761904762 | 0             |  | inf          | #DIV/0! |
| PTEN     | 0.1428571429  | 0.1428571429  | 0.1666666667  |  | 0.6666666667 | #DIV/0! |
| PTENP1   | 0.09523809524 | 0.09523809524 | 0.05555555556 |  | 1.473684211  | #DIV/0! |
| PTENP1-A | 0.09523809524 | 0.09523809524 | 0.05555555556 |  | 1.473684211  | #DIV/0! |
| PTER     | 0.09523809524 | 0.09523809524 | 0.1111111111  |  | 0.6842105263 | #DIV/0! |

|         |               |               |               |  |              |         |
|---------|---------------|---------------|---------------|--|--------------|---------|
| PTF1A   | 0.09523809524 | 0.09523809524 | 0.1111111111  |  | 0.6842105263 | #DIV/0! |
| PTGDR   | 0.04761904762 | 0.04761904762 | 0             |  | inf          | #DIV/0! |
| PTGDS   | 0.1428571429  | 0.1428571429  | 0.05555555556 |  | 2.333333333  | #DIV/0! |
| PTGER1  | 0.1428571429  | 0.1428571429  | 0.1111111111  |  | 1.083333333  | #DIV/0! |
| PTGER2  | 0.04761904762 | 0.04761904762 | 0             |  | inf          | #DIV/0! |
| PTGER3  | 0.04761904762 | 0.04761904762 | 0.05555555556 |  | 0.7          | #DIV/0! |
| PTGER4  | 0.04761904762 | 0.04761904762 | 0.05555555556 |  | 0.7          | #DIV/0! |
| IP2-CDK | 0.09523809524 | 0.09523809524 | 0.2222222222  |  | 0.2894736842 | #DIV/0! |
| PTGES   | 0.09523809524 | 0.09523809524 | 0.05555555556 |  | 1.473684211  | #DIV/0! |
| PTGES2  | 0.09523809524 | 0.09523809524 | 0.05555555556 |  | 1.473684211  | #DIV/0! |
| GES2-A  | 0.09523809524 | 0.09523809524 | 0.05555555556 |  | 1.473684211  | #DIV/0! |
| PTGES3  | 0.1428571429  | 0.1428571429  | 0.05555555556 |  | 2.333333333  | #DIV/0! |
| TGES3I  | 0.04761904762 | 0.04761904762 | 0             |  | inf          | #DIV/0! |
| S3L-AA  | 0.04761904762 | 0.04761904762 | 0             |  | inf          | #DIV/0! |
| PTGFR   | 0.04761904762 | 0.04761904762 | 0.05555555556 |  | 0.7          | #DIV/0! |
| PTGFRN  | 0.04761904762 | 0.04761904762 | 0.05555555556 |  | 0.7          | #DIV/0! |
| PTGIR   | 0.09523809524 | 0.09523809524 | 0.1111111111  |  | 0.6842105263 | #DIV/0! |
| PTGIS   | 0.09523809524 | 0.09523809524 | 0.1666666667  |  | 0.4210526316 | #DIV/0! |
| PTGR1   | 0.04761904762 | 0.04761904762 | 0.05555555556 |  | 0.7          | #DIV/0! |
| PTGR2   | 0.09523809524 | 0.09523809524 | 0             |  | inf          | #DIV/0! |
| PTGS1   | 0.09523809524 | 0.09523809524 | 0.05555555556 |  | 1.473684211  | #DIV/0! |
| PTGS2   | 0.1428571429  | 0.1428571429  | 0.05555555556 |  | 2.333333333  | #DIV/0! |
| PTH2    | 0.09523809524 | 0.09523809524 | 0.1111111111  |  | 0.6842105263 | #DIV/0! |
| PTH2R   | 0             | 0             | 0.05555555556 |  | 0            | #DIV/0! |
| PTHLH   | 0.04761904762 | 0.04761904762 | 0.05555555556 |  | 0.7          | #DIV/0! |
| PTK2    | 0.04761904762 | 0.04761904762 | 0.2222222222  |  | 0.1375       | #DIV/0! |
| PTK2B   | 0.04761904762 | 0.04761904762 | 0.1111111111  |  | 0.325        | #DIV/0! |
| PTK6    | 0.1428571429  | 0.1428571429  | 0.2222222222  |  | 0.4583333333 | #DIV/0! |
| PTK7    | 0.04761904762 | 0.04761904762 | 0.05555555556 |  | 0.7          | #DIV/0! |
| PTMA    | 0             | 0             | 0.05555555556 |  | 0            | #DIV/0! |
| TMAP1   | 0.04761904762 | 0.04761904762 | 0             |  | inf          | #DIV/0! |
| PTMS    | 0.04761904762 | 0.04761904762 | 0.1111111111  |  | 0.325        | #DIV/0! |
| PTN     | 0.04761904762 | 0.04761904762 | 0.05555555556 |  | 0.7          | #DIV/0! |
| PTOV1   | 0.09523809524 | 0.09523809524 | 0.1111111111  |  | 0.6842105263 | #DIV/0! |
| TOV1-A  | 0.09523809524 | 0.09523809524 | 0.1111111111  |  | 0.6842105263 | #DIV/0! |
| TOV1-A  | 0.09523809524 | 0.09523809524 | 0.1111111111  |  | 0.6842105263 | #DIV/0! |
| PTP4A2  | 0.04761904762 | 0.04761904762 | 0.1111111111  |  | 0.325        | #DIV/0! |
| PTP4A3  | 0.04761904762 | 0.04761904762 | 0.2222222222  |  | 0.1375       | #DIV/0! |
| PTPA    | 0.09523809524 | 0.09523809524 | 0.05555555556 |  | 1.473684211  | #DIV/0! |
| PTPDC1  | 0.04761904762 | 0.04761904762 | 0.05555555556 |  | 0.7          | #DIV/0! |
| PTPMT1  | 0             | 0             | 0.05555555556 |  | 0            | #DIV/0! |
| PTPN1   | 0.09523809524 | 0.09523809524 | 0.1666666667  |  | 0.4210526316 | #DIV/0! |
| PTPN11  | 0             | 0             | 0.1111111111  |  | 0            | #DIV/0! |
| PTPN12  | 0.04761904762 | 0.04761904762 | 0.1111111111  |  | 0.325        | #DIV/0! |
| PTPN13  | 0             | 0             | 0.05555555556 |  | 0            | #DIV/0! |
| PTPN14  | 0.1428571429  | 0.1428571429  | 0             |  | inf          | #DIV/0! |
| PTPN18  | 0             | 0             | 0.05555555556 |  | 0            | #DIV/0! |
| PTPN2   | 0.09523809524 | 0.09523809524 | 0.05555555556 |  | 1.473684211  | #DIV/0! |
| PTPN20  | 0.1428571429  | 0.1428571429  | 0.05555555556 |  | 2.333333333  | #DIV/0! |
| PTPN22  | 0.04761904762 | 0.04761904762 | 0.05555555556 |  | 0.7          | #DIV/0! |
| PTPN23  | 0.09523809524 | 0.09523809524 | 0             |  | inf          | #DIV/0! |

|               |               |               |               |  |              |         |
|---------------|---------------|---------------|---------------|--|--------------|---------|
| <b>PTPN3</b>  | 0.04761904762 | 0.04761904762 | 0.05555555556 |  | 0.7          | #DIV/0! |
| <b>PTPN4</b>  | 0             | 0             | 0.05555555556 |  | 0            | #DIV/0! |
| <b>PTPN6</b>  | 0.04761904762 | 0.04761904762 | 0.11111111111 |  | 0.325        | #DIV/0! |
| <b>PTPN7</b>  | 0.1428571429  | 0.1428571429  | 0             |  | inf          | #DIV/0! |
| <b>PTPN9</b>  | 0.04761904762 | 0.04761904762 | 0.05555555556 |  | 0.7          | #DIV/0! |
| <b>PTPRA</b>  | 0.1904761905  | 0.1904761905  | 0.05555555556 |  | 3.294117647  | #DIV/0! |
| <b>PTPRB</b>  | 0.09523809524 | 0.09523809524 | 0.11111111111 |  | 0.6842105263 | #DIV/0! |
| <b>PTPRC</b>  | 0.1428571429  | 0.1428571429  | 0.11111111111 |  | 1.083333333  | #DIV/0! |
| <b>PTPRD</b>  | 0.09523809524 | 0.09523809524 | 0.05555555556 |  | 1.473684211  | #DIV/0! |
| <b>PRD-A0</b> | 0.09523809524 | 0.09523809524 | 0.05555555556 |  | 1.473684211  | #DIV/0! |
| <b>PRD-A0</b> | 0.04761904762 | 0.04761904762 | 0.05555555556 |  | 0.7          | #DIV/0! |
| <b>PTPRE</b>  | 0.2380952381  | 0.2380952381  | 0.05555555556 |  | 4.375        | #DIV/0! |
| <b>PTPRF</b>  | 0.04761904762 | 0.04761904762 | 0.05555555556 |  | 0.7          | #DIV/0! |
| <b>PTPRG</b>  | 0.04761904762 | 0.04761904762 | 0             |  | inf          | #DIV/0! |
| <b>PRG-A0</b> | 0.04761904762 | 0.04761904762 | 0             |  | inf          | #DIV/0! |
| <b>PTPRH</b>  | 0.09523809524 | 0.09523809524 | 0.05555555556 |  | 1.473684211  | #DIV/0! |
| <b>PTPRJ</b>  | 0             | 0             | 0.05555555556 |  | 0            | #DIV/0! |
| <b>PTPRM</b>  | 0.09523809524 | 0.09523809524 | 0             |  | inf          | #DIV/0! |
| <b>PTPRN2</b> | 0.1428571429  | 0.1428571429  | 0.05555555556 |  | 2.333333333  | #DIV/0! |
| <b>PTPRO</b>  | 0.04761904762 | 0.04761904762 | 0.11111111111 |  | 0.325        | #DIV/0! |
| <b>PTPRQ</b>  | 0.04761904762 | 0.04761904762 | 0.05555555556 |  | 0.7          | #DIV/0! |
| <b>PTPRR</b>  | 0.09523809524 | 0.09523809524 | 0.11111111111 |  | 0.6842105263 | #DIV/0! |
| <b>PTPRS</b>  | 0.1428571429  | 0.1428571429  | 0.05555555556 |  | 2.333333333  | #DIV/0! |
| <b>PTPRT</b>  | 0.1428571429  | 0.1428571429  | 0.11111111111 |  | 1.083333333  | #DIV/0! |
| <b>PTPRU</b>  | 0.04761904762 | 0.04761904762 | 0.11111111111 |  | 0.325        | #DIV/0! |
| <b>PTPRV</b>  | 0.1428571429  | 0.1428571429  | 0             |  | inf          | #DIV/0! |
| <b>PTPRZ1</b> | 0.04761904762 | 0.04761904762 | 0.05555555556 |  | 0.7          | #DIV/0! |
| <b>PTRH1</b>  | 0.09523809524 | 0.09523809524 | 0.05555555556 |  | 1.473684211  | #DIV/0! |
| <b>PTRH2</b>  | 0.1428571429  | 0.1428571429  | 0             |  | inf          | #DIV/0! |
| <b>PTTG1</b>  | 0.04761904762 | 0.04761904762 | 0.05555555556 |  | 0.7          | #DIV/0! |
| <b>PTTG1H</b> | 0.04761904762 | 0.04761904762 | 0.11111111111 |  | 0.325        | #DIV/0! |
| <b>PTTG3P</b> | 0.1428571429  | 0.1428571429  | 0.16666666667 |  | 0.6666666667 | #DIV/0! |
| <b>PTX3</b>   | 0.1428571429  | 0.1428571429  | 0.05555555556 |  | 2.333333333  | #DIV/0! |
| <b>PTX4</b>   | 0.09523809524 | 0.09523809524 | 0.22222222222 |  | 0.2894736842 | #DIV/0! |
| <b>PUF60</b>  | 0.04761904762 | 0.04761904762 | 0.16666666667 |  | 0.2          | #DIV/0! |
| <b>PUM1</b>   | 0.04761904762 | 0.04761904762 | 0.11111111111 |  | 0.325        | #DIV/0! |
| <b>PUM2</b>   | 0             | 0             | 0.05555555556 |  | 0            | #DIV/0! |
| <b>PUM3</b>   | 0.04761904762 | 0.04761904762 | 0.05555555556 |  | 0.7          | #DIV/0! |
| <b>PURA</b>   | 0.04761904762 | 0.04761904762 | 0             |  | inf          | #DIV/0! |
| <b>PURB</b>   | 0.04761904762 | 0.04761904762 | 0.22222222222 |  | 0.1375       | #DIV/0! |
| <b>PURG</b>   | 0.04761904762 | 0.04761904762 | 0.11111111111 |  | 0.325        | #DIV/0! |
| <b>PURPL</b>  | 0.04761904762 | 0.04761904762 | 0.05555555556 |  | 0.7          | #DIV/0! |
| <b>PUS1</b>   | 0.09523809524 | 0.09523809524 | 0.05555555556 |  | 1.473684211  | #DIV/0! |
| <b>PUS10</b>  | 0.09523809524 | 0.09523809524 | 0.05555555556 |  | 1.473684211  | #DIV/0! |
| <b>PUS7</b>   | 0.04761904762 | 0.04761904762 | 0.05555555556 |  | 0.7          | #DIV/0! |
| <b>PUS7L</b>  | 0.04761904762 | 0.04761904762 | 0.05555555556 |  | 0.7          | #DIV/0! |
| <b>PUSL1</b>  | 0             | 0             | 0.11111111111 |  | 0            | #DIV/0! |
| <b>PVALB</b>  | 0             | 0             | 0.11111111111 |  | 0            | #DIV/0! |
| <b>PVALEH</b> | 0.04761904762 | 0.04761904762 | 0             |  | inf          | #DIV/0! |
| <b>PVR</b>    | 0.09523809524 | 0.09523809524 | 0.05555555556 |  | 1.473684211  | #DIV/0! |
| <b>PVRIG</b>  | 0.04761904762 | 0.04761904762 | 0.05555555556 |  | 0.7          | #DIV/0! |

|         |               |               |               |  |              |         |
|---------|---------------|---------------|---------------|--|--------------|---------|
| VRIG21  | 0.04761904762 | 0.04761904762 | 0.05555555556 |  | 0.7          | #DIV/0! |
| PVT1    | 0.09523809524 | 0.09523809524 | 0.11111111111 |  | 0.6842105263 | #DIV/0! |
| PWP1    | 0.04761904762 | 0.04761904762 | 0.05555555556 |  | 0.7          | #DIV/0! |
| PWP2    | 0.04761904762 | 0.04761904762 | 0.11111111111 |  | 0.325        | #DIV/0! |
| WWP2A   | 0.04761904762 | 0.04761904762 | 0.05555555556 |  | 0.7          | #DIV/0! |
| WWP2I   | 0.2380952381  | 0.2380952381  | 0             |  | inf          | #DIV/0! |
| WWP3A   | 0.09523809524 | 0.09523809524 | 0.11111111111 |  | 0.6842105263 | #DIV/0! |
| PXDN    | 0             | 0             | 0.05555555556 |  | 0            | #DIV/0! |
| PXDNL   | 0.09523809524 | 0.09523809524 | 0.11111111111 |  | 0.6842105263 | #DIV/0! |
| PXK     | 0.04761904762 | 0.04761904762 | 0             |  | inf          | #DIV/0! |
| PXMP2   | 0.09523809524 | 0.09523809524 | 0.05555555556 |  | 1.473684211  | #DIV/0! |
| PXMP4   | 0.09523809524 | 0.09523809524 | 0.11111111111 |  | 0.6842105263 | #DIV/0! |
| PXN     | 0             | 0             | 0.11111111111 |  | 0            | #DIV/0! |
| PXN-AS1 | 0             | 0             | 0.11111111111 |  | 0            | #DIV/0! |
| PXT1    | 0.04761904762 | 0.04761904762 | 0.05555555556 |  | 0.7          | #DIV/0! |
| PXYLP1  | 0.1428571429  | 0.1428571429  | 0.05555555556 |  | 2.333333333  | #DIV/0! |
| PYCARI  | 0.04761904762 | 0.04761904762 | 0             |  | inf          | #DIV/0! |
| CARD-A  | 0.04761904762 | 0.04761904762 | 0             |  | inf          | #DIV/0! |
| PYCR1   | 0.04761904762 | 0.04761904762 | 0             |  | inf          | #DIV/0! |
| PYCR2   | 0.1428571429  | 0.1428571429  | 0.05555555556 |  | 2.333333333  | #DIV/0! |
| PYCR3   | 0.04761904762 | 0.04761904762 | 0.16666666667 |  | 0.2          | #DIV/0! |
| PYDC1   | 0.04761904762 | 0.04761904762 | 0             |  | inf          | #DIV/0! |
| PYDC2   | 0.09523809524 | 0.09523809524 | 0.05555555556 |  | 1.473684211  | #DIV/0! |
| PYDC5   | 0.1428571429  | 0.1428571429  | 0             |  | inf          | #DIV/0! |
| PYGB    | 0.1904761905  | 0.1904761905  | 0.05555555556 |  | 3.294117647  | #DIV/0! |
| PYGO1   | 0.04761904762 | 0.04761904762 | 0.05555555556 |  | 0.7          | #DIV/0! |
| PYGO2   | 0.1904761905  | 0.1904761905  | 0.11111111111 |  | 1.529411765  | #DIV/0! |
| PYHIN1  | 0.1428571429  | 0.1428571429  | 0             |  | inf          | #DIV/0! |
| PYM1    | 0.04761904762 | 0.04761904762 | 0.05555555556 |  | 0.7          | #DIV/0! |
| YROXD   | 0.04761904762 | 0.04761904762 | 0.05555555556 |  | 0.7          | #DIV/0! |
| YROXD   | 0.1428571429  | 0.1428571429  | 0             |  | inf          | #DIV/0! |
| PYURF   | 0             | 0             | 0.05555555556 |  | 0            | #DIV/0! |
| PYY     | 0.09523809524 | 0.09523809524 | 0             |  | inf          | #DIV/0! |
| PYY2    | 0.04761904762 | 0.04761904762 | 0.05555555556 |  | 0.7          | #DIV/0! |
| PZP     | 0.04761904762 | 0.04761904762 | 0.11111111111 |  | 0.325        | #DIV/0! |
| QARS    | 0.09523809524 | 0.09523809524 | 0             |  | inf          | #DIV/0! |
| QDPR    | 0             | 0             | 0             |  |              | #DIV/0! |
| QKI     | 0             | 0             | 0.11111111111 |  | 0            | #DIV/0! |
| QPCT    | 0             | 0             | 0.05555555556 |  | 0            | #DIV/0! |
| QPCTL   | 0.09523809524 | 0.09523809524 | 0.11111111111 |  | 0.6842105263 | #DIV/0! |
| QPRT    | 0.04761904762 | 0.04761904762 | 0             |  | inf          | #DIV/0! |
| QRF     | 0.09523809524 | 0.09523809524 | 0.05555555556 |  | 1.473684211  | #DIV/0! |
| QRFPR   | 0             | 0             | 0.05555555556 |  | 0            | #DIV/0! |
| QRICH1  | 0.09523809524 | 0.09523809524 | 0             |  | inf          | #DIV/0! |
| QRICH2  | 0.04761904762 | 0.04761904762 | 0             |  | inf          | #DIV/0! |
| QRSL1   | 0             | 0             | 0             |  |              | #DIV/0! |
| QSER1   | 0.04761904762 | 0.04761904762 | 0             |  | inf          | #DIV/0! |
| QSOX1   | 0.1428571429  | 0.1428571429  | 0             |  | inf          | #DIV/0! |
| QSOX2   | 0.1428571429  | 0.1428571429  | 0.05555555556 |  | 2.333333333  | #DIV/0! |
| QTRT1   | 0.1428571429  | 0.1428571429  | 0.11111111111 |  | 1.083333333  | #DIV/0! |
| QTRT2   | 0.09523809524 | 0.09523809524 | 0.05555555556 |  | 1.473684211  | #DIV/0! |

|         |               |               |              |  |              |         |
|---------|---------------|---------------|--------------|--|--------------|---------|
| R3HCC1  | 0.04761904762 | 0.04761904762 | 0.1111111111 |  | 0.325        | #DIV/0! |
| 3HCC1   | 0.1428571429  | 0.1428571429  | 0            |  | inf          | #DIV/0! |
| R3HDM1  | 0.04761904762 | 0.04761904762 | 0.0555555556 |  | 0.7          | #DIV/0! |
| R3HDM2  | 0.1428571429  | 0.1428571429  | 0.0555555556 |  | 2.333333333  | #DIV/0! |
| R3HDM4  | 0.09523809524 | 0.09523809524 | 0.1111111111 |  | 0.6842105263 | #DIV/0! |
| R3HDM1  | 0.1428571429  | 0.1428571429  | 0.1666666667 |  | 0.6666666667 | #DIV/0! |
| RAB11A  | 0.04761904762 | 0.04761904762 | 0.0555555556 |  | 0.7          | #DIV/0! |
| RAB11B  | 0.1428571429  | 0.1428571429  | 0.0555555556 |  | 2.333333333  | #DIV/0! |
| B11B-A  | 0.1428571429  | 0.1428571429  | 0.0555555556 |  | 2.333333333  | #DIV/0! |
| AB11FI  | 0.09523809524 | 0.09523809524 | 0.1111111111 |  | 0.6842105263 | #DIV/0! |
| AB11FII | 0.2380952381  | 0.2380952381  | 0            |  | inf          | #DIV/0! |
| AB11FII | 0.04761904762 | 0.04761904762 | 0.2222222222 |  | 0.1375       | #DIV/0! |
| AB11FII | 0             | 0             | 0            |  |              | #DIV/0! |
| AB11FII | 0             | 0             | 0.0555555556 |  | 0            | #DIV/0! |
| RAB12   | 0.09523809524 | 0.09523809524 | 0            |  | inf          | #DIV/0! |
| RAB13   | 0.1904761905  | 0.1904761905  | 0.0555555556 |  | 3.294117647  | #DIV/0! |
| RAB14   | 0.09523809524 | 0.09523809524 | 0.0555555556 |  | 1.473684211  | #DIV/0! |
| RAB17   | 0             | 0             | 0.0555555556 |  | 0            | #DIV/0! |
| RAB18   | 0.09523809524 | 0.09523809524 | 0.1111111111 |  | 0.6842105263 | #DIV/0! |
| RAB19   | 0.04761904762 | 0.04761904762 | 0.0555555556 |  | 0.7          | #DIV/0! |
| RAB1A   | 0             | 0             | 0.0555555556 |  | 0            | #DIV/0! |
| RAB21   | 0.04761904762 | 0.04761904762 | 0.1111111111 |  | 0.325        | #DIV/0! |
| RAB22A  | 0.1428571429  | 0.1428571429  | 0.2222222222 |  | 0.4583333333 | #DIV/0! |
| RAB23   | 0.04761904762 | 0.04761904762 | 0.0555555556 |  | 0.7          | #DIV/0! |
| RAB24   | 0.09523809524 | 0.09523809524 | 0.0555555556 |  | 1.473684211  | #DIV/0! |
| RAB25   | 0.1428571429  | 0.1428571429  | 0.1111111111 |  | 1.083333333  | #DIV/0! |
| RAB26   | 0.09523809524 | 0.09523809524 | 0.2222222222 |  | 0.2894736842 | #DIV/0! |
| RAB27A  | 0.04761904762 | 0.04761904762 | 0.0555555556 |  | 0.7          | #DIV/0! |
| RAB27B  | 0.09523809524 | 0.09523809524 | 0.0555555556 |  | 1.473684211  | #DIV/0! |
| RAB28   | 0             | 0             | 0            |  |              | #DIV/0! |
| RAB29   | 0.1428571429  | 0.1428571429  | 0            |  | inf          | #DIV/0! |
| RAB2A   | 0.1428571429  | 0.1428571429  | 0.1666666667 |  | 0.6666666667 | #DIV/0! |
| RAB31   | 0.09523809524 | 0.09523809524 | 0.0555555556 |  | 1.473684211  | #DIV/0! |
| RAB33B  | 0             | 0             | 0.0555555556 |  | 0            | #DIV/0! |
| RAB34   | 0.04761904762 | 0.04761904762 | 0.0555555556 |  | 0.7          | #DIV/0! |
| RAB35   | 0             | 0             | 0.1111111111 |  | 0            | #DIV/0! |
| RAB36   | 0             | 0             | 0.0555555556 |  | 0            | #DIV/0! |
| RAB37   | 0.04761904762 | 0.04761904762 | 0            |  | inf          | #DIV/0! |
| RAB3A   | 0.1428571429  | 0.1428571429  | 0.1111111111 |  | 1.083333333  | #DIV/0! |
| RAB3B   | 0.04761904762 | 0.04761904762 | 0.0555555556 |  | 0.7          | #DIV/0! |
| RAB3C   | 0.04761904762 | 0.04761904762 | 0            |  | inf          | #DIV/0! |
| RAB3D   | 0.1428571429  | 0.1428571429  | 0.1111111111 |  | 1.083333333  | #DIV/0! |
| AB3GAI  | 0.04761904762 | 0.04761904762 | 0.0555555556 |  | 0.7          | #DIV/0! |
| AB3GAI  | 0.1428571429  | 0.1428571429  | 0.0555555556 |  | 2.333333333  | #DIV/0! |
| RAB3IP  | 0.09523809524 | 0.09523809524 | 0.1111111111 |  | 0.6842105263 | #DIV/0! |
| RAB40B  | 0             | 0             | 0            |  |              | #DIV/0! |
| RAB40C  | 0.04761904762 | 0.04761904762 | 0.2222222222 |  | 0.1375       | #DIV/0! |
| RAB42   | 0.04761904762 | 0.04761904762 | 0.1111111111 |  | 0.325        | #DIV/0! |
| RAB43   | 0.09523809524 | 0.09523809524 | 0.0555555556 |  | 1.473684211  | #DIV/0! |
| RAB44   | 0.04761904762 | 0.04761904762 | 0.0555555556 |  | 0.7          | #DIV/0! |
| RAB4A   | 0.1428571429  | 0.1428571429  | 0            |  | inf          | #DIV/0! |

|         |               |               |               |  |              |         |
|---------|---------------|---------------|---------------|--|--------------|---------|
| RAB5A   | 0.04761904762 | 0.04761904762 | 0             |  | inf          | #DIV/0! |
| RAB5B   | 0.09523809524 | 0.09523809524 | 0.05555555556 |  | 1.473684211  | #DIV/0! |
| RAB5C   | 0.04761904762 | 0.04761904762 | 0             |  | inf          | #DIV/0! |
| RAB5IF  | 0.09523809524 | 0.09523809524 | 0.1111111111  |  | 0.6842105263 | #DIV/0! |
| RAB6B   | 0.1428571429  | 0.1428571429  | 0.05555555556 |  | 2.333333333  | #DIV/0! |
| RAB6C   | 0             | 0             | 0.05555555556 |  | 0            | #DIV/0! |
| AB6C-AS | 0             | 0             | 0.05555555556 |  | 0            | #DIV/0! |
| RAB6D   | 0             | 0             | 0.05555555556 |  | 0            | #DIV/0! |
| RAB7A   | 0.09523809524 | 0.09523809524 | 0.05555555556 |  | 1.473684211  | #DIV/0! |
| RAB8A   | 0.1428571429  | 0.1428571429  | 0.1111111111  |  | 1.083333333  | #DIV/0! |
| RAB8B   | 0.04761904762 | 0.04761904762 | 0.05555555556 |  | 0.7          | #DIV/0! |
| RAB9BP  | 0.04761904762 | 0.04761904762 | 0             |  | inf          | #DIV/0! |
| RABAC1  | 0.04761904762 | 0.04761904762 | 0.05555555556 |  | 0.7          | #DIV/0! |
| RABEP1  | 0             | 0             | 0.1111111111  |  | 0            | #DIV/0! |
| RABEP2  | 0.04761904762 | 0.04761904762 | 0             |  | inf          | #DIV/0! |
| RABEPK  | 0.09523809524 | 0.09523809524 | 0.05555555556 |  | 1.473684211  | #DIV/0! |
| ABGAP   | 0.09523809524 | 0.09523809524 | 0.05555555556 |  | 1.473684211  | #DIV/0! |
| ABGAP1  | 0.1428571429  | 0.1428571429  | 0             |  | inf          | #DIV/0! |
| ABGEF   | 0.04761904762 | 0.04761904762 | 0.1111111111  |  | 0.325        | #DIV/0! |
| ABGGT   | 0.04761904762 | 0.04761904762 | 0.05555555556 |  | 0.7          | #DIV/0! |
| RABIF   | 0.1428571429  | 0.1428571429  | 0             |  | inf          | #DIV/0! |
| RABL2A  | 0             | 0             | 0.05555555556 |  | 0            | #DIV/0! |
| RABL2B  | 0             | 0             | 0.1111111111  |  | 0            | #DIV/0! |
| RABL3   | 0.09523809524 | 0.09523809524 | 0.05555555556 |  | 1.473684211  | #DIV/0! |
| RABL6   | 0.1428571429  | 0.1428571429  | 0.05555555556 |  | 2.333333333  | #DIV/0! |
| RAC2    | 0             | 0             | 0.1111111111  |  | 0            | #DIV/0! |
| RAC3    | 0.04761904762 | 0.04761904762 | 0             |  | inf          | #DIV/0! |
| ACGAP   | 0.04761904762 | 0.04761904762 | 0.05555555556 |  | 0.7          | #DIV/0! |
| ACGAP1  | 0.04761904762 | 0.04761904762 | 0.05555555556 |  | 0.7          | #DIV/0! |
| RACK1   | 0.09523809524 | 0.09523809524 | 0.05555555556 |  | 1.473684211  | #DIV/0! |
| RAD1    | 0.04761904762 | 0.04761904762 | 0.05555555556 |  | 0.7          | #DIV/0! |
| RAD17   | 0.04761904762 | 0.04761904762 | 0.05555555556 |  | 0.7          | #DIV/0! |
| RAD18   | 0.04761904762 | 0.04761904762 | 0             |  | inf          | #DIV/0! |
| RAD21   | 0.1904761905  | 0.1904761905  | 0.1666666667  |  | 0.9411764706 | #DIV/0! |
| AD21-AS | 0.1904761905  | 0.1904761905  | 0.1666666667  |  | 0.9411764706 | #DIV/0! |
| RAD21L  | 0.1904761905  | 0.1904761905  | 0.1111111111  |  | 1.529411765  | #DIV/0! |
| RAD23A  | 0.1428571429  | 0.1428571429  | 0.1111111111  |  | 1.083333333  | #DIV/0! |
| RAD23B  | 0.04761904762 | 0.04761904762 | 0.05555555556 |  | 0.7          | #DIV/0! |
| RAD50   | 0.04761904762 | 0.04761904762 | 0             |  | inf          | #DIV/0! |
| AD51AF  | 0.04761904762 | 0.04761904762 | 0.1111111111  |  | 0.325        | #DIV/0! |
| AD51AF  | 0             | 0             | 0.05555555556 |  | 0            | #DIV/0! |
| RAD51B  | 0             | 0             | 0.1666666667  |  | 0            | #DIV/0! |
| RAD51C  | 0.1428571429  | 0.1428571429  | 0             |  | inf          | #DIV/0! |
| RAD52   | 0.04761904762 | 0.04761904762 | 0.1111111111  |  | 0.325        | #DIV/0! |
| RAD54B  | 0.1904761905  | 0.1904761905  | 0.1111111111  |  | 1.529411765  | #DIV/0! |
| RAD54L  | 0.04761904762 | 0.04761904762 | 0.05555555556 |  | 0.7          | #DIV/0! |
| RAD54L  | 0.04761904762 | 0.04761904762 | 0             |  | inf          | #DIV/0! |
| RAD9B   | 0             | 0             | 0.1111111111  |  | 0            | #DIV/0! |
| RADIL   | 0.04761904762 | 0.04761904762 | 0.1666666667  |  | 0.2          | #DIV/0! |
| RAE1    | 0.1428571429  | 0.1428571429  | 0.2222222222  |  | 0.4583333333 | #DIV/0! |
| RAF1    | 0.09523809524 | 0.09523809524 | 0             |  | inf          | #DIV/0! |

|         |               |               |               |  |               |         |
|---------|---------------|---------------|---------------|--|---------------|---------|
| RAII    | 0.04761904762 | 0.04761904762 | 0.1111111111  |  | 0.325         | #DIV/0! |
| RAII-AS | 0.04761904762 | 0.04761904762 | 0.1111111111  |  | 0.325         | #DIV/0! |
| RAII4   | 0.04761904762 | 0.04761904762 | 0.1111111111  |  | 0.325         | #DIV/0! |
| RALA    | 0.04761904762 | 0.04761904762 | 0.2222222222  |  | 0.1375        | #DIV/0! |
| RALB    | 0             | 0             | 0.05555555556 |  | 0             | #DIV/0! |
| RALBP1  | 0.09523809524 | 0.09523809524 | 0             |  | inf           | #DIV/0! |
| ALGAP   | 0.09523809524 | 0.09523809524 | 0             |  | inf           | #DIV/0! |
| LGAPA   | 0.04761904762 | 0.04761904762 | 0.05555555556 |  | 0.7           | #DIV/0! |
| ALGAP   | 0.1904761905  | 0.1904761905  | 0.05555555556 |  | 3.294117647   | #DIV/0! |
| ALGAP   | 0.1428571429  | 0.1428571429  | 0.16666666667 |  | 0.66666666667 | #DIV/0! |
| RALGDS  | 0.04761904762 | 0.04761904762 | 0             |  | inf           | #DIV/0! |
| ALGPS   | 0.09523809524 | 0.09523809524 | 0.05555555556 |  | 1.473684211   | #DIV/0! |
| ALGPS   | 0.1428571429  | 0.1428571429  | 0             |  | inf           | #DIV/0! |
| RALY    | 0.09523809524 | 0.09523809524 | 0.1111111111  |  | 0.6842105263  | #DIV/0! |
| ALY-AS  | 0.09523809524 | 0.09523809524 | 0.1111111111  |  | 0.6842105263  | #DIV/0! |
| RALYL   | 0.1428571429  | 0.1428571429  | 0.1111111111  |  | 1.0833333333  | #DIV/0! |
| RAMAC   | 0.04761904762 | 0.04761904762 | 0.05555555556 |  | 0.7           | #DIV/0! |
| RAMP1   | 0             | 0             | 0.05555555556 |  | 0             | #DIV/0! |
| RAMP2   | 0.04761904762 | 0.04761904762 | 0             |  | inf           | #DIV/0! |
| AMP2-A  | 0.04761904762 | 0.04761904762 | 0             |  | inf           | #DIV/0! |
| RAMP3   | 0.04761904762 | 0.04761904762 | 0.2222222222  |  | 0.1375        | #DIV/0! |
| RAN     | 0.09523809524 | 0.09523809524 | 0.05555555556 |  | 1.473684211   | #DIV/0! |
| RANBP1  | 0.04761904762 | 0.04761904762 | 0.05555555556 |  | 0.7           | #DIV/0! |
| RANBP1  | 0.1428571429  | 0.1428571429  | 0.05555555556 |  | 2.3333333333  | #DIV/0! |
| RANBP1  | 0             | 0             | 0.05555555556 |  | 0             | #DIV/0! |
| RANBP2  | 0             | 0             | 0.05555555556 |  | 0             | #DIV/0! |
| RANBP3  | 0.1428571429  | 0.1428571429  | 0.05555555556 |  | 2.3333333333  | #DIV/0! |
| RANBP3  | 0.04761904762 | 0.04761904762 | 0.05555555556 |  | 0.7           | #DIV/0! |
| RANBP6  | 0.04761904762 | 0.04761904762 | 0.05555555556 |  | 0.7           | #DIV/0! |
| ANGAP   | 0             | 0             | 0.1111111111  |  | 0             | #DIV/0! |
| RANGRI  | 0.04761904762 | 0.04761904762 | 0.05555555556 |  | 0.7           | #DIV/0! |
| RAP1A   | 0.04761904762 | 0.04761904762 | 0             |  | inf           | #DIV/0! |
| RAP1B   | 0.09523809524 | 0.09523809524 | 0.05555555556 |  | 1.473684211   | #DIV/0! |
| APIGA   | 0.04761904762 | 0.04761904762 | 0.1111111111  |  | 0.325         | #DIV/0! |
| APIGAF  | 0             | 0             | 0.1111111111  |  | 0             | #DIV/0! |
| APIGDS  | 0             | 0             | 0.05555555556 |  | 0             | #DIV/0! |
| RAP2B   | 0.1904761905  | 0.1904761905  | 0.1111111111  |  | 1.529411765   | #DIV/0! |
| APGEF   | 0.09523809524 | 0.09523809524 | 0.05555555556 |  | 1.473684211   | #DIV/0! |
| APGEF   | 0             | 0             | 0.05555555556 |  | 0             | #DIV/0! |
| APGEF   | 0.04761904762 | 0.04761904762 | 0.05555555556 |  | 0.7           | #DIV/0! |
| APGEF   | 0             | 0             | 0.1111111111  |  | 0             | #DIV/0! |
| PGEF4   | 0             | 0             | 0.1111111111  |  | 0             | #DIV/0! |
| APGEF   | 0.04761904762 | 0.04761904762 | 0.16666666667 |  | 0.2           | #DIV/0! |
| APGEF   | 0.04761904762 | 0.04761904762 | 0             |  | inf           | #DIV/0! |
| APGEFI  | 0.09523809524 | 0.09523809524 | 0             |  | inf           | #DIV/0! |
| RAPH1   | 0.04761904762 | 0.04761904762 | 0.05555555556 |  | 0.7           | #DIV/0! |
| RAPSN   | 0             | 0             | 0.05555555556 |  | 0             | #DIV/0! |
| RARA    | 0.09523809524 | 0.09523809524 | 0             |  | inf           | #DIV/0! |
| ARA-AS  | 0.09523809524 | 0.09523809524 | 0             |  | inf           | #DIV/0! |
| RARB    | 0.04761904762 | 0.04761904762 | 0             |  | inf           | #DIV/0! |
| ARB-AS  | 0.04761904762 | 0.04761904762 | 0             |  | inf           | #DIV/0! |

|         |               |               |               |  |              |         |
|---------|---------------|---------------|---------------|--|--------------|---------|
| RARG    | 0.04761904762 | 0.04761904762 | 0.05555555556 |  | 0.7          | #DIV/0! |
| ARRES   | 0.1428571429  | 0.1428571429  | 0.05555555556 |  | 2.333333333  | #DIV/0! |
| ARRES   | 0.09523809524 | 0.09523809524 | 0.05555555556 |  | 1.473684211  | #DIV/0! |
| RARS    | 0             | 0             | 0.05555555556 |  | 0            | #DIV/0! |
| RASA1   | 0.04761904762 | 0.04761904762 | 0             |  | inf          | #DIV/0! |
| RASA2   | 0.1904761905  | 0.1904761905  | 0.05555555556 |  | 3.294117647  | #DIV/0! |
| RASA4   | 0.04761904762 | 0.04761904762 | 0.05555555556 |  | 0.7          | #DIV/0! |
| RASA4B  | 0.04761904762 | 0.04761904762 | 0.05555555556 |  | 0.7          | #DIV/0! |
| ASA4C   | 0.04761904762 | 0.04761904762 | 0.1666666667  |  | 0.2          | #DIV/0! |
| ASA4D   | 0.04761904762 | 0.04761904762 | 0.05555555556 |  | 0.7          | #DIV/0! |
| RASAL1  | 0             | 0             | 0.05555555556 |  | 0            | #DIV/0! |
| RASAL2  | 0.1428571429  | 0.1428571429  | 0             |  | inf          | #DIV/0! |
| SAL2-A  | 0.1428571429  | 0.1428571429  | 0             |  | inf          | #DIV/0! |
| RASD1   | 0.04761904762 | 0.04761904762 | 0.1111111111  |  | 0.325        | #DIV/0! |
| RASD2   | 0             | 0             | 0.1111111111  |  | 0            | #DIV/0! |
| RASEF   | 0             | 0             | 0.05555555556 |  | 0            | #DIV/0! |
| ASGEF1  | 0.1428571429  | 0.1428571429  | 0.05555555556 |  | 2.333333333  | #DIV/0! |
| ASGEF1  | 0             | 0             | 0.05555555556 |  | 0            | #DIV/0! |
| ASGEF1  | 0.09523809524 | 0.09523809524 | 0.05555555556 |  | 1.473684211  | #DIV/0! |
| ASGRF   | 0.04761904762 | 0.04761904762 | 0.05555555556 |  | 0.7          | #DIV/0! |
| ASGRF   | 0.04761904762 | 0.04761904762 | 0             |  | inf          | #DIV/0! |
| SGRF2-  | 0.04761904762 | 0.04761904762 | 0             |  | inf          | #DIV/0! |
| ASGRP   | 0             | 0             | 0             |  |              | #DIV/0! |
| ASGRP   | 0.04761904762 | 0.04761904762 | 0.05555555556 |  | 0.7          | #DIV/0! |
| RASIP1  | 0.09523809524 | 0.09523809524 | 0.1111111111  |  | 0.6842105263 | #DIV/0! |
| RASL10  | 0.04761904762 | 0.04761904762 | 0.1111111111  |  | 0.325        | #DIV/0! |
| RASL10  | 0.09523809524 | 0.09523809524 | 0             |  | inf          | #DIV/0! |
| RASL11  | 0.2380952381  | 0.2380952381  | 0.05555555556 |  | 4.375        | #DIV/0! |
| RASL12  | 0.04761904762 | 0.04761904762 | 0.05555555556 |  | 0.7          | #DIV/0! |
| RASSF1  | 0.09523809524 | 0.09523809524 | 0             |  | inf          | #DIV/0! |
| ASSF1-A | 0.09523809524 | 0.09523809524 | 0             |  | inf          | #DIV/0! |
| RASSF2  | 0.1904761905  | 0.1904761905  | 0.05555555556 |  | 3.294117647  | #DIV/0! |
| RASSF3  | 0.1428571429  | 0.1428571429  | 0.05555555556 |  | 2.333333333  | #DIV/0! |
| RASSF4  | 0.1428571429  | 0.1428571429  | 0.05555555556 |  | 2.333333333  | #DIV/0! |
| RASSF5  | 0.1428571429  | 0.1428571429  | 0             |  | inf          | #DIV/0! |
| RASSF6  | 0.09523809524 | 0.09523809524 | 0.05555555556 |  | 1.473684211  | #DIV/0! |
| RASSF7  | 0.04761904762 | 0.04761904762 | 0             |  | inf          | #DIV/0! |
| RASSF8  | 0.04761904762 | 0.04761904762 | 0.05555555556 |  | 0.7          | #DIV/0! |
| ASSF8-A | 0.04761904762 | 0.04761904762 | 0.05555555556 |  | 0.7          | #DIV/0! |
| RASSF9  | 0.04761904762 | 0.04761904762 | 0.05555555556 |  | 0.7          | #DIV/0! |
| RAVER1  | 0.1428571429  | 0.1428571429  | 0.1111111111  |  | 1.083333333  | #DIV/0! |
| RAVER2  | 0.04761904762 | 0.04761904762 | 0.05555555556 |  | 0.7          | #DIV/0! |
| RAX     | 0.09523809524 | 0.09523809524 | 0             |  | inf          | #DIV/0! |
| RAX2    | 0.09523809524 | 0.09523809524 | 0.05555555556 |  | 1.473684211  | #DIV/0! |
| RBICC1  | 0.09523809524 | 0.09523809524 | 0.1111111111  |  | 0.6842105263 | #DIV/0! |
| RBAK    | 0.04761904762 | 0.04761904762 | 0.1666666667  |  | 0.2          | #DIV/0! |
| K-RBAK  | 0.04761904762 | 0.04761904762 | 0.1666666667  |  | 0.2          | #DIV/0! |
| RBAKDN  | 0.04761904762 | 0.04761904762 | 0.1666666667  |  | 0.2          | #DIV/0! |
| RBBP4   | 0.04761904762 | 0.04761904762 | 0.1111111111  |  | 0.325        | #DIV/0! |
| RBBP5   | 0.1904761905  | 0.1904761905  | 0             |  | inf          | #DIV/0! |
| RBBP6   | 0.04761904762 | 0.04761904762 | 0             |  | inf          | #DIV/0! |



|               |               |               |               |  |              |         |
|---------------|---------------|---------------|---------------|--|--------------|---------|
| <b>RBBP8</b>  | 0.04761904762 | 0.04761904762 | 0.05555555556 |  | 0.7          | #DIV/0! |
| <b>BBP8N</b>  | 0.1428571429  | 0.1428571429  | 0.2222222222  |  | 0.4583333333 | #DIV/0! |
| <b>RBBP9</b>  | 0.1904761905  | 0.1904761905  | 0.05555555556 |  | 3.294117647  | #DIV/0! |
| <b>RBCK1</b>  | 0.1904761905  | 0.1904761905  | 0.05555555556 |  | 3.294117647  | #DIV/0! |
| <b>RBFA</b>   | 0.04761904762 | 0.04761904762 | 0.05555555556 |  | 0.7          | #DIV/0! |
| <b>RBFADN</b> | 0.04761904762 | 0.04761904762 | 0.05555555556 |  | 0.7          | #DIV/0! |
| <b>RBFOX1</b> | 0.04761904762 | 0.04761904762 | 0             |  | inf          | #DIV/0! |
| <b>RBFOX2</b> | 0             | 0             | 0.1111111111  |  | 0            | #DIV/0! |
| <b>RBFOX3</b> | 0.04761904762 | 0.04761904762 | 0             |  | inf          | #DIV/0! |
| <b>RBIS</b>   | 0.1428571429  | 0.1428571429  | 0.1111111111  |  | 1.083333333  | #DIV/0! |
| <b>RBKS</b>   | 0             | 0             | 0.1111111111  |  | 0            | #DIV/0! |
| <b>RBL1</b>   | 0.09523809524 | 0.09523809524 | 0.1111111111  |  | 0.6842105263 | #DIV/0! |
| <b>RBL2</b>   | 0.04761904762 | 0.04761904762 | 0.05555555556 |  | 0.7          | #DIV/0! |
| <b>RBM11</b>  | 0.04761904762 | 0.04761904762 | 0.1111111111  |  | 0.325        | #DIV/0! |
| <b>RBM12</b>  | 0.09523809524 | 0.09523809524 | 0.1111111111  |  | 0.6842105263 | #DIV/0! |
| <b>RBM12B</b> | 0.1904761905  | 0.1904761905  | 0.1111111111  |  | 1.529411765  | #DIV/0! |
| <b>M12B-A</b> | 0.1904761905  | 0.1904761905  | 0.1111111111  |  | 1.529411765  | #DIV/0! |
| <b>RBM15</b>  | 0.04761904762 | 0.04761904762 | 0             |  | inf          | #DIV/0! |
| <b>BM15-A</b> | 0.04761904762 | 0.04761904762 | 0             |  | inf          | #DIV/0! |
| <b>RBM15B</b> | 0.04761904762 | 0.04761904762 | 0             |  | inf          | #DIV/0! |
| <b>RBM17</b>  | 0.09523809524 | 0.09523809524 | 0.1111111111  |  | 0.6842105263 | #DIV/0! |
| <b>RBM18</b>  | 0.09523809524 | 0.09523809524 | 0.05555555556 |  | 1.473684211  | #DIV/0! |
| <b>RBM19</b>  | 0             | 0             | 0.05555555556 |  | 0            | #DIV/0! |
| <b>RBM20</b>  | 0.1428571429  | 0.1428571429  | 0.05555555556 |  | 2.333333333  | #DIV/0! |
| <b>RBM23</b>  | 0             | 0             | 0.05555555556 |  | 0            | #DIV/0! |
| <b>RBM25</b>  | 0.09523809524 | 0.09523809524 | 0             |  | inf          | #DIV/0! |
| <b>RBM28</b>  | 0.04761904762 | 0.04761904762 | 0.05555555556 |  | 0.7          | #DIV/0! |
| <b>RBM33</b>  | 0.1428571429  | 0.1428571429  | 0.05555555556 |  | 2.333333333  | #DIV/0! |
| <b>RBM34</b>  | 0.1428571429  | 0.1428571429  | 0.05555555556 |  | 2.333333333  | #DIV/0! |
| <b>RBM38</b>  | 0.1428571429  | 0.1428571429  | 0.2222222222  |  | 0.4583333333 | #DIV/0! |
| <b>RBM39</b>  | 0.09523809524 | 0.09523809524 | 0.1111111111  |  | 0.6842105263 | #DIV/0! |
| <b>RBM42</b>  | 0.04761904762 | 0.04761904762 | 0.05555555556 |  | 0.7          | #DIV/0! |
| <b>RBM43</b>  | 0             | 0             | 0.05555555556 |  | 0            | #DIV/0! |
| <b>RBM44</b>  | 0             | 0             | 0.05555555556 |  | 0            | #DIV/0! |
| <b>RBM45</b>  | 0             | 0             | 0.1111111111  |  | 0            | #DIV/0! |
| <b>RBM46</b>  | 0             | 0             | 0.05555555556 |  | 0            | #DIV/0! |
| <b>RBM47</b>  | 0.1904761905  | 0.1904761905  | 0.05555555556 |  | 3.294117647  | #DIV/0! |
| <b>RBM48</b>  | 0.04761904762 | 0.04761904762 | 0.1111111111  |  | 0.325        | #DIV/0! |
| <b>RBM5</b>   | 0.09523809524 | 0.09523809524 | 0             |  | inf          | #DIV/0! |
| <b>BM5-AS</b> | 0.09523809524 | 0.09523809524 | 0             |  | inf          | #DIV/0! |
| <b>RBM6</b>   | 0.09523809524 | 0.09523809524 | 0             |  | inf          | #DIV/0! |
| <b>RBMS1</b>  | 0             | 0             | 0.05555555556 |  | 0            | #DIV/0! |
| <b>RBMS2</b>  | 0.1428571429  | 0.1428571429  | 0.05555555556 |  | 2.333333333  | #DIV/0! |
| <b>RBMS3</b>  | 0.04761904762 | 0.04761904762 | 0             |  | inf          | #DIV/0! |
| <b>BMS3-A</b> | 0.04761904762 | 0.04761904762 | 0             |  | inf          | #DIV/0! |
| <b>BMS3-A</b> | 0.04761904762 | 0.04761904762 | 0             |  | inf          | #DIV/0! |
| <b>RBMXL</b>  | 0.04761904762 | 0.04761904762 | 0.05555555556 |  | 0.7          | #DIV/0! |
| <b>RBMXL</b>  | 0.04761904762 | 0.04761904762 | 0             |  | inf          | #DIV/0! |
| <b>RBP1</b>   | 0.1428571429  | 0.1428571429  | 0.05555555556 |  | 2.333333333  | #DIV/0! |
| <b>RBP2</b>   | 0.1428571429  | 0.1428571429  | 0.05555555556 |  | 2.333333333  | #DIV/0! |
| <b>RBP3</b>   | 0.1428571429  | 0.1428571429  | 0.05555555556 |  | 2.333333333  | #DIV/0! |

|               |               |               |               |  |              |         |
|---------------|---------------|---------------|---------------|--|--------------|---------|
| <b>RBP4</b>   | 0.1428571429  | 0.1428571429  | 0.05555555556 |  | 2.333333333  | #DIV/0! |
| <b>RBP5</b>   | 0.04761904762 | 0.04761904762 | 0.1111111111  |  | 0.325        | #DIV/0! |
| <b>RBP7</b>   | 0             | 0             | 0.1111111111  |  | 0            | #DIV/0! |
| <b>RBPJL</b>  | 0.1428571429  | 0.1428571429  | 0.1666666667  |  | 0.6666666667 | #DIV/0! |
| <b>RBPMS</b>  | 0.04761904762 | 0.04761904762 | 0.1111111111  |  | 0.325        | #DIV/0! |
| <b>BPMS-A</b> | 0.04761904762 | 0.04761904762 | 0.1111111111  |  | 0.325        | #DIV/0! |
| <b>BPMS2</b>  | 0.04761904762 | 0.04761904762 | 0.05555555556 |  | 0.7          | #DIV/0! |
| <b>RBSN</b>   | 0.04761904762 | 0.04761904762 | 0             |  | inf          | #DIV/0! |
| <b>RBX1</b>   | 0             | 0             | 0.1111111111  |  | 0            | #DIV/0! |
| <b>RC3H1</b>  | 0.1428571429  | 0.1428571429  | 0             |  | inf          | #DIV/0! |
| <b>RC3H2</b>  | 0.09523809524 | 0.09523809524 | 0.05555555556 |  | 1.473684211  | #DIV/0! |
| <b>RCAN1</b>  | 0.04761904762 | 0.04761904762 | 0.1666666667  |  | 0.2          | #DIV/0! |
| <b>RCAN2</b>  | 0.04761904762 | 0.04761904762 | 0.05555555556 |  | 0.7          | #DIV/0! |
| <b>RCAN3</b>  | 0.04761904762 | 0.04761904762 | 0.1111111111  |  | 0.325        | #DIV/0! |
| <b>CAN3A</b>  | 0.04761904762 | 0.04761904762 | 0.1111111111  |  | 0.325        | #DIV/0! |
| <b>RCC1</b>   | 0.04761904762 | 0.04761904762 | 0.1111111111  |  | 0.325        | #DIV/0! |
| <b>RCC1L</b>  | 0.1428571429  | 0.1428571429  | 0.1666666667  |  | 0.6666666667 | #DIV/0! |
| <b>RCC2</b>   | 0.04761904762 | 0.04761904762 | 0.1111111111  |  | 0.325        | #DIV/0! |
| <b>RCCD1</b>  | 0.04761904762 | 0.04761904762 | 0.05555555556 |  | 0.7          | #DIV/0! |
| <b>RCHY1</b>  | 0.04761904762 | 0.04761904762 | 0.05555555556 |  | 0.7          | #DIV/0! |
| <b>RCL1</b>   | 0.04761904762 | 0.04761904762 | 0.05555555556 |  | 0.7          | #DIV/0! |
| <b>RCN2</b>   | 0.04761904762 | 0.04761904762 | 0.05555555556 |  | 0.7          | #DIV/0! |
| <b>RCN3</b>   | 0.09523809524 | 0.09523809524 | 0.1111111111  |  | 0.6842105263 | #DIV/0! |
| <b>RCOR3</b>  | 0.1428571429  | 0.1428571429  | 0             |  | inf          | #DIV/0! |
| <b>RCS1</b>   | 0.1428571429  | 0.1428571429  | 0             |  | inf          | #DIV/0! |
| <b>RD3</b>    | 0.1428571429  | 0.1428571429  | 0             |  | inf          | #DIV/0! |
| <b>RDH10</b>  | 0.1904761905  | 0.1904761905  | 0.1666666667  |  | 0.9411764706 | #DIV/0! |
| <b>DH10-A</b> | 0.1904761905  | 0.1904761905  | 0.1666666667  |  | 0.9411764706 | #DIV/0! |
| <b>RDH13</b>  | 0.09523809524 | 0.09523809524 | 0.05555555556 |  | 1.473684211  | #DIV/0! |
| <b>RDH14</b>  | 0             | 0             | 0.05555555556 |  | 0            | #DIV/0! |
| <b>RDH16</b>  | 0.1428571429  | 0.1428571429  | 0.05555555556 |  | 2.333333333  | #DIV/0! |
| <b>RDH5</b>   | 0.04761904762 | 0.04761904762 | 0.05555555556 |  | 0.7          | #DIV/0! |
| <b>RDH8</b>   | 0.1428571429  | 0.1428571429  | 0.1111111111  |  | 1.083333333  | #DIV/0! |
| <b>RDM1</b>   | 0.09523809524 | 0.09523809524 | 0             |  | inf          | #DIV/0! |
| <b>RDM1P5</b> | 0.09523809524 | 0.09523809524 | 0             |  | inf          | #DIV/0! |
| <b>REC114</b> | 0.04761904762 | 0.04761904762 | 0.05555555556 |  | 0.7          | #DIV/0! |
| <b>RECK</b>   | 0.09523809524 | 0.09523809524 | 0.05555555556 |  | 1.473684211  | #DIV/0! |
| <b>RECQL</b>  | 0.04761904762 | 0.04761904762 | 0.05555555556 |  | 0.7          | #DIV/0! |
| <b>RECQL4</b> | 0.04761904762 | 0.04761904762 | 0.1666666667  |  | 0.2          | #DIV/0! |
| <b>RECQL5</b> | 0.04761904762 | 0.04761904762 | 0.05555555556 |  | 0.7          | #DIV/0! |
| <b>REELD1</b> | 0             | 0             | 0.05555555556 |  | 0            | #DIV/0! |
| <b>REEP1</b>  | 0             | 0             | 0.05555555556 |  | 0            | #DIV/0! |
| <b>REEP2</b>  | 0.04761904762 | 0.04761904762 | 0             |  | inf          | #DIV/0! |
| <b>REEP3</b>  | 0.09523809524 | 0.09523809524 | 0.1111111111  |  | 0.6842105263 | #DIV/0! |
| <b>REEP4</b>  | 0.09523809524 | 0.09523809524 | 0.1111111111  |  | 0.6842105263 | #DIV/0! |
| <b>REEP5</b>  | 0.04761904762 | 0.04761904762 | 0             |  | inf          | #DIV/0! |
| <b>REEP6</b>  | 0.09523809524 | 0.09523809524 | 0.1111111111  |  | 0.6842105263 | #DIV/0! |
| <b>REG1A</b>  | 0             | 0             | 0.05555555556 |  | 0            | #DIV/0! |
| <b>REG1B</b>  | 0             | 0             | 0.05555555556 |  | 0            | #DIV/0! |
| <b>REG1CF</b> | 0             | 0             | 0.05555555556 |  | 0            | #DIV/0! |
| <b>REG3A</b>  | 0             | 0             | 0.05555555556 |  | 0            | #DIV/0! |

|        |               |               |               |  |              |         |
|--------|---------------|---------------|---------------|--|--------------|---------|
| REG3G  | 0             | 0             | 0.05555555556 |  | 0            | #DIV/0! |
| REG4   | 0.04761904762 | 0.04761904762 | 0.05555555556 |  | 0.7          | #DIV/0! |
| REL    | 0.09523809524 | 0.09523809524 | 0.05555555556 |  | 1.473684211  | #DIV/0! |
| RELB   | 0.09523809524 | 0.09523809524 | 0.1111111111  |  | 0.6842105263 | #DIV/0! |
| RELCH  | 0.09523809524 | 0.09523809524 | 0             |  | inf          | #DIV/0! |
| RELL2  | 0.04761904762 | 0.04761904762 | 0             |  | inf          | #DIV/0! |
| RELN   | 0.04761904762 | 0.04761904762 | 0.05555555556 |  | 0.7          | #DIV/0! |
| REM1   | 0.09523809524 | 0.09523809524 | 0.05555555556 |  | 1.473684211  | #DIV/0! |
| REM2   | 0             | 0             | 0.05555555556 |  | 0            | #DIV/0! |
| REN    | 0.2380952381  | 0.2380952381  | 0             |  | inf          | #DIV/0! |
| REP15  | 0.04761904762 | 0.04761904762 | 0.05555555556 |  | 0.7          | #DIV/0! |
| REPIN1 | 0.09523809524 | 0.09523809524 | 0.05555555556 |  | 1.473684211  | #DIV/0! |
| RER1   | 0             | 0             | 0.1111111111  |  | 0            | #DIV/0! |
| RERE   | 0             | 0             | 0.05555555556 |  | 0            | #DIV/0! |
| ERE-AS | 0             | 0             | 0.05555555556 |  | 0            | #DIV/0! |
| REREP3 | 0.2380952381  | 0.2380952381  | 0.1111111111  |  | 2.03125      | #DIV/0! |
| REG    | 0.04761904762 | 0.04761904762 | 0.1111111111  |  | 0.325        | #DIV/0! |
| ERG-AS | 0.04761904762 | 0.04761904762 | 0.1111111111  |  | 0.325        | #DIV/0! |
| RESF1  | 0.1428571429  | 0.1428571429  | 0.1111111111  |  | 1.083333333  | #DIV/0! |
| REST   | 0.1904761905  | 0.1904761905  | 0.05555555556 |  | 3.294117647  | #DIV/0! |
| RET    | 0.1428571429  | 0.1428571429  | 0.05555555556 |  | 2.333333333  | #DIV/0! |
| RETN   | 0.1428571429  | 0.1428571429  | 0.05555555556 |  | 2.333333333  | #DIV/0! |
| RETNLB | 0.09523809524 | 0.09523809524 | 0.05555555556 |  | 1.473684211  | #DIV/0! |
| ETREG  | 0.04761904762 | 0.04761904762 | 0.05555555556 |  | 0.7          | #DIV/0! |
| ETREG  | 0.04761904762 | 0.04761904762 | 0             |  | inf          | #DIV/0! |
| RETSAT | 0             | 0             | 0.05555555556 |  | 0            | #DIV/0! |
| REV1   | 0             | 0             | 0.05555555556 |  | 0            | #DIV/0! |
| REV3L  | 0             | 0             | 0             |  |              | #DIV/0! |
| REX1B  | 0.1428571429  | 0.1428571429  | 0.1111111111  |  | 1.083333333  | #DIV/0! |
| REXO1  | 0.09523809524 | 0.09523809524 | 0.1111111111  |  | 0.6842105263 | #DIV/0! |
| EXO1L2 | 0.1904761905  | 0.1904761905  | 0.1111111111  |  | 1.529411765  | #DIV/0! |
| REXO4  | 0.04761904762 | 0.04761904762 | 0             |  | inf          | #DIV/0! |
| REXO5  | 0.04761904762 | 0.04761904762 | 0             |  | inf          | #DIV/0! |
| RFC1   | 0.1904761905  | 0.1904761905  | 0.05555555556 |  | 3.294117647  | #DIV/0! |
| RFC2   | 0.1428571429  | 0.1428571429  | 0.1111111111  |  | 1.083333333  | #DIV/0! |
| RFC4   | 0.09523809524 | 0.09523809524 | 0.05555555556 |  | 1.473684211  | #DIV/0! |
| RFC5   | 0             | 0             | 0.05555555556 |  | 0            | #DIV/0! |
| RFESD  | 0.04761904762 | 0.04761904762 | 0             |  | inf          | #DIV/0! |
| RFK    | 0             | 0             | 0.05555555556 |  | 0            | #DIV/0! |
| RFLNA  | 0.04761904762 | 0.04761904762 | 0.05555555556 |  | 0.7          | #DIV/0! |
| RFLNB  | 0             | 0             | 0.1111111111  |  | 0            | #DIV/0! |
| RFNG   | 0.04761904762 | 0.04761904762 | 0             |  | inf          | #DIV/0! |
| RFPL1  | 0.04761904762 | 0.04761904762 | 0.1111111111  |  | 0.325        | #DIV/0! |
| RFPL1S | 0.04761904762 | 0.04761904762 | 0.1111111111  |  | 0.325        | #DIV/0! |
| RFPL2  | 0.04761904762 | 0.04761904762 | 0.1111111111  |  | 0.325        | #DIV/0! |
| RFPL3  | 0.04761904762 | 0.04761904762 | 0.1111111111  |  | 0.325        | #DIV/0! |
| RFPL3S | 0.04761904762 | 0.04761904762 | 0.1111111111  |  | 0.325        | #DIV/0! |
| RFPL4A | 0.1428571429  | 0.1428571429  | 0.05555555556 |  | 2.333333333  | #DIV/0! |
| FPL4AI | 0.1428571429  | 0.1428571429  | 0.05555555556 |  | 2.333333333  | #DIV/0! |
| RFT1   | 0.04761904762 | 0.04761904762 | 0             |  | inf          | #DIV/0! |
| RFTN1  | 0.04761904762 | 0.04761904762 | 0             |  | inf          | #DIV/0! |

|         |               |               |               |  |              |         |
|---------|---------------|---------------|---------------|--|--------------|---------|
| RFTN2   | 0             | 0             | 0.05555555556 |  | 0            | #DIV/0! |
| RFWD3   | 0.04761904762 | 0.04761904762 | 0             |  | inf          | #DIV/0! |
| RFX1    | 0.1428571429  | 0.1428571429  | 0.1111111111  |  | 1.083333333  | #DIV/0! |
| RFX2    | 0.1428571429  | 0.1428571429  | 0.05555555556 |  | 2.333333333  | #DIV/0! |
| RFX3    | 0.04761904762 | 0.04761904762 | 0.05555555556 |  | 0.7          | #DIV/0! |
| FX3-AS  | 0.04761904762 | 0.04761904762 | 0.05555555556 |  | 0.7          | #DIV/0! |
| RFX4    | 0.04761904762 | 0.04761904762 | 0.05555555556 |  | 0.7          | #DIV/0! |
| RFX5    | 0.1904761905  | 0.1904761905  | 0.05555555556 |  | 3.294117647  | #DIV/0! |
| RFX7    | 0.04761904762 | 0.04761904762 | 0.05555555556 |  | 0.7          | #DIV/0! |
| RFX8    | 0             | 0             | 0.05555555556 |  | 0            | #DIV/0! |
| RFXANK  | 0.1428571429  | 0.1428571429  | 0.1111111111  |  | 1.083333333  | #DIV/0! |
| RGMA    | 0.04761904762 | 0.04761904762 | 0.05555555556 |  | 0.7          | #DIV/0! |
| RGMB    | 0.04761904762 | 0.04761904762 | 0             |  | inf          | #DIV/0! |
| GMB-AS  | 0.04761904762 | 0.04761904762 | 0             |  | inf          | #DIV/0! |
| RGP1    | 0.09523809524 | 0.09523809524 | 0.05555555556 |  | 1.473684211  | #DIV/0! |
| RGPD1   | 0             | 0             | 0.05555555556 |  | 0            | #DIV/0! |
| RGPD2   | 0             | 0             | 0.05555555556 |  | 0            | #DIV/0! |
| RGPD3   | 0             | 0             | 0.05555555556 |  | 0            | #DIV/0! |
| RGPD4   | 0             | 0             | 0.05555555556 |  | 0            | #DIV/0! |
| GPD4-AS | 0             | 0             | 0.05555555556 |  | 0            | #DIV/0! |
| RGPD5   | 0             | 0             | 0.05555555556 |  | 0            | #DIV/0! |
| RGPD6   | 0             | 0             | 0.05555555556 |  | 0            | #DIV/0! |
| RGPD8   | 0             | 0             | 0.05555555556 |  | 0            | #DIV/0! |
| RGR     | 0.1428571429  | 0.1428571429  | 0             |  | inf          | #DIV/0! |
| RGS1    | 0.1428571429  | 0.1428571429  | 0             |  | inf          | #DIV/0! |
| RGS10   | 0.2380952381  | 0.2380952381  | 0             |  | inf          | #DIV/0! |
| RGS11   | 0.04761904762 | 0.04761904762 | 0.2222222222  |  | 0.1375       | #DIV/0! |
| RGS12   | 0.04761904762 | 0.04761904762 | 0             |  | inf          | #DIV/0! |
| RGS13   | 0.1428571429  | 0.1428571429  | 0             |  | inf          | #DIV/0! |
| RGS14   | 0.09523809524 | 0.09523809524 | 0.05555555556 |  | 1.473684211  | #DIV/0! |
| RGS16   | 0.1428571429  | 0.1428571429  | 0             |  | inf          | #DIV/0! |
| RGS18   | 0.1428571429  | 0.1428571429  | 0             |  | inf          | #DIV/0! |
| RGS19   | 0.1428571429  | 0.1428571429  | 0.2222222222  |  | 0.4583333333 | #DIV/0! |
| RGS2    | 0.1428571429  | 0.1428571429  | 0             |  | inf          | #DIV/0! |
| RGS20   | 0.1428571429  | 0.1428571429  | 0.1111111111  |  | 1.083333333  | #DIV/0! |
| RGS21   | 0.1428571429  | 0.1428571429  | 0             |  | inf          | #DIV/0! |
| RGS22   | 0.1904761905  | 0.1904761905  | 0.1111111111  |  | 1.529411765  | #DIV/0! |
| RGS3    | 0.04761904762 | 0.04761904762 | 0.05555555556 |  | 0.7          | #DIV/0! |
| RGS4    | 0.1428571429  | 0.1428571429  | 0             |  | inf          | #DIV/0! |
| RGS5    | 0.1428571429  | 0.1428571429  | 0             |  | inf          | #DIV/0! |
| RGS6    | 0.04761904762 | 0.04761904762 | 0             |  | inf          | #DIV/0! |
| RGS7    | 0.1428571429  | 0.1428571429  | 0             |  | inf          | #DIV/0! |
| RGS7BP  | 0.04761904762 | 0.04761904762 | 0             |  | inf          | #DIV/0! |
| RGS8    | 0.1428571429  | 0.1428571429  | 0             |  | inf          | #DIV/0! |
| RGS9    | 0.04761904762 | 0.04761904762 | 0             |  | inf          | #DIV/0! |
| RGS9BP  | 0.04761904762 | 0.04761904762 | 0.05555555556 |  | 0.7          | #DIV/0! |
| RGSL1   | 0.1428571429  | 0.1428571429  | 0             |  | inf          | #DIV/0! |
| RHAG    | 0.04761904762 | 0.04761904762 | 0             |  | inf          | #DIV/0! |
| RHBDD1  | 0             | 0             | 0.05555555556 |  | 0            | #DIV/0! |
| RHBDD2  | 0.1428571429  | 0.1428571429  | 0.1111111111  |  | 1.083333333  | #DIV/0! |
| RHBDD3  | 0.04761904762 | 0.04761904762 | 0.1111111111  |  | 0.325        | #DIV/0! |

|         |               |               |               |  |              |         |
|---------|---------------|---------------|---------------|--|--------------|---------|
| RHBDF1  | 0.04761904762 | 0.04761904762 | 0.2222222222  |  | 0.1375       | #DIV/0! |
| RHBDF2  | 0.04761904762 | 0.04761904762 | 0             |  | inf          | #DIV/0! |
| RHBDL1  | 0.04761904762 | 0.04761904762 | 0.2222222222  |  | 0.1375       | #DIV/0! |
| RHBDL2  | 0.04761904762 | 0.04761904762 | 0.05555555556 |  | 0.7          | #DIV/0! |
| RHBDL3  | 0             | 0             | 0             |  |              | #DIV/0! |
| RHBG    | 0.1428571429  | 0.1428571429  | 0.1111111111  |  | 1.083333333  | #DIV/0! |
| RHCE    | 0.04761904762 | 0.04761904762 | 0.1111111111  |  | 0.325        | #DIV/0! |
| RHCG    | 0.04761904762 | 0.04761904762 | 0.05555555556 |  | 0.7          | #DIV/0! |
| RHD     | 0.04761904762 | 0.04761904762 | 0.1111111111  |  | 0.325        | #DIV/0! |
| RHEB    | 0.09523809524 | 0.09523809524 | 0.05555555556 |  | 1.473684211  | #DIV/0! |
| RHEBL1  | 0.04761904762 | 0.04761904762 | 0.05555555556 |  | 0.7          | #DIV/0! |
| RHEX    | 0.1428571429  | 0.1428571429  | 0             |  | inf          | #DIV/0! |
| RHNO1   | 0.04761904762 | 0.04761904762 | 0.1666666667  |  | 0.2          | #DIV/0! |
| RHO     | 0.09523809524 | 0.09523809524 | 0.05555555556 |  | 1.473684211  | #DIV/0! |
| RHOA    | 0.1428571429  | 0.1428571429  | 0             |  | inf          | #DIV/0! |
| RHOB    | 0             | 0             | 0.05555555556 |  | 0            | #DIV/0! |
| HOBTB1  | 0.04761904762 | 0.04761904762 | 0.1111111111  |  | 0.325        | #DIV/0! |
| HOBTB2  | 0.04761904762 | 0.04761904762 | 0.1111111111  |  | 0.325        | #DIV/0! |
| HOBTB3  | 0.04761904762 | 0.04761904762 | 0             |  | inf          | #DIV/0! |
| RHOC    | 0.04761904762 | 0.04761904762 | 0.05555555556 |  | 0.7          | #DIV/0! |
| RHOF    | 0.04761904762 | 0.04761904762 | 0.1111111111  |  | 0.325        | #DIV/0! |
| RHOG    | 0.04761904762 | 0.04761904762 | 0             |  | inf          | #DIV/0! |
| RHOH    | 0.1904761905  | 0.1904761905  | 0.05555555556 |  | 3.294117647  | #DIV/0! |
| RHOQ    | 0             | 0             | 0.05555555556 |  | 0            | #DIV/0! |
| RHOT1   | 0             | 0             | 0             |  |              | #DIV/0! |
| RHOT2   | 0.04761904762 | 0.04761904762 | 0.2222222222  |  | 0.1375       | #DIV/0! |
| RHOU    | 0.1428571429  | 0.1428571429  | 0             |  | inf          | #DIV/0! |
| RHPN1   | 0.04761904762 | 0.04761904762 | 0.05555555556 |  | 0.7          | #DIV/0! |
| HPN1-A1 | 0.04761904762 | 0.04761904762 | 0.05555555556 |  | 0.7          | #DIV/0! |
| RHPN2   | 0.04761904762 | 0.04761904762 | 0.05555555556 |  | 0.7          | #DIV/0! |
| RIBC2   | 0             | 0             | 0.1111111111  |  | 0            | #DIV/0! |
| RIC1    | 0.04761904762 | 0.04761904762 | 0.05555555556 |  | 0.7          | #DIV/0! |
| RIC8A   | 0.04761904762 | 0.04761904762 | 0             |  | inf          | #DIV/0! |
| RIC8B   | 0.04761904762 | 0.04761904762 | 0.05555555556 |  | 0.7          | #DIV/0! |
| RICTOR  | 0.04761904762 | 0.04761904762 | 0.05555555556 |  | 0.7          | #DIV/0! |
| RIDA    | 0.1904761905  | 0.1904761905  | 0.1111111111  |  | 1.529411765  | #DIV/0! |
| RIF1    | 0             | 0             | 0.05555555556 |  | 0            | #DIV/0! |
| RIIAD1  | 0.1428571429  | 0.1428571429  | 0             |  | inf          | #DIV/0! |
| RILP    | 0             | 0             | 0.1111111111  |  | 0            | #DIV/0! |
| RILPL1  | 0.04761904762 | 0.04761904762 | 0.1111111111  |  | 0.325        | #DIV/0! |
| RILPL2  | 0.04761904762 | 0.04761904762 | 0.1111111111  |  | 0.325        | #DIV/0! |
| RIMBP2  | 0.09523809524 | 0.09523809524 | 0.05555555556 |  | 1.473684211  | #DIV/0! |
| RIMBP3  | 0.04761904762 | 0.04761904762 | 0.05555555556 |  | 0.7          | #DIV/0! |
| RIMBP3I | 0.04761904762 | 0.04761904762 | 0.05555555556 |  | 0.7          | #DIV/0! |
| RIMBP3O | 0.04761904762 | 0.04761904762 | 0.05555555556 |  | 0.7          | #DIV/0! |
| RIMKLA  | 0.04761904762 | 0.04761904762 | 0.05555555556 |  | 0.7          | #DIV/0! |
| RIMKLB  | 0.04761904762 | 0.04761904762 | 0.1111111111  |  | 0.325        | #DIV/0! |
| RIMS2   | 0.1904761905  | 0.1904761905  | 0.1111111111  |  | 1.529411765  | #DIV/0! |
| RIMS3   | 0.04761904762 | 0.04761904762 | 0.05555555556 |  | 0.7          | #DIV/0! |
| RIMS4   | 0.1428571429  | 0.1428571429  | 0.1666666667  |  | 0.6666666667 | #DIV/0! |
| RIN2    | 0.1904761905  | 0.1904761905  | 0.05555555556 |  | 3.294117647  | #DIV/0! |

|                |               |               |               |  |              |         |
|----------------|---------------|---------------|---------------|--|--------------|---------|
| <b>RINL</b>    | 0.04761904762 | 0.04761904762 | 0.05555555556 |  | 0.7          | #DIV/0! |
| <b>RINT1</b>   | 0.04761904762 | 0.04761904762 | 0.05555555556 |  | 0.7          | #DIV/0! |
| <b>RIOK2</b>   | 0.04761904762 | 0.04761904762 | 0             |  | inf          | #DIV/0! |
| <b>RIOK3</b>   | 0.04761904762 | 0.04761904762 | 0.05555555556 |  | 0.7          | #DIV/0! |
| <b>RIOX1</b>   | 0.09523809524 | 0.09523809524 | 0             |  | inf          | #DIV/0! |
| <b>RIOX2</b>   | 0.04761904762 | 0.04761904762 | 0.05555555556 |  | 0.7          | #DIV/0! |
| <b>RIPK2</b>   | 0.1904761905  | 0.1904761905  | 0.1111111111  |  | 1.529411765  | #DIV/0! |
| <b>RIPK4</b>   | 0.04761904762 | 0.04761904762 | 0.1111111111  |  | 0.325        | #DIV/0! |
| <b>RIPOR1</b>  | 0.1428571429  | 0.1428571429  | 0.05555555556 |  | 2.333333333  | #DIV/0! |
| <b>RIPOR2</b>  | 0             | 0             | 0.05555555556 |  | 0            | #DIV/0! |
| <b>RIPOR3</b>  | 0.09523809524 | 0.09523809524 | 0.1666666667  |  | 0.4210526316 | #DIV/0! |
| <b>RIPPLY3</b> | 0.04761904762 | 0.04761904762 | 0.1666666667  |  | 0.2          | #DIV/0! |
| <b>RIT1</b>    | 0.1904761905  | 0.1904761905  | 0.1111111111  |  | 1.529411765  | #DIV/0! |
| <b>RIT2</b>    | 0.04761904762 | 0.04761904762 | 0             |  | inf          | #DIV/0! |
| <b>RITA1</b>   | 0             | 0             | 0.05555555556 |  | 0            | #DIV/0! |
| <b>RLBP1</b>   | 0.04761904762 | 0.04761904762 | 0.05555555556 |  | 0.7          | #DIV/0! |
| <b>RLF</b>     | 0.04761904762 | 0.04761904762 | 0.05555555556 |  | 0.7          | #DIV/0! |
| <b>RLN1</b>    | 0.04761904762 | 0.04761904762 | 0.05555555556 |  | 0.7          | #DIV/0! |
| <b>RLN2</b>    | 0.04761904762 | 0.04761904762 | 0.05555555556 |  | 0.7          | #DIV/0! |
| <b>RLN3</b>    | 0.1428571429  | 0.1428571429  | 0.1111111111  |  | 1.083333333  | #DIV/0! |
| <b>RMC1</b>    | 0.04761904762 | 0.04761904762 | 0.05555555556 |  | 0.7          | #DIV/0! |
| <b>RMDN1</b>   | 0.1904761905  | 0.1904761905  | 0.1111111111  |  | 1.529411765  | #DIV/0! |
| <b>RMDN2</b>   | 0             | 0             | 0.05555555556 |  | 0            | #DIV/0! |
| <b>MDN2-A</b>  | 0             | 0             | 0.05555555556 |  | 0            | #DIV/0! |
| <b>RMI1</b>    | 0             | 0             | 0.05555555556 |  | 0            | #DIV/0! |
| <b>RMI2</b>    | 0.04761904762 | 0.04761904762 | 0             |  | inf          | #DIV/0! |
| <b>RMND5A</b>  | 0             | 0             | 0.05555555556 |  | 0            | #DIV/0! |
| <b>RMND5B</b>  | 0.09523809524 | 0.09523809524 | 0.05555555556 |  | 1.473684211  | #DIV/0! |
| <b>RMRP</b>    | 0.09523809524 | 0.09523809524 | 0.05555555556 |  | 1.473684211  | #DIV/0! |
| <b>RMST</b>    | 0.1904761905  | 0.1904761905  | 0.05555555556 |  | 3.294117647  | #DIV/0! |
| <b>RN7SK</b>   | 0.04761904762 | 0.04761904762 | 0             |  | inf          | #DIV/0! |
| <b>RN7SL1</b>  | 0.04761904762 | 0.04761904762 | 0             |  | inf          | #DIV/0! |
| <b>RN7SL2</b>  | 0.04761904762 | 0.04761904762 | 0             |  | inf          | #DIV/0! |
| <b>RN7SL3</b>  | 0.04761904762 | 0.04761904762 | 0             |  | inf          | #DIV/0! |
| <b>N7SL832</b> | 0             | 0             | 0.05555555556 |  | 0            | #DIV/0! |
| <b>RNA5S1</b>  | 0.1428571429  | 0.1428571429  | 0             |  | inf          | #DIV/0! |
| <b>RNA5S10</b> | 0.1428571429  | 0.1428571429  | 0             |  | inf          | #DIV/0! |
| <b>RNA5S11</b> | 0.1428571429  | 0.1428571429  | 0             |  | inf          | #DIV/0! |
| <b>RNA5S12</b> | 0.1428571429  | 0.1428571429  | 0             |  | inf          | #DIV/0! |
| <b>RNA5S13</b> | 0.1428571429  | 0.1428571429  | 0             |  | inf          | #DIV/0! |
| <b>RNA5S14</b> | 0.1428571429  | 0.1428571429  | 0             |  | inf          | #DIV/0! |
| <b>RNA5S15</b> | 0.1428571429  | 0.1428571429  | 0             |  | inf          | #DIV/0! |
| <b>RNA5S16</b> | 0.1428571429  | 0.1428571429  | 0             |  | inf          | #DIV/0! |
| <b>RNA5S17</b> | 0.1428571429  | 0.1428571429  | 0             |  | inf          | #DIV/0! |
| <b>RNA5S2</b>  | 0.1428571429  | 0.1428571429  | 0             |  | inf          | #DIV/0! |
| <b>RNA5S3</b>  | 0.1428571429  | 0.1428571429  | 0             |  | inf          | #DIV/0! |
| <b>RNA5S4</b>  | 0.1428571429  | 0.1428571429  | 0             |  | inf          | #DIV/0! |
| <b>RNA5S5</b>  | 0.1428571429  | 0.1428571429  | 0             |  | inf          | #DIV/0! |
| <b>RNA5S6</b>  | 0.1428571429  | 0.1428571429  | 0             |  | inf          | #DIV/0! |
| <b>RNA5S7</b>  | 0.1428571429  | 0.1428571429  | 0             |  | inf          | #DIV/0! |
| <b>RNA5S8</b>  | 0.1428571429  | 0.1428571429  | 0             |  | inf          | #DIV/0! |

|         |               |               |              |  |              |         |
|---------|---------------|---------------|--------------|--|--------------|---------|
| RNASES9 | 0.1428571429  | 0.1428571429  | 0            |  | inf          | #DIV/0! |
| NASEH   | 0             | 0             | 0.0555555556 |  | 0            | #DIV/0! |
| ASEH1-  | 0             | 0             | 0.0555555556 |  | 0            | #DIV/0! |
| NASEH2  | 0.1428571429  | 0.1428571429  | 0.1111111111 |  | 1.083333333  | #DIV/0! |
| RNASEK  | 0             | 0             | 0.0555555556 |  | 0            | #DIV/0! |
| SEK-C17 | 0             | 0             | 0.0555555556 |  | 0            | #DIV/0! |
| RNASEL  | 0.1428571429  | 0.1428571429  | 0            |  | inf          | #DIV/0! |
| RND1    | 0.04761904762 | 0.04761904762 | 0.0555555556 |  | 0.7          | #DIV/0! |
| RND2    | 0.04761904762 | 0.04761904762 | 0            |  | inf          | #DIV/0! |
| RND3    | 0             | 0             | 0.0555555556 |  | 0            | #DIV/0! |
| RNF10   | 0             | 0             | 0.1111111111 |  | 0            | #DIV/0! |
| RNF103  | 0             | 0             | 0.0555555556 |  | 0            | #DIV/0! |
| 103-CH  | 0             | 0             | 0.0555555556 |  | 0            | #DIV/0! |
| RNF11   | 0.04761904762 | 0.04761904762 | 0.0555555556 |  | 0.7          | #DIV/0! |
| RNF111  | 0.04761904762 | 0.04761904762 | 0.0555555556 |  | 0.7          | #DIV/0! |
| RNF112  | 0.04761904762 | 0.04761904762 | 0.0555555556 |  | 0.7          | #DIV/0! |
| RNF114  | 0.09523809524 | 0.09523809524 | 0.1666666667 |  | 0.4210526316 | #DIV/0! |
| RNF115  | 0.1428571429  | 0.1428571429  | 0.0555555556 |  | 2.333333333  | #DIV/0! |
| RNF122  | 0.04761904762 | 0.04761904762 | 0.1111111111 |  | 0.325        | #DIV/0! |
| RNF123  | 0.09523809524 | 0.09523809524 | 0            |  | inf          | #DIV/0! |
| RNF125  | 0.09523809524 | 0.09523809524 | 0            |  | inf          | #DIV/0! |
| RNF126  | 0.09523809524 | 0.09523809524 | 0.1111111111 |  | 0.6842105263 | #DIV/0! |
| NF126P  | 0.09523809524 | 0.09523809524 | 0            |  | inf          | #DIV/0! |
| RNF13   | 0.1904761905  | 0.1904761905  | 0.1111111111 |  | 1.529411765  | #DIV/0! |
| RNF130  | 0.09523809524 | 0.09523809524 | 0.0555555556 |  | 1.473684211  | #DIV/0! |
| RNF133  | 0.04761904762 | 0.04761904762 | 0.0555555556 |  | 0.7          | #DIV/0! |
| RNF135  | 0             | 0             | 0            |  |              | #DIV/0! |
| RNF138  | 0.09523809524 | 0.09523809524 | 0            |  | inf          | #DIV/0! |
| NF138P  | 0.04761904762 | 0.04761904762 | 0.0555555556 |  | 0.7          | #DIV/0! |
| RNF139  | 0.1428571429  | 0.1428571429  | 0.1111111111 |  | 1.083333333  | #DIV/0! |
| NF139-A | 0.1428571429  | 0.1428571429  | 0.1111111111 |  | 1.083333333  | #DIV/0! |
| RNF14   | 0.04761904762 | 0.04761904762 | 0            |  | inf          | #DIV/0! |
| RNF144A | 0             | 0             | 0.0555555556 |  | 0            | #DIV/0! |
| F144A-A | 0             | 0             | 0.0555555556 |  | 0            | #DIV/0! |
| RNF145  | 0.04761904762 | 0.04761904762 | 0.0555555556 |  | 0.7          | #DIV/0! |
| RNF148  | 0.04761904762 | 0.04761904762 | 0.0555555556 |  | 0.7          | #DIV/0! |
| RNF149  | 0             | 0             | 0.0555555556 |  | 0            | #DIV/0! |
| RNF150  | 0             | 0             | 0.0555555556 |  | 0            | #DIV/0! |
| RNF151  | 0.09523809524 | 0.09523809524 | 0.2222222222 |  | 0.2894736842 | #DIV/0! |
| RNF152  | 0.09523809524 | 0.09523809524 | 0            |  | inf          | #DIV/0! |
| RNF157  | 0.04761904762 | 0.04761904762 | 0            |  | inf          | #DIV/0! |
| NF157-A | 0.04761904762 | 0.04761904762 | 0            |  | inf          | #DIV/0! |
| RNF165  | 0.04761904762 | 0.04761904762 | 0.0555555556 |  | 0.7          | #DIV/0! |
| RNF166  | 0.1904761905  | 0.1904761905  | 0            |  | inf          | #DIV/0! |
| RNF167  | 0             | 0             | 0.1111111111 |  | 0            | #DIV/0! |
| RNF168  | 0.1428571429  | 0.1428571429  | 0.0555555556 |  | 2.333333333  | #DIV/0! |
| RNF170  | 0.09523809524 | 0.09523809524 | 0.1666666667 |  | 0.4210526316 | #DIV/0! |
| RNF175  | 0             | 0             | 0.0555555556 |  | 0            | #DIV/0! |
| RNF180  | 0.04761904762 | 0.04761904762 | 0            |  | inf          | #DIV/0! |
| RNF181  | 0             | 0             | 0.0555555556 |  | 0            | #DIV/0! |
| RNF183  | 0.04761904762 | 0.04761904762 | 0.0555555556 |  | 0.7          | #DIV/0! |

|          |               |               |              |  |              |         |
|----------|---------------|---------------|--------------|--|--------------|---------|
| RNF185   | 0.04761904762 | 0.04761904762 | 0.1111111111 |  | 0.325        | #DIV/0! |
| RNF186   | 0.04761904762 | 0.04761904762 | 0.1111111111 |  | 0.325        | #DIV/0! |
| RNF187   | 0.1428571429  | 0.1428571429  | 0            |  | inf          | #DIV/0! |
| RNF19A   | 0.1904761905  | 0.1904761905  | 0.1111111111 |  | 1.529411765  | #DIV/0! |
| RNF19B   | 0.04761904762 | 0.04761904762 | 0.1111111111 |  | 0.325        | #DIV/0! |
| RNF2     | 0.1428571429  | 0.1428571429  | 0.0555555556 |  | 2.333333333  | #DIV/0! |
| RNF20    | 0.04761904762 | 0.04761904762 | 0            |  | inf          | #DIV/0! |
| RNF207   | 0             | 0             | 0.0555555556 |  | 0            | #DIV/0! |
| RNF208   | 0.1428571429  | 0.1428571429  | 0.0555555556 |  | 2.333333333  | #DIV/0! |
| RNF212   | 0.04761904762 | 0.04761904762 | 0            |  | inf          | #DIV/0! |
| RNF212H  | 0             | 0             | 0.1111111111 |  | 0            | #DIV/0! |
| RNF213   | 0.04761904762 | 0.04761904762 | 0            |  | inf          | #DIV/0! |
| RNF215   | 0.04761904762 | 0.04761904762 | 0.1111111111 |  | 0.325        | #DIV/0! |
| RNF216   | 0.04761904762 | 0.04761904762 | 0.1666666667 |  | 0.2          | #DIV/0! |
| RNF216-I | 0.04761904762 | 0.04761904762 | 0.1666666667 |  | 0.2          | #DIV/0! |
| RNF216P  | 0.04761904762 | 0.04761904762 | 0.1666666667 |  | 0.2          | #DIV/0! |
| RNF220   | 0.04761904762 | 0.04761904762 | 0.0555555556 |  | 0.7          | #DIV/0! |
| RNF222   | 0.04761904762 | 0.04761904762 | 0.0555555556 |  | 0.7          | #DIV/0! |
| RNF223   | 0             | 0             | 0.1111111111 |  | 0            | #DIV/0! |
| RNF224   | 0.1428571429  | 0.1428571429  | 0.0555555556 |  | 2.333333333  | #DIV/0! |
| RNF225   | 0.1428571429  | 0.1428571429  | 0.0555555556 |  | 2.333333333  | #DIV/0! |
| RNF227   | 0             | 0             | 0.0555555556 |  | 0            | #DIV/0! |
| RNF24    | 0.1904761905  | 0.1904761905  | 0.0555555556 |  | 3.294117647  | #DIV/0! |
| RNF25    | 0             | 0             | 0.0555555556 |  | 0            | #DIV/0! |
| RNF32    | 0.1428571429  | 0.1428571429  | 0.0555555556 |  | 2.333333333  | #DIV/0! |
| RNF34    | 0.04761904762 | 0.04761904762 | 0.1111111111 |  | 0.325        | #DIV/0! |
| RNF38    | 0.09523809524 | 0.09523809524 | 0.0555555556 |  | 1.473684211  | #DIV/0! |
| RNF4     | 0.04761904762 | 0.04761904762 | 0            |  | inf          | #DIV/0! |
| RNF40    | 0.04761904762 | 0.04761904762 | 0            |  | inf          | #DIV/0! |
| RNF41    | 0.09523809524 | 0.09523809524 | 0.0555555556 |  | 1.473684211  | #DIV/0! |
| RNF43    | 0.09523809524 | 0.09523809524 | 0            |  | inf          | #DIV/0! |
| RNF44    | 0.09523809524 | 0.09523809524 | 0.0555555556 |  | 1.473684211  | #DIV/0! |
| RNF5     | 0.04761904762 | 0.04761904762 | 0            |  | inf          | #DIV/0! |
| RNF5P1   | 0.09523809524 | 0.09523809524 | 0.1111111111 |  | 0.6842105263 | #DIV/0! |
| RNF7     | 0.1904761905  | 0.1904761905  | 0.0555555556 |  | 3.294117647  | #DIV/0! |
| RNF8     | 0.04761904762 | 0.04761904762 | 0.0555555556 |  | 0.7          | #DIV/0! |
| RNFT1    | 0.1428571429  | 0.1428571429  | 0            |  | inf          | #DIV/0! |
| RNFT1-D  | 0.1428571429  | 0.1428571429  | 0            |  | inf          | #DIV/0! |
| RNFT2    | 0             | 0             | 0.0555555556 |  | 0            | #DIV/0! |
| RNH1     | 0.04761904762 | 0.04761904762 | 0            |  | inf          | #DIV/0! |
| RNLS     | 0.1428571429  | 0.1428571429  | 0.1666666667 |  | 0.6666666667 | #DIV/0! |
| RNMT     | 0.09523809524 | 0.09523809524 | 0.0555555556 |  | 1.473684211  | #DIV/0! |
| RNPC3    | 0.04761904762 | 0.04761904762 | 0.0555555556 |  | 0.7          | #DIV/0! |
| RNPEP    | 0.1428571429  | 0.1428571429  | 0            |  | inf          | #DIV/0! |
| RNPEPL   | 0             | 0             | 0.0555555556 |  | 0            | #DIV/0! |
| RNPS1    | 0.09523809524 | 0.09523809524 | 0.2222222222 |  | 0.2894736842 | #DIV/0! |
| RNU1-1   | 0.1904761905  | 0.1904761905  | 0.1666666667 |  | 0.9411764706 | #DIV/0! |
| RNU1-2   | 0.1904761905  | 0.1904761905  | 0.1666666667 |  | 0.9411764706 | #DIV/0! |
| RNU1-3   | 0.1904761905  | 0.1904761905  | 0.1666666667 |  | 0.9411764706 | #DIV/0! |
| RNU1-4   | 0.1904761905  | 0.1904761905  | 0.1666666667 |  | 0.9411764706 | #DIV/0! |
| RNU105I  | 0.1904761905  | 0.1904761905  | 0.1111111111 |  | 1.529411765  | #DIV/0! |



|         |               |               |               |  |              |         |
|---------|---------------|---------------|---------------|--|--------------|---------|
| RNU105C | 0.1428571429  | 0.1428571429  | 0.1111111111  |  | 1.083333333  | #DIV/0! |
| RNU11   | 0.04761904762 | 0.04761904762 | 0.1111111111  |  | 0.325        | #DIV/0! |
| RNU4-1  | 0             | 0             | 0.1111111111  |  | 0            | #DIV/0! |
| RNU4-2  | 0             | 0             | 0.1111111111  |  | 0            | #DIV/0! |
| NU4ATA  | 0             | 0             | 0.05555555556 |  | 0            | #DIV/0! |
| RNU5A-  | 0.04761904762 | 0.04761904762 | 0.05555555556 |  | 0.7          | #DIV/0! |
| RNU5B-  | 0.04761904762 | 0.04761904762 | 0.05555555556 |  | 0.7          | #DIV/0! |
| RNU5D-  | 0.04761904762 | 0.04761904762 | 0.05555555556 |  | 0.7          | #DIV/0! |
| RNU5E-  | 0.04761904762 | 0.04761904762 | 0.1111111111  |  | 0.325        | #DIV/0! |
| RNU5F-  | 0.04761904762 | 0.04761904762 | 0.05555555556 |  | 0.7          | #DIV/0! |
| RNU6-1  | 0.380952381   | 0.380952381   | 0.4444444444  |  | 0.5384615385 | #DIV/0! |
| RNU6-2  | 0.380952381   | 0.380952381   | 0.4444444444  |  | 0.5384615385 | #DIV/0! |
| RNU6-7  | 0.380952381   | 0.380952381   | 0.4444444444  |  | 0.5384615385 | #DIV/0! |
| RNU6-8  | 0.380952381   | 0.380952381   | 0.4444444444  |  | 0.5384615385 | #DIV/0! |
| RNU6-9  | 0.380952381   | 0.380952381   | 0.4444444444  |  | 0.5384615385 | #DIV/0! |
| NU6ATA  | 0.04761904762 | 0.04761904762 | 0             |  | inf          | #DIV/0! |
| J6ATAC  | 0.1428571429  | 0.1428571429  | 0.05555555556 |  | 2.333333333  | #DIV/0! |
| RNU7-1  | 0.04761904762 | 0.04761904762 | 0.1111111111  |  | 0.325        | #DIV/0! |
| RNVU1-  | 0.1428571429  | 0.1428571429  | 0.05555555556 |  | 2.333333333  | #DIV/0! |
| NVU1-1  | 0.1428571429  | 0.1428571429  | 0.05555555556 |  | 2.333333333  | #DIV/0! |
| NVU1-1  | 0.1428571429  | 0.1428571429  | 0.05555555556 |  | 2.333333333  | #DIV/0! |
| NVU1-1  | 0.09523809524 | 0.09523809524 | 0.05555555556 |  | 1.473684211  | #DIV/0! |
| NVU1-1  | 0.1904761905  | 0.1904761905  | 0.1666666667  |  | 0.9411764706 | #DIV/0! |
| NVU1-1  | 0.1428571429  | 0.1428571429  | 0.05555555556 |  | 2.333333333  | #DIV/0! |
| NVU1-2  | 0.09523809524 | 0.09523809524 | 0.05555555556 |  | 1.473684211  | #DIV/0! |
| RNVU1-3 | 0.1428571429  | 0.1428571429  | 0.05555555556 |  | 2.333333333  | #DIV/0! |
| RNVU1-4 | 0.09523809524 | 0.09523809524 | 0.05555555556 |  | 1.473684211  | #DIV/0! |
| RNVU1-6 | 0.1428571429  | 0.1428571429  | 0.05555555556 |  | 2.333333333  | #DIV/0! |
| RNVU1-7 | 0.1428571429  | 0.1428571429  | 0.05555555556 |  | 2.333333333  | #DIV/0! |
| RNVU1-8 | 0.1428571429  | 0.1428571429  | 0.05555555556 |  | 2.333333333  | #DIV/0! |
| RNY1    | 0.09523809524 | 0.09523809524 | 0.05555555556 |  | 1.473684211  | #DIV/0! |
| RNY3    | 0.09523809524 | 0.09523809524 | 0.05555555556 |  | 1.473684211  | #DIV/0! |
| RNY4    | 0.09523809524 | 0.09523809524 | 0.05555555556 |  | 1.473684211  | #DIV/0! |
| RNY5    | 0.09523809524 | 0.09523809524 | 0.05555555556 |  | 1.473684211  | #DIV/0! |
| ROBO1   | 0.04761904762 | 0.04761904762 | 0.05555555556 |  | 0.7          | #DIV/0! |
| ROBO2   | 0.04761904762 | 0.04761904762 | 0             |  | inf          | #DIV/0! |
| ROCK1   | 0.04761904762 | 0.04761904762 | 0.1111111111  |  | 0.325        | #DIV/0! |
| ROCKIP  | 0.09523809524 | 0.09523809524 | 0             |  | inf          | #DIV/0! |
| ROCK2   | 0             | 0             | 0.05555555556 |  | 0            | #DIV/0! |
| ROCR    | 0             | 0             | 0             |  |              | #DIV/0! |
| ROGDI   | 0.04761904762 | 0.04761904762 | 0             |  | inf          | #DIV/0! |
| ROMO1   | 0.09523809524 | 0.09523809524 | 0.1111111111  |  | 0.6842105263 | #DIV/0! |
| ROPN1   | 0.04761904762 | 0.04761904762 | 0.05555555556 |  | 0.7          | #DIV/0! |
| ROPN1B  | 0.04761904762 | 0.04761904762 | 0.05555555556 |  | 0.7          | #DIV/0! |
| ROPN1L  | 0.04761904762 | 0.04761904762 | 0.05555555556 |  | 0.7          | #DIV/0! |
| PN1L-A  | 0.04761904762 | 0.04761904762 | 0.05555555556 |  | 0.7          | #DIV/0! |
| ROR1    | 0.04761904762 | 0.04761904762 | 0.05555555556 |  | 0.7          | #DIV/0! |
| ORI-AS  | 0.04761904762 | 0.04761904762 | 0.05555555556 |  | 0.7          | #DIV/0! |
| ROR2    | 0.04761904762 | 0.04761904762 | 0.05555555556 |  | 0.7          | #DIV/0! |
| RORA    | 0.04761904762 | 0.04761904762 | 0.05555555556 |  | 0.7          | #DIV/0! |
| ORA-AS  | 0.04761904762 | 0.04761904762 | 0.05555555556 |  | 0.7          | #DIV/0! |

|                |               |               |               |  |              |         |
|----------------|---------------|---------------|---------------|--|--------------|---------|
| <b>ORA-AS</b>  | 0.04761904762 | 0.04761904762 | 0.05555555556 |  | 0.7          | #DIV/0! |
| <b>RORB</b>    | 0             | 0             | 0.05555555556 |  | 0            | #DIV/0! |
| <b>ORB-AS</b>  | 0             | 0             | 0.05555555556 |  | 0            | #DIV/0! |
| <b>RORC</b>    | 0.1904761905  | 0.1904761905  | 0             |  | inf          | #DIV/0! |
| <b>RP1</b>     | 0.1428571429  | 0.1428571429  | 0.1111111111  |  | 1.083333333  | #DIV/0! |
| <b>RP1L1</b>   | 0.09523809524 | 0.09523809524 | 0.1111111111  |  | 0.6842105263 | #DIV/0! |
| <b>RP9</b>     | 0.04761904762 | 0.04761904762 | 0.1666666667  |  | 0.2          | #DIV/0! |
| <b>RP9P</b>    | 0.04761904762 | 0.04761904762 | 0.1666666667  |  | 0.2          | #DIV/0! |
| <b>RPA1</b>    | 0             | 0             | 0.1111111111  |  | 0            | #DIV/0! |
| <b>RPA2</b>    | 0.04761904762 | 0.04761904762 | 0.1111111111  |  | 0.325        | #DIV/0! |
| <b>RPA3</b>    | 0.04761904762 | 0.04761904762 | 0.1666666667  |  | 0.2          | #DIV/0! |
| <b>RPAIN</b>   | 0             | 0             | 0.05555555556 |  | 0            | #DIV/0! |
| <b>RPAP2</b>   | 0.04761904762 | 0.04761904762 | 0.05555555556 |  | 0.7          | #DIV/0! |
| <b>RPAP3</b>   | 0.04761904762 | 0.04761904762 | 0.05555555556 |  | 0.7          | #DIV/0! |
| <b>PARP-AS</b> | 0.1428571429  | 0.1428571429  | 0.05555555556 |  | 2.333333333  | #DIV/0! |
| <b>RPE</b>     | 0             | 0             | 0.05555555556 |  | 0            | #DIV/0! |
| <b>RPE65</b>   | 0.04761904762 | 0.04761904762 | 0.05555555556 |  | 0.7          | #DIV/0! |
| <b>RPEL1</b>   | 0.1428571429  | 0.1428571429  | 0.05555555556 |  | 2.333333333  | #DIV/0! |
| <b>RPF1</b>    | 0.04761904762 | 0.04761904762 | 0.05555555556 |  | 0.7          | #DIV/0! |
| <b>RPF2</b>    | 0             | 0             | 0             |  |              | #DIV/0! |
| <b>PGRIP1</b>  | 0.04761904762 | 0.04761904762 | 0.05555555556 |  | 0.7          | #DIV/0! |
| <b>RPH3A</b>   | 0             | 0             | 0.05555555556 |  | 0            | #DIV/0! |
| <b>RPH3AL</b>  | 0             | 0             | 0.1111111111  |  | 0            | #DIV/0! |
| <b>RPIA</b>    | 0             | 0             | 0.05555555556 |  | 0            | #DIV/0! |
| <b>RPL10A</b>  | 0.04761904762 | 0.04761904762 | 0.05555555556 |  | 0.7          | #DIV/0! |
| <b>RPL10L</b>  | 0.04761904762 | 0.04761904762 | 0             |  | inf          | #DIV/0! |
| <b>RPL11</b>   | 0.04761904762 | 0.04761904762 | 0.1111111111  |  | 0.325        | #DIV/0! |
| <b>RPL12</b>   | 0.09523809524 | 0.09523809524 | 0.05555555556 |  | 1.473684211  | #DIV/0! |
| <b>RPL13</b>   | 0.09523809524 | 0.09523809524 | 0             |  | inf          | #DIV/0! |
| <b>RPL13A</b>  | 0.09523809524 | 0.09523809524 | 0.1111111111  |  | 0.6842105263 | #DIV/0! |
| <b>PL13AP</b>  | 0.04761904762 | 0.04761904762 | 0.1111111111  |  | 0.325        | #DIV/0! |
| <b>PL13AP2</b> | 0.04761904762 | 0.04761904762 | 0.05555555556 |  | 0.7          | #DIV/0! |
| <b>PL13AP3</b> | 0.04761904762 | 0.04761904762 | 0             |  | inf          | #DIV/0! |
| <b>PL13AP4</b> | 0.1428571429  | 0.1428571429  | 0             |  | inf          | #DIV/0! |
| <b>PL13AP5</b> | 0.1428571429  | 0.1428571429  | 0.05555555556 |  | 2.333333333  | #DIV/0! |
| <b>RPL13P5</b> | 0.04761904762 | 0.04761904762 | 0.1111111111  |  | 0.325        | #DIV/0! |
| <b>RPL14</b>   | 0.04761904762 | 0.04761904762 | 0             |  | inf          | #DIV/0! |
| <b>RPL15</b>   | 0.04761904762 | 0.04761904762 | 0             |  | inf          | #DIV/0! |
| <b>RPL17</b>   | 0.04761904762 | 0.04761904762 | 0             |  | inf          | #DIV/0! |
| <b>17-C18c</b> | 0.04761904762 | 0.04761904762 | 0             |  | inf          | #DIV/0! |
| <b>RPL18</b>   | 0.09523809524 | 0.09523809524 | 0.1111111111  |  | 0.6842105263 | #DIV/0! |
| <b>RPL18A</b>  | 0.1428571429  | 0.1428571429  | 0.1111111111  |  | 1.083333333  | #DIV/0! |
| <b>RPL19</b>   | 0.09523809524 | 0.09523809524 | 0             |  | inf          | #DIV/0! |
| <b>PL19P1</b>  | 0.04761904762 | 0.04761904762 | 0.05555555556 |  | 0.7          | #DIV/0! |
| <b>RPL21</b>   | 0.2380952381  | 0.2380952381  | 0             |  | inf          | #DIV/0! |
| <b>PL21P2</b>  | 0.1428571429  | 0.1428571429  | 0             |  | inf          | #DIV/0! |
| <b>PL21P4</b>  | 0.2380952381  | 0.2380952381  | 0.05555555556 |  | 4.375        | #DIV/0! |
| <b>RPL22</b>   | 0             | 0             | 0.05555555556 |  | 0            | #DIV/0! |
| <b>RPL22L1</b> | 0.1904761905  | 0.1904761905  | 0.05555555556 |  | 3.294117647  | #DIV/0! |
| <b>RPL23</b>   | 0.09523809524 | 0.09523809524 | 0             |  | inf          | #DIV/0! |
| <b>RPL23A</b>  | 0.04761904762 | 0.04761904762 | 0.05555555556 |  | 0.7          | #DIV/0! |

|         |               |               |               |  |              |         |
|---------|---------------|---------------|---------------|--|--------------|---------|
| PL23AP0 | 0.04761904762 | 0.04761904762 | 0.05555555556 |  | 0.7          | #DIV/0! |
| PL23AP0 | 0.09523809524 | 0.09523809524 | 0.11111111111 |  | 0.6842105263 | #DIV/0! |
| PL23AP  | 0             | 0             | 0.05555555556 |  | 0            | #DIV/0! |
| PL23AP  | 0             | 0             | 0.11111111111 |  | 0            | #DIV/0! |
| RPL23P8 | 0.04761904762 | 0.04761904762 | 0.16666666667 |  | 0.2          | #DIV/0! |
| RPL24   | 0.09523809524 | 0.09523809524 | 0.05555555556 |  | 1.473684211  | #DIV/0! |
| RPL26   | 0.04761904762 | 0.04761904762 | 0.05555555556 |  | 0.7          | #DIV/0! |
| RPL26L1 | 0             | 0             | 0.05555555556 |  | 0            | #DIV/0! |
| RPL27   | 0.04761904762 | 0.04761904762 | 0             |  | inf          | #DIV/0! |
| RPL28   | 0.09523809524 | 0.09523809524 | 0.05555555556 |  | 1.473684211  | #DIV/0! |
| RPL29   | 0.04761904762 | 0.04761904762 | 0             |  | inf          | #DIV/0! |
| RPL29P2 | 0             | 0             | 0.05555555556 |  | 0            | #DIV/0! |
| RPL3    | 0             | 0             | 0.11111111111 |  | 0            | #DIV/0! |
| RPL30   | 0.1904761905  | 0.1904761905  | 0.11111111111 |  | 1.529411765  | #DIV/0! |
| RPL31   | 0             | 0             | 0.05555555556 |  | 0            | #DIV/0! |
| PL31P1  | 0.1428571429  | 0.1428571429  | 0             |  | inf          | #DIV/0! |
| RPL32   | 0.04761904762 | 0.04761904762 | 0             |  | inf          | #DIV/0! |
| RPL32P3 | 0.09523809524 | 0.09523809524 | 0.05555555556 |  | 1.473684211  | #DIV/0! |
| RPL34   | 0             | 0             | 0.05555555556 |  | 0            | #DIV/0! |
| PL34-AS | 0             | 0             | 0.05555555556 |  | 0            | #DIV/0! |
| RPL35   | 0.09523809524 | 0.09523809524 | 0.05555555556 |  | 1.473684211  | #DIV/0! |
| RPL35A  | 0.1428571429  | 0.1428571429  | 0.05555555556 |  | 2.333333333  | #DIV/0! |
| RPL36   | 0.1428571429  | 0.1428571429  | 0.05555555556 |  | 2.333333333  | #DIV/0! |
| RPL36A1 | 0.04761904762 | 0.04761904762 | 0             |  | inf          | #DIV/0! |
| RPL37   | 0.04761904762 | 0.04761904762 | 0.05555555556 |  | 0.7          | #DIV/0! |
| RPL37A  | 0             | 0             | 0.05555555556 |  | 0            | #DIV/0! |
| RPL38   | 0.04761904762 | 0.04761904762 | 0             |  | inf          | #DIV/0! |
| RPL39L  | 0.09523809524 | 0.09523809524 | 0.05555555556 |  | 1.473684211  | #DIV/0! |
| RPL3L   | 0.09523809524 | 0.09523809524 | 0.22222222222 |  | 0.2894736842 | #DIV/0! |
| RPL4    | 0.04761904762 | 0.04761904762 | 0.05555555556 |  | 0.7          | #DIV/0! |
| RPL41   | 0.09523809524 | 0.09523809524 | 0.05555555556 |  | 1.473684211  | #DIV/0! |
| RPL5    | 0.04761904762 | 0.04761904762 | 0.05555555556 |  | 0.7          | #DIV/0! |
| RPL6    | 0             | 0             | 0.11111111111 |  | 0            | #DIV/0! |
| RPL7    | 0.1904761905  | 0.1904761905  | 0.16666666667 |  | 0.9411764706 | #DIV/0! |
| RPL7A   | 0.04761904762 | 0.04761904762 | 0             |  | inf          | #DIV/0! |
| RPL7L1  | 0.04761904762 | 0.04761904762 | 0.05555555556 |  | 0.7          | #DIV/0! |
| RPL8    | 0.09523809524 | 0.09523809524 | 0.22222222222 |  | 0.2894736842 | #DIV/0! |
| RPL9    | 0.1904761905  | 0.1904761905  | 0.05555555556 |  | 3.294117647  | #DIV/0! |
| RPLP0   | 0             | 0             | 0.11111111111 |  | 0            | #DIV/0! |
| RPLP1   | 0.04761904762 | 0.04761904762 | 0.05555555556 |  | 0.7          | #DIV/0! |
| RPLP2   | 0.04761904762 | 0.04761904762 | 0             |  | inf          | #DIV/0! |
| RPN1    | 0.09523809524 | 0.09523809524 | 0.05555555556 |  | 1.473684211  | #DIV/0! |
| RPN2    | 0.09523809524 | 0.09523809524 | 0.16666666667 |  | 0.4210526316 | #DIV/0! |
| RPP14   | 0.04761904762 | 0.04761904762 | 0             |  | inf          | #DIV/0! |
| RPP25   | 0.04761904762 | 0.04761904762 | 0.05555555556 |  | 0.7          | #DIV/0! |
| RPP25L  | 0.09523809524 | 0.09523809524 | 0.05555555556 |  | 1.473684211  | #DIV/0! |
| RPP30   | 0.1428571429  | 0.1428571429  | 0.11111111111 |  | 1.083333333  | #DIV/0! |
| RPP38   | 0.09523809524 | 0.09523809524 | 0.11111111111 |  | 0.6842105263 | #DIV/0! |
| PP38-D  | 0.09523809524 | 0.09523809524 | 0.11111111111 |  | 0.6842105263 | #DIV/0! |
| RPPH1   | 0.04761904762 | 0.04761904762 | 0             |  | inf          | #DIV/0! |
| RPRD1A  | 0.04761904762 | 0.04761904762 | 0             |  | inf          | #DIV/0! |

|          |               |               |              |  |              |         |
|----------|---------------|---------------|--------------|--|--------------|---------|
| RPRD1E   | 0.1428571429  | 0.1428571429  | 0.1666666667 |  | 0.6666666667 | #DIV/0! |
| RPRD2    | 0.1904761905  | 0.1904761905  | 0.0555555556 |  | 3.294117647  | #DIV/0! |
| RPRM     | 0             | 0             | 0.0555555556 |  | 0            | #DIV/0! |
| RPRML    | 0.1428571429  | 0.1428571429  | 0            |  | inf          | #DIV/0! |
| RPS10    | 0.04761904762 | 0.04761904762 | 0            |  | inf          | #DIV/0! |
| S10-NU10 | 0.04761904762 | 0.04761904762 | 0            |  | inf          | #DIV/0! |
| RPS10P7  | 0.1428571429  | 0.1428571429  | 0            |  | inf          | #DIV/0! |
| RPS11    | 0.09523809524 | 0.09523809524 | 0.1111111111 |  | 0.6842105263 | #DIV/0! |
| RPS14P3  | 0.04761904762 | 0.04761904762 | 0.1111111111 |  | 0.325        | #DIV/0! |
| RPS15    | 0.09523809524 | 0.09523809524 | 0.1111111111 |  | 0.6842105263 | #DIV/0! |
| RPS15A0  | 0.09523809524 | 0.09523809524 | 0            |  | inf          | #DIV/0! |
| PS15AP0  | 0.04761904762 | 0.04761904762 | 0.0555555556 |  | 0.7          | #DIV/0! |
| RPS16    | 0.04761904762 | 0.04761904762 | 0.0555555556 |  | 0.7          | #DIV/0! |
| RPS16P5  | 0.04761904762 | 0.04761904762 | 0            |  | inf          | #DIV/0! |
| RPS17    | 0.04761904762 | 0.04761904762 | 0.0555555556 |  | 0.7          | #DIV/0! |
| RPS18P9  | 0             | 0             | 0            |  |              | #DIV/0! |
| RPS19    | 0.04761904762 | 0.04761904762 | 0.0555555556 |  | 0.7          | #DIV/0! |
| PS19BP   | 0             | 0             | 0.1111111111 |  | 0            | #DIV/0! |
| RPS2     | 0.09523809524 | 0.09523809524 | 0.2222222222 |  | 0.2894736842 | #DIV/0! |
| RPS20    | 0.1428571429  | 0.1428571429  | 0.1111111111 |  | 1.083333333  | #DIV/0! |
| RPS21    | 0.1428571429  | 0.1428571429  | 0.2222222222 |  | 0.4583333333 | #DIV/0! |
| RPS23    | 0.04761904762 | 0.04761904762 | 0.0555555556 |  | 0.7          | #DIV/0! |
| RPS24    | 0.1428571429  | 0.1428571429  | 0.0555555556 |  | 2.333333333  | #DIV/0! |
| RPS26    | 0.09523809524 | 0.09523809524 | 0.0555555556 |  | 1.473684211  | #DIV/0! |
| RPS27    | 0.1904761905  | 0.1904761905  | 0.0555555556 |  | 3.294117647  | #DIV/0! |
| RPS27A0  | 0.04761904762 | 0.04761904762 | 0.0555555556 |  | 0.7          | #DIV/0! |
| RPS27L0  | 0.04761904762 | 0.04761904762 | 0.0555555556 |  | 0.7          | #DIV/0! |
| RPS28    | 0.1428571429  | 0.1428571429  | 0.0555555556 |  | 2.333333333  | #DIV/0! |
| RPS29    | 0.04761904762 | 0.04761904762 | 0            |  | inf          | #DIV/0! |
| RPS2P32  | 0.04761904762 | 0.04761904762 | 0.1666666667 |  | 0.2          | #DIV/0! |
| RPS3A    | 0             | 0             | 0.0555555556 |  | 0            | #DIV/0! |
| RPS5     | 0.1428571429  | 0.1428571429  | 0.0555555556 |  | 2.333333333  | #DIV/0! |
| RPS6     | 0.04761904762 | 0.04761904762 | 0.0555555556 |  | 0.7          | #DIV/0! |
| RPS6KA   | 0.04761904762 | 0.04761904762 | 0.1111111111 |  | 0.325        | #DIV/0! |
| RPS6KB   | 0.1428571429  | 0.1428571429  | 0            |  | inf          | #DIV/0! |
| RPS6KC   | 0.1428571429  | 0.1428571429  | 0            |  | inf          | #DIV/0! |
| RPS7     | 0             | 0             | 0.0555555556 |  | 0            | #DIV/0! |
| RPS7P5   | 0.1428571429  | 0.1428571429  | 0            |  | inf          | #DIV/0! |
| RPS8     | 0.04761904762 | 0.04761904762 | 0.0555555556 |  | 0.7          | #DIV/0! |
| RPS9     | 0.09523809524 | 0.09523809524 | 0.0555555556 |  | 1.473684211  | #DIV/0! |
| RPSA     | 0.04761904762 | 0.04761904762 | 0            |  | inf          | #DIV/0! |
| RPSAP50  | 0.09523809524 | 0.09523809524 | 0.0555555556 |  | 1.473684211  | #DIV/0! |
| RPSAP50  | 0.09523809524 | 0.09523809524 | 0            |  | inf          | #DIV/0! |
| RPSAP9   | 0             | 0             | 0.0555555556 |  | 0            | #DIV/0! |
| RPTN     | 0.1904761905  | 0.1904761905  | 0            |  | inf          | #DIV/0! |
| RPTOR    | 0.04761904762 | 0.04761904762 | 0            |  | inf          | #DIV/0! |
| RPUSD10  | 0.04761904762 | 0.04761904762 | 0.2222222222 |  | 0.1375       | #DIV/0! |
| RPUSD30  | 0.09523809524 | 0.09523809524 | 0            |  | inf          | #DIV/0! |
| RRAD     | 0.09523809524 | 0.09523809524 | 0.0555555556 |  | 1.473684211  | #DIV/0! |
| RRAGA0   | 0.04761904762 | 0.04761904762 | 0.0555555556 |  | 0.7          | #DIV/0! |
| RRAGC0   | 0.04761904762 | 0.04761904762 | 0.0555555556 |  | 0.7          | #DIV/0! |

|          |               |               |              |  |              |         |
|----------|---------------|---------------|--------------|--|--------------|---------|
| RRAS     | 0.09523809524 | 0.09523809524 | 0.1111111111 |  | 0.6842105263 | #DIV/0! |
| RRBP1    | 0.1904761905  | 0.1904761905  | 0.1111111111 |  | 1.529411765  | #DIV/0! |
| RRH      | 0             | 0             | 0.0555555556 |  | 0            | #DIV/0! |
| RRM1     | 0.04761904762 | 0.04761904762 | 0            |  | inf          | #DIV/0! |
| RRM2     | 0             | 0             | 0.0555555556 |  | 0            | #DIV/0! |
| RRM2B    | 0.1904761905  | 0.1904761905  | 0.1111111111 |  | 1.529411765  | #DIV/0! |
| RRN3     | 0.04761904762 | 0.04761904762 | 0            |  | inf          | #DIV/0! |
| RRN3P1   | 0.04761904762 | 0.04761904762 | 0            |  | inf          | #DIV/0! |
| RRN3P2   | 0.04761904762 | 0.04761904762 | 0            |  | inf          | #DIV/0! |
| RRN3P3   | 0.04761904762 | 0.04761904762 | 0            |  | inf          | #DIV/0! |
| RRNAD1   | 0.1428571429  | 0.1428571429  | 0.1111111111 |  | 1.083333333  | #DIV/0! |
| RRP1     | 0.04761904762 | 0.04761904762 | 0.1111111111 |  | 0.325        | #DIV/0! |
| RRP12    | 0.1428571429  | 0.1428571429  | 0            |  | inf          | #DIV/0! |
| RRP15    | 0.1428571429  | 0.1428571429  | 0.0555555556 |  | 2.333333333  | #DIV/0! |
| RRP1B    | 0.04761904762 | 0.04761904762 | 0.1666666667 |  | 0.2          | #DIV/0! |
| RRP36    | 0.04761904762 | 0.04761904762 | 0.0555555556 |  | 0.7          | #DIV/0! |
| RRP7A    | 0             | 0             | 0.1666666667 |  | 0            | #DIV/0! |
| RRP7BP   | 0             | 0             | 0.1666666667 |  | 0            | #DIV/0! |
| RRP8     | 0.04761904762 | 0.04761904762 | 0            |  | inf          | #DIV/0! |
| RRP9     | 0.04761904762 | 0.04761904762 | 0            |  | inf          | #DIV/0! |
| RRS1     | 0.1428571429  | 0.1428571429  | 0.1666666667 |  | 0.6666666667 | #DIV/0! |
| RS1-AS   | 0.1428571429  | 0.1428571429  | 0.1666666667 |  | 0.6666666667 | #DIV/0! |
| RSAD1    | 0.09523809524 | 0.09523809524 | 0            |  | inf          | #DIV/0! |
| RSAD2    | 0             | 0             | 0.0555555556 |  | 0            | #DIV/0! |
| RSBN1    | 0.04761904762 | 0.04761904762 | 0.0555555556 |  | 0.7          | #DIV/0! |
| RSBN1L   | 0.04761904762 | 0.04761904762 | 0.1111111111 |  | 0.325        | #DIV/0! |
| RSC1A10  | 0.04761904762 | 0.04761904762 | 0.1111111111 |  | 0.325        | #DIV/0! |
| RSKR     | 0.04761904762 | 0.04761904762 | 0.0555555556 |  | 0.7          | #DIV/0! |
| RSL1D10  | 0.04761904762 | 0.04761904762 | 0            |  | inf          | #DIV/0! |
| RSL24D10 | 0.04761904762 | 0.04761904762 | 0.0555555556 |  | 0.7          | #DIV/0! |
| RSPH1    | 0.04761904762 | 0.04761904762 | 0.1111111111 |  | 0.325        | #DIV/0! |
| RSPH10I  | 0.04761904762 | 0.04761904762 | 0.1666666667 |  | 0.2          | #DIV/0! |
| SPH10B   | 0.04761904762 | 0.04761904762 | 0.1666666667 |  | 0.2          | #DIV/0! |
| RSPH14   | 0             | 0             | 0.0555555556 |  | 0            | #DIV/0! |
| RSPH6A   | 0.09523809524 | 0.09523809524 | 0.1111111111 |  | 0.6842105263 | #DIV/0! |
| RSPH9    | 0.04761904762 | 0.04761904762 | 0.0555555556 |  | 0.7          | #DIV/0! |
| RSP01    | 0.04761904762 | 0.04761904762 | 0.0555555556 |  | 0.7          | #DIV/0! |
| RSP02    | 0.1904761905  | 0.1904761905  | 0.1111111111 |  | 1.529411765  | #DIV/0! |
| RSP04    | 0.1904761905  | 0.1904761905  | 0.1111111111 |  | 1.529411765  | #DIV/0! |
| RSPRY10  | 0.04761904762 | 0.04761904762 | 0            |  | inf          | #DIV/0! |
| RSRC1    | 0.1428571429  | 0.1428571429  | 0.0555555556 |  | 2.333333333  | #DIV/0! |
| RSRC2    | 0.04761904762 | 0.04761904762 | 0.1111111111 |  | 0.325        | #DIV/0! |
| RSRP1    | 0.04761904762 | 0.04761904762 | 0.1111111111 |  | 0.325        | #DIV/0! |
| RSU1     | 0.09523809524 | 0.09523809524 | 0.1111111111 |  | 0.6842105263 | #DIV/0! |
| RSU1P2   | 0.1428571429  | 0.1428571429  | 0.0555555556 |  | 2.333333333  | #DIV/0! |
| RTBDN    | 0.1428571429  | 0.1428571429  | 0.1111111111 |  | 1.083333333  | #DIV/0! |
| RTCA     | 0.04761904762 | 0.04761904762 | 0.0555555556 |  | 0.7          | #DIV/0! |
| TCA-AS   | 0.04761904762 | 0.04761904762 | 0.0555555556 |  | 0.7          | #DIV/0! |
| RTCB     | 0.04761904762 | 0.04761904762 | 0.1111111111 |  | 0.325        | #DIV/0! |
| RTEL1    | 0.1428571429  | 0.1428571429  | 0.2222222222 |  | 0.4583333333 | #DIV/0! |
| 1-TNFR   | 0.1428571429  | 0.1428571429  | 0.2222222222 |  | 0.4583333333 | #DIV/0! |

|         |               |               |              |  |              |         |
|---------|---------------|---------------|--------------|--|--------------|---------|
| RTF2    | 0.09523809524 | 0.09523809524 | 0.1666666667 |  | 0.4210526316 | #DIV/0! |
| RTKN    | 0             | 0             | 0.0555555556 |  | 0            | #DIV/0! |
| RTKN2   | 0.04761904762 | 0.04761904762 | 0.1666666667 |  | 0.2          | #DIV/0! |
| RTL10   | 0.04761904762 | 0.04761904762 | 0.0555555556 |  | 0.7          | #DIV/0! |
| RTL6    | 0             | 0             | 0.1666666667 |  | 0            | #DIV/0! |
| RTN2    | 0.09523809524 | 0.09523809524 | 0.1111111111 |  | 0.6842105263 | #DIV/0! |
| RTN4    | 0.04761904762 | 0.04761904762 | 0.0555555556 |  | 0.7          | #DIV/0! |
| RTN4IP1 | 0             | 0             | 0            |  |              | #DIV/0! |
| RTN4R   | 0.04761904762 | 0.04761904762 | 0.0555555556 |  | 0.7          | #DIV/0! |
| RTN4RL  | 0             | 0             | 0.1111111111 |  | 0            | #DIV/0! |
| RTP1    | 0.09523809524 | 0.09523809524 | 0.0555555556 |  | 1.473684211  | #DIV/0! |
| RTP2    | 0.09523809524 | 0.09523809524 | 0.1111111111 |  | 0.6842105263 | #DIV/0! |
| RTP4    | 0.09523809524 | 0.09523809524 | 0.0555555556 |  | 1.473684211  | #DIV/0! |
| RTP5    | 0             | 0             | 0.0555555556 |  | 0            | #DIV/0! |
| RTRAF   | 0.04761904762 | 0.04761904762 | 0            |  | inf          | #DIV/0! |
| RUBCN   | 0.1428571429  | 0.1428571429  | 0.0555555556 |  | 2.333333333  | #DIV/0! |
| RUFY1   | 0.09523809524 | 0.09523809524 | 0.0555555556 |  | 1.473684211  | #DIV/0! |
| RUFY2   | 0.1904761905  | 0.1904761905  | 0.0555555556 |  | 3.294117647  | #DIV/0! |
| RUFY3   | 0.09523809524 | 0.09523809524 | 0.0555555556 |  | 1.473684211  | #DIV/0! |
| RUFY4   | 0             | 0             | 0.1111111111 |  | 0            | #DIV/0! |
| RUNDC1  | 0.04761904762 | 0.04761904762 | 0            |  | inf          | #DIV/0! |
| UNDC3   | 0.09523809524 | 0.09523809524 | 0            |  | inf          | #DIV/0! |
| UNDC3A- | 0.09523809524 | 0.09523809524 | 0            |  | inf          | #DIV/0! |
| UNDC3   | 0.09523809524 | 0.09523809524 | 0.0555555556 |  | 1.473684211  | #DIV/0! |
| RUNX1   | 0.04761904762 | 0.04761904762 | 0.1666666667 |  | 0.2          | #DIV/0! |
| UNX1-IT | 0.04761904762 | 0.04761904762 | 0.1666666667 |  | 0.2          | #DIV/0! |
| UNX1T   | 0.1904761905  | 0.1904761905  | 0.1111111111 |  | 1.529411765  | #DIV/0! |
| RUNX2   | 0.04761904762 | 0.04761904762 | 0.1111111111 |  | 0.325        | #DIV/0! |
| RUNX3   | 0.04761904762 | 0.04761904762 | 0.1111111111 |  | 0.325        | #DIV/0! |
| RUSC1   | 0.1904761905  | 0.1904761905  | 0.1111111111 |  | 1.529411765  | #DIV/0! |
| USC1-A  | 0.1904761905  | 0.1904761905  | 0.1111111111 |  | 1.529411765  | #DIV/0! |
| RUSC2   | 0.09523809524 | 0.09523809524 | 0.0555555556 |  | 1.473684211  | #DIV/0! |
| RUVBL1  | 0.09523809524 | 0.09523809524 | 0.0555555556 |  | 1.473684211  | #DIV/0! |
| VBL1-A  | 0.09523809524 | 0.09523809524 | 0.0555555556 |  | 1.473684211  | #DIV/0! |
| RUVBL2  | 0.09523809524 | 0.09523809524 | 0.1111111111 |  | 0.6842105263 | #DIV/0! |
| RWDD2   | 0.04761904762 | 0.04761904762 | 0.1111111111 |  | 0.325        | #DIV/0! |
| RWDD3   | 0.04761904762 | 0.04761904762 | 0.0555555556 |  | 0.7          | #DIV/0! |
| RWDD4   | 0             | 0             | 0.0555555556 |  | 0            | #DIV/0! |
| RXFP1   | 0             | 0             | 0.0555555556 |  | 0            | #DIV/0! |
| RXFP3   | 0.04761904762 | 0.04761904762 | 0.1111111111 |  | 0.325        | #DIV/0! |
| RXFP4   | 0.1428571429  | 0.1428571429  | 0.1111111111 |  | 1.083333333  | #DIV/0! |
| RXRA    | 0.04761904762 | 0.04761904762 | 0            |  | inf          | #DIV/0! |
| RXRB    | 0.04761904762 | 0.04761904762 | 0            |  | inf          | #DIV/0! |
| RXRG    | 0.1428571429  | 0.1428571429  | 0            |  | inf          | #DIV/0! |
| RXYLT1  | 0.1428571429  | 0.1428571429  | 0.0555555556 |  | 2.333333333  | #DIV/0! |
| YLT1-A  | 0.1428571429  | 0.1428571429  | 0.0555555556 |  | 2.333333333  | #DIV/0! |
| RYBP    | 0.04761904762 | 0.04761904762 | 0            |  | inf          | #DIV/0! |
| RYK     | 0.1428571429  | 0.1428571429  | 0.0555555556 |  | 2.333333333  | #DIV/0! |
| RYR1    | 0.04761904762 | 0.04761904762 | 0.0555555556 |  | 0.7          | #DIV/0! |
| RYR2    | 0.1428571429  | 0.1428571429  | 0            |  | inf          | #DIV/0! |
| S100A1  | 0.1904761905  | 0.1904761905  | 0.0555555556 |  | 3.294117647  | #DIV/0! |

|         |               |               |               |  |              |         |
|---------|---------------|---------------|---------------|--|--------------|---------|
| S100A10 | 0.1904761905  | 0.1904761905  | 0             |  | inf          | #DIV/0! |
| S100A11 | 0.1904761905  | 0.1904761905  | 0             |  | inf          | #DIV/0! |
| S100A13 | 0.1904761905  | 0.1904761905  | 0.05555555556 |  | 3.294117647  | #DIV/0! |
| S100A14 | 0.1904761905  | 0.1904761905  | 0.05555555556 |  | 3.294117647  | #DIV/0! |
| S100A16 | 0.1904761905  | 0.1904761905  | 0.05555555556 |  | 3.294117647  | #DIV/0! |
| S100A2  | 0.1904761905  | 0.1904761905  | 0.05555555556 |  | 3.294117647  | #DIV/0! |
| S100A3  | 0.1904761905  | 0.1904761905  | 0.05555555556 |  | 3.294117647  | #DIV/0! |
| S100A4  | 0.1904761905  | 0.1904761905  | 0.05555555556 |  | 3.294117647  | #DIV/0! |
| S100A5  | 0.1904761905  | 0.1904761905  | 0.05555555556 |  | 3.294117647  | #DIV/0! |
| S100A6  | 0.1904761905  | 0.1904761905  | 0             |  | inf          | #DIV/0! |
| S100A7  | 0.1904761905  | 0.1904761905  | 0             |  | inf          | #DIV/0! |
| S100B   | 0.04761904762 | 0.04761904762 | 0.1111111111  |  | 0.325        | #DIV/0! |
| S100PB  | 0.04761904762 | 0.04761904762 | 0.1111111111  |  | 0.325        | #DIV/0! |
| S100Z   | 0.04761904762 | 0.04761904762 | 0             |  | inf          | #DIV/0! |
| S1PR1   | 0.04761904762 | 0.04761904762 | 0.05555555556 |  | 0.7          | #DIV/0! |
| S1PR2   | 0.1428571429  | 0.1428571429  | 0.1111111111  |  | 1.083333333  | #DIV/0! |
| S1PR3   | 0             | 0             | 0.05555555556 |  | 0            | #DIV/0! |
| S1PR4   | 0.09523809524 | 0.09523809524 | 0.05555555556 |  | 1.473684211  | #DIV/0! |
| S1PR5   | 0.1428571429  | 0.1428571429  | 0.1111111111  |  | 1.083333333  | #DIV/0! |
| SAE1    | 0.09523809524 | 0.09523809524 | 0.1111111111  |  | 0.6842105263 | #DIV/0! |
| SAFB    | 0.1428571429  | 0.1428571429  | 0.05555555556 |  | 2.333333333  | #DIV/0! |
| SAFB2   | 0.1428571429  | 0.1428571429  | 0.05555555556 |  | 2.333333333  | #DIV/0! |
| SAG     | 0             | 0             | 0.05555555556 |  | 0            | #DIV/0! |
| SALL1   | 0.04761904762 | 0.04761904762 | 0             |  | inf          | #DIV/0! |
| SALL3   | 0.04761904762 | 0.04761904762 | 0.05555555556 |  | 0.7          | #DIV/0! |
| SALL4   | 0.09523809524 | 0.09523809524 | 0.1111111111  |  | 0.6842105263 | #DIV/0! |
| ALRNA0  | 0.04761904762 | 0.04761904762 | 0.05555555556 |  | 0.7          | #DIV/0! |
| ALRNA0  | 0.04761904762 | 0.04761904762 | 0.05555555556 |  | 0.7          | #DIV/0! |
| SAMD1   | 0.1428571429  | 0.1428571429  | 0.1111111111  |  | 1.083333333  | #DIV/0! |
| SAMD10  | 0.1428571429  | 0.1428571429  | 0.2222222222  |  | 0.4583333333 | #DIV/0! |
| SAMD11  | 0             | 0             | 0.1111111111  |  | 0            | #DIV/0! |
| SAMD12  | 0.1428571429  | 0.1428571429  | 0.1666666667  |  | 0.6666666667 | #DIV/0! |
| MD12-A  | 0.09523809524 | 0.09523809524 | 0.1666666667  |  | 0.4210526316 | #DIV/0! |
| SAMD13  | 0.04761904762 | 0.04761904762 | 0.05555555556 |  | 0.7          | #DIV/0! |
| SAMD14  | 0.09523809524 | 0.09523809524 | 0             |  | inf          | #DIV/0! |
| SAMD4A  | 0.04761904762 | 0.04761904762 | 0             |  | inf          | #DIV/0! |
| SAMD4B  | 0.04761904762 | 0.04761904762 | 0.05555555556 |  | 0.7          | #DIV/0! |
| SAMD7   | 0.1904761905  | 0.1904761905  | 0.05555555556 |  | 3.294117647  | #DIV/0! |
| SAMD8   | 0.1904761905  | 0.1904761905  | 0.05555555556 |  | 3.294117647  | #DIV/0! |
| SAMD9   | 0.04761904762 | 0.04761904762 | 0.1111111111  |  | 0.325        | #DIV/0! |
| SAMD91  | 0.04761904762 | 0.04761904762 | 0.1111111111  |  | 0.325        | #DIV/0! |
| SAMHD   | 0.09523809524 | 0.09523809524 | 0.1111111111  |  | 0.6842105263 | #DIV/0! |
| SAMM50  | 0             | 0             | 0.1666666667  |  | 0            | #DIV/0! |
| AMMSO   | 0.04761904762 | 0.04761904762 | 0             |  | inf          | #DIV/0! |
| SAMSN1  | 0.04761904762 | 0.04761904762 | 0.1111111111  |  | 0.325        | #DIV/0! |
| MSN1-A  | 0.04761904762 | 0.04761904762 | 0.1111111111  |  | 0.325        | #DIV/0! |
| SAP130  | 0             | 0             | 0.05555555556 |  | 0            | #DIV/0! |
| SAP18   | 0.04761904762 | 0.04761904762 | 0             |  | inf          | #DIV/0! |
| SAP25   | 0.04761904762 | 0.04761904762 | 0.05555555556 |  | 0.7          | #DIV/0! |
| SAP30   | 0             | 0             | 0.05555555556 |  | 0            | #DIV/0! |
| SAP30B  | 0.04761904762 | 0.04761904762 | 0.05555555556 |  | 0.7          | #DIV/0! |

|         |               |               |               |  |              |         |
|---------|---------------|---------------|---------------|--|--------------|---------|
| SAPCD1  | 0.04761904762 | 0.04761904762 | 0             |  | inf          | #DIV/0! |
| PCD1-A  | 0.04761904762 | 0.04761904762 | 0             |  | inf          | #DIV/0! |
| SAPCD2  | 0.1428571429  | 0.1428571429  | 0.05555555556 |  | 2.333333333  | #DIV/0! |
| SARIA   | 0.09523809524 | 0.09523809524 | 0             |  | inf          | #DIV/0! |
| SAR1B   | 0.04761904762 | 0.04761904762 | 0             |  | inf          | #DIV/0! |
| SARAF   | 0.04761904762 | 0.04761904762 | 0.1111111111  |  | 0.325        | #DIV/0! |
| SARDH   | 0.04761904762 | 0.04761904762 | 0             |  | inf          | #DIV/0! |
| SARM1   | 0.04761904762 | 0.04761904762 | 0.05555555556 |  | 0.7          | #DIV/0! |
| SARNP   | 0.04761904762 | 0.04761904762 | 0.05555555556 |  | 0.7          | #DIV/0! |
| SARS    | 0.04761904762 | 0.04761904762 | 0.05555555556 |  | 0.7          | #DIV/0! |
| SARS2   | 0.04761904762 | 0.04761904762 | 0.05555555556 |  | 0.7          | #DIV/0! |
| SART3   | 0.04761904762 | 0.04761904762 | 0.05555555556 |  | 0.7          | #DIV/0! |
| SASS6   | 0.04761904762 | 0.04761904762 | 0.05555555556 |  | 0.7          | #DIV/0! |
| SAT2    | 0             | 0             | 0.05555555556 |  | 0            | #DIV/0! |
| SATB1   | 0.04761904762 | 0.04761904762 | 0             |  | inf          | #DIV/0! |
| ATB1-AS | 0.04761904762 | 0.04761904762 | 0             |  | inf          | #DIV/0! |
| SATB2   | 0             | 0             | 0.05555555556 |  | 0            | #DIV/0! |
| ATB2-AS | 0             | 0             | 0.05555555556 |  | 0            | #DIV/0! |
| SAV1    | 0.04761904762 | 0.04761904762 | 0             |  | inf          | #DIV/0! |
| SAXO1   | 0.04761904762 | 0.04761904762 | 0.05555555556 |  | 0.7          | #DIV/0! |
| SAXO2   | 0.04761904762 | 0.04761904762 | 0.05555555556 |  | 0.7          | #DIV/0! |
| SAYSDI  | 0.04761904762 | 0.04761904762 | 0.05555555556 |  | 0.7          | #DIV/0! |
| SBDS    | 0.04761904762 | 0.04761904762 | 0.1111111111  |  | 0.325        | #DIV/0! |
| SBDSP1  | 0.1428571429  | 0.1428571429  | 0.1111111111  |  | 1.083333333  | #DIV/0! |
| SBF1    | 0             | 0             | 0.1111111111  |  | 0            | #DIV/0! |
| SBF1P1  | 0.1428571429  | 0.1428571429  | 0.1111111111  |  | 1.083333333  | #DIV/0! |
| SBF2    | 0.04761904762 | 0.04761904762 | 0.05555555556 |  | 0.7          | #DIV/0! |
| BF2-AS  | 0.04761904762 | 0.04761904762 | 0.05555555556 |  | 0.7          | #DIV/0! |
| SBK1    | 0.04761904762 | 0.04761904762 | 0             |  | inf          | #DIV/0! |
| SBK2    | 0.09523809524 | 0.09523809524 | 0.05555555556 |  | 1.473684211  | #DIV/0! |
| SBK3    | 0.09523809524 | 0.09523809524 | 0.05555555556 |  | 1.473684211  | #DIV/0! |
| SBNO1   | 0.04761904762 | 0.04761904762 | 0.1111111111  |  | 0.325        | #DIV/0! |
| SBNO2   | 0.09523809524 | 0.09523809524 | 0.1111111111  |  | 0.6842105263 | #DIV/0! |
| SBSN    | 0.04761904762 | 0.04761904762 | 0.05555555556 |  | 0.7          | #DIV/0! |
| SBSPON  | 0.1904761905  | 0.1904761905  | 0.1666666667  |  | 0.9411764706 | #DIV/0! |
| CAANT   | 0.04761904762 | 0.04761904762 | 0             |  | inf          | #DIV/0! |
| SCAF1   | 0.09523809524 | 0.09523809524 | 0.1111111111  |  | 0.6842105263 | #DIV/0! |
| SCAF11  | 0.04761904762 | 0.04761904762 | 0.05555555556 |  | 0.7          | #DIV/0! |
| SCAF4   | 0.04761904762 | 0.04761904762 | 0.1111111111  |  | 0.325        | #DIV/0! |
| SCAI    | 0.09523809524 | 0.09523809524 | 0.05555555556 |  | 1.473684211  | #DIV/0! |
| SCAMP1  | 0.04761904762 | 0.04761904762 | 0             |  | inf          | #DIV/0! |
| AMP1-A  | 0.04761904762 | 0.04761904762 | 0             |  | inf          | #DIV/0! |
| SCAMP2  | 0.04761904762 | 0.04761904762 | 0.05555555556 |  | 0.7          | #DIV/0! |
| SCAMP3  | 0.1904761905  | 0.1904761905  | 0.1111111111  |  | 1.529411765  | #DIV/0! |
| SCAMP4  | 0.09523809524 | 0.09523809524 | 0.1111111111  |  | 0.6842105263 | #DIV/0! |
| SCAMP5  | 0.04761904762 | 0.04761904762 | 0.05555555556 |  | 0.7          | #DIV/0! |
| SCAND1  | 0.09523809524 | 0.09523809524 | 0.1111111111  |  | 0.6842105263 | #DIV/0! |
| CAND2   | 0.04761904762 | 0.04761904762 | 0.05555555556 |  | 0.7          | #DIV/0! |
| SCAP    | 0.09523809524 | 0.09523809524 | 0             |  | inf          | #DIV/0! |
| SCAPER  | 0.04761904762 | 0.04761904762 | 0.05555555556 |  | 0.7          | #DIV/0! |
| SCARA3  | 0.04761904762 | 0.04761904762 | 0.1111111111  |  | 0.325        | #DIV/0! |



|        |               |               |               |  |             |         |
|--------|---------------|---------------|---------------|--|-------------|---------|
| SCARAS | 0.04761904762 | 0.04761904762 | 0.1111111111  |  | 0.325       | #DIV/0! |
| SCARB1 | 0.04761904762 | 0.04761904762 | 0.05555555556 |  | 0.7         | #DIV/0! |
| SCARB2 | 0.04761904762 | 0.04761904762 | 0.05555555556 |  | 0.7         | #DIV/0! |
| SCARF1 | 0             | 0             | 0.1111111111  |  | 0           | #DIV/0! |
| SCARF2 | 0.04761904762 | 0.04761904762 | 0.05555555556 |  | 0.7         | #DIV/0! |
| CARNA0 | 0.04761904762 | 0.04761904762 | 0.1111111111  |  | 0.325       | #DIV/0! |
| CARNA0 | 0.04761904762 | 0.04761904762 | 0.1111111111  |  | 0.325       | #DIV/0! |
| CARNA0 | 0.04761904762 | 0.04761904762 | 0.1111111111  |  | 0.325       | #DIV/0! |
| CARNA0 | 0.04761904762 | 0.04761904762 | 0.1111111111  |  | 0.325       | #DIV/0! |
| CARNA0 | 0.04761904762 | 0.04761904762 | 0.05555555556 |  | 0.7         | #DIV/0! |
| CARNA0 | 0.04761904762 | 0.04761904762 | 0.05555555556 |  | 0.7         | #DIV/0! |
| CARNA0 | 0.04761904762 | 0.04761904762 | 0             |  | inf         | #DIV/0! |
| CARNA0 | 0.04761904762 | 0.04761904762 | 0             |  | inf         | #DIV/0! |
| CARNA0 | 0.04761904762 | 0.04761904762 | 0.05555555556 |  | 0.7         | #DIV/0! |
| CARNA0 | 0.04761904762 | 0.04761904762 | 0.05555555556 |  | 0.7         | #DIV/0! |
| CARNA2 | 0.1428571429  | 0.1428571429  | 0             |  | inf         | #DIV/0! |
| CARNA2 | 0             | 0             | 0.05555555556 |  | 0           | #DIV/0! |
| ARNA2  | 0.04761904762 | 0.04761904762 | 0.1111111111  |  | 0.325       | #DIV/0! |
| CARNA2 | 0.04761904762 | 0.04761904762 | 0             |  | inf         | #DIV/0! |
| ARNA2  | 0.1904761905  | 0.1904761905  | 0.1111111111  |  | 1.529411765 | #DIV/0! |
| ARNA2  | 0.1904761905  | 0.1904761905  | 0.1111111111  |  | 1.529411765 | #DIV/0! |
| CARNA2 | 0.04761904762 | 0.04761904762 | 0.05555555556 |  | 0.7         | #DIV/0! |
| CARNA  | 0.1428571429  | 0.1428571429  | 0             |  | inf         | #DIV/0! |
| CARNA  | 0.1904761905  | 0.1904761905  | 0.1111111111  |  | 1.529411765 | #DIV/0! |
| CARNA  | 0             | 0             | 0.05555555556 |  | 0           | #DIV/0! |
| CARNA  | 0             | 0             | 0.05555555556 |  | 0           | #DIV/0! |
| CARNA  | 0.1428571429  | 0.1428571429  | 0.05555555556 |  | 2.333333333 | #DIV/0! |
| CARNA  | 0.04761904762 | 0.04761904762 | 0.05555555556 |  | 0.7         | #DIV/0! |
| SCART1 | 0.1904761905  | 0.1904761905  | 0             |  | inf         | #DIV/0! |
| SCAT1  | 0.04761904762 | 0.04761904762 | 0             |  | inf         | #DIV/0! |
| SCAT2  | 0.04761904762 | 0.04761904762 | 0.05555555556 |  | 0.7         | #DIV/0! |
| SCCPDF | 0.1428571429  | 0.1428571429  | 0.05555555556 |  | 2.333333333 | #DIV/0! |
| SCD    | 0.1428571429  | 0.1428571429  | 0             |  | inf         | #DIV/0! |
| SCD5   | 0             | 0             | 0.05555555556 |  | 0           | #DIV/0! |
| SCFD2  | 0.2380952381  | 0.2380952381  | 0.05555555556 |  | 4.375       | #DIV/0! |
| SCG2   | 0             | 0             | 0.05555555556 |  | 0           | #DIV/0! |
| SCG3   | 0.04761904762 | 0.04761904762 | 0.05555555556 |  | 0.7         | #DIV/0! |
| CGB1B2 | 0.04761904762 | 0.04761904762 | 0.05555555556 |  | 0.7         | #DIV/0! |
| CGB1C  | 0.04761904762 | 0.04761904762 | 0             |  | inf         | #DIV/0! |
| CGB1C  | 0.04761904762 | 0.04761904762 | 0             |  | inf         | #DIV/0! |
| CGB2B  | 0.04761904762 | 0.04761904762 | 0.05555555556 |  | 0.7         | #DIV/0! |
| CGB2B3 | 0.04761904762 | 0.04761904762 | 0.05555555556 |  | 0.7         | #DIV/0! |
| CGB3A  | 0.09523809524 | 0.09523809524 | 0.05555555556 |  | 1.473684211 | #DIV/0! |
| SCGN   | 0             | 0             | 0.05555555556 |  | 0           | #DIV/0! |
| SCHIP1 | 0.1428571429  | 0.1428571429  | 0.05555555556 |  | 2.333333333 | #DIV/0! |
| CHLAP  | 0             | 0             | 0.05555555556 |  | 0           | #DIV/0! |
| SCIMP  | 0             | 0             | 0.1111111111  |  | 0           | #DIV/0! |
| SCIN   | 0.04761904762 | 0.04761904762 | 0.2222222222  |  | 0.1375      | #DIV/0! |
| SCLT1  | 0             | 0             | 0.05555555556 |  | 0           | #DIV/0! |
| SCLY   | 0             | 0             | 0.05555555556 |  | 0           | #DIV/0! |
| SCMH1  | 0.04761904762 | 0.04761904762 | 0.05555555556 |  | 0.7         | #DIV/0! |

|          |               |               |               |  |              |         |
|----------|---------------|---------------|---------------|--|--------------|---------|
| SCML4    | 0             | 0             | 0             |  |              | #DIV/0! |
| SCN10A   | 0.04761904762 | 0.04761904762 | 0             |  | inf          | #DIV/0! |
| SCN11A   | 0.04761904762 | 0.04761904762 | 0             |  | inf          | #DIV/0! |
| SCN1A    | 0             | 0             | 0.05555555556 |  | 0            | #DIV/0! |
| SCN1A-AS | 0             | 0             | 0.05555555556 |  | 0            | #DIV/0! |
| SCN1B    | 0.04761904762 | 0.04761904762 | 0.05555555556 |  | 0.7          | #DIV/0! |
| SCN2A    | 0             | 0             | 0.05555555556 |  | 0            | #DIV/0! |
| SCN3A    | 0             | 0             | 0.05555555556 |  | 0            | #DIV/0! |
| SCN4A    | 0.04761904762 | 0.04761904762 | 0             |  | inf          | #DIV/0! |
| SCN5A    | 0.04761904762 | 0.04761904762 | 0             |  | inf          | #DIV/0! |
| SCN7A    | 0             | 0             | 0.05555555556 |  | 0            | #DIV/0! |
| SCN8A    | 0.04761904762 | 0.04761904762 | 0.05555555556 |  | 0.7          | #DIV/0! |
| SCN9A    | 0             | 0             | 0.05555555556 |  | 0            | #DIV/0! |
| SCNMI    | 0.1904761905  | 0.1904761905  | 0.05555555556 |  | 3.294117647  | #DIV/0! |
| SCNN1A   | 0.04761904762 | 0.04761904762 | 0.1111111111  |  | 0.325        | #DIV/0! |
| SCNN1B   | 0.04761904762 | 0.04761904762 | 0             |  | inf          | #DIV/0! |
| SCNN1D   | 0             | 0             | 0.1111111111  |  | 0            | #DIV/0! |
| SCNN1G   | 0.04761904762 | 0.04761904762 | 0             |  | inf          | #DIV/0! |
| SCO1     | 0.04761904762 | 0.04761904762 | 0.05555555556 |  | 0.7          | #DIV/0! |
| SCO2     | 0             | 0             | 0.1111111111  |  | 0            | #DIV/0! |
| SCOC     | 0             | 0             | 0.05555555556 |  | 0            | #DIV/0! |
| SCOC-AS  | 0             | 0             | 0.05555555556 |  | 0            | #DIV/0! |
| SCP2     | 0.04761904762 | 0.04761904762 | 0.05555555556 |  | 0.7          | #DIV/0! |
| SCP2D1   | 0.1904761905  | 0.1904761905  | 0.05555555556 |  | 3.294117647  | #DIV/0! |
| SCPEP1   | 0.09523809524 | 0.09523809524 | 0             |  | inf          | #DIV/0! |
| SCRG1    | 0             | 0             | 0.05555555556 |  | 0            | #DIV/0! |
| SCRIB    | 0.04761904762 | 0.04761904762 | 0.1666666667  |  | 0.2          | #DIV/0! |
| SCRN1    | 0.04761904762 | 0.04761904762 | 0.1666666667  |  | 0.2          | #DIV/0! |
| SCRN2    | 0.1428571429  | 0.1428571429  | 0             |  | inf          | #DIV/0! |
| SCRN3    | 0             | 0             | 0.1111111111  |  | 0            | #DIV/0! |
| SCRT1    | 0.04761904762 | 0.04761904762 | 0.1666666667  |  | 0.2          | #DIV/0! |
| SCRT2    | 0.1904761905  | 0.1904761905  | 0.05555555556 |  | 3.294117647  | #DIV/0! |
| SCT      | 0.04761904762 | 0.04761904762 | 0             |  | inf          | #DIV/0! |
| SCTR     | 0             | 0             | 0.05555555556 |  | 0            | #DIV/0! |
| SCUBE1   | 0             | 0             | 0.1666666667  |  | 0            | #DIV/0! |
| SCUBE3   | 0.04761904762 | 0.04761904762 | 0             |  | inf          | #DIV/0! |
| SCX      | 0.04761904762 | 0.04761904762 | 0.1666666667  |  | 0.2          | #DIV/0! |
| SCYL2    | 0.04761904762 | 0.04761904762 | 0.05555555556 |  | 0.7          | #DIV/0! |
| SCYL3    | 0.1428571429  | 0.1428571429  | 0.05555555556 |  | 2.333333333  | #DIV/0! |
| SDAD1    | 0.04761904762 | 0.04761904762 | 0.05555555556 |  | 0.7          | #DIV/0! |
| SDAD1P   | 0.04761904762 | 0.04761904762 | 0.1111111111  |  | 0.325        | #DIV/0! |
| SDC1     | 0             | 0             | 0.05555555556 |  | 0            | #DIV/0! |
| SDC2     | 0.1904761905  | 0.1904761905  | 0.1666666667  |  | 0.9411764706 | #DIV/0! |
| SDC3     | 0.04761904762 | 0.04761904762 | 0.1111111111  |  | 0.325        | #DIV/0! |
| SDC4     | 0.1428571429  | 0.1428571429  | 0.1666666667  |  | 0.6666666667 | #DIV/0! |
| SDC4P    | 0.04761904762 | 0.04761904762 | 0.1111111111  |  | 0.325        | #DIV/0! |
| SDCBP    | 0.1428571429  | 0.1428571429  | 0.1666666667  |  | 0.6666666667 | #DIV/0! |
| SDCBP2   | 0.1904761905  | 0.1904761905  | 0.1111111111  |  | 1.529411765  | #DIV/0! |
| CBP2-A   | 0.1904761905  | 0.1904761905  | 0.1111111111  |  | 1.529411765  | #DIV/0! |
| DCCAG    | 0.1428571429  | 0.1428571429  | 0.05555555556 |  | 2.333333333  | #DIV/0! |
| SDE2     | 0.1428571429  | 0.1428571429  | 0.05555555556 |  | 2.333333333  | #DIV/0! |

|         |               |               |               |  |              |         |
|---------|---------------|---------------|---------------|--|--------------|---------|
| SDF2    | 0.04761904762 | 0.04761904762 | 0.05555555556 |  | 0.7          | #DIV/0! |
| SDF2L1  | 0.04761904762 | 0.04761904762 | 0.05555555556 |  | 0.7          | #DIV/0! |
| SDF4    | 0             | 0             | 0.1111111111  |  | 0            | #DIV/0! |
| SDHA    | 0             | 0             | 0.05555555556 |  | 0            | #DIV/0! |
| SDHAF1  | 0.04761904762 | 0.04761904762 | 0.05555555556 |  | 0.7          | #DIV/0! |
| SDHAF3  | 0.04761904762 | 0.04761904762 | 0.1111111111  |  | 0.325        | #DIV/0! |
| SDHAP1  | 0.1428571429  | 0.1428571429  | 0.05555555556 |  | 2.333333333  | #DIV/0! |
| SDHAP2  | 0.1428571429  | 0.1428571429  | 0.05555555556 |  | 2.333333333  | #DIV/0! |
| SDHAP3  | 0             | 0             | 0.1111111111  |  | 0            | #DIV/0! |
| SDHB    | 0.04761904762 | 0.04761904762 | 0.1111111111  |  | 0.325        | #DIV/0! |
| SDHC    | 0.1428571429  | 0.1428571429  | 0             |  | inf          | #DIV/0! |
| SDK1    | 0.09523809524 | 0.09523809524 | 0.1666666667  |  | 0.4210526316 | #DIV/0! |
| SDK2    | 0.04761904762 | 0.04761904762 | 0             |  | inf          | #DIV/0! |
| SDR16C5 | 0.1428571429  | 0.1428571429  | 0.1111111111  |  | 1.083333333  | #DIV/0! |
| DR16C6  | 0.1428571429  | 0.1428571429  | 0.1111111111  |  | 1.083333333  | #DIV/0! |
| SDR42E1 | 0.04761904762 | 0.04761904762 | 0             |  | inf          | #DIV/0! |
| SDR42E2 | 0.04761904762 | 0.04761904762 | 0             |  | inf          | #DIV/0! |
| SDR9C7  | 0.1428571429  | 0.1428571429  | 0.05555555556 |  | 2.333333333  | #DIV/0! |
| SDS     | 0             | 0             | 0.05555555556 |  | 0            | #DIV/0! |
| SDSL    | 0             | 0             | 0.05555555556 |  | 0            | #DIV/0! |
| SEBOX   | 0.04761904762 | 0.04761904762 | 0.05555555556 |  | 0.7          | #DIV/0! |
| SEC11A  | 0.04761904762 | 0.04761904762 | 0.05555555556 |  | 0.7          | #DIV/0! |
| SEC11C  | 0.09523809524 | 0.09523809524 | 0             |  | inf          | #DIV/0! |
| SEC13   | 0.09523809524 | 0.09523809524 | 0             |  | inf          | #DIV/0! |
| SEC14L1 | 0.04761904762 | 0.04761904762 | 0             |  | inf          | #DIV/0! |
| SEC14L2 | 0.04761904762 | 0.04761904762 | 0.1111111111  |  | 0.325        | #DIV/0! |
| SEC14L3 | 0.04761904762 | 0.04761904762 | 0.1111111111  |  | 0.325        | #DIV/0! |
| SEC14L4 | 0.04761904762 | 0.04761904762 | 0.1111111111  |  | 0.325        | #DIV/0! |
| SEC14L5 | 0.04761904762 | 0.04761904762 | 0             |  | inf          | #DIV/0! |
| SEC14L6 | 0.04761904762 | 0.04761904762 | 0.1111111111  |  | 0.325        | #DIV/0! |
| SEC16A  | 0.1428571429  | 0.1428571429  | 0.05555555556 |  | 2.333333333  | #DIV/0! |
| SEC16B  | 0.1428571429  | 0.1428571429  | 0             |  | inf          | #DIV/0! |
| SEC1P   | 0.09523809524 | 0.09523809524 | 0.1111111111  |  | 0.6842105263 | #DIV/0! |
| SEC22A  | 0.04761904762 | 0.04761904762 | 0.05555555556 |  | 0.7          | #DIV/0! |
| SEC22B  | 0.09523809524 | 0.09523809524 | 0.05555555556 |  | 1.473684211  | #DIV/0! |
| SEC22B1 | 0.1428571429  | 0.1428571429  | 0.05555555556 |  | 2.333333333  | #DIV/0! |
| SEC22B3 | 0.1428571429  | 0.1428571429  | 0.05555555556 |  | 2.333333333  | #DIV/0! |
| SEC22C  | 0.04761904762 | 0.04761904762 | 0             |  | inf          | #DIV/0! |
| SEC23A  | 0.04761904762 | 0.04761904762 | 0.05555555556 |  | 0.7          | #DIV/0! |
| C23A-A  | 0.04761904762 | 0.04761904762 | 0.05555555556 |  | 0.7          | #DIV/0! |
| SEC23B  | 0.1904761905  | 0.1904761905  | 0.05555555556 |  | 3.294117647  | #DIV/0! |
| SEC23IF | 0.2380952381  | 0.2380952381  | 0             |  | inf          | #DIV/0! |
| SEC24A  | 0.04761904762 | 0.04761904762 | 0             |  | inf          | #DIV/0! |
| SEC24B  | 0             | 0             | 0.05555555556 |  | 0            | #DIV/0! |
| C24B-A  | 0             | 0             | 0.05555555556 |  | 0            | #DIV/0! |
| SEC24D  | 0             | 0             | 0.05555555556 |  | 0            | #DIV/0! |
| SEC31A  | 0             | 0             | 0.05555555556 |  | 0            | #DIV/0! |
| SEC31B  | 0.1428571429  | 0.1428571429  | 0             |  | inf          | #DIV/0! |
| SEC61A1 | 0.09523809524 | 0.09523809524 | 0.05555555556 |  | 1.473684211  | #DIV/0! |
| SEC61A2 | 0.09523809524 | 0.09523809524 | 0.1111111111  |  | 0.6842105263 | #DIV/0! |
| SEC61B  | 0.04761904762 | 0.04761904762 | 0             |  | inf          | #DIV/0! |

|               |               |               |              |  |              |         |
|---------------|---------------|---------------|--------------|--|--------------|---------|
| SEC61G        | 0.380952381   | 0.380952381   | 0.1666666667 |  | 2.461538462  | #DIV/0! |
| SEC62         | 0.1904761905  | 0.1904761905  | 0.0555555556 |  | 3.294117647  | #DIV/0! |
| SEC63         | 0             | 0             | 0            |  |              | #DIV/0! |
| ECISBP0       | 0.04761904762 | 0.04761904762 | 0.0555555556 |  | 0.7          | #DIV/0! |
| ECISBP2       | 0.04761904762 | 0.04761904762 | 0.0555555556 |  | 0.7          | #DIV/0! |
| SECTM0        | 0.04761904762 | 0.04761904762 | 0            |  | inf          | #DIV/0! |
| SEH1L         | 0.09523809524 | 0.09523809524 | 0.0555555556 |  | 1.473684211  | #DIV/0! |
| SEL1L2        | 0.1904761905  | 0.1904761905  | 0.1111111111 |  | 1.529411765  | #DIV/0! |
| SELE          | 0.1428571429  | 0.1428571429  | 0            |  | inf          | #DIV/0! |
| ELENB0        | 0.1904761905  | 0.1904761905  | 0.0555555556 |  | 3.294117647  | #DIV/0! |
| ELENO0        | 0.04761904762 | 0.04761904762 | 0.0555555556 |  | 0.7          | #DIV/0! |
| ELENO1        | 0.04761904762 | 0.04761904762 | 0            |  | inf          | #DIV/0! |
| ELENO10       | 0.04761904762 | 0.04761904762 | 0.1111111111 |  | 0.325        | #DIV/0! |
| ELENO00       | 0.04761904762 | 0.04761904762 | 0.1111111111 |  | 0.325        | #DIV/0! |
| ELENO000      | 0             | 0             | 0.1111111111 |  | 0            | #DIV/0! |
| ELENO0000     | 0.04761904762 | 0.04761904762 | 0.0555555556 |  | 0.7          | #DIV/0! |
| ELENO00000    | 0.04761904762 | 0.04761904762 | 0.0555555556 |  | 0.7          | #DIV/0! |
| ELENO000000   | 0.1904761905  | 0.1904761905  | 0.1111111111 |  | 1.529411765  | #DIV/0! |
| ELENO0000000  | 0.04761904762 | 0.04761904762 | 0.0555555556 |  | 0.7          | #DIV/0! |
| ELENO00000000 | 0.09523809524 | 0.09523809524 | 0.1111111111 |  | 0.6842105263 | #DIV/0! |
| SELL          | 0.1428571429  | 0.1428571429  | 0            |  | inf          | #DIV/0! |
| SELP          | 0.1428571429  | 0.1428571429  | 0            |  | inf          | #DIV/0! |
| SELPLG0       | 0.04761904762 | 0.04761904762 | 0.0555555556 |  | 0.7          | #DIV/0! |
| SEM1          | 0.04761904762 | 0.04761904762 | 0.1111111111 |  | 0.325        | #DIV/0! |
| SEMA3A0       | 0.04761904762 | 0.04761904762 | 0.1111111111 |  | 0.325        | #DIV/0! |
| SEMA3B0       | 0.09523809524 | 0.09523809524 | 0            |  | inf          | #DIV/0! |
| MA3B-A0       | 0.09523809524 | 0.09523809524 | 0            |  | inf          | #DIV/0! |
| SEMA3C0       | 0.04761904762 | 0.04761904762 | 0.1111111111 |  | 0.325        | #DIV/0! |
| SEMA3D0       | 0.04761904762 | 0.04761904762 | 0.1111111111 |  | 0.325        | #DIV/0! |
| SEMA3E0       | 0.04761904762 | 0.04761904762 | 0.1111111111 |  | 0.325        | #DIV/0! |
| SEMA3F0       | 0.09523809524 | 0.09523809524 | 0            |  | inf          | #DIV/0! |
| MA3F-A0       | 0.09523809524 | 0.09523809524 | 0            |  | inf          | #DIV/0! |
| SEMA3C00      | 0.04761904762 | 0.04761904762 | 0            |  | inf          | #DIV/0! |
| SEMA4B0       | 0.04761904762 | 0.04761904762 | 0.0555555556 |  | 0.7          | #DIV/0! |
| SEMA4C0       | 0             | 0             | 0.1111111111 |  | 0            | #DIV/0! |
| SEMA4D0       | 0.04761904762 | 0.04761904762 | 0.0555555556 |  | 0.7          | #DIV/0! |
| SEMA4E0       | 0             | 0             | 0.0555555556 |  | 0            | #DIV/0! |
| SEMA4C00      | 0.1428571429  | 0.1428571429  | 0            |  | inf          | #DIV/0! |
| SEMA5A0       | 0             | 0             | 0.0555555556 |  | 0            | #DIV/0! |
| MA5A-A0       | 0             | 0             | 0.0555555556 |  | 0            | #DIV/0! |
| SEMA5B0       | 0.04761904762 | 0.04761904762 | 0.0555555556 |  | 0.7          | #DIV/0! |
| SEMA6A0       | 0.04761904762 | 0.04761904762 | 0            |  | inf          | #DIV/0! |
| MA6A-A0       | 0.04761904762 | 0.04761904762 | 0            |  | inf          | #DIV/0! |
| MA6A-A00      | 0.04761904762 | 0.04761904762 | 0            |  | inf          | #DIV/0! |
| SEMA6B0       | 0.09523809524 | 0.09523809524 | 0.0555555556 |  | 1.473684211  | #DIV/0! |
| SEMA6C0       | 0.1904761905  | 0.1904761905  | 0.0555555556 |  | 3.294117647  | #DIV/0! |
| SEMA6D0       | 0.04761904762 | 0.04761904762 | 0.0555555556 |  | 0.7          | #DIV/0! |
| SEMA7A0       | 0.04761904762 | 0.04761904762 | 0.0555555556 |  | 0.7          | #DIV/0! |
| SEMG1         | 0.1428571429  | 0.1428571429  | 0.1666666667 |  | 0.6666666667 | #DIV/0! |
| SEMG2         | 0.1428571429  | 0.1428571429  | 0.1666666667 |  | 0.6666666667 | #DIV/0! |
| SENPI0        | 0.04761904762 | 0.04761904762 | 0.0555555556 |  | 0.7          | #DIV/0! |

|         |               |               |               |  |              |         |
|---------|---------------|---------------|---------------|--|--------------|---------|
| SENP2   | 0.1428571429  | 0.1428571429  | 0.05555555556 |  | 2.333333333  | #DIV/0! |
| SENP3   | 0             | 0             | 0.05555555556 |  | 0            | #DIV/0! |
| NP3-EIP | 0             | 0             | 0.05555555556 |  | 0            | #DIV/0! |
| SENP5   | 0.1428571429  | 0.1428571429  | 0.05555555556 |  | 2.333333333  | #DIV/0! |
| SENP7   | 0.09523809524 | 0.09523809524 | 0.05555555556 |  | 1.473684211  | #DIV/0! |
| SENP8   | 0.04761904762 | 0.04761904762 | 0.05555555556 |  | 0.7          | #DIV/0! |
| SEPHS1  | 0.09523809524 | 0.09523809524 | 0.1111111111  |  | 0.6842105263 | #DIV/0! |
| SEPHS2  | 0.04761904762 | 0.04761904762 | 0             |  | inf          | #DIV/0! |
| SEPT1   | 0.04761904762 | 0.04761904762 | 0             |  | inf          | #DIV/0! |
| SEPT10  | 0             | 0             | 0.05555555556 |  | 0            | #DIV/0! |
| SEPT11  | 0.04761904762 | 0.04761904762 | 0.05555555556 |  | 0.7          | #DIV/0! |
| SEPT12  | 0.04761904762 | 0.04761904762 | 0             |  | inf          | #DIV/0! |
| SEPT14  | 0.3333333333  | 0.3333333333  | 0.2222222222  |  | 1.375        | #DIV/0! |
| SEPT2   | 0             | 0             | 0.05555555556 |  | 0            | #DIV/0! |
| SEPT3   | 0             | 0             | 0.1111111111  |  | 0            | #DIV/0! |
| SEPT4   | 0.1428571429  | 0.1428571429  | 0             |  | inf          | #DIV/0! |
| EPT4-AS | 0.1428571429  | 0.1428571429  | 0             |  | inf          | #DIV/0! |
| SEPT5   | 0.04761904762 | 0.04761904762 | 0.05555555556 |  | 0.7          | #DIV/0! |
| PT5-GPI | 0.04761904762 | 0.04761904762 | 0.05555555556 |  | 0.7          | #DIV/0! |
| SEPT7   | 0.04761904762 | 0.04761904762 | 0.2222222222  |  | 0.1375       | #DIV/0! |
| EPT7-AS | 0.04761904762 | 0.04761904762 | 0.2222222222  |  | 0.1375       | #DIV/0! |
| SEPT7P  | 0.04761904762 | 0.04761904762 | 0.2222222222  |  | 0.1375       | #DIV/0! |
| SEPT7P9 | 0.09523809524 | 0.09523809524 | 0.1111111111  |  | 0.6842105263 | #DIV/0! |
| SEPT8   | 0.04761904762 | 0.04761904762 | 0             |  | inf          | #DIV/0! |
| SEPT9   | 0.04761904762 | 0.04761904762 | 0             |  | inf          | #DIV/0! |
| SERBP1  | 0.04761904762 | 0.04761904762 | 0.05555555556 |  | 0.7          | #DIV/0! |
| SERF1A  | 0.09523809524 | 0.09523809524 | 0.1666666667  |  | 0.4210526316 | #DIV/0! |
| SERF1B  | 0.09523809524 | 0.09523809524 | 0.1666666667  |  | 0.4210526316 | #DIV/0! |
| SERHL   | 0             | 0             | 0.1666666667  |  | 0            | #DIV/0! |
| SERHL2  | 0             | 0             | 0.1666666667  |  | 0            | #DIV/0! |
| SERINC  | 0.04761904762 | 0.04761904762 | 0.1111111111  |  | 0.325        | #DIV/0! |
| SERINC3 | 0.1428571429  | 0.1428571429  | 0.1666666667  |  | 0.6666666667 | #DIV/0! |
| SERINC5 | 0.04761904762 | 0.04761904762 | 0             |  | inf          | #DIV/0! |
| SERP1   | 0.1904761905  | 0.1904761905  | 0.1111111111  |  | 1.529411765  | #DIV/0! |
| ERPINB  | 0.04761904762 | 0.04761904762 | 0             |  | inf          | #DIV/0! |
| ERPINB  | 0.04761904762 | 0.04761904762 | 0             |  | inf          | #DIV/0! |
| ERPINB  | 0.04761904762 | 0.04761904762 | 0             |  | inf          | #DIV/0! |
| ERPINB  | 0.04761904762 | 0.04761904762 | 0             |  | inf          | #DIV/0! |
| ERPINB  | 0.04761904762 | 0.04761904762 | 0             |  | inf          | #DIV/0! |
| ERPINB  | 0.04761904762 | 0.04761904762 | 0             |  | inf          | #DIV/0! |
| ERPINB  | 0.04761904762 | 0.04761904762 | 0             |  | inf          | #DIV/0! |
| ERPINB  | 0.04761904762 | 0.04761904762 | 0             |  | inf          | #DIV/0! |
| ERPINB  | 0.04761904762 | 0.04761904762 | 0             |  | inf          | #DIV/0! |
| ERPINB  | 0.04761904762 | 0.04761904762 | 0             |  | inf          | #DIV/0! |
| ERPINC  | 0.1428571429  | 0.1428571429  | 0             |  | inf          | #DIV/0! |
| ERPIND  | 0.04761904762 | 0.04761904762 | 0.05555555556 |  | 0.7          | #DIV/0! |
| ERPINE  | 0.04761904762 | 0.04761904762 | 0.05555555556 |  | 0.7          | #DIV/0! |
| ERPINE  | 0             | 0             | 0.05555555556 |  | 0            | #DIV/0! |
| ERPINF  | 0             | 0             | 0.1111111111  |  | 0            | #DIV/0! |
| ERPINF  | 0             | 0             | 0.1111111111  |  | 0            | #DIV/0! |
| ERPINI  | 0.1428571429  | 0.1428571429  | 0.05555555556 |  | 2.333333333  | #DIV/0! |

|         |               |               |               |  |              |         |
|---------|---------------|---------------|---------------|--|--------------|---------|
| ERPINI  | 0.1428571429  | 0.1428571429  | 0.05555555556 |  | 2.333333333  | #DIV/0! |
| ERTAD0  | 0.04761904762 | 0.04761904762 | 0.05555555556 |  | 0.7          | #DIV/0! |
| ERTAD   | 0             | 0             | 0.05555555556 |  | 0            | #DIV/0! |
| ERTAD0  | 0.04761904762 | 0.04761904762 | 0.05555555556 |  | 0.7          | #DIV/0! |
| ERTAD   | 0.1428571429  | 0.1428571429  | 0             |  | inf          | #DIV/0! |
| RTAD4-A | 0.1428571429  | 0.1428571429  | 0             |  | inf          | #DIV/0! |
| SESN1   | 0             | 0             | 0             |  |              | #DIV/0! |
| SESN2   | 0.04761904762 | 0.04761904762 | 0.1111111111  |  | 0.325        | #DIV/0! |
| SESTD1  | 0             | 0             | 0.05555555556 |  | 0            | #DIV/0! |
| SET     | 0.09523809524 | 0.09523809524 | 0.05555555556 |  | 1.473684211  | #DIV/0! |
| SETBP1  | 0.04761904762 | 0.04761904762 | 0             |  | inf          | #DIV/0! |
| SETD1A  | 0.04761904762 | 0.04761904762 | 0             |  | inf          | #DIV/0! |
| SETD1B  | 0.04761904762 | 0.04761904762 | 0.1111111111  |  | 0.325        | #DIV/0! |
| SETD2   | 0.09523809524 | 0.09523809524 | 0             |  | inf          | #DIV/0! |
| SETD4   | 0.04761904762 | 0.04761904762 | 0.1666666667  |  | 0.2          | #DIV/0! |
| SETD5   | 0.09523809524 | 0.09523809524 | 0             |  | inf          | #DIV/0! |
| SETD6   | 0.04761904762 | 0.04761904762 | 0             |  | inf          | #DIV/0! |
| SETD7   | 0             | 0             | 0.05555555556 |  | 0            | #DIV/0! |
| SETD9   | 0.04761904762 | 0.04761904762 | 0.05555555556 |  | 0.7          | #DIV/0! |
| SETDB1  | 0.1904761905  | 0.1904761905  | 0.05555555556 |  | 3.294117647  | #DIV/0! |
| ETMAF   | 0.04761904762 | 0.04761904762 | 0             |  | inf          | #DIV/0! |
| SETSIP  | 0.04761904762 | 0.04761904762 | 0.05555555556 |  | 0.7          | #DIV/0! |
| SETX    | 0.09523809524 | 0.09523809524 | 0             |  | inf          | #DIV/0! |
| SEZ6    | 0.04761904762 | 0.04761904762 | 0.05555555556 |  | 0.7          | #DIV/0! |
| SEZ6L   | 0.04761904762 | 0.04761904762 | 0.05555555556 |  | 0.7          | #DIV/0! |
| SEZ6L2  | 0.04761904762 | 0.04761904762 | 0             |  | inf          | #DIV/0! |
| SF3A1   | 0.04761904762 | 0.04761904762 | 0.1111111111  |  | 0.325        | #DIV/0! |
| SF3A2   | 0.09523809524 | 0.09523809524 | 0.1111111111  |  | 0.6842105263 | #DIV/0! |
| SF3A3   | 0.04761904762 | 0.04761904762 | 0.05555555556 |  | 0.7          | #DIV/0! |
| SF3B1   | 0             | 0             | 0.05555555556 |  | 0            | #DIV/0! |
| SF3B3   | 0.1428571429  | 0.1428571429  | 0.05555555556 |  | 2.333333333  | #DIV/0! |
| SF3B4   | 0.1428571429  | 0.1428571429  | 0.05555555556 |  | 2.333333333  | #DIV/0! |
| SF11    | 0.04761904762 | 0.04761904762 | 0.1111111111  |  | 0.325        | #DIV/0! |
| SFMBT1  | 0.04761904762 | 0.04761904762 | 0             |  | inf          | #DIV/0! |
| SFMBT2  | 0.09523809524 | 0.09523809524 | 0.1111111111  |  | 0.6842105263 | #DIV/0! |
| SFN     | 0.04761904762 | 0.04761904762 | 0.1111111111  |  | 0.325        | #DIV/0! |
| SFPQ    | 0.04761904762 | 0.04761904762 | 0.05555555556 |  | 0.7          | #DIV/0! |
| SFR1    | 0.1428571429  | 0.1428571429  | 0.05555555556 |  | 2.333333333  | #DIV/0! |
| SFRP1   | 0.09523809524 | 0.09523809524 | 0.1666666667  |  | 0.4210526316 | #DIV/0! |
| SFRP2   | 0             | 0             | 0.05555555556 |  | 0            | #DIV/0! |
| SFRP4   | 0.04761904762 | 0.04761904762 | 0.2222222222  |  | 0.1375       | #DIV/0! |
| SFRP5   | 0.1428571429  | 0.1428571429  | 0             |  | inf          | #DIV/0! |
| SFSWA1  | 0.09523809524 | 0.09523809524 | 0.05555555556 |  | 1.473684211  | #DIV/0! |
| SFT2D2  | 0.1428571429  | 0.1428571429  | 0             |  | inf          | #DIV/0! |
| SFT2D3  | 0             | 0             | 0.05555555556 |  | 0            | #DIV/0! |
| SFTA1P  | 0.09523809524 | 0.09523809524 | 0.1111111111  |  | 0.6842105263 | #DIV/0! |
| SFTPA1  | 0.1428571429  | 0.1428571429  | 0.05555555556 |  | 2.333333333  | #DIV/0! |
| SFTPA2  | 0.1428571429  | 0.1428571429  | 0.05555555556 |  | 2.333333333  | #DIV/0! |
| SFTPB   | 0             | 0             | 0.05555555556 |  | 0            | #DIV/0! |
| SFTPC   | 0.09523809524 | 0.09523809524 | 0.1111111111  |  | 0.6842105263 | #DIV/0! |
| SFTPD   | 0.1428571429  | 0.1428571429  | 0             |  | inf          | #DIV/0! |

|         |               |               |               |  |              |         |
|---------|---------------|---------------|---------------|--|--------------|---------|
| SFXN1   | 0             | 0             | 0.05555555556 |  | 0            | #DIV/0! |
| SFXN2   | 0.1428571429  | 0.1428571429  | 0.05555555556 |  | 2.333333333  | #DIV/0! |
| SFXN3   | 0.1428571429  | 0.1428571429  | 0             |  | inf          | #DIV/0! |
| SFXN4   | 0.2380952381  | 0.2380952381  | 0             |  | inf          | #DIV/0! |
| SFXN5   | 0             | 0             | 0.05555555556 |  | 0            | #DIV/0! |
| SGCA    | 0.09523809524 | 0.09523809524 | 0             |  | inf          | #DIV/0! |
| SGCB    | 0.2380952381  | 0.2380952381  | 0.05555555556 |  | 4.375        | #DIV/0! |
| SGCD    | 0.04761904762 | 0.04761904762 | 0.05555555556 |  | 0.7          | #DIV/0! |
| SGCE    | 0.04761904762 | 0.04761904762 | 0.1111111111  |  | 0.325        | #DIV/0! |
| SGCZ    | 0.09523809524 | 0.09523809524 | 0.1111111111  |  | 0.6842105263 | #DIV/0! |
| SGF29   | 0.04761904762 | 0.04761904762 | 0             |  | inf          | #DIV/0! |
| SGIP1   | 0.04761904762 | 0.04761904762 | 0.05555555556 |  | 0.7          | #DIV/0! |
| SGK2    | 0.1428571429  | 0.1428571429  | 0.1111111111  |  | 1.083333333  | #DIV/0! |
| SGK3    | 0.1428571429  | 0.1428571429  | 0.1666666667  |  | 0.6666666667 | #DIV/0! |
| SGMS1   | 0.04761904762 | 0.04761904762 | 0.05555555556 |  | 0.7          | #DIV/0! |
| MS1-AS  | 0.04761904762 | 0.04761904762 | 0.05555555556 |  | 0.7          | #DIV/0! |
| SGMS2   | 0             | 0             | 0.05555555556 |  | 0            | #DIV/0! |
| SGO1    | 0.04761904762 | 0.04761904762 | 0             |  | inf          | #DIV/0! |
| GO1-AS  | 0.04761904762 | 0.04761904762 | 0             |  | inf          | #DIV/0! |
| SGO2    | 0             | 0             | 0.05555555556 |  | 0            | #DIV/0! |
| SGPL1   | 0.09523809524 | 0.09523809524 | 0             |  | inf          | #DIV/0! |
| SGPP1   | 0.09523809524 | 0.09523809524 | 0             |  | inf          | #DIV/0! |
| SGPP2   | 0             | 0             | 0.05555555556 |  | 0            | #DIV/0! |
| SGSH    | 0.04761904762 | 0.04761904762 | 0             |  | inf          | #DIV/0! |
| SGSM1   | 0.04761904762 | 0.04761904762 | 0.05555555556 |  | 0.7          | #DIV/0! |
| SGSM2   | 0             | 0             | 0.1111111111  |  | 0            | #DIV/0! |
| SGSM3   | 0             | 0             | 0.1111111111  |  | 0            | #DIV/0! |
| SGTA    | 0.09523809524 | 0.09523809524 | 0.05555555556 |  | 1.473684211  | #DIV/0! |
| SGTB    | 0.04761904762 | 0.04761904762 | 0             |  | inf          | #DIV/0! |
| SH2B1   | 0.04761904762 | 0.04761904762 | 0             |  | inf          | #DIV/0! |
| SH2B2   | 0.04761904762 | 0.04761904762 | 0.05555555556 |  | 0.7          | #DIV/0! |
| SH2B3   | 0             | 0             | 0.1111111111  |  | 0            | #DIV/0! |
| SH2D1B  | 0.1428571429  | 0.1428571429  | 0             |  | inf          | #DIV/0! |
| SH2D2A  | 0.1428571429  | 0.1428571429  | 0.05555555556 |  | 2.333333333  | #DIV/0! |
| SH2D3A  | 0.1428571429  | 0.1428571429  | 0.05555555556 |  | 2.333333333  | #DIV/0! |
| SH2D3C  | 0.09523809524 | 0.09523809524 | 0.05555555556 |  | 1.473684211  | #DIV/0! |
| SH2D4A  | 0.09523809524 | 0.09523809524 | 0.1111111111  |  | 0.6842105263 | #DIV/0! |
| SH2D4B  | 0.1428571429  | 0.1428571429  | 0             |  | inf          | #DIV/0! |
| SH2D5   | 0.04761904762 | 0.04761904762 | 0.1111111111  |  | 0.325        | #DIV/0! |
| SH2D6   | 0             | 0             | 0.05555555556 |  | 0            | #DIV/0! |
| SH2D7   | 0.04761904762 | 0.04761904762 | 0.05555555556 |  | 0.7          | #DIV/0! |
| SH3BGR  | 0.04761904762 | 0.04761904762 | 0.05555555556 |  | 0.7          | #DIV/0! |
| H3BGR1  | 0.04761904762 | 0.04761904762 | 0.1111111111  |  | 0.325        | #DIV/0! |
| SH3BP1  | 0             | 0             | 0.1111111111  |  | 0            | #DIV/0! |
| SH3BP2  | 0.04761904762 | 0.04761904762 | 0             |  | inf          | #DIV/0! |
| SH3BP4  | 0             | 0             | 0.05555555556 |  | 0            | #DIV/0! |
| SH3BP5  | 0.04761904762 | 0.04761904762 | 0             |  | inf          | #DIV/0! |
| I3BP5-A | 0.04761904762 | 0.04761904762 | 0             |  | inf          | #DIV/0! |
| H3BP5I  | 0.1428571429  | 0.1428571429  | 0             |  | inf          | #DIV/0! |
| SH3D19  | 0             | 0             | 0.05555555556 |  | 0            | #DIV/0! |
| SH3D21  | 0.04761904762 | 0.04761904762 | 0.05555555556 |  | 0.7          | #DIV/0! |

|         |               |               |              |  |              |         |
|---------|---------------|---------------|--------------|--|--------------|---------|
| I3PXD2  | 0.1428571429  | 0.1428571429  | 0.1111111111 |  | 1.083333333  | #DIV/0! |
| PXD2A-  | 0.1428571429  | 0.1428571429  | 0.1111111111 |  | 1.083333333  | #DIV/0! |
| H3PXD2  | 0             | 0             | 0.0555555556 |  | 0            | #DIV/0! |
| SH3RF1  | 0             | 0             | 0.0555555556 |  | 0            | #DIV/0! |
| SH3RF3  | 0             | 0             | 0.0555555556 |  | 0            | #DIV/0! |
| I3RF3-A | 0             | 0             | 0.0555555556 |  | 0            | #DIV/0! |
| SH3YL1  | 0             | 0             | 0.0555555556 |  | 0            | #DIV/0! |
| SHANK1  | 0.09523809524 | 0.09523809524 | 0.0555555556 |  | 1.473684211  | #DIV/0! |
| SHANK3  | 0             | 0             | 0.1111111111 |  | 0            | #DIV/0! |
| HARPI   | 0.04761904762 | 0.04761904762 | 0.1666666667 |  | 0.2          | #DIV/0! |
| SHB     | 0.04761904762 | 0.04761904762 | 0.0555555556 |  | 0.7          | #DIV/0! |
| SHBG    | 0             | 0             | 0.0555555556 |  | 0            | #DIV/0! |
| SHC1    | 0.1904761905  | 0.1904761905  | 0.1111111111 |  | 1.529411765  | #DIV/0! |
| SHC2    | 0.09523809524 | 0.09523809524 | 0.1111111111 |  | 0.6842105263 | #DIV/0! |
| SHC3    | 0             | 0             | 0.0555555556 |  | 0            | #DIV/0! |
| SHC4    | 0.04761904762 | 0.04761904762 | 0.0555555556 |  | 0.7          | #DIV/0! |
| SHCBP1  | 0.04761904762 | 0.04761904762 | 0            |  | inf          | #DIV/0! |
| HCBP1   | 0.1428571429  | 0.1428571429  | 0            |  | inf          | #DIV/0! |
| SHD     | 0.09523809524 | 0.09523809524 | 0.0555555556 |  | 1.473684211  | #DIV/0! |
| SHE     | 0.1904761905  | 0.1904761905  | 0.0555555556 |  | 3.294117647  | #DIV/0! |
| SHF     | 0.04761904762 | 0.04761904762 | 0            |  | inf          | #DIV/0! |
| SHH     | 0.1428571429  | 0.1428571429  | 0.0555555556 |  | 2.333333333  | #DIV/0! |
| SHISA4  | 0.1428571429  | 0.1428571429  | 0            |  | inf          | #DIV/0! |
| SHISA5  | 0.09523809524 | 0.09523809524 | 0            |  | inf          | #DIV/0! |
| SHISA6  | 0.04761904762 | 0.04761904762 | 0.0555555556 |  | 0.7          | #DIV/0! |
| SHISA7  | 0.09523809524 | 0.09523809524 | 0.0555555556 |  | 1.473684211  | #DIV/0! |
| SHISA8  | 0             | 0             | 0.1111111111 |  | 0            | #DIV/0! |
| SHISA9  | 0.04761904762 | 0.04761904762 | 0            |  | inf          | #DIV/0! |
| SHISAL1 | 0             | 0             | 0.1666666667 |  | 0            | #DIV/0! |
| HISAL2  | 0.04761904762 | 0.04761904762 | 0.0555555556 |  | 0.7          | #DIV/0! |
| HISAL2  | 0.04761904762 | 0.04761904762 | 0            |  | inf          | #DIV/0! |
| SHKBPI  | 0.04761904762 | 0.04761904762 | 0.0555555556 |  | 0.7          | #DIV/0! |
| SHLD1   | 0.1904761905  | 0.1904761905  | 0.0555555556 |  | 3.294117647  | #DIV/0! |
| SHLD2   | 0.1428571429  | 0.1428571429  | 0.0555555556 |  | 2.333333333  | #DIV/0! |
| HLD2P   | 0.1428571429  | 0.1428571429  | 0.0555555556 |  | 2.333333333  | #DIV/0! |
| HLD2P   | 0.1428571429  | 0.1428571429  | 0.0555555556 |  | 2.333333333  | #DIV/0! |
| SHLD3   | 0.04761904762 | 0.04761904762 | 0            |  | inf          | #DIV/0! |
| SHMT1   | 0.04761904762 | 0.04761904762 | 0.1111111111 |  | 0.325        | #DIV/0! |
| SHMT2   | 0.1428571429  | 0.1428571429  | 0.0555555556 |  | 2.333333333  | #DIV/0! |
| SHOC1   | 0.04761904762 | 0.04761904762 | 0.0555555556 |  | 0.7          | #DIV/0! |
| SHOC2   | 0.1428571429  | 0.1428571429  | 0.0555555556 |  | 2.333333333  | #DIV/0! |
| SHOX2   | 0.1428571429  | 0.1428571429  | 0.0555555556 |  | 2.333333333  | #DIV/0! |
| SHPK    | 0             | 0             | 0.1111111111 |  | 0            | #DIV/0! |
| SHQ1    | 0.04761904762 | 0.04761904762 | 0            |  | inf          | #DIV/0! |
| HROOM   | 0.04761904762 | 0.04761904762 | 0            |  | inf          | #DIV/0! |
| HROOM   | 0.04761904762 | 0.04761904762 | 0.0555555556 |  | 0.7          | #DIV/0! |
| SHTN1   | 0.2380952381  | 0.2380952381  | 0            |  | inf          | #DIV/0! |
| SI      | 0.1428571429  | 0.1428571429  | 0.0555555556 |  | 2.333333333  | #DIV/0! |
| SIAH1   | 0.04761904762 | 0.04761904762 | 0            |  | inf          | #DIV/0! |
| SIAH2   | 0.1904761905  | 0.1904761905  | 0.1111111111 |  | 1.529411765  | #DIV/0! |
| SIDT1   | 0.09523809524 | 0.09523809524 | 0.0555555556 |  | 1.473684211  | #DIV/0! |



|                |               |               |               |  |              |         |
|----------------|---------------|---------------|---------------|--|--------------|---------|
| <b>SIGIRR</b>  | 0.04761904762 | 0.04761904762 | 0             |  | inf          | #DIV/0! |
| <b>IGMAR</b>   | 0.09523809524 | 0.09523809524 | 0.05555555556 |  | 1.473684211  | #DIV/0! |
| <b>SIK1</b>    | 0.04761904762 | 0.04761904762 | 0.16666666667 |  | 0.2          | #DIV/0! |
| <b>SIK1B</b>   | 0.04761904762 | 0.04761904762 | 0.16666666667 |  | 0.2          | #DIV/0! |
| <b>SIKE1</b>   | 0.04761904762 | 0.04761904762 | 0.05555555556 |  | 0.7          | #DIV/0! |
| <b>SIL1</b>    | 0.04761904762 | 0.04761904762 | 0             |  | inf          | #DIV/0! |
| <b>SILC1</b>   | 0             | 0             | 0.05555555556 |  | 0            | #DIV/0! |
| <b>SIM2</b>    | 0.04761904762 | 0.04761904762 | 0.16666666667 |  | 0.2          | #DIV/0! |
| <b>SIMC1</b>   | 0.09523809524 | 0.09523809524 | 0.05555555556 |  | 1.473684211  | #DIV/0! |
| <b>SIN3A</b>   | 0.04761904762 | 0.04761904762 | 0.05555555556 |  | 0.7          | #DIV/0! |
| <b>SIN3B</b>   | 0.1428571429  | 0.1428571429  | 0.11111111111 |  | 1.083333333  | #DIV/0! |
| <b>INHCAI</b>  | 0.1428571429  | 0.1428571429  | 0.11111111111 |  | 1.083333333  | #DIV/0! |
| <b>SIPA1L2</b> | 0.1428571429  | 0.1428571429  | 0             |  | inf          | #DIV/0! |
| <b>SIPA1L3</b> | 0.04761904762 | 0.04761904762 | 0.05555555556 |  | 0.7          | #DIV/0! |
| <b>SIRLNT</b>  | 0.09523809524 | 0.09523809524 | 0.11111111111 |  | 0.6842105263 | #DIV/0! |
| <b>SIRPA</b>   | 0.1904761905  | 0.1904761905  | 0.11111111111 |  | 1.529411765  | #DIV/0! |
| <b>SIRPB1</b>  | 0.1904761905  | 0.1904761905  | 0.11111111111 |  | 1.529411765  | #DIV/0! |
| <b>SIRPB2</b>  | 0.1904761905  | 0.1904761905  | 0.11111111111 |  | 1.529411765  | #DIV/0! |
| <b>SIRPD</b>   | 0.1904761905  | 0.1904761905  | 0.11111111111 |  | 1.529411765  | #DIV/0! |
| <b>SIRPG</b>   | 0.1904761905  | 0.1904761905  | 0.11111111111 |  | 1.529411765  | #DIV/0! |
| <b>RPG-AS</b>  | 0.1904761905  | 0.1904761905  | 0.11111111111 |  | 1.529411765  | #DIV/0! |
| <b>SIRT1</b>   | 0.1904761905  | 0.1904761905  | 0.05555555556 |  | 3.294117647  | #DIV/0! |
| <b>SIRT2</b>   | 0.04761904762 | 0.04761904762 | 0.05555555556 |  | 0.7          | #DIV/0! |
| <b>SIRT3</b>   | 0.04761904762 | 0.04761904762 | 0             |  | inf          | #DIV/0! |
| <b>SIRT4</b>   | 0             | 0             | 0.11111111111 |  | 0            | #DIV/0! |
| <b>SIRT6</b>   | 0.09523809524 | 0.09523809524 | 0.05555555556 |  | 1.473684211  | #DIV/0! |
| <b>SIRT7</b>   | 0.04761904762 | 0.04761904762 | 0             |  | inf          | #DIV/0! |
| <b>SIT1</b>    | 0.09523809524 | 0.09523809524 | 0.05555555556 |  | 1.473684211  | #DIV/0! |
| <b>SIX2</b>    | 0             | 0             | 0.05555555556 |  | 0            | #DIV/0! |
| <b>SIX3</b>    | 0             | 0             | 0.05555555556 |  | 0            | #DIV/0! |
| <b>IX3-AS</b>  | 0             | 0             | 0.05555555556 |  | 0            | #DIV/0! |
| <b>SIX5</b>    | 0.09523809524 | 0.09523809524 | 0.11111111111 |  | 0.6842105263 | #DIV/0! |
| <b>SKA1</b>    | 0.04761904762 | 0.04761904762 | 0             |  | inf          | #DIV/0! |
| <b>SKA2</b>    | 0.1428571429  | 0.1428571429  | 0             |  | inf          | #DIV/0! |
| <b>SKA3</b>    | 0.04761904762 | 0.04761904762 | 0             |  | inf          | #DIV/0! |
| <b>SKAP1</b>   | 0.1428571429  | 0.1428571429  | 0             |  | inf          | #DIV/0! |
| <b>SKAP2</b>   | 0.04761904762 | 0.04761904762 | 0.22222222222 |  | 0.1375       | #DIV/0! |
| <b>SKI</b>     | 0             | 0             | 0.11111111111 |  | 0            | #DIV/0! |
| <b>SKIDA1</b>  | 0.09523809524 | 0.09523809524 | 0.11111111111 |  | 0.6842105263 | #DIV/0! |
| <b>SKIL</b>    | 0.1904761905  | 0.1904761905  | 0.05555555556 |  | 3.294117647  | #DIV/0! |
| <b>KINT1I</b>  | 0             | 0             | 0.05555555556 |  | 0            | #DIV/0! |
| <b>SKIV2L</b>  | 0.04761904762 | 0.04761904762 | 0             |  | inf          | #DIV/0! |
| <b>SKOR1</b>   | 0.04761904762 | 0.04761904762 | 0.05555555556 |  | 0.7          | #DIV/0! |
| <b>SKOR2</b>   | 0.04761904762 | 0.04761904762 | 0.05555555556 |  | 0.7          | #DIV/0! |
| <b>SKP1</b>    | 0.04761904762 | 0.04761904762 | 0             |  | inf          | #DIV/0! |
| <b>SKPIP2</b>  | 0.04761904762 | 0.04761904762 | 0.11111111111 |  | 0.325        | #DIV/0! |
| <b>SKP2</b>    | 0.04761904762 | 0.04761904762 | 0.05555555556 |  | 0.7          | #DIV/0! |
| <b>SLA</b>     | 0.04761904762 | 0.04761904762 | 0.22222222222 |  | 0.1375       | #DIV/0! |
| <b>SLA2</b>    | 0.09523809524 | 0.09523809524 | 0.11111111111 |  | 0.6842105263 | #DIV/0! |
| <b>SLAIN2</b>  | 0.04761904762 | 0.04761904762 | 0.11111111111 |  | 0.325        | #DIV/0! |
| <b>SLAMF1</b>  | 0.1428571429  | 0.1428571429  | 0             |  | inf          | #DIV/0! |

|            |               |               |               |  |              |         |
|------------|---------------|---------------|---------------|--|--------------|---------|
| \$LAMF6    | 0.1428571429  | 0.1428571429  | 0             |  | inf          | #DIV/0! |
| \$LAMF7    | 0.1428571429  | 0.1428571429  | 0             |  | inf          | #DIV/0! |
| \$LAMF8    | 0.1428571429  | 0.1428571429  | 0             |  | inf          | #DIV/0! |
| \$LAMF9    | 0.1428571429  | 0.1428571429  | 0             |  | inf          | #DIV/0! |
| \$LBP      | 0.04761904762 | 0.04761904762 | 0             |  | inf          | #DIV/0! |
| \$LC10A4   | 0.04761904762 | 0.04761904762 | 0.1111111111  |  | 0.325        | #DIV/0! |
| \$LC10A5   | 0.1428571429  | 0.1428571429  | 0.1111111111  |  | 1.083333333  | #DIV/0! |
| \$LC10A6   | 0             | 0             | 0.05555555556 |  | 0            | #DIV/0! |
| \$LC10A7   | 0             | 0             | 0.05555555556 |  | 0            | #DIV/0! |
| \$LC11A    | 0             | 0             | 0.05555555556 |  | 0            | #DIV/0! |
| \$LC11A0   | 0.09523809524 | 0.09523809524 | 0.05555555556 |  | 1.473684211  | #DIV/0! |
| \$LC12A10  | 0.04761904762 | 0.04761904762 | 0.05555555556 |  | 0.7          | #DIV/0! |
| \$LC12A20  | 0.04761904762 | 0.04761904762 | 0             |  | inf          | #DIV/0! |
| \$LC12A30  | 0.04761904762 | 0.04761904762 | 0             |  | inf          | #DIV/0! |
| \$LC12A40  | 0.1428571429  | 0.1428571429  | 0.05555555556 |  | 2.333333333  | #DIV/0! |
| \$LC12A50  | 0.1428571429  | 0.1428571429  | 0.1666666667  |  | 0.6666666667 | #DIV/0! |
| \$C12A5-A  | 0.1428571429  | 0.1428571429  | 0.1666666667  |  | 0.6666666667 | #DIV/0! |
| \$LC12A7   | 0             | 0             | 0.05555555556 |  | 0            | #DIV/0! |
| \$LC12A80  | 0.04761904762 | 0.04761904762 | 0.05555555556 |  | 0.7          | #DIV/0! |
| \$LC12A90  | 0.04761904762 | 0.04761904762 | 0.05555555556 |  | 0.7          | #DIV/0! |
| \$C12A9-A0 | 0.04761904762 | 0.04761904762 | 0.05555555556 |  | 0.7          | #DIV/0! |
| \$LC13A10  | 0.04761904762 | 0.04761904762 | 0.05555555556 |  | 0.7          | #DIV/0! |
| \$LC13A20  | 0.04761904762 | 0.04761904762 | 0.05555555556 |  | 0.7          | #DIV/0! |
| \$LC13A30  | 0.1428571429  | 0.1428571429  | 0.1666666667  |  | 0.6666666667 | #DIV/0! |
| \$LC13A40  | 0.04761904762 | 0.04761904762 | 0.05555555556 |  | 0.7          | #DIV/0! |
| \$LC13A5   | 0             | 0             | 0.05555555556 |  | 0            | #DIV/0! |
| \$LC14A10  | 0.04761904762 | 0.04761904762 | 0.05555555556 |  | 0.7          | #DIV/0! |
| \$LC14A20  | 0.04761904762 | 0.04761904762 | 0.05555555556 |  | 0.7          | #DIV/0! |
| \$C14A2-A0 | 0.04761904762 | 0.04761904762 | 0             |  | inf          | #DIV/0! |
| \$LC15A20  | 0.09523809524 | 0.09523809524 | 0.05555555556 |  | 1.473684211  | #DIV/0! |
| \$LC15A40  | 0.09523809524 | 0.09523809524 | 0.05555555556 |  | 1.473684211  | #DIV/0! |
| \$LC15A50  | 0.04761904762 | 0.04761904762 | 0.1111111111  |  | 0.325        | #DIV/0! |
| \$LC16A10  | 0.04761904762 | 0.04761904762 | 0.05555555556 |  | 0.7          | #DIV/0! |
| \$C16A1-A0 | 0.04761904762 | 0.04761904762 | 0.05555555556 |  | 0.7          | #DIV/0! |
| \$LC16A1   | 0             | 0             | 0             |  |              | #DIV/0! |
| \$LC16A1   | 0             | 0             | 0.05555555556 |  | 0            | #DIV/0! |
| \$LC16A1   | 0.1428571429  | 0.1428571429  | 0.1111111111  |  | 1.083333333  | #DIV/0! |
| \$C16A12-  | 0.1428571429  | 0.1428571429  | 0.1111111111  |  | 1.083333333  | #DIV/0! |
| \$LC16A1   | 0             | 0             | 0.05555555556 |  | 0            | #DIV/0! |
| \$LC16A1   | 0             | 0             | 0.05555555556 |  | 0            | #DIV/0! |
| \$LC16A30  | 0.04761904762 | 0.04761904762 | 0             |  | inf          | #DIV/0! |
| \$LC16A40  | 0.04761904762 | 0.04761904762 | 0             |  | inf          | #DIV/0! |
| \$LC16A50  | 0.04761904762 | 0.04761904762 | 0.05555555556 |  | 0.7          | #DIV/0! |
| \$LC16A6   | 0             | 0             | 0             |  |              | #DIV/0! |
| \$LC16A70  | 0.09523809524 | 0.09523809524 | 0             |  | inf          | #DIV/0! |
| \$LC16A80  | 0.04761904762 | 0.04761904762 | 0.1111111111  |  | 0.325        | #DIV/0! |
| \$LC16A90  | 0.04761904762 | 0.04761904762 | 0.05555555556 |  | 0.7          | #DIV/0! |
| \$LC17A50  | 0.04761904762 | 0.04761904762 | 0             |  | inf          | #DIV/0! |
| \$LC17A70  | 0.09523809524 | 0.09523809524 | 0.1111111111  |  | 0.6842105263 | #DIV/0! |
| \$LC17A80  | 0.04761904762 | 0.04761904762 | 0.05555555556 |  | 0.7          | #DIV/0! |
| \$LC17A90  | 0.1428571429  | 0.1428571429  | 0.2222222222  |  | 0.4583333333 | #DIV/0! |

|         |               |               |               |  |              |         |
|---------|---------------|---------------|---------------|--|--------------|---------|
| SLC18A1 | 0.09523809524 | 0.09523809524 | 0.1111111111  |  | 0.6842105263 | #DIV/0! |
| SLC18A2 | 0.2380952381  | 0.2380952381  | 0             |  | inf          | #DIV/0! |
| SLC18A3 | 0.09523809524 | 0.09523809524 | 0.05555555556 |  | 1.473684211  | #DIV/0! |
| SLC19A1 | 0.04761904762 | 0.04761904762 | 0.1111111111  |  | 0.325        | #DIV/0! |
| SLC19A2 | 0.1428571429  | 0.1428571429  | 0             |  | inf          | #DIV/0! |
| SLC19A3 | 0             | 0             | 0.05555555556 |  | 0            | #DIV/0! |
| SLC1A1  | 0.04761904762 | 0.04761904762 | 0.05555555556 |  | 0.7          | #DIV/0! |
| SLC1A3  | 0.04761904762 | 0.04761904762 | 0.05555555556 |  | 0.7          | #DIV/0! |
| SLC1A4  | 0             | 0             | 0.05555555556 |  | 0            | #DIV/0! |
| SLC1A5  | 0.09523809524 | 0.09523809524 | 0.1111111111  |  | 0.6842105263 | #DIV/0! |
| SLC1A6  | 0.1428571429  | 0.1428571429  | 0.1111111111  |  | 1.083333333  | #DIV/0! |
| SLC1A7  | 0.04761904762 | 0.04761904762 | 0.05555555556 |  | 0.7          | #DIV/0! |
| SLC20A1 | 0             | 0             | 0.05555555556 |  | 0            | #DIV/0! |
| SLC20A2 | 0.09523809524 | 0.09523809524 | 0.1666666667  |  | 0.4210526316 | #DIV/0! |
| LC22A1  | 0.04761904762 | 0.04761904762 | 0             |  | inf          | #DIV/0! |
| LC22A1  | 0.04761904762 | 0.04761904762 | 0             |  | inf          | #DIV/0! |
| LC22A1  | 0.04761904762 | 0.04761904762 | 0.05555555556 |  | 0.7          | #DIV/0! |
| LC22A1  | 0             | 0             | 0             |  |              | #DIV/0! |
| LC22A1  | 0             | 0             | 0.05555555556 |  | 0            | #DIV/0! |
| LC22A1  | 0.04761904762 | 0.04761904762 | 0             |  | inf          | #DIV/0! |
| C22A18  | 0.04761904762 | 0.04761904762 | 0             |  | inf          | #DIV/0! |
| LC22A3  | 0.09523809524 | 0.09523809524 | 0             |  | inf          | #DIV/0! |
| SLC22A4 | 0.04761904762 | 0.04761904762 | 0             |  | inf          | #DIV/0! |
| SLC22A5 | 0.04761904762 | 0.04761904762 | 0             |  | inf          | #DIV/0! |
| SLC22A7 | 0.04761904762 | 0.04761904762 | 0.05555555556 |  | 0.7          | #DIV/0! |
| SLC23A1 | 0.04761904762 | 0.04761904762 | 0             |  | inf          | #DIV/0! |
| SLC23A2 | 0.1904761905  | 0.1904761905  | 0.05555555556 |  | 3.294117647  | #DIV/0! |
| SLC24A1 | 0.04761904762 | 0.04761904762 | 0.05555555556 |  | 0.7          | #DIV/0! |
| SLC24A2 | 0.04761904762 | 0.04761904762 | 0.05555555556 |  | 0.7          | #DIV/0! |
| SLC24A3 | 0.1904761905  | 0.1904761905  | 0.05555555556 |  | 3.294117647  | #DIV/0! |
| SLC24A5 | 0.04761904762 | 0.04761904762 | 0.05555555556 |  | 0.7          | #DIV/0! |
| SLC25A1 | 0.04761904762 | 0.04761904762 | 0.05555555556 |  | 0.7          | #DIV/0! |
| LC25A1  | 0.04761904762 | 0.04761904762 | 0             |  | inf          | #DIV/0! |
| LC25A1  | 0             | 0             | 0.1111111111  |  | 0            | #DIV/0! |
| LC25A1  | 0             | 0             | 0.05555555556 |  | 0            | #DIV/0! |
| LC25A1  | 0.04761904762 | 0.04761904762 | 0.1111111111  |  | 0.325        | #DIV/0! |
| LC25A1  | 0.1904761905  | 0.1904761905  | 0.05555555556 |  | 3.294117647  | #DIV/0! |
| LC25A1  | 0             | 0             | 0.1111111111  |  | 0            | #DIV/0! |
| LC25A1  | 0.04761904762 | 0.04761904762 | 0             |  | inf          | #DIV/0! |
| LC25A1  | 0.04761904762 | 0.04761904762 | 0.05555555556 |  | 0.7          | #DIV/0! |
| SLC25A2 | 0.04761904762 | 0.04761904762 | 0             |  | inf          | #DIV/0! |
| LC25A2  | 0.09523809524 | 0.09523809524 | 0             |  | inf          | #DIV/0! |
| LC25A2  | 0.04761904762 | 0.04761904762 | 0             |  | inf          | #DIV/0! |
| LC25A2  | 0.1428571429  | 0.1428571429  | 0.05555555556 |  | 2.333333333  | #DIV/0! |
| LC25A2  | 0.04761904762 | 0.04761904762 | 0.05555555556 |  | 0.7          | #DIV/0! |
| LC25A2  | 0.09523809524 | 0.09523809524 | 0.05555555556 |  | 1.473684211  | #DIV/0! |
| LC25A25 | 0.09523809524 | 0.09523809524 | 0.05555555556 |  | 1.473684211  | #DIV/0! |
| LC25A2  | 0.04761904762 | 0.04761904762 | 0             |  | inf          | #DIV/0! |
| LC25A2  | 0.04761904762 | 0.04761904762 | 0.05555555556 |  | 0.7          | #DIV/0! |
| LC25A2  | 0.1428571429  | 0.1428571429  | 0             |  | inf          | #DIV/0! |
| SLC25A3 | 0.04761904762 | 0.04761904762 | 0.05555555556 |  | 0.7          | #DIV/0! |

|        |               |               |               |  |              |         |
|--------|---------------|---------------|---------------|--|--------------|---------|
| LC25A3 | 0             | 0             | 0.05555555556 |  | 0            | #DIV/0! |
| LC25A3 | 0.1904761905  | 0.1904761905  | 0.1111111111  |  | 1.529411765  | #DIV/0! |
| LC25A3 | 0             | 0             | 0.05555555556 |  | 0            | #DIV/0! |
| LC25A3 | 0.04761904762 | 0.04761904762 | 0.1111111111  |  | 0.325        | #DIV/0! |
| LC25A3 | 0.04761904762 | 0.04761904762 | 0.1111111111  |  | 0.325        | #DIV/0! |
| LC25A3 | 0.04761904762 | 0.04761904762 | 0.05555555556 |  | 0.7          | #DIV/0! |
| LC25A3 | 0.1428571429  | 0.1428571429  | 0.05555555556 |  | 2.333333333  | #DIV/0! |
| LC25A3 | 0.04761904762 | 0.04761904762 | 0.1111111111  |  | 0.325        | #DIV/0! |
| LC25A3 | 0.04761904762 | 0.04761904762 | 0             |  | inf          | #DIV/0! |
| LC25A3 | 0.09523809524 | 0.09523809524 | 0             |  | inf          | #DIV/0! |
| LC25A3 | 0.04761904762 | 0.04761904762 | 0.05555555556 |  | 0.7          | #DIV/0! |
| LC25A4 | 0             | 0             | 0.05555555556 |  | 0            | #DIV/0! |
| LC25A4 | 0.09523809524 | 0.09523809524 | 0.05555555556 |  | 1.473684211  | #DIV/0! |
| LC25A4 | 0.1428571429  | 0.1428571429  | 0.05555555556 |  | 2.333333333  | #DIV/0! |
| LC25A4 | 0.1428571429  | 0.1428571429  | 0.1111111111  |  | 1.083333333  | #DIV/0! |
| LC25A4 | 0.04761904762 | 0.04761904762 | 0             |  | inf          | #DIV/0! |
| LC25A4 | 0.04761904762 | 0.04761904762 | 0             |  | inf          | #DIV/0! |
| LC25A5 | 0.04761904762 | 0.04761904762 | 0.05555555556 |  | 0.7          | #DIV/0! |
| LC25A5 | 0.09523809524 | 0.09523809524 | 0             |  | inf          | #DIV/0! |
| LC26A1 | 0.04761904762 | 0.04761904762 | 0             |  | inf          | #DIV/0! |
| LC26A1 | 0.1428571429  | 0.1428571429  | 0.05555555556 |  | 2.333333333  | #DIV/0! |
| LC26A1 | 0.04761904762 | 0.04761904762 | 0             |  | inf          | #DIV/0! |
| LC26A3 | 0.04761904762 | 0.04761904762 | 0.05555555556 |  | 0.7          | #DIV/0! |
| LC26A4 | 0.04761904762 | 0.04761904762 | 0.05555555556 |  | 0.7          | #DIV/0! |
| LC26A4 | 0.04761904762 | 0.04761904762 | 0.05555555556 |  | 0.7          | #DIV/0! |
| LC26A5 | 0.04761904762 | 0.04761904762 | 0.05555555556 |  | 0.7          | #DIV/0! |
| LC26A6 | 0.09523809524 | 0.09523809524 | 0             |  | inf          | #DIV/0! |
| LC26A7 | 0.1904761905  | 0.1904761905  | 0.1111111111  |  | 1.529411765  | #DIV/0! |
| LC26A8 | 0.04761904762 | 0.04761904762 | 0.05555555556 |  | 0.7          | #DIV/0! |
| LC26A9 | 0.1428571429  | 0.1428571429  | 0             |  | inf          | #DIV/0! |
| LC27A2 | 0.1428571429  | 0.1428571429  | 0.05555555556 |  | 2.333333333  | #DIV/0! |
| LC27A3 | 0.1904761905  | 0.1904761905  | 0.05555555556 |  | 3.294117647  | #DIV/0! |
| LC27A4 | 0.09523809524 | 0.09523809524 | 0.05555555556 |  | 1.473684211  | #DIV/0! |
| LC27A5 | 0.1428571429  | 0.1428571429  | 0.05555555556 |  | 2.333333333  | #DIV/0! |
| LC27A6 | 0.04761904762 | 0.04761904762 | 0             |  | inf          | #DIV/0! |
| LC28A1 | 0.04761904762 | 0.04761904762 | 0.05555555556 |  | 0.7          | #DIV/0! |
| LC28A2 | 0.04761904762 | 0.04761904762 | 0             |  | inf          | #DIV/0! |
| LC28A3 | 0             | 0             | 0.05555555556 |  | 0            | #DIV/0! |
| LC29A1 | 0.04761904762 | 0.04761904762 | 0.05555555556 |  | 0.7          | #DIV/0! |
| LC29A3 | 0.09523809524 | 0.09523809524 | 0             |  | inf          | #DIV/0! |
| LC29A4 | 0.04761904762 | 0.04761904762 | 0.1666666667  |  | 0.2          | #DIV/0! |
| LC2A1  | 0.04761904762 | 0.04761904762 | 0.05555555556 |  | 0.7          | #DIV/0! |
| LC2A1  | 0.04761904762 | 0.04761904762 | 0.05555555556 |  | 0.7          | #DIV/0! |
| LC2A1  | 0.1428571429  | 0.1428571429  | 0.1666666667  |  | 0.6666666667 | #DIV/0! |
| LC2A1  | 0.04761904762 | 0.04761904762 | 0.1111111111  |  | 0.325        | #DIV/0! |
| LC2A1  | 0.04761904762 | 0.04761904762 | 0.05555555556 |  | 0.7          | #DIV/0! |
| LC2A1  | 0.04761904762 | 0.04761904762 | 0.1111111111  |  | 0.325        | #DIV/0! |
| LC2A2  | 0.1904761905  | 0.1904761905  | 0.05555555556 |  | 3.294117647  | #DIV/0! |
| LC2A3  | 0.04761904762 | 0.04761904762 | 0.1111111111  |  | 0.325        | #DIV/0! |
| LC2A4  | 0             | 0             | 0.05555555556 |  | 0            | #DIV/0! |
| LC2A4  | 0.1428571429  | 0.1428571429  | 0.2222222222  |  | 0.4583333333 | #DIV/0! |

|         |               |               |               |  |              |         |
|---------|---------------|---------------|---------------|--|--------------|---------|
| SLC2A5  | 0             | 0             | 0.05555555556 |  | 0            | #DIV/0! |
| SLC2A6  | 0.04761904762 | 0.04761904762 | 0             |  | inf          | #DIV/0! |
| SLC2A7  | 0             | 0             | 0.05555555556 |  | 0            | #DIV/0! |
| SLC2A8  | 0.09523809524 | 0.09523809524 | 0.05555555556 |  | 1.473684211  | #DIV/0! |
| SLC30A1 | 0.1428571429  | 0.1428571429  | 0             |  | inf          | #DIV/0! |
| LC30A1  | 0.1428571429  | 0.1428571429  | 0.05555555556 |  | 2.333333333  | #DIV/0! |
| SLC30A2 | 0.04761904762 | 0.04761904762 | 0.1111111111  |  | 0.325        | #DIV/0! |
| SLC30A4 | 0.04761904762 | 0.04761904762 | 0             |  | inf          | #DIV/0! |
| SLC30A5 | 0.04761904762 | 0.04761904762 | 0.05555555556 |  | 0.7          | #DIV/0! |
| SLC30A6 | 0.1428571429  | 0.1428571429  | 0             |  | inf          | #DIV/0! |
| SLC30A7 | 0.04761904762 | 0.04761904762 | 0.05555555556 |  | 0.7          | #DIV/0! |
| SLC30A8 | 0.1904761905  | 0.1904761905  | 0.1666666667  |  | 0.9411764706 | #DIV/0! |
| SLC30A9 | 0.04761904762 | 0.04761904762 | 0             |  | inf          | #DIV/0! |
| SLC31A0 | 0.04761904762 | 0.04761904762 | 0.05555555556 |  | 0.7          | #DIV/0! |
| SLC31A2 | 0.04761904762 | 0.04761904762 | 0.05555555556 |  | 0.7          | #DIV/0! |
| SLC32A1 | 0.1428571429  | 0.1428571429  | 0.2222222222  |  | 0.4583333333 | #DIV/0! |
| SLC33A1 | 0.1904761905  | 0.1904761905  | 0.05555555556 |  | 3.294117647  | #DIV/0! |
| SLC34A0 | 0.09523809524 | 0.09523809524 | 0.05555555556 |  | 1.473684211  | #DIV/0! |
| SLC34A3 | 0.1428571429  | 0.1428571429  | 0.05555555556 |  | 2.333333333  | #DIV/0! |
| SLC35A3 | 0.04761904762 | 0.04761904762 | 0.05555555556 |  | 0.7          | #DIV/0! |
| SLC35A4 | 0.04761904762 | 0.04761904762 | 0             |  | inf          | #DIV/0! |
| SLC35A5 | 0.09523809524 | 0.09523809524 | 0.05555555556 |  | 1.473684211  | #DIV/0! |
| SLC35B0 | 0.09523809524 | 0.09523809524 | 0             |  | inf          | #DIV/0! |
| SLC35B2 | 0.04761904762 | 0.04761904762 | 0.05555555556 |  | 0.7          | #DIV/0! |
| SLC35B4 | 0.04761904762 | 0.04761904762 | 0.05555555556 |  | 0.7          | #DIV/0! |
| SLC35C2 | 0.1428571429  | 0.1428571429  | 0.1666666667  |  | 0.6666666667 | #DIV/0! |
| SLC35D0 | 0.04761904762 | 0.04761904762 | 0.05555555556 |  | 0.7          | #DIV/0! |
| SLC35D2 | 0.04761904762 | 0.04761904762 | 0.05555555556 |  | 0.7          | #DIV/0! |
| SLC35E1 | 0.1428571429  | 0.1428571429  | 0.1111111111  |  | 1.083333333  | #DIV/0! |
| LC35E2  | 0             | 0             | 0.1111111111  |  | 0            | #DIV/0! |
| LC35E2  | 0             | 0             | 0.1111111111  |  | 0            | #DIV/0! |
| SLC35E3 | 0.09523809524 | 0.09523809524 | 0.05555555556 |  | 1.473684211  | #DIV/0! |
| SLC35E4 | 0.04761904762 | 0.04761904762 | 0.1111111111  |  | 0.325        | #DIV/0! |
| SLC35F3 | 0.1428571429  | 0.1428571429  | 0             |  | inf          | #DIV/0! |
| SLC35F4 | 0.04761904762 | 0.04761904762 | 0             |  | inf          | #DIV/0! |
| SLC35F5 | 0             | 0             | 0.05555555556 |  | 0            | #DIV/0! |
| SLC35G  | 0.1428571429  | 0.1428571429  | 0             |  | inf          | #DIV/0! |
| SLC35G2 | 0.1904761905  | 0.1904761905  | 0.05555555556 |  | 3.294117647  | #DIV/0! |
| SLC35G4 | 0.09523809524 | 0.09523809524 | 0             |  | inf          | #DIV/0! |
| SLC35G5 | 0.09523809524 | 0.09523809524 | 0.1111111111  |  | 0.6842105263 | #DIV/0! |
| SLC35G6 | 0             | 0             | 0.05555555556 |  | 0            | #DIV/0! |
| SLC37A1 | 0.04761904762 | 0.04761904762 | 0.1111111111  |  | 0.325        | #DIV/0! |
| SLC37A3 | 0.04761904762 | 0.04761904762 | 0.05555555556 |  | 0.7          | #DIV/0! |
| SLC38A0 | 0.04761904762 | 0.04761904762 | 0.05555555556 |  | 0.7          | #DIV/0! |
| LC38A1  | 0.04761904762 | 0.04761904762 | 0             |  | inf          | #DIV/0! |
| LC38A1  | 0             | 0             | 0.05555555556 |  | 0            | #DIV/0! |
| SLC38A2 | 0.04761904762 | 0.04761904762 | 0.05555555556 |  | 0.7          | #DIV/0! |
| SLC38A3 | 0.09523809524 | 0.09523809524 | 0             |  | inf          | #DIV/0! |
| SLC38A4 | 0.04761904762 | 0.04761904762 | 0.05555555556 |  | 0.7          | #DIV/0! |
| SLC38A7 | 0.04761904762 | 0.04761904762 | 0             |  | inf          | #DIV/0! |
| SLC38A8 | 0.04761904762 | 0.04761904762 | 0             |  | inf          | #DIV/0! |

|           |               |               |               |  |              |         |
|-----------|---------------|---------------|---------------|--|--------------|---------|
| SLC38A9   | 0.04761904762 | 0.04761904762 | 0.05555555556 |  | 0.7          | #DIV/0! |
| SLC39A1   | 0.1904761905  | 0.1904761905  | 0.05555555556 |  | 3.294117647  | #DIV/0! |
| LC39A1    | 0             | 0             | 0.05555555556 |  | 0            | #DIV/0! |
| LC39A1    | 0.04761904762 | 0.04761904762 | 0             |  | inf          | #DIV/0! |
| LC39A1    | 0.09523809524 | 0.09523809524 | 0.1111111111  |  | 0.6842105263 | #DIV/0! |
| LC39A12   | 0.09523809524 | 0.09523809524 | 0.1111111111  |  | 0.6842105263 | #DIV/0! |
| LC39A1    | 0             | 0             | 0.05555555556 |  | 0            | #DIV/0! |
| LC39A1    | 0.09523809524 | 0.09523809524 | 0.1111111111  |  | 0.6842105263 | #DIV/0! |
| SLC39A3   | 0.09523809524 | 0.09523809524 | 0.05555555556 |  | 1.473684211  | #DIV/0! |
| SLC39A4   | 0.04761904762 | 0.04761904762 | 0.1666666667  |  | 0.2          | #DIV/0! |
| SLC39A5   | 0.09523809524 | 0.09523809524 | 0.05555555556 |  | 1.473684211  | #DIV/0! |
| SLC39A6   | 0.04761904762 | 0.04761904762 | 0             |  | inf          | #DIV/0! |
| SLC39A7   | 0.04761904762 | 0.04761904762 | 0             |  | inf          | #DIV/0! |
| SLC39A8   | 0             | 0             | 0.05555555556 |  | 0            | #DIV/0! |
| SLC3A1    | 0             | 0             | 0.05555555556 |  | 0            | #DIV/0! |
| SLC40A1   | 0             | 0             | 0.1666666667  |  | 0            | #DIV/0! |
| SLC41A1   | 0.1428571429  | 0.1428571429  | 0             |  | inf          | #DIV/0! |
| SLC41A2   | 0.04761904762 | 0.04761904762 | 0.05555555556 |  | 0.7          | #DIV/0! |
| SLC41A3   | 0.04761904762 | 0.04761904762 | 0.05555555556 |  | 0.7          | #DIV/0! |
| SLC43A2   | 0             | 0             | 0.1111111111  |  | 0            | #DIV/0! |
| SLC44A1   | 0.04761904762 | 0.04761904762 | 0.05555555556 |  | 0.7          | #DIV/0! |
| SLC44A2   | 0.1428571429  | 0.1428571429  | 0.1111111111  |  | 1.083333333  | #DIV/0! |
| SLC44A3   | 0.04761904762 | 0.04761904762 | 0.05555555556 |  | 0.7          | #DIV/0! |
| SLC44A3-A | 0.04761904762 | 0.04761904762 | 0.05555555556 |  | 0.7          | #DIV/0! |
| SLC44A4   | 0.04761904762 | 0.04761904762 | 0             |  | inf          | #DIV/0! |
| SLC44A5   | 0.04761904762 | 0.04761904762 | 0.05555555556 |  | 0.7          | #DIV/0! |
| SLC45A1   | 0             | 0             | 0.05555555556 |  | 0            | #DIV/0! |
| SLC45A2   | 0.04761904762 | 0.04761904762 | 0.1111111111  |  | 0.325        | #DIV/0! |
| SLC45A3   | 0.1428571429  | 0.1428571429  | 0             |  | inf          | #DIV/0! |
| SLC45A4   | 0.04761904762 | 0.04761904762 | 0.2222222222  |  | 0.1375       | #DIV/0! |
| SLC46A1   | 0.04761904762 | 0.04761904762 | 0.05555555556 |  | 0.7          | #DIV/0! |
| SLC46A2   | 0.04761904762 | 0.04761904762 | 0.05555555556 |  | 0.7          | #DIV/0! |
| SLC47A1   | 0.09523809524 | 0.09523809524 | 0.05555555556 |  | 1.473684211  | #DIV/0! |
| SLC47A2   | 0.09523809524 | 0.09523809524 | 0.05555555556 |  | 1.473684211  | #DIV/0! |
| SLC48A1   | 0.04761904762 | 0.04761904762 | 0.05555555556 |  | 0.7          | #DIV/0! |
| SLC49A3   | 0.04761904762 | 0.04761904762 | 0             |  | inf          | #DIV/0! |
| SLC49A4   | 0.09523809524 | 0.09523809524 | 0.05555555556 |  | 1.473684211  | #DIV/0! |
| SLC4A1    | 0.09523809524 | 0.09523809524 | 0             |  | inf          | #DIV/0! |
| SLC4A1    | 0             | 0             | 0.05555555556 |  | 0            | #DIV/0! |
| SLC4A1    | 0.1904761905  | 0.1904761905  | 0.05555555556 |  | 3.294117647  | #DIV/0! |
| LC4A1A    | 0             | 0             | 0.05555555556 |  | 0            | #DIV/0! |
| SLC4A2    | 0.09523809524 | 0.09523809524 | 0.05555555556 |  | 1.473684211  | #DIV/0! |
| SLC4A3    | 0             | 0             | 0.05555555556 |  | 0            | #DIV/0! |
| SLC4A4    | 0.09523809524 | 0.09523809524 | 0.05555555556 |  | 1.473684211  | #DIV/0! |
| SLC4A5    | 0             | 0             | 0.05555555556 |  | 0            | #DIV/0! |
| SLC4A7    | 0.04761904762 | 0.04761904762 | 0             |  | inf          | #DIV/0! |
| SLC4A8    | 0.04761904762 | 0.04761904762 | 0.05555555556 |  | 0.7          | #DIV/0! |
| SLC4A9    | 0.04761904762 | 0.04761904762 | 0             |  | inf          | #DIV/0! |
| SLC50A1   | 0.1904761905  | 0.1904761905  | 0.1111111111  |  | 1.529411765  | #DIV/0! |
| SLC51A    | 0.1428571429  | 0.1428571429  | 0.05555555556 |  | 2.333333333  | #DIV/0! |
| SLC51B    | 0.04761904762 | 0.04761904762 | 0.05555555556 |  | 0.7          | #DIV/0! |

|          |               |               |              |  |              |         |
|----------|---------------|---------------|--------------|--|--------------|---------|
| SLC52A1  | 0             | 0             | 0.1111111111 |  | 0            | #DIV/0! |
| SLC52A2  | 0.04761904762 | 0.04761904762 | 0.1666666667 |  | 0.2          | #DIV/0! |
| SLC52A3  | 0.1904761905  | 0.1904761905  | 0.0555555556 |  | 3.294117647  | #DIV/0! |
| SLC5A10  | 0.04761904762 | 0.04761904762 | 0.1111111111 |  | 0.325        | #DIV/0! |
| SLC5A10  | 0.04761904762 | 0.04761904762 | 0.1111111111 |  | 0.325        | #DIV/0! |
| SLC5A10  | 0.04761904762 | 0.04761904762 | 0            |  | inf          | #DIV/0! |
| SLC5A20  | 0.04761904762 | 0.04761904762 | 0            |  | inf          | #DIV/0! |
| SLC5A30  | 0.04761904762 | 0.04761904762 | 0.1111111111 |  | 0.325        | #DIV/0! |
| SLC5A40  | 0.04761904762 | 0.04761904762 | 0.1111111111 |  | 0.325        | #DIV/0! |
| C5A4-A0  | 0.04761904762 | 0.04761904762 | 0.1111111111 |  | 0.325        | #DIV/0! |
| SLC5A50  | 0.1428571429  | 0.1428571429  | 0.1111111111 |  | 1.083333333  | #DIV/0! |
| SLC5A70  | 0             | 0             | 0.0555555556 |  | 0            | #DIV/0! |
| SLC5A80  | 0.04761904762 | 0.04761904762 | 0.0555555556 |  | 0.7          | #DIV/0! |
| SLC5A90  | 0             | 0             | 0.0555555556 |  | 0            | #DIV/0! |
| SLC6A10  | 0.09523809524 | 0.09523809524 | 0            |  | inf          | #DIV/0! |
| C6A1-A0  | 0.04761904762 | 0.04761904762 | 0            |  | inf          | #DIV/0! |
| LC6A10   | 0.1428571429  | 0.1428571429  | 0            |  | inf          | #DIV/0! |
| SLC6A10  | 0.04761904762 | 0.04761904762 | 0            |  | inf          | #DIV/0! |
| SLC6A120 | 0.04761904762 | 0.04761904762 | 0.1111111111 |  | 0.325        | #DIV/0! |
| SLC6A130 | 0.04761904762 | 0.04761904762 | 0.1111111111 |  | 0.325        | #DIV/0! |
| SLC6A150 | 0.04761904762 | 0.04761904762 | 0.0555555556 |  | 0.7          | #DIV/0! |
| SLC6A160 | 0.09523809524 | 0.09523809524 | 0.1111111111 |  | 0.6842105263 | #DIV/0! |
| SLC6A170 | 0.04761904762 | 0.04761904762 | 0            |  | inf          | #DIV/0! |
| SLC6A180 | 0             | 0             | 0.1111111111 |  | 0            | #DIV/0! |
| SLC6A190 | 0             | 0             | 0.1111111111 |  | 0            | #DIV/0! |
| SLC6A20  | 0.04761904762 | 0.04761904762 | 0            |  | inf          | #DIV/0! |
| SLC6A30  | 0             | 0             | 0.1111111111 |  | 0            | #DIV/0! |
| SLC6A40  | 0             | 0             | 0.0555555556 |  | 0            | #DIV/0! |
| SLC6A60  | 0.04761904762 | 0.04761904762 | 0            |  | inf          | #DIV/0! |
| SLC6A90  | 0.04761904762 | 0.04761904762 | 0.0555555556 |  | 0.7          | #DIV/0! |
| SLC7A10  | 0.04761904762 | 0.04761904762 | 0.0555555556 |  | 0.7          | #DIV/0! |
| SLC7A10  | 0             | 0             | 0.0555555556 |  | 0            | #DIV/0! |
| C7A11-A0 | 0             | 0             | 0.0555555556 |  | 0            | #DIV/0! |
| SLC7A130 | 0.1904761905  | 0.1904761905  | 0.1111111111 |  | 1.529411765  | #DIV/0! |
| SLC7A140 | 0.1904761905  | 0.1904761905  | 0.0555555556 |  | 3.294117647  | #DIV/0! |
| C7A14-A0 | 0.1904761905  | 0.1904761905  | 0.0555555556 |  | 3.294117647  | #DIV/0! |
| SLC7A20  | 0.09523809524 | 0.09523809524 | 0.1111111111 |  | 0.6842105263 | #DIV/0! |
| SLC7A40  | 0.04761904762 | 0.04761904762 | 0.0555555556 |  | 0.7          | #DIV/0! |
| SLC7A50  | 0.04761904762 | 0.04761904762 | 0            |  | inf          | #DIV/0! |
| LC7A5P0  | 0.04761904762 | 0.04761904762 | 0            |  | inf          | #DIV/0! |
| SLC7A60  | 0.1428571429  | 0.1428571429  | 0.0555555556 |  | 2.333333333  | #DIV/0! |
| LC7A60   | 0.1428571429  | 0.1428571429  | 0.0555555556 |  | 2.333333333  | #DIV/0! |
| SLC7A70  | 0             | 0             | 0.0555555556 |  | 0            | #DIV/0! |
| SLC7A80  | 0             | 0             | 0.1111111111 |  | 0            | #DIV/0! |
| SLC7A90  | 0.04761904762 | 0.04761904762 | 0.0555555556 |  | 0.7          | #DIV/0! |
| SLC8A10  | 0             | 0             | 0.0555555556 |  | 0            | #DIV/0! |
| C8A1-A0  | 0             | 0             | 0.0555555556 |  | 0            | #DIV/0! |
| SLC8A20  | 0.09523809524 | 0.09523809524 | 0.1111111111 |  | 0.6842105263 | #DIV/0! |
| SLC8B10  | 0             | 0             | 0.0555555556 |  | 0            | #DIV/0! |
| SLC9A10  | 0.04761904762 | 0.04761904762 | 0.1111111111 |  | 0.325        | #DIV/0! |
| SLC9A20  | 0             | 0             | 0.0555555556 |  | 0            | #DIV/0! |

|         |               |               |               |  |              |         |
|---------|---------------|---------------|---------------|--|--------------|---------|
| SLC9A3  | 0             | 0             | 0.05555555556 |  | 0            | #DIV/0! |
| C9A3-A  | 0             | 0             | 0.05555555556 |  | 0            | #DIV/0! |
| LC9A3R  | 0.04761904762 | 0.04761904762 | 0             |  | inf          | #DIV/0! |
| LC9A3R  | 0.09523809524 | 0.09523809524 | 0.2222222222  |  | 0.2894736842 | #DIV/0! |
| SLC9A4  | 0             | 0             | 0.05555555556 |  | 0            | #DIV/0! |
| SLC9A5  | 0.1428571429  | 0.1428571429  | 0.05555555556 |  | 2.333333333  | #DIV/0! |
| LC9A7P  | 0.04761904762 | 0.04761904762 | 0.05555555556 |  | 0.7          | #DIV/0! |
| SLC9A8  | 0.09523809524 | 0.09523809524 | 0.1666666667  |  | 0.4210526316 | #DIV/0! |
| SLC9A9  | 0.1428571429  | 0.1428571429  | 0.1111111111  |  | 1.083333333  | #DIV/0! |
| C9A9-A  | 0.1428571429  | 0.1428571429  | 0.05555555556 |  | 2.333333333  | #DIV/0! |
| SLC9B1  | 0             | 0             | 0.05555555556 |  | 0            | #DIV/0! |
| SLC9B2  | 0             | 0             | 0.05555555556 |  | 0            | #DIV/0! |
| SLC9C1  | 0.09523809524 | 0.09523809524 | 0.05555555556 |  | 1.473684211  | #DIV/0! |
| SLC9C2  | 0.1428571429  | 0.1428571429  | 0             |  | inf          | #DIV/0! |
| LCO1A   | 0.04761904762 | 0.04761904762 | 0.05555555556 |  | 0.7          | #DIV/0! |
| LCO1B   | 0.04761904762 | 0.04761904762 | 0.1111111111  |  | 0.325        | #DIV/0! |
| LCO1B   | 0.04761904762 | 0.04761904762 | 0.1111111111  |  | 0.325        | #DIV/0! |
| LCO1B   | 0.04761904762 | 0.04761904762 | 0.1111111111  |  | 0.325        | #DIV/0! |
| LCO1C   | 0.04761904762 | 0.04761904762 | 0.1111111111  |  | 0.325        | #DIV/0! |
| LCO2A   | 0.1428571429  | 0.1428571429  | 0.05555555556 |  | 2.333333333  | #DIV/0! |
| LCO3A   | 0.04761904762 | 0.04761904762 | 0.05555555556 |  | 0.7          | #DIV/0! |
| LCO4A   | 0.1428571429  | 0.1428571429  | 0.2222222222  |  | 0.4583333333 | #DIV/0! |
| CO4A1-A | 0.1428571429  | 0.1428571429  | 0.2222222222  |  | 0.4583333333 | #DIV/0! |
| LCO4C   | 0.04761904762 | 0.04761904762 | 0             |  | inf          | #DIV/0! |
| LCO5A   | 0.1428571429  | 0.1428571429  | 0.1666666667  |  | 0.6666666667 | #DIV/0! |
| LCO6A   | 0.04761904762 | 0.04761904762 | 0             |  | inf          | #DIV/0! |
| SLED1   | 0             | 0             | 0.05555555556 |  | 0            | #DIV/0! |
| SLF1    | 0.04761904762 | 0.04761904762 | 0             |  | inf          | #DIV/0! |
| SLF2    | 0.1428571429  | 0.1428571429  | 0             |  | inf          | #DIV/0! |
| SLFN12  | 0.04761904762 | 0.04761904762 | 0             |  | inf          | #DIV/0! |
| SLFN13  | 0.04761904762 | 0.04761904762 | 0             |  | inf          | #DIV/0! |
| SLFN14  | 0.04761904762 | 0.04761904762 | 0             |  | inf          | #DIV/0! |
| SLFNL1  | 0.04761904762 | 0.04761904762 | 0.05555555556 |  | 0.7          | #DIV/0! |
| FNL1-A  | 0.04761904762 | 0.04761904762 | 0.05555555556 |  | 0.7          | #DIV/0! |
| SLIT1   | 0.1428571429  | 0.1428571429  | 0             |  | inf          | #DIV/0! |
| LIT1-AS | 0.1428571429  | 0.1428571429  | 0             |  | inf          | #DIV/0! |
| SLIT3   | 0             | 0             | 0.05555555556 |  | 0            | #DIV/0! |
| LITRK3  | 0.1428571429  | 0.1428571429  | 0.05555555556 |  | 2.333333333  | #DIV/0! |
| SLK     | 0.1428571429  | 0.1428571429  | 0.1111111111  |  | 1.083333333  | #DIV/0! |
| SLMAP   | 0.09523809524 | 0.09523809524 | 0             |  | inf          | #DIV/0! |
| IO2-AT  | 0.1428571429  | 0.1428571429  | 0.2222222222  |  | 0.4583333333 | #DIV/0! |
| SLPI    | 0.1428571429  | 0.1428571429  | 0.1666666667  |  | 0.6666666667 | #DIV/0! |
| SLTM    | 0.04761904762 | 0.04761904762 | 0.05555555556 |  | 0.7          | #DIV/0! |
| SLU7    | 0.04761904762 | 0.04761904762 | 0.05555555556 |  | 0.7          | #DIV/0! |
| SLURP1  | 0.04761904762 | 0.04761904762 | 0.1666666667  |  | 0.2          | #DIV/0! |
| SLURP2  | 0.04761904762 | 0.04761904762 | 0.1666666667  |  | 0.2          | #DIV/0! |
| SLX1A   | 0.04761904762 | 0.04761904762 | 0             |  | inf          | #DIV/0! |
| IA-SULT | 0.04761904762 | 0.04761904762 | 0             |  | inf          | #DIV/0! |
| SLX1B   | 0.04761904762 | 0.04761904762 | 0             |  | inf          | #DIV/0! |
| IB-SULT | 0.04761904762 | 0.04761904762 | 0             |  | inf          | #DIV/0! |
| SLX4    | 0.04761904762 | 0.04761904762 | 0.1111111111  |  | 0.325        | #DIV/0! |



|        |               |               |              |  |              |         |
|--------|---------------|---------------|--------------|--|--------------|---------|
| SLX4IP | 0.1904761905  | 0.1904761905  | 0.1666666667 |  | 0.9411764706 | #DIV/0! |
| SMA4   | 0.09523809524 | 0.09523809524 | 0.1666666667 |  | 0.4210526316 | #DIV/0! |
| SMA5   | 0.09523809524 | 0.09523809524 | 0.1666666667 |  | 0.4210526316 | #DIV/0! |
| SMAD1  | 0             | 0             | 0.0555555556 |  | 0            | #DIV/0! |
| IAD1-A | 0             | 0             | 0.0555555556 |  | 0            | #DIV/0! |
| IAD1-A | 0             | 0             | 0.0555555556 |  | 0            | #DIV/0! |
| SMAD2  | 0.04761904762 | 0.04761904762 | 0.0555555556 |  | 0.7          | #DIV/0! |
| SMAD3  | 0.04761904762 | 0.04761904762 | 0.0555555556 |  | 0.7          | #DIV/0! |
| SMAD4  | 0.09523809524 | 0.09523809524 | 0            |  | inf          | #DIV/0! |
| SMAD5  | 0.04761904762 | 0.04761904762 | 0            |  | inf          | #DIV/0! |
| IAD5-A | 0.04761904762 | 0.04761904762 | 0            |  | inf          | #DIV/0! |
| SMAD6  | 0.04761904762 | 0.04761904762 | 0.0555555556 |  | 0.7          | #DIV/0! |
| SMAD7  | 0.04761904762 | 0.04761904762 | 0            |  | inf          | #DIV/0! |
| SMAGP  | 0.09523809524 | 0.09523809524 | 0.0555555556 |  | 1.473684211  | #DIV/0! |
| SMAP2  | 0.04761904762 | 0.04761904762 | 0.0555555556 |  | 0.7          | #DIV/0! |
| MARCA  | 0.04761904762 | 0.04761904762 | 0.0555555556 |  | 0.7          | #DIV/0! |
| MARCA  | 0.1428571429  | 0.1428571429  | 0.1111111111 |  | 1.083333333  | #DIV/0! |
| MARCA  | 0             | 0             | 0.0555555556 |  | 0            | #DIV/0! |
| ARCA5- | 0             | 0             | 0.0555555556 |  | 0            | #DIV/0! |
| IARCAI | 0             | 0             | 0.0555555556 |  | 0            | #DIV/0! |
| IARCAI | 0             | 0             | 0.0555555556 |  | 0            | #DIV/0! |
| MARCB  | 0.04761904762 | 0.04761904762 | 0.1111111111 |  | 0.325        | #DIV/0! |
| MARCC  | 0.09523809524 | 0.09523809524 | 0            |  | inf          | #DIV/0! |
| MARCC  | 0.09523809524 | 0.09523809524 | 0.0555555556 |  | 1.473684211  | #DIV/0! |
| MARCD  | 0.04761904762 | 0.04761904762 | 0.0555555556 |  | 0.7          | #DIV/0! |
| MARCD  | 0.04761904762 | 0.04761904762 | 0            |  | inf          | #DIV/0! |
| MARCD  | 0.09523809524 | 0.09523809524 | 0.0555555556 |  | 1.473684211  | #DIV/0! |
| MARCE  | 0.09523809524 | 0.09523809524 | 0            |  | inf          | #DIV/0! |
| SMC1B  | 0             | 0             | 0.1111111111 |  | 0            | #DIV/0! |
| SMC2   | 0.04761904762 | 0.04761904762 | 0            |  | inf          | #DIV/0! |
| MC2-AS | 0.04761904762 | 0.04761904762 | 0            |  | inf          | #DIV/0! |
| SMC3   | 0.1428571429  | 0.1428571429  | 0.0555555556 |  | 2.333333333  | #DIV/0! |
| SMC4   | 0.1428571429  | 0.1428571429  | 0.0555555556 |  | 2.333333333  | #DIV/0! |
| SMC5   | 0             | 0             | 0.0555555556 |  | 0            | #DIV/0! |
| MC5-AS | 0             | 0             | 0.0555555556 |  | 0            | #DIV/0! |
| SMC6   | 0             | 0             | 0.0555555556 |  | 0            | #DIV/0! |
| SMCHD  | 0.09523809524 | 0.09523809524 | 0            |  | inf          | #DIV/0! |
| SMCO1  | 0.1428571429  | 0.1428571429  | 0.0555555556 |  | 2.333333333  | #DIV/0! |
| SMCO2  | 0.04761904762 | 0.04761904762 | 0.0555555556 |  | 0.7          | #DIV/0! |
| SMCO3  | 0.04761904762 | 0.04761904762 | 0.1111111111 |  | 0.325        | #DIV/0! |
| SMCP   | 0.1904761905  | 0.1904761905  | 0            |  | inf          | #DIV/0! |
| SMCR2  | 0.04761904762 | 0.04761904762 | 0.1111111111 |  | 0.325        | #DIV/0! |
| SMCR5  | 0.04761904762 | 0.04761904762 | 0.1111111111 |  | 0.325        | #DIV/0! |
| SMCR8  | 0.04761904762 | 0.04761904762 | 0.1111111111 |  | 0.325        | #DIV/0! |
| SMDT1  | 0             | 0             | 0.1111111111 |  | 0            | #DIV/0! |
| SMG1   | 0.04761904762 | 0.04761904762 | 0            |  | inf          | #DIV/0! |
| SMG1P1 | 0.04761904762 | 0.04761904762 | 0            |  | inf          | #DIV/0! |
| SMG1P2 | 0.04761904762 | 0.04761904762 | 0            |  | inf          | #DIV/0! |
| SMG1P3 | 0.04761904762 | 0.04761904762 | 0            |  | inf          | #DIV/0! |
| SMG1P5 | 0.04761904762 | 0.04761904762 | 0            |  | inf          | #DIV/0! |
| SMG1P6 | 0.04761904762 | 0.04761904762 | 0            |  | inf          | #DIV/0! |

|         |               |               |               |  |              |         |
|---------|---------------|---------------|---------------|--|--------------|---------|
| SMG1P7  | 0.1428571429  | 0.1428571429  | 0.05555555556 |  | 2.333333333  | #DIV/0! |
| SMG6    | 0             | 0             | 0.1111111111  |  | 0            | #DIV/0! |
| SMG7    | 0.1428571429  | 0.1428571429  | 0             |  | inf          | #DIV/0! |
| MG7-AS  | 0.1428571429  | 0.1428571429  | 0             |  | inf          | #DIV/0! |
| SMG8    | 0.1428571429  | 0.1428571429  | 0             |  | inf          | #DIV/0! |
| SMG9    | 0.09523809524 | 0.09523809524 | 0.05555555556 |  | 1.473684211  | #DIV/0! |
| SMILR   | 0.1428571429  | 0.1428571429  | 0.1111111111  |  | 1.083333333  | #DIV/0! |
| SMIM1   | 0             | 0             | 0.05555555556 |  | 0            | #DIV/0! |
| MIM10L  | 0.04761904762 | 0.04761904762 | 0.1111111111  |  | 0.325        | #DIV/0! |
| MIM11L  | 0.04761904762 | 0.04761904762 | 0.1111111111  |  | 0.325        | #DIV/0! |
| MIM11U  | 0.04761904762 | 0.04761904762 | 0.1111111111  |  | 0.325        | #DIV/0! |
| SMIM12L | 0.04761904762 | 0.04761904762 | 0             |  | inf          | #DIV/0! |
| SMIM13L | 0.04761904762 | 0.04761904762 | 0             |  | inf          | #DIV/0! |
| SMIM14L | 0.1904761905  | 0.1904761905  | 0.05555555556 |  | 3.294117647  | #DIV/0! |
| SMIM15L | 0.04761904762 | 0.04761904762 | 0             |  | inf          | #DIV/0! |
| IIM15-A | 0.04761904762 | 0.04761904762 | 0             |  | inf          | #DIV/0! |
| SMIM17L | 0.1428571429  | 0.1428571429  | 0.05555555556 |  | 2.333333333  | #DIV/0! |
| SMIM18L | 0.04761904762 | 0.04761904762 | 0.1111111111  |  | 0.325        | #DIV/0! |
| SMIM19L | 0.09523809524 | 0.09523809524 | 0.1666666667  |  | 0.4210526316 | #DIV/0! |
| SMIM21L | 0.09523809524 | 0.09523809524 | 0             |  | inf          | #DIV/0! |
| SMIM22L | 0.04761904762 | 0.04761904762 | 0             |  | inf          | #DIV/0! |
| SMIM23L | 0             | 0             | 0.05555555556 |  | 0            | #DIV/0! |
| SMIM24L | 0.09523809524 | 0.09523809524 | 0.05555555556 |  | 1.473684211  | #DIV/0! |
| SMIM25L | 0.09523809524 | 0.09523809524 | 0.1666666667  |  | 0.4210526316 | #DIV/0! |
| SMIM26L | 0.1904761905  | 0.1904761905  | 0.05555555556 |  | 3.294117647  | #DIV/0! |
| SMIM27L | 0.09523809524 | 0.09523809524 | 0.05555555556 |  | 1.473684211  | #DIV/0! |
| SMIM29L | 0.04761904762 | 0.04761904762 | 0             |  | inf          | #DIV/0! |
| SMIM30L | 0.04761904762 | 0.04761904762 | 0.05555555556 |  | 0.7          | #DIV/0! |
| SMIM31L | 0.04761904762 | 0.04761904762 | 0.05555555556 |  | 0.7          | #DIV/0! |
| SMIM32L | 0.04761904762 | 0.04761904762 | 0             |  | inf          | #DIV/0! |
| SMIM33L | 0.04761904762 | 0.04761904762 | 0             |  | inf          | #DIV/0! |
| MIM34L  | 0.04761904762 | 0.04761904762 | 0.1111111111  |  | 0.325        | #DIV/0! |
| SMIM4L  | 0.04761904762 | 0.04761904762 | 0             |  | inf          | #DIV/0! |
| SMIM40L | 0.04761904762 | 0.04761904762 | 0             |  | inf          | #DIV/0! |
| SMIM41L | 0.04761904762 | 0.04761904762 | 0.05555555556 |  | 0.7          | #DIV/0! |
| SMIM7L  | 0.1428571429  | 0.1428571429  | 0.1111111111  |  | 1.083333333  | #DIV/0! |
| SMKR1L  | 0.04761904762 | 0.04761904762 | 0.05555555556 |  | 0.7          | #DIV/0! |
| SMN1L   | 0.09523809524 | 0.09523809524 | 0.1666666667  |  | 0.4210526316 | #DIV/0! |
| SMN2L   | 0.09523809524 | 0.09523809524 | 0.1666666667  |  | 0.4210526316 | #DIV/0! |
| SMNDC1L | 0.1428571429  | 0.1428571429  | 0.05555555556 |  | 2.333333333  | #DIV/0! |
| SMO     | 0.04761904762 | 0.04761904762 | 0.05555555556 |  | 0.7          | #DIV/0! |
| SMOX    | 0.1904761905  | 0.1904761905  | 0.05555555556 |  | 3.294117647  | #DIV/0! |
| SMPD1L  | 0.04761904762 | 0.04761904762 | 0             |  | inf          | #DIV/0! |
| SMPD2L  | 0             | 0             | 0             |  |              | #DIV/0! |
| SMPD3L  | 0.1428571429  | 0.1428571429  | 0.05555555556 |  | 2.333333333  | #DIV/0! |
| SMPD4L  | 0             | 0             | 0.05555555556 |  | 0            | #DIV/0! |
| SMPD5L  | 0.04761904762 | 0.04761904762 | 0.1666666667  |  | 0.2          | #DIV/0! |
| MPDL3L  | 0.04761904762 | 0.04761904762 | 0.1111111111  |  | 0.325        | #DIV/0! |
| SMR3AL  | 0.04761904762 | 0.04761904762 | 0.05555555556 |  | 0.7          | #DIV/0! |
| SMR3BL  | 0.04761904762 | 0.04761904762 | 0.05555555556 |  | 0.7          | #DIV/0! |
| SMTNL   | 0.04761904762 | 0.04761904762 | 0.1111111111  |  | 0.325        | #DIV/0! |

|         |               |               |               |  |              |         |
|---------|---------------|---------------|---------------|--|--------------|---------|
| SMTNL2  | 0             | 0             | 0.1111111111  |  | 0            | #DIV/0! |
| SMU1    | 0.09523809524 | 0.09523809524 | 0.05555555556 |  | 1.473684211  | #DIV/0! |
| SMUG1   | 0.04761904762 | 0.04761904762 | 0.05555555556 |  | 0.7          | #DIV/0! |
| SMURF1  | 0.04761904762 | 0.04761904762 | 0.05555555556 |  | 0.7          | #DIV/0! |
| SMURF2  | 0.04761904762 | 0.04761904762 | 0             |  | inf          | #DIV/0! |
| SMYD1   | 0             | 0             | 0.05555555556 |  | 0            | #DIV/0! |
| SMYD2   | 0.1428571429  | 0.1428571429  | 0             |  | inf          | #DIV/0! |
| SMYD3   | 0.1428571429  | 0.1428571429  | 0.05555555556 |  | 2.333333333  | #DIV/0! |
| SMYD4   | 0             | 0             | 0.1111111111  |  | 0            | #DIV/0! |
| SMYD5   | 0             | 0             | 0.05555555556 |  | 0            | #DIV/0! |
| SNAI1   | 0.09523809524 | 0.09523809524 | 0.1666666667  |  | 0.4210526316 | #DIV/0! |
| SNAI2   | 0.09523809524 | 0.09523809524 | 0.1666666667  |  | 0.4210526316 | #DIV/0! |
| SNAI3   | 0.1904761905  | 0.1904761905  | 0             |  | inf          | #DIV/0! |
| NAI3-AS | 0.1904761905  | 0.1904761905  | 0             |  | inf          | #DIV/0! |
| SNAP25  | 0.1904761905  | 0.1904761905  | 0.1111111111  |  | 1.529411765  | #DIV/0! |
| AP25-A  | 0.1904761905  | 0.1904761905  | 0.1111111111  |  | 1.529411765  | #DIV/0! |
| SNAP29  | 0.04761904762 | 0.04761904762 | 0.05555555556 |  | 0.7          | #DIV/0! |
| SNAP47  | 0.1428571429  | 0.1428571429  | 0             |  | inf          | #DIV/0! |
| SNAPC2  | 0.1428571429  | 0.1428571429  | 0.05555555556 |  | 2.333333333  | #DIV/0! |
| SNAPC3  | 0.04761904762 | 0.04761904762 | 0.05555555556 |  | 0.7          | #DIV/0! |
| SNAPC4  | 0.1428571429  | 0.1428571429  | 0.05555555556 |  | 2.333333333  | #DIV/0! |
| SNAPC5  | 0.04761904762 | 0.04761904762 | 0.05555555556 |  | 0.7          | #DIV/0! |
| SNAPIN  | 0.1904761905  | 0.1904761905  | 0.05555555556 |  | 3.294117647  | #DIV/0! |
| NAR-A0  | 0.09523809524 | 0.09523809524 | 0.1111111111  |  | 0.6842105263 | #DIV/0! |
| NAR-A1  | 0.09523809524 | 0.09523809524 | 0.1111111111  |  | 0.6842105263 | #DIV/0! |
| NAR-A1  | 0.09523809524 | 0.09523809524 | 0.1111111111  |  | 0.6842105263 | #DIV/0! |
| NAR-A1  | 0.09523809524 | 0.09523809524 | 0.1111111111  |  | 0.6842105263 | #DIV/0! |
| NAR-A1  | 0.09523809524 | 0.09523809524 | 0.1111111111  |  | 0.6842105263 | #DIV/0! |
| NAR-A1  | 0.09523809524 | 0.09523809524 | 0.1111111111  |  | 0.6842105263 | #DIV/0! |
| NAR-A2  | 0.09523809524 | 0.09523809524 | 0.1111111111  |  | 0.6842105263 | #DIV/0! |
| NAR-A3  | 0.09523809524 | 0.09523809524 | 0.1111111111  |  | 0.6842105263 | #DIV/0! |
| NAR-A4  | 0.09523809524 | 0.09523809524 | 0.1111111111  |  | 0.6842105263 | #DIV/0! |
| NAR-A5  | 0.09523809524 | 0.09523809524 | 0.1111111111  |  | 0.6842105263 | #DIV/0! |
| NAR-A6  | 0.09523809524 | 0.09523809524 | 0.1111111111  |  | 0.6842105263 | #DIV/0! |
| NAR-A7  | 0.09523809524 | 0.09523809524 | 0.1111111111  |  | 0.6842105263 | #DIV/0! |
| NAR-A8  | 0.09523809524 | 0.09523809524 | 0.1111111111  |  | 0.6842105263 | #DIV/0! |
| NAR-A9  | 0.09523809524 | 0.09523809524 | 0.1111111111  |  | 0.6842105263 | #DIV/0! |
| NAR-B0  | 0.09523809524 | 0.09523809524 | 0.1111111111  |  | 0.6842105263 | #DIV/0! |
| NAR-B0  | 0.09523809524 | 0.09523809524 | 0.1111111111  |  | 0.6842105263 | #DIV/0! |
| NAR-C0  | 0.09523809524 | 0.09523809524 | 0.1111111111  |  | 0.6842105263 | #DIV/0! |
| NAR-C0  | 0.09523809524 | 0.09523809524 | 0.1111111111  |  | 0.6842105263 | #DIV/0! |
| NAR-C0  | 0.09523809524 | 0.09523809524 | 0.1111111111  |  | 0.6842105263 | #DIV/0! |
| NAR-C0  | 0.09523809524 | 0.09523809524 | 0.1111111111  |  | 0.6842105263 | #DIV/0! |
| NAR-C0  | 0.09523809524 | 0.09523809524 | 0.1111111111  |  | 0.6842105263 | #DIV/0! |
| SNAR-D0 | 0.09523809524 | 0.09523809524 | 0.1111111111  |  | 0.6842105263 | #DIV/0! |
| SNAR-E0 | 0.09523809524 | 0.09523809524 | 0.1111111111  |  | 0.6842105263 | #DIV/0! |
| SNAR-F0 | 0.09523809524 | 0.09523809524 | 0.1111111111  |  | 0.6842105263 | #DIV/0! |
| NAR-G0  | 0.09523809524 | 0.09523809524 | 0.1111111111  |  | 0.6842105263 | #DIV/0! |
| NAR-G0  | 0.09523809524 | 0.09523809524 | 0.1111111111  |  | 0.6842105263 | #DIV/0! |
| SNAR-H  | 0             | 0             | 0.05555555556 |  | 0            | #DIV/0! |
| SNAR-I0 | 0.09523809524 | 0.09523809524 | 0.05555555556 |  | 1.473684211  | #DIV/0! |

|        |               |               |               |  |               |         |
|--------|---------------|---------------|---------------|--|---------------|---------|
| SNCA   | 0             | 0             | 0.05555555556 |  | 0             | #DIV/0! |
| NCA-AS | 0             | 0             | 0.05555555556 |  | 0             | #DIV/0! |
| SNCAIP | 0.04761904762 | 0.04761904762 | 0             |  | inf           | #DIV/0! |
| SNCB   | 0.09523809524 | 0.09523809524 | 0.05555555556 |  | 1.473684211   | #DIV/0! |
| SNCG   | 0.1428571429  | 0.1428571429  | 0.05555555556 |  | 2.333333333   | #DIV/0! |
| SND1   | 0.04761904762 | 0.04761904762 | 0.05555555556 |  | 0.7           | #DIV/0! |
| NDI-IT | 0.04761904762 | 0.04761904762 | 0.05555555556 |  | 0.7           | #DIV/0! |
| SNED1  | 0             | 0             | 0.05555555556 |  | 0             | #DIV/0! |
| SNF8   | 0.1428571429  | 0.1428571429  | 0             |  | inf           | #DIV/0! |
| SNHG11 | 0.1428571429  | 0.1428571429  | 0.16666666667 |  | 0.66666666667 | #DIV/0! |
| SNHG12 | 0.04761904762 | 0.04761904762 | 0.11111111111 |  | 0.325         | #DIV/0! |
| SNHG15 | 0.04761904762 | 0.04761904762 | 0.22222222222 |  | 0.1375        | #DIV/0! |
| SNHG16 | 0.04761904762 | 0.04761904762 | 0             |  | inf           | #DIV/0! |
| SNHG17 | 0.1428571429  | 0.1428571429  | 0.16666666667 |  | 0.66666666667 | #DIV/0! |
| SNHG18 | 0             | 0             | 0.05555555556 |  | 0             | #DIV/0! |
| SNHG19 | 0.09523809524 | 0.09523809524 | 0.22222222222 |  | 0.2894736842  | #DIV/0! |
| SNHG20 | 0.04761904762 | 0.04761904762 | 0             |  | inf           | #DIV/0! |
| SNHG21 | 0.04761904762 | 0.04761904762 | 0.05555555556 |  | 0.7           | #DIV/0! |
| SNHG22 | 0.04761904762 | 0.04761904762 | 0             |  | inf           | #DIV/0! |
| SNHG25 | 0.04761904762 | 0.04761904762 | 0             |  | inf           | #DIV/0! |
| SNHG26 | 0.04761904762 | 0.04761904762 | 0.16666666667 |  | 0.2           | #DIV/0! |
| SNHG27 | 0             | 0             | 0.05555555556 |  | 0             | #DIV/0! |
| SNHG28 | 0.1428571429  | 0.1428571429  | 0             |  | inf           | #DIV/0! |
| SNHG29 | 0.04761904762 | 0.04761904762 | 0.05555555556 |  | 0.7           | #DIV/0! |
| SNHG3  | 0.04761904762 | 0.04761904762 | 0.11111111111 |  | 0.325         | #DIV/0! |
| SNHG30 | 0.04761904762 | 0.04761904762 | 0             |  | inf           | #DIV/0! |
| SNHG31 | 0             | 0             | 0.05555555556 |  | 0             | #DIV/0! |
| SNHG32 | 0.04761904762 | 0.04761904762 | 0             |  | inf           | #DIV/0! |
| SNHG4  | 0.04761904762 | 0.04761904762 | 0             |  | inf           | #DIV/0! |
| SNHG6  | 0.1428571429  | 0.1428571429  | 0.16666666667 |  | 0.66666666667 | #DIV/0! |
| SNHG7  | 0.1428571429  | 0.1428571429  | 0.05555555556 |  | 2.333333333   | #DIV/0! |
| SNHG8  | 0             | 0             | 0.05555555556 |  | 0             | #DIV/0! |
| SNHG9  | 0.09523809524 | 0.09523809524 | 0.22222222222 |  | 0.2894736842  | #DIV/0! |
| SNIP1  | 0.04761904762 | 0.04761904762 | 0.05555555556 |  | 0.7           | #DIV/0! |
| SNN    | 0.04761904762 | 0.04761904762 | 0             |  | inf           | #DIV/0! |
| NORA10 | 0.09523809524 | 0.09523809524 | 0.22222222222 |  | 0.2894736842  | #DIV/0! |
| NORA10 | 0.1428571429  | 0.1428571429  | 0.05555555556 |  | 2.333333333   | #DIV/0! |
| ORA10  | 0             | 0             | 0.05555555556 |  | 0             | #DIV/0! |
| ORA10  | 0.09523809524 | 0.09523809524 | 0             |  | inf           | #DIV/0! |
| NORA10 | 0.1428571429  | 0.1428571429  | 0             |  | inf           | #DIV/0! |
| NORA10 | 0.1428571429  | 0.1428571429  | 0.11111111111 |  | 1.083333333   | #DIV/0! |
| ORA10  | 0.04761904762 | 0.04761904762 | 0.16666666667 |  | 0.2           | #DIV/0! |
| ORA10  | 0.04761904762 | 0.04761904762 | 0.16666666667 |  | 0.2           | #DIV/0! |
| NORA10 | 0.09523809524 | 0.09523809524 | 0             |  | inf           | #DIV/0! |
| NORA10 | 0             | 0             | 0.05555555556 |  | 0             | #DIV/0! |
| NORA11 | 0.04761904762 | 0.04761904762 | 0.05555555556 |  | 0.7           | #DIV/0! |
| NORA10 | 0.04761904762 | 0.04761904762 | 0             |  | inf           | #DIV/0! |
| NORA11 | 0             | 0             | 0.11111111111 |  | 0             | #DIV/0! |
| NORA11 | 0.09523809524 | 0.09523809524 | 0.11111111111 |  | 0.6842105263  | #DIV/0! |
| NORA11 | 0.04761904762 | 0.04761904762 | 0.16666666667 |  | 0.2           | #DIV/0! |
| NORA11 | 0             | 0             | 0.11111111111 |  | 0             | #DIV/0! |

|        |               |               |               |  |              |         |
|--------|---------------|---------------|---------------|--|--------------|---------|
| NORA11 | 0.1428571429  | 0.1428571429  | 0.2222222222  |  | 0.4583333333 | #DIV/0! |
| NORA11 | 0.1428571429  | 0.1428571429  | 0.1111111111  |  | 1.0833333333 | #DIV/0! |
| NORA11 | 0.09523809524 | 0.09523809524 | 0             |  | inf          | #DIV/0! |
| NORA11 | 0.1904761905  | 0.1904761905  | 0.05555555556 |  | 3.294117647  | #DIV/0! |
| NORA1  | 0.1428571429  | 0.1428571429  | 0             |  | inf          | #DIV/0! |
| NORA12 | 0.04761904762 | 0.04761904762 | 0.1111111111  |  | 0.325        | #DIV/0! |
| NORA1  | 0.04761904762 | 0.04761904762 | 0             |  | inf          | #DIV/0! |
| NORA14 | 0.1428571429  | 0.1428571429  | 0.1111111111  |  | 1.0833333333 | #DIV/0! |
| NORA14 | 0.1428571429  | 0.1428571429  | 0.05555555556 |  | 2.3333333333 | #DIV/0! |
| NORA1  | 0.2380952381  | 0.2380952381  | 0.2222222222  |  | 0.859375     | #DIV/0! |
| ORA15  | 0.04761904762 | 0.04761904762 | 0.1111111111  |  | 0.325        | #DIV/0! |
| ORA15  | 0.04761904762 | 0.04761904762 | 0.1111111111  |  | 0.325        | #DIV/0! |
| NORA16 | 0.04761904762 | 0.04761904762 | 0.1111111111  |  | 0.325        | #DIV/0! |
| NORA16 | 0.09523809524 | 0.09523809524 | 0             |  | inf          | #DIV/0! |
| NORA17 | 0.1428571429  | 0.1428571429  | 0.05555555556 |  | 2.3333333333 | #DIV/0! |
| NORA17 | 0.1428571429  | 0.1428571429  | 0.05555555556 |  | 2.3333333333 | #DIV/0! |
| NORA1  | 0.2380952381  | 0.2380952381  | 0             |  | inf          | #DIV/0! |
| NORA1  | 0.1428571429  | 0.1428571429  | 0.1111111111  |  | 1.0833333333 | #DIV/0! |
| NORA20 | 0.04761904762 | 0.04761904762 | 0.2222222222  |  | 0.1375       | #DIV/0! |
| NORA2  | 0.09523809524 | 0.09523809524 | 0             |  | inf          | #DIV/0! |
| NORA21 | 0.09523809524 | 0.09523809524 | 0             |  | inf          | #DIV/0! |
| NORA2  | 0.04761904762 | 0.04761904762 | 0.1111111111  |  | 0.325        | #DIV/0! |
| NORA22 | 0.2380952381  | 0.2380952381  | 0.2222222222  |  | 0.859375     | #DIV/0! |
| NORA22 | 0.04761904762 | 0.04761904762 | 0.1111111111  |  | 0.325        | #DIV/0! |
| NORA2  | 0.04761904762 | 0.04761904762 | 0.05555555556 |  | 0.7          | #DIV/0! |
| NORA2  | 0             | 0             | 0.05555555556 |  | 0            | #DIV/0! |
| NORA24 | 0.04761904762 | 0.04761904762 | 0.05555555556 |  | 0.7          | #DIV/0! |
| NORA25 | 0.04761904762 | 0.04761904762 | 0.1111111111  |  | 0.325        | #DIV/0! |
| NORA2  | 0.2380952381  | 0.2380952381  | 0.05555555556 |  | 4.375        | #DIV/0! |
| NORA2  | 0.04761904762 | 0.04761904762 | 0.05555555556 |  | 0.7          | #DIV/0! |
| NORA2  | 0.04761904762 | 0.04761904762 | 0.05555555556 |  | 0.7          | #DIV/0! |
| NORA2  | 0.04761904762 | 0.04761904762 | 0.05555555556 |  | 0.7          | #DIV/0! |
| NORA3  | 0.04761904762 | 0.04761904762 | 0             |  | inf          | #DIV/0! |
| NORA30 | 0.09523809524 | 0.09523809524 | 0.1111111111  |  | 0.6842105263 | #DIV/0! |
| NORA36 | 0.1428571429  | 0.1428571429  | 0.05555555556 |  | 2.3333333333 | #DIV/0! |
| NORA36 | 0             | 0             | 0.05555555556 |  | 0            | #DIV/0! |
| NORA3  | 0.09523809524 | 0.09523809524 | 0             |  | inf          | #DIV/0! |
| NORA3  | 0.04761904762 | 0.04761904762 | 0             |  | inf          | #DIV/0! |
| NORA38 | 0             | 0             | 0             |  |              | #DIV/0! |
| NORA3  | 0.04761904762 | 0.04761904762 | 0.1111111111  |  | 0.325        | #DIV/0! |
| NORA4  | 0.09523809524 | 0.09523809524 | 0.05555555556 |  | 1.473684211  | #DIV/0! |
| NORA40 | 0.04761904762 | 0.04761904762 | 0.05555555556 |  | 0.7          | #DIV/0! |
| NORA40 | 0             | 0             | 0             |  |              | #DIV/0! |
| NORA4  | 0             | 0             | 0.05555555556 |  | 0            | #DIV/0! |
| NORA41 | 0.04761904762 | 0.04761904762 | 0             |  | inf          | #DIV/0! |
| NORA4  | 0.04761904762 | 0.04761904762 | 0.1111111111  |  | 0.325        | #DIV/0! |
| NORA4  | 0.04761904762 | 0.04761904762 | 0             |  | inf          | #DIV/0! |
| NORA4  | 0.04761904762 | 0.04761904762 | 0             |  | inf          | #DIV/0! |
| NORA4  | 0             | 0             | 0.05555555556 |  | 0            | #DIV/0! |
| NORA4  | 0.09523809524 | 0.09523809524 | 0.05555555556 |  | 1.473684211  | #DIV/0! |
| NORA50 | 0.04761904762 | 0.04761904762 | 0             |  | inf          | #DIV/0! |

|         |               |               |              |  |              |         |
|---------|---------------|---------------|--------------|--|--------------|---------|
| NORA50  | 0.04761904762 | 0.04761904762 | 0.1666666667 |  | 0.2          | #DIV/0! |
| NORA50  | 0.04761904762 | 0.04761904762 | 0            |  | inf          | #DIV/0! |
| NORA50  | 0.04761904762 | 0.04761904762 | 0.0555555556 |  | 0.7          | #DIV/0! |
| NORA50  | 0.1904761905  | 0.1904761905  | 0.0555555556 |  | 3.294117647  | #DIV/0! |
| NORA50  | 0.04761904762 | 0.04761904762 | 0            |  | inf          | #DIV/0! |
| NORA50  | 0.04761904762 | 0.04761904762 | 0.0555555556 |  | 0.7          | #DIV/0! |
| NORA50  | 0.04761904762 | 0.04761904762 | 0            |  | inf          | #DIV/0! |
| NORA50  | 0.04761904762 | 0.04761904762 | 0.0555555556 |  | 0.7          | #DIV/0! |
| NORA50  | 0.09523809524 | 0.09523809524 | 0.0555555556 |  | 1.473684211  | #DIV/0! |
| NORA58  | 0.1904761905  | 0.1904761905  | 0.0555555556 |  | 3.294117647  | #DIV/0! |
| NORA59  | 0.09523809524 | 0.09523809524 | 0.1111111111 |  | 0.6842105263 | #DIV/0! |
| NORA59  | 0.09523809524 | 0.09523809524 | 0.1111111111 |  | 0.6842105263 | #DIV/0! |
| NORA50  | 0.04761904762 | 0.04761904762 | 0.2222222222 |  | 0.1375       | #DIV/0! |
| NORA50  | 0.04761904762 | 0.04761904762 | 0.2222222222 |  | 0.1375       | #DIV/0! |
| NORA50  | 0.04761904762 | 0.04761904762 | 0.2222222222 |  | 0.1375       | #DIV/0! |
| NORA60  | 0.04761904762 | 0.04761904762 | 0            |  | inf          | #DIV/0! |
| NORA60  | 0.1428571429  | 0.1428571429  | 0.1666666667 |  | 0.6666666667 | #DIV/0! |
| NORA60  | 0.04761904762 | 0.04761904762 | 0.1111111111 |  | 0.325        | #DIV/0! |
| NORA60  | 0.04761904762 | 0.04761904762 | 0            |  | inf          | #DIV/0! |
| NORA60  | 0.09523809524 | 0.09523809524 | 0.0555555556 |  | 1.473684211  | #DIV/0! |
| NORA63  | 0.09523809524 | 0.09523809524 | 0.0555555556 |  | 1.473684211  | #DIV/0! |
| NORA63  | 0.04761904762 | 0.04761904762 | 0.0555555556 |  | 0.7          | #DIV/0! |
| NORA63  | 0.1904761905  | 0.1904761905  | 0.0555555556 |  | 3.294117647  | #DIV/0! |
| NORA63  | 0.1904761905  | 0.1904761905  | 0.0555555556 |  | 3.294117647  | #DIV/0! |
| NORA60  | 0.09523809524 | 0.09523809524 | 0.2222222222 |  | 0.2894736842 | #DIV/0! |
| NORA60  | 0.09523809524 | 0.09523809524 | 0.0555555556 |  | 1.473684211  | #DIV/0! |
| NORA60  | 0.04761904762 | 0.04761904762 | 0.0555555556 |  | 0.7          | #DIV/0! |
| NORA60  | 0             | 0             | 0.0555555556 |  | 0            | #DIV/0! |
| NORA60  | 0.1428571429  | 0.1428571429  | 0.1111111111 |  | 1.083333333  | #DIV/0! |
| NORA68  | 0.04761904762 | 0.04761904762 | 0.0555555556 |  | 0.7          | #DIV/0! |
| NORA70  | 0.04761904762 | 0.04761904762 | 0.0555555556 |  | 0.7          | #DIV/0! |
| NORA70  | 0.04761904762 | 0.04761904762 | 0            |  | inf          | #DIV/0! |
| NORA70  | 0.04761904762 | 0.04761904762 | 0            |  | inf          | #DIV/0! |
| NORA70  | 0             | 0             | 0.0555555556 |  | 0            | #DIV/0! |
| NORA70  | 0.09523809524 | 0.09523809524 | 0.0555555556 |  | 1.473684211  | #DIV/0! |
| NORA70  | 0.1428571429  | 0.1428571429  | 0            |  | inf          | #DIV/0! |
| NORA70  | 0             | 0             | 0.0555555556 |  | 0            | #DIV/0! |
| NORA70  | 0             | 0             | 0.0555555556 |  | 0            | #DIV/0! |
| NORA71  | 0.1428571429  | 0.1428571429  | 0.1666666667 |  | 0.6666666667 | #DIV/0! |
| NORA71  | 0.1428571429  | 0.1428571429  | 0.1666666667 |  | 0.6666666667 | #DIV/0! |
| NORA71  | 0.1428571429  | 0.1428571429  | 0.1666666667 |  | 0.6666666667 | #DIV/0! |
| NORA71  | 0.1428571429  | 0.1428571429  | 0.1666666667 |  | 0.6666666667 | #DIV/0! |
| NORA71  | 0.1428571429  | 0.1428571429  | 0.1666666667 |  | 0.6666666667 | #DIV/0! |
| NORA70  | 0.1904761905  | 0.1904761905  | 0.1111111111 |  | 1.529411765  | #DIV/0! |
| NORA73  | 0.04761904762 | 0.04761904762 | 0.1111111111 |  | 0.325        | #DIV/0! |
| NORA73  | 0.04761904762 | 0.04761904762 | 0.1111111111 |  | 0.325        | #DIV/0! |
| NORA74  | 0.04761904762 | 0.04761904762 | 0            |  | inf          | #DIV/0! |
| NORA74  | 0             | 0             | 0.0555555556 |  | 0            | #DIV/0! |
| ORA740  | 0.04761904762 | 0.04761904762 | 0.0555555556 |  | 0.7          | #DIV/0! |
| ORA740  | 0.04761904762 | 0.04761904762 | 0.0555555556 |  | 0.7          | #DIV/0! |
| NORA740 | 0.04761904762 | 0.04761904762 | 0            |  | inf          | #DIV/0! |

|        |               |               |               |  |              |         |
|--------|---------------|---------------|---------------|--|--------------|---------|
| NORA7  | 0             | 0             | 0.05555555556 |  | 0            | #DIV/0! |
| NORA75 | 0             | 0             | 0             |  |              | #DIV/0! |
| NORA7  | 0.2380952381  | 0.2380952381  | 0             |  | inf          | #DIV/0! |
| NORA77 | 0.04761904762 | 0.04761904762 | 0.05555555556 |  | 0.7          | #DIV/0! |
| NORA7  | 0.09523809524 | 0.09523809524 | 0.2222222222  |  | 0.2894736842 | #DIV/0! |
| NORA79 | 0.04761904762 | 0.04761904762 | 0             |  | inf          | #DIV/0! |
| NORA7  | 0.04761904762 | 0.04761904762 | 0             |  | inf          | #DIV/0! |
| NORA7  | 0.09523809524 | 0.09523809524 | 0.05555555556 |  | 1.473684211  | #DIV/0! |
| NORA80 | 0.04761904762 | 0.04761904762 | 0.1111111111  |  | 0.325        | #DIV/0! |
| NORA80 | 0             | 0             | 0.05555555556 |  | 0            | #DIV/0! |
| NORA80 | 0.04761904762 | 0.04761904762 | 0             |  | inf          | #DIV/0! |
| NORA80 | 0.04761904762 | 0.04761904762 | 0.1666666667  |  | 0.2          | #DIV/0! |
| NORA80 | 0.1904761905  | 0.1904761905  | 0.1111111111  |  | 1.529411765  | #DIV/0! |
| NORA8  | 0.09523809524 | 0.09523809524 | 0.05555555556 |  | 1.473684211  | #DIV/0! |
| NORA8  | 0.04761904762 | 0.04761904762 | 0.05555555556 |  | 0.7          | #DIV/0! |
| NORA8  | 0.09523809524 | 0.09523809524 | 0.2222222222  |  | 0.2894736842 | #DIV/0! |
| NORA8  | 0.1428571429  | 0.1428571429  | 0.05555555556 |  | 2.333333333  | #DIV/0! |
| NORA9  | 0.04761904762 | 0.04761904762 | 0.2222222222  |  | 0.1375       | #DIV/0! |
| NORA9  | 0.04761904762 | 0.04761904762 | 0             |  | inf          | #DIV/0! |
| NORA9  | 0.04761904762 | 0.04761904762 | 0.1111111111  |  | 0.325        | #DIV/0! |
| NORA9  | 0.04761904762 | 0.04761904762 | 0.1111111111  |  | 0.325        | #DIV/0! |
| NORA9  | 0.04761904762 | 0.04761904762 | 0             |  | inf          | #DIV/0! |
| NORA9  | 0.09523809524 | 0.09523809524 | 0             |  | inf          | #DIV/0! |
| NORA9  | 0.04761904762 | 0.04761904762 | 0             |  | inf          | #DIV/0! |
| NORA9  | 0.09523809524 | 0.09523809524 | 0.1111111111  |  | 0.6842105263 | #DIV/0! |
| NORA9  | 0.04761904762 | 0.04761904762 | 0.1111111111  |  | 0.325        | #DIV/0! |
| SNORC  | 0             | 0             | 0.05555555556 |  | 0            | #DIV/0! |
| NORD1  | 0             | 0             | 0.05555555556 |  | 0            | #DIV/0! |
| ORD10  | 0.04761904762 | 0.04761904762 | 0.1111111111  |  | 0.325        | #DIV/0! |
| ORD10  | 0.04761904762 | 0.04761904762 | 0.1111111111  |  | 0.325        | #DIV/0! |
| ORD10  | 0.04761904762 | 0.04761904762 | 0.1111111111  |  | 0.325        | #DIV/0! |
| NORD10 | 0.04761904762 | 0.04761904762 | 0             |  | inf          | #DIV/0! |
| NORD10 | 0.1428571429  | 0.1428571429  | 0.1111111111  |  | 1.083333333  | #DIV/0! |
| ORD10  | 0.1428571429  | 0.1428571429  | 0.1111111111  |  | 1.083333333  | #DIV/0! |
| NORD10 | 0.09523809524 | 0.09523809524 | 0.05555555556 |  | 1.473684211  | #DIV/0! |
| NORD11 | 0.1904761905  | 0.1904761905  | 0.05555555556 |  | 3.294117647  | #DIV/0! |
| NORD11 | 0.1428571429  | 0.1428571429  | 0.05555555556 |  | 2.333333333  | #DIV/0! |
| ORD11  | 0.1428571429  | 0.1428571429  | 0.05555555556 |  | 2.333333333  | #DIV/0! |
| NORD10 | 0.04761904762 | 0.04761904762 | 0             |  | inf          | #DIV/0! |
| NORD11 | 0             | 0             | 0.05555555556 |  | 0            | #DIV/0! |
| NORD11 | 0.1904761905  | 0.1904761905  | 0.05555555556 |  | 3.294117647  | #DIV/0! |
| NORD11 | 0.09523809524 | 0.09523809524 | 0.05555555556 |  | 1.473684211  | #DIV/0! |
| NORD10 | 0.09523809524 | 0.09523809524 | 0.1666666667  |  | 0.4210526316 | #DIV/0! |
| ORD12  | 0.09523809524 | 0.09523809524 | 0.05555555556 |  | 1.473684211  | #DIV/0! |
| ORD12  | 0.09523809524 | 0.09523809524 | 0.05555555556 |  | 1.473684211  | #DIV/0! |
| NORD12 | 0             | 0             | 0.05555555556 |  | 0            | #DIV/0! |
| NORD12 | 0.09523809524 | 0.09523809524 | 0             |  | inf          | #DIV/0! |
| NORD12 | 0.04761904762 | 0.04761904762 | 0.1111111111  |  | 0.325        | #DIV/0! |
| NORD12 | 0.04761904762 | 0.04761904762 | 0             |  | inf          | #DIV/0! |
| NORD12 | 0.04761904762 | 0.04761904762 | 0             |  | inf          | #DIV/0! |
| NORD12 | 0             | 0             | 0.05555555556 |  | 0            | #DIV/0! |

|        |               |               |              |  |              |         |
|--------|---------------|---------------|--------------|--|--------------|---------|
| NORD12 | 0.09523809524 | 0.09523809524 | 0.1111111111 |  | 0.6842105263 | #DIV/0! |
| NORD12 | 0.09523809524 | 0.09523809524 | 0.1666666667 |  | 0.4210526316 | #DIV/0! |
| NORD12 | 0.09523809524 | 0.09523809524 | 0.1666666667 |  | 0.4210526316 | #DIV/0! |
| NORD10 | 0.04761904762 | 0.04761904762 | 0.1111111111 |  | 0.325        | #DIV/0! |
| NORD13 | 0.09523809524 | 0.09523809524 | 0.1111111111 |  | 0.6842105263 | #DIV/0! |
| NORD13 | 0.04761904762 | 0.04761904762 | 0            |  | inf          | #DIV/0! |
| NORD13 | 0             | 0             | 0.0555555556 |  | 0            | #DIV/0! |
| NORD13 | 0.09523809524 | 0.09523809524 | 0.0555555556 |  | 1.473684211  | #DIV/0! |
| NORD13 | 0.04761904762 | 0.04761904762 | 0            |  | inf          | #DIV/0! |
| NORD13 | 0.1428571429  | 0.1428571429  | 0.1111111111 |  | 1.083333333  | #DIV/0! |
| NORD13 | 0.09523809524 | 0.09523809524 | 0.0555555556 |  | 1.473684211  | #DIV/0! |
| NORD13 | 0.04761904762 | 0.04761904762 | 0            |  | inf          | #DIV/0! |
| NORD13 | 0             | 0             | 0.1111111111 |  | 0            | #DIV/0! |
| ORD13  | 0.09523809524 | 0.09523809524 | 0.1666666667 |  | 0.4210526316 | #DIV/0! |
| ORD13  | 0.09523809524 | 0.09523809524 | 0.1666666667 |  | 0.4210526316 | #DIV/0! |
| NORD13 | 0.1904761905  | 0.1904761905  | 0.0555555556 |  | 3.294117647  | #DIV/0! |
| NORD13 | 0.04761904762 | 0.04761904762 | 0.0555555556 |  | 0.7          | #DIV/0! |
| NORD13 | 0.04761904762 | 0.04761904762 | 0.0555555556 |  | 0.7          | #DIV/0! |
| NORD13 | 0.1428571429  | 0.1428571429  | 0.0555555556 |  | 2.333333333  | #DIV/0! |
| NORD13 | 0.09523809524 | 0.09523809524 | 0            |  | inf          | #DIV/0! |
| NORD14 | 0             | 0             | 0.1111111111 |  | 0            | #DIV/0! |
| ORD14  | 0.1428571429  | 0.1428571429  | 0.0555555556 |  | 2.333333333  | #DIV/0! |
| ORD14  | 0.1428571429  | 0.1428571429  | 0.0555555556 |  | 2.333333333  | #DIV/0! |
| NORD14 | 0.04761904762 | 0.04761904762 | 0.1666666667 |  | 0.2          | #DIV/0! |
| NORD14 | 0             | 0             | 0.0555555556 |  | 0            | #DIV/0! |
| NORD14 | 0             | 0             | 0.0555555556 |  | 0            | #DIV/0! |
| NORD14 | 0.04761904762 | 0.04761904762 | 0.0555555556 |  | 0.7          | #DIV/0! |
| NORD14 | 0.09523809524 | 0.09523809524 | 0            |  | inf          | #DIV/0! |
| NORD14 | 0.04761904762 | 0.04761904762 | 0            |  | inf          | #DIV/0! |
| NORD14 | 0.04761904762 | 0.04761904762 | 0.1111111111 |  | 0.325        | #DIV/0! |
| NORD15 | 0.04761904762 | 0.04761904762 | 0.2222222222 |  | 0.1375       | #DIV/0! |
| NORD15 | 0.04761904762 | 0.04761904762 | 0.0555555556 |  | 0.7          | #DIV/0! |
| NORD15 | 0.1428571429  | 0.1428571429  | 0.1666666667 |  | 0.6666666667 | #DIV/0! |
| NORD15 | 0.09523809524 | 0.09523809524 | 0.0555555556 |  | 1.473684211  | #DIV/0! |
| NORD15 | 0.09523809524 | 0.09523809524 | 0.0555555556 |  | 1.473684211  | #DIV/0! |
| NORD15 | 0.2380952381  | 0.2380952381  | 0            |  | inf          | #DIV/0! |
| NORD15 | 0.04761904762 | 0.04761904762 | 0.1111111111 |  | 0.325        | #DIV/0! |
| NORD10 | 0.04761904762 | 0.04761904762 | 0.0555555556 |  | 0.7          | #DIV/0! |
| NORD16 | 0.04761904762 | 0.04761904762 | 0.0555555556 |  | 0.7          | #DIV/0! |
| NORD16 | 0.04761904762 | 0.04761904762 | 0.0555555556 |  | 0.7          | #DIV/0! |
| NORD16 | 0.04761904762 | 0.04761904762 | 0.0555555556 |  | 0.7          | #DIV/0! |
| NORD16 | 0.04761904762 | 0.04761904762 | 0.1666666667 |  | 0.2          | #DIV/0! |
| NORD16 | 0             | 0             | 0            |  |              | #DIV/0! |
| NORD16 | 0             | 0             | 0.1111111111 |  | 0            | #DIV/0! |
| NORD16 | 0.1428571429  | 0.1428571429  | 0.1666666667 |  | 0.6666666667 | #DIV/0! |
| NORD10 | 0.1904761905  | 0.1904761905  | 0.1111111111 |  | 1.529411765  | #DIV/0! |
| NORD17 | 0.04761904762 | 0.04761904762 | 0.0555555556 |  | 0.7          | #DIV/0! |
| NORD17 | 0.1904761905  | 0.1904761905  | 0.0555555556 |  | 3.294117647  | #DIV/0! |
| NORD17 | 0.1904761905  | 0.1904761905  | 0.1111111111 |  | 1.529411765  | #DIV/0! |
| NORD17 | 0.04761904762 | 0.04761904762 | 0.0555555556 |  | 0.7          | #DIV/0! |
| NORD18 | 0.04761904762 | 0.04761904762 | 0.0555555556 |  | 0.7          | #DIV/0! |





|        |               |               |               |  |              |         |
|--------|---------------|---------------|---------------|--|--------------|---------|
| NORD5  | 0             | 0             | 0.05555555556 |  | 0            | #DIV/0! |
| NORD53 | 0             | 0             | 0.05555555556 |  | 0            | #DIV/0! |
| NORD5  | 0.1428571429  | 0.1428571429  | 0.1111111111  |  | 1.083333333  | #DIV/0! |
| NORD5  | 0.04761904762 | 0.04761904762 | 0.05555555556 |  | 0.7          | #DIV/0! |
| NORD5  | 0.1904761905  | 0.1904761905  | 0.05555555556 |  | 3.294117647  | #DIV/0! |
| NORD5  | 0.1904761905  | 0.1904761905  | 0.05555555556 |  | 3.294117647  | #DIV/0! |
| NORD58 | 0.04761904762 | 0.04761904762 | 0             |  | inf          | #DIV/0! |
| NORD58 | 0.04761904762 | 0.04761904762 | 0             |  | inf          | #DIV/0! |
| NORD58 | 0.04761904762 | 0.04761904762 | 0             |  | inf          | #DIV/0! |
| NORD59 | 0.1428571429  | 0.1428571429  | 0.05555555556 |  | 2.333333333  | #DIV/0! |
| NORD59 | 0.1428571429  | 0.1428571429  | 0.05555555556 |  | 2.333333333  | #DIV/0! |
| NORD6  | 0.09523809524 | 0.09523809524 | 0.2222222222  |  | 0.2894736842 | #DIV/0! |
| NORD62 | 0.09523809524 | 0.09523809524 | 0.05555555556 |  | 1.473684211  | #DIV/0! |
| NORD62 | 0.09523809524 | 0.09523809524 | 0.05555555556 |  | 1.473684211  | #DIV/0! |
| NORD6  | 0.04761904762 | 0.04761904762 | 0             |  | inf          | #DIV/0! |
| NORD63 | 0.04761904762 | 0.04761904762 | 0             |  | inf          | #DIV/0! |
| NORD6  | 0.04761904762 | 0.04761904762 | 0.05555555556 |  | 0.7          | #DIV/0! |
| NORD65 | 0.09523809524 | 0.09523809524 | 0.1666666667  |  | 0.4210526316 | #DIV/0! |
| NORD65 | 0.04761904762 | 0.04761904762 | 0.1666666667  |  | 0.2          | #DIV/0! |
| NORD6  | 0.1428571429  | 0.1428571429  | 0.05555555556 |  | 2.333333333  | #DIV/0! |
| NORD6  | 0             | 0             | 0.05555555556 |  | 0            | #DIV/0! |
| NORD6  | 0.09523809524 | 0.09523809524 | 0             |  | inf          | #DIV/0! |
| NORD7  | 0.04761904762 | 0.04761904762 | 0             |  | inf          | #DIV/0! |
| NORD7  | 0.09523809524 | 0.09523809524 | 0.05555555556 |  | 1.473684211  | #DIV/0! |
| NORD7  | 0.09523809524 | 0.09523809524 | 0.05555555556 |  | 1.473684211  | #DIV/0! |
| NORD7  | 0.04761904762 | 0.04761904762 | 0             |  | inf          | #DIV/0! |
| NORD7  | 0.04761904762 | 0.04761904762 | 0.05555555556 |  | 0.7          | #DIV/0! |
| NORD73 | 0             | 0             | 0.05555555556 |  | 0            | #DIV/0! |
| NORD73 | 0             | 0             | 0.05555555556 |  | 0            | #DIV/0! |
| NORD7  | 0.1428571429  | 0.1428571429  | 0             |  | inf          | #DIV/0! |
| NORD74 | 0.04761904762 | 0.04761904762 | 0.1111111111  |  | 0.325        | #DIV/0! |
| NORD7  | 0.1428571429  | 0.1428571429  | 0             |  | inf          | #DIV/0! |
| NORD7  | 0.1428571429  | 0.1428571429  | 0             |  | inf          | #DIV/0! |
| NORD7  | 0.1428571429  | 0.1428571429  | 0             |  | inf          | #DIV/0! |
| NORD77 | 0.1904761905  | 0.1904761905  | 0.1111111111  |  | 1.529411765  | #DIV/0! |
| NORD7  | 0.1428571429  | 0.1428571429  | 0             |  | inf          | #DIV/0! |
| NORD7  | 0.1428571429  | 0.1428571429  | 0             |  | inf          | #DIV/0! |
| NORD8  | 0.1428571429  | 0.1428571429  | 0             |  | inf          | #DIV/0! |
| NORD8  | 0.1428571429  | 0.1428571429  | 0             |  | inf          | #DIV/0! |
| NORD8  | 0             | 0             | 0.05555555556 |  | 0            | #DIV/0! |
| NORD83 | 0             | 0             | 0.1111111111  |  | 0            | #DIV/0! |
| NORD83 | 0             | 0             | 0.1111111111  |  | 0            | #DIV/0! |
| NORD8  | 0.04761904762 | 0.04761904762 | 0             |  | inf          | #DIV/0! |
| NORD8  | 0.1904761905  | 0.1904761905  | 0.05555555556 |  | 3.294117647  | #DIV/0! |
| NORD8  | 0.1428571429  | 0.1428571429  | 0.1666666667  |  | 0.6666666667 | #DIV/0! |
| NORD88 | 0.09523809524 | 0.09523809524 | 0.05555555556 |  | 1.473684211  | #DIV/0! |
| NORD88 | 0.09523809524 | 0.09523809524 | 0.05555555556 |  | 1.473684211  | #DIV/0! |
| NORD88 | 0.09523809524 | 0.09523809524 | 0.05555555556 |  | 1.473684211  | #DIV/0! |
| NORD8  | 0             | 0             | 0.05555555556 |  | 0            | #DIV/0! |
| NORD9  | 0.09523809524 | 0.09523809524 | 0.05555555556 |  | 1.473684211  | #DIV/0! |
| NORD91 | 0             | 0             | 0.1111111111  |  | 0            | #DIV/0! |

|         |               |               |              |  |              |         |
|---------|---------------|---------------|--------------|--|--------------|---------|
| NORD91  | 0             | 0             | 0.1111111111 |  | 0            | #DIV/0! |
| NORD9   | 0             | 0             | 0.0555555556 |  | 0            | #DIV/0! |
| NORD90  | 0.04761904762 | 0.04761904762 | 0.1666666667 |  | 0.2          | #DIV/0! |
| NORD9   | 0             | 0             | 0.0555555556 |  | 0            | #DIV/0! |
| NORD90  | 0.09523809524 | 0.09523809524 | 0.0555555556 |  | 1.473684211  | #DIV/0! |
| NORD96  | 0.09523809524 | 0.09523809524 | 0.0555555556 |  | 1.473684211  | #DIV/0! |
| NORD9   | 0.1904761905  | 0.1904761905  | 0.0555555556 |  | 3.294117647  | #DIV/0! |
| NORD90  | 0.04761904762 | 0.04761904762 | 0.1111111111 |  | 0.325        | #DIV/0! |
| SNPH    | 0.1904761905  | 0.1904761905  | 0.1111111111 |  | 1.529411765  | #DIV/0! |
| SNRK    | 0.04761904762 | 0.04761904762 | 0            |  | inf          | #DIV/0! |
| NRK-AS  | 0.04761904762 | 0.04761904762 | 0            |  | inf          | #DIV/0! |
| NRNP20  | 0             | 0             | 0.1111111111 |  | 0            | #DIV/0! |
| NRNP20  | 0.04761904762 | 0.04761904762 | 0.2222222222 |  | 0.1375       | #DIV/0! |
| NRNP2   | 0             | 0             | 0.0555555556 |  | 0            | #DIV/0! |
| NRNP30  | 0.04761904762 | 0.04761904762 | 0.1111111111 |  | 0.325        | #DIV/0! |
| NRNP40  | 0.04761904762 | 0.04761904762 | 0.1111111111 |  | 0.325        | #DIV/0! |
| NRNP70  | 0.09523809524 | 0.09523809524 | 0.1111111111 |  | 0.6842105263 | #DIV/0! |
| SNRPA1  | 0.04761904762 | 0.04761904762 | 0.0555555556 |  | 0.7          | #DIV/0! |
| SNRPB   | 0.1904761905  | 0.1904761905  | 0.0555555556 |  | 3.294117647  | #DIV/0! |
| SNRPB2  | 0.1904761905  | 0.1904761905  | 0.1111111111 |  | 1.529411765  | #DIV/0! |
| SNRPC   | 0.04761904762 | 0.04761904762 | 0            |  | inf          | #DIV/0! |
| SNRPD1  | 0.04761904762 | 0.04761904762 | 0.1111111111 |  | 0.325        | #DIV/0! |
| SNRPD2  | 0.09523809524 | 0.09523809524 | 0.1111111111 |  | 0.6842105263 | #DIV/0! |
| NRPD2F  | 0.1428571429  | 0.1428571429  | 0            |  | inf          | #DIV/0! |
| SNRPD3  | 0.04761904762 | 0.04761904762 | 0.1111111111 |  | 0.325        | #DIV/0! |
| SNRPE   | 0.2380952381  | 0.2380952381  | 0            |  | inf          | #DIV/0! |
| SNRPF   | 0.04761904762 | 0.04761904762 | 0.0555555556 |  | 0.7          | #DIV/0! |
| SNRPG   | 0             | 0             | 0.0555555556 |  | 0            | #DIV/0! |
| SNTA1   | 0.09523809524 | 0.09523809524 | 0.1111111111 |  | 0.6842105263 | #DIV/0! |
| SNTB1   | 0.09523809524 | 0.09523809524 | 0.1111111111 |  | 0.6842105263 | #DIV/0! |
| SNTB2   | 0.1428571429  | 0.1428571429  | 0.0555555556 |  | 2.333333333  | #DIV/0! |
| SNTG1   | 0.09523809524 | 0.09523809524 | 0.1111111111 |  | 0.6842105263 | #DIV/0! |
| SNTG2   | 0             | 0             | 0.0555555556 |  | 0            | #DIV/0! |
| NTG2-AS | 0             | 0             | 0.0555555556 |  | 0            | #DIV/0! |
| SNTN    | 0.04761904762 | 0.04761904762 | 0            |  | inf          | #DIV/0! |
| SNU13   | 0             | 0             | 0.1111111111 |  | 0            | #DIV/0! |
| SNUPN   | 0.04761904762 | 0.04761904762 | 0.0555555556 |  | 0.7          | #DIV/0! |
| SNX1    | 0.04761904762 | 0.04761904762 | 0.0555555556 |  | 0.7          | #DIV/0! |
| SNX10   | 0.04761904762 | 0.04761904762 | 0.2222222222 |  | 0.1375       | #DIV/0! |
| SNX11   | 0.1428571429  | 0.1428571429  | 0            |  | inf          | #DIV/0! |
| SNX13   | 0.04761904762 | 0.04761904762 | 0.2222222222 |  | 0.1375       | #DIV/0! |
| SNX16   | 0.1428571429  | 0.1428571429  | 0.1111111111 |  | 1.083333333  | #DIV/0! |
| SNX18   | 0.04761904762 | 0.04761904762 | 0.0555555556 |  | 0.7          | #DIV/0! |
| SNX2    | 0.04761904762 | 0.04761904762 | 0            |  | inf          | #DIV/0! |
| SNX20   | 0.04761904762 | 0.04761904762 | 0            |  | inf          | #DIV/0! |
| SNX21   | 0.1428571429  | 0.1428571429  | 0.1666666667 |  | 0.6666666667 | #DIV/0! |
| SNX22   | 0.04761904762 | 0.04761904762 | 0.0555555556 |  | 0.7          | #DIV/0! |
| SNX24   | 0.04761904762 | 0.04761904762 | 0            |  | inf          | #DIV/0! |
| SNX25   | 0             | 0             | 0.0555555556 |  | 0            | #DIV/0! |
| SNX27   | 0.1428571429  | 0.1428571429  | 0.0555555556 |  | 2.333333333  | #DIV/0! |
| SNX29   | 0.04761904762 | 0.04761904762 | 0            |  | inf          | #DIV/0! |

|         |               |               |               |  |              |         |
|---------|---------------|---------------|---------------|--|--------------|---------|
| SNX29P1 | 0.04761904762 | 0.04761904762 | 0             |  | inf          | #DIV/0! |
| SNX29P2 | 0.04761904762 | 0.04761904762 | 0             |  | inf          | #DIV/0! |
| SNX3    | 0             | 0             | 0             |  |              | #DIV/0! |
| SNX30   | 0.04761904762 | 0.04761904762 | 0.05555555556 |  | 0.7          | #DIV/0! |
| SNX31   | 0.1904761905  | 0.1904761905  | 0.1111111111  |  | 1.529411765  | #DIV/0! |
| SNX33   | 0.04761904762 | 0.04761904762 | 0.05555555556 |  | 0.7          | #DIV/0! |
| SNX4    | 0.04761904762 | 0.04761904762 | 0.05555555556 |  | 0.7          | #DIV/0! |
| SNX5    | 0.1904761905  | 0.1904761905  | 0.1111111111  |  | 1.529411765  | #DIV/0! |
| SNX6    | 0.09523809524 | 0.09523809524 | 0             |  | inf          | #DIV/0! |
| SNX7    | 0.04761904762 | 0.04761904762 | 0.05555555556 |  | 0.7          | #DIV/0! |
| SNX8    | 0.04761904762 | 0.04761904762 | 0.1666666667  |  | 0.2          | #DIV/0! |
| SOAT1   | 0.1428571429  | 0.1428571429  | 0             |  | inf          | #DIV/0! |
| SOAT2   | 0.04761904762 | 0.04761904762 | 0.05555555556 |  | 0.7          | #DIV/0! |
| SOBP    | 0             | 0             | 0             |  |              | #DIV/0! |
| SOCS1   | 0.04761904762 | 0.04761904762 | 0             |  | inf          | #DIV/0! |
| SOCS2   | 0.04761904762 | 0.04761904762 | 0.05555555556 |  | 0.7          | #DIV/0! |
| SOCS2-A | 0.04761904762 | 0.04761904762 | 0.05555555556 |  | 0.7          | #DIV/0! |
| SOCS3   | 0.04761904762 | 0.04761904762 | 0             |  | inf          | #DIV/0! |
| SOCS4   | 0.04761904762 | 0.04761904762 | 0             |  | inf          | #DIV/0! |
| SOCS5   | 0             | 0             | 0.05555555556 |  | 0            | #DIV/0! |
| SOD1    | 0.04761904762 | 0.04761904762 | 0.1111111111  |  | 0.325        | #DIV/0! |
| SOGA1   | 0.09523809524 | 0.09523809524 | 0.1111111111  |  | 0.6842105263 | #DIV/0! |
| SOHLH   | 0.04761904762 | 0.04761904762 | 0             |  | inf          | #DIV/0! |
| SON     | 0.04761904762 | 0.04761904762 | 0.1111111111  |  | 0.325        | #DIV/0! |
| SORBS1  | 0.1428571429  | 0.1428571429  | 0             |  | inf          | #DIV/0! |
| SORBS2  | 0             | 0             | 0.05555555556 |  | 0            | #DIV/0! |
| SORBS3  | 0.09523809524 | 0.09523809524 | 0.1111111111  |  | 0.6842105263 | #DIV/0! |
| SORCS1  | 0.1428571429  | 0.1428571429  | 0             |  | inf          | #DIV/0! |
| SORCS3  | 0.1428571429  | 0.1428571429  | 0             |  | inf          | #DIV/0! |
| RCS3-A  | 0.1428571429  | 0.1428571429  | 0             |  | inf          | #DIV/0! |
| SORD    | 0.04761904762 | 0.04761904762 | 0             |  | inf          | #DIV/0! |
| SORT1   | 0.04761904762 | 0.04761904762 | 0.05555555556 |  | 0.7          | #DIV/0! |
| SOS1    | 0             | 0             | 0.05555555556 |  | 0            | #DIV/0! |
| SOS2    | 0.04761904762 | 0.04761904762 | 0             |  | inf          | #DIV/0! |
| SOST    | 0.09523809524 | 0.09523809524 | 0             |  | inf          | #DIV/0! |
| OSTDC   | 0.04761904762 | 0.04761904762 | 0.2222222222  |  | 0.1375       | #DIV/0! |
| OWAH    | 0.04761904762 | 0.04761904762 | 0             |  | inf          | #DIV/0! |
| OWAH    | 0.04761904762 | 0.04761904762 | 0.05555555556 |  | 0.7          | #DIV/0! |
| OWAH    | 0             | 0             | 0.05555555556 |  | 0            | #DIV/0! |
| SOX10   | 0             | 0             | 0.1111111111  |  | 0            | #DIV/0! |
| SOX11   | 0             | 0             | 0.05555555556 |  | 0            | #DIV/0! |
| SOX12   | 0.1904761905  | 0.1904761905  | 0.05555555556 |  | 3.294117647  | #DIV/0! |
| SOX13   | 0.2380952381  | 0.2380952381  | 0             |  | inf          | #DIV/0! |
| SOX14   | 0.1428571429  | 0.1428571429  | 0.05555555556 |  | 2.333333333  | #DIV/0! |
| SOX15   | 0             | 0             | 0.05555555556 |  | 0            | #DIV/0! |
| SOX17   | 0.1428571429  | 0.1428571429  | 0.1111111111  |  | 1.083333333  | #DIV/0! |
| SOX18   | 0.1428571429  | 0.1428571429  | 0.2222222222  |  | 0.4583333333 | #DIV/0! |
| SOX2    | 0.1428571429  | 0.1428571429  | 0.05555555556 |  | 2.333333333  | #DIV/0! |
| SOX2-O  | 0.1428571429  | 0.1428571429  | 0.05555555556 |  | 2.333333333  | #DIV/0! |
| SOX30   | 0.04761904762 | 0.04761904762 | 0.05555555556 |  | 0.7          | #DIV/0! |
| SOX5    | 0.04761904762 | 0.04761904762 | 0.05555555556 |  | 0.7          | #DIV/0! |

|         |               |               |               |  |              |         |
|---------|---------------|---------------|---------------|--|--------------|---------|
| OX5-AS  | 0.04761904762 | 0.04761904762 | 0.05555555556 |  | 0.7          | #DIV/0! |
| SOX7    | 0.09523809524 | 0.09523809524 | 0.11111111111 |  | 0.6842105263 | #DIV/0! |
| SOX8    | 0.04761904762 | 0.04761904762 | 0.22222222222 |  | 0.1375       | #DIV/0! |
| SOX9    | 0             | 0             | 0             |  |              | #DIV/0! |
| OX9-AS  | 0             | 0             | 0             |  |              | #DIV/0! |
| SP1     | 0.04761904762 | 0.04761904762 | 0.05555555556 |  | 0.7          | #DIV/0! |
| SP100   | 0             | 0             | 0.05555555556 |  | 0            | #DIV/0! |
| SP110   | 0             | 0             | 0.05555555556 |  | 0            | #DIV/0! |
| SP140   | 0             | 0             | 0.05555555556 |  | 0            | #DIV/0! |
| SP140L  | 0             | 0             | 0.05555555556 |  | 0            | #DIV/0! |
| SP2     | 0.1428571429  | 0.1428571429  | 0             |  | inf          | #DIV/0! |
| SP2-AS1 | 0.1428571429  | 0.1428571429  | 0             |  | inf          | #DIV/0! |
| SP3     | 0             | 0             | 0.11111111111 |  | 0            | #DIV/0! |
| SP4     | 0.04761904762 | 0.04761904762 | 0.16666666667 |  | 0.2          | #DIV/0! |
| SP5     | 0             | 0             | 0.05555555556 |  | 0            | #DIV/0! |
| SP6     | 0.1428571429  | 0.1428571429  | 0             |  | inf          | #DIV/0! |
| SP7     | 0.04761904762 | 0.04761904762 | 0.05555555556 |  | 0.7          | #DIV/0! |
| SP8     | 0.04761904762 | 0.04761904762 | 0.16666666667 |  | 0.2          | #DIV/0! |
| SP9     | 0             | 0             | 0.11111111111 |  | 0            | #DIV/0! |
| SPAAR   | 0.09523809524 | 0.09523809524 | 0.05555555556 |  | 1.473684211  | #DIV/0! |
| SPACA3  | 0.04761904762 | 0.04761904762 | 0             |  | inf          | #DIV/0! |
| SPACA4  | 0.09523809524 | 0.09523809524 | 0.11111111111 |  | 0.6842105263 | #DIV/0! |
| SPACA9  | 0.04761904762 | 0.04761904762 | 0             |  | inf          | #DIV/0! |
| SPAG1   | 0.1904761905  | 0.1904761905  | 0.11111111111 |  | 1.529411765  | #DIV/0! |
| SPAG11  | 0.09523809524 | 0.09523809524 | 0.22222222222 |  | 0.2894736842 | #DIV/0! |
| SPAG11  | 0.09523809524 | 0.09523809524 | 0.22222222222 |  | 0.2894736842 | #DIV/0! |
| SPAG16  | 0             | 0             | 0.05555555556 |  | 0            | #DIV/0! |
| SPAG17  | 0.04761904762 | 0.04761904762 | 0.05555555556 |  | 0.7          | #DIV/0! |
| SPAG4   | 0.09523809524 | 0.09523809524 | 0.11111111111 |  | 0.6842105263 | #DIV/0! |
| SPAG5   | 0.04761904762 | 0.04761904762 | 0.05555555556 |  | 0.7          | #DIV/0! |
| PAG5-AS | 0.04761904762 | 0.04761904762 | 0.05555555556 |  | 0.7          | #DIV/0! |
| SPAG6   | 0.09523809524 | 0.09523809524 | 0.11111111111 |  | 0.6842105263 | #DIV/0! |
| SPAG7   | 0             | 0             | 0.11111111111 |  | 0            | #DIV/0! |
| SPAG8   | 0.09523809524 | 0.09523809524 | 0.05555555556 |  | 1.473684211  | #DIV/0! |
| SPAG9   | 0.04761904762 | 0.04761904762 | 0             |  | inf          | #DIV/0! |
| SPAM1   | 0.04761904762 | 0.04761904762 | 0.05555555556 |  | 0.7          | #DIV/0! |
| PARCL   | 0             | 0             | 0.05555555556 |  | 0            | #DIV/0! |
| SPAST   | 0.1428571429  | 0.1428571429  | 0             |  | inf          | #DIV/0! |
| SPATA   | 0.04761904762 | 0.04761904762 | 0.05555555556 |  | 0.7          | #DIV/0! |
| SPATA1  | 0.04761904762 | 0.04761904762 | 0             |  | inf          | #DIV/0! |
| SPATA1  | 0.1904761905  | 0.1904761905  | 0.05555555556 |  | 3.294117647  | #DIV/0! |
| SPATA1  | 0.1428571429  | 0.1428571429  | 0             |  | inf          | #DIV/0! |
| ATA17-A | 0.1428571429  | 0.1428571429  | 0             |  | inf          | #DIV/0! |
| SPATA1  | 0.2380952381  | 0.2380952381  | 0.05555555556 |  | 4.375        | #DIV/0! |
| SPATA2  | 0.09523809524 | 0.09523809524 | 0.16666666667 |  | 0.4210526316 | #DIV/0! |
| SPATA2  | 0.09523809524 | 0.09523809524 | 0             |  | inf          | #DIV/0! |
| SPATA2  | 0.04761904762 | 0.04761904762 | 0.11111111111 |  | 0.325        | #DIV/0! |
| SPATA2  | 0             | 0             | 0.11111111111 |  | 0            | #DIV/0! |
| SPATA2  | 0.04761904762 | 0.04761904762 | 0             |  | inf          | #DIV/0! |
| SPATA2  | 0.1428571429  | 0.1428571429  | 0.16666666667 |  | 0.6666666667 | #DIV/0! |
| SPATA2  | 0.09523809524 | 0.09523809524 | 0             |  | inf          | #DIV/0! |

|        |               |               |               |  |              |         |
|--------|---------------|---------------|---------------|--|--------------|---------|
| SPATA3 | 0             | 0             | 0.05555555556 |  | 0            | #DIV/0! |
| ATA3-A | 0             | 0             | 0.05555555556 |  | 0            | #DIV/0! |
| PATA31 | 0.04761904762 | 0.04761904762 | 0.1111111111  |  | 0.325        | #DIV/0! |
| PATA31 | 0.04761904762 | 0.04761904762 | 0.1111111111  |  | 0.325        | #DIV/0! |
| PATA31 | 0.09523809524 | 0.09523809524 | 0.2222222222  |  | 0.2894736842 | #DIV/0! |
| PATA31 | 0.1428571429  | 0.1428571429  | 0.05555555556 |  | 2.333333333  | #DIV/0! |
| PATA31 | 0.09523809524 | 0.09523809524 | 0.2222222222  |  | 0.2894736842 | #DIV/0! |
| PATA31 | 0             | 0             | 0.05555555556 |  | 0            | #DIV/0! |
| PATA31 | 0             | 0             | 0.05555555556 |  | 0            | #DIV/0! |
| PATA31 | 0             | 0             | 0.05555555556 |  | 0            | #DIV/0! |
| PATA31 | 0             | 0             | 0.05555555556 |  | 0            | #DIV/0! |
| PATA31 | 0             | 0             | 0.05555555556 |  | 0            | #DIV/0! |
| ATA31  | 0             | 0             | 0.05555555556 |  | 0            | #DIV/0! |
| PATA31 | 0             | 0             | 0.05555555556 |  | 0            | #DIV/0! |
| SPATA3 | 0.1428571429  | 0.1428571429  | 0             |  | inf          | #DIV/0! |
| SPATA3 | 0.09523809524 | 0.09523809524 | 0             |  | inf          | #DIV/0! |
| SPATA4 | 0             | 0             | 0.05555555556 |  | 0            | #DIV/0! |
| SPATA4 | 0.04761904762 | 0.04761904762 | 0.05555555556 |  | 0.7          | #DIV/0! |
| SPATA4 | 0.04761904762 | 0.04761904762 | 0.05555555556 |  | 0.7          | #DIV/0! |
| SPATA4 | 0.09523809524 | 0.09523809524 | 0             |  | inf          | #DIV/0! |
| SPATA4 | 0.1428571429  | 0.1428571429  | 0             |  | inf          | #DIV/0! |
| SPATA4 | 0.09523809524 | 0.09523809524 | 0.2222222222  |  | 0.2894736842 | #DIV/0! |
| SPATA5 | 0             | 0             | 0.05555555556 |  | 0            | #DIV/0! |
| PATA5  | 0.04761904762 | 0.04761904762 | 0             |  | inf          | #DIV/0! |
| SPATA6 | 0             | 0             | 0.05555555556 |  | 0            | #DIV/0! |
| SPATA6 | 0.04761904762 | 0.04761904762 | 0.05555555556 |  | 0.7          | #DIV/0! |
| SPATA8 | 0.04761904762 | 0.04761904762 | 0.05555555556 |  | 0.7          | #DIV/0! |
| ATA8-A | 0.04761904762 | 0.04761904762 | 0.05555555556 |  | 0.7          | #DIV/0! |
| SPATA9 | 0.04761904762 | 0.04761904762 | 0             |  | inf          | #DIV/0! |
| SPATC1 | 0.04761904762 | 0.04761904762 | 0.1666666667  |  | 0.2          | #DIV/0! |
| PATC1  | 0.04761904762 | 0.04761904762 | 0.1111111111  |  | 0.325        | #DIV/0! |
| SPATS1 | 0.04761904762 | 0.04761904762 | 0.05555555556 |  | 0.7          | #DIV/0! |
| SPATS2 | 0.04761904762 | 0.04761904762 | 0.05555555556 |  | 0.7          | #DIV/0! |
| SPATS2 | 0             | 0             | 0.05555555556 |  | 0            | #DIV/0! |
| SPC24  | 0.1428571429  | 0.1428571429  | 0.1111111111  |  | 1.083333333  | #DIV/0! |
| SPC25  | 0.04761904762 | 0.04761904762 | 0.05555555556 |  | 0.7          | #DIV/0! |
| SPCS3  | 0             | 0             | 0.05555555556 |  | 0            | #DIV/0! |
| SPDEF  | 0.04761904762 | 0.04761904762 | 0             |  | inf          | #DIV/0! |
| SPDL1  | 0             | 0             | 0.05555555556 |  | 0            | #DIV/0! |
| SPDYA  | 0             | 0             | 0.05555555556 |  | 0            | #DIV/0! |
| SPDYE1 | 0.04761904762 | 0.04761904762 | 0.1666666667  |  | 0.2          | #DIV/0! |
| PDYE10 | 0.1428571429  | 0.1428571429  | 0.1666666667  |  | 0.6666666667 | #DIV/0! |
| SPDYE1 | 0.1428571429  | 0.1428571429  | 0.1666666667  |  | 0.6666666667 | #DIV/0! |
| PDYE13 | 0.1428571429  | 0.1428571429  | 0.1666666667  |  | 0.6666666667 | #DIV/0! |
| PDYE14 | 0.1428571429  | 0.1428571429  | 0.1666666667  |  | 0.6666666667 | #DIV/0! |
| PDYE15 | 0.1428571429  | 0.1428571429  | 0.1666666667  |  | 0.6666666667 | #DIV/0! |
| PDYE1  | 0.09523809524 | 0.09523809524 | 0.1111111111  |  | 0.6842105263 | #DIV/0! |
| PDYE1  | 0.1428571429  | 0.1428571429  | 0.1666666667  |  | 0.6666666667 | #DIV/0! |
| PDYE1  | 0.04761904762 | 0.04761904762 | 0.1111111111  |  | 0.325        | #DIV/0! |
| SPDYE2 | 0.04761904762 | 0.04761904762 | 0.05555555556 |  | 0.7          | #DIV/0! |
| PDYE2  | 0.04761904762 | 0.04761904762 | 0.05555555556 |  | 0.7          | #DIV/0! |

|        |               |               |               |  |               |         |
|--------|---------------|---------------|---------------|--|---------------|---------|
| SPDYE3 | 0.04761904762 | 0.04761904762 | 0.05555555556 |  | 0.7           | #DIV/0! |
| SPDYE4 | 0.04761904762 | 0.04761904762 | 0.05555555556 |  | 0.7           | #DIV/0! |
| SPDYE5 | 0.1428571429  | 0.1428571429  | 0.16666666667 |  | 0.66666666667 | #DIV/0! |
| SPDYE6 | 0.04761904762 | 0.04761904762 | 0.05555555556 |  | 0.7           | #DIV/0! |
| PDYE7  | 0.1428571429  | 0.1428571429  | 0.11111111111 |  | 1.083333333   | #DIV/0! |
| PDYE8  | 0.1428571429  | 0.1428571429  | 0.16666666667 |  | 0.66666666667 | #DIV/0! |
| SPECC1 | 0.09523809524 | 0.09523809524 | 0.05555555556 |  | 1.473684211   | #DIV/0! |
| PECC1  | 0.04761904762 | 0.04761904762 | 0.11111111111 |  | 0.325         | #DIV/0! |
| IL-ADC | 0.04761904762 | 0.04761904762 | 0.11111111111 |  | 0.325         | #DIV/0! |
| SPEF1  | 0.1904761905  | 0.1904761905  | 0.05555555556 |  | 3.294117647   | #DIV/0! |
| SPEF2  | 0.04761904762 | 0.04761904762 | 0.05555555556 |  | 0.7           | #DIV/0! |
| SPEG   | 0             | 0             | 0.05555555556 |  | 0             | #DIV/0! |
| SPEGNB | 0             | 0             | 0.05555555556 |  | 0             | #DIV/0! |
| SPEM1  | 0             | 0             | 0.05555555556 |  | 0             | #DIV/0! |
| SPEM2  | 0             | 0             | 0.05555555556 |  | 0             | #DIV/0! |
| SPEM3  | 0             | 0             | 0.05555555556 |  | 0             | #DIV/0! |
| SPEN   | 0.04761904762 | 0.04761904762 | 0.11111111111 |  | 0.325         | #DIV/0! |
| SPESP1 | 0.04761904762 | 0.04761904762 | 0.05555555556 |  | 0.7           | #DIV/0! |
| SPG21  | 0.04761904762 | 0.04761904762 | 0.05555555556 |  | 0.7           | #DIV/0! |
| SPG7   | 0.09523809524 | 0.09523809524 | 0             |  | inf           | #DIV/0! |
| SPHAR  | 0.1428571429  | 0.1428571429  | 0             |  | inf           | #DIV/0! |
| SPHK1  | 0.04761904762 | 0.04761904762 | 0             |  | inf           | #DIV/0! |
| SPHK2  | 0.09523809524 | 0.09523809524 | 0.11111111111 |  | 0.6842105263  | #DIV/0! |
| SPHKAF | 0             | 0             | 0.05555555556 |  | 0             | #DIV/0! |
| SPI1   | 0             | 0             | 0.05555555556 |  | 0             | #DIV/0! |
| SPIB   | 0.09523809524 | 0.09523809524 | 0.11111111111 |  | 0.6842105263  | #DIV/0! |
| SPIC   | 0.04761904762 | 0.04761904762 | 0.05555555556 |  | 0.7           | #DIV/0! |
| SPICE1 | 0.09523809524 | 0.09523809524 | 0.05555555556 |  | 1.473684211   | #DIV/0! |
| SPIDR  | 0.09523809524 | 0.09523809524 | 0.16666666667 |  | 0.4210526316  | #DIV/0! |
| SPIN1  | 0             | 0             | 0.05555555556 |  | 0             | #DIV/0! |
| SPINK2 | 0.1904761905  | 0.1904761905  | 0.05555555556 |  | 3.294117647   | #DIV/0! |
| SPINK4 | 0.09523809524 | 0.09523809524 | 0.05555555556 |  | 1.473684211   | #DIV/0! |
| SPINK8 | 0.09523809524 | 0.09523809524 | 0             |  | inf           | #DIV/0! |
| SPINT2 | 0.04761904762 | 0.04761904762 | 0.05555555556 |  | 0.7           | #DIV/0! |
| SPINT3 | 0.1428571429  | 0.1428571429  | 0.16666666667 |  | 0.66666666667 | #DIV/0! |
| SPINT4 | 0.1428571429  | 0.1428571429  | 0.16666666667 |  | 0.66666666667 | #DIV/0! |
| SPIRE1 | 0.09523809524 | 0.09523809524 | 0.05555555556 |  | 1.473684211   | #DIV/0! |
| SPIRE2 | 0.09523809524 | 0.09523809524 | 0             |  | inf           | #DIV/0! |
| SPN    | 0.04761904762 | 0.04761904762 | 0             |  | inf           | #DIV/0! |
| SPNS1  | 0.04761904762 | 0.04761904762 | 0             |  | inf           | #DIV/0! |
| SPNS2  | 0             | 0             | 0.11111111111 |  | 0             | #DIV/0! |
| SPNS3  | 0             | 0             | 0.11111111111 |  | 0             | #DIV/0! |
| SPO11  | 0.1428571429  | 0.1428571429  | 0.22222222222 |  | 0.4583333333  | #DIV/0! |
| SPOCD1 | 0.04761904762 | 0.04761904762 | 0.11111111111 |  | 0.325         | #DIV/0! |
| SPOCK1 | 0             | 0             | 0             |  |               | #DIV/0! |
| SPOCK2 | 0.1428571429  | 0.1428571429  | 0             |  | inf           | #DIV/0! |
| SPOCK3 | 0             | 0             | 0.05555555556 |  | 0             | #DIV/0! |
| SPON2  | 0.04761904762 | 0.04761904762 | 0             |  | inf           | #DIV/0! |
| SPOP   | 0.09523809524 | 0.09523809524 | 0             |  | inf           | #DIV/0! |
| SPOPL  | 0             | 0             | 0.05555555556 |  | 0             | #DIV/0! |
| SPOUT1 | 0.09523809524 | 0.09523809524 | 0.05555555556 |  | 1.473684211   | #DIV/0! |

|         |               |               |               |  |              |         |
|---------|---------------|---------------|---------------|--|--------------|---------|
| SPP1    | 0             | 0             | 0.05555555556 |  | 0            | #DIV/0! |
| SPP2    | 0             | 0             | 0.05555555556 |  | 0            | #DIV/0! |
| SPPL2A  | 0.1428571429  | 0.1428571429  | 0.05555555556 |  | 2.333333333  | #DIV/0! |
| SPPL2B  | 0.09523809524 | 0.09523809524 | 0.1111111111  |  | 0.6842105263 | #DIV/0! |
| SPPL2C  | 0.1428571429  | 0.1428571429  | 0             |  | inf          | #DIV/0! |
| SPPL3   | 0.04761904762 | 0.04761904762 | 0.1111111111  |  | 0.325        | #DIV/0! |
| SPR     | 0             | 0             | 0.05555555556 |  | 0            | #DIV/0! |
| SPRED1  | 0             | 0             | 0             |  |              | #DIV/0! |
| SPRED2  | 0             | 0             | 0.05555555556 |  | 0            | #DIV/0! |
| SPRED3  | 0.04761904762 | 0.04761904762 | 0.05555555556 |  | 0.7          | #DIV/0! |
| SPRN    | 0.1904761905  | 0.1904761905  | 0             |  | inf          | #DIV/0! |
| SPRNP1  | 0.1904761905  | 0.1904761905  | 0             |  | inf          | #DIV/0! |
| SPRR1A  | 0.1904761905  | 0.1904761905  | 0             |  | inf          | #DIV/0! |
| SPRR1B  | 0.1904761905  | 0.1904761905  | 0             |  | inf          | #DIV/0! |
| SPRR2A  | 0.1904761905  | 0.1904761905  | 0             |  | inf          | #DIV/0! |
| SPRR2B  | 0.1904761905  | 0.1904761905  | 0             |  | inf          | #DIV/0! |
| SPRR2C  | 0.1904761905  | 0.1904761905  | 0             |  | inf          | #DIV/0! |
| SPRR2D  | 0.1904761905  | 0.1904761905  | 0             |  | inf          | #DIV/0! |
| SPRR2E  | 0.1904761905  | 0.1904761905  | 0             |  | inf          | #DIV/0! |
| SPRR2F  | 0.1904761905  | 0.1904761905  | 0             |  | inf          | #DIV/0! |
| SPRR2G  | 0.1904761905  | 0.1904761905  | 0             |  | inf          | #DIV/0! |
| SPRR3   | 0.1904761905  | 0.1904761905  | 0             |  | inf          | #DIV/0! |
| SPRR4   | 0.1904761905  | 0.1904761905  | 0             |  | inf          | #DIV/0! |
| SPRTN   | 0.1428571429  | 0.1428571429  | 0             |  | inf          | #DIV/0! |
| SPRY1   | 0             | 0             | 0.05555555556 |  | 0            | #DIV/0! |
| SPRY4   | 0.04761904762 | 0.04761904762 | 0             |  | inf          | #DIV/0! |
| PRY4-AS | 0.04761904762 | 0.04761904762 | 0             |  | inf          | #DIV/0! |
| PRY4-IT | 0.04761904762 | 0.04761904762 | 0             |  | inf          | #DIV/0! |
| SPRYD3  | 0.04761904762 | 0.04761904762 | 0.05555555556 |  | 0.7          | #DIV/0! |
| SPSB1   | 0             | 0             | 0.05555555556 |  | 0            | #DIV/0! |
| SPSB2   | 0.04761904762 | 0.04761904762 | 0.1111111111  |  | 0.325        | #DIV/0! |
| SPSB3   | 0.09523809524 | 0.09523809524 | 0.2222222222  |  | 0.2894736842 | #DIV/0! |
| SPSB4   | 0.1428571429  | 0.1428571429  | 0.05555555556 |  | 2.333333333  | #DIV/0! |
| SPTA1   | 0.1428571429  | 0.1428571429  | 0.05555555556 |  | 2.333333333  | #DIV/0! |
| SPTAN1  | 0.09523809524 | 0.09523809524 | 0.05555555556 |  | 1.473684211  | #DIV/0! |
| SPTBN1  | 0.04761904762 | 0.04761904762 | 0.05555555556 |  | 0.7          | #DIV/0! |
| SPTBN4  | 0.04761904762 | 0.04761904762 | 0.05555555556 |  | 0.7          | #DIV/0! |
| SPTLC1  | 0.04761904762 | 0.04761904762 | 0.05555555556 |  | 0.7          | #DIV/0! |
| SPTLC3  | 0.1904761905  | 0.1904761905  | 0.1111111111  |  | 1.529411765  | #DIV/0! |
| SPTSSA  | 0.09523809524 | 0.09523809524 | 0             |  | inf          | #DIV/0! |
| SPTSSB  | 0.1428571429  | 0.1428571429  | 0.05555555556 |  | 2.333333333  | #DIV/0! |
| SPX     | 0.04761904762 | 0.04761904762 | 0.05555555556 |  | 0.7          | #DIV/0! |
| SPZI    | 0.04761904762 | 0.04761904762 | 0             |  | inf          | #DIV/0! |
| SQLE    | 0.1428571429  | 0.1428571429  | 0.1111111111  |  | 1.083333333  | #DIV/0! |
| SQOR    | 0.04761904762 | 0.04761904762 | 0             |  | inf          | #DIV/0! |
| SQSTM1  | 0.09523809524 | 0.09523809524 | 0.05555555556 |  | 1.473684211  | #DIV/0! |
| SRA1    | 0.04761904762 | 0.04761904762 | 0             |  | inf          | #DIV/0! |
| SRARP   | 0.04761904762 | 0.04761904762 | 0.1111111111  |  | 0.325        | #DIV/0! |
| SRBD1   | 0             | 0             | 0.05555555556 |  | 0            | #DIV/0! |
| SRC     | 0.09523809524 | 0.09523809524 | 0.1666666667  |  | 0.4210526316 | #DIV/0! |
| SRCAP   | 0.04761904762 | 0.04761904762 | 0             |  | inf          | #DIV/0! |



|         |               |               |               |  |              |         |
|---------|---------------|---------------|---------------|--|--------------|---------|
| SRCIN1  | 0.04761904762 | 0.04761904762 | 0             |  | inf          | #DIV/0! |
| SRD5A1  | 0             | 0             | 0.05555555556 |  | 0            | #DIV/0! |
| SRD5A2  | 0.04761904762 | 0.04761904762 | 0             |  | inf          | #DIV/0! |
| SRD5A3  | 0.1904761905  | 0.1904761905  | 0.05555555556 |  | 3.294117647  | #DIV/0! |
| D5A3-A  | 0.1904761905  | 0.1904761905  | 0.05555555556 |  | 3.294117647  | #DIV/0! |
| SREBF1  | 0.04761904762 | 0.04761904762 | 0.1111111111  |  | 0.325        | #DIV/0! |
| SREBF2  | 0             | 0             | 0.1111111111  |  | 0            | #DIV/0! |
| EBF2-A  | 0             | 0             | 0.1111111111  |  | 0            | #DIV/0! |
| SREK1   | 0.04761904762 | 0.04761904762 | 0             |  | inf          | #DIV/0! |
| REK1IP  | 0.04761904762 | 0.04761904762 | 0             |  | inf          | #DIV/0! |
| SRF     | 0.04761904762 | 0.04761904762 | 0.05555555556 |  | 0.7          | #DIV/0! |
| SRFBP1  | 0.04761904762 | 0.04761904762 | 0             |  | inf          | #DIV/0! |
| SRGAP1  | 0.1428571429  | 0.1428571429  | 0.05555555556 |  | 2.333333333  | #DIV/0! |
| SRGAP2  | 0.1428571429  | 0.1428571429  | 0             |  | inf          | #DIV/0! |
| GAP2-A  | 0.04761904762 | 0.04761904762 | 0.1111111111  |  | 0.325        | #DIV/0! |
| RGAP2I  | 0.04761904762 | 0.04761904762 | 0.1111111111  |  | 0.325        | #DIV/0! |
| RGAP2O  | 0.04761904762 | 0.04761904762 | 0.1111111111  |  | 0.325        | #DIV/0! |
| RGAP2I  | 0.1428571429  | 0.1428571429  | 0.1111111111  |  | 1.083333333  | #DIV/0! |
| SRGAP3  | 0.04761904762 | 0.04761904762 | 0             |  | inf          | #DIV/0! |
| GAP3-A  | 0.04761904762 | 0.04761904762 | 0             |  | inf          | #DIV/0! |
| GAP3-A  | 0.04761904762 | 0.04761904762 | 0             |  | inf          | #DIV/0! |
| GAP3-A  | 0.04761904762 | 0.04761904762 | 0             |  | inf          | #DIV/0! |
| SRGN    | 0.1904761905  | 0.1904761905  | 0.05555555556 |  | 3.294117647  | #DIV/0! |
| SRI     | 0.09523809524 | 0.09523809524 | 0.1111111111  |  | 0.6842105263 | #DIV/0! |
| SRL     | 0.04761904762 | 0.04761904762 | 0.1111111111  |  | 0.325        | #DIV/0! |
| SRM     | 0.04761904762 | 0.04761904762 | 0.1111111111  |  | 0.325        | #DIV/0! |
| SRMS    | 0.1428571429  | 0.1428571429  | 0.2222222222  |  | 0.4583333333 | #DIV/0! |
| SRP14   | 0             | 0             | 0             |  |              | #DIV/0! |
| RP14-AS | 0             | 0             | 0             |  |              | #DIV/0! |
| SRP19   | 0.04761904762 | 0.04761904762 | 0             |  | inf          | #DIV/0! |
| SRP54   | 0.09523809524 | 0.09523809524 | 0             |  | inf          | #DIV/0! |
| RP54-AS | 0.09523809524 | 0.09523809524 | 0             |  | inf          | #DIV/0! |
| SRP68   | 0.04761904762 | 0.04761904762 | 0             |  | inf          | #DIV/0! |
| SRP72   | 0.1904761905  | 0.1904761905  | 0.05555555556 |  | 3.294117647  | #DIV/0! |
| SRP9    | 0.1428571429  | 0.1428571429  | 0.05555555556 |  | 2.333333333  | #DIV/0! |
| SRPK1   | 0.04761904762 | 0.04761904762 | 0.05555555556 |  | 0.7          | #DIV/0! |
| SRPK2   | 0.04761904762 | 0.04761904762 | 0.05555555556 |  | 0.7          | #DIV/0! |
| SRPRB   | 0.1428571429  | 0.1428571429  | 0.05555555556 |  | 2.333333333  | #DIV/0! |
| SRR     | 0             | 0             | 0.1111111111  |  | 0            | #DIV/0! |
| SRRD    | 0.04761904762 | 0.04761904762 | 0.05555555556 |  | 0.7          | #DIV/0! |
| SRRM1   | 0.04761904762 | 0.04761904762 | 0.1111111111  |  | 0.325        | #DIV/0! |
| SRRM2   | 0.04761904762 | 0.04761904762 | 0.1111111111  |  | 0.325        | #DIV/0! |
| RM2-A   | 0.04761904762 | 0.04761904762 | 0.1111111111  |  | 0.325        | #DIV/0! |
| SRRM3   | 0.1428571429  | 0.1428571429  | 0.1111111111  |  | 1.083333333  | #DIV/0! |
| SRRM4   | 0             | 0             | 0.05555555556 |  | 0            | #DIV/0! |
| SRRM5   | 0.09523809524 | 0.09523809524 | 0.05555555556 |  | 1.473684211  | #DIV/0! |
| SRRT    | 0.04761904762 | 0.04761904762 | 0.05555555556 |  | 0.7          | #DIV/0! |
| SRSF1   | 0.09523809524 | 0.09523809524 | 0             |  | inf          | #DIV/0! |
| SRSF10  | 0.04761904762 | 0.04761904762 | 0.1111111111  |  | 0.325        | #DIV/0! |
| SRSF11  | 0.04761904762 | 0.04761904762 | 0.05555555556 |  | 0.7          | #DIV/0! |
| SRSF2   | 0.04761904762 | 0.04761904762 | 0             |  | inf          | #DIV/0! |

|           |               |               |               |  |              |         |
|-----------|---------------|---------------|---------------|--|--------------|---------|
| SRSF3     | 0.04761904762 | 0.04761904762 | 0.05555555556 |  | 0.7          | #DIV/0! |
| SRSF4     | 0.04761904762 | 0.04761904762 | 0.11111111111 |  | 0.325        | #DIV/0! |
| SRSF6     | 0.1428571429  | 0.1428571429  | 0.11111111111 |  | 1.083333333  | #DIV/0! |
| SRSF7     | 0             | 0             | 0.05555555556 |  | 0            | #DIV/0! |
| SRSF9     | 0             | 0             | 0.11111111111 |  | 0            | #DIV/0! |
| SRXN1     | 0.1904761905  | 0.1904761905  | 0.05555555556 |  | 3.294117647  | #DIV/0! |
| SS18      | 0.09523809524 | 0.09523809524 | 0.05555555556 |  | 1.473684211  | #DIV/0! |
| SS18L1    | 0.1428571429  | 0.1428571429  | 0.22222222222 |  | 0.4583333333 | #DIV/0! |
| SS18L2    | 0.04761904762 | 0.04761904762 | 0             |  | inf          | #DIV/0! |
| SSB       | 0             | 0             | 0.05555555556 |  | 0            | #DIV/0! |
| SSBP1     | 0.04761904762 | 0.04761904762 | 0.05555555556 |  | 0.7          | #DIV/0! |
| SSBP2     | 0.04761904762 | 0.04761904762 | 0             |  | inf          | #DIV/0! |
| SSBP3     | 0.04761904762 | 0.04761904762 | 0.05555555556 |  | 0.7          | #DIV/0! |
| SSBP3-AS  | 0.04761904762 | 0.04761904762 | 0.05555555556 |  | 0.7          | #DIV/0! |
| SSBP4     | 0.1428571429  | 0.1428571429  | 0.11111111111 |  | 1.083333333  | #DIV/0! |
| SSC4D     | 0.09523809524 | 0.09523809524 | 0.11111111111 |  | 0.6842105263 | #DIV/0! |
| SSC5D     | 0.09523809524 | 0.09523809524 | 0.05555555556 |  | 1.473684211  | #DIV/0! |
| SSH1      | 0             | 0             | 0.05555555556 |  | 0            | #DIV/0! |
| SSH2      | 0             | 0             | 0.05555555556 |  | 0            | #DIV/0! |
| SMEM1     | 0.04761904762 | 0.04761904762 | 0.05555555556 |  | 0.7          | #DIV/0! |
| SSNA1     | 0.1428571429  | 0.1428571429  | 0.05555555556 |  | 2.333333333  | #DIV/0! |
| SSPN      | 0.04761904762 | 0.04761904762 | 0.05555555556 |  | 0.7          | #DIV/0! |
| SSPO      | 0.09523809524 | 0.09523809524 | 0.05555555556 |  | 1.473684211  | #DIV/0! |
| SSR2      | 0.1428571429  | 0.1428571429  | 0.11111111111 |  | 1.083333333  | #DIV/0! |
| SSR3      | 0.1428571429  | 0.1428571429  | 0.05555555556 |  | 2.333333333  | #DIV/0! |
| SSR4P1    | 0.04761904762 | 0.04761904762 | 0.11111111111 |  | 0.325        | #DIV/0! |
| SST       | 0.09523809524 | 0.09523809524 | 0.11111111111 |  | 0.6842105263 | #DIV/0! |
| SSTR2     | 0.04761904762 | 0.04761904762 | 0             |  | inf          | #DIV/0! |
| SSTR3     | 0             | 0             | 0.11111111111 |  | 0            | #DIV/0! |
| SSTR4     | 0.1904761905  | 0.1904761905  | 0.05555555556 |  | 3.294117647  | #DIV/0! |
| SSTR5     | 0.04761904762 | 0.04761904762 | 0.22222222222 |  | 0.1375       | #DIV/0! |
| SSTR5-AS  | 0.04761904762 | 0.04761904762 | 0.22222222222 |  | 0.1375       | #DIV/0! |
| SSU72     | 0             | 0             | 0.11111111111 |  | 0            | #DIV/0! |
| SSUH2     | 0.04761904762 | 0.04761904762 | 0             |  | inf          | #DIV/0! |
| SSX2IP    | 0.04761904762 | 0.04761904762 | 0.05555555556 |  | 0.7          | #DIV/0! |
| ST13      | 0             | 0             | 0.11111111111 |  | 0            | #DIV/0! |
| ST18      | 0.09523809524 | 0.09523809524 | 0.11111111111 |  | 0.6842105263 | #DIV/0! |
| ST20      | 0.04761904762 | 0.04761904762 | 0.05555555556 |  | 0.7          | #DIV/0! |
| ST20-AS   | 0.04761904762 | 0.04761904762 | 0.05555555556 |  | 0.7          | #DIV/0! |
| ST20-MTH  | 0.04761904762 | 0.04761904762 | 0.05555555556 |  | 0.7          | #DIV/0! |
| ST3GAL    | 0.04761904762 | 0.04761904762 | 0.22222222222 |  | 0.1375       | #DIV/0! |
| ST3GAL    | 0.1428571429  | 0.1428571429  | 0.05555555556 |  | 2.333333333  | #DIV/0! |
| ST3GAL    | 0.04761904762 | 0.04761904762 | 0.05555555556 |  | 0.7          | #DIV/0! |
| ST3GAL    | 0             | 0             | 0.05555555556 |  | 0            | #DIV/0! |
| ST3GAL5-A | 0             | 0             | 0.05555555556 |  | 0            | #DIV/0! |
| ST3GAL    | 0.04761904762 | 0.04761904762 | 0.05555555556 |  | 0.7          | #DIV/0! |
| ST3GAL6-A | 0.04761904762 | 0.04761904762 | 0.05555555556 |  | 0.7          | #DIV/0! |
| ST6GAL    | 0.09523809524 | 0.09523809524 | 0.05555555556 |  | 1.473684211  | #DIV/0! |
| ST6GAL    | 0             | 0             | 0.05555555556 |  | 0            | #DIV/0! |
| ST6GALNA  | 0.04761904762 | 0.04761904762 | 0             |  | inf          | #DIV/0! |
| ST6GALNA  | 0.04761904762 | 0.04761904762 | 0             |  | inf          | #DIV/0! |

|         |               |               |               |  |              |         |
|---------|---------------|---------------|---------------|--|--------------|---------|
| GALNA0  | 0.04761904762 | 0.04761904762 | 0.05555555556 |  | 0.7          | #DIV/0! |
| GALNA0  | 0.09523809524 | 0.09523809524 | 0.05555555556 |  | 1.473684211  | #DIV/0! |
| GALNA0  | 0.04761904762 | 0.04761904762 | 0.05555555556 |  | 0.7          | #DIV/0! |
| GALNA0  | 0.09523809524 | 0.09523809524 | 0.05555555556 |  | 1.473684211  | #DIV/0! |
| ST7     | 0.09523809524 | 0.09523809524 | 0.2222222222  |  | 0.2894736842 | #DIV/0! |
| ST7-AS1 | 0.09523809524 | 0.09523809524 | 0.2222222222  |  | 0.2894736842 | #DIV/0! |
| ST7-AS2 | 0.09523809524 | 0.09523809524 | 0.1666666667  |  | 0.4210526316 | #DIV/0! |
| ST7-OT3 | 0.09523809524 | 0.09523809524 | 0.1666666667  |  | 0.4210526316 | #DIV/0! |
| ST7-OT4 | 0.09523809524 | 0.09523809524 | 0.2222222222  |  | 0.2894736842 | #DIV/0! |
| ST7L    | 0.04761904762 | 0.04761904762 | 0.05555555556 |  | 0.7          | #DIV/0! |
| ST8SIA1 | 0.04761904762 | 0.04761904762 | 0.05555555556 |  | 0.7          | #DIV/0! |
| ST8SIA2 | 0.04761904762 | 0.04761904762 | 0.05555555556 |  | 0.7          | #DIV/0! |
| ST8SIA3 | 0.09523809524 | 0.09523809524 | 0             |  | inf          | #DIV/0! |
| ST8SIA4 | 0.04761904762 | 0.04761904762 | 0             |  | inf          | #DIV/0! |
| ST8SIA5 | 0.04761904762 | 0.04761904762 | 0.05555555556 |  | 0.7          | #DIV/0! |
| ST8SIA6 | 0.09523809524 | 0.09523809524 | 0.1111111111  |  | 0.6842105263 | #DIV/0! |
| 8SIA6-A | 0.09523809524 | 0.09523809524 | 0.1111111111  |  | 0.6842105263 | #DIV/0! |
| STAB1   | 0.04761904762 | 0.04761904762 | 0             |  | inf          | #DIV/0! |
| STAB2   | 0.04761904762 | 0.04761904762 | 0.05555555556 |  | 0.7          | #DIV/0! |
| STAC    | 0.04761904762 | 0.04761904762 | 0             |  | inf          | #DIV/0! |
| STAC2   | 0.09523809524 | 0.09523809524 | 0             |  | inf          | #DIV/0! |
| STAC3   | 0.1428571429  | 0.1428571429  | 0.05555555556 |  | 2.333333333  | #DIV/0! |
| STAG1   | 0.1904761905  | 0.1904761905  | 0.05555555556 |  | 3.294117647  | #DIV/0! |
| STAG3   | 0.04761904762 | 0.04761904762 | 0.05555555556 |  | 0.7          | #DIV/0! |
| TAG3L   | 0.1428571429  | 0.1428571429  | 0.1666666667  |  | 0.6666666667 | #DIV/0! |
| TAG3L   | 0.1428571429  | 0.1428571429  | 0.1666666667  |  | 0.6666666667 | #DIV/0! |
| TAG3L   | 0.1428571429  | 0.1428571429  | 0.1111111111  |  | 1.083333333  | #DIV/0! |
| TAG3L   | 0.04761904762 | 0.04761904762 | 0.1111111111  |  | 0.325        | #DIV/0! |
| TAG3L5  | 0.04761904762 | 0.04761904762 | 0.05555555556 |  | 0.7          | #DIV/0! |
| -PVRIG  | 0.04761904762 | 0.04761904762 | 0.05555555556 |  | 0.7          | #DIV/0! |
| STAM    | 0.09523809524 | 0.09523809524 | 0.1111111111  |  | 0.6842105263 | #DIV/0! |
| TAM-AS  | 0.09523809524 | 0.09523809524 | 0.1111111111  |  | 0.6842105263 | #DIV/0! |
| STAM2   | 0             | 0             | 0.05555555556 |  | 0            | #DIV/0! |
| STAMBI  | 0             | 0             | 0.05555555556 |  | 0            | #DIV/0! |
| TAMBPI  | 0.1428571429  | 0.1428571429  | 0.1666666667  |  | 0.6666666667 | #DIV/0! |
| STAP1   | 0.04761904762 | 0.04761904762 | 0.05555555556 |  | 0.7          | #DIV/0! |
| STAP2   | 0.09523809524 | 0.09523809524 | 0.05555555556 |  | 1.473684211  | #DIV/0! |
| STAR    | 0.09523809524 | 0.09523809524 | 0.1111111111  |  | 0.6842105263 | #DIV/0! |
| STARD3  | 0.09523809524 | 0.09523809524 | 0             |  | inf          | #DIV/0! |
| TARD3N  | 0.04761904762 | 0.04761904762 | 0.2222222222  |  | 0.1375       | #DIV/0! |
| STARD4  | 0.04761904762 | 0.04761904762 | 0             |  | inf          | #DIV/0! |
| ARD4-A  | 0.04761904762 | 0.04761904762 | 0             |  | inf          | #DIV/0! |
| STARD5  | 0.04761904762 | 0.04761904762 | 0.05555555556 |  | 0.7          | #DIV/0! |
| STARD6  | 0.09523809524 | 0.09523809524 | 0             |  | inf          | #DIV/0! |
| STARD7  | 0             | 0             | 0.1111111111  |  | 0            | #DIV/0! |
| ARD7-A  | 0             | 0             | 0.1111111111  |  | 0            | #DIV/0! |
| STAT2   | 0.1428571429  | 0.1428571429  | 0.05555555556 |  | 2.333333333  | #DIV/0! |
| STAT3   | 0.04761904762 | 0.04761904762 | 0             |  | inf          | #DIV/0! |
| STAT4   | 0             | 0             | 0.05555555556 |  | 0            | #DIV/0! |
| STAT5A  | 0.04761904762 | 0.04761904762 | 0             |  | inf          | #DIV/0! |
| STAT5B  | 0.04761904762 | 0.04761904762 | 0             |  | inf          | #DIV/0! |

|         |               |               |               |  |              |         |
|---------|---------------|---------------|---------------|--|--------------|---------|
| STAT6   | 0.1428571429  | 0.1428571429  | 0.05555555556 |  | 2.333333333  | #DIV/0! |
| STATH   | 0.04761904762 | 0.04761904762 | 0.05555555556 |  | 0.7          | #DIV/0! |
| STAU1   | 0.09523809524 | 0.09523809524 | 0.16666666667 |  | 0.4210526316 | #DIV/0! |
| STAU2   | 0.1904761905  | 0.1904761905  | 0.16666666667 |  | 0.9411764706 | #DIV/0! |
| TAU2-AS | 0.1904761905  | 0.1904761905  | 0.16666666667 |  | 0.9411764706 | #DIV/0! |
| STBD1   | 0.04761904762 | 0.04761904762 | 0.05555555556 |  | 0.7          | #DIV/0! |
| STC1    | 0.04761904762 | 0.04761904762 | 0.11111111111 |  | 0.325        | #DIV/0! |
| STC2    | 0             | 0             | 0.05555555556 |  | 0            | #DIV/0! |
| STEAP1  | 0.09523809524 | 0.09523809524 | 0.11111111111 |  | 0.6842105263 | #DIV/0! |
| TEAP1   | 0.04761904762 | 0.04761904762 | 0.16666666667 |  | 0.2          | #DIV/0! |
| STEAP2  | 0.09523809524 | 0.09523809524 | 0.11111111111 |  | 0.6842105263 | #DIV/0! |
| EAP2-A  | 0.09523809524 | 0.09523809524 | 0.11111111111 |  | 0.6842105263 | #DIV/0! |
| STEAP3  | 0             | 0             | 0.05555555556 |  | 0            | #DIV/0! |
| EAP3-A  | 0             | 0             | 0.05555555556 |  | 0            | #DIV/0! |
| STEAP4  | 0.09523809524 | 0.09523809524 | 0.11111111111 |  | 0.6842105263 | #DIV/0! |
| STH     | 0.1428571429  | 0.1428571429  | 0             |  | inf          | #DIV/0! |
| STIL    | 0.04761904762 | 0.04761904762 | 0.05555555556 |  | 0.7          | #DIV/0! |
| STIM1   | 0.04761904762 | 0.04761904762 | 0             |  | inf          | #DIV/0! |
| TIMAT   | 0.04761904762 | 0.04761904762 | 0             |  | inf          | #DIV/0! |
| ATE-MU  | 0.04761904762 | 0.04761904762 | 0             |  | inf          | #DIV/0! |
| STK10   | 0             | 0             | 0.05555555556 |  | 0            | #DIV/0! |
| STK11   | 0.09523809524 | 0.09523809524 | 0.11111111111 |  | 0.6842105263 | #DIV/0! |
| STK11H  | 0             | 0             | 0.05555555556 |  | 0            | #DIV/0! |
| STK17A  | 0.04761904762 | 0.04761904762 | 0.16666666667 |  | 0.2          | #DIV/0! |
| STK17B  | 0             | 0             | 0.05555555556 |  | 0            | #DIV/0! |
| STK19   | 0.04761904762 | 0.04761904762 | 0             |  | inf          | #DIV/0! |
| STK25   | 0             | 0             | 0.05555555556 |  | 0            | #DIV/0! |
| STK3    | 0.1904761905  | 0.1904761905  | 0.11111111111 |  | 1.529411765  | #DIV/0! |
| STK31   | 0.04761904762 | 0.04761904762 | 0.16666666667 |  | 0.2          | #DIV/0! |
| STK32C  | 0.2380952381  | 0.2380952381  | 0             |  | inf          | #DIV/0! |
| STK35   | 0.1904761905  | 0.1904761905  | 0.11111111111 |  | 1.529411765  | #DIV/0! |
| STK36   | 0             | 0             | 0.05555555556 |  | 0            | #DIV/0! |
| STK38   | 0.04761904762 | 0.04761904762 | 0.05555555556 |  | 0.7          | #DIV/0! |
| STK38L  | 0.04761904762 | 0.04761904762 | 0.05555555556 |  | 0.7          | #DIV/0! |
| STK39   | 0.04761904762 | 0.04761904762 | 0.05555555556 |  | 0.7          | #DIV/0! |
| STK4    | 0.1428571429  | 0.1428571429  | 0.16666666667 |  | 0.6666666667 | #DIV/0! |
| TK4-AS  | 0.1428571429  | 0.1428571429  | 0.16666666667 |  | 0.6666666667 | #DIV/0! |
| STK40   | 0.04761904762 | 0.04761904762 | 0.05555555556 |  | 0.7          | #DIV/0! |
| STKLD1  | 0.04761904762 | 0.04761904762 | 0             |  | inf          | #DIV/0! |
| STMN1   | 0.04761904762 | 0.04761904762 | 0.11111111111 |  | 0.325        | #DIV/0! |
| STMN2   | 0.1428571429  | 0.1428571429  | 0.11111111111 |  | 1.083333333  | #DIV/0! |
| STMN3   | 0.1428571429  | 0.1428571429  | 0.22222222222 |  | 0.4583333333 | #DIV/0! |
| STMN4   | 0.04761904762 | 0.04761904762 | 0.11111111111 |  | 0.325        | #DIV/0! |
| STMP1   | 0.04761904762 | 0.04761904762 | 0.05555555556 |  | 0.7          | #DIV/0! |
| STN1    | 0.1428571429  | 0.1428571429  | 0.11111111111 |  | 1.083333333  | #DIV/0! |
| STOM    | 0.09523809524 | 0.09523809524 | 0.05555555556 |  | 1.473684211  | #DIV/0! |
| STOML   | 0.04761904762 | 0.04761904762 | 0.05555555556 |  | 0.7          | #DIV/0! |
| STOML2  | 0.09523809524 | 0.09523809524 | 0.05555555556 |  | 1.473684211  | #DIV/0! |
| STON1   | 0             | 0             | 0.05555555556 |  | 0            | #DIV/0! |
| N1-GTF  | 0             | 0             | 0.05555555556 |  | 0            | #DIV/0! |
| STOX1   | 0.1904761905  | 0.1904761905  | 0.05555555556 |  | 3.294117647  | #DIV/0! |

|         |               |               |               |  |              |         |
|---------|---------------|---------------|---------------|--|--------------|---------|
| STOX2   | 0             | 0             | 0.05555555556 |  | 0            | #DIV/0! |
| STPG1   | 0.04761904762 | 0.04761904762 | 0.1111111111  |  | 0.325        | #DIV/0! |
| STPG2   | 0             | 0             | 0.05555555556 |  | 0            | #DIV/0! |
| TPG2-AS | 0             | 0             | 0.05555555556 |  | 0            | #DIV/0! |
| STPG3   | 0.1428571429  | 0.1428571429  | 0.05555555556 |  | 2.333333333  | #DIV/0! |
| TPG3-AS | 0.1428571429  | 0.1428571429  | 0.05555555556 |  | 2.333333333  | #DIV/0! |
| STPG4   | 0             | 0             | 0.05555555556 |  | 0            | #DIV/0! |
| STRA6   | 0.04761904762 | 0.04761904762 | 0.05555555556 |  | 0.7          | #DIV/0! |
| STRA8   | 0.04761904762 | 0.04761904762 | 0.05555555556 |  | 0.7          | #DIV/0! |
| STRADA  | 0.04761904762 | 0.04761904762 | 0             |  | inf          | #DIV/0! |
| STRADB  | 0             | 0             | 0.05555555556 |  | 0            | #DIV/0! |
| STRAP   | 0.04761904762 | 0.04761904762 | 0.1111111111  |  | 0.325        | #DIV/0! |
| STRBP   | 0.09523809524 | 0.09523809524 | 0.05555555556 |  | 1.473684211  | #DIV/0! |
| STRIP1  | 0.04761904762 | 0.04761904762 | 0.05555555556 |  | 0.7          | #DIV/0! |
| STRIP2  | 0.04761904762 | 0.04761904762 | 0.05555555556 |  | 0.7          | #DIV/0! |
| STRIT1  | 0.1904761905  | 0.1904761905  | 0.05555555556 |  | 3.294117647  | #DIV/0! |
| STRN    | 0             | 0             | 0.05555555556 |  | 0            | #DIV/0! |
| STRN3   | 0             | 0             | 0             |  |              | #DIV/0! |
| STRN4   | 0.09523809524 | 0.09523809524 | 0.1111111111  |  | 0.6842105263 | #DIV/0! |
| STT3B   | 0.04761904762 | 0.04761904762 | 0             |  | inf          | #DIV/0! |
| STUB1   | 0.04761904762 | 0.04761904762 | 0.2222222222  |  | 0.1375       | #DIV/0! |
| STUM    | 0.1428571429  | 0.1428571429  | 0             |  | inf          | #DIV/0! |
| STX10   | 0.1428571429  | 0.1428571429  | 0.1111111111  |  | 1.083333333  | #DIV/0! |
| STX12   | 0.04761904762 | 0.04761904762 | 0.1111111111  |  | 0.325        | #DIV/0! |
| STX16   | 0.1428571429  | 0.1428571429  | 0.2222222222  |  | 0.4583333333 | #DIV/0! |
| 16-NPE  | 0.1428571429  | 0.1428571429  | 0.2222222222  |  | 0.4583333333 | #DIV/0! |
| STX17   | 0.04761904762 | 0.04761904762 | 0             |  | inf          | #DIV/0! |
| TX17-AS | 0.04761904762 | 0.04761904762 | 0             |  | inf          | #DIV/0! |
| STX19   | 0.04761904762 | 0.04761904762 | 0.05555555556 |  | 0.7          | #DIV/0! |
| STX1A   | 0.1428571429  | 0.1428571429  | 0.1111111111  |  | 1.083333333  | #DIV/0! |
| STX1B   | 0.04761904762 | 0.04761904762 | 0             |  | inf          | #DIV/0! |
| STX2    | 0.09523809524 | 0.09523809524 | 0.05555555556 |  | 1.473684211  | #DIV/0! |
| STX4    | 0.04761904762 | 0.04761904762 | 0             |  | inf          | #DIV/0! |
| STX6    | 0.1428571429  | 0.1428571429  | 0             |  | inf          | #DIV/0! |
| STX8    | 0.04761904762 | 0.04761904762 | 0.05555555556 |  | 0.7          | #DIV/0! |
| STXBP1  | 0.09523809524 | 0.09523809524 | 0.05555555556 |  | 1.473684211  | #DIV/0! |
| STXBP2  | 0.1428571429  | 0.1428571429  | 0.05555555556 |  | 2.333333333  | #DIV/0! |
| STXBP3  | 0.04761904762 | 0.04761904762 | 0.05555555556 |  | 0.7          | #DIV/0! |
| STXBP4  | 0.09523809524 | 0.09523809524 | 0             |  | inf          | #DIV/0! |
| TXBP5   | 0.1428571429  | 0.1428571429  | 0.05555555556 |  | 2.333333333  | #DIV/0! |
| STYK1   | 0.04761904762 | 0.04761904762 | 0.1111111111  |  | 0.325        | #DIV/0! |
| STYX    | 0.04761904762 | 0.04761904762 | 0             |  | inf          | #DIV/0! |
| STYXL1  | 0.1428571429  | 0.1428571429  | 0.1111111111  |  | 1.083333333  | #DIV/0! |
| SUB1    | 0.04761904762 | 0.04761904762 | 0.05555555556 |  | 0.7          | #DIV/0! |
| SUCLG1  | 0             | 0             | 0.05555555556 |  | 0            | #DIV/0! |
| SUCLG2  | 0.04761904762 | 0.04761904762 | 0             |  | inf          | #DIV/0! |
| CLG2-A  | 0.04761904762 | 0.04761904762 | 0             |  | inf          | #DIV/0! |
| SUCNR1  | 0.1904761905  | 0.1904761905  | 0.1111111111  |  | 1.529411765  | #DIV/0! |
| SUCO    | 0.1428571429  | 0.1428571429  | 0             |  | inf          | #DIV/0! |
| SUDS3   | 0             | 0             | 0.05555555556 |  | 0            | #DIV/0! |
| SUFU    | 0.1428571429  | 0.1428571429  | 0.05555555556 |  | 2.333333333  | #DIV/0! |

|         |               |               |               |  |              |         |
|---------|---------------|---------------|---------------|--|--------------|---------|
| SUGCT   | 0.04761904762 | 0.04761904762 | 0.2222222222  |  | 0.1375       | #DIV/0! |
| SUGP1   | 0.1428571429  | 0.1428571429  | 0.1111111111  |  | 1.083333333  | #DIV/0! |
| SUGP2   | 0.1428571429  | 0.1428571429  | 0.1111111111  |  | 1.083333333  | #DIV/0! |
| UGT1P   | 0.09523809524 | 0.09523809524 | 0.05555555556 |  | 1.473684211  | #DIV/0! |
| IP4-STF | 0.04761904762 | 0.04761904762 | 0             |  | inf          | #DIV/0! |
| TRA6L   | 0.04761904762 | 0.04761904762 | 0             |  | inf          | #DIV/0! |
| SULF1   | 0.1428571429  | 0.1428571429  | 0.1666666667  |  | 0.6666666667 | #DIV/0! |
| SULF2   | 0.1428571429  | 0.1428571429  | 0.1666666667  |  | 0.6666666667 | #DIV/0! |
| SULT1A  | 0.04761904762 | 0.04761904762 | 0             |  | inf          | #DIV/0! |
| SULT1A  | 0.04761904762 | 0.04761904762 | 0             |  | inf          | #DIV/0! |
| SULT1A  | 0.04761904762 | 0.04761904762 | 0             |  | inf          | #DIV/0! |
| SULT1A  | 0.04761904762 | 0.04761904762 | 0             |  | inf          | #DIV/0! |
| SULT1B  | 0.04761904762 | 0.04761904762 | 0.05555555556 |  | 0.7          | #DIV/0! |
| SULT1C  | 0             | 0             | 0.05555555556 |  | 0            | #DIV/0! |
| SULT1C2 | 0             | 0             | 0.05555555556 |  | 0            | #DIV/0! |
| SULT1C  | 0             | 0             | 0.05555555556 |  | 0            | #DIV/0! |
| SULT1C  | 0             | 0             | 0.05555555556 |  | 0            | #DIV/0! |
| SULT1E  | 0.04761904762 | 0.04761904762 | 0.05555555556 |  | 0.7          | #DIV/0! |
| SULT2A  | 0.09523809524 | 0.09523809524 | 0.1111111111  |  | 0.6842105263 | #DIV/0! |
| SULT2B  | 0.09523809524 | 0.09523809524 | 0.1111111111  |  | 0.6842105263 | #DIV/0! |
| SULT4A  | 0             | 0             | 0.1666666667  |  | 0            | #DIV/0! |
| SULT6B  | 0             | 0             | 0.05555555556 |  | 0            | #DIV/0! |
| SUMF1   | 0.04761904762 | 0.04761904762 | 0             |  | inf          | #DIV/0! |
| SUMF2   | 0.2380952381  | 0.2380952381  | 0.2222222222  |  | 0.859375     | #DIV/0! |
| SUMO1   | 0.09523809524 | 0.09523809524 | 0.05555555556 |  | 1.473684211  | #DIV/0! |
| UMO1P   | 0.09523809524 | 0.09523809524 | 0.1111111111  |  | 0.6842105263 | #DIV/0! |
| UMO1P   | 0.1428571429  | 0.1428571429  | 0             |  | inf          | #DIV/0! |
| SUMO2   | 0.04761904762 | 0.04761904762 | 0.05555555556 |  | 0.7          | #DIV/0! |
| SUMO3   | 0.04761904762 | 0.04761904762 | 0.1111111111  |  | 0.325        | #DIV/0! |
| SUN1    | 0.04761904762 | 0.04761904762 | 0.1666666667  |  | 0.2          | #DIV/0! |
| SUN2    | 0.04761904762 | 0.04761904762 | 0.1111111111  |  | 0.325        | #DIV/0! |
| SUN3    | 0.04761904762 | 0.04761904762 | 0.2222222222  |  | 0.1375       | #DIV/0! |
| SUN5    | 0.09523809524 | 0.09523809524 | 0.1111111111  |  | 0.6842105263 | #DIV/0! |
| SUOX    | 0.09523809524 | 0.09523809524 | 0.05555555556 |  | 1.473684211  | #DIV/0! |
| SUPT3H  | 0.04761904762 | 0.04761904762 | 0.1111111111  |  | 0.325        | #DIV/0! |
| SUPT4H  | 0.09523809524 | 0.09523809524 | 0             |  | inf          | #DIV/0! |
| SUPT5H  | 0.04761904762 | 0.04761904762 | 0.05555555556 |  | 0.7          | #DIV/0! |
| SUPT6H  | 0.04761904762 | 0.04761904762 | 0.05555555556 |  | 0.7          | #DIV/0! |
| SUPT7L  | 0             | 0             | 0.05555555556 |  | 0            | #DIV/0! |
| UPV3L   | 0.1904761905  | 0.1904761905  | 0.05555555556 |  | 3.294117647  | #DIV/0! |
| SURF1   | 0.04761904762 | 0.04761904762 | 0             |  | inf          | #DIV/0! |
| SURF2   | 0.04761904762 | 0.04761904762 | 0             |  | inf          | #DIV/0! |
| SURF4   | 0.04761904762 | 0.04761904762 | 0             |  | inf          | #DIV/0! |
| SURF6   | 0.04761904762 | 0.04761904762 | 0             |  | inf          | #DIV/0! |
| SUSD1   | 0.04761904762 | 0.04761904762 | 0.05555555556 |  | 0.7          | #DIV/0! |
| SUSD2   | 0.04761904762 | 0.04761904762 | 0.1111111111  |  | 0.325        | #DIV/0! |
| SUSD3   | 0.04761904762 | 0.04761904762 | 0.05555555556 |  | 0.7          | #DIV/0! |
| SUSD4   | 0.1428571429  | 0.1428571429  | 0.05555555556 |  | 2.333333333  | #DIV/0! |
| SUSD5   | 0.09523809524 | 0.09523809524 | 0             |  | inf          | #DIV/0! |
| UV39H   | 0.09523809524 | 0.09523809524 | 0.1111111111  |  | 0.6842105263 | #DIV/0! |
| SUZ12   | 0             | 0             | 0             |  |              | #DIV/0! |

|         |               |               |               |  |              |         |
|---------|---------------|---------------|---------------|--|--------------|---------|
| SUZ12P1 | 0             | 0             | 0.05555555556 |  | 0            | #DIV/0! |
| SV2A    | 0.1428571429  | 0.1428571429  | 0.05555555556 |  | 2.333333333  | #DIV/0! |
| SV2B    | 0.04761904762 | 0.04761904762 | 0.05555555556 |  | 0.7          | #DIV/0! |
| SV2C    | 0.04761904762 | 0.04761904762 | 0             |  | inf          | #DIV/0! |
| SVBP    | 0.04761904762 | 0.04761904762 | 0.05555555556 |  | 0.7          | #DIV/0! |
| SVEP1   | 0.04761904762 | 0.04761904762 | 0.05555555556 |  | 0.7          | #DIV/0! |
| SVIL    | 0.09523809524 | 0.09523809524 | 0.2222222222  |  | 0.2894736842 | #DIV/0! |
| VIL-AS  | 0.09523809524 | 0.09523809524 | 0.2222222222  |  | 0.2894736842 | #DIV/0! |
| SVIL2P  | 0.09523809524 | 0.09523809524 | 0.2222222222  |  | 0.2894736842 | #DIV/0! |
| SVOP    | 0             | 0             | 0.05555555556 |  | 0            | #DIV/0! |
| SVOPL   | 0.04761904762 | 0.04761904762 | 0.05555555556 |  | 0.7          | #DIV/0! |
| SWAP70  | 0.04761904762 | 0.04761904762 | 0.05555555556 |  | 0.7          | #DIV/0! |
| SWI5    | 0.09523809524 | 0.09523809524 | 0.05555555556 |  | 1.473684211  | #DIV/0! |
| SWT1    | 0.1428571429  | 0.1428571429  | 0.05555555556 |  | 2.333333333  | #DIV/0! |
| SYBU    | 0.1904761905  | 0.1904761905  | 0.1111111111  |  | 1.529411765  | #DIV/0! |
| SYCE1   | 0.1904761905  | 0.1904761905  | 0             |  | inf          | #DIV/0! |
| SYCE1L  | 0.04761904762 | 0.04761904762 | 0             |  | inf          | #DIV/0! |
| SYCE2   | 0.1428571429  | 0.1428571429  | 0.1111111111  |  | 1.083333333  | #DIV/0! |
| SYCE3   | 0             | 0             | 0.1111111111  |  | 0            | #DIV/0! |
| SYCN    | 0.04761904762 | 0.04761904762 | 0.05555555556 |  | 0.7          | #DIV/0! |
| SYCP1   | 0.04761904762 | 0.04761904762 | 0.05555555556 |  | 0.7          | #DIV/0! |
| SYCP2   | 0.1428571429  | 0.1428571429  | 0.1666666667  |  | 0.6666666667 | #DIV/0! |
| SYCP2L  | 0.04761904762 | 0.04761904762 | 0             |  | inf          | #DIV/0! |
| SYCP3   | 0.04761904762 | 0.04761904762 | 0.05555555556 |  | 0.7          | #DIV/0! |
| SYDE1   | 0.1428571429  | 0.1428571429  | 0.1111111111  |  | 1.083333333  | #DIV/0! |
| SYDE2   | 0.04761904762 | 0.04761904762 | 0.05555555556 |  | 0.7          | #DIV/0! |
| SYF2    | 0.04761904762 | 0.04761904762 | 0.1111111111  |  | 0.325        | #DIV/0! |
| SYK     | 0.04761904762 | 0.04761904762 | 0.05555555556 |  | 0.7          | #DIV/0! |
| SYMPK   | 0.09523809524 | 0.09523809524 | 0.1111111111  |  | 0.6842105263 | #DIV/0! |
| SYN2    | 0.09523809524 | 0.09523809524 | 0             |  | inf          | #DIV/0! |
| SYN3    | 0.04761904762 | 0.04761904762 | 0.1666666667  |  | 0.2          | #DIV/0! |
| SYNC    | 0.04761904762 | 0.04761904762 | 0.1111111111  |  | 0.325        | #DIV/0! |
| YNDIG   | 0.1904761905  | 0.1904761905  | 0.05555555556 |  | 3.294117647  | #DIV/0! |
| YNDIG1  | 0.04761904762 | 0.04761904762 | 0             |  | inf          | #DIV/0! |
| SYNE2   | 0.09523809524 | 0.09523809524 | 0             |  | inf          | #DIV/0! |
| SYNE4   | 0.04761904762 | 0.04761904762 | 0.05555555556 |  | 0.7          | #DIV/0! |
| YNGAP   | 0.04761904762 | 0.04761904762 | 0             |  | inf          | #DIV/0! |
| SYNGR1  | 0             | 0             | 0.1111111111  |  | 0            | #DIV/0! |
| SYNGR2  | 0.04761904762 | 0.04761904762 | 0             |  | inf          | #DIV/0! |
| SYNGR3  | 0.09523809524 | 0.09523809524 | 0.2222222222  |  | 0.2894736842 | #DIV/0! |
| SYNGR4  | 0.09523809524 | 0.09523809524 | 0.1111111111  |  | 0.6842105263 | #DIV/0! |
| SYNJ1   | 0.04761904762 | 0.04761904762 | 0.1111111111  |  | 0.325        | #DIV/0! |
| SYNM    | 0.04761904762 | 0.04761904762 | 0.05555555556 |  | 0.7          | #DIV/0! |
| SYNPO2  | 0             | 0             | 0.05555555556 |  | 0            | #DIV/0! |
| YNPO2I  | 0.1904761905  | 0.1904761905  | 0.05555555556 |  | 3.294117647  | #DIV/0! |
| SYNPR   | 0.04761904762 | 0.04761904762 | 0             |  | inf          | #DIV/0! |
| YNPR-AS | 0.04761904762 | 0.04761904762 | 0             |  | inf          | #DIV/0! |
| SYPL1   | 0.04761904762 | 0.04761904762 | 0.05555555556 |  | 0.7          | #DIV/0! |
| SYPL2   | 0.04761904762 | 0.04761904762 | 0.05555555556 |  | 0.7          | #DIV/0! |
| SYS1    | 0.1428571429  | 0.1428571429  | 0.1666666667  |  | 0.6666666667 | #DIV/0! |
| Y1-DBN1 | 0.1428571429  | 0.1428571429  | 0.1666666667  |  | 0.6666666667 | #DIV/0! |

|          |               |               |               |  |              |         |
|----------|---------------|---------------|---------------|--|--------------|---------|
| SYT1     | 0.04761904762 | 0.04761904762 | 0.05555555556 |  | 0.7          | #DIV/0! |
| SYT10    | 0.04761904762 | 0.04761904762 | 0.05555555556 |  | 0.7          | #DIV/0! |
| SYT11    | 0.1904761905  | 0.1904761905  | 0.1111111111  |  | 1.529411765  | #DIV/0! |
| SYT14    | 0.1428571429  | 0.1428571429  | 0             |  | inf          | #DIV/0! |
| SYT14P   | 0.04761904762 | 0.04761904762 | 0.05555555556 |  | 0.7          | #DIV/0! |
| SYT15    | 0.1428571429  | 0.1428571429  | 0.05555555556 |  | 2.333333333  | #DIV/0! |
| SYT17    | 0.04761904762 | 0.04761904762 | 0             |  | inf          | #DIV/0! |
| SYT2     | 0.1428571429  | 0.1428571429  | 0             |  | inf          | #DIV/0! |
| SYT3     | 0.09523809524 | 0.09523809524 | 0.05555555556 |  | 1.473684211  | #DIV/0! |
| SYT4     | 0.04761904762 | 0.04761904762 | 0             |  | inf          | #DIV/0! |
| SYT5     | 0.09523809524 | 0.09523809524 | 0.05555555556 |  | 1.473684211  | #DIV/0! |
| SYT6     | 0.04761904762 | 0.04761904762 | 0.05555555556 |  | 0.7          | #DIV/0! |
| SYT8     | 0.04761904762 | 0.04761904762 | 0             |  | inf          | #DIV/0! |
| SYT9     | 0.04761904762 | 0.04761904762 | 0             |  | inf          | #DIV/0! |
| SYTL1    | 0.04761904762 | 0.04761904762 | 0.1111111111  |  | 0.325        | #DIV/0! |
| SZRD1    | 0.04761904762 | 0.04761904762 | 0.1111111111  |  | 0.325        | #DIV/0! |
| SZT2     | 0.04761904762 | 0.04761904762 | 0.05555555556 |  | 0.7          | #DIV/0! |
| ZT2-AS   | 0.04761904762 | 0.04761904762 | 0.05555555556 |  | 0.7          | #DIV/0! |
| TAB1     | 0             | 0             | 0.1111111111  |  | 0            | #DIV/0! |
| TAC1     | 0.04761904762 | 0.04761904762 | 0.05555555556 |  | 0.7          | #DIV/0! |
| TAC3     | 0.1428571429  | 0.1428571429  | 0.05555555556 |  | 2.333333333  | #DIV/0! |
| TAC4     | 0.09523809524 | 0.09523809524 | 0             |  | inf          | #DIV/0! |
| TACC1    | 0.09523809524 | 0.09523809524 | 0.1111111111  |  | 0.6842105263 | #DIV/0! |
| TACC2    | 0.2380952381  | 0.2380952381  | 0.05555555556 |  | 4.375        | #DIV/0! |
| TACC3    | 0.04761904762 | 0.04761904762 | 0             |  | inf          | #DIV/0! |
| TACO1    | 0.04761904762 | 0.04761904762 | 0             |  | inf          | #DIV/0! |
| TACR1    | 0             | 0             | 0.05555555556 |  | 0            | #DIV/0! |
| TACR2    | 0.09523809524 | 0.09523809524 | 0             |  | inf          | #DIV/0! |
| TACR3    | 0             | 0             | 0.05555555556 |  | 0            | #DIV/0! |
| ACSTD    | 0.04761904762 | 0.04761904762 | 0.05555555556 |  | 0.7          | #DIV/0! |
| TADA1    | 0.1428571429  | 0.1428571429  | 0             |  | inf          | #DIV/0! |
| TADA3    | 0.09523809524 | 0.09523809524 | 0             |  | inf          | #DIV/0! |
| TAF10    | 0.04761904762 | 0.04761904762 | 0             |  | inf          | #DIV/0! |
| TAF11    | 0.04761904762 | 0.04761904762 | 0             |  | inf          | #DIV/0! |
| TAF12    | 0.04761904762 | 0.04761904762 | 0.1111111111  |  | 0.325        | #DIV/0! |
| TAF13    | 0.04761904762 | 0.04761904762 | 0.05555555556 |  | 0.7          | #DIV/0! |
| TAF15    | 0.09523809524 | 0.09523809524 | 0             |  | inf          | #DIV/0! |
| TAF1A    | 0.1428571429  | 0.1428571429  | 0.05555555556 |  | 2.333333333  | #DIV/0! |
| TAF1A-AS | 0.1428571429  | 0.1428571429  | 0.05555555556 |  | 2.333333333  | #DIV/0! |
| TAF1B    | 0             | 0             | 0.05555555556 |  | 0            | #DIV/0! |
| TAF1C    | 0.04761904762 | 0.04761904762 | 0             |  | inf          | #DIV/0! |
| TAF1L    | 0.09523809524 | 0.09523809524 | 0.05555555556 |  | 1.473684211  | #DIV/0! |
| TAF2     | 0.09523809524 | 0.09523809524 | 0.1666666667  |  | 0.4210526316 | #DIV/0! |
| TAF3     | 0.09523809524 | 0.09523809524 | 0.1111111111  |  | 0.6842105263 | #DIV/0! |
| TAF4     | 0.1428571429  | 0.1428571429  | 0.2222222222  |  | 0.4583333333 | #DIV/0! |
| TAF4B    | 0.09523809524 | 0.09523809524 | 0.05555555556 |  | 1.473684211  | #DIV/0! |
| TAF5     | 0.1428571429  | 0.1428571429  | 0.05555555556 |  | 2.333333333  | #DIV/0! |
| TAF5L    | 0.1428571429  | 0.1428571429  | 0             |  | inf          | #DIV/0! |
| TAF6     | 0.04761904762 | 0.04761904762 | 0.05555555556 |  | 0.7          | #DIV/0! |
| TAF7     | 0.04761904762 | 0.04761904762 | 0             |  | inf          | #DIV/0! |
| TAF8     | 0.04761904762 | 0.04761904762 | 0.05555555556 |  | 0.7          | #DIV/0! |



|          |               |               |               |  |             |         |
|----------|---------------|---------------|---------------|--|-------------|---------|
| TAF9     | 0.04761904762 | 0.04761904762 | 0.05555555556 |  | 0.7         | #DIV/0! |
| TAFA1    | 0.04761904762 | 0.04761904762 | 0             |  | inf         | #DIV/0! |
| TAFA2    | 0.09523809524 | 0.09523809524 | 0             |  | inf         | #DIV/0! |
| TAFA3    | 0.04761904762 | 0.04761904762 | 0.05555555556 |  | 0.7         | #DIV/0! |
| TAFA4    | 0.04761904762 | 0.04761904762 | 0             |  | inf         | #DIV/0! |
| TAFA5    | 0.04761904762 | 0.04761904762 | 0.16666666667 |  | 0.2         | #DIV/0! |
| TAL1     | 0.04761904762 | 0.04761904762 | 0.05555555556 |  | 0.7         | #DIV/0! |
| TAL2     | 0.04761904762 | 0.04761904762 | 0.05555555556 |  | 0.7         | #DIV/0! |
| TALDO    | 0.04761904762 | 0.04761904762 | 0             |  | inf         | #DIV/0! |
| TAMM4    | 0.09523809524 | 0.09523809524 | 0             |  | inf         | #DIV/0! |
| TANC1    | 0             | 0             | 0.05555555556 |  | 0           | #DIV/0! |
| TANC2    | 0.04761904762 | 0.04761904762 | 0             |  | inf         | #DIV/0! |
| TANGO    | 0.04761904762 | 0.04761904762 | 0.05555555556 |  | 0.7         | #DIV/0! |
| TANGO    | 0.1428571429  | 0.1428571429  | 0.05555555556 |  | 2.333333333 | #DIV/0! |
| TANK     | 0             | 0             | 0.05555555556 |  | 0           | #DIV/0! |
| TAOK1    | 0.04761904762 | 0.04761904762 | 0.05555555556 |  | 0.7         | #DIV/0! |
| TAOK2    | 0.04761904762 | 0.04761904762 | 0             |  | inf         | #DIV/0! |
| TAOK3    | 0             | 0             | 0.05555555556 |  | 0           | #DIV/0! |
| TAP1     | 0.04761904762 | 0.04761904762 | 0             |  | inf         | #DIV/0! |
| TAP2     | 0.04761904762 | 0.04761904762 | 0             |  | inf         | #DIV/0! |
| TAPBP    | 0.04761904762 | 0.04761904762 | 0             |  | inf         | #DIV/0! |
| TAPBPL   | 0.04761904762 | 0.04761904762 | 0.1111111111  |  | 0.325       | #DIV/0! |
| TAPT1    | 0             | 0             | 0             |  |             | #DIV/0! |
| TAPT1-AS | 0             | 0             | 0             |  |             | #DIV/0! |
| TARBP1   | 0.09523809524 | 0.09523809524 | 0.05555555556 |  | 1.473684211 | #DIV/0! |
| TARBP2   | 0.04761904762 | 0.04761904762 | 0.05555555556 |  | 0.7         | #DIV/0! |
| TARDB1   | 0.04761904762 | 0.04761904762 | 0.1111111111  |  | 0.325       | #DIV/0! |
| TARM1    | 0.09523809524 | 0.09523809524 | 0.05555555556 |  | 1.473684211 | #DIV/0! |
| TARP     | 0.04761904762 | 0.04761904762 | 0.2222222222  |  | 0.1375      | #DIV/0! |
| TARS     | 0.04761904762 | 0.04761904762 | 0.1111111111  |  | 0.325       | #DIV/0! |
| TARS2    | 0.1904761905  | 0.1904761905  | 0.05555555556 |  | 3.294117647 | #DIV/0! |
| TARSL2   | 0.04761904762 | 0.04761904762 | 0.05555555556 |  | 0.7         | #DIV/0! |
| TAS1R1   | 0             | 0             | 0.05555555556 |  | 0           | #DIV/0! |
| TAS1R2   | 0.04761904762 | 0.04761904762 | 0.1111111111  |  | 0.325       | #DIV/0! |
| TAS1R3   | 0             | 0             | 0.1111111111  |  | 0           | #DIV/0! |
| TAS2R1   | 0             | 0             | 0.05555555556 |  | 0           | #DIV/0! |
| TAS2R10  | 0.04761904762 | 0.04761904762 | 0.1111111111  |  | 0.325       | #DIV/0! |
| TAS2R13  | 0.04761904762 | 0.04761904762 | 0.1111111111  |  | 0.325       | #DIV/0! |
| TAS2R14  | 0.04761904762 | 0.04761904762 | 0.1111111111  |  | 0.325       | #DIV/0! |
| TAS2R16  | 0.04761904762 | 0.04761904762 | 0.05555555556 |  | 0.7         | #DIV/0! |
| TAS2R19  | 0.04761904762 | 0.04761904762 | 0.1111111111  |  | 0.325       | #DIV/0! |
| TAS2R20  | 0.04761904762 | 0.04761904762 | 0.1111111111  |  | 0.325       | #DIV/0! |
| TAS2R30  | 0.04761904762 | 0.04761904762 | 0.05555555556 |  | 0.7         | #DIV/0! |
| TAS2R30  | 0.04761904762 | 0.04761904762 | 0.1111111111  |  | 0.325       | #DIV/0! |
| TAS2R31  | 0.04761904762 | 0.04761904762 | 0.1111111111  |  | 0.325       | #DIV/0! |
| TAS2R38  | 0.04761904762 | 0.04761904762 | 0.05555555556 |  | 0.7         | #DIV/0! |
| TAS2R39  | 0.04761904762 | 0.04761904762 | 0.05555555556 |  | 0.7         | #DIV/0! |
| TAS2R40  | 0.04761904762 | 0.04761904762 | 0.05555555556 |  | 0.7         | #DIV/0! |
| TAS2R40  | 0.04761904762 | 0.04761904762 | 0.05555555556 |  | 0.7         | #DIV/0! |
| TAS2R41  | 0.04761904762 | 0.04761904762 | 0.05555555556 |  | 0.7         | #DIV/0! |
| TAS2R41  | 0.04761904762 | 0.04761904762 | 0.1111111111  |  | 0.325       | #DIV/0! |

|           |               |               |               |  |              |         |
|-----------|---------------|---------------|---------------|--|--------------|---------|
| TAS2R43   | 0.04761904762 | 0.04761904762 | 0.1111111111  |  | 0.325        | #DIV/0! |
| TAS2R44   | 0.04761904762 | 0.04761904762 | 0.1111111111  |  | 0.325        | #DIV/0! |
| TAS2R50   | 0.04761904762 | 0.04761904762 | 0.05555555556 |  | 0.7          | #DIV/0! |
| TAS2R50   | 0.04761904762 | 0.04761904762 | 0.1111111111  |  | 0.325        | #DIV/0! |
| TAS2R60   | 0.04761904762 | 0.04761904762 | 0.05555555556 |  | 0.7          | #DIV/0! |
| TAS2R70   | 0.04761904762 | 0.04761904762 | 0.1111111111  |  | 0.325        | #DIV/0! |
| TAS2R80   | 0.04761904762 | 0.04761904762 | 0.1111111111  |  | 0.325        | #DIV/0! |
| TAS2R90   | 0.04761904762 | 0.04761904762 | 0.1111111111  |  | 0.325        | #DIV/0! |
| TASOR0    | 0.04761904762 | 0.04761904762 | 0             |  | inf          | #DIV/0! |
| TASOR2    | 0.09523809524 | 0.09523809524 | 0.1666666667  |  | 0.4210526316 | #DIV/0! |
| TASPI     | 0.1904761905  | 0.1904761905  | 0.1111111111  |  | 1.529411765  | #DIV/0! |
| TAT       | 0.04761904762 | 0.04761904762 | 0             |  | inf          | #DIV/0! |
| TAT-AS1   | 0.04761904762 | 0.04761904762 | 0             |  | inf          | #DIV/0! |
| TATDN1    | 0.1428571429  | 0.1428571429  | 0.1111111111  |  | 1.083333333  | #DIV/0! |
| TATDN2    | 0.09523809524 | 0.09523809524 | 0             |  | inf          | #DIV/0! |
| TATDN3    | 0.09523809524 | 0.09523809524 | 0             |  | inf          | #DIV/0! |
| TAX1BP    | 0.04761904762 | 0.04761904762 | 0.2222222222  |  | 0.1375       | #DIV/0! |
| TAX1BP    | 0             | 0             | 0.1111111111  |  | 0            | #DIV/0! |
| TBATA0    | 0.09523809524 | 0.09523809524 | 0             |  | inf          | #DIV/0! |
| BC1D10    | 0.04761904762 | 0.04761904762 | 0.1111111111  |  | 0.325        | #DIV/0! |
| BC1D10    | 0.04761904762 | 0.04761904762 | 0             |  | inf          | #DIV/0! |
| BC1D11    | 0.1428571429  | 0.1428571429  | 0             |  | inf          | #DIV/0! |
| BC1D13    | 0.09523809524 | 0.09523809524 | 0.05555555556 |  | 1.473684211  | #DIV/0! |
| BC1D15    | 0.04761904762 | 0.04761904762 | 0.1111111111  |  | 0.325        | #DIV/0! |
| BC1D16    | 0.04761904762 | 0.04761904762 | 0             |  | inf          | #DIV/0! |
| BC1D17    | 0.09523809524 | 0.09523809524 | 0.1111111111  |  | 0.6842105263 | #DIV/0! |
| TBC1D20   | 0.04761904762 | 0.04761904762 | 0             |  | inf          | #DIV/0! |
| BC1D20    | 0.1904761905  | 0.1904761905  | 0.05555555556 |  | 3.294117647  | #DIV/0! |
| BC1D21    | 0.04761904762 | 0.04761904762 | 0.05555555556 |  | 0.7          | #DIV/0! |
| BC1D22    | 0.04761904762 | 0.04761904762 | 0.1666666667  |  | 0.2          | #DIV/0! |
| BC1D22A   | 0.04761904762 | 0.04761904762 | 0.1111111111  |  | 0.325        | #DIV/0! |
| BC1D22    | 0.04761904762 | 0.04761904762 | 0.05555555556 |  | 0.7          | #DIV/0! |
| BC1D23    | 0.09523809524 | 0.09523809524 | 0.1111111111  |  | 0.6842105263 | #DIV/0! |
| BC1D24    | 0.09523809524 | 0.09523809524 | 0.2222222222  |  | 0.2894736842 | #DIV/0! |
| BC1D26    | 0.04761904762 | 0.04761904762 | 0.05555555556 |  | 0.7          | #DIV/0! |
| BC1D27    | 0.04761904762 | 0.04761904762 | 0.05555555556 |  | 0.7          | #DIV/0! |
| BC1D28    | 0.04761904762 | 0.04761904762 | 0.1111111111  |  | 0.325        | #DIV/0! |
| BC1D21    | 0.04761904762 | 0.04761904762 | 0.05555555556 |  | 0.7          | #DIV/0! |
| BC1D30    | 0.1428571429  | 0.1428571429  | 0.05555555556 |  | 2.333333333  | #DIV/0! |
| BC1D31    | 0.1428571429  | 0.1428571429  | 0.1111111111  |  | 1.083333333  | #DIV/0! |
| BC1D31    | 0.09523809524 | 0.09523809524 | 0.05555555556 |  | 1.473684211  | #DIV/0! |
| BC1D31    | 0.09523809524 | 0.09523809524 | 0.05555555556 |  | 1.473684211  | #DIV/0! |
| BC1D30    | 0.09523809524 | 0.09523809524 | 0.05555555556 |  | 1.473684211  | #DIV/0! |
| BC1D31    | 0.09523809524 | 0.09523809524 | 0.05555555556 |  | 1.473684211  | #DIV/0! |
| BC1D31-DH | 0.1428571429  | 0.1428571429  | 0             |  | inf          | #DIV/0! |
| BC1D3P    | 0.09523809524 | 0.09523809524 | 0             |  | inf          | #DIV/0! |
| BC1D3P    | 0.04761904762 | 0.04761904762 | 0.05555555556 |  | 0.7          | #DIV/0! |
| TBC1D4    | 0             | 0             | 0.05555555556 |  | 0            | #DIV/0! |
| TBC1D5    | 0.04761904762 | 0.04761904762 | 0             |  | inf          | #DIV/0! |
| TBC1D8    | 0             | 0             | 0.05555555556 |  | 0            | #DIV/0! |
| BC1D8-A   | 0             | 0             | 0.05555555556 |  | 0            | #DIV/0! |

|        |               |               |               |  |              |         |
|--------|---------------|---------------|---------------|--|--------------|---------|
| TBC1D9 | 0             | 0             | 0.05555555556 |  | 0            | #DIV/0! |
| BC1D9  | 0.09523809524 | 0.09523809524 | 0.05555555556 |  | 1.473684211  | #DIV/0! |
| TBCA   | 0.04761904762 | 0.04761904762 | 0             |  | inf          | #DIV/0! |
| TBCB   | 0.04761904762 | 0.04761904762 | 0.05555555556 |  | 0.7          | #DIV/0! |
| TBCC   | 0.04761904762 | 0.04761904762 | 0.05555555556 |  | 0.7          | #DIV/0! |
| TBCCD  | 0.09523809524 | 0.09523809524 | 0.05555555556 |  | 1.473684211  | #DIV/0! |
| TBCD   | 0             | 0             | 0             |  |              | #DIV/0! |
| TBCE   | 0.1428571429  | 0.1428571429  | 0.05555555556 |  | 2.333333333  | #DIV/0! |
| TBCK   | 0             | 0             | 0.05555555556 |  | 0            | #DIV/0! |
| TBILA  | 0.09523809524 | 0.09523809524 | 0.05555555556 |  | 1.473684211  | #DIV/0! |
| TBK1   | 0.1428571429  | 0.1428571429  | 0.05555555556 |  | 2.333333333  | #DIV/0! |
| TBKBP1 | 0.1428571429  | 0.1428571429  | 0             |  | inf          | #DIV/0! |
| BL1XR  | 0.1904761905  | 0.1904761905  | 0.05555555556 |  | 3.294117647  | #DIV/0! |
| TBL2   | 0.1428571429  | 0.1428571429  | 0.1111111111  |  | 1.083333333  | #DIV/0! |
| TBL3   | 0.09523809524 | 0.09523809524 | 0.2222222222  |  | 0.2894736842 | #DIV/0! |
| TBPL2  | 0.04761904762 | 0.04761904762 | 0             |  | inf          | #DIV/0! |
| TBR1   | 0             | 0             | 0.05555555556 |  | 0            | #DIV/0! |
| TBRG4  | 0.04761904762 | 0.04761904762 | 0.2222222222  |  | 0.1375       | #DIV/0! |
| TBX1   | 0.04761904762 | 0.04761904762 | 0.05555555556 |  | 0.7          | #DIV/0! |
| TBX15  | 0.04761904762 | 0.04761904762 | 0.05555555556 |  | 0.7          | #DIV/0! |
| TBX19  | 0.1428571429  | 0.1428571429  | 0             |  | inf          | #DIV/0! |
| TBX2   | 0.09523809524 | 0.09523809524 | 0             |  | inf          | #DIV/0! |
| BX2-AS | 0.09523809524 | 0.09523809524 | 0             |  | inf          | #DIV/0! |
| TBX20  | 0.04761904762 | 0.04761904762 | 0.2222222222  |  | 0.1375       | #DIV/0! |
| TBX21  | 0.1428571429  | 0.1428571429  | 0             |  | inf          | #DIV/0! |
| TBX3   | 0             | 0             | 0.05555555556 |  | 0            | #DIV/0! |
| TBX4   | 0.09523809524 | 0.09523809524 | 0             |  | inf          | #DIV/0! |
| TBX5   | 0             | 0             | 0.05555555556 |  | 0            | #DIV/0! |
| BX5-AS | 0             | 0             | 0.05555555556 |  | 0            | #DIV/0! |
| TBX6   | 0.04761904762 | 0.04761904762 | 0             |  | inf          | #DIV/0! |
| TBXA2R | 0.09523809524 | 0.09523809524 | 0.05555555556 |  | 1.473684211  | #DIV/0! |
| TBXAS1 | 0.04761904762 | 0.04761904762 | 0.05555555556 |  | 0.7          | #DIV/0! |
| TCAF1  | 0.04761904762 | 0.04761904762 | 0.05555555556 |  | 0.7          | #DIV/0! |
| TCAF2  | 0.04761904762 | 0.04761904762 | 0             |  | inf          | #DIV/0! |
| CAF2P  | 0.04761904762 | 0.04761904762 | 0             |  | inf          | #DIV/0! |
| TCAM1H | 0.04761904762 | 0.04761904762 | 0             |  | inf          | #DIV/0! |
| TCAP   | 0.09523809524 | 0.09523809524 | 0             |  | inf          | #DIV/0! |
| TCEA1  | 0.1428571429  | 0.1428571429  | 0.1111111111  |  | 1.083333333  | #DIV/0! |
| TCEA2  | 0.1428571429  | 0.1428571429  | 0.2222222222  |  | 0.4583333333 | #DIV/0! |
| TCEA3  | 0.04761904762 | 0.04761904762 | 0.1111111111  |  | 0.325        | #DIV/0! |
| CEANC  | 0.04761904762 | 0.04761904762 | 0.05555555556 |  | 0.7          | #DIV/0! |
| CERG1  | 0.2857142857  | 0.2857142857  | 0             |  | inf          | #DIV/0! |
| ERGIL  | 0.2857142857  | 0.2857142857  | 0             |  | inf          | #DIV/0! |
| TCF12  | 0.04761904762 | 0.04761904762 | 0.05555555556 |  | 0.7          | #DIV/0! |
| TCF15  | 0.1904761905  | 0.1904761905  | 0.05555555556 |  | 3.294117647  | #DIV/0! |
| TCF20  | 0             | 0             | 0.1111111111  |  | 0            | #DIV/0! |
| TCF24  | 0.1428571429  | 0.1428571429  | 0.1666666667  |  | 0.6666666667 | #DIV/0! |
| TCF25  | 0.09523809524 | 0.09523809524 | 0             |  | inf          | #DIV/0! |
| TCF3   | 0.09523809524 | 0.09523809524 | 0.1111111111  |  | 0.6842105263 | #DIV/0! |
| TCF4   | 0.09523809524 | 0.09523809524 | 0.05555555556 |  | 1.473684211  | #DIV/0! |
| CF4-AS | 0.09523809524 | 0.09523809524 | 0.05555555556 |  | 1.473684211  | #DIV/0! |

|         |               |               |               |  |              |         |
|---------|---------------|---------------|---------------|--|--------------|---------|
| TCF7    | 0.04761904762 | 0.04761904762 | 0             |  | inf          | #DIV/0! |
| TCF7L1  | 0             | 0             | 0.05555555556 |  | 0            | #DIV/0! |
| CF7L1-F | 0             | 0             | 0.05555555556 |  | 0            | #DIV/0! |
| TCF7L2  | 0.1428571429  | 0.1428571429  | 0.05555555556 |  | 2.333333333  | #DIV/0! |
| TCFL5   | 0.1428571429  | 0.1428571429  | 0.2222222222  |  | 0.4583333333 | #DIV/0! |
| TCHH    | 0.1904761905  | 0.1904761905  | 0             |  | inf          | #DIV/0! |
| TCHHL1  | 0.1904761905  | 0.1904761905  | 0             |  | inf          | #DIV/0! |
| TCHP    | 0             | 0             | 0.1111111111  |  | 0            | #DIV/0! |
| TCIM    | 0.09523809524 | 0.09523809524 | 0.1111111111  |  | 0.6842105263 | #DIV/0! |
| TCN2    | 0.04761904762 | 0.04761904762 | 0.1111111111  |  | 0.325        | #DIV/0! |
| TCP10L  | 0.04761904762 | 0.04761904762 | 0.1111111111  |  | 0.325        | #DIV/0! |
| TCP11   | 0.04761904762 | 0.04761904762 | 0             |  | inf          | #DIV/0! |
| TCP11L  | 0.04761904762 | 0.04761904762 | 0             |  | inf          | #DIV/0! |
| TCP11L2 | 0.04761904762 | 0.04761904762 | 0.05555555556 |  | 0.7          | #DIV/0! |
| TCTA    | 0.1428571429  | 0.1428571429  | 0             |  | inf          | #DIV/0! |
| TCTE1   | 0.04761904762 | 0.04761904762 | 0.05555555556 |  | 0.7          | #DIV/0! |
| CTEX1D  | 0.04761904762 | 0.04761904762 | 0.05555555556 |  | 0.7          | #DIV/0! |
| CTEX1D  | 0.1428571429  | 0.1428571429  | 0.05555555556 |  | 2.333333333  | #DIV/0! |
| CTEX1D  | 0.04761904762 | 0.04761904762 | 0.05555555556 |  | 0.7          | #DIV/0! |
| TCTN1   | 0             | 0             | 0.1111111111  |  | 0            | #DIV/0! |
| TCTN2   | 0.04761904762 | 0.04761904762 | 0.1111111111  |  | 0.325        | #DIV/0! |
| TCTN3   | 0.1428571429  | 0.1428571429  | 0             |  | inf          | #DIV/0! |
| TDG     | 0.04761904762 | 0.04761904762 | 0.05555555556 |  | 0.7          | #DIV/0! |
| TDH     | 0.09523809524 | 0.09523809524 | 0.1111111111  |  | 0.6842105263 | #DIV/0! |
| TDO2    | 0             | 0             | 0.1111111111  |  | 0            | #DIV/0! |
| TDP2    | 0             | 0             | 0.05555555556 |  | 0            | #DIV/0! |
| TDRD1   | 0.1904761905  | 0.1904761905  | 0.05555555556 |  | 3.294117647  | #DIV/0! |
| TDRD10  | 0.1904761905  | 0.1904761905  | 0.1111111111  |  | 1.529411765  | #DIV/0! |
| TDRD12  | 0.04761904762 | 0.04761904762 | 0.05555555556 |  | 0.7          | #DIV/0! |
| TDRD15  | 0             | 0             | 0.05555555556 |  | 0            | #DIV/0! |
| TDRD5   | 0.1428571429  | 0.1428571429  | 0             |  | inf          | #DIV/0! |
| TDRD6   | 0.04761904762 | 0.04761904762 | 0.05555555556 |  | 0.7          | #DIV/0! |
| TDRD7   | 0.04761904762 | 0.04761904762 | 0             |  | inf          | #DIV/0! |
| TDRG1   | 0             | 0             | 0.05555555556 |  | 0            | #DIV/0! |
| TDRKH   | 0.1904761905  | 0.1904761905  | 0             |  | inf          | #DIV/0! |
| DRKH-A  | 0.1904761905  | 0.1904761905  | 0             |  | inf          | #DIV/0! |
| TDRP    | 0.09523809524 | 0.09523809524 | 0.1111111111  |  | 0.6842105263 | #DIV/0! |
| TEAD2   | 0.09523809524 | 0.09523809524 | 0.1111111111  |  | 0.6842105263 | #DIV/0! |
| TEAD3   | 0.04761904762 | 0.04761904762 | 0.05555555556 |  | 0.7          | #DIV/0! |
| TEAD4   | 0.04761904762 | 0.04761904762 | 0.1666666667  |  | 0.2          | #DIV/0! |
| TEC     | 0.04761904762 | 0.04761904762 | 0.1111111111  |  | 0.325        | #DIV/0! |
| TECPRI  | 0.04761904762 | 0.04761904762 | 0.05555555556 |  | 0.7          | #DIV/0! |
| TECR    | 0.1428571429  | 0.1428571429  | 0.1111111111  |  | 1.083333333  | #DIV/0! |
| TECRL   | 0.04761904762 | 0.04761904762 | 0.05555555556 |  | 0.7          | #DIV/0! |
| TECTB   | 0.1428571429  | 0.1428571429  | 0.05555555556 |  | 2.333333333  | #DIV/0! |
| TEDC2   | 0.09523809524 | 0.09523809524 | 0.2222222222  |  | 0.2894736842 | #DIV/0! |
| TEF     | 0             | 0             | 0.1111111111  |  | 0            | #DIV/0! |
| TEFM    | 0             | 0             | 0             |  |              | #DIV/0! |
| TEK     | 0.04761904762 | 0.04761904762 | 0.05555555556 |  | 0.7          | #DIV/0! |
| TEKT1   | 0             | 0             | 0.05555555556 |  | 0            | #DIV/0! |
| TEKT2   | 0.04761904762 | 0.04761904762 | 0.05555555556 |  | 0.7          | #DIV/0! |

|         |               |               |               |  |              |         |
|---------|---------------|---------------|---------------|--|--------------|---------|
| TEKT3   | 0.04761904762 | 0.04761904762 | 0.05555555556 |  | 0.7          | #DIV/0! |
| TEKT4   | 0             | 0             | 0.1111111111  |  | 0            | #DIV/0! |
| EKT4P   | 0.04761904762 | 0.04761904762 | 0             |  | inf          | #DIV/0! |
| TEKT5   | 0.04761904762 | 0.04761904762 | 0             |  | inf          | #DIV/0! |
| TELO2   | 0.09523809524 | 0.09523809524 | 0.2222222222  |  | 0.2894736842 | #DIV/0! |
| EMN3-A  | 0             | 0             | 0.05555555556 |  | 0            | #DIV/0! |
| TEN1    | 0.04761904762 | 0.04761904762 | 0             |  | inf          | #DIV/0! |
| EN1-CDI | 0.04761904762 | 0.04761904762 | 0             |  | inf          | #DIV/0! |
| TENM2   | 0             | 0             | 0.05555555556 |  | 0            | #DIV/0! |
| TENM3   | 0             | 0             | 0.05555555556 |  | 0            | #DIV/0! |
| ENM3-A  | 0             | 0             | 0.05555555556 |  | 0            | #DIV/0! |
| TENT2   | 0.04761904762 | 0.04761904762 | 0             |  | inf          | #DIV/0! |
| TENT4A  | 0             | 0             | 0.05555555556 |  | 0            | #DIV/0! |
| TENT4B  | 0.04761904762 | 0.04761904762 | 0             |  | inf          | #DIV/0! |
| TENT5B  | 0.04761904762 | 0.04761904762 | 0.1111111111  |  | 0.325        | #DIV/0! |
| TENT5C  | 0.04761904762 | 0.04761904762 | 0.05555555556 |  | 0.7          | #DIV/0! |
| TEP1    | 0.04761904762 | 0.04761904762 | 0             |  | inf          | #DIV/0! |
| TEPP    | 0.04761904762 | 0.04761904762 | 0             |  | inf          | #DIV/0! |
| TEPSIN  | 0.04761904762 | 0.04761904762 | 0             |  | inf          | #DIV/0! |
| TERB1   | 0.09523809524 | 0.09523809524 | 0.05555555556 |  | 1.473684211  | #DIV/0! |
| TERC    | 0.1904761905  | 0.1904761905  | 0.05555555556 |  | 3.294117647  | #DIV/0! |
| TERF1   | 0.1904761905  | 0.1904761905  | 0.1666666667  |  | 0.9411764706 | #DIV/0! |
| TERF2   | 0.1428571429  | 0.1428571429  | 0.05555555556 |  | 2.333333333  | #DIV/0! |
| TERF2II | 0.04761904762 | 0.04761904762 | 0             |  | inf          | #DIV/0! |
| TERT    | 0             | 0             | 0.1111111111  |  | 0            | #DIV/0! |
| TES     | 0.04761904762 | 0.04761904762 | 0.1111111111  |  | 0.325        | #DIV/0! |
| TESC    | 0             | 0             | 0.05555555556 |  | 0            | #DIV/0! |
| ESC-AS  | 0             | 0             | 0.05555555556 |  | 0            | #DIV/0! |
| TESK1   | 0.09523809524 | 0.09523809524 | 0.05555555556 |  | 1.473684211  | #DIV/0! |
| TESK2   | 0.04761904762 | 0.04761904762 | 0.05555555556 |  | 0.7          | #DIV/0! |
| TESPA1  | 0.04761904762 | 0.04761904762 | 0.05555555556 |  | 0.7          | #DIV/0! |
| TET1    | 0.1904761905  | 0.1904761905  | 0.05555555556 |  | 3.294117647  | #DIV/0! |
| TET2    | 0             | 0             | 0.05555555556 |  | 0            | #DIV/0! |
| ET2-AS  | 0             | 0             | 0.05555555556 |  | 0            | #DIV/0! |
| TET3    | 0             | 0             | 0.05555555556 |  | 0            | #DIV/0! |
| TEX10   | 0.04761904762 | 0.04761904762 | 0             |  | inf          | #DIV/0! |
| TEX10I  | 0.04761904762 | 0.04761904762 | 0.05555555556 |  | 0.7          | #DIV/0! |
| TEX14   | 0.1428571429  | 0.1428571429  | 0             |  | inf          | #DIV/0! |
| TEX15   | 0.04761904762 | 0.04761904762 | 0.1111111111  |  | 0.325        | #DIV/0! |
| TEX19   | 0.04761904762 | 0.04761904762 | 0             |  | inf          | #DIV/0! |
| TEX2    | 0.04761904762 | 0.04761904762 | 0             |  | inf          | #DIV/0! |
| TEX21P  | 0.09523809524 | 0.09523809524 | 0             |  | inf          | #DIV/0! |
| TEX261  | 0             | 0             | 0.05555555556 |  | 0            | #DIV/0! |
| TEX264  | 0.04761904762 | 0.04761904762 | 0             |  | inf          | #DIV/0! |
| TEX33   | 0             | 0             | 0.1111111111  |  | 0            | #DIV/0! |
| TEX35   | 0.1428571429  | 0.1428571429  | 0             |  | inf          | #DIV/0! |
| TEX36   | 0.2380952381  | 0.2380952381  | 0.05555555556 |  | 4.375        | #DIV/0! |
| EX36-AS | 0.2380952381  | 0.2380952381  | 0.05555555556 |  | 4.375        | #DIV/0! |
| TEX37   | 0             | 0             | 0.05555555556 |  | 0            | #DIV/0! |
| TEX38   | 0.04761904762 | 0.04761904762 | 0.05555555556 |  | 0.7          | #DIV/0! |
| TEX41   | 0             | 0             | 0.05555555556 |  | 0            | #DIV/0! |

|        |               |               |               |  |              |         |
|--------|---------------|---------------|---------------|--|--------------|---------|
| TEX43  | 0.04761904762 | 0.04761904762 | 0             |  | inf          | #DIV/0! |
| TEX44  | 0             | 0             | 0.05555555556 |  | 0            | #DIV/0! |
| TEX45  | 0.1428571429  | 0.1428571429  | 0.05555555556 |  | 2.333333333  | #DIV/0! |
| TEX46  | 0.04761904762 | 0.04761904762 | 0.1111111111  |  | 0.325        | #DIV/0! |
| TEX47  | 0.09523809524 | 0.09523809524 | 0.1111111111  |  | 0.6842105263 | #DIV/0! |
| TEX48  | 0.04761904762 | 0.04761904762 | 0.05555555556 |  | 0.7          | #DIV/0! |
| TEX49  | 0.04761904762 | 0.04761904762 | 0.05555555556 |  | 0.7          | #DIV/0! |
| TEX50  | 0.1428571429  | 0.1428571429  | 0             |  | inf          | #DIV/0! |
| TEX51  | 0             | 0             | 0.05555555556 |  | 0            | #DIV/0! |
| TEX52  | 0.04761904762 | 0.04761904762 | 0.1666666667  |  | 0.2          | #DIV/0! |
| TEX53  | 0.04761904762 | 0.04761904762 | 0.05555555556 |  | 0.7          | #DIV/0! |
| TEX55  | 0.09523809524 | 0.09523809524 | 0.05555555556 |  | 1.473684211  | #DIV/0! |
| TEX9   | 0.04761904762 | 0.04761904762 | 0.05555555556 |  | 0.7          | #DIV/0! |
| TF     | 0.1428571429  | 0.1428571429  | 0.05555555556 |  | 2.333333333  | #DIV/0! |
| TFAM   | 0.09523809524 | 0.09523809524 | 0.05555555556 |  | 1.473684211  | #DIV/0! |
| TFAMP1 | 0.04761904762 | 0.04761904762 | 0.1666666667  |  | 0.2          | #DIV/0! |
| TFAP2B | 0.04761904762 | 0.04761904762 | 0             |  | inf          | #DIV/0! |
| TFAP2C | 0.09523809524 | 0.09523809524 | 0.1666666667  |  | 0.4210526316 | #DIV/0! |
| TFAP2D | 0.04761904762 | 0.04761904762 | 0             |  | inf          | #DIV/0! |
| TFAP2E | 0.04761904762 | 0.04761904762 | 0.05555555556 |  | 0.7          | #DIV/0! |
| TFAP4  | 0.04761904762 | 0.04761904762 | 0             |  | inf          | #DIV/0! |
| TFB2M  | 0.1428571429  | 0.1428571429  | 0.05555555556 |  | 2.333333333  | #DIV/0! |
| TFCP2  | 0.09523809524 | 0.09523809524 | 0.05555555556 |  | 1.473684211  | #DIV/0! |
| FCP2L  | 0             | 0             | 0.05555555556 |  | 0            | #DIV/0! |
| TFDP2  | 0.1904761905  | 0.1904761905  | 0.05555555556 |  | 3.294117647  | #DIV/0! |
| TFEB   | 0.04761904762 | 0.04761904762 | 0.05555555556 |  | 0.7          | #DIV/0! |
| TFEC   | 0.04761904762 | 0.04761904762 | 0.1111111111  |  | 0.325        | #DIV/0! |
| TFF1   | 0.04761904762 | 0.04761904762 | 0.1111111111  |  | 0.325        | #DIV/0! |
| TFF2   | 0.04761904762 | 0.04761904762 | 0.1111111111  |  | 0.325        | #DIV/0! |
| TFF3   | 0.04761904762 | 0.04761904762 | 0.1111111111  |  | 0.325        | #DIV/0! |
| TFG    | 0.09523809524 | 0.09523809524 | 0.05555555556 |  | 1.473684211  | #DIV/0! |
| TFIP11 | 0.04761904762 | 0.04761904762 | 0.05555555556 |  | 0.7          | #DIV/0! |
| TFPI   | 0             | 0             | 0.05555555556 |  | 0            | #DIV/0! |
| TFPI2  | 0.04761904762 | 0.04761904762 | 0.1111111111  |  | 0.325        | #DIV/0! |
| TFPT   | 0.09523809524 | 0.09523809524 | 0.05555555556 |  | 1.473684211  | #DIV/0! |
| TFR2   | 0.04761904762 | 0.04761904762 | 0.05555555556 |  | 0.7          | #DIV/0! |
| TFRC   | 0.1428571429  | 0.1428571429  | 0.05555555556 |  | 2.333333333  | #DIV/0! |
| TG     | 0.04761904762 | 0.04761904762 | 0.2222222222  |  | 0.1375       | #DIV/0! |
| TGFA   | 0             | 0             | 0.05555555556 |  | 0            | #DIV/0! |
| GFA-IT | 0             | 0             | 0.05555555556 |  | 0            | #DIV/0! |
| TGFB1  | 0.04761904762 | 0.04761904762 | 0.05555555556 |  | 0.7          | #DIV/0! |
| TGFB11 | 0.04761904762 | 0.04761904762 | 0             |  | inf          | #DIV/0! |
| TGFB2  | 0.1428571429  | 0.1428571429  | 0.05555555556 |  | 2.333333333  | #DIV/0! |
| GFB2-A | 0.1428571429  | 0.1428571429  | 0.05555555556 |  | 2.333333333  | #DIV/0! |
| GFB2-O | 0.1428571429  | 0.1428571429  | 0.05555555556 |  | 2.333333333  | #DIV/0! |
| TGFB1  | 0.04761904762 | 0.04761904762 | 0             |  | inf          | #DIV/0! |
| TGFB11 | 0.04761904762 | 0.04761904762 | 0             |  | inf          | #DIV/0! |
| TGFB12 | 0.04761904762 | 0.04761904762 | 0             |  | inf          | #DIV/0! |
| TGFB13 | 0.04761904762 | 0.04761904762 | 0.05555555556 |  | 0.7          | #DIV/0! |
| TGFB14 | 0.1428571429  | 0.1428571429  | 0.05555555556 |  | 2.333333333  | #DIV/0! |
| TGFB15 | 0             | 0             | 0.05555555556 |  | 0            | #DIV/0! |

|         |               |               |              |  |              |         |
|---------|---------------|---------------|--------------|--|--------------|---------|
| TGIF1   | 0.09523809524 | 0.09523809524 | 0            |  | inf          | #DIV/0! |
| TGIF2   | 0.09523809524 | 0.09523809524 | 0.1111111111 |  | 0.6842105263 | #DIV/0! |
| F2-RAB  | 0.09523809524 | 0.09523809524 | 0.1111111111 |  | 0.6842105263 | #DIV/0! |
| TGM2    | 0.1428571429  | 0.1428571429  | 0.1666666667 |  | 0.6666666667 | #DIV/0! |
| TGM3    | 0.1904761905  | 0.1904761905  | 0.0555555556 |  | 3.294117647  | #DIV/0! |
| TGM6    | 0.1904761905  | 0.1904761905  | 0.0555555556 |  | 3.294117647  | #DIV/0! |
| TGOLN2  | 0             | 0             | 0.0555555556 |  | 0            | #DIV/0! |
| TGS1    | 0.1428571429  | 0.1428571429  | 0.1111111111 |  | 1.083333333  | #DIV/0! |
| TH      | 0.04761904762 | 0.04761904762 | 0            |  | inf          | #DIV/0! |
| H2LCR0  | 0.04761904762 | 0.04761904762 | 0            |  | inf          | #DIV/0! |
| THADA   | 0             | 0             | 0.0555555556 |  | 0            | #DIV/0! |
| THAP1   | 0.09523809524 | 0.09523809524 | 0.1666666667 |  | 0.4210526316 | #DIV/0! |
| THAP10  | 0.04761904762 | 0.04761904762 | 0.0555555556 |  | 0.7          | #DIV/0! |
| THAP11  | 0.1428571429  | 0.1428571429  | 0.0555555556 |  | 2.333333333  | #DIV/0! |
| THAP2   | 0.04761904762 | 0.04761904762 | 0.1111111111 |  | 0.325        | #DIV/0! |
| THAP3   | 0             | 0             | 0.0555555556 |  | 0            | #DIV/0! |
| THAP4   | 0             | 0             | 0.0555555556 |  | 0            | #DIV/0! |
| THAP5   | 0.04761904762 | 0.04761904762 | 0.0555555556 |  | 0.7          | #DIV/0! |
| THAP6   | 0.04761904762 | 0.04761904762 | 0.0555555556 |  | 0.7          | #DIV/0! |
| THAP7   | 0.04761904762 | 0.04761904762 | 0.0555555556 |  | 0.7          | #DIV/0! |
| IAP7-AS | 0.04761904762 | 0.04761904762 | 0.0555555556 |  | 0.7          | #DIV/0! |
| THAP8   | 0.04761904762 | 0.04761904762 | 0.0555555556 |  | 0.7          | #DIV/0! |
| THAP9   | 0             | 0             | 0.0555555556 |  | 0            | #DIV/0! |
| IAP9-AS | 0             | 0             | 0.0555555556 |  | 0            | #DIV/0! |
| THBD    | 0.1904761905  | 0.1904761905  | 0.0555555556 |  | 3.294117647  | #DIV/0! |
| THBS1   | 0             | 0             | 0            |  |              | #DIV/0! |
| THBS3   | 0.1904761905  | 0.1904761905  | 0.1111111111 |  | 1.529411765  | #DIV/0! |
| THBS4   | 0.04761904762 | 0.04761904762 | 0            |  | inf          | #DIV/0! |
| HCA15   | 0.04761904762 | 0.04761904762 | 0.1111111111 |  | 0.325        | #DIV/0! |
| HCA15   | 0.1428571429  | 0.1428571429  | 0            |  | inf          | #DIV/0! |
| THEG    | 0.09523809524 | 0.09523809524 | 0.1111111111 |  | 0.6842105263 | #DIV/0! |
| THEG5   | 0.04761904762 | 0.04761904762 | 0.0555555556 |  | 0.7          | #DIV/0! |
| THEM4   | 0.1904761905  | 0.1904761905  | 0            |  | inf          | #DIV/0! |
| THEM5   | 0.1904761905  | 0.1904761905  | 0            |  | inf          | #DIV/0! |
| THEM6   | 0.04761904762 | 0.04761904762 | 0.1666666667 |  | 0.2          | #DIV/0! |
| HEMIS   | 0.04761904762 | 0.04761904762 | 0.1111111111 |  | 0.325        | #DIV/0! |
| THG1L   | 0.04761904762 | 0.04761904762 | 0.0555555556 |  | 0.7          | #DIV/0! |
| THNSL1  | 0.09523809524 | 0.09523809524 | 0.1111111111 |  | 0.6842105263 | #DIV/0! |
| THNSL2  | 0             | 0             | 0.0555555556 |  | 0            | #DIV/0! |
| THOC1   | 0.09523809524 | 0.09523809524 | 0            |  | inf          | #DIV/0! |
| THOC3   | 0.04761904762 | 0.04761904762 | 0.0555555556 |  | 0.7          | #DIV/0! |
| THOC5   | 0.04761904762 | 0.04761904762 | 0.1111111111 |  | 0.325        | #DIV/0! |
| THOC6   | 0.04761904762 | 0.04761904762 | 0.1111111111 |  | 0.325        | #DIV/0! |
| THOC7   | 0.04761904762 | 0.04761904762 | 0            |  | inf          | #DIV/0! |
| IOC7-AS | 0.04761904762 | 0.04761904762 | 0            |  | inf          | #DIV/0! |
| THOP1   | 0.09523809524 | 0.09523809524 | 0.0555555556 |  | 1.473684211  | #DIV/0! |
| HORLN   | 0             | 0             | 0.0555555556 |  | 0            | #DIV/0! |
| THPO    | 0.1428571429  | 0.1428571429  | 0.0555555556 |  | 2.333333333  | #DIV/0! |
| THRA    | 0.09523809524 | 0.09523809524 | 0            |  | inf          | #DIV/0! |
| IRA1/B1 | 0.1428571429  | 0.1428571429  | 0            |  | inf          | #DIV/0! |
| THRAP3  | 0.04761904762 | 0.04761904762 | 0.0555555556 |  | 0.7          | #DIV/0! |

|         |               |               |               |  |             |         |
|---------|---------------|---------------|---------------|--|-------------|---------|
| THR     | 0.04761904762 | 0.04761904762 | 0             |  | inf         | #DIV/0! |
| HRB-AS  | 0.04761904762 | 0.04761904762 | 0             |  | inf         | #DIV/0! |
| THRIL   | 0.04761904762 | 0.04761904762 | 0.05555555556 |  | 0.7         | #DIV/0! |
| THSD4   | 0.04761904762 | 0.04761904762 | 0.05555555556 |  | 0.7         | #DIV/0! |
| HSD4-AS | 0.04761904762 | 0.04761904762 | 0.05555555556 |  | 0.7         | #DIV/0! |
| HSD4-AS | 0.04761904762 | 0.04761904762 | 0.05555555556 |  | 0.7         | #DIV/0! |
| THSD7A  | 0.04761904762 | 0.04761904762 | 0.22222222222 |  | 0.1375      | #DIV/0! |
| THSD7B  | 0             | 0             | 0.05555555556 |  | 0           | #DIV/0! |
| THTPA   | 0             | 0             | 0.05555555556 |  | 0           | #DIV/0! |
| HUMPD   | 0.04761904762 | 0.04761904762 | 0             |  | inf         | #DIV/0! |
| HUMPD   | 0             | 0             | 0.05555555556 |  | 0           | #DIV/0! |
| HUMPD   | 0.09523809524 | 0.09523809524 | 0             |  | inf         | #DIV/0! |
| JMPD3   | 0.09523809524 | 0.09523809524 | 0             |  | inf         | #DIV/0! |
| TIA1    | 0             | 0             | 0.05555555556 |  | 0           | #DIV/0! |
| TIAF1   | 0.04761904762 | 0.04761904762 | 0.05555555556 |  | 0.7         | #DIV/0! |
| TIAL1   | 0.2380952381  | 0.2380952381  | 0             |  | inf         | #DIV/0! |
| TIAM1   | 0.04761904762 | 0.04761904762 | 0.11111111111 |  | 0.325       | #DIV/0! |
| TICAM1  | 0.09523809524 | 0.09523809524 | 0.05555555556 |  | 1.473684211 | #DIV/0! |
| TICAM2  | 0.04761904762 | 0.04761904762 | 0             |  | inf         | #DIV/0! |
| TICRR   | 0.04761904762 | 0.04761904762 | 0.05555555556 |  | 0.7         | #DIV/0! |
| TIE1    | 0.04761904762 | 0.04761904762 | 0.05555555556 |  | 0.7         | #DIV/0! |
| TIFA    | 0             | 0             | 0.05555555556 |  | 0           | #DIV/0! |
| TIFAB   | 0.04761904762 | 0.04761904762 | 0             |  | inf         | #DIV/0! |
| TIGAR   | 0.04761904762 | 0.04761904762 | 0.11111111111 |  | 0.325       | #DIV/0! |
| TIGD1   | 0             | 0             | 0.05555555556 |  | 0           | #DIV/0! |
| TIGD2   | 0             | 0             | 0.05555555556 |  | 0           | #DIV/0! |
| TIGD4   | 0             | 0             | 0.05555555556 |  | 0           | #DIV/0! |
| TIGD5   | 0.04761904762 | 0.04761904762 | 0.16666666667 |  | 0.2         | #DIV/0! |
| TIGD7   | 0.04761904762 | 0.04761904762 | 0.11111111111 |  | 0.325       | #DIV/0! |
| TIGIT   | 0.09523809524 | 0.09523809524 | 0.05555555556 |  | 1.473684211 | #DIV/0! |
| TIMD4   | 0.04761904762 | 0.04761904762 | 0.05555555556 |  | 0.7         | #DIV/0! |
| MELES   | 0.1428571429  | 0.1428571429  | 0.05555555556 |  | 2.333333333 | #DIV/0! |
| IMM10   | 0.04761904762 | 0.04761904762 | 0             |  | inf         | #DIV/0! |
| IMM13   | 0.09523809524 | 0.09523809524 | 0.05555555556 |  | 1.473684211 | #DIV/0! |
| IMM17   | 0.1428571429  | 0.1428571429  | 0             |  | inf         | #DIV/0! |
| IMM22   | 0             | 0             | 0.11111111111 |  | 0           | #DIV/0! |
| IMM23   | 0.04761904762 | 0.04761904762 | 0.05555555556 |  | 0.7         | #DIV/0! |
| IMM23   | 0.04761904762 | 0.04761904762 | 0.05555555556 |  | 0.7         | #DIV/0! |
| M23B-A  | 0.04761904762 | 0.04761904762 | 0.05555555556 |  | 0.7         | #DIV/0! |
| IMM29   | 0.1428571429  | 0.1428571429  | 0.11111111111 |  | 1.083333333 | #DIV/0! |
| IMM44   | 0.1428571429  | 0.1428571429  | 0.05555555556 |  | 2.333333333 | #DIV/0! |
| IMM50   | 0.04761904762 | 0.04761904762 | 0.05555555556 |  | 0.7         | #DIV/0! |
| IMM9    | 0.04761904762 | 0.04761904762 | 0             |  | inf         | #DIV/0! |
| IMMDC   | 0.09523809524 | 0.09523809524 | 0.05555555556 |  | 1.473684211 | #DIV/0! |
| TIMP2   | 0.04761904762 | 0.04761904762 | 0             |  | inf         | #DIV/0! |
| TIMP3   | 0.04761904762 | 0.04761904762 | 0.16666666667 |  | 0.2         | #DIV/0! |
| TIMP4   | 0.09523809524 | 0.09523809524 | 0             |  | inf         | #DIV/0! |
| TINAG   | 0.04761904762 | 0.04761904762 | 0             |  | inf         | #DIV/0! |
| TINCR   | 0.1428571429  | 0.1428571429  | 0.05555555556 |  | 2.333333333 | #DIV/0! |
| TIPARP  | 0.1428571429  | 0.1428571429  | 0.05555555556 |  | 2.333333333 | #DIV/0! |
| PARP-A  | 0.1428571429  | 0.1428571429  | 0.05555555556 |  | 2.333333333 | #DIV/0! |



|             |               |               |               |  |              |         |
|-------------|---------------|---------------|---------------|--|--------------|---------|
| TIPIN       | 0.04761904762 | 0.04761904762 | 0.05555555556 |  | 0.7          | #DIV/0! |
| TIPRL       | 0.1428571429  | 0.1428571429  | 0             |  | inf          | #DIV/0! |
| TJAP1       | 0.04761904762 | 0.04761904762 | 0.05555555556 |  | 0.7          | #DIV/0! |
| TJP2        | 0             | 0             | 0.05555555556 |  | 0            | #DIV/0! |
| TJP3        | 0.09523809524 | 0.09523809524 | 0.05555555556 |  | 1.473684211  | #DIV/0! |
| TK1         | 0.04761904762 | 0.04761904762 | 0             |  | inf          | #DIV/0! |
| TK2         | 0.04761904762 | 0.04761904762 | 0             |  | inf          | #DIV/0! |
| TKT         | 0.04761904762 | 0.04761904762 | 0             |  | inf          | #DIV/0! |
| TKTL2       | 0             | 0             | 0.05555555556 |  | 0            | #DIV/0! |
| TLCD1       | 0.04761904762 | 0.04761904762 | 0.05555555556 |  | 0.7          | #DIV/0! |
| TLCD2       | 0             | 0             | 0.11111111111 |  | 0            | #DIV/0! |
| TLDC2       | 0.09523809524 | 0.09523809524 | 0.11111111111 |  | 0.6842105263 | #DIV/0! |
| TLE1        | 0             | 0             | 0.05555555556 |  | 0            | #DIV/0! |
| TLE2        | 0.09523809524 | 0.09523809524 | 0.05555555556 |  | 1.473684211  | #DIV/0! |
| TLE3        | 0.04761904762 | 0.04761904762 | 0.05555555556 |  | 0.7          | #DIV/0! |
| TLE4        | 0             | 0             | 0.05555555556 |  | 0            | #DIV/0! |
| TLE5        | 0.09523809524 | 0.09523809524 | 0.05555555556 |  | 1.473684211  | #DIV/0! |
| TLE6        | 0.09523809524 | 0.09523809524 | 0.05555555556 |  | 1.473684211  | #DIV/0! |
| TLK1        | 0             | 0             | 0.05555555556 |  | 0            | #DIV/0! |
| TLK2        | 0.04761904762 | 0.04761904762 | 0             |  | inf          | #DIV/0! |
| TLL1        | 0             | 0             | 0.11111111111 |  | 0            | #DIV/0! |
| TLL2        | 0.1428571429  | 0.1428571429  | 0             |  | inf          | #DIV/0! |
| TLN1        | 0.09523809524 | 0.09523809524 | 0.05555555556 |  | 1.473684211  | #DIV/0! |
| TLN2        | 0.04761904762 | 0.04761904762 | 0.05555555556 |  | 0.7          | #DIV/0! |
| TLNRD1      | 0.04761904762 | 0.04761904762 | 0.05555555556 |  | 0.7          | #DIV/0! |
| TLR1        | 0.04761904762 | 0.04761904762 | 0             |  | inf          | #DIV/0! |
| TLR10       | 0.04761904762 | 0.04761904762 | 0             |  | inf          | #DIV/0! |
| TLR2        | 0             | 0             | 0.05555555556 |  | 0            | #DIV/0! |
| TLR3        | 0             | 0             | 0.05555555556 |  | 0            | #DIV/0! |
| TLR4        | 0.04761904762 | 0.04761904762 | 0             |  | inf          | #DIV/0! |
| TLR5        | 0.1428571429  | 0.1428571429  | 0.05555555556 |  | 2.333333333  | #DIV/0! |
| TLR6        | 0.1428571429  | 0.1428571429  | 0.05555555556 |  | 2.333333333  | #DIV/0! |
| TLR9        | 0.04761904762 | 0.04761904762 | 0             |  | inf          | #DIV/0! |
| TLX1        | 0.1428571429  | 0.1428571429  | 0             |  | inf          | #DIV/0! |
| TLX1NB      | 0.1428571429  | 0.1428571429  | 0             |  | inf          | #DIV/0! |
| TLX2        | 0             | 0             | 0.05555555556 |  | 0            | #DIV/0! |
| TLX3        | 0             | 0             | 0.05555555556 |  | 0            | #DIV/0! |
| TM2D1       | 0.04761904762 | 0.04761904762 | 0.05555555556 |  | 0.7          | #DIV/0! |
| TM2D2       | 0.09523809524 | 0.09523809524 | 0.11111111111 |  | 0.6842105263 | #DIV/0! |
| TM2D3       | 0.04761904762 | 0.04761904762 | 0.05555555556 |  | 0.7          | #DIV/0! |
| TM4SF1      | 0.1428571429  | 0.1428571429  | 0.11111111111 |  | 1.083333333  | #DIV/0! |
| TM4SF1-A    | 0.1428571429  | 0.1428571429  | 0.11111111111 |  | 1.083333333  | #DIV/0! |
| TM4SF1B     | 0.1428571429  | 0.1428571429  | 0.11111111111 |  | 1.083333333  | #DIV/0! |
| TM4SF1C     | 0.1428571429  | 0.1428571429  | 0.05555555556 |  | 2.333333333  | #DIV/0! |
| TM4SF19-A   | 0.1428571429  | 0.1428571429  | 0.05555555556 |  | 2.333333333  | #DIV/0! |
| TM4SF19-TCT | 0.1428571429  | 0.1428571429  | 0.05555555556 |  | 2.333333333  | #DIV/0! |
| TM4SF20     | 0             | 0             | 0.05555555556 |  | 0            | #DIV/0! |
| TM4SF4      | 0.1428571429  | 0.1428571429  | 0.11111111111 |  | 1.083333333  | #DIV/0! |
| TM4SF5      | 0             | 0             | 0.11111111111 |  | 0            | #DIV/0! |
| TM6SF1      | 0.04761904762 | 0.04761904762 | 0.05555555556 |  | 0.7          | #DIV/0! |
| TM6SF2      | 0.1428571429  | 0.1428571429  | 0.11111111111 |  | 1.083333333  | #DIV/0! |

|         |               |               |               |  |              |         |
|---------|---------------|---------------|---------------|--|--------------|---------|
| TM7SF3  | 0.04761904762 | 0.04761904762 | 0.05555555556 |  | 0.7          | #DIV/0! |
| TM9SF3  | 0.1428571429  | 0.1428571429  | 0             |  | inf          | #DIV/0! |
| TM9SF4  | 0.09523809524 | 0.09523809524 | 0.1111111111  |  | 0.6842105263 | #DIV/0! |
| TMA16   | 0             | 0             | 0.05555555556 |  | 0            | #DIV/0! |
| TMA7    | 0.09523809524 | 0.09523809524 | 0             |  | inf          | #DIV/0! |
| TMBIM1  | 0             | 0             | 0.05555555556 |  | 0            | #DIV/0! |
| TMBIM4  | 0.09523809524 | 0.09523809524 | 0.05555555556 |  | 1.473684211  | #DIV/0! |
| TMBIM6  | 0.04761904762 | 0.04761904762 | 0.05555555556 |  | 0.7          | #DIV/0! |
| MBIM7   | 0.04761904762 | 0.04761904762 | 0.1111111111  |  | 0.325        | #DIV/0! |
| TMC1    | 0             | 0             | 0.05555555556 |  | 0            | #DIV/0! |
| TMC2    | 0.1904761905  | 0.1904761905  | 0.05555555556 |  | 3.294117647  | #DIV/0! |
| TMC3    | 0.04761904762 | 0.04761904762 | 0.05555555556 |  | 0.7          | #DIV/0! |
| MC3-AS  | 0.04761904762 | 0.04761904762 | 0.05555555556 |  | 0.7          | #DIV/0! |
| TMC4    | 0.09523809524 | 0.09523809524 | 0.05555555556 |  | 1.473684211  | #DIV/0! |
| TMC5    | 0.04761904762 | 0.04761904762 | 0             |  | inf          | #DIV/0! |
| TMC6    | 0.04761904762 | 0.04761904762 | 0             |  | inf          | #DIV/0! |
| TMC7    | 0.04761904762 | 0.04761904762 | 0             |  | inf          | #DIV/0! |
| TMC8    | 0.04761904762 | 0.04761904762 | 0             |  | inf          | #DIV/0! |
| TMCC10  | 0.09523809524 | 0.09523809524 | 0.05555555556 |  | 1.473684211  | #DIV/0! |
| ICC1-A0 | 0.09523809524 | 0.09523809524 | 0.05555555556 |  | 1.473684211  | #DIV/0! |
| TMCC2   | 0.1904761905  | 0.1904761905  | 0             |  | inf          | #DIV/0! |
| TMCC3   | 0.04761904762 | 0.04761904762 | 0.05555555556 |  | 0.7          | #DIV/0! |
| TMCO1   | 0.1428571429  | 0.1428571429  | 0             |  | inf          | #DIV/0! |
| ICO1-A  | 0.1428571429  | 0.1428571429  | 0             |  | inf          | #DIV/0! |
| TMCO2   | 0.04761904762 | 0.04761904762 | 0.05555555556 |  | 0.7          | #DIV/0! |
| TMCO4   | 0.04761904762 | 0.04761904762 | 0.1111111111  |  | 0.325        | #DIV/0! |
| MC05A   | 0             | 0             | 0             |  |              | #DIV/0! |
| TMCO6   | 0.04761904762 | 0.04761904762 | 0             |  | inf          | #DIV/0! |
| TMED1   | 0.1428571429  | 0.1428571429  | 0.1111111111  |  | 1.083333333  | #DIV/0! |
| MED10F  | 0.09523809524 | 0.09523809524 | 0.2222222222  |  | 0.2894736842 | #DIV/0! |
| MED11   | 0.04761904762 | 0.04761904762 | 0             |  | inf          | #DIV/0! |
| TMED2   | 0.04761904762 | 0.04761904762 | 0.1111111111  |  | 0.325        | #DIV/0! |
| TMED3   | 0.04761904762 | 0.04761904762 | 0.05555555556 |  | 0.7          | #DIV/0! |
| TMED4   | 0.04761904762 | 0.04761904762 | 0.2222222222  |  | 0.1375       | #DIV/0! |
| TMED5   | 0.04761904762 | 0.04761904762 | 0.05555555556 |  | 0.7          | #DIV/0! |
| TMED6   | 0.1428571429  | 0.1428571429  | 0.05555555556 |  | 2.333333333  | #DIV/0! |
| TMED7   | 0.04761904762 | 0.04761904762 | 0             |  | inf          | #DIV/0! |
| D7-TIC  | 0.04761904762 | 0.04761904762 | 0             |  | inf          | #DIV/0! |
| TMED9   | 0.09523809524 | 0.09523809524 | 0.05555555556 |  | 1.473684211  | #DIV/0! |
| TMEFF1  | 0.04761904762 | 0.04761904762 | 0             |  | inf          | #DIV/0! |
| TMEFF2  | 0             | 0             | 0.05555555556 |  | 0            | #DIV/0! |
| MEM10   | 0.09523809524 | 0.09523809524 | 0             |  | inf          | #DIV/0! |
| MEM10   | 0.09523809524 | 0.09523809524 | 0             |  | inf          | #DIV/0! |
| MEM10   | 0             | 0             | 0.05555555556 |  | 0            | #DIV/0! |
| MEM10   | 0.04761904762 | 0.04761904762 | 0             |  | inf          | #DIV/0! |
| MEM10C  | 0.04761904762 | 0.04761904762 | 0             |  | inf          | #DIV/0! |
| MEM10C  | 0.04761904762 | 0.04761904762 | 0.2222222222  |  | 0.1375       | #DIV/0! |
| MEM10C  | 0.04761904762 | 0.04761904762 | 0.05555555556 |  | 0.7          | #DIV/0! |
| MEM10   | 0             | 0             | 0.05555555556 |  | 0            | #DIV/0! |
| MEM10   | 0.1428571429  | 0.1428571429  | 0.05555555556 |  | 2.333333333  | #DIV/0! |
| EM108-  | 0.1428571429  | 0.1428571429  | 0.05555555556 |  | 2.333333333  | #DIV/0! |

|       |               |               |               |  |              |         |
|-------|---------------|---------------|---------------|--|--------------|---------|
| MEM11 | 0.09523809524 | 0.09523809524 | 0.05555555556 |  | 1.473684211  | #DIV/0! |
| MEM11 | 0.04761904762 | 0.04761904762 | 0             |  | inf          | #DIV/0! |
| MEM11 | 0.09523809524 | 0.09523809524 | 0             |  | inf          | #DIV/0! |
| MEM11 | 0             | 0             | 0.1111111111  |  | 0            | #DIV/0! |
| MEM11 | 0.04761904762 | 0.04761904762 | 0.05555555556 |  | 0.7          | #DIV/0! |
| MEM11 | 0.04761904762 | 0.04761904762 | 0.05555555556 |  | 0.7          | #DIV/0! |
| MEM12 | 0.1428571429  | 0.1428571429  | 0.1111111111  |  | 1.083333333  | #DIV/0! |
| MEM12 | 0.04761904762 | 0.04761904762 | 0.1111111111  |  | 0.325        | #DIV/0! |
| MEM12 | 0.04761904762 | 0.04761904762 | 0             |  | inf          | #DIV/0! |
| MEM12 | 0.04761904762 | 0.04761904762 | 0.05555555556 |  | 0.7          | #DIV/0! |
| MEM12 | 0             | 0             | 0.1111111111  |  | 0            | #DIV/0! |
| MEM12 | 0.04761904762 | 0.04761904762 | 0             |  | inf          | #DIV/0! |
| MEM13 | 0.04761904762 | 0.04761904762 | 0.05555555556 |  | 0.7          | #DIV/0! |
| MEM13 | 0             | 0             | 0.05555555556 |  | 0            | #DIV/0! |
| MEM13 | 0             | 0             | 0.05555555556 |  | 0            | #DIV/0! |
| MEM13 | 0.09523809524 | 0.09523809524 | 0.05555555556 |  | 1.473684211  | #DIV/0! |
| MEM13 | 0.09523809524 | 0.09523809524 | 0.05555555556 |  | 1.473684211  | #DIV/0! |
| MEM13 | 0.09523809524 | 0.09523809524 | 0.05555555556 |  | 1.473684211  | #DIV/0! |
| MEM13 | 0.09523809524 | 0.09523809524 | 0.05555555556 |  | 1.473684211  | #DIV/0! |
| MEM13 | 0.04761904762 | 0.04761904762 | 0             |  | inf          | #DIV/0! |
| MEM13 | 0.04761904762 | 0.04761904762 | 0.05555555556 |  | 0.7          | #DIV/0! |
| MEM14 | 0.04761904762 | 0.04761904762 | 0.05555555556 |  | 0.7          | #DIV/0! |
| MEM14 | 0.1428571429  | 0.1428571429  | 0.05555555556 |  | 2.333333333  | #DIV/0! |
| MEM14 | 0.09523809524 | 0.09523809524 | 0.1111111111  |  | 0.6842105263 | #DIV/0! |
| MEM14 | 0             | 0             | 0.05555555556 |  | 0            | #DIV/0! |
| MEM14 | 0.04761904762 | 0.04761904762 | 0.05555555556 |  | 0.7          | #DIV/0! |
| MEM14 | 0.04761904762 | 0.04761904762 | 0.05555555556 |  | 0.7          | #DIV/0! |
| MEM14 | 0.04761904762 | 0.04761904762 | 0.05555555556 |  | 0.7          | #DIV/0! |
| MEM14 | 0.04761904762 | 0.04761904762 | 0             |  | inf          | #DIV/0! |
| MEM14 | 0.1904761905  | 0.1904761905  | 0.1111111111  |  | 1.529411765  | #DIV/0! |
| MEM15 | 0             | 0             | 0.05555555556 |  | 0            | #DIV/0! |
| MEM15 | 0.09523809524 | 0.09523809524 | 0.05555555556 |  | 1.473684211  | #DIV/0! |
| MEM15 | 0             | 0             | 0.05555555556 |  | 0            | #DIV/0! |
| MEM15 | 0.04761904762 | 0.04761904762 | 0.05555555556 |  | 0.7          | #DIV/0! |
| MEM15 | 0             | 0             | 0.05555555556 |  | 0            | #DIV/0! |
| MEM15 | 0             | 0             | 0.05555555556 |  | 0            | #DIV/0! |
| MEM15 | 0.1904761905  | 0.1904761905  | 0.05555555556 |  | 3.294117647  | #DIV/0! |
| MEM15 | 0.04761904762 | 0.04761904762 | 0             |  | inf          | #DIV/0! |
| MEM16 | 0.09523809524 | 0.09523809524 | 0.1111111111  |  | 0.6842105263 | #DIV/0! |
| MEM16 | 0.1428571429  | 0.1428571429  | 0.1111111111  |  | 1.083333333  | #DIV/0! |
| MEM16 | 0.04761904762 | 0.04761904762 | 0             |  | inf          | #DIV/0! |
| MEM16 | 0.04761904762 | 0.04761904762 | 0             |  | inf          | #DIV/0! |
| MEM16 | 0             | 0             | 0.05555555556 |  | 0            | #DIV/0! |
| MEM16 | 0.1904761905  | 0.1904761905  | 0.05555555556 |  | 3.294117647  | #DIV/0! |
| MEM16 | 0.04761904762 | 0.04761904762 | 0.05555555556 |  | 0.7          | #DIV/0! |
| MEM16 | 0.04761904762 | 0.04761904762 | 0.05555555556 |  | 0.7          | #DIV/0! |
| MEM16 | 0.04761904762 | 0.04761904762 | 0.05555555556 |  | 0.7          | #DIV/0! |
| MEM16 | 0             | 0             | 0.05555555556 |  | 0            | #DIV/0! |
| MEM17 | 0             | 0             | 0.05555555556 |  | 0            | #DIV/0! |
| MEM17 | 0.04761904762 | 0.04761904762 | 0             |  | inf          | #DIV/0! |

|           |               |               |               |  |              |         |
|-----------|---------------|---------------|---------------|--|--------------|---------|
| MEM170    | 0.04761904762 | 0.04761904762 | 0             |  | inf          | #DIV/0! |
| MEM17     | 0             | 0             | 0.05555555556 |  | 0            | #DIV/0! |
| MEM170    | 0.04761904762 | 0.04761904762 | 0             |  | inf          | #DIV/0! |
| MEM17     | 0             | 0             | 0.05555555556 |  | 0            | #DIV/0! |
| MEM170    | 0.04761904762 | 0.04761904762 | 0             |  | inf          | #DIV/0! |
| MEM176    | 0.09523809524 | 0.09523809524 | 0.05555555556 |  | 1.473684211  | #DIV/0! |
| MEM176    | 0.09523809524 | 0.09523809524 | 0.05555555556 |  | 1.473684211  | #DIV/0! |
| MEM17     | 0             | 0             | 0.05555555556 |  | 0            | #DIV/0! |
| MEM178    | 0             | 0             | 0.05555555556 |  | 0            | #DIV/0! |
| MEM178    | 0.04761904762 | 0.04761904762 | 0.1111111111  |  | 0.325        | #DIV/0! |
| MEM18     | 0             | 0             | 0.05555555556 |  | 0            | #DIV/0! |
| MEM18     | 0             | 0             | 0.05555555556 |  | 0            | #DIV/0! |
| MEM183    | 0.1428571429  | 0.1428571429  | 0             |  | inf          | #DIV/0! |
| MEM183    | 0.1904761905  | 0.1904761905  | 0.1111111111  |  | 1.529411765  | #DIV/0! |
| MEM184    | 0.04761904762 | 0.04761904762 | 0.1666666667  |  | 0.2          | #DIV/0! |
| MEM184    | 0.04761904762 | 0.04761904762 | 0.1111111111  |  | 0.325        | #DIV/0! |
| MEM184    | 0             | 0             | 0.05555555556 |  | 0            | #DIV/0! |
| MEM185    | 0             | 0             | 0.05555555556 |  | 0            | #DIV/0! |
| MEM180    | 0.09523809524 | 0.09523809524 | 0             |  | inf          | #DIV/0! |
| MEM180    | 0.09523809524 | 0.09523809524 | 0.1666666667  |  | 0.4210526316 | #DIV/0! |
| MEM189-UB | 0.09523809524 | 0.09523809524 | 0.1666666667  |  | 0.4210526316 | #DIV/0! |
| MEM19     | 0.04761904762 | 0.04761904762 | 0.1111111111  |  | 0.325        | #DIV/0! |
| MEM190    | 0.09523809524 | 0.09523809524 | 0.05555555556 |  | 1.473684211  | #DIV/0! |
| MEM191    | 0.04761904762 | 0.04761904762 | 0.05555555556 |  | 0.7          | #DIV/0! |
| MEM191    | 0.04761904762 | 0.04761904762 | 0.05555555556 |  | 0.7          | #DIV/0! |
| MEM191    | 0.04761904762 | 0.04761904762 | 0.05555555556 |  | 0.7          | #DIV/0! |
| MEM191    | 0.04761904762 | 0.04761904762 | 0.05555555556 |  | 0.7          | #DIV/0! |
| MEM190    | 0.04761904762 | 0.04761904762 | 0.2222222222  |  | 0.1375       | #DIV/0! |
| MEM19     | 0             | 0             | 0.05555555556 |  | 0            | #DIV/0! |
| MEM198    | 0.04761904762 | 0.04761904762 | 0.05555555556 |  | 0.7          | #DIV/0! |
| MEM190    | 0.04761904762 | 0.04761904762 | 0.05555555556 |  | 0.7          | #DIV/0! |
| MEM200    | 0.04761904762 | 0.04761904762 | 0.1111111111  |  | 0.325        | #DIV/0! |
| MEM200    | 0.09523809524 | 0.09523809524 | 0             |  | inf          | #DIV/0! |
| MEM20     | 0             | 0             | 0.05555555556 |  | 0            | #DIV/0! |
| MEM200    | 0.04761904762 | 0.04761904762 | 0.05555555556 |  | 0.7          | #DIV/0! |
| MEM202-   | 0.04761904762 | 0.04761904762 | 0.05555555556 |  | 0.7          | #DIV/0! |
| MEM20     | 0.1428571429  | 0.1428571429  | 0.05555555556 |  | 2.333333333  | #DIV/0! |
| MEM200    | 0.09523809524 | 0.09523809524 | 0.2222222222  |  | 0.2894736842 | #DIV/0! |
| MEM200    | 0.09523809524 | 0.09523809524 | 0             |  | inf          | #DIV/0! |
| MEM200    | 0.09523809524 | 0.09523809524 | 0.1111111111  |  | 0.6842105263 | #DIV/0! |
| MEM20     | 0.1428571429  | 0.1428571429  | 0.05555555556 |  | 2.333333333  | #DIV/0! |
| MEM200    | 0.04761904762 | 0.04761904762 | 0.05555555556 |  | 0.7          | #DIV/0! |
| MEM21     | 0.1428571429  | 0.1428571429  | 0.05555555556 |  | 2.333333333  | #DIV/0! |
| MEM210    | 0.04761904762 | 0.04761904762 | 0.05555555556 |  | 0.7          | #DIV/0! |
| MEM21     | 0.1904761905  | 0.1904761905  | 0.1111111111  |  | 1.529411765  | #DIV/0! |
| MEM212-   | 0.1904761905  | 0.1904761905  | 0.1111111111  |  | 1.529411765  | #DIV/0! |
| MEM210    | 0.04761904762 | 0.04761904762 | 0.05555555556 |  | 0.7          | #DIV/0! |
| MEM210    | 0.09523809524 | 0.09523809524 | 0.05555555556 |  | 1.473684211  | #DIV/0! |
| MEM210    | 0.04761904762 | 0.04761904762 | 0.05555555556 |  | 0.7          | #DIV/0! |
| MEM210    | 0.04761904762 | 0.04761904762 | 0             |  | inf          | #DIV/0! |
| MEM220    | 0.04761904762 | 0.04761904762 | 0.05555555556 |  | 0.7          | #DIV/0! |

|           |               |               |               |  |              |         |
|-----------|---------------|---------------|---------------|--|--------------|---------|
| EM220-    | 0.04761904762 | 0.04761904762 | 0.05555555556 |  | 0.7          | #DIV/0! |
| MEM22     | 0.04761904762 | 0.04761904762 | 0.11111111111 |  | 0.325        | #DIV/0! |
| MEM225    | 0.04761904762 | 0.04761904762 | 0.05555555556 |  | 0.7          | #DIV/0! |
| MEM229    | 0.04761904762 | 0.04761904762 | 0.05555555556 |  | 0.7          | #DIV/0! |
| MEM23     | 0.1904761905  | 0.1904761905  | 0.05555555556 |  | 3.294117647  | #DIV/0! |
| MEM23     | 0.04761904762 | 0.04761904762 | 0             |  | inf          | #DIV/0! |
| MEM23     | 0.04761904762 | 0.04761904762 | 0             |  | inf          | #DIV/0! |
| MEM23     | 0             | 0             | 0.05555555556 |  | 0            | #DIV/0! |
| MEM23     | 0.04761904762 | 0.04761904762 | 0.11111111111 |  | 0.325        | #DIV/0! |
| MEM23     | 0.04761904762 | 0.04761904762 | 0             |  | inf          | #DIV/0! |
| MEM23     | 0.09523809524 | 0.09523809524 | 0.11111111111 |  | 0.6842105263 | #DIV/0! |
| MEM23     | 0             | 0             | 0.05555555556 |  | 0            | #DIV/0! |
| MEM23     | 0.09523809524 | 0.09523809524 | 0.05555555556 |  | 1.473684211  | #DIV/0! |
| MEM238    | 0.04761904762 | 0.04761904762 | 0.05555555556 |  | 0.7          | #DIV/0! |
| MEM23     | 0.1904761905  | 0.1904761905  | 0.05555555556 |  | 3.294117647  | #DIV/0! |
| MEM24     | 0             | 0             | 0.11111111111 |  | 0            | #DIV/0! |
| MEM24     | 0.04761904762 | 0.04761904762 | 0.05555555556 |  | 0.7          | #DIV/0! |
| MEM24     | 0.09523809524 | 0.09523809524 | 0.05555555556 |  | 1.473684211  | #DIV/0! |
| MEM24     | 0.04761904762 | 0.04761904762 | 0.05555555556 |  | 0.7          | #DIV/0! |
| MEM24     | 0.04761904762 | 0.04761904762 | 0             |  | inf          | #DIV/0! |
| EM246-    | 0.04761904762 | 0.04761904762 | 0             |  | inf          | #DIV/0! |
| MEM24     | 0             | 0             | 0.05555555556 |  | 0            | #DIV/0! |
| MEM24     | 0.04761904762 | 0.04761904762 | 0.11111111111 |  | 0.325        | #DIV/0! |
| MEM24     | 0.04761904762 | 0.04761904762 | 0.16666666667 |  | 0.2          | #DIV/0! |
| MEM25     | 0.1428571429  | 0.1428571429  | 0.05555555556 |  | 2.333333333  | #DIV/0! |
| MEM25     | 0             | 0             | 0.05555555556 |  | 0            | #DIV/0! |
| MEM25     | 0.1428571429  | 0.1428571429  | 0             |  | inf          | #DIV/0! |
| EM254-    | 0.1428571429  | 0.1428571429  | 0             |  | inf          | #DIV/0! |
| MEM25     | 0             | 0             | 0.05555555556 |  | 0            | #DIV/0! |
| MEM256-PL | 0             | 0             | 0.05555555556 |  | 0            | #DIV/0! |
| MEM25     | 0.09523809524 | 0.09523809524 | 0.11111111111 |  | 0.6842105263 | #DIV/0! |
| MEM26     | 0.04761904762 | 0.04761904762 | 0.11111111111 |  | 0.325        | #DIV/0! |
| MEM26-A   | 0.04761904762 | 0.04761904762 | 0.11111111111 |  | 0.325        | #DIV/0! |
| MEM26     | 0.04761904762 | 0.04761904762 | 0             |  | inf          | #DIV/0! |
| MEM26     | 0.04761904762 | 0.04761904762 | 0.05555555556 |  | 0.7          | #DIV/0! |
| MEM26     | 0.04761904762 | 0.04761904762 | 0             |  | inf          | #DIV/0! |
| MEM26     | 0.04761904762 | 0.04761904762 | 0.05555555556 |  | 0.7          | #DIV/0! |
| MEM26     | 0.04761904762 | 0.04761904762 | 0.05555555556 |  | 0.7          | #DIV/0! |
| MEM26     | 0.04761904762 | 0.04761904762 | 0.05555555556 |  | 0.7          | #DIV/0! |
| MEM26     | 0.04761904762 | 0.04761904762 | 0.05555555556 |  | 0.7          | #DIV/0! |
| MEM26     | 0.04761904762 | 0.04761904762 | 0.05555555556 |  | 0.7          | #DIV/0! |
| MEM27     | 0.1428571429  | 0.1428571429  | 0.11111111111 |  | 1.083333333  | #DIV/0! |
| MEM27     | 0.04761904762 | 0.04761904762 | 0             |  | inf          | #DIV/0! |
| MEM27     | 0.09523809524 | 0.09523809524 | 0.05555555556 |  | 1.473684211  | #DIV/0! |
| MEM27     | 0             | 0             | 0.11111111111 |  | 0            | #DIV/0! |
| MEM27     | 0.04761904762 | 0.04761904762 | 0.05555555556 |  | 0.7          | #DIV/0! |
| MEM30     | 0.09523809524 | 0.09523809524 | 0.11111111111 |  | 0.6842105263 | #DIV/0! |
| MEM33     | 0.04761904762 | 0.04761904762 | 0             |  | inf          | #DIV/0! |
| MEM35     | 0.04761904762 | 0.04761904762 | 0.05555555556 |  | 0.7          | #DIV/0! |
| MEM37     | 0             | 0             | 0.05555555556 |  | 0            | #DIV/0! |
| MEM38     | 0.1428571429  | 0.1428571429  | 0.11111111111 |  | 1.083333333  | #DIV/0! |
| MEM38     | 0.04761904762 | 0.04761904762 | 0.05555555556 |  | 0.7          | #DIV/0! |

|          |               |               |               |  |              |         |
|----------|---------------|---------------|---------------|--|--------------|---------|
| MEM39    | 0.04761904762 | 0.04761904762 | 0.1111111111  |  | 0.325        | #DIV/0! |
| MEM40    | 0.09523809524 | 0.09523809524 | 0             |  | inf          | #DIV/0! |
| MEM41    | 0.1428571429  | 0.1428571429  | 0.05555555556 |  | 2.333333333  | #DIV/0! |
| MEM41    | 0.04761904762 | 0.04761904762 | 0.05555555556 |  | 0.7          | #DIV/0! |
| MEM43    | 0.04761904762 | 0.04761904762 | 0             |  | inf          | #DIV/0! |
| MEM44    | 0.09523809524 | 0.09523809524 | 0.05555555556 |  | 1.473684211  | #DIV/0! |
| MEM44-A  | 0.09523809524 | 0.09523809524 | 0.05555555556 |  | 1.473684211  | #DIV/0! |
| MEM45    | 0.09523809524 | 0.09523809524 | 0.05555555556 |  | 1.473684211  | #DIV/0! |
| MEM50    | 0.04761904762 | 0.04761904762 | 0.1111111111  |  | 0.325        | #DIV/0! |
| MEM50    | 0.04761904762 | 0.04761904762 | 0.1111111111  |  | 0.325        | #DIV/0! |
| MEM50    | 0.04761904762 | 0.04761904762 | 0.1111111111  |  | 0.325        | #DIV/0! |
| MEM51-A  | 0.04761904762 | 0.04761904762 | 0.1111111111  |  | 0.325        | #DIV/0! |
| MEM52    | 0             | 0             | 0.1111111111  |  | 0            | #DIV/0! |
| MEM52    | 0.04761904762 | 0.04761904762 | 0.1111111111  |  | 0.325        | #DIV/0! |
| MEM53    | 0.04761904762 | 0.04761904762 | 0.05555555556 |  | 0.7          | #DIV/0! |
| MEM54    | 0.04761904762 | 0.04761904762 | 0.1111111111  |  | 0.325        | #DIV/0! |
| MEM55    | 0.04761904762 | 0.04761904762 | 0.05555555556 |  | 0.7          | #DIV/0! |
| MEM56-RW | 0.04761904762 | 0.04761904762 | 0.05555555556 |  | 0.7          | #DIV/0! |
| MEM59    | 0.04761904762 | 0.04761904762 | 0.05555555556 |  | 0.7          | #DIV/0! |
| MEM59    | 0.1428571429  | 0.1428571429  | 0.1111111111  |  | 1.083333333  | #DIV/0! |
| MEM60    | 0.04761904762 | 0.04761904762 | 0.1111111111  |  | 0.325        | #DIV/0! |
| MEM60    | 0.04761904762 | 0.04761904762 | 0.05555555556 |  | 0.7          | #DIV/0! |
| MEM63    | 0.1428571429  | 0.1428571429  | 0.05555555556 |  | 2.333333333  | #DIV/0! |
| MEM63    | 0.04761904762 | 0.04761904762 | 0.05555555556 |  | 0.7          | #DIV/0! |
| MEM64    | 0.1904761905  | 0.1904761905  | 0.1111111111  |  | 1.529411765  | #DIV/0! |
| MEM65    | 0.1428571429  | 0.1428571429  | 0.1111111111  |  | 1.083333333  | #DIV/0! |
| MEM66    | 0.1904761905  | 0.1904761905  | 0.1111111111  |  | 1.529411765  | #DIV/0! |
| MEM68    | 0.1428571429  | 0.1428571429  | 0.1111111111  |  | 1.083333333  | #DIV/0! |
| MEM69    | 0.04761904762 | 0.04761904762 | 0.05555555556 |  | 0.7          | #DIV/0! |
| MEM70    | 0.1904761905  | 0.1904761905  | 0.1111111111  |  | 1.529411765  | #DIV/0! |
| MEM70    | 0.04761904762 | 0.04761904762 | 0.1666666667  |  | 0.2          | #DIV/0! |
| MEM72    | 0.1428571429  | 0.1428571429  | 0.05555555556 |  | 2.333333333  | #DIV/0! |
| MEM72-A  | 0.1428571429  | 0.1428571429  | 0.05555555556 |  | 2.333333333  | #DIV/0! |
| MEM74    | 0.1904761905  | 0.1904761905  | 0.1111111111  |  | 1.529411765  | #DIV/0! |
| MEM74    | 0.1904761905  | 0.1904761905  | 0.1111111111  |  | 1.529411765  | #DIV/0! |
| MEM75    | 0.09523809524 | 0.09523809524 | 0.1111111111  |  | 0.6842105263 | #DIV/0! |
| MEM80    | 0.04761904762 | 0.04761904762 | 0             |  | inf          | #DIV/0! |
| MEM81    | 0.1904761905  | 0.1904761905  | 0             |  | inf          | #DIV/0! |
| MEM82    | 0.04761904762 | 0.04761904762 | 0.1111111111  |  | 0.325        | #DIV/0! |
| MEM86    | 0.09523809524 | 0.09523809524 | 0.05555555556 |  | 1.473684211  | #DIV/0! |
| MEM87    | 0             | 0             | 0.05555555556 |  | 0            | #DIV/0! |
| MEM88    | 0             | 0             | 0.05555555556 |  | 0            | #DIV/0! |
| MEM88    | 0             | 0             | 0.1111111111  |  | 0            | #DIV/0! |
| MEM89    | 0.09523809524 | 0.09523809524 | 0             |  | inf          | #DIV/0! |
| MEM89    | 0.04761904762 | 0.04761904762 | 0.2222222222  |  | 0.1375       | #DIV/0! |
| MEM89    | 0.09523809524 | 0.09523809524 | 0.05555555556 |  | 1.473684211  | #DIV/0! |
| MEM90    | 0.1428571429  | 0.1428571429  | 0             |  | inf          | #DIV/0! |
| MEM90    | 0.04761904762 | 0.04761904762 | 0.05555555556 |  | 0.7          | #DIV/0! |
| MEM92    | 0.09523809524 | 0.09523809524 | 0             |  | inf          | #DIV/0! |
| MEM92-A  | 0.09523809524 | 0.09523809524 | 0             |  | inf          | #DIV/0! |
| MEM93    | 0             | 0             | 0.05555555556 |  | 0            | #DIV/0! |

|         |               |               |               |  |              |         |
|---------|---------------|---------------|---------------|--|--------------|---------|
| MEM9    | 0.04761904762 | 0.04761904762 | 0.05555555556 |  | 0.7          | #DIV/0! |
| MEM9    | 0.04761904762 | 0.04761904762 | 0             |  | inf          | #DIV/0! |
| MEM9    | 0.09523809524 | 0.09523809524 | 0             |  | inf          | #DIV/0! |
| TMF1    | 0.04761904762 | 0.04761904762 | 0             |  | inf          | #DIV/0! |
| MIGD1   | 0             | 0             | 0.05555555556 |  | 0            | #DIV/0! |
| MIGD2   | 0.09523809524 | 0.09523809524 | 0.05555555556 |  | 1.473684211  | #DIV/0! |
| MIGD3   | 0.04761904762 | 0.04761904762 | 0             |  | inf          | #DIV/0! |
| MOD1    | 0.04761904762 | 0.04761904762 | 0             |  | inf          | #DIV/0! |
| MOD2    | 0.04761904762 | 0.04761904762 | 0.05555555556 |  | 0.7          | #DIV/0! |
| MOD3    | 0.04761904762 | 0.04761904762 | 0.05555555556 |  | 0.7          | #DIV/0! |
| MOD4    | 0.1904761905  | 0.1904761905  | 0.05555555556 |  | 3.294117647  | #DIV/0! |
| MPO     | 0.04761904762 | 0.04761904762 | 0.05555555556 |  | 0.7          | #DIV/0! |
| MPO-AS  | 0.04761904762 | 0.04761904762 | 0.05555555556 |  | 0.7          | #DIV/0! |
| IPRSS1  | 0.04761904762 | 0.04761904762 | 0.05555555556 |  | 0.7          | #DIV/0! |
| IPRSS1  | 0.04761904762 | 0.04761904762 | 0.05555555556 |  | 0.7          | #DIV/0! |
| PRSS11  | 0.04761904762 | 0.04761904762 | 0.05555555556 |  | 0.7          | #DIV/0! |
| IPRSS1  | 0.04761904762 | 0.04761904762 | 0.05555555556 |  | 0.7          | #DIV/0! |
| IPRSS1  | 0.04761904762 | 0.04761904762 | 0.05555555556 |  | 0.7          | #DIV/0! |
| IPRSS1  | 0.04761904762 | 0.04761904762 | 0.05555555556 |  | 0.7          | #DIV/0! |
| PRSS11  | 0.04761904762 | 0.04761904762 | 0.05555555556 |  | 0.7          | #DIV/0! |
| MPRSS1  | 0.09523809524 | 0.09523809524 | 0.05555555556 |  | 1.473684211  | #DIV/0! |
| MPRSS1  | 0.04761904762 | 0.04761904762 | 0.05555555556 |  | 0.7          | #DIV/0! |
| MPRSS0  | 0.04761904762 | 0.04761904762 | 0.11111111111 |  | 0.325        | #DIV/0! |
| MPRSS0  | 0.04761904762 | 0.04761904762 | 0.11111111111 |  | 0.325        | #DIV/0! |
| MPRSS   | 0             | 0             | 0.11111111111 |  | 0            | #DIV/0! |
| MPRSS0  | 0.09523809524 | 0.09523809524 | 0.05555555556 |  | 1.473684211  | #DIV/0! |
| TMSB10  | 0             | 0             | 0.05555555556 |  | 0            | #DIV/0! |
| TMTC1   | 0.04761904762 | 0.04761904762 | 0.05555555556 |  | 0.7          | #DIV/0! |
| TMTC2   | 0.04761904762 | 0.04761904762 | 0.05555555556 |  | 0.7          | #DIV/0! |
| TMTC3   | 0.04761904762 | 0.04761904762 | 0.05555555556 |  | 0.7          | #DIV/0! |
| TMUB1   | 0.09523809524 | 0.09523809524 | 0.05555555556 |  | 1.473684211  | #DIV/0! |
| TMUB2   | 0.09523809524 | 0.09523809524 | 0             |  | inf          | #DIV/0! |
| TMX1    | 0.04761904762 | 0.04761904762 | 0             |  | inf          | #DIV/0! |
| TMX4    | 0.1904761905  | 0.1904761905  | 0.16666666667 |  | 0.9411764706 | #DIV/0! |
| TNC     | 0.04761904762 | 0.04761904762 | 0.05555555556 |  | 0.7          | #DIV/0! |
| TNF     | 0.04761904762 | 0.04761904762 | 0             |  | inf          | #DIV/0! |
| NFAIP0  | 0.04761904762 | 0.04761904762 | 0.05555555556 |  | 0.7          | #DIV/0! |
| NFAIP0  | 0             | 0             | 0.05555555556 |  | 0            | #DIV/0! |
| NFAIP0  | 0.04761904762 | 0.04761904762 | 0             |  | inf          | #DIV/0! |
| NFAIP8  | 0.09523809524 | 0.09523809524 | 0.05555555556 |  | 1.473684211  | #DIV/0! |
| NFAIP8  | 0.1904761905  | 0.1904761905  | 0.05555555556 |  | 3.294117647  | #DIV/0! |
| IP8L2-S | 0.1904761905  | 0.1904761905  | 0.05555555556 |  | 3.294117647  | #DIV/0! |
| NFAIP8  | 0.04761904762 | 0.04761904762 | 0.05555555556 |  | 0.7          | #DIV/0! |
| NFRSF10 | 0.04761904762 | 0.04761904762 | 0.11111111111 |  | 0.325        | #DIV/0! |
| NFRSF10 | 0.04761904762 | 0.04761904762 | 0.11111111111 |  | 0.325        | #DIV/0! |
| NFRSF10 | 0.04761904762 | 0.04761904762 | 0.11111111111 |  | 0.325        | #DIV/0! |
| NFRSF10 | 0.04761904762 | 0.04761904762 | 0.11111111111 |  | 0.325        | #DIV/0! |
| NFRSF10 | 0.09523809524 | 0.09523809524 | 0             |  | inf          | #DIV/0! |
| NFRSF10 | 0.09523809524 | 0.09523809524 | 0.16666666667 |  | 0.4210526316 | #DIV/0! |
| NFRSF12 | 0.04761904762 | 0.04761904762 | 0.11111111111 |  | 0.325        | #DIV/0! |
| NFRSF13 | 0.04761904762 | 0.04761904762 | 0.05555555556 |  | 0.7          | #DIV/0! |

|           |               |               |               |  |              |         |
|-----------|---------------|---------------|---------------|--|--------------|---------|
| NFRSF13   | 0             | 0             | 0.1111111111  |  | 0            | #DIV/0! |
| NFRSF1    | 0             | 0             | 0.1111111111  |  | 0            | #DIV/0! |
| NFRSF14   | 0             | 0             | 0.1111111111  |  | 0            | #DIV/0! |
| NFRSF10   | 0.04761904762 | 0.04761904762 | 0             |  | inf          | #DIV/0! |
| NFRSF1    | 0             | 0             | 0.1111111111  |  | 0            | #DIV/0! |
| NFRSF10   | 0.04761904762 | 0.04761904762 | 0.1111111111  |  | 0.325        | #DIV/0! |
| NFRSF10   | 0.04761904762 | 0.04761904762 | 0.1111111111  |  | 0.325        | #DIV/0! |
| NFRSF20   | 0.04761904762 | 0.04761904762 | 0.05555555556 |  | 0.7          | #DIV/0! |
| NFRSF2    | 0             | 0             | 0.05555555556 |  | 0            | #DIV/0! |
| NFRSF     | 0             | 0             | 0.1111111111  |  | 0            | #DIV/0! |
| NFRSF6    | 0.1428571429  | 0.1428571429  | 0.2222222222  |  | 0.4583333333 | #DIV/0! |
| NFRSF0    | 0.04761904762 | 0.04761904762 | 0.1111111111  |  | 0.325        | #DIV/0! |
| NFRSF     | 0             | 0             | 0.05555555556 |  | 0            | #DIV/0! |
| NFSF10    | 0.1904761905  | 0.1904761905  | 0.1111111111  |  | 1.529411765  | #DIV/0! |
| NFSF12    | 0             | 0             | 0.05555555556 |  | 0            | #DIV/0! |
| NFSF12-TN | 0             | 0             | 0.05555555556 |  | 0            | #DIV/0! |
| NFSF13    | 0             | 0             | 0.05555555556 |  | 0            | #DIV/0! |
| NFSF14    | 0.1428571429  | 0.1428571429  | 0.05555555556 |  | 2.333333333  | #DIV/0! |
| NFSF15    | 0.04761904762 | 0.04761904762 | 0.05555555556 |  | 0.7          | #DIV/0! |
| NFSF18    | 0.1428571429  | 0.1428571429  | 0             |  | inf          | #DIV/0! |
| NFSF4     | 0.1428571429  | 0.1428571429  | 0             |  | inf          | #DIV/0! |
| NFSF8     | 0.04761904762 | 0.04761904762 | 0.05555555556 |  | 0.7          | #DIV/0! |
| NFSF9     | 0.1428571429  | 0.1428571429  | 0.05555555556 |  | 2.333333333  | #DIV/0! |
| TNIK      | 0.1904761905  | 0.1904761905  | 0.05555555556 |  | 3.294117647  | #DIV/0! |
| TNIP2     | 0.04761904762 | 0.04761904762 | 0             |  | inf          | #DIV/0! |
| TNIP3     | 0             | 0             | 0.05555555556 |  | 0            | #DIV/0! |
| TNK1      | 0             | 0             | 0.05555555556 |  | 0            | #DIV/0! |
| TNK2      | 0.1428571429  | 0.1428571429  | 0.05555555556 |  | 2.333333333  | #DIV/0! |
| NK2-AS    | 0.1428571429  | 0.1428571429  | 0.05555555556 |  | 2.333333333  | #DIV/0! |
| TNKS      | 0.09523809524 | 0.09523809524 | 0.1111111111  |  | 0.6842105263 | #DIV/0! |
| TNKS2     | 0.1428571429  | 0.1428571429  | 0.1111111111  |  | 1.083333333  | #DIV/0! |
| NKS2-AS   | 0.1428571429  | 0.1428571429  | 0.1111111111  |  | 1.083333333  | #DIV/0! |
| TNN       | 0.1428571429  | 0.1428571429  | 0             |  | inf          | #DIV/0! |
| TNNC1     | 0.04761904762 | 0.04761904762 | 0             |  | inf          | #DIV/0! |
| TNNC2     | 0.1428571429  | 0.1428571429  | 0.1666666667  |  | 0.6666666667 | #DIV/0! |
| TNNI1     | 0.1428571429  | 0.1428571429  | 0             |  | inf          | #DIV/0! |
| TNNI2     | 0.04761904762 | 0.04761904762 | 0             |  | inf          | #DIV/0! |
| TNNI3     | 0.09523809524 | 0.09523809524 | 0.05555555556 |  | 1.473684211  | #DIV/0! |
| TNNI3K    | 0.04761904762 | 0.04761904762 | 0.05555555556 |  | 0.7          | #DIV/0! |
| TNNT1     | 0.09523809524 | 0.09523809524 | 0.05555555556 |  | 1.473684211  | #DIV/0! |
| TNNT2     | 0.1428571429  | 0.1428571429  | 0             |  | inf          | #DIV/0! |
| TNNT3     | 0.04761904762 | 0.04761904762 | 0             |  | inf          | #DIV/0! |
| TNP1      | 0             | 0             | 0.1111111111  |  | 0            | #DIV/0! |
| TNP2      | 0.04761904762 | 0.04761904762 | 0             |  | inf          | #DIV/0! |
| TNPO1     | 0             | 0             | 0.05555555556 |  | 0            | #DIV/0! |
| TNPO2     | 0.1428571429  | 0.1428571429  | 0.1111111111  |  | 1.083333333  | #DIV/0! |
| TNPO3     | 0.04761904762 | 0.04761904762 | 0.05555555556 |  | 0.7          | #DIV/0! |
| TNR       | 0.1428571429  | 0.1428571429  | 0             |  | inf          | #DIV/0! |
| TNRC17    | 0             | 0             | 0.05555555556 |  | 0            | #DIV/0! |
| TNRC18    | 0.04761904762 | 0.04761904762 | 0.1666666667  |  | 0.2          | #DIV/0! |
| TNRC18P   | 0             | 0             | 0.05555555556 |  | 0            | #DIV/0! |



|         |               |               |               |  |              |         |
|---------|---------------|---------------|---------------|--|--------------|---------|
| TNRC6A  | 0.04761904762 | 0.04761904762 | 0             |  | inf          | #DIV/0! |
| TNRC6B  | 0             | 0             | 0.1111111111  |  | 0            | #DIV/0! |
| TNRC6C  | 0.04761904762 | 0.04761904762 | 0             |  | inf          | #DIV/0! |
| RC6C-A  | 0.04761904762 | 0.04761904762 | 0             |  | inf          | #DIV/0! |
| TNS1    | 0             | 0             | 0.1111111111  |  | 0            | #DIV/0! |
| TNS2    | 0.04761904762 | 0.04761904762 | 0.05555555556 |  | 0.7          | #DIV/0! |
| TNS3    | 0.04761904762 | 0.04761904762 | 0.2222222222  |  | 0.1375       | #DIV/0! |
| TNS4    | 0.09523809524 | 0.09523809524 | 0             |  | inf          | #DIV/0! |
| TNXA    | 0.04761904762 | 0.04761904762 | 0             |  | inf          | #DIV/0! |
| TNXB    | 0.04761904762 | 0.04761904762 | 0             |  | inf          | #DIV/0! |
| TOB1    | 0.04761904762 | 0.04761904762 | 0             |  | inf          | #DIV/0! |
| OBI-AS  | 0.04761904762 | 0.04761904762 | 0             |  | inf          | #DIV/0! |
| TOB2    | 0             | 0             | 0.1111111111  |  | 0            | #DIV/0! |
| TOE1    | 0.04761904762 | 0.04761904762 | 0.05555555556 |  | 0.7          | #DIV/0! |
| OGARAN  | 0.04761904762 | 0.04761904762 | 0             |  | inf          | #DIV/0! |
| OGARAN  | 0             | 0             | 0.05555555556 |  | 0            | #DIV/0! |
| TOLLIP  | 0.04761904762 | 0.04761904762 | 0             |  | inf          | #DIV/0! |
| OLLIP-A | 0.04761904762 | 0.04761904762 | 0             |  | inf          | #DIV/0! |
| TOM1    | 0             | 0             | 0.1111111111  |  | 0            | #DIV/0! |
| TOM1L1  | 0.09523809524 | 0.09523809524 | 0             |  | inf          | #DIV/0! |
| TOM1L2  | 0.04761904762 | 0.04761904762 | 0.1111111111  |  | 0.325        | #DIV/0! |
| TOMM2   | 0.1428571429  | 0.1428571429  | 0.05555555556 |  | 2.333333333  | #DIV/0! |
| OMM20   | 0.04761904762 | 0.04761904762 | 0             |  | inf          | #DIV/0! |
| OMM22   | 0.04761904762 | 0.04761904762 | 0.1111111111  |  | 0.325        | #DIV/0! |
| OMM3    | 0.1428571429  | 0.1428571429  | 0.1666666667  |  | 0.6666666667 | #DIV/0! |
| OMM40   | 0.09523809524 | 0.09523809524 | 0.1111111111  |  | 0.6842105263 | #DIV/0! |
| OMM40   | 0.1428571429  | 0.1428571429  | 0             |  | inf          | #DIV/0! |
| TOMM5   | 0.09523809524 | 0.09523809524 | 0.05555555556 |  | 1.473684211  | #DIV/0! |
| TOMM6   | 0.04761904762 | 0.04761904762 | 0.05555555556 |  | 0.7          | #DIV/0! |
| TOMM7   | 0.04761904762 | 0.04761904762 | 0.1666666667  |  | 0.2          | #DIV/0! |
| OMM70   | 0.09523809524 | 0.09523809524 | 0.05555555556 |  | 1.473684211  | #DIV/0! |
| TONSL   | 0.04761904762 | 0.04761904762 | 0.1666666667  |  | 0.2          | #DIV/0! |
| ONSL-A  | 0.04761904762 | 0.04761904762 | 0.1666666667  |  | 0.2          | #DIV/0! |
| TOP1    | 0.1428571429  | 0.1428571429  | 0.1666666667  |  | 0.6666666667 | #DIV/0! |
| TOP1M1  | 0.04761904762 | 0.04761904762 | 0.05555555556 |  | 0.7          | #DIV/0! |
| TOP1P1  | 0.1428571429  | 0.1428571429  | 0.05555555556 |  | 2.333333333  | #DIV/0! |
| TOP1P2  | 0.04761904762 | 0.04761904762 | 0.05555555556 |  | 0.7          | #DIV/0! |
| TOP2A   | 0.09523809524 | 0.09523809524 | 0             |  | inf          | #DIV/0! |
| TOP2B   | 0.04761904762 | 0.04761904762 | 0             |  | inf          | #DIV/0! |
| TOP3A   | 0.04761904762 | 0.04761904762 | 0.1111111111  |  | 0.325        | #DIV/0! |
| TOP3B   | 0.04761904762 | 0.04761904762 | 0.05555555556 |  | 0.7          | #DIV/0! |
| TOPAZ1  | 0.04761904762 | 0.04761904762 | 0             |  | inf          | #DIV/0! |
| TOPBP1  | 0.1428571429  | 0.1428571429  | 0.05555555556 |  | 2.333333333  | #DIV/0! |
| TOPORS  | 0.09523809524 | 0.09523809524 | 0.05555555556 |  | 1.473684211  | #DIV/0! |
| TOR1A   | 0.09523809524 | 0.09523809524 | 0.05555555556 |  | 1.473684211  | #DIV/0! |
| OR1AIP  | 0.1428571429  | 0.1428571429  | 0             |  | inf          | #DIV/0! |
| OR1AIP  | 0.1428571429  | 0.1428571429  | 0             |  | inf          | #DIV/0! |
| TOR1B   | 0.09523809524 | 0.09523809524 | 0.05555555556 |  | 1.473684211  | #DIV/0! |
| TOR2A   | 0.09523809524 | 0.09523809524 | 0.05555555556 |  | 1.473684211  | #DIV/0! |
| TOR3A   | 0.1428571429  | 0.1428571429  | 0             |  | inf          | #DIV/0! |
| TOR4A   | 0.1428571429  | 0.1428571429  | 0.05555555556 |  | 2.333333333  | #DIV/0! |

|                 |               |               |              |  |              |         |
|-----------------|---------------|---------------|--------------|--|--------------|---------|
| <b>TOX</b>      | 0.1428571429  | 0.1428571429  | 0.1666666667 |  | 0.6666666667 | #DIV/0! |
| <b>TOX2</b>     | 0.1428571429  | 0.1428571429  | 0.1666666667 |  | 0.6666666667 | #DIV/0! |
| <b>TOX3</b>     | 0.04761904762 | 0.04761904762 | 0            |  | inf          | #DIV/0! |
| <b>TP53</b>     | 0             | 0             | 0.0555555556 |  | 0            | #DIV/0! |
| <b>TP53BP2</b>  | 0.1428571429  | 0.1428571429  | 0.0555555556 |  | 2.333333333  | #DIV/0! |
| <b>TP53I13</b>  | 0             | 0             | 0.0555555556 |  | 0            | #DIV/0! |
| <b>TP53INP</b>  | 0.1904761905  | 0.1904761905  | 0.1111111111 |  | 1.529411765  | #DIV/0! |
| <b>TP53INP</b>  | 0.09523809524 | 0.09523809524 | 0.1111111111 |  | 0.6842105263 | #DIV/0! |
| <b>TP53RK</b>   | 0.1428571429  | 0.1428571429  | 0.1666666667 |  | 0.6666666667 | #DIV/0! |
| <b>TP53TG</b>   | 0.09523809524 | 0.09523809524 | 0.0555555556 |  | 1.473684211  | #DIV/0! |
| <b>TP53TG3</b>  | 0.1428571429  | 0.1428571429  | 0            |  | inf          | #DIV/0! |
| <b>P53TG3</b>   | 0.1428571429  | 0.1428571429  | 0            |  | inf          | #DIV/0! |
| <b>P53TG3</b>   | 0.1428571429  | 0.1428571429  | 0            |  | inf          | #DIV/0! |
| <b>P53TG3</b>   | 0.1428571429  | 0.1428571429  | 0            |  | inf          | #DIV/0! |
| <b>P53TG3</b>   | 0.1428571429  | 0.1428571429  | 0            |  | inf          | #DIV/0! |
| <b>P53TG3</b>   | 0.1428571429  | 0.1428571429  | 0            |  | inf          | #DIV/0! |
| <b>P53TG3</b>   | 0.1428571429  | 0.1428571429  | 0            |  | inf          | #DIV/0! |
| <b>P53TG3I</b>  | 0.04761904762 | 0.04761904762 | 0            |  | inf          | #DIV/0! |
| <b>TP53TG5</b>  | 0.1428571429  | 0.1428571429  | 0.1666666667 |  | 0.6666666667 | #DIV/0! |
| <b>TP63</b>     | 0.09523809524 | 0.09523809524 | 0.1111111111 |  | 0.6842105263 | #DIV/0! |
| <b>TP73</b>     | 0             | 0             | 0.0555555556 |  | 0            | #DIV/0! |
| <b>P73-AS</b>   | 0             | 0             | 0.0555555556 |  | 0            | #DIV/0! |
| <b>TPCN1</b>    | 0             | 0             | 0.0555555556 |  | 0            | #DIV/0! |
| <b>TPD52</b>    | 0.1428571429  | 0.1428571429  | 0.1111111111 |  | 1.083333333  | #DIV/0! |
| <b>TPD52L2</b>  | 0.1428571429  | 0.1428571429  | 0.2222222222 |  | 0.4583333333 | #DIV/0! |
| <b>TPD52L3</b>  | 0.04761904762 | 0.04761904762 | 0.0555555556 |  | 0.7          | #DIV/0! |
| <b>TPGS1</b>    | 0.09523809524 | 0.09523809524 | 0.1111111111 |  | 0.6842105263 | #DIV/0! |
| <b>TPGS2</b>    | 0.04761904762 | 0.04761904762 | 0            |  | inf          | #DIV/0! |
| <b>TPH2</b>     | 0.04761904762 | 0.04761904762 | 0.0555555556 |  | 0.7          | #DIV/0! |
| <b>TPH1</b>     | 0.04761904762 | 0.04761904762 | 0.1111111111 |  | 0.325        | #DIV/0! |
| <b>TPH1P2</b>   | 0.04761904762 | 0.04761904762 | 0.0555555556 |  | 0.7          | #DIV/0! |
| <b>TPK1</b>     | 0.09523809524 | 0.09523809524 | 0.0555555556 |  | 1.473684211  | #DIV/0! |
| <b>TPM1</b>     | 0.04761904762 | 0.04761904762 | 0.0555555556 |  | 0.7          | #DIV/0! |
| <b>TPM1-AS</b>  | 0.04761904762 | 0.04761904762 | 0.0555555556 |  | 0.7          | #DIV/0! |
| <b>TPM2</b>     | 0.09523809524 | 0.09523809524 | 0.0555555556 |  | 1.473684211  | #DIV/0! |
| <b>TPM3</b>     | 0.1904761905  | 0.1904761905  | 0.0555555556 |  | 3.294117647  | #DIV/0! |
| <b>TPM3P9</b>   | 0.09523809524 | 0.09523809524 | 0.0555555556 |  | 1.473684211  | #DIV/0! |
| <b>TPM4</b>     | 0.1428571429  | 0.1428571429  | 0.1111111111 |  | 1.083333333  | #DIV/0! |
| <b>TPO</b>      | 0             | 0             | 0.0555555556 |  | 0            | #DIV/0! |
| <b>TPP1</b>     | 0.04761904762 | 0.04761904762 | 0            |  | inf          | #DIV/0! |
| <b>TPPP</b>     | 0             | 0             | 0.0555555556 |  | 0            | #DIV/0! |
| <b>TPPP3</b>    | 0.1428571429  | 0.1428571429  | 0.0555555556 |  | 2.333333333  | #DIV/0! |
| <b>TPR</b>      | 0.1428571429  | 0.1428571429  | 0.0555555556 |  | 2.333333333  | #DIV/0! |
| <b>TPRA1</b>    | 0.09523809524 | 0.09523809524 | 0.0555555556 |  | 1.473684211  | #DIV/0! |
| <b>TPRG1</b>    | 0.09523809524 | 0.09523809524 | 0.1111111111 |  | 0.6842105263 | #DIV/0! |
| <b>TPRG1-AS</b> | 0.09523809524 | 0.09523809524 | 0.1111111111 |  | 0.6842105263 | #DIV/0! |
| <b>TPRG1-AS</b> | 0.09523809524 | 0.09523809524 | 0.1111111111 |  | 0.6842105263 | #DIV/0! |
| <b>TPRG1L</b>   | 0             | 0             | 0.0555555556 |  | 0            | #DIV/0! |
| <b>TPRKB</b>    | 0             | 0             | 0.0555555556 |  | 0            | #DIV/0! |
| <b>TPRN</b>     | 0.1428571429  | 0.1428571429  | 0.0555555556 |  | 2.333333333  | #DIV/0! |
| <b>TPRX1</b>    | 0.09523809524 | 0.09523809524 | 0.1111111111 |  | 0.6842105263 | #DIV/0! |
| <b>TPRXL</b>    | 0.04761904762 | 0.04761904762 | 0            |  | inf          | #DIV/0! |

|         |               |               |               |  |              |         |
|---------|---------------|---------------|---------------|--|--------------|---------|
| TPSAB1  | 0.04761904762 | 0.04761904762 | 0.2222222222  |  | 0.1375       | #DIV/0! |
| TPSB2   | 0.04761904762 | 0.04761904762 | 0.2222222222  |  | 0.1375       | #DIV/0! |
| TPSD1   | 0.04761904762 | 0.04761904762 | 0.2222222222  |  | 0.1375       | #DIV/0! |
| TPSG1   | 0.04761904762 | 0.04761904762 | 0.2222222222  |  | 0.1375       | #DIV/0! |
| TPST1   | 0.04761904762 | 0.04761904762 | 0.1111111111  |  | 0.325        | #DIV/0! |
| TPST2   | 0.04761904762 | 0.04761904762 | 0.05555555556 |  | 0.7          | #DIV/0! |
| TPTE    | 0.04761904762 | 0.04761904762 | 0             |  | inf          | #DIV/0! |
| TPTE2   | 0.04761904762 | 0.04761904762 | 0             |  | inf          | #DIV/0! |
| TPTEP1  | 0.04761904762 | 0.04761904762 | 0             |  | inf          | #DIV/0! |
| TPTEP2  | 0.04761904762 | 0.04761904762 | 0.1111111111  |  | 0.325        | #DIV/0! |
| EP2-CSN | 0.04761904762 | 0.04761904762 | 0.1111111111  |  | 0.325        | #DIV/0! |
| TPX2    | 0.09523809524 | 0.09523809524 | 0.1111111111  |  | 0.6842105263 | #DIV/0! |
| TRA2A   | 0.04761904762 | 0.04761904762 | 0.1666666667  |  | 0.2          | #DIV/0! |
| TRA2B   | 0.09523809524 | 0.09523809524 | 0.05555555556 |  | 1.473684211  | #DIV/0! |
| TRABD   | 0             | 0             | 0.1111111111  |  | 0            | #DIV/0! |
| RABD2   | 0             | 0             | 0.05555555556 |  | 0            | #DIV/0! |
| RABD2   | 0             | 0             | 0.05555555556 |  | 0            | #DIV/0! |
| TRADD   | 0.1428571429  | 0.1428571429  | 0.05555555556 |  | 2.333333333  | #DIV/0! |
| TRAF1   | 0.09523809524 | 0.09523809524 | 0.05555555556 |  | 1.473684211  | #DIV/0! |
| TRAF2   | 0.1428571429  | 0.1428571429  | 0.05555555556 |  | 2.333333333  | #DIV/0! |
| RAF3IP  | 0             | 0             | 0.05555555556 |  | 0            | #DIV/0! |
| RAF3IP  | 0             | 0             | 0             |  |              | #DIV/0! |
| RAF3IP2 | 0             | 0             | 0             |  |              | #DIV/0! |
| RAF3IP  | 0.1428571429  | 0.1428571429  | 0             |  | inf          | #DIV/0! |
| TRAF4   | 0.04761904762 | 0.04761904762 | 0.05555555556 |  | 0.7          | #DIV/0! |
| TRAF5   | 0.1428571429  | 0.1428571429  | 0             |  | inf          | #DIV/0! |
| TRAF7   | 0.09523809524 | 0.09523809524 | 0.2222222222  |  | 0.2894736842 | #DIV/0! |
| TRAFD1  | 0             | 0             | 0.1111111111  |  | 0            | #DIV/0! |
| TRAIP   | 0.09523809524 | 0.09523809524 | 0             |  | inf          | #DIV/0! |
| TRAK1   | 0.04761904762 | 0.04761904762 | 0             |  | inf          | #DIV/0! |
| TRAK2   | 0             | 0             | 0.05555555556 |  | 0            | #DIV/0! |
| TRAM1   | 0.1904761905  | 0.1904761905  | 0.1666666667  |  | 0.9411764706 | #DIV/0! |
| RAMIL   | 0             | 0             | 0.05555555556 |  | 0            | #DIV/0! |
| TRAM2   | 0.04761904762 | 0.04761904762 | 0             |  | inf          | #DIV/0! |
| RAM2-A0 | 0.04761904762 | 0.04761904762 | 0             |  | inf          | #DIV/0! |
| TRANK1  | 0.04761904762 | 0.04761904762 | 0             |  | inf          | #DIV/0! |
| TRAP1   | 0.04761904762 | 0.04761904762 | 0.1111111111  |  | 0.325        | #DIV/0! |
| RAPPC   | 0             | 0             | 0.05555555556 |  | 0            | #DIV/0! |
| RAPPC0  | 0.04761904762 | 0.04761904762 | 0.1111111111  |  | 0.325        | #DIV/0! |
| RAPPC1  | 0             | 0             | 0.05555555556 |  | 0            | #DIV/0! |
| RAPPC1  | 0             | 0             | 0.05555555556 |  | 0            | #DIV/0! |
| RAPPC1  | 0.04761904762 | 0.04761904762 | 0             |  | inf          | #DIV/0! |
| RAPPC2  | 0.1428571429  | 0.1428571429  | 0.05555555556 |  | 2.333333333  | #DIV/0! |
| RAPPC2  | 0.1904761905  | 0.1904761905  | 0             |  | inf          | #DIV/0! |
| RAPPC   | 0.04761904762 | 0.04761904762 | 0.05555555556 |  | 0.7          | #DIV/0! |
| RAPPC   | 0.1428571429  | 0.1428571429  | 0.05555555556 |  | 2.333333333  | #DIV/0! |
| RAPPC6  | 0.09523809524 | 0.09523809524 | 0.1111111111  |  | 0.6842105263 | #DIV/0! |
| RAPPC6  | 0.04761904762 | 0.04761904762 | 0             |  | inf          | #DIV/0! |
| RAPPC   | 0.09523809524 | 0.09523809524 | 0             |  | inf          | #DIV/0! |
| RAPPC   | 0.04761904762 | 0.04761904762 | 0.1666666667  |  | 0.2          | #DIV/0! |
| TRARG1  | 0             | 0             | 0.1111111111  |  | 0            | #DIV/0! |

|        |               |               |               |  |              |         |
|--------|---------------|---------------|---------------|--|--------------|---------|
| TRAT1  | 0.09523809524 | 0.09523809524 | 0.05555555556 |  | 1.473684211  | #DIV/0! |
| RDMT   | 0.09523809524 | 0.09523809524 | 0.11111111111 |  | 0.6842105263 | #DIV/0! |
| TREM1  | 0             | 0             | 0.05555555556 |  | 0            | #DIV/0! |
| TREM2  | 0             | 0             | 0.05555555556 |  | 0            | #DIV/0! |
| TREML1 | 0             | 0             | 0.05555555556 |  | 0            | #DIV/0! |
| TREML2 | 0             | 0             | 0.05555555556 |  | 0            | #DIV/0! |
| REML3  | 0             | 0             | 0.05555555556 |  | 0            | #DIV/0! |
| TREML4 | 0             | 0             | 0.05555555556 |  | 0            | #DIV/0! |
| REML5  | 0             | 0             | 0.05555555556 |  | 0            | #DIV/0! |
| TRERF1 | 0.04761904762 | 0.04761904762 | 0.05555555556 |  | 0.7          | #DIV/0! |
| RERNA  | 0.09523809524 | 0.09523809524 | 0.16666666667 |  | 0.4210526316 | #DIV/0! |
| TREX1  | 0.09523809524 | 0.09523809524 | 0             |  | inf          | #DIV/0! |
| RG-AS  | 0.04761904762 | 0.04761904762 | 0.22222222222 |  | 0.1375       | #DIV/0! |
| TRH    | 0.09523809524 | 0.09523809524 | 0.05555555556 |  | 1.473684211  | #DIV/0! |
| TRHDE  | 0.04761904762 | 0.04761904762 | 0.05555555556 |  | 0.7          | #DIV/0! |
| HDE-A  | 0.04761904762 | 0.04761904762 | 0.05555555556 |  | 0.7          | #DIV/0! |
| TRHR   | 0.1904761905  | 0.1904761905  | 0.11111111111 |  | 1.529411765  | #DIV/0! |
| TRIAP1 | 0             | 0             | 0.11111111111 |  | 0            | #DIV/0! |
| TRIB1  | 0.1428571429  | 0.1428571429  | 0.11111111111 |  | 1.083333333  | #DIV/0! |
| TRIB2  | 0             | 0             | 0.05555555556 |  | 0            | #DIV/0! |
| TRIB3  | 0.1904761905  | 0.1904761905  | 0.05555555556 |  | 3.294117647  | #DIV/0! |
| TRIL   | 0.04761904762 | 0.04761904762 | 0.22222222222 |  | 0.1375       | #DIV/0! |
| TRIM11 | 0.1428571429  | 0.1428571429  | 0             |  | inf          | #DIV/0! |
| TRIM14 | 0.04761904762 | 0.04761904762 | 0             |  | inf          | #DIV/0! |
| TRIM16 | 0.04761904762 | 0.04761904762 | 0.05555555556 |  | 0.7          | #DIV/0! |
| TRIM16 | 0.04761904762 | 0.04761904762 | 0.11111111111 |  | 0.325        | #DIV/0! |
| TRIM17 | 0.1428571429  | 0.1428571429  | 0             |  | inf          | #DIV/0! |
| TRIM2  | 0             | 0             | 0.05555555556 |  | 0            | #DIV/0! |
| TRIM21 | 0.04761904762 | 0.04761904762 | 0             |  | inf          | #DIV/0! |
| TRIM22 | 0.04761904762 | 0.04761904762 | 0             |  | inf          | #DIV/0! |
| TRIM23 | 0.04761904762 | 0.04761904762 | 0             |  | inf          | #DIV/0! |
| TRIM24 | 0.04761904762 | 0.04761904762 | 0.05555555556 |  | 0.7          | #DIV/0! |
| TRIM25 | 0.09523809524 | 0.09523809524 | 0             |  | inf          | #DIV/0! |
| TRIM28 | 0.1428571429  | 0.1428571429  | 0.05555555556 |  | 2.333333333  | #DIV/0! |
| TRIM3  | 0.04761904762 | 0.04761904762 | 0             |  | inf          | #DIV/0! |
| TRIM32 | 0.04761904762 | 0.04761904762 | 0.05555555556 |  | 0.7          | #DIV/0! |
| TRIM33 | 0.04761904762 | 0.04761904762 | 0.05555555556 |  | 0.7          | #DIV/0! |
| TRIM34 | 0.04761904762 | 0.04761904762 | 0             |  | inf          | #DIV/0! |
| TRIM35 | 0.04761904762 | 0.04761904762 | 0.11111111111 |  | 0.325        | #DIV/0! |
| TRIM36 | 0.04761904762 | 0.04761904762 | 0             |  | inf          | #DIV/0! |
| TRIM37 | 0.1428571429  | 0.1428571429  | 0             |  | inf          | #DIV/0! |
| TRIM38 | 0             | 0             | 0.05555555556 |  | 0            | #DIV/0! |
| TRIM4  | 0.04761904762 | 0.04761904762 | 0.05555555556 |  | 0.7          | #DIV/0! |
| TRIM41 | 0.09523809524 | 0.09523809524 | 0.05555555556 |  | 1.473684211  | #DIV/0! |
| TRIM42 | 0.1428571429  | 0.1428571429  | 0.05555555556 |  | 2.333333333  | #DIV/0! |
| TRIM43 | 0             | 0             | 0.11111111111 |  | 0            | #DIV/0! |
| TRIM43 | 0             | 0             | 0.11111111111 |  | 0            | #DIV/0! |
| TRIM45 | 0.04761904762 | 0.04761904762 | 0.05555555556 |  | 0.7          | #DIV/0! |
| TRIM46 | 0.1904761905  | 0.1904761905  | 0.11111111111 |  | 1.529411765  | #DIV/0! |
| TRIM47 | 0.04761904762 | 0.04761904762 | 0             |  | inf          | #DIV/0! |
| TRIM48 | 0.09523809524 | 0.09523809524 | 0             |  | inf          | #DIV/0! |

|        |               |               |               |  |               |         |
|--------|---------------|---------------|---------------|--|---------------|---------|
| TRIM5  | 0.04761904762 | 0.04761904762 | 0             |  | inf           | #DIV/0! |
| TRIM50 | 0.1428571429  | 0.1428571429  | 0.1111111111  |  | 1.083333333   | #DIV/0! |
| RIM51H | 0.09523809524 | 0.09523809524 | 0             |  | inf           | #DIV/0! |
| TRIM52 | 0.09523809524 | 0.09523809524 | 0.05555555556 |  | 1.473684211   | #DIV/0! |
| IM52-A | 0.09523809524 | 0.09523809524 | 0.05555555556 |  | 1.473684211   | #DIV/0! |
| TRIM55 | 0.1428571429  | 0.1428571429  | 0.16666666667 |  | 0.66666666667 | #DIV/0! |
| TRIM56 | 0.04761904762 | 0.04761904762 | 0.05555555556 |  | 0.7           | #DIV/0! |
| TRIM58 | 0.1428571429  | 0.1428571429  | 0             |  | inf           | #DIV/0! |
| TRIM59 | 0.1428571429  | 0.1428571429  | 0.05555555556 |  | 2.333333333   | #DIV/0! |
| M59-IF | 0.1428571429  | 0.1428571429  | 0.05555555556 |  | 2.333333333   | #DIV/0! |
| TRIM6  | 0.04761904762 | 0.04761904762 | 0             |  | inf           | #DIV/0! |
| M6-TRI | 0.04761904762 | 0.04761904762 | 0             |  | inf           | #DIV/0! |
| TRIM60 | 0.04761904762 | 0.04761904762 | 0.05555555556 |  | 0.7           | #DIV/0! |
| TRIM61 | 0.04761904762 | 0.04761904762 | 0.05555555556 |  | 0.7           | #DIV/0! |
| TRIM62 | 0.04761904762 | 0.04761904762 | 0.05555555556 |  | 0.7           | #DIV/0! |
| TRIM63 | 0.04761904762 | 0.04761904762 | 0.1111111111  |  | 0.325         | #DIV/0! |
| TRIM65 | 0.04761904762 | 0.04761904762 | 0             |  | inf           | #DIV/0! |
| TRIM67 | 0.1428571429  | 0.1428571429  | 0             |  | inf           | #DIV/0! |
| TRIM68 | 0.04761904762 | 0.04761904762 | 0             |  | inf           | #DIV/0! |
| TRIM7  | 0.09523809524 | 0.09523809524 | 0.05555555556 |  | 1.473684211   | #DIV/0! |
| TRIM71 | 0.09523809524 | 0.09523809524 | 0             |  | inf           | #DIV/0! |
| TRIM72 | 0.04761904762 | 0.04761904762 | 0             |  | inf           | #DIV/0! |
| TRIM73 | 0.1428571429  | 0.1428571429  | 0.16666666667 |  | 0.66666666667 | #DIV/0! |
| TRIM74 | 0.1428571429  | 0.1428571429  | 0.1111111111  |  | 1.083333333   | #DIV/0! |
| TRIM8  | 0.1428571429  | 0.1428571429  | 0.05555555556 |  | 2.333333333   | #DIV/0! |
| TRIM9  | 0.04761904762 | 0.04761904762 | 0             |  | inf           | #DIV/0! |
| TRIML1 | 0             | 0             | 0.05555555556 |  | 0             | #DIV/0! |
| TRIML2 | 0             | 0             | 0.05555555556 |  | 0             | #DIV/0! |
| TRIO   | 0.04761904762 | 0.04761904762 | 0.05555555556 |  | 0.7           | #DIV/0! |
| TRIOBP | 0             | 0             | 0.1111111111  |  | 0             | #DIV/0! |
| TRIP10 | 0.1428571429  | 0.1428571429  | 0.05555555556 |  | 2.333333333   | #DIV/0! |
| TRIP12 | 0             | 0             | 0.05555555556 |  | 0             | #DIV/0! |
| TRIP13 | 0             | 0             | 0.05555555556 |  | 0             | #DIV/0! |
| TRIP4  | 0.04761904762 | 0.04761904762 | 0.05555555556 |  | 0.7           | #DIV/0! |
| TRIP6  | 0.04761904762 | 0.04761904762 | 0.05555555556 |  | 0.7           | #DIV/0! |
| TRIQK  | 0.1904761905  | 0.1904761905  | 0.1111111111  |  | 1.529411765   | #DIV/0! |
| TRIR   | 0.1428571429  | 0.1428571429  | 0.1111111111  |  | 1.083333333   | #DIV/0! |
| TRIT1  | 0.04761904762 | 0.04761904762 | 0.05555555556 |  | 0.7           | #DIV/0! |
| TRMO   | 0.04761904762 | 0.04761904762 | 0             |  | inf           | #DIV/0! |
| TRMT1  | 0.1428571429  | 0.1428571429  | 0.1111111111  |  | 1.083333333   | #DIV/0! |
| RMT10  | 0             | 0             | 0.05555555556 |  | 0             | #DIV/0! |
| RMT100 | 0.09523809524 | 0.09523809524 | 0.05555555556 |  | 1.473684211   | #DIV/0! |
| RMT100 | 0.09523809524 | 0.09523809524 | 0.05555555556 |  | 1.473684211   | #DIV/0! |
| TRMT12 | 0.1428571429  | 0.1428571429  | 0.1111111111  |  | 1.083333333   | #DIV/0! |
| TRMT13 | 0.04761904762 | 0.04761904762 | 0.05555555556 |  | 0.7           | #DIV/0! |
| TRMT11 | 0.1428571429  | 0.1428571429  | 0.05555555556 |  | 2.333333333   | #DIV/0! |
| TRMT2  | 0.04761904762 | 0.04761904762 | 0.05555555556 |  | 0.7           | #DIV/0! |
| TRMT6  | 0.1904761905  | 0.1904761905  | 0.05555555556 |  | 3.294117647   | #DIV/0! |
| RMT61  | 0             | 0             | 0.05555555556 |  | 0             | #DIV/0! |
| TRMT9  | 0.09523809524 | 0.09523809524 | 0.1111111111  |  | 0.6842105263  | #DIV/0! |
| TRMU   | 0             | 0             | 0.1111111111  |  | 0             | #DIV/0! |

|        |               |               |               |  |              |         |
|--------|---------------|---------------|---------------|--|--------------|---------|
| RNAU1A | 0.04761904762 | 0.04761904762 | 0.1111111111  |  | 0.325        | #DIV/0! |
| TRNP1  | 0.04761904762 | 0.04761904762 | 0.1111111111  |  | 0.325        | #DIV/0! |
| TRNT1  | 0.04761904762 | 0.04761904762 | 0             |  | inf          | #DIV/0! |
| TROAP  | 0.04761904762 | 0.04761904762 | 0.05555555556 |  | 0.7          | #DIV/0! |
| TRPA1  | 0.1904761905  | 0.1904761905  | 0.1666666667  |  | 0.9411764706 | #DIV/0! |
| TRPC1  | 0.1904761905  | 0.1904761905  | 0.05555555556 |  | 3.294117647  | #DIV/0! |
| TRPC2  | 0.04761904762 | 0.04761904762 | 0             |  | inf          | #DIV/0! |
| TRPC3  | 0             | 0             | 0.05555555556 |  | 0            | #DIV/0! |
| RPC4A  | 0.09523809524 | 0.09523809524 | 0.1111111111  |  | 0.6842105263 | #DIV/0! |
| TRPC7  | 0.04761904762 | 0.04761904762 | 0             |  | inf          | #DIV/0! |
| RPC7-A | 0.04761904762 | 0.04761904762 | 0             |  | inf          | #DIV/0! |
| TRPM2  | 0.04761904762 | 0.04761904762 | 0.1111111111  |  | 0.325        | #DIV/0! |
| RPM2-A | 0.04761904762 | 0.04761904762 | 0.1111111111  |  | 0.325        | #DIV/0! |
| TRPM3  | 0             | 0             | 0.05555555556 |  | 0            | #DIV/0! |
| TRPM4  | 0.09523809524 | 0.09523809524 | 0.1111111111  |  | 0.6842105263 | #DIV/0! |
| TRPM5  | 0.04761904762 | 0.04761904762 | 0             |  | inf          | #DIV/0! |
| TRPM6  | 0             | 0             | 0.05555555556 |  | 0            | #DIV/0! |
| TRPM7  | 0.1428571429  | 0.1428571429  | 0.05555555556 |  | 2.333333333  | #DIV/0! |
| TRPM8  | 0             | 0             | 0.05555555556 |  | 0            | #DIV/0! |
| TRPS1  | 0.1904761905  | 0.1904761905  | 0.1666666667  |  | 0.9411764706 | #DIV/0! |
| TRPV1  | 0             | 0             | 0.1111111111  |  | 0            | #DIV/0! |
| TRPV2  | 0.04761904762 | 0.04761904762 | 0.05555555556 |  | 0.7          | #DIV/0! |
| TRPV3  | 0             | 0             | 0.1111111111  |  | 0            | #DIV/0! |
| TRPV4  | 0             | 0             | 0.05555555556 |  | 0            | #DIV/0! |
| TRPV5  | 0.04761904762 | 0.04761904762 | 0.05555555556 |  | 0.7          | #DIV/0! |
| TRPV6  | 0.04761904762 | 0.04761904762 | 0.05555555556 |  | 0.7          | #DIV/0! |
| TRRAP  | 0.04761904762 | 0.04761904762 | 0.05555555556 |  | 0.7          | #DIV/0! |
| TRUB1  | 0.1904761905  | 0.1904761905  | 0.05555555556 |  | 3.294117647  | #DIV/0! |
| TRUB2  | 0.09523809524 | 0.09523809524 | 0.05555555556 |  | 1.473684211  | #DIV/0! |
| TRY2P  | 0.04761904762 | 0.04761904762 | 0.05555555556 |  | 0.7          | #DIV/0! |
| TSACC  | 0.1428571429  | 0.1428571429  | 0.1111111111  |  | 1.083333333  | #DIV/0! |
| TSBP1  | 0.04761904762 | 0.04761904762 | 0             |  | inf          | #DIV/0! |
| SBP1-A | 0.04761904762 | 0.04761904762 | 0             |  | inf          | #DIV/0! |
| TSC1   | 0.04761904762 | 0.04761904762 | 0             |  | inf          | #DIV/0! |
| TSC2   | 0.09523809524 | 0.09523809524 | 0.2222222222  |  | 0.2894736842 | #DIV/0! |
| TSC2D2 | 0.1904761905  | 0.1904761905  | 0.1111111111  |  | 1.529411765  | #DIV/0! |
| TSC2D4 | 0.04761904762 | 0.04761904762 | 0.05555555556 |  | 0.7          | #DIV/0! |
| TSEN15 | 0.1428571429  | 0.1428571429  | 0             |  | inf          | #DIV/0! |
| TSEN2  | 0.09523809524 | 0.09523809524 | 0             |  | inf          | #DIV/0! |
| TSEN34 | 0.09523809524 | 0.09523809524 | 0.05555555556 |  | 1.473684211  | #DIV/0! |
| TSFM   | 0.1428571429  | 0.1428571429  | 0.05555555556 |  | 2.333333333  | #DIV/0! |
| TSG1   | 0             | 0             | 0             |  |              | #DIV/0! |
| TSGA10 | 0             | 0             | 0.05555555556 |  | 0            | #DIV/0! |
| TSGA13 | 0.04761904762 | 0.04761904762 | 0.05555555556 |  | 0.7          | #DIV/0! |
| TSHB   | 0.04761904762 | 0.04761904762 | 0.05555555556 |  | 0.7          | #DIV/0! |
| TSHZ1  | 0.09523809524 | 0.09523809524 | 0             |  | inf          | #DIV/0! |
| TSHZ2  | 0.09523809524 | 0.09523809524 | 0.1111111111  |  | 0.6842105263 | #DIV/0! |
| TSHZ3  | 0.04761904762 | 0.04761904762 | 0.05555555556 |  | 0.7          | #DIV/0! |
| TSKS   | 0.09523809524 | 0.09523809524 | 0.1111111111  |  | 0.6842105263 | #DIV/0! |
| TSL    | 0.04761904762 | 0.04761904762 | 0.2222222222  |  | 0.1375       | #DIV/0! |
| TSLP   | 0.04761904762 | 0.04761904762 | 0             |  | inf          | #DIV/0! |

|          |               |               |               |  |              |         |
|----------|---------------|---------------|---------------|--|--------------|---------|
| TSN      | 0             | 0             | 0.05555555556 |  | 0            | #DIV/0! |
| SNARE    | 0.04761904762 | 0.04761904762 | 0.16666666667 |  | 0.2          | #DIV/0! |
| TSNAX    | 0.1428571429  | 0.1428571429  | 0             |  | inf          | #DIV/0! |
| NAX-DIS  | 0.1428571429  | 0.1428571429  | 0             |  | inf          | #DIV/0! |
| SNAXIP   | 0.1428571429  | 0.1428571429  | 0.05555555556 |  | 2.333333333  | #DIV/0! |
| TSPAN10  | 0.04761904762 | 0.04761904762 | 0.05555555556 |  | 0.7          | #DIV/0! |
| TSPAN10  | 0.04761904762 | 0.04761904762 | 0             |  | inf          | #DIV/0! |
| TSPAN10  | 0.04761904762 | 0.04761904762 | 0.05555555556 |  | 0.7          | #DIV/0! |
| TSPAN10  | 0.04761904762 | 0.04761904762 | 0.05555555556 |  | 0.7          | #DIV/0! |
| TSPAN10  | 0.04761904762 | 0.04761904762 | 0.2222222222  |  | 0.1375       | #DIV/0! |
| TSPAN14  | 0.1428571429  | 0.1428571429  | 0             |  | inf          | #DIV/0! |
| TSPAN10  | 0.09523809524 | 0.09523809524 | 0             |  | inf          | #DIV/0! |
| TSPAN16  | 0.1428571429  | 0.1428571429  | 0.1111111111  |  | 1.083333333  | #DIV/0! |
| TSPAN10  | 0.09523809524 | 0.09523809524 | 0.05555555556 |  | 1.473684211  | #DIV/0! |
| TSPAN10  | 0.04761904762 | 0.04761904762 | 0.05555555556 |  | 0.7          | #DIV/0! |
| TSPAN20  | 0.04761904762 | 0.04761904762 | 0.05555555556 |  | 0.7          | #DIV/0! |
| TSPAN30  | 0.04761904762 | 0.04761904762 | 0.05555555556 |  | 0.7          | #DIV/0! |
| TSPAN30  | 0.1428571429  | 0.1428571429  | 0.05555555556 |  | 2.333333333  | #DIV/0! |
| TSPAN30  | 0.04761904762 | 0.04761904762 | 0             |  | inf          | #DIV/0! |
| TSPAN30  | 0.04761904762 | 0.04761904762 | 0.05555555556 |  | 0.7          | #DIV/0! |
| TSPAN40  | 0.04761904762 | 0.04761904762 | 0             |  | inf          | #DIV/0! |
| TSPAN50  | 0             | 0             | 0.05555555556 |  | 0            | #DIV/0! |
| TSPAN80  | 0.09523809524 | 0.09523809524 | 0.1111111111  |  | 0.6842105263 | #DIV/0! |
| TSPAN90  | 0.04761904762 | 0.04761904762 | 0.16666666667 |  | 0.2          | #DIV/0! |
| TSPEAR0  | 0.04761904762 | 0.04761904762 | 0.1111111111  |  | 0.325        | #DIV/0! |
| PEAR-A0  | 0.04761904762 | 0.04761904762 | 0.1111111111  |  | 0.325        | #DIV/0! |
| PEAR-A0  | 0.04761904762 | 0.04761904762 | 0.1111111111  |  | 0.325        | #DIV/0! |
| TSPO     | 0             | 0             | 0.16666666667 |  | 0            | #DIV/0! |
| TSPO2    | 0             | 0             | 0.05555555556 |  | 0            | #DIV/0! |
| SPOAP0   | 0.09523809524 | 0.09523809524 | 0             |  | inf          | #DIV/0! |
| POAP1-A0 | 0.09523809524 | 0.09523809524 | 0             |  | inf          | #DIV/0! |
| TSPYL5   | 0.1904761905  | 0.1904761905  | 0.1111111111  |  | 1.529411765  | #DIV/0! |
| TSPYL60  | 0.04761904762 | 0.04761904762 | 0.05555555556 |  | 0.7          | #DIV/0! |
| TSR1     | 0             | 0             | 0.1111111111  |  | 0            | #DIV/0! |
| TSR3     | 0.04761904762 | 0.04761904762 | 0.2222222222  |  | 0.1375       | #DIV/0! |
| TSSC2    | 0.04761904762 | 0.04761904762 | 0             |  | inf          | #DIV/0! |
| TSSC4    | 0.04761904762 | 0.04761904762 | 0             |  | inf          | #DIV/0! |
| TSSK1B0  | 0.04761904762 | 0.04761904762 | 0             |  | inf          | #DIV/0! |
| TSSK2    | 0.04761904762 | 0.04761904762 | 0.05555555556 |  | 0.7          | #DIV/0! |
| TSSK3    | 0.04761904762 | 0.04761904762 | 0.1111111111  |  | 0.325        | #DIV/0! |
| TSSK6    | 0.1428571429  | 0.1428571429  | 0.1111111111  |  | 1.083333333  | #DIV/0! |
| TST      | 0             | 0             | 0.1111111111  |  | 0            | #DIV/0! |
| TSTA3    | 0.04761904762 | 0.04761904762 | 0.16666666667 |  | 0.2          | #DIV/0! |
| TSTD1    | 0.1428571429  | 0.1428571429  | 0             |  | inf          | #DIV/0! |
| TSTD2    | 0.04761904762 | 0.04761904762 | 0             |  | inf          | #DIV/0! |
| TTBK1    | 0.04761904762 | 0.04761904762 | 0.05555555556 |  | 0.7          | #DIV/0! |
| TTC1     | 0.04761904762 | 0.04761904762 | 0.05555555556 |  | 0.7          | #DIV/0! |
| TTC13    | 0.1428571429  | 0.1428571429  | 0             |  | inf          | #DIV/0! |
| TTC14    | 0.1904761905  | 0.1904761905  | 0.05555555556 |  | 3.294117647  | #DIV/0! |
| TTC16    | 0.09523809524 | 0.09523809524 | 0.05555555556 |  | 1.473684211  | #DIV/0! |
| TTC19    | 0.04761904762 | 0.04761904762 | 0.05555555556 |  | 0.7          | #DIV/0! |

|         |               |               |               |  |              |         |
|---------|---------------|---------------|---------------|--|--------------|---------|
| TTC21A  | 0.04761904762 | 0.04761904762 | 0             |  | inf          | #DIV/0! |
| TTC21B  | 0             | 0             | 0.05555555556 |  | 0            | #DIV/0! |
| C21B-A  | 0             | 0             | 0.05555555556 |  | 0            | #DIV/0! |
| TTC22   | 0.04761904762 | 0.04761904762 | 0.05555555556 |  | 0.7          | #DIV/0! |
| TTC23   | 0.04761904762 | 0.04761904762 | 0.05555555556 |  | 0.7          | #DIV/0! |
| TTC23L  | 0.04761904762 | 0.04761904762 | 0.05555555556 |  | 0.7          | #DIV/0! |
| TTC24   | 0.1428571429  | 0.1428571429  | 0.1111111111  |  | 1.083333333  | #DIV/0! |
| TTC25   | 0.09523809524 | 0.09523809524 | 0             |  | inf          | #DIV/0! |
| TTC26   | 0.04761904762 | 0.04761904762 | 0.05555555556 |  | 0.7          | #DIV/0! |
| TTC27   | 0.1428571429  | 0.1428571429  | 0             |  | inf          | #DIV/0! |
| TTC28   | 0.04761904762 | 0.04761904762 | 0.1111111111  |  | 0.325        | #DIV/0! |
| TC28-AS | 0.04761904762 | 0.04761904762 | 0.1111111111  |  | 0.325        | #DIV/0! |
| TTC29   | 0             | 0             | 0.05555555556 |  | 0            | #DIV/0! |
| TTC3    | 0.04761904762 | 0.04761904762 | 0.1666666667  |  | 0.2          | #DIV/0! |
| TC3-AS  | 0.04761904762 | 0.04761904762 | 0.1666666667  |  | 0.2          | #DIV/0! |
| TTC30A  | 0             | 0             | 0.1111111111  |  | 0            | #DIV/0! |
| TTC30B  | 0             | 0             | 0.1111111111  |  | 0            | #DIV/0! |
| TTC31   | 0             | 0             | 0.05555555556 |  | 0            | #DIV/0! |
| TTC32   | 0             | 0             | 0.05555555556 |  | 0            | #DIV/0! |
| TTC33   | 0.04761904762 | 0.04761904762 | 0.05555555556 |  | 0.7          | #DIV/0! |
| TTC34   | 0             | 0             | 0.05555555556 |  | 0            | #DIV/0! |
| TTC37   | 0.04761904762 | 0.04761904762 | 0             |  | inf          | #DIV/0! |
| TTC38   | 0             | 0             | 0.1111111111  |  | 0            | #DIV/0! |
| TTC39A  | 0.04761904762 | 0.04761904762 | 0.05555555556 |  | 0.7          | #DIV/0! |
| C39A-A  | 0.04761904762 | 0.04761904762 | 0.05555555556 |  | 0.7          | #DIV/0! |
| TTC39B  | 0.04761904762 | 0.04761904762 | 0.05555555556 |  | 0.7          | #DIV/0! |
| TTC39C  | 0.09523809524 | 0.09523809524 | 0.05555555556 |  | 1.473684211  | #DIV/0! |
| C39C-A  | 0.09523809524 | 0.09523809524 | 0.05555555556 |  | 1.473684211  | #DIV/0! |
| TTC4    | 0.04761904762 | 0.04761904762 | 0.05555555556 |  | 0.7          | #DIV/0! |
| TTC41P  | 0.04761904762 | 0.04761904762 | 0.05555555556 |  | 0.7          | #DIV/0! |
| TTC5    | 0.04761904762 | 0.04761904762 | 0             |  | inf          | #DIV/0! |
| TTC7A   | 0             | 0             | 0.05555555556 |  | 0            | #DIV/0! |
| TTC9B   | 0.04761904762 | 0.04761904762 | 0.05555555556 |  | 0.7          | #DIV/0! |
| TTF1    | 0.09523809524 | 0.09523809524 | 0             |  | inf          | #DIV/0! |
| TTF2    | 0.04761904762 | 0.04761904762 | 0.05555555556 |  | 0.7          | #DIV/0! |
| TTI1    | 0.1428571429  | 0.1428571429  | 0.1666666667  |  | 0.6666666667 | #DIV/0! |
| TTI2    | 0.04761904762 | 0.04761904762 | 0.1111111111  |  | 0.325        | #DIV/0! |
| TTL     | 0             | 0             | 0.05555555556 |  | 0            | #DIV/0! |
| TTL1    | 0             | 0             | 0.1666666667  |  | 0            | #DIV/0! |
| TTL10   | 0             | 0             | 0.1111111111  |  | 0            | #DIV/0! |
| TTL11   | 0.09523809524 | 0.09523809524 | 0.05555555556 |  | 1.473684211  | #DIV/0! |
| TTL12   | 0             | 0             | 0.1666666667  |  | 0            | #DIV/0! |
| TTL13   | 0.04761904762 | 0.04761904762 | 0.05555555556 |  | 0.7          | #DIV/0! |
| TTL3    | 0.09523809524 | 0.09523809524 | 0             |  | inf          | #DIV/0! |
| TTL4    | 0             | 0             | 0.05555555556 |  | 0            | #DIV/0! |
| TTL6    | 0.1428571429  | 0.1428571429  | 0             |  | inf          | #DIV/0! |
| TTL7    | 0.04761904762 | 0.04761904762 | 0.05555555556 |  | 0.7          | #DIV/0! |
| TTL8    | 0             | 0             | 0.1111111111  |  | 0            | #DIV/0! |
| TTL9    | 0.09523809524 | 0.09523809524 | 0.1111111111  |  | 0.6842105263 | #DIV/0! |
| TTN     | 0             | 0             | 0.1111111111  |  | 0            | #DIV/0! |
| TTN-AS  | 0             | 0             | 0.1111111111  |  | 0            | #DIV/0! |



|        |               |               |               |  |              |         |
|--------|---------------|---------------|---------------|--|--------------|---------|
| TTPA   | 0.1428571429  | 0.1428571429  | 0.1666666667  |  | 0.6666666667 | #DIV/0! |
| TTPAL  | 0.1428571429  | 0.1428571429  | 0.1666666667  |  | 0.6666666667 | #DIV/0! |
| TTR    | 0.09523809524 | 0.09523809524 | 0             |  | inf          | #DIV/0! |
| TTYH1  | 0.09523809524 | 0.09523809524 | 0.05555555556 |  | 1.473684211  | #DIV/0! |
| TTYH2  | 0.04761904762 | 0.04761904762 | 0             |  | inf          | #DIV/0! |
| TTYH3  | 0.04761904762 | 0.04761904762 | 0.1666666667  |  | 0.2          | #DIV/0! |
| TUBA1A | 0.04761904762 | 0.04761904762 | 0.05555555556 |  | 0.7          | #DIV/0! |
| TUBA1B | 0.04761904762 | 0.04761904762 | 0.05555555556 |  | 0.7          | #DIV/0! |
| TUBA1C | 0.04761904762 | 0.04761904762 | 0.05555555556 |  | 0.7          | #DIV/0! |
| TUBA3C | 0.04761904762 | 0.04761904762 | 0             |  | inf          | #DIV/0! |
| TUBA3D | 0             | 0             | 0.05555555556 |  | 0            | #DIV/0! |
| TUBA3E | 0             | 0             | 0.05555555556 |  | 0            | #DIV/0! |
| TUBA3F | 0.04761904762 | 0.04761904762 | 0.05555555556 |  | 0.7          | #DIV/0! |
| TUBA8  | 0.04761904762 | 0.04761904762 | 0.05555555556 |  | 0.7          | #DIV/0! |
| TUBAL3 | 0             | 0             | 0.1666666667  |  | 0            | #DIV/0! |
| TUBB1  | 0.1428571429  | 0.1428571429  | 0.2222222222  |  | 0.4583333333 | #DIV/0! |
| TUBB3  | 0.09523809524 | 0.09523809524 | 0             |  | inf          | #DIV/0! |
| TUBB4A | 0.1428571429  | 0.1428571429  | 0.05555555556 |  | 2.333333333  | #DIV/0! |
| TUBB4B | 0.1428571429  | 0.1428571429  | 0.05555555556 |  | 2.333333333  | #DIV/0! |
| TUBB6  | 0.09523809524 | 0.09523809524 | 0.05555555556 |  | 1.473684211  | #DIV/0! |
| TUBB8  | 0.04761904762 | 0.04761904762 | 0.1111111111  |  | 0.325        | #DIV/0! |
| UBB8P1 | 0.09523809524 | 0.09523809524 | 0             |  | inf          | #DIV/0! |
| TUBBP5 | 0.09523809524 | 0.09523809524 | 0             |  | inf          | #DIV/0! |
| TUBD1  | 0.1428571429  | 0.1428571429  | 0             |  | inf          | #DIV/0! |
| TUBG1  | 0.04761904762 | 0.04761904762 | 0             |  | inf          | #DIV/0! |
| TUBG2  | 0.04761904762 | 0.04761904762 | 0             |  | inf          | #DIV/0! |
| UBGCP  | 0.1904761905  | 0.1904761905  | 0             |  | inf          | #DIV/0! |
| UBGCP  | 0.09523809524 | 0.09523809524 | 0             |  | inf          | #DIV/0! |
| UBGCP  | 0             | 0             | 0.1111111111  |  | 0            | #DIV/0! |
| TUFM   | 0.04761904762 | 0.04761904762 | 0             |  | inf          | #DIV/0! |
| TUFT1  | 0.1428571429  | 0.1428571429  | 0.05555555556 |  | 2.333333333  | #DIV/0! |
| TUG1   | 0.04761904762 | 0.04761904762 | 0.1111111111  |  | 0.325        | #DIV/0! |
| TULP1  | 0.04761904762 | 0.04761904762 | 0.05555555556 |  | 0.7          | #DIV/0! |
| TULP2  | 0.09523809524 | 0.09523809524 | 0.1111111111  |  | 0.6842105263 | #DIV/0! |
| TULP3  | 0.04761904762 | 0.04761904762 | 0.1666666667  |  | 0.2          | #DIV/0! |
| TUSC1  | 0.04761904762 | 0.04761904762 | 0.05555555556 |  | 0.7          | #DIV/0! |
| TUSC2  | 0.09523809524 | 0.09523809524 | 0             |  | inf          | #DIV/0! |
| TUSC3  | 0.09523809524 | 0.09523809524 | 0.1111111111  |  | 0.6842105263 | #DIV/0! |
| TUSC7  | 0.09523809524 | 0.09523809524 | 0.05555555556 |  | 1.473684211  | #DIV/0! |
| TUT4   | 0.04761904762 | 0.04761904762 | 0.05555555556 |  | 0.7          | #DIV/0! |
| TUT7   | 0             | 0             | 0.05555555556 |  | 0            | #DIV/0! |
| TVP23A | 0.04761904762 | 0.04761904762 | 0             |  | inf          | #DIV/0! |
| TVP23B | 0.04761904762 | 0.04761904762 | 0.1111111111  |  | 0.325        | #DIV/0! |
| TVP23C | 0.04761904762 | 0.04761904762 | 0.05555555556 |  | 0.7          | #DIV/0! |
| 23C-CD | 0.04761904762 | 0.04761904762 | 0.05555555556 |  | 0.7          | #DIV/0! |
| TWF1   | 0.04761904762 | 0.04761904762 | 0.05555555556 |  | 0.7          | #DIV/0! |
| TWF2   | 0.04761904762 | 0.04761904762 | 0             |  | inf          | #DIV/0! |
| TWIST1 | 0.04761904762 | 0.04761904762 | 0.2222222222  |  | 0.1375       | #DIV/0! |
| TWIST2 | 0             | 0             | 0.05555555556 |  | 0            | #DIV/0! |
| WISTN  | 0.04761904762 | 0.04761904762 | 0.2222222222  |  | 0.1375       | #DIV/0! |
| TWNK   | 0.1428571429  | 0.1428571429  | 0             |  | inf          | #DIV/0! |

|         |               |               |               |  |             |         |
|---------|---------------|---------------|---------------|--|-------------|---------|
| TWSG1   | 0.09523809524 | 0.09523809524 | 0             |  | inf         | #DIV/0! |
| TXK     | 0.04761904762 | 0.04761904762 | 0.1111111111  |  | 0.325       | #DIV/0! |
| TXLNA   | 0.04761904762 | 0.04761904762 | 0.1111111111  |  | 0.325       | #DIV/0! |
| TXN     | 0.04761904762 | 0.04761904762 | 0.05555555556 |  | 0.7         | #DIV/0! |
| TXN2    | 0             | 0             | 0.1111111111  |  | 0           | #DIV/0! |
| XNDC1   | 0.04761904762 | 0.04761904762 | 0             |  | inf         | #DIV/0! |
| XNDC1   | 0.04761904762 | 0.04761904762 | 0.05555555556 |  | 0.7         | #DIV/0! |
| XNDC12  | 0.04761904762 | 0.04761904762 | 0.05555555556 |  | 0.7         | #DIV/0! |
| XNDC1   | 0.04761904762 | 0.04761904762 | 0             |  | inf         | #DIV/0! |
| XNDC1   | 0.04761904762 | 0.04761904762 | 0             |  | inf         | #DIV/0! |
| XNDC1   | 0             | 0             | 0.05555555556 |  | 0           | #DIV/0! |
| TXNDC2  | 0.09523809524 | 0.09523809524 | 0.05555555556 |  | 1.473684211 | #DIV/0! |
| TXNDC8  | 0.04761904762 | 0.04761904762 | 0.05555555556 |  | 0.7         | #DIV/0! |
| TXNDC9  | 0             | 0             | 0.05555555556 |  | 0           | #DIV/0! |
| TXNL1   | 0.09523809524 | 0.09523809524 | 0             |  | inf         | #DIV/0! |
| TXNL4A  | 0.04761904762 | 0.04761904762 | 0.05555555556 |  | 0.7         | #DIV/0! |
| TXNL4B  | 0.04761904762 | 0.04761904762 | 0             |  | inf         | #DIV/0! |
| TXNRD1  | 0.04761904762 | 0.04761904762 | 0.05555555556 |  | 0.7         | #DIV/0! |
| TXNRD2  | 0.04761904762 | 0.04761904762 | 0.05555555556 |  | 0.7         | #DIV/0! |
| TXNRD3  | 0.04761904762 | 0.04761904762 | 0.05555555556 |  | 0.7         | #DIV/0! |
| TXNRD3N | 0.04761904762 | 0.04761904762 | 0.05555555556 |  | 0.7         | #DIV/0! |
| TYK2    | 0.1428571429  | 0.1428571429  | 0.1111111111  |  | 1.083333333 | #DIV/0! |
| TYMP    | 0             | 0             | 0.1111111111  |  | 0           | #DIV/0! |
| TYMS    | 0.09523809524 | 0.09523809524 | 0             |  | inf         | #DIV/0! |
| TYMSO   | 0.09523809524 | 0.09523809524 | 0             |  | inf         | #DIV/0! |
| TYRO3P  | 0.04761904762 | 0.04761904762 | 0.05555555556 |  | 0.7         | #DIV/0! |
| TYROB   | 0.04761904762 | 0.04761904762 | 0.05555555556 |  | 0.7         | #DIV/0! |
| TYRP1   | 0.09523809524 | 0.09523809524 | 0.05555555556 |  | 1.473684211 | #DIV/0! |
| TYSD1   | 0.09523809524 | 0.09523809524 | 0             |  | inf         | #DIV/0! |
| TYW1    | 0.04761904762 | 0.04761904762 | 0.1111111111  |  | 0.325       | #DIV/0! |
| TYW1B   | 0.1428571429  | 0.1428571429  | 0.1111111111  |  | 1.083333333 | #DIV/0! |
| TYW3    | 0.04761904762 | 0.04761904762 | 0.05555555556 |  | 0.7         | #DIV/0! |
| TYW5    | 0             | 0             | 0.05555555556 |  | 0           | #DIV/0! |
| U2AF1   | 0.04761904762 | 0.04761904762 | 0.1666666667  |  | 0.2         | #DIV/0! |
| U2AF1L  | 0.04761904762 | 0.04761904762 | 0.05555555556 |  | 0.7         | #DIV/0! |
| U2AF1L3 | 0.04761904762 | 0.04761904762 | 0.1666666667  |  | 0.2         | #DIV/0! |
| U2AF2   | 0.09523809524 | 0.09523809524 | 0.05555555556 |  | 1.473684211 | #DIV/0! |
| U2SURF  | 0.1428571429  | 0.1428571429  | 0.05555555556 |  | 2.333333333 | #DIV/0! |
| UACA    | 0.04761904762 | 0.04761904762 | 0.05555555556 |  | 0.7         | #DIV/0! |
| UAP1    | 0.1428571429  | 0.1428571429  | 0             |  | inf         | #DIV/0! |
| UAP1L1  | 0.1428571429  | 0.1428571429  | 0.05555555556 |  | 2.333333333 | #DIV/0! |
| UBA2    | 0.04761904762 | 0.04761904762 | 0.05555555556 |  | 0.7         | #DIV/0! |
| UBA3    | 0.04761904762 | 0.04761904762 | 0             |  | inf         | #DIV/0! |
| UBA5    | 0.1428571429  | 0.1428571429  | 0.05555555556 |  | 2.333333333 | #DIV/0! |
| UBA52   | 0.1428571429  | 0.1428571429  | 0.1111111111  |  | 1.083333333 | #DIV/0! |
| UBA6    | 0.04761904762 | 0.04761904762 | 0.05555555556 |  | 0.7         | #DIV/0! |
| BA6-AS  | 0.04761904762 | 0.04761904762 | 0.05555555556 |  | 0.7         | #DIV/0! |
| UBA7    | 0.09523809524 | 0.09523809524 | 0             |  | inf         | #DIV/0! |
| UBAC1   | 0.04761904762 | 0.04761904762 | 0             |  | inf         | #DIV/0! |
| UBALD1  | 0.04761904762 | 0.04761904762 | 0             |  | inf         | #DIV/0! |
| UBALD2  | 0.04761904762 | 0.04761904762 | 0             |  | inf         | #DIV/0! |

|        |               |               |               |  |               |         |
|--------|---------------|---------------|---------------|--|---------------|---------|
| UBAP1  | 0.09523809524 | 0.09523809524 | 0.05555555556 |  | 1.473684211   | #DIV/0! |
| UBAP1L | 0.04761904762 | 0.04761904762 | 0.05555555556 |  | 0.7           | #DIV/0! |
| UBAP2  | 0.09523809524 | 0.09523809524 | 0.05555555556 |  | 1.473684211   | #DIV/0! |
| UBAP2L | 0.1904761905  | 0.1904761905  | 0.05555555556 |  | 3.294117647   | #DIV/0! |
| BASH3  | 0.04761904762 | 0.04761904762 | 0.1111111111  |  | 0.325         | #DIV/0! |
| UBB    | 0.04761904762 | 0.04761904762 | 0.05555555556 |  | 0.7           | #DIV/0! |
| UBBP4  | 0.09523809524 | 0.09523809524 | 0.05555555556 |  | 1.473684211   | #DIV/0! |
| UBC    | 0.04761904762 | 0.04761904762 | 0.05555555556 |  | 0.7           | #DIV/0! |
| UBE2B  | 0.04761904762 | 0.04761904762 | 0             |  | inf           | #DIV/0! |
| UBE2C  | 0.1428571429  | 0.1428571429  | 0.16666666667 |  | 0.66666666667 | #DIV/0! |
| BE2CP  | 0.1428571429  | 0.1428571429  | 0.05555555556 |  | 2.333333333   | #DIV/0! |
| UBE2D1 | 0.09523809524 | 0.09523809524 | 0.05555555556 |  | 1.473684211   | #DIV/0! |
| UBE2D2 | 0.04761904762 | 0.04761904762 | 0             |  | inf           | #DIV/0! |
| UBE2D3 | 0             | 0             | 0.05555555556 |  | 0             | #DIV/0! |
| E2D3-A | 0             | 0             | 0.05555555556 |  | 0             | #DIV/0! |
| UBE2D4 | 0.04761904762 | 0.04761904762 | 0.16666666667 |  | 0.2           | #DIV/0! |
| UBE2E1 | 0.04761904762 | 0.04761904762 | 0             |  | inf           | #DIV/0! |
| E2E1-A | 0.04761904762 | 0.04761904762 | 0             |  | inf           | #DIV/0! |
| UBE2E2 | 0.04761904762 | 0.04761904762 | 0             |  | inf           | #DIV/0! |
| E2E2-A | 0.04761904762 | 0.04761904762 | 0             |  | inf           | #DIV/0! |
| UBE2E3 | 0             | 0             | 0.05555555556 |  | 0             | #DIV/0! |
| UBE2F  | 0             | 0             | 0.05555555556 |  | 0             | #DIV/0! |
| E2F-SC | 0             | 0             | 0.05555555556 |  | 0             | #DIV/0! |
| UBE2G1 | 0             | 0             | 0.1111111111  |  | 0             | #DIV/0! |
| UBE2G2 | 0.04761904762 | 0.04761904762 | 0.1111111111  |  | 0.325         | #DIV/0! |
| UBE2H  | 0.04761904762 | 0.04761904762 | 0.05555555556 |  | 0.7           | #DIV/0! |
| UBE2I  | 0.04761904762 | 0.04761904762 | 0.2222222222  |  | 0.1375        | #DIV/0! |
| UBE2J2 | 0             | 0             | 0.1111111111  |  | 0             | #DIV/0! |
| UBE2K  | 0.1904761905  | 0.1904761905  | 0.05555555556 |  | 3.294117647   | #DIV/0! |
| UBE2L3 | 0.04761904762 | 0.04761904762 | 0.05555555556 |  | 0.7           | #DIV/0! |
| UBE2M  | 0.1428571429  | 0.1428571429  | 0.05555555556 |  | 2.333333333   | #DIV/0! |
| BE2MP  | 0.04761904762 | 0.04761904762 | 0             |  | inf           | #DIV/0! |
| UBE2N  | 0.04761904762 | 0.04761904762 | 0.05555555556 |  | 0.7           | #DIV/0! |
| UBE2O  | 0.04761904762 | 0.04761904762 | 0             |  | inf           | #DIV/0! |
| UBE2Q1 | 0.1904761905  | 0.1904761905  | 0.1111111111  |  | 1.529411765   | #DIV/0! |
| E2Q1-A | 0.1904761905  | 0.1904761905  | 0.1111111111  |  | 1.529411765   | #DIV/0! |
| UBE2Q2 | 0.04761904762 | 0.04761904762 | 0.05555555556 |  | 0.7           | #DIV/0! |
| BE2Q2I | 0.04761904762 | 0.04761904762 | 0.05555555556 |  | 0.7           | #DIV/0! |
| BE2Q2P | 0.04761904762 | 0.04761904762 | 0.05555555556 |  | 0.7           | #DIV/0! |
| BE2Q2F | 0.04761904762 | 0.04761904762 | 0.05555555556 |  | 0.7           | #DIV/0! |
| BE2QL  | 0             | 0             | 0.05555555556 |  | 0             | #DIV/0! |
| UBE2R2 | 0.09523809524 | 0.09523809524 | 0.05555555556 |  | 1.473684211   | #DIV/0! |
| UBE2S  | 0.09523809524 | 0.09523809524 | 0.05555555556 |  | 1.473684211   | #DIV/0! |
| UBE2T  | 0.1428571429  | 0.1428571429  | 0             |  | inf           | #DIV/0! |
| UBE2U  | 0.04761904762 | 0.04761904762 | 0.05555555556 |  | 0.7           | #DIV/0! |
| UBE2V1 | 0.09523809524 | 0.09523809524 | 0.16666666667 |  | 0.4210526316  | #DIV/0! |
| UBE2V2 | 0.09523809524 | 0.09523809524 | 0.16666666667 |  | 0.4210526316  | #DIV/0! |
| UBE2W  | 0.1904761905  | 0.1904761905  | 0.1111111111  |  | 1.529411765   | #DIV/0! |
| UBE2Z  | 0.1428571429  | 0.1428571429  | 0             |  | inf           | #DIV/0! |
| UBE3B  | 0             | 0             | 0.05555555556 |  | 0             | #DIV/0! |
| UBE3C  | 0.1428571429  | 0.1428571429  | 0.05555555556 |  | 2.333333333   | #DIV/0! |

|         |               |               |              |  |              |         |
|---------|---------------|---------------|--------------|--|--------------|---------|
| UBE4B   | 0             | 0             | 0.1111111111 |  | 0            | #DIV/0! |
| UBFD1   | 0.04761904762 | 0.04761904762 | 0            |  | inf          | #DIV/0! |
| UBIAD1  | 0.04761904762 | 0.04761904762 | 0.1111111111 |  | 0.325        | #DIV/0! |
| UBL4B   | 0.04761904762 | 0.04761904762 | 0            |  | inf          | #DIV/0! |
| UBL5    | 0.1428571429  | 0.1428571429  | 0.1111111111 |  | 1.083333333  | #DIV/0! |
| UBL7    | 0.04761904762 | 0.04761904762 | 0.0555555556 |  | 0.7          | #DIV/0! |
| BL7-AS  | 0.04761904762 | 0.04761904762 | 0.0555555556 |  | 0.7          | #DIV/0! |
| UBLCPI  | 0.04761904762 | 0.04761904762 | 0.0555555556 |  | 0.7          | #DIV/0! |
| UBN2    | 0.04761904762 | 0.04761904762 | 0.0555555556 |  | 0.7          | #DIV/0! |
| UBOX5   | 0.1904761905  | 0.1904761905  | 0.0555555556 |  | 3.294117647  | #DIV/0! |
| BOX5-A  | 0.1904761905  | 0.1904761905  | 0.0555555556 |  | 3.294117647  | #DIV/0! |
| UBP1    | 0.09523809524 | 0.09523809524 | 0            |  | inf          | #DIV/0! |
| JBQLN1  | 0             | 0             | 0.0555555556 |  | 0            | #DIV/0! |
| JBQLN3  | 0.04761904762 | 0.04761904762 | 0            |  | inf          | #DIV/0! |
| JBQLN4  | 0.1428571429  | 0.1428571429  | 0.1111111111 |  | 1.083333333  | #DIV/0! |
| JBQLN10 | 0.04761904762 | 0.04761904762 | 0            |  | inf          | #DIV/0! |
| UBR2    | 0.04761904762 | 0.04761904762 | 0.0555555556 |  | 0.7          | #DIV/0! |
| UBR3    | 0             | 0             | 0.0555555556 |  | 0            | #DIV/0! |
| UBR4    | 0.04761904762 | 0.04761904762 | 0.1111111111 |  | 0.325        | #DIV/0! |
| UBR5    | 0.1904761905  | 0.1904761905  | 0.1111111111 |  | 1.529411765  | #DIV/0! |
| BR5-AS  | 0.1904761905  | 0.1904761905  | 0.1111111111 |  | 1.529411765  | #DIV/0! |
| UBTD1   | 0.1428571429  | 0.1428571429  | 0            |  | inf          | #DIV/0! |
| UBTD2   | 0             | 0             | 0.0555555556 |  | 0            | #DIV/0! |
| UBTF    | 0.09523809524 | 0.09523809524 | 0            |  | inf          | #DIV/0! |
| UBXN10  | 0.04761904762 | 0.04761904762 | 0.1111111111 |  | 0.325        | #DIV/0! |
| BXN10-A | 0.04761904762 | 0.04761904762 | 0.1111111111 |  | 0.325        | #DIV/0! |
| UBXN11  | 0.04761904762 | 0.04761904762 | 0.1111111111 |  | 0.325        | #DIV/0! |
| JBXN2B  | 0.1428571429  | 0.1428571429  | 0.1666666667 |  | 0.666666667  | #DIV/0! |
| UBXN4   | 0.04761904762 | 0.04761904762 | 0.0555555556 |  | 0.7          | #DIV/0! |
| UBXN6   | 0.09523809524 | 0.09523809524 | 0.0555555556 |  | 1.473684211  | #DIV/0! |
| UBXN7   | 0.1428571429  | 0.1428571429  | 0.0555555556 |  | 2.333333333  | #DIV/0! |
| BXN7-AS | 0.1428571429  | 0.1428571429  | 0.0555555556 |  | 2.333333333  | #DIV/0! |
| UBXN8   | 0.04761904762 | 0.04761904762 | 0.1111111111 |  | 0.325        | #DIV/0! |
| UC.134  | 0.1428571429  | 0.1428571429  | 0.0555555556 |  | 2.333333333  | #DIV/0! |
| UCA1    | 0.1428571429  | 0.1428571429  | 0.1111111111 |  | 1.083333333  | #DIV/0! |
| UCHL1   | 0.04761904762 | 0.04761904762 | 0            |  | inf          | #DIV/0! |
| CHL1-A  | 0.04761904762 | 0.04761904762 | 0            |  | inf          | #DIV/0! |
| UCHL3   | 0             | 0             | 0.0555555556 |  | 0            | #DIV/0! |
| UCHL5   | 0.1428571429  | 0.1428571429  | 0            |  | inf          | #DIV/0! |
| UCK1    | 0.09523809524 | 0.09523809524 | 0.0555555556 |  | 1.473684211  | #DIV/0! |
| UCK2    | 0.1428571429  | 0.1428571429  | 0            |  | inf          | #DIV/0! |
| UCKL1   | 0.1428571429  | 0.1428571429  | 0.2222222222 |  | 0.4583333333 | #DIV/0! |
| CKL1-A  | 0.1428571429  | 0.1428571429  | 0.2222222222 |  | 0.4583333333 | #DIV/0! |
| UCMA    | 0.09523809524 | 0.09523809524 | 0.1111111111 |  | 0.6842105263 | #DIV/0! |
| UCN2    | 0.09523809524 | 0.09523809524 | 0            |  | inf          | #DIV/0! |
| UCN3    | 0             | 0             | 0.1666666667 |  | 0            | #DIV/0! |
| UCP1    | 0             | 0             | 0.0555555556 |  | 0            | #DIV/0! |
| UFC1    | 0.1428571429  | 0.1428571429  | 0            |  | inf          | #DIV/0! |
| UFD1    | 0.04761904762 | 0.04761904762 | 0.0555555556 |  | 0.7          | #DIV/0! |
| UFSP1   | 0.04761904762 | 0.04761904762 | 0.0555555556 |  | 0.7          | #DIV/0! |
| UFSP2   | 0             | 0             | 0.0555555556 |  | 0            | #DIV/0! |

|         |               |               |               |  |             |         |
|---------|---------------|---------------|---------------|--|-------------|---------|
| UGCG    | 0.04761904762 | 0.04761904762 | 0.05555555556 |  | 0.7         | #DIV/0! |
| UGDH    | 0.1904761905  | 0.1904761905  | 0.05555555556 |  | 3.294117647 | #DIV/0! |
| GDH-AS  | 0.1904761905  | 0.1904761905  | 0.05555555556 |  | 3.294117647 | #DIV/0! |
| UGGT1   | 0             | 0             | 0.05555555556 |  | 0           | #DIV/0! |
| UGP2    | 0             | 0             | 0.05555555556 |  | 0           | #DIV/0! |
| UGT1A1  | 0             | 0             | 0.05555555556 |  | 0           | #DIV/0! |
| UGT1A10 | 0             | 0             | 0.05555555556 |  | 0           | #DIV/0! |
| UGT1A3  | 0             | 0             | 0.05555555556 |  | 0           | #DIV/0! |
| UGT1A4  | 0             | 0             | 0.05555555556 |  | 0           | #DIV/0! |
| UGT1A5  | 0             | 0             | 0.05555555556 |  | 0           | #DIV/0! |
| UGT1A6  | 0             | 0             | 0.05555555556 |  | 0           | #DIV/0! |
| UGT1A7  | 0             | 0             | 0.05555555556 |  | 0           | #DIV/0! |
| UGT1A8  | 0             | 0             | 0.05555555556 |  | 0           | #DIV/0! |
| UGT1A9  | 0             | 0             | 0.05555555556 |  | 0           | #DIV/0! |
| UGT2A10 | 0.04761904762 | 0.04761904762 | 0.05555555556 |  | 0.7         | #DIV/0! |
| UGT2A20 | 0.04761904762 | 0.04761904762 | 0.05555555556 |  | 0.7         | #DIV/0! |
| UGT2A30 | 0.04761904762 | 0.04761904762 | 0.05555555556 |  | 0.7         | #DIV/0! |
| UGT2B10 | 0.04761904762 | 0.04761904762 | 0.05555555556 |  | 0.7         | #DIV/0! |
| UGT2B10 | 0.04761904762 | 0.04761904762 | 0.05555555556 |  | 0.7         | #DIV/0! |
| UGT2B10 | 0.04761904762 | 0.04761904762 | 0.05555555556 |  | 0.7         | #DIV/0! |
| UGT2B10 | 0.04761904762 | 0.04761904762 | 0.05555555556 |  | 0.7         | #DIV/0! |
| UGT2B20 | 0.04761904762 | 0.04761904762 | 0.05555555556 |  | 0.7         | #DIV/0! |
| UGT2B40 | 0.04761904762 | 0.04761904762 | 0.05555555556 |  | 0.7         | #DIV/0! |
| UGT2B70 | 0.04761904762 | 0.04761904762 | 0.05555555556 |  | 0.7         | #DIV/0! |
| UGT3A10 | 0.04761904762 | 0.04761904762 | 0.05555555556 |  | 0.7         | #DIV/0! |
| UGT3A20 | 0.04761904762 | 0.04761904762 | 0.05555555556 |  | 0.7         | #DIV/0! |
| UGT8    | 0             | 0             | 0.05555555556 |  | 0           | #DIV/0! |
| UHMK1   | 0.1428571429  | 0.1428571429  | 0             |  | inf         | #DIV/0! |
| UHRF1   | 0.09523809524 | 0.09523809524 | 0.05555555556 |  | 1.473684211 | #DIV/0! |
| HRF1BP  | 0.04761904762 | 0.04761904762 | 0             |  | inf         | #DIV/0! |
| HRF1BP  | 0.04761904762 | 0.04761904762 | 0.05555555556 |  | 0.7         | #DIV/0! |
| UHRF2   | 0.04761904762 | 0.04761904762 | 0.05555555556 |  | 0.7         | #DIV/0! |
| UIMC1   | 0.09523809524 | 0.09523809524 | 0.05555555556 |  | 1.473684211 | #DIV/0! |
| ULK1    | 0.09523809524 | 0.09523809524 | 0.05555555556 |  | 1.473684211 | #DIV/0! |
| ULK2    | 0.09523809524 | 0.09523809524 | 0.05555555556 |  | 1.473684211 | #DIV/0! |
| ULK3    | 0.04761904762 | 0.04761904762 | 0.05555555556 |  | 0.7         | #DIV/0! |
| ULK4    | 0.04761904762 | 0.04761904762 | 0             |  | inf         | #DIV/0! |
| UMAD1   | 0.04761904762 | 0.04761904762 | 0.1666666667  |  | 0.2         | #DIV/0! |
| UMOD    | 0.04761904762 | 0.04761904762 | 0             |  | inf         | #DIV/0! |
| UMODL   | 0.04761904762 | 0.04761904762 | 0.1111111111  |  | 0.325       | #DIV/0! |
| MODL1-A | 0.04761904762 | 0.04761904762 | 0.1111111111  |  | 0.325       | #DIV/0! |
| UMPS    | 0.04761904762 | 0.04761904762 | 0.05555555556 |  | 0.7         | #DIV/0! |
| UNC119  | 0.04761904762 | 0.04761904762 | 0.05555555556 |  | 0.7         | #DIV/0! |
| UNC119I | 0             | 0             | 0.1111111111  |  | 0           | #DIV/0! |
| UNC13A  | 0.1428571429  | 0.1428571429  | 0.1111111111  |  | 1.083333333 | #DIV/0! |
| UNC13B  | 0.09523809524 | 0.09523809524 | 0.05555555556 |  | 1.473684211 | #DIV/0! |
| UNC13C  | 0.04761904762 | 0.04761904762 | 0.05555555556 |  | 0.7         | #DIV/0! |
| UNC13D  | 0.04761904762 | 0.04761904762 | 0             |  | inf         | #DIV/0! |
| UNC45A  | 0.04761904762 | 0.04761904762 | 0.05555555556 |  | 0.7         | #DIV/0! |
| UNC50   | 0             | 0             | 0.05555555556 |  | 0           | #DIV/0! |
| UNC5A   | 0.09523809524 | 0.09523809524 | 0.05555555556 |  | 1.473684211 | #DIV/0! |

|         |               |               |               |  |              |         |
|---------|---------------|---------------|---------------|--|--------------|---------|
| UNC5B   | 0.09523809524 | 0.09523809524 | 0             |  | inf          | #DIV/0! |
| NC5B-AS | 0.09523809524 | 0.09523809524 | 0             |  | inf          | #DIV/0! |
| UNC5C   | 0             | 0             | 0.05555555556 |  | 0            | #DIV/0! |
| JNC5CI  | 0             | 0             | 0.05555555556 |  | 0            | #DIV/0! |
| UNC5D   | 0.04761904762 | 0.04761904762 | 0.1111111111  |  | 0.325        | #DIV/0! |
| UNC80   | 0             | 0             | 0.05555555556 |  | 0            | #DIV/0! |
| UNCX    | 0.04761904762 | 0.04761904762 | 0.1666666667  |  | 0.2          | #DIV/0! |
| UNG     | 0             | 0             | 0.05555555556 |  | 0            | #DIV/0! |
| UNK     | 0.04761904762 | 0.04761904762 | 0             |  | inf          | #DIV/0! |
| UNKL    | 0.09523809524 | 0.09523809524 | 0.2222222222  |  | 0.2894736842 | #DIV/0! |
| JNQ649  | 0.04761904762 | 0.04761904762 | 0.05555555556 |  | 0.7          | #DIV/0! |
| UOX     | 0.04761904762 | 0.04761904762 | 0.05555555556 |  | 0.7          | #DIV/0! |
| UPB1    | 0.04761904762 | 0.04761904762 | 0.1111111111  |  | 0.325        | #DIV/0! |
| UPF1    | 0.1428571429  | 0.1428571429  | 0.1111111111  |  | 1.083333333  | #DIV/0! |
| UPF2    | 0.09523809524 | 0.09523809524 | 0.1111111111  |  | 0.6842105263 | #DIV/0! |
| UPK1A   | 0.04761904762 | 0.04761904762 | 0.05555555556 |  | 0.7          | #DIV/0! |
| PK1A-AS | 0.04761904762 | 0.04761904762 | 0.05555555556 |  | 0.7          | #DIV/0! |
| UPK1B   | 0.09523809524 | 0.09523809524 | 0.05555555556 |  | 1.473684211  | #DIV/0! |
| UPK3A   | 0             | 0             | 0.1111111111  |  | 0            | #DIV/0! |
| UPK3B   | 0.09523809524 | 0.09523809524 | 0.1111111111  |  | 0.6842105263 | #DIV/0! |
| PK3BL   | 0.04761904762 | 0.04761904762 | 0.05555555556 |  | 0.7          | #DIV/0! |
| PK3BL   | 0.04761904762 | 0.04761904762 | 0.05555555556 |  | 0.7          | #DIV/0! |
| UPP1    | 0.04761904762 | 0.04761904762 | 0.2222222222  |  | 0.1375       | #DIV/0! |
| UPP2    | 0             | 0             | 0.05555555556 |  | 0            | #DIV/0! |
| UQCC1   | 0.09523809524 | 0.09523809524 | 0.1111111111  |  | 0.6842105263 | #DIV/0! |
| UQCC2   | 0.04761904762 | 0.04761904762 | 0             |  | inf          | #DIV/0! |
| UQCR10  | 0.04761904762 | 0.04761904762 | 0.1111111111  |  | 0.325        | #DIV/0! |
| UQCR11  | 0.09523809524 | 0.09523809524 | 0.1111111111  |  | 0.6842105263 | #DIV/0! |
| UQCRB   | 0.1904761905  | 0.1904761905  | 0.1666666667  |  | 0.9411764706 | #DIV/0! |
| JQCRC1  | 0.09523809524 | 0.09523809524 | 0             |  | inf          | #DIV/0! |
| JQCRC2  | 0.04761904762 | 0.04761904762 | 0             |  | inf          | #DIV/0! |
| QCRFS   | 0.04761904762 | 0.04761904762 | 0.1666666667  |  | 0.2          | #DIV/0! |
| UQCRH   | 0.04761904762 | 0.04761904762 | 0.05555555556 |  | 0.7          | #DIV/0! |
| JQCRH   | 0.04761904762 | 0.04761904762 | 0.1111111111  |  | 0.325        | #DIV/0! |
| UQCRO   | 0.04761904762 | 0.04761904762 | 0             |  | inf          | #DIV/0! |
| URAHPO  | 0.09523809524 | 0.09523809524 | 0             |  | inf          | #DIV/0! |
| URB1    | 0.04761904762 | 0.04761904762 | 0.1111111111  |  | 0.325        | #DIV/0! |
| RB1-AS  | 0.04761904762 | 0.04761904762 | 0.1111111111  |  | 0.325        | #DIV/0! |
| URB2    | 0.1428571429  | 0.1428571429  | 0             |  | inf          | #DIV/0! |
| URGCP   | 0.04761904762 | 0.04761904762 | 0.1666666667  |  | 0.2          | #DIV/0! |
| CP-MR   | 0.04761904762 | 0.04761904762 | 0.1666666667  |  | 0.2          | #DIV/0! |
| URII    | 0.04761904762 | 0.04761904762 | 0.1666666667  |  | 0.2          | #DIV/0! |
| URM1    | 0.09523809524 | 0.09523809524 | 0.05555555556 |  | 1.473684211  | #DIV/0! |
| UROCI   | 0.04761904762 | 0.04761904762 | 0.05555555556 |  | 0.7          | #DIV/0! |
| UROD    | 0.04761904762 | 0.04761904762 | 0.05555555556 |  | 0.7          | #DIV/0! |
| UROS    | 0.2380952381  | 0.2380952381  | 0.05555555556 |  | 4.375        | #DIV/0! |
| USB1    | 0.04761904762 | 0.04761904762 | 0             |  | inf          | #DIV/0! |
| USE1    | 0.1428571429  | 0.1428571429  | 0.1111111111  |  | 1.083333333  | #DIV/0! |
| USF1    | 0.1428571429  | 0.1428571429  | 0             |  | inf          | #DIV/0! |
| USF2    | 0.04761904762 | 0.04761904762 | 0.05555555556 |  | 0.7          | #DIV/0! |
| USF3    | 0.09523809524 | 0.09523809524 | 0.05555555556 |  | 1.473684211  | #DIV/0! |

|                |               |               |               |  |              |         |
|----------------|---------------|---------------|---------------|--|--------------|---------|
| <b>USH1G</b>   | 0.04761904762 | 0.04761904762 | 0             |  | inf          | #DIV/0! |
| <b>USH2A</b>   | 0.1904761905  | 0.1904761905  | 0             |  | inf          | #DIV/0! |
| <b>USHBP1</b>  | 0.1428571429  | 0.1428571429  | 0.1111111111  |  | 1.083333333  | #DIV/0! |
| <b>USO1</b>    | 0.04761904762 | 0.04761904762 | 0.05555555556 |  | 0.7          | #DIV/0! |
| <b>USP1</b>    | 0.04761904762 | 0.04761904762 | 0.05555555556 |  | 0.7          | #DIV/0! |
| <b>USP10</b>   | 0.04761904762 | 0.04761904762 | 0             |  | inf          | #DIV/0! |
| <b>USP13</b>   | 0.1904761905  | 0.1904761905  | 0.05555555556 |  | 3.294117647  | #DIV/0! |
| <b>USP14</b>   | 0.09523809524 | 0.09523809524 | 0             |  | inf          | #DIV/0! |
| <b>USP15</b>   | 0.09523809524 | 0.09523809524 | 0             |  | inf          | #DIV/0! |
| <b>USP16</b>   | 0.04761904762 | 0.04761904762 | 0.1111111111  |  | 0.325        | #DIV/0! |
| <b>JSP17L1</b> | 0.09523809524 | 0.09523809524 | 0.2222222222  |  | 0.2894736842 | #DIV/0! |
| <b>JSP17L2</b> | 0.09523809524 | 0.09523809524 | 0.1111111111  |  | 0.6842105263 | #DIV/0! |
| <b>JSP17L3</b> | 0.09523809524 | 0.09523809524 | 0.2222222222  |  | 0.2894736842 | #DIV/0! |
| <b>JSP17L4</b> | 0.09523809524 | 0.09523809524 | 0.2222222222  |  | 0.2894736842 | #DIV/0! |
| <b>JSP17L7</b> | 0.09523809524 | 0.09523809524 | 0.1111111111  |  | 0.6842105263 | #DIV/0! |
| <b>JSP17L8</b> | 0.09523809524 | 0.09523809524 | 0.2222222222  |  | 0.2894736842 | #DIV/0! |
| <b>USP18</b>   | 0.04761904762 | 0.04761904762 | 0.05555555556 |  | 0.7          | #DIV/0! |
| <b>USP19</b>   | 0.09523809524 | 0.09523809524 | 0             |  | inf          | #DIV/0! |
| <b>USP20</b>   | 0.09523809524 | 0.09523809524 | 0.05555555556 |  | 1.473684211  | #DIV/0! |
| <b>USP21</b>   | 0.1428571429  | 0.1428571429  | 0             |  | inf          | #DIV/0! |
| <b>USP22</b>   | 0.09523809524 | 0.09523809524 | 0.05555555556 |  | 1.473684211  | #DIV/0! |
| <b>USP24</b>   | 0.04761904762 | 0.04761904762 | 0.05555555556 |  | 0.7          | #DIV/0! |
| <b>USP25</b>   | 0.04761904762 | 0.04761904762 | 0.1111111111  |  | 0.325        | #DIV/0! |
| <b>USP29</b>   | 0.1428571429  | 0.1428571429  | 0.05555555556 |  | 2.333333333  | #DIV/0! |
| <b>USP3</b>    | 0.04761904762 | 0.04761904762 | 0.05555555556 |  | 0.7          | #DIV/0! |
| <b>SP3-AS</b>  | 0.04761904762 | 0.04761904762 | 0.05555555556 |  | 0.7          | #DIV/0! |
| <b>USP30</b>   | 0             | 0             | 0.05555555556 |  | 0            | #DIV/0! |
| <b>SP30-AS</b> | 0             | 0             | 0.05555555556 |  | 0            | #DIV/0! |
| <b>USP31</b>   | 0.04761904762 | 0.04761904762 | 0             |  | inf          | #DIV/0! |
| <b>USP32</b>   | 0.1428571429  | 0.1428571429  | 0             |  | inf          | #DIV/0! |
| <b>JSP32P1</b> | 0.04761904762 | 0.04761904762 | 0.05555555556 |  | 0.7          | #DIV/0! |
| <b>JSP32P2</b> | 0.04761904762 | 0.04761904762 | 0.1111111111  |  | 0.325        | #DIV/0! |
| <b>JSP32P3</b> | 0.09523809524 | 0.09523809524 | 0.05555555556 |  | 1.473684211  | #DIV/0! |
| <b>USP33</b>   | 0.04761904762 | 0.04761904762 | 0.05555555556 |  | 0.7          | #DIV/0! |
| <b>USP34</b>   | 0.09523809524 | 0.09523809524 | 0.05555555556 |  | 1.473684211  | #DIV/0! |
| <b>USP36</b>   | 0.04761904762 | 0.04761904762 | 0             |  | inf          | #DIV/0! |
| <b>USP37</b>   | 0             | 0             | 0.05555555556 |  | 0            | #DIV/0! |
| <b>USP38</b>   | 0             | 0             | 0.05555555556 |  | 0            | #DIV/0! |
| <b>USP39</b>   | 0             | 0             | 0.05555555556 |  | 0            | #DIV/0! |
| <b>USP4</b>    | 0.1428571429  | 0.1428571429  | 0             |  | inf          | #DIV/0! |
| <b>USP40</b>   | 0             | 0             | 0.05555555556 |  | 0            | #DIV/0! |
| <b>USP42</b>   | 0.04761904762 | 0.04761904762 | 0.1666666667  |  | 0.2          | #DIV/0! |
| <b>USP43</b>   | 0.04761904762 | 0.04761904762 | 0.05555555556 |  | 0.7          | #DIV/0! |
| <b>USP44</b>   | 0.04761904762 | 0.04761904762 | 0.05555555556 |  | 0.7          | #DIV/0! |
| <b>USP46</b>   | 0.2380952381  | 0.2380952381  | 0.05555555556 |  | 4.375        | #DIV/0! |
| <b>SP46-AS</b> | 0.2380952381  | 0.2380952381  | 0.05555555556 |  | 4.375        | #DIV/0! |
| <b>USP48</b>   | 0.04761904762 | 0.04761904762 | 0.1111111111  |  | 0.325        | #DIV/0! |
| <b>USP49</b>   | 0.04761904762 | 0.04761904762 | 0.05555555556 |  | 0.7          | #DIV/0! |
| <b>USP5</b>    | 0.04761904762 | 0.04761904762 | 0.1111111111  |  | 0.325        | #DIV/0! |
| <b>USP50</b>   | 0.1428571429  | 0.1428571429  | 0.05555555556 |  | 2.333333333  | #DIV/0! |
| <b>USP53</b>   | 0             | 0             | 0.05555555556 |  | 0            | #DIV/0! |

|         |               |               |               |  |              |         |
|---------|---------------|---------------|---------------|--|--------------|---------|
| USP54   | 0.1904761905  | 0.1904761905  | 0.05555555556 |  | 3.294117647  | #DIV/0! |
| USP6    | 0             | 0             | 0.1111111111  |  | 0            | #DIV/0! |
| USP6NL  | 0.09523809524 | 0.09523809524 | 0.1111111111  |  | 0.6842105263 | #DIV/0! |
| USP7    | 0.09523809524 | 0.09523809524 | 0             |  | inf          | #DIV/0! |
| USP8    | 0.1428571429  | 0.1428571429  | 0.05555555556 |  | 2.333333333  | #DIV/0! |
| UTAT33  | 0             | 0             | 0.05555555556 |  | 0            | #DIV/0! |
| UTF1    | 0.1904761905  | 0.1904761905  | 0             |  | inf          | #DIV/0! |
| UTP11   | 0.04761904762 | 0.04761904762 | 0.05555555556 |  | 0.7          | #DIV/0! |
| UTP15   | 0             | 0             | 0.05555555556 |  | 0            | #DIV/0! |
| UTP18   | 0.04761904762 | 0.04761904762 | 0             |  | inf          | #DIV/0! |
| UTP20   | 0.04761904762 | 0.04761904762 | 0.05555555556 |  | 0.7          | #DIV/0! |
| UTP23   | 0.1904761905  | 0.1904761905  | 0.1666666667  |  | 0.9411764706 | #DIV/0! |
| UTP25   | 0.1428571429  | 0.1428571429  | 0             |  | inf          | #DIV/0! |
| UTP3    | 0.09523809524 | 0.09523809524 | 0.05555555556 |  | 1.473684211  | #DIV/0! |
| UTP4    | 0.1428571429  | 0.1428571429  | 0.05555555556 |  | 2.333333333  | #DIV/0! |
| UTP6    | 0             | 0             | 0             |  |              | #DIV/0! |
| UTS2    | 0             | 0             | 0.05555555556 |  | 0            | #DIV/0! |
| UTS2B   | 0.09523809524 | 0.09523809524 | 0.05555555556 |  | 1.473684211  | #DIV/0! |
| UTS2R   | 0.04761904762 | 0.04761904762 | 0             |  | inf          | #DIV/0! |
| UVSSA   | 0.04761904762 | 0.04761904762 | 0             |  | inf          | #DIV/0! |
| UXS1    | 0             | 0             | 0.05555555556 |  | 0            | #DIV/0! |
| VAC14   | 0.04761904762 | 0.04761904762 | 0             |  | inf          | #DIV/0! |
| AC14-AS | 0.04761904762 | 0.04761904762 | 0             |  | inf          | #DIV/0! |
| VAMP1   | 0.04761904762 | 0.04761904762 | 0.1111111111  |  | 0.325        | #DIV/0! |
| VAMP2   | 0             | 0             | 0.05555555556 |  | 0            | #DIV/0! |
| VAMP3   | 0             | 0             | 0.05555555556 |  | 0            | #DIV/0! |
| VAMP4   | 0.1428571429  | 0.1428571429  | 0.05555555556 |  | 2.333333333  | #DIV/0! |
| VAMP5   | 0             | 0             | 0.05555555556 |  | 0            | #DIV/0! |
| VAMP8   | 0             | 0             | 0.05555555556 |  | 0            | #DIV/0! |
| VAPA    | 0.09523809524 | 0.09523809524 | 0.05555555556 |  | 1.473684211  | #DIV/0! |
| VAPB    | 0.1428571429  | 0.1428571429  | 0.2222222222  |  | 0.4583333333 | #DIV/0! |
| VAR5    | 0.04761904762 | 0.04761904762 | 0             |  | inf          | #DIV/0! |
| VASH2   | 0.09523809524 | 0.09523809524 | 0             |  | inf          | #DIV/0! |
| VASP    | 0.09523809524 | 0.09523809524 | 0.1111111111  |  | 0.6842105263 | #DIV/0! |
| VAT1    | 0.04761904762 | 0.04761904762 | 0             |  | inf          | #DIV/0! |
| VAT1L   | 0.09523809524 | 0.09523809524 | 0             |  | inf          | #DIV/0! |
| VAV1    | 0.1428571429  | 0.1428571429  | 0.05555555556 |  | 2.333333333  | #DIV/0! |
| VAV2    | 0.04761904762 | 0.04761904762 | 0             |  | inf          | #DIV/0! |
| VAV3    | 0.04761904762 | 0.04761904762 | 0.05555555556 |  | 0.7          | #DIV/0! |
| AV3-AS  | 0.04761904762 | 0.04761904762 | 0.05555555556 |  | 0.7          | #DIV/0! |
| VAX1    | 0.2380952381  | 0.2380952381  | 0             |  | inf          | #DIV/0! |
| VAX2    | 0             | 0             | 0.05555555556 |  | 0            | #DIV/0! |
| VCAM1   | 0.04761904762 | 0.04761904762 | 0.05555555556 |  | 0.7          | #DIV/0! |
| VCAN    | 0.04761904762 | 0.04761904762 | 0.05555555556 |  | 0.7          | #DIV/0! |
| CAN-AS  | 0.04761904762 | 0.04761904762 | 0.05555555556 |  | 0.7          | #DIV/0! |
| VCL     | 0.1904761905  | 0.1904761905  | 0.05555555556 |  | 3.294117647  | #DIV/0! |
| VCP     | 0.09523809524 | 0.09523809524 | 0.05555555556 |  | 1.473684211  | #DIV/0! |
| VCPIP1  | 0.1428571429  | 0.1428571429  | 0.1666666667  |  | 0.6666666667 | #DIV/0! |
| CPKMT   | 0.04761904762 | 0.04761904762 | 0             |  | inf          | #DIV/0! |
| VDAC1   | 0.04761904762 | 0.04761904762 | 0             |  | inf          | #DIV/0! |
| VDAC2   | 0.1904761905  | 0.1904761905  | 0.05555555556 |  | 3.294117647  | #DIV/0! |



|         |               |               |              |  |              |         |
|---------|---------------|---------------|--------------|--|--------------|---------|
| VDAC3   | 0.09523809524 | 0.09523809524 | 0.1666666667 |  | 0.4210526316 | #DIV/0! |
| VDR     | 0.04761904762 | 0.04761904762 | 0.0555555556 |  | 0.7          | #DIV/0! |
| VEGFA   | 0.04761904762 | 0.04761904762 | 0.0555555556 |  | 0.7          | #DIV/0! |
| VEGFC   | 0             | 0             | 0.0555555556 |  | 0            | #DIV/0! |
| VENTX   | 0.1904761905  | 0.1904761905  | 0            |  | inf          | #DIV/0! |
| ENTXP   | 0.04761904762 | 0.04761904762 | 0            |  | inf          | #DIV/0! |
| VEPH1   | 0.1428571429  | 0.1428571429  | 0.0555555556 |  | 2.333333333  | #DIV/0! |
| VEZF1   | 0.09523809524 | 0.09523809524 | 0            |  | inf          | #DIV/0! |
| VEZT    | 0.04761904762 | 0.04761904762 | 0.0555555556 |  | 0.7          | #DIV/0! |
| VGf     | 0.04761904762 | 0.04761904762 | 0.0555555556 |  | 0.7          | #DIV/0! |
| VHL     | 0.09523809524 | 0.09523809524 | 0            |  | inf          | #DIV/0! |
| VIL1    | 0             | 0             | 0.0555555556 |  | 0            | #DIV/0! |
| VILL    | 0.04761904762 | 0.04761904762 | 0            |  | inf          | #DIV/0! |
| VIM     | 0.09523809524 | 0.09523809524 | 0.1111111111 |  | 0.6842105263 | #DIV/0! |
| VIM-AS  | 0.09523809524 | 0.09523809524 | 0.1111111111 |  | 0.6842105263 | #DIV/0! |
| VIPR1   | 0.04761904762 | 0.04761904762 | 0            |  | inf          | #DIV/0! |
| IPR1-AS | 0.04761904762 | 0.04761904762 | 0            |  | inf          | #DIV/0! |
| VIPR2   | 0.1428571429  | 0.1428571429  | 0.0555555556 |  | 2.333333333  | #DIV/0! |
| VIRMA   | 0.1904761905  | 0.1904761905  | 0.1111111111 |  | 1.529411765  | #DIV/0! |
| VIT     | 0             | 0             | 0.0555555556 |  | 0            | #DIV/0! |
| VKORC   | 0.04761904762 | 0.04761904762 | 0            |  | inf          | #DIV/0! |
| KORC11  | 0.04761904762 | 0.04761904762 | 0.1111111111 |  | 0.325        | #DIV/0! |
| VLDLR   | 0.04761904762 | 0.04761904762 | 0.0555555556 |  | 0.7          | #DIV/0! |
| DLR-A   | 0.04761904762 | 0.04761904762 | 0.0555555556 |  | 0.7          | #DIV/0! |
| VMAC    | 0.1428571429  | 0.1428571429  | 0.0555555556 |  | 2.333333333  | #DIV/0! |
| VMO1    | 0             | 0             | 0.1111111111 |  | 0            | #DIV/0! |
| VMP1    | 0.1428571429  | 0.1428571429  | 0            |  | inf          | #DIV/0! |
| VN1R1   | 0.1428571429  | 0.1428571429  | 0.0555555556 |  | 2.333333333  | #DIV/0! |
| VN1R2   | 0.09523809524 | 0.09523809524 | 0.0555555556 |  | 1.473684211  | #DIV/0! |
| VN1R3   | 0.04761904762 | 0.04761904762 | 0            |  | inf          | #DIV/0! |
| VN1R4   | 0.09523809524 | 0.09523809524 | 0.0555555556 |  | 1.473684211  | #DIV/0! |
| VN1R5   | 0.1428571429  | 0.1428571429  | 0            |  | inf          | #DIV/0! |
| VOPPI   | 0.3333333333  | 0.3333333333  | 0.2222222222 |  | 1.375        | #DIV/0! |
| VPREB1  | 0.04761904762 | 0.04761904762 | 0.0555555556 |  | 0.7          | #DIV/0! |
| VPS13A  | 0             | 0             | 0.0555555556 |  | 0            | #DIV/0! |
| PS13A-A | 0             | 0             | 0.0555555556 |  | 0            | #DIV/0! |
| VPS13B  | 0.1904761905  | 0.1904761905  | 0.1111111111 |  | 1.529411765  | #DIV/0! |
| VPS13C  | 0.04761904762 | 0.04761904762 | 0.0555555556 |  | 0.7          | #DIV/0! |
| VPS13D  | 0.04761904762 | 0.04761904762 | 0.1111111111 |  | 0.325        | #DIV/0! |
| VPS16   | 0.1904761905  | 0.1904761905  | 0.0555555556 |  | 3.294117647  | #DIV/0! |
| VPS25   | 0.04761904762 | 0.04761904762 | 0            |  | inf          | #DIV/0! |
| VPS26A  | 0.1904761905  | 0.1904761905  | 0.0555555556 |  | 3.294117647  | #DIV/0! |
| VPS26C  | 0.04761904762 | 0.04761904762 | 0.1666666667 |  | 0.2          | #DIV/0! |
| VPS28   | 0.04761904762 | 0.04761904762 | 0.1666666667 |  | 0.2          | #DIV/0! |
| VPS29   | 0             | 0             | 0.1111111111 |  | 0            | #DIV/0! |
| VPS33A  | 0.04761904762 | 0.04761904762 | 0.1111111111 |  | 0.325        | #DIV/0! |
| VPS33B  | 0.04761904762 | 0.04761904762 | 0.0555555556 |  | 0.7          | #DIV/0! |
| PS33B-D | 0.04761904762 | 0.04761904762 | 0.0555555556 |  | 0.7          | #DIV/0! |
| VPS35   | 0.04761904762 | 0.04761904762 | 0            |  | inf          | #DIV/0! |
| VPS35L  | 0.04761904762 | 0.04761904762 | 0            |  | inf          | #DIV/0! |
| VPS37A  | 0.09523809524 | 0.09523809524 | 0.1111111111 |  | 0.6842105263 | #DIV/0! |

|          |               |               |              |  |              |         |
|----------|---------------|---------------|--------------|--|--------------|---------|
| VPS37B   | 0.04761904762 | 0.04761904762 | 0.1111111111 |  | 0.325        | #DIV/0! |
| VPS37D   | 0.1428571429  | 0.1428571429  | 0.1111111111 |  | 1.083333333  | #DIV/0! |
| VPS41    | 0.04761904762 | 0.04761904762 | 0.2222222222 |  | 0.1375       | #DIV/0! |
| VPS45    | 0.1904761905  | 0.1904761905  | 0.0555555556 |  | 3.294117647  | #DIV/0! |
| VPS4A    | 0.1428571429  | 0.1428571429  | 0.0555555556 |  | 2.333333333  | #DIV/0! |
| VPS4B    | 0.04761904762 | 0.04761904762 | 0            |  | inf          | #DIV/0! |
| VPS50    | 0.04761904762 | 0.04761904762 | 0.1111111111 |  | 0.325        | #DIV/0! |
| VPS53    | 0             | 0             | 0.1111111111 |  | 0            | #DIV/0! |
| VPS54    | 0             | 0             | 0.0555555556 |  | 0            | #DIV/0! |
| VPS72    | 0.1904761905  | 0.1904761905  | 0.0555555556 |  | 3.294117647  | #DIV/0! |
| VPS8     | 0.1428571429  | 0.1428571429  | 0.0555555556 |  | 2.333333333  | #DIV/0! |
| VPS9D1   | 0.09523809524 | 0.09523809524 | 0            |  | inf          | #DIV/0! |
| VPS9D1-A | 0.09523809524 | 0.09523809524 | 0            |  | inf          | #DIV/0! |
| VRK2     | 0.04761904762 | 0.04761904762 | 0.0555555556 |  | 0.7          | #DIV/0! |
| VRK3     | 0.09523809524 | 0.09523809524 | 0.1111111111 |  | 0.6842105263 | #DIV/0! |
| VRTN     | 0.04761904762 | 0.04761904762 | 0            |  | inf          | #DIV/0! |
| VSIG10   | 0             | 0             | 0.0555555556 |  | 0            | #DIV/0! |
| VSIR     | 0.09523809524 | 0.09523809524 | 0            |  | inf          | #DIV/0! |
| VSNL1    | 0             | 0             | 0.0555555556 |  | 0            | #DIV/0! |
| VSTM1    | 0.09523809524 | 0.09523809524 | 0.0555555556 |  | 1.473684211  | #DIV/0! |
| VSTM2A   | 0.380952381   | 0.380952381   | 0.1666666667 |  | 2.461538462  | #DIV/0! |
| VSTM2A-C | 0.380952381   | 0.380952381   | 0.1666666667 |  | 2.461538462  | #DIV/0! |
| VSTM2B   | 0.04761904762 | 0.04761904762 | 0.1666666667 |  | 0.2          | #DIV/0! |
| VSTM2I   | 0.1428571429  | 0.1428571429  | 0.1666666667 |  | 0.6666666667 | #DIV/0! |
| VSTM4    | 0.09523809524 | 0.09523809524 | 0.0555555556 |  | 1.473684211  | #DIV/0! |
| VSX1     | 0.1904761905  | 0.1904761905  | 0.0555555556 |  | 3.294117647  | #DIV/0! |
| VSX2     | 0.04761904762 | 0.04761904762 | 0            |  | inf          | #DIV/0! |
| VTCN1    | 0.04761904762 | 0.04761904762 | 0.0555555556 |  | 0.7          | #DIV/0! |
| VTH1A    | 0.1428571429  | 0.1428571429  | 0.0555555556 |  | 2.333333333  | #DIV/0! |
| VTN      | 0.04761904762 | 0.04761904762 | 0.0555555556 |  | 0.7          | #DIV/0! |
| TRNA1    | 0.04761904762 | 0.04761904762 | 0            |  | inf          | #DIV/0! |
| TRNA1    | 0.04761904762 | 0.04761904762 | 0            |  | inf          | #DIV/0! |
| TRNA1    | 0.04761904762 | 0.04761904762 | 0            |  | inf          | #DIV/0! |
| TRNA2    | 0.04761904762 | 0.04761904762 | 0            |  | inf          | #DIV/0! |
| VWA1     | 0             | 0             | 0.1111111111 |  | 0            | #DIV/0! |
| VWA2     | 0.1904761905  | 0.1904761905  | 0.0555555556 |  | 3.294117647  | #DIV/0! |
| VWA3A    | 0.04761904762 | 0.04761904762 | 0            |  | inf          | #DIV/0! |
| VWA3B    | 0             | 0             | 0.0555555556 |  | 0            | #DIV/0! |
| VWA5B    | 0.04761904762 | 0.04761904762 | 0.1111111111 |  | 0.325        | #DIV/0! |
| VWA5B1   | 0.1428571429  | 0.1428571429  | 0.0555555556 |  | 2.333333333  | #DIV/0! |
| VWA7     | 0.04761904762 | 0.04761904762 | 0            |  | inf          | #DIV/0! |
| VWC2     | 0.09523809524 | 0.09523809524 | 0.2222222222 |  | 0.2894736842 | #DIV/0! |
| VWC2L    | 0             | 0             | 0.0555555556 |  | 0            | #DIV/0! |
| VWC2L-I  | 0             | 0             | 0.0555555556 |  | 0            | #DIV/0! |
| VWDE     | 0.04761904762 | 0.04761904762 | 0.2222222222 |  | 0.1375       | #DIV/0! |
| VWF      | 0.04761904762 | 0.04761904762 | 0.1111111111 |  | 0.325        | #DIV/0! |
| VXN      | 0.1428571429  | 0.1428571429  | 0.1666666667 |  | 0.6666666667 | #DIV/0! |
| WAC      | 0.09523809524 | 0.09523809524 | 0.1111111111 |  | 0.6842105263 | #DIV/0! |
| WAC-AS   | 0.09523809524 | 0.09523809524 | 0.1111111111 |  | 0.6842105263 | #DIV/0! |
| WAPL     | 0.1428571429  | 0.1428571429  | 0.0555555556 |  | 2.333333333  | #DIV/0! |
| WARS2    | 0.04761904762 | 0.04761904762 | 0.0555555556 |  | 0.7          | #DIV/0! |

|        |               |               |               |  |              |         |
|--------|---------------|---------------|---------------|--|--------------|---------|
| ARS2-A | 0.04761904762 | 0.04761904762 | 0.05555555556 |  | 0.7          | #DIV/0! |
| ARS2-I | 0.04761904762 | 0.04761904762 | 0.05555555556 |  | 0.7          | #DIV/0! |
| WASF1  | 0             | 0             | 0             |  |              | #DIV/0! |
| WASF2  | 0.04761904762 | 0.04761904762 | 0.11111111111 |  | 0.325        | #DIV/0! |
| WASH2I | 0             | 0             | 0.05555555556 |  | 0            | #DIV/0! |
| WASH3I | 0.04761904762 | 0.04761904762 | 0.05555555556 |  | 0.7          | #DIV/0! |
| WASH5I | 0.09523809524 | 0.09523809524 | 0.11111111111 |  | 0.6842105263 | #DIV/0! |
| WASH7I | 0.04761904762 | 0.04761904762 | 0.16666666667 |  | 0.2          | #DIV/0! |
| WASH8I | 0.04761904762 | 0.04761904762 | 0.11111111111 |  | 0.325        | #DIV/0! |
| WASHC  | 0.04761904762 | 0.04761904762 | 0.05555555556 |  | 0.7          | #DIV/0! |
| WASHC2 | 0.04761904762 | 0.04761904762 | 0.05555555556 |  | 0.7          | #DIV/0! |
| WASHC2 | 0.1428571429  | 0.1428571429  | 0.05555555556 |  | 2.333333333  | #DIV/0! |
| WASHC  | 0.04761904762 | 0.04761904762 | 0.05555555556 |  | 0.7          | #DIV/0! |
| WASHC  | 0.04761904762 | 0.04761904762 | 0.05555555556 |  | 0.7          | #DIV/0! |
| WASHC  | 0.1428571429  | 0.1428571429  | 0.11111111111 |  | 1.083333333  | #DIV/0! |
| WASIR2 | 0.04761904762 | 0.04761904762 | 0.22222222222 |  | 0.1375       | #DIV/0! |
| WASL   | 0.04761904762 | 0.04761904762 | 0.05555555556 |  | 0.7          | #DIV/0! |
| WBP1   | 0             | 0             | 0.05555555556 |  | 0            | #DIV/0! |
| WBP11  | 0.04761904762 | 0.04761904762 | 0.11111111111 |  | 0.325        | #DIV/0! |
| WBP11P | 0.09523809524 | 0.09523809524 | 0             |  | inf          | #DIV/0! |
| WBP1L  | 0.1428571429  | 0.1428571429  | 0.05555555556 |  | 2.333333333  | #DIV/0! |
| WBP2   | 0.04761904762 | 0.04761904762 | 0             |  | inf          | #DIV/0! |
| WBP2NI | 0             | 0             | 0.11111111111 |  | 0            | #DIV/0! |
| WDFY1  | 0             | 0             | 0.05555555556 |  | 0            | #DIV/0! |
| WDFY3  | 0             | 0             | 0.05555555556 |  | 0            | #DIV/0! |
| DFY3-A | 0             | 0             | 0.05555555556 |  | 0            | #DIV/0! |
| WDFY4  | 0.09523809524 | 0.09523809524 | 0.05555555556 |  | 1.473684211  | #DIV/0! |
| WDHD1  | 0.04761904762 | 0.04761904762 | 0             |  | inf          | #DIV/0! |
| WDPCP  | 0             | 0             | 0.05555555556 |  | 0            | #DIV/0! |
| WDR11  | 0.2380952381  | 0.2380952381  | 0             |  | inf          | #DIV/0! |
| DR11-A | 0.2380952381  | 0.2380952381  | 0             |  | inf          | #DIV/0! |
| WDR12  | 0.09523809524 | 0.09523809524 | 0.05555555556 |  | 1.473684211  | #DIV/0! |
| WDR17  | 0             | 0             | 0.05555555556 |  | 0            | #DIV/0! |
| WDR18  | 0.09523809524 | 0.09523809524 | 0.11111111111 |  | 0.6842105263 | #DIV/0! |
| WDR19  | 0.1904761905  | 0.1904761905  | 0.05555555556 |  | 3.294117647  | #DIV/0! |
| WDR24  | 0.04761904762 | 0.04761904762 | 0.22222222222 |  | 0.1375       | #DIV/0! |
| WDR26  | 0.1428571429  | 0.1428571429  | 0.05555555556 |  | 2.333333333  | #DIV/0! |
| WDR3   | 0.04761904762 | 0.04761904762 | 0.05555555556 |  | 0.7          | #DIV/0! |
| WDR31  | 0.04761904762 | 0.04761904762 | 0.05555555556 |  | 0.7          | #DIV/0! |
| WDR33  | 0             | 0             | 0.05555555556 |  | 0            | #DIV/0! |
| WDR34  | 0.09523809524 | 0.09523809524 | 0.05555555556 |  | 1.473684211  | #DIV/0! |
| WDR35  | 0             | 0             | 0.05555555556 |  | 0            | #DIV/0! |
| WDR36  | 0.04761904762 | 0.04761904762 | 0             |  | inf          | #DIV/0! |
| WDR37  | 0.04761904762 | 0.04761904762 | 0.11111111111 |  | 0.325        | #DIV/0! |
| WDR38  | 0.09523809524 | 0.09523809524 | 0.05555555556 |  | 1.473684211  | #DIV/0! |
| WDR4   | 0.04761904762 | 0.04761904762 | 0.16666666667 |  | 0.2          | #DIV/0! |
| WDR41  | 0.04761904762 | 0.04761904762 | 0             |  | inf          | #DIV/0! |
| WDR43  | 0             | 0             | 0.05555555556 |  | 0            | #DIV/0! |
| WDR45E | 0             | 0             | 0             |  |              | #DIV/0! |
| WDR47  | 0.04761904762 | 0.04761904762 | 0.05555555556 |  | 0.7          | #DIV/0! |
| WDR48  | 0.04761904762 | 0.04761904762 | 0             |  | inf          | #DIV/0! |

|         |               |               |               |  |              |         |
|---------|---------------|---------------|---------------|--|--------------|---------|
| WDR49   | 0.1428571429  | 0.1428571429  | 0.05555555556 |  | 2.333333333  | #DIV/0! |
| WDR5    | 0.04761904762 | 0.04761904762 | 0             |  | inf          | #DIV/0! |
| WDR53   | 0.1428571429  | 0.1428571429  | 0.05555555556 |  | 2.333333333  | #DIV/0! |
| WDR54   | 0             | 0             | 0.05555555556 |  | 0            | #DIV/0! |
| WDR55   | 0.04761904762 | 0.04761904762 | 0             |  | inf          | #DIV/0! |
| WDR59   | 0.04761904762 | 0.04761904762 | 0             |  | inf          | #DIV/0! |
| WDR5B   | 0.09523809524 | 0.09523809524 | 0.05555555556 |  | 1.473684211  | #DIV/0! |
| WDR6    | 0.09523809524 | 0.09523809524 | 0             |  | inf          | #DIV/0! |
| WDR60   | 0.1428571429  | 0.1428571429  | 0.05555555556 |  | 2.333333333  | #DIV/0! |
| WDR61   | 0.04761904762 | 0.04761904762 | 0.05555555556 |  | 0.7          | #DIV/0! |
| WDR62   | 0.04761904762 | 0.04761904762 | 0.05555555556 |  | 0.7          | #DIV/0! |
| WDR63   | 0.04761904762 | 0.04761904762 | 0.05555555556 |  | 0.7          | #DIV/0! |
| WDR64   | 0.1428571429  | 0.1428571429  | 0             |  | inf          | #DIV/0! |
| WDR66   | 0.04761904762 | 0.04761904762 | 0.1111111111  |  | 0.325        | #DIV/0! |
| WDR7    | 0.09523809524 | 0.09523809524 | 0             |  | inf          | #DIV/0! |
| WDR70   | 0.09523809524 | 0.09523809524 | 0.05555555556 |  | 1.473684211  | #DIV/0! |
| WDR72   | 0.04761904762 | 0.04761904762 | 0.05555555556 |  | 0.7          | #DIV/0! |
| WDR73   | 0.04761904762 | 0.04761904762 | 0.05555555556 |  | 0.7          | #DIV/0! |
| WDR75   | 0             | 0             | 0.1666666667  |  | 0            | #DIV/0! |
| WDR77   | 0.04761904762 | 0.04761904762 | 0             |  | inf          | #DIV/0! |
| WDR78   | 0.04761904762 | 0.04761904762 | 0.05555555556 |  | 0.7          | #DIV/0! |
| WDR81   | 0             | 0             | 0.1111111111  |  | 0            | #DIV/0! |
| WDR83   | 0.1428571429  | 0.1428571429  | 0.1111111111  |  | 1.083333333  | #DIV/0! |
| WDR83O  | 0.1428571429  | 0.1428571429  | 0.1111111111  |  | 1.083333333  | #DIV/0! |
| WDR86   | 0.09523809524 | 0.09523809524 | 0.05555555556 |  | 1.473684211  | #DIV/0! |
| WDR86-A | 0.09523809524 | 0.09523809524 | 0.05555555556 |  | 1.473684211  | #DIV/0! |
| WDR87   | 0.04761904762 | 0.04761904762 | 0.05555555556 |  | 0.7          | #DIV/0! |
| WDR88   | 0.04761904762 | 0.04761904762 | 0.05555555556 |  | 0.7          | #DIV/0! |
| WDR89   | 0.09523809524 | 0.09523809524 | 0             |  | inf          | #DIV/0! |
| WDR90   | 0.04761904762 | 0.04761904762 | 0.2222222222  |  | 0.1375       | #DIV/0! |
| WDR91   | 0.04761904762 | 0.04761904762 | 0.05555555556 |  | 0.7          | #DIV/0! |
| WDR92   | 0             | 0             | 0.05555555556 |  | 0            | #DIV/0! |
| WDR93   | 0.04761904762 | 0.04761904762 | 0.05555555556 |  | 0.7          | #DIV/0! |
| WDR97   | 0.04761904762 | 0.04761904762 | 0.1666666667  |  | 0.2          | #DIV/0! |
| WDSUB1  | 0             | 0             | 0.05555555556 |  | 0            | #DIV/0! |
| WDTC1   | 0.04761904762 | 0.04761904762 | 0.1111111111  |  | 0.325        | #DIV/0! |
| VDYHV   | 0.1428571429  | 0.1428571429  | 0.1111111111  |  | 1.083333333  | #DIV/0! |
| WEE1    | 0.04761904762 | 0.04761904762 | 0.05555555556 |  | 0.7          | #DIV/0! |
| WEE2    | 0.04761904762 | 0.04761904762 | 0.1111111111  |  | 0.325        | #DIV/0! |
| WEE2-AS | 0.04761904762 | 0.04761904762 | 0.1111111111  |  | 0.325        | #DIV/0! |
| WFDC1   | 0.04761904762 | 0.04761904762 | 0             |  | inf          | #DIV/0! |
| WFDC10  | 0.1428571429  | 0.1428571429  | 0.1666666667  |  | 0.6666666667 | #DIV/0! |
| WFDC10  | 0.1428571429  | 0.1428571429  | 0.1666666667  |  | 0.6666666667 | #DIV/0! |
| WFDC11  | 0.1428571429  | 0.1428571429  | 0.1666666667  |  | 0.6666666667 | #DIV/0! |
| WFDC12  | 0.1428571429  | 0.1428571429  | 0.1666666667  |  | 0.6666666667 | #DIV/0! |
| WFDC13  | 0.1428571429  | 0.1428571429  | 0.1666666667  |  | 0.6666666667 | #DIV/0! |
| WFDC2   | 0.1428571429  | 0.1428571429  | 0.1666666667  |  | 0.6666666667 | #DIV/0! |
| WFDC21  | 0.1428571429  | 0.1428571429  | 0             |  | inf          | #DIV/0! |
| WFDC3   | 0.1428571429  | 0.1428571429  | 0.1666666667  |  | 0.6666666667 | #DIV/0! |
| WFDC5   | 0.1428571429  | 0.1428571429  | 0.1666666667  |  | 0.6666666667 | #DIV/0! |
| WFDC6   | 0.1428571429  | 0.1428571429  | 0.1666666667  |  | 0.6666666667 | #DIV/0! |

|        |               |               |              |  |              |         |
|--------|---------------|---------------|--------------|--|--------------|---------|
| WFDC8  | 0.1428571429  | 0.1428571429  | 0.1666666667 |  | 0.6666666667 | #DIV/0! |
| WFDC9  | 0.1428571429  | 0.1428571429  | 0.1666666667 |  | 0.6666666667 | #DIV/0! |
| VFIKKN | 0.04761904762 | 0.04761904762 | 0.2222222222 |  | 0.1375       | #DIV/0! |
| VFIKKN | 0.09523809524 | 0.09523809524 | 0            |  | inf          | #DIV/0! |
| VHAMM  | 0.04761904762 | 0.04761904762 | 0.0555555556 |  | 0.7          | #DIV/0! |
| HAMM   | 0.09523809524 | 0.09523809524 | 0            |  | inf          | #DIV/0! |
| WHRN   | 0.04761904762 | 0.04761904762 | 0.0555555556 |  | 0.7          | #DIV/0! |
| WIF1   | 0.09523809524 | 0.09523809524 | 0.0555555556 |  | 1.473684211  | #DIV/0! |
| WIPF1  | 0             | 0             | 0.1111111111 |  | 0            | #DIV/0! |
| WIPF2  | 0.09523809524 | 0.09523809524 | 0            |  | inf          | #DIV/0! |
| WIPF3  | 0.04761904762 | 0.04761904762 | 0.1666666667 |  | 0.2          | #DIV/0! |
| WIPI1  | 0             | 0             | 0            |  |              | #DIV/0! |
| WIPI2  | 0.04761904762 | 0.04761904762 | 0.1666666667 |  | 0.2          | #DIV/0! |
| WLS    | 0.04761904762 | 0.04761904762 | 0.0555555556 |  | 0.7          | #DIV/0! |
| WNK1   | 0.04761904762 | 0.04761904762 | 0.1111111111 |  | 0.325        | #DIV/0! |
| WNK2   | 0.04761904762 | 0.04761904762 | 0.0555555556 |  | 0.7          | #DIV/0! |
| WNK4   | 0.04761904762 | 0.04761904762 | 0            |  | inf          | #DIV/0! |
| WNT1   | 0.04761904762 | 0.04761904762 | 0.0555555556 |  | 0.7          | #DIV/0! |
| WNT10A | 0             | 0             | 0.0555555556 |  | 0            | #DIV/0! |
| WNT10B | 0.04761904762 | 0.04761904762 | 0.0555555556 |  | 0.7          | #DIV/0! |
| WNT16  | 0.04761904762 | 0.04761904762 | 0.0555555556 |  | 0.7          | #DIV/0! |
| WNT2   | 0.09523809524 | 0.09523809524 | 0.0555555556 |  | 1.473684211  | #DIV/0! |
| WNT2B  | 0.04761904762 | 0.04761904762 | 0.0555555556 |  | 0.7          | #DIV/0! |
| WNT3   | 0.1428571429  | 0.1428571429  | 0            |  | inf          | #DIV/0! |
| WNT3A  | 0.1428571429  | 0.1428571429  | 0            |  | inf          | #DIV/0! |
| WNT4   | 0.04761904762 | 0.04761904762 | 0.1111111111 |  | 0.325        | #DIV/0! |
| WNT5A  | 0.04761904762 | 0.04761904762 | 0            |  | inf          | #DIV/0! |
| WNT5B  | 0.04761904762 | 0.04761904762 | 0.1111111111 |  | 0.325        | #DIV/0! |
| WNT6   | 0             | 0             | 0.0555555556 |  | 0            | #DIV/0! |
| WNT7A  | 0.04761904762 | 0.04761904762 | 0            |  | inf          | #DIV/0! |
| WNT7B  | 0             | 0             | 0.1111111111 |  | 0            | #DIV/0! |
| WNT8A  | 0.04761904762 | 0.04761904762 | 0            |  | inf          | #DIV/0! |
| WNT8B  | 0.1428571429  | 0.1428571429  | 0            |  | inf          | #DIV/0! |
| WNT9A  | 0.1428571429  | 0.1428571429  | 0            |  | inf          | #DIV/0! |
| WNT9B  | 0.1428571429  | 0.1428571429  | 0            |  | inf          | #DIV/0! |
| WRAP53 | 0             | 0             | 0.0555555556 |  | 0            | #DIV/0! |
| WRAP73 | 0             | 0             | 0.0555555556 |  | 0            | #DIV/0! |
| WRB    | 0.04761904762 | 0.04761904762 | 0.1111111111 |  | 0.325        | #DIV/0! |
| B-SH3B | 0.04761904762 | 0.04761904762 | 0.1111111111 |  | 0.325        | #DIV/0! |
| WRN    | 0.04761904762 | 0.04761904762 | 0.1111111111 |  | 0.325        | #DIV/0! |
| WSB1   | 0.04761904762 | 0.04761904762 | 0.0555555556 |  | 0.7          | #DIV/0! |
| WSB2   | 0             | 0             | 0.0555555556 |  | 0            | #DIV/0! |
| WSCD1  | 0             | 0             | 0.0555555556 |  | 0            | #DIV/0! |
| WSCD2  | 0.04761904762 | 0.04761904762 | 0.0555555556 |  | 0.7          | #DIV/0! |
| WSPAR  | 0.04761904762 | 0.04761904762 | 0            |  | inf          | #DIV/0! |
| WTIP   | 0.04761904762 | 0.04761904762 | 0.0555555556 |  | 0.7          | #DIV/0! |
| WWC1   | 0             | 0             | 0.0555555556 |  | 0            | #DIV/0! |
| WWC2   | 0             | 0             | 0.0555555556 |  | 0            | #DIV/0! |
| WC2-A5 | 0             | 0             | 0.0555555556 |  | 0            | #DIV/0! |
| WC2-A5 | 0             | 0             | 0.0555555556 |  | 0            | #DIV/0! |
| WWOX   | 0.09523809524 | 0.09523809524 | 0            |  | inf          | #DIV/0! |

|         |               |               |              |  |              |         |
|---------|---------------|---------------|--------------|--|--------------|---------|
| WWP1    | 0.1904761905  | 0.1904761905  | 0.1111111111 |  | 1.529411765  | #DIV/0! |
| WWP2    | 0.1428571429  | 0.1428571429  | 0.0555555556 |  | 2.333333333  | #DIV/0! |
| WWTRI   | 0.1904761905  | 0.1904761905  | 0.1111111111 |  | 1.529411765  | #DIV/0! |
| WTRI-A  | 0.1904761905  | 0.1904761905  | 0.1111111111 |  | 1.529411765  | #DIV/0! |
| XAB2    | 0.1428571429  | 0.1428571429  | 0.0555555556 |  | 2.333333333  | #DIV/0! |
| XAF1    | 0             | 0             | 0.0555555556 |  | 0            | #DIV/0! |
| XBP1    | 0.04761904762 | 0.04761904762 | 0.1111111111 |  | 0.325        | #DIV/0! |
| XCL1    | 0.1428571429  | 0.1428571429  | 0            |  | inf          | #DIV/0! |
| XCL2    | 0.1428571429  | 0.1428571429  | 0            |  | inf          | #DIV/0! |
| XDH     | 0             | 0             | 0.0555555556 |  | 0            | #DIV/0! |
| XIRP1   | 0.04761904762 | 0.04761904762 | 0            |  | inf          | #DIV/0! |
| XIRP2   | 0             | 0             | 0.0555555556 |  | 0            | #DIV/0! |
| IRP2-AS | 0             | 0             | 0.0555555556 |  | 0            | #DIV/0! |
| XKR3    | 0.04761904762 | 0.04761904762 | 0            |  | inf          | #DIV/0! |
| XKR4    | 0.1428571429  | 0.1428571429  | 0.1111111111 |  | 1.083333333  | #DIV/0! |
| XKR5    | 0.09523809524 | 0.09523809524 | 0.1111111111 |  | 0.6842105263 | #DIV/0! |
| XKR6    | 0.09523809524 | 0.09523809524 | 0.1111111111 |  | 0.6842105263 | #DIV/0! |
| XKR7    | 0.09523809524 | 0.09523809524 | 0.1111111111 |  | 0.6842105263 | #DIV/0! |
| XKR8    | 0.04761904762 | 0.04761904762 | 0.1111111111 |  | 0.325        | #DIV/0! |
| XKR9    | 0.1904761905  | 0.1904761905  | 0.1666666667 |  | 0.9411764706 | #DIV/0! |
| OC_007  | 0.09523809524 | 0.09523809524 | 0.0555555556 |  | 1.473684211  | #DIV/0! |
| OC_008  | 0.1428571429  | 0.1428571429  | 0.1111111111 |  | 1.083333333  | #DIV/0! |
| OC_009  | 0.04761904762 | 0.04761904762 | 0.1111111111 |  | 0.325        | #DIV/0! |
| XPA     | 0.04761904762 | 0.04761904762 | 0            |  | inf          | #DIV/0! |
| XPC     | 0.04761904762 | 0.04761904762 | 0            |  | inf          | #DIV/0! |
| PNPEP   | 0.1428571429  | 0.1428571429  | 0.0555555556 |  | 2.333333333  | #DIV/0! |
| PNPEP   | 0             | 0             | 0.1111111111 |  | 0            | #DIV/0! |
| XPO1    | 0.04761904762 | 0.04761904762 | 0.0555555556 |  | 0.7          | #DIV/0! |
| XPO4    | 0.04761904762 | 0.04761904762 | 0            |  | inf          | #DIV/0! |
| XPO5    | 0.04761904762 | 0.04761904762 | 0.0555555556 |  | 0.7          | #DIV/0! |
| XPO6    | 0.04761904762 | 0.04761904762 | 0            |  | inf          | #DIV/0! |
| XPO7    | 0.09523809524 | 0.09523809524 | 0.1111111111 |  | 0.6842105263 | #DIV/0! |
| XPOT    | 0.1428571429  | 0.1428571429  | 0.0555555556 |  | 2.333333333  | #DIV/0! |
| XPR1    | 0.1428571429  | 0.1428571429  | 0            |  | inf          | #DIV/0! |
| XRCC1   | 0.09523809524 | 0.09523809524 | 0.0555555556 |  | 1.473684211  | #DIV/0! |
| XRCC2   | 0.09523809524 | 0.09523809524 | 0.0555555556 |  | 1.473684211  | #DIV/0! |
| XRCC4   | 0.04761904762 | 0.04761904762 | 0.0555555556 |  | 0.7          | #DIV/0! |
| XRCC5   | 0             | 0             | 0.0555555556 |  | 0            | #DIV/0! |
| XRCC6   | 0             | 0             | 0.1111111111 |  | 0            | #DIV/0! |
| XRN1    | 0.2380952381  | 0.2380952381  | 0.0555555556 |  | 4.375        | #DIV/0! |
| XRN2    | 0.1904761905  | 0.1904761905  | 0.0555555556 |  | 3.294117647  | #DIV/0! |
| XYLT1   | 0.1428571429  | 0.1428571429  | 0.0555555556 |  | 2.333333333  | #DIV/0! |
| YLT1-A  | 0.09523809524 | 0.09523809524 | 0.0555555556 |  | 1.473684211  | #DIV/0! |
| YLT1-A  | 0.09523809524 | 0.09523809524 | 0.0555555556 |  | 1.473684211  | #DIV/0! |
| XYLB    | 0.04761904762 | 0.04761904762 | 0            |  | inf          | #DIV/0! |
| XYLT1   | 0.04761904762 | 0.04761904762 | 0            |  | inf          | #DIV/0! |
| XYLT2   | 0.09523809524 | 0.09523809524 | 0            |  | inf          | #DIV/0! |
| YAE1    | 0.04761904762 | 0.04761904762 | 0.2222222222 |  | 0.1375       | #DIV/0! |
| YAF2    | 0.04761904762 | 0.04761904762 | 0.1111111111 |  | 0.325        | #DIV/0! |
| YARS    | 0.04761904762 | 0.04761904762 | 0.1111111111 |  | 0.325        | #DIV/0! |
| YARS2   | 0.1428571429  | 0.1428571429  | 0.1111111111 |  | 1.083333333  | #DIV/0! |

|          |               |               |               |  |              |         |
|----------|---------------|---------------|---------------|--|--------------|---------|
| YBEY     | 0.04761904762 | 0.04761904762 | 0.1111111111  |  | 0.325        | #DIV/0! |
| YBX1     | 0.04761904762 | 0.04761904762 | 0.05555555556 |  | 0.7          | #DIV/0! |
| YBX2     | 0             | 0             | 0.05555555556 |  | 0            | #DIV/0! |
| YBX3     | 0.04761904762 | 0.04761904762 | 0.1111111111  |  | 0.325        | #DIV/0! |
| YBX3P1   | 0.04761904762 | 0.04761904762 | 0             |  | inf          | #DIV/0! |
| YDJC     | 0.04761904762 | 0.04761904762 | 0.05555555556 |  | 0.7          | #DIV/0! |
| YEATS2   | 0.1904761905  | 0.1904761905  | 0.05555555556 |  | 3.294117647  | #DIV/0! |
| YEATS2-A | 0.1904761905  | 0.1904761905  | 0.05555555556 |  | 3.294117647  | #DIV/0! |
| YEATS4   | 0.09523809524 | 0.09523809524 | 0.1111111111  |  | 0.6842105263 | #DIV/0! |
| YES1     | 0.09523809524 | 0.09523809524 | 0             |  | inf          | #DIV/0! |
| YIF1B    | 0.04761904762 | 0.04761904762 | 0.05555555556 |  | 0.7          | #DIV/0! |
| YIPF1    | 0.04761904762 | 0.04761904762 | 0.05555555556 |  | 0.7          | #DIV/0! |
| YIPF2    | 0.1428571429  | 0.1428571429  | 0.1111111111  |  | 1.083333333  | #DIV/0! |
| YIPF3    | 0.04761904762 | 0.04761904762 | 0.05555555556 |  | 0.7          | #DIV/0! |
| YIPF4    | 0.1428571429  | 0.1428571429  | 0             |  | inf          | #DIV/0! |
| YIPF7    | 0.04761904762 | 0.04761904762 | 0.05555555556 |  | 0.7          | #DIV/0! |
| YJEFN3   | 0.1428571429  | 0.1428571429  | 0.1111111111  |  | 1.083333333  | #DIV/0! |
| YJU2     | 0.09523809524 | 0.09523809524 | 0.05555555556 |  | 1.473684211  | #DIV/0! |
| YKT6     | 0.04761904762 | 0.04761904762 | 0.1666666667  |  | 0.2          | #DIV/0! |
| YME1L1   | 0.09523809524 | 0.09523809524 | 0.1111111111  |  | 0.6842105263 | #DIV/0! |
| YOD1     | 0.1428571429  | 0.1428571429  | 0             |  | inf          | #DIV/0! |
| YPEL1    | 0.04761904762 | 0.04761904762 | 0.05555555556 |  | 0.7          | #DIV/0! |
| YPEL2    | 0.1428571429  | 0.1428571429  | 0             |  | inf          | #DIV/0! |
| YPEL3    | 0.04761904762 | 0.04761904762 | 0             |  | inf          | #DIV/0! |
| YPEL5    | 0             | 0             | 0.05555555556 |  | 0            | #DIV/0! |
| YRDC     | 0.04761904762 | 0.04761904762 | 0.05555555556 |  | 0.7          | #DIV/0! |
| YTHDC    | 0.04761904762 | 0.04761904762 | 0.05555555556 |  | 0.7          | #DIV/0! |
| YTHDC2   | 0.04761904762 | 0.04761904762 | 0             |  | inf          | #DIV/0! |
| YTHDF1   | 0.1428571429  | 0.1428571429  | 0.2222222222  |  | 0.4583333333 | #DIV/0! |
| YTHDF2   | 0.04761904762 | 0.04761904762 | 0.1111111111  |  | 0.325        | #DIV/0! |
| YTHDF3   | 0.1428571429  | 0.1428571429  | 0.1666666667  |  | 0.6666666667 | #DIV/0! |
| HDF3-A   | 0.1428571429  | 0.1428571429  | 0.1666666667  |  | 0.6666666667 | #DIV/0! |
| YWHAB    | 0.1428571429  | 0.1428571429  | 0.1666666667  |  | 0.6666666667 | #DIV/0! |
| YWHAE    | 0             | 0             | 0.1111111111  |  | 0            | #DIV/0! |
| YWHAEF   | 0.04761904762 | 0.04761904762 | 0.05555555556 |  | 0.7          | #DIV/0! |
| YWHAG    | 0.09523809524 | 0.09523809524 | 0.1111111111  |  | 0.6842105263 | #DIV/0! |
| YWHAH    | 0.04761904762 | 0.04761904762 | 0.1111111111  |  | 0.325        | #DIV/0! |
| YWHAQ    | 0             | 0             | 0.05555555556 |  | 0            | #DIV/0! |
| YWHAZ    | 0.1904761905  | 0.1904761905  | 0.1111111111  |  | 1.529411765  | #DIV/0! |
| YY1AP1   | 0.1904761905  | 0.1904761905  | 0.1111111111  |  | 1.529411765  | #DIV/0! |
| YY1P2    | 0             | 0             | 0.05555555556 |  | 0            | #DIV/0! |
| ZACN     | 0.04761904762 | 0.04761904762 | 0             |  | inf          | #DIV/0! |
| ZADH2    | 0.09523809524 | 0.09523809524 | 0             |  | inf          | #DIV/0! |
| ZAN      | 0.04761904762 | 0.04761904762 | 0.05555555556 |  | 0.7          | #DIV/0! |
| ZAP70    | 0             | 0             | 0.05555555556 |  | 0            | #DIV/0! |
| ZAR1     | 0.04761904762 | 0.04761904762 | 0.1111111111  |  | 0.325        | #DIV/0! |
| ZASP     | 0.04761904762 | 0.04761904762 | 0.05555555556 |  | 0.7          | #DIV/0! |
| ZBBX     | 0.1428571429  | 0.1428571429  | 0.05555555556 |  | 2.333333333  | #DIV/0! |
| ZBED2    | 0.09523809524 | 0.09523809524 | 0.05555555556 |  | 1.473684211  | #DIV/0! |
| ZBED3    | 0.04761904762 | 0.04761904762 | 0             |  | inf          | #DIV/0! |
| ZBED3-A  | 0.04761904762 | 0.04761904762 | 0             |  | inf          | #DIV/0! |

|          |               |               |               |  |              |         |
|----------|---------------|---------------|---------------|--|--------------|---------|
| ZBED4    | 0             | 0             | 0.1111111111  |  | 0            | #DIV/0! |
| ZBED6    | 0.2380952381  | 0.2380952381  | 0             |  | inf          | #DIV/0! |
| BED6C    | 0.09523809524 | 0.09523809524 | 0.05555555556 |  | 1.473684211  | #DIV/0! |
| ZBED8    | 0.04761904762 | 0.04761904762 | 0.05555555556 |  | 0.7          | #DIV/0! |
| ZBP1     | 0.1428571429  | 0.1428571429  | 0.2222222222  |  | 0.4583333333 | #DIV/0! |
| ZBTB1    | 0.09523809524 | 0.09523809524 | 0             |  | inf          | #DIV/0! |
| ZBTB10   | 0.1428571429  | 0.1428571429  | 0.1111111111  |  | 1.083333333  | #DIV/0! |
| ZBTB11   | 0.09523809524 | 0.09523809524 | 0.05555555556 |  | 1.473684211  | #DIV/0! |
| ZBTB11-A | 0.09523809524 | 0.09523809524 | 0.05555555556 |  | 1.473684211  | #DIV/0! |
| ZBTB12   | 0.04761904762 | 0.04761904762 | 0             |  | inf          | #DIV/0! |
| ZBTB14   | 0.09523809524 | 0.09523809524 | 0             |  | inf          | #DIV/0! |
| ZBTB17   | 0.04761904762 | 0.04761904762 | 0.1111111111  |  | 0.325        | #DIV/0! |
| ZBTB18   | 0.1428571429  | 0.1428571429  | 0.05555555556 |  | 2.333333333  | #DIV/0! |
| ZBTB20   | 0.09523809524 | 0.09523809524 | 0.05555555556 |  | 1.473684211  | #DIV/0! |
| ZBTB20-A | 0.09523809524 | 0.09523809524 | 0.05555555556 |  | 1.473684211  | #DIV/0! |
| ZBTB20-A | 0.09523809524 | 0.09523809524 | 0.05555555556 |  | 1.473684211  | #DIV/0! |
| ZBTB20-A | 0.09523809524 | 0.09523809524 | 0.05555555556 |  | 1.473684211  | #DIV/0! |
| ZBTB21   | 0.04761904762 | 0.04761904762 | 0.1111111111  |  | 0.325        | #DIV/0! |
| ZBTB22   | 0.04761904762 | 0.04761904762 | 0             |  | inf          | #DIV/0! |
| ZBTB24   | 0             | 0             | 0             |  |              | #DIV/0! |
| ZBTB25   | 0.09523809524 | 0.09523809524 | 0             |  | inf          | #DIV/0! |
| ZBTB26   | 0.09523809524 | 0.09523809524 | 0.05555555556 |  | 1.473684211  | #DIV/0! |
| ZBTB32   | 0.04761904762 | 0.04761904762 | 0.05555555556 |  | 0.7          | #DIV/0! |
| ZBTB34   | 0.09523809524 | 0.09523809524 | 0.05555555556 |  | 1.473684211  | #DIV/0! |
| ZBTB37   | 0.1428571429  | 0.1428571429  | 0             |  | inf          | #DIV/0! |
| ZBTB38   | 0.1904761905  | 0.1904761905  | 0.05555555556 |  | 3.294117647  | #DIV/0! |
| ZBTB39   | 0.1428571429  | 0.1428571429  | 0.05555555556 |  | 2.333333333  | #DIV/0! |
| ZBTB4    | 0             | 0             | 0.05555555556 |  | 0            | #DIV/0! |
| ZBTB40   | 0.04761904762 | 0.04761904762 | 0.1111111111  |  | 0.325        | #DIV/0! |
| ZBTB41   | 0.1428571429  | 0.1428571429  | 0             |  | inf          | #DIV/0! |
| ZBTB43   | 0.09523809524 | 0.09523809524 | 0.05555555556 |  | 1.473684211  | #DIV/0! |
| ZBTB45   | 0.1428571429  | 0.1428571429  | 0.05555555556 |  | 2.333333333  | #DIV/0! |
| ZBTB46   | 0.1428571429  | 0.1428571429  | 0.2222222222  |  | 0.4583333333 | #DIV/0! |
| ZBTB46-A | 0.1428571429  | 0.1428571429  | 0.2222222222  |  | 0.4583333333 | #DIV/0! |
| ZBTB47   | 0.04761904762 | 0.04761904762 | 0             |  | inf          | #DIV/0! |
| ZBTB48   | 0             | 0             | 0.05555555556 |  | 0            | #DIV/0! |
| ZBTB5    | 0.09523809524 | 0.09523809524 | 0.05555555556 |  | 1.473684211  | #DIV/0! |
| ZBTB6    | 0.09523809524 | 0.09523809524 | 0.05555555556 |  | 1.473684211  | #DIV/0! |
| ZBTB7A   | 0.09523809524 | 0.09523809524 | 0.05555555556 |  | 1.473684211  | #DIV/0! |
| ZBTB7B   | 0.1904761905  | 0.1904761905  | 0.1111111111  |  | 1.529411765  | #DIV/0! |
| ZBTB7C   | 0.04761904762 | 0.04761904762 | 0.05555555556 |  | 0.7          | #DIV/0! |
| ZBTB8A   | 0.04761904762 | 0.04761904762 | 0.1111111111  |  | 0.325        | #DIV/0! |
| ZBTB8B   | 0.04761904762 | 0.04761904762 | 0.1111111111  |  | 0.325        | #DIV/0! |
| ZBTB8O   | 0.04761904762 | 0.04761904762 | 0.1111111111  |  | 0.325        | #DIV/0! |
| ZBTB9    | 0.04761904762 | 0.04761904762 | 0             |  | inf          | #DIV/0! |
| ZC2H1    | 0.1428571429  | 0.1428571429  | 0.1111111111  |  | 1.083333333  | #DIV/0! |
| ZC3H10   | 0.09523809524 | 0.09523809524 | 0.05555555556 |  | 1.473684211  | #DIV/0! |
| ZC3H11   | 0.2380952381  | 0.2380952381  | 0             |  | inf          | #DIV/0! |
| ZC3H11   | 0.1428571429  | 0.1428571429  | 0.05555555556 |  | 2.333333333  | #DIV/0! |
| ZC3H12   | 0.04761904762 | 0.04761904762 | 0.05555555556 |  | 0.7          | #DIV/0! |



|          |               |               |               |  |              |         |
|----------|---------------|---------------|---------------|--|--------------|---------|
| ZC3H12I  | 0             | 0             | 0             |  |              | #DIV/0! |
| ZC3H15   | 0             | 0             | 0.05555555556 |  | 0            | #DIV/0! |
| ZC3H18   | 0.1428571429  | 0.1428571429  | 0             |  | inf          | #DIV/0! |
| ZC3H18-A | 0.1428571429  | 0.1428571429  | 0             |  | inf          | #DIV/0! |
| ZC3H3    | 0.04761904762 | 0.04761904762 | 0.1111111111  |  | 0.325        | #DIV/0! |
| ZC3H4    | 0.09523809524 | 0.09523809524 | 0.1111111111  |  | 0.6842105263 | #DIV/0! |
| ZC3H6    | 0             | 0             | 0.05555555556 |  | 0            | #DIV/0! |
| ZC3H7A   | 0.04761904762 | 0.04761904762 | 0             |  | inf          | #DIV/0! |
| ZC3H7B   | 0             | 0             | 0.1111111111  |  | 0            | #DIV/0! |
| ZC3H8    | 0             | 0             | 0.05555555556 |  | 0            | #DIV/0! |
| ZC3HAV0  | 0.04761904762 | 0.04761904762 | 0.05555555556 |  | 0.7          | #DIV/0! |
| ZC3HAV1  | 0.04761904762 | 0.04761904762 | 0.05555555556 |  | 0.7          | #DIV/0! |
| ZC3HC1   | 0.04761904762 | 0.04761904762 | 0.05555555556 |  | 0.7          | #DIV/0! |
| ZCCHC1   | 0.04761904762 | 0.04761904762 | 0             |  | inf          | #DIV/0! |
| ZCCHC1   | 0.04761904762 | 0.04761904762 | 0             |  | inf          | #DIV/0! |
| ZCCHC1   | 0.04761904762 | 0.04761904762 | 0.1111111111  |  | 0.325        | #DIV/0! |
| ZCCHC2   | 0.09523809524 | 0.09523809524 | 0             |  | inf          | #DIV/0! |
| ZCCHC2   | 0             | 0             | 0.05555555556 |  | 0            | #DIV/0! |
| ZCCHC2   | 0.1428571429  | 0.1428571429  | 0.05555555556 |  | 2.333333333  | #DIV/0! |
| ZCCHC3   | 0.1904761905  | 0.1904761905  | 0.05555555556 |  | 3.294117647  | #DIV/0! |
| ZCCHC7   | 0.09523809524 | 0.09523809524 | 0.05555555556 |  | 1.473684211  | #DIV/0! |
| ZCCHC8   | 0.04761904762 | 0.04761904762 | 0.1111111111  |  | 0.325        | #DIV/0! |
| ZCCHC9   | 0.04761904762 | 0.04761904762 | 0             |  | inf          | #DIV/0! |
| ZCRB1    | 0.04761904762 | 0.04761904762 | 0.1111111111  |  | 0.325        | #DIV/0! |
| ZCWPW    | 0.04761904762 | 0.04761904762 | 0.05555555556 |  | 0.7          | #DIV/0! |
| ZCWPW    | 0.04761904762 | 0.04761904762 | 0             |  | inf          | #DIV/0! |
| ZDBF2    | 0             | 0             | 0.05555555556 |  | 0            | #DIV/0! |
| ZDHHC1   | 0.1428571429  | 0.1428571429  | 0.05555555556 |  | 2.333333333  | #DIV/0! |
| ZDHHC1   | 0             | 0             | 0.05555555556 |  | 0            | #DIV/0! |
| ZDHHC1   | 0             | 0             | 0.05555555556 |  | 0            | #DIV/0! |
| ZDHHC1   | 0.09523809524 | 0.09523809524 | 0.05555555556 |  | 1.473684211  | #DIV/0! |
| ZDHHC1   | 0.1428571429  | 0.1428571429  | 0             |  | inf          | #DIV/0! |
| ZDHHC1   | 0.04761904762 | 0.04761904762 | 0.1111111111  |  | 0.325        | #DIV/0! |
| ZDHHC1   | 0.04761904762 | 0.04761904762 | 0.1111111111  |  | 0.325        | #DIV/0! |
| ZDHHC1   | 0.1428571429  | 0.1428571429  | 0.05555555556 |  | 2.333333333  | #DIV/0! |
| ZDHHC2   | 0.09523809524 | 0.09523809524 | 0.1111111111  |  | 0.6842105263 | #DIV/0! |
| ZDHHC2   | 0.1428571429  | 0.1428571429  | 0.05555555556 |  | 2.333333333  | #DIV/0! |
| ZDHHC2   | 0.09523809524 | 0.09523809524 | 0.05555555556 |  | 1.473684211  | #DIV/0! |
| ZDHHC4   | 0.04761904762 | 0.04761904762 | 0.1666666667  |  | 0.2          | #DIV/0! |
| ZDHHC6   | 0.1428571429  | 0.1428571429  | 0.05555555556 |  | 2.333333333  | #DIV/0! |
| ZDHHC7   | 0.04761904762 | 0.04761904762 | 0             |  | inf          | #DIV/0! |
| ZDHHC8   | 0.04761904762 | 0.04761904762 | 0.05555555556 |  | 0.7          | #DIV/0! |
| ZDHHC8I  | 0             | 0             | 0.05555555556 |  | 0            | #DIV/0! |
| ZEB1     | 0.09523809524 | 0.09523809524 | 0.2222222222  |  | 0.2894736842 | #DIV/0! |
| ZEB1-AS  | 0.09523809524 | 0.09523809524 | 0.2222222222  |  | 0.2894736842 | #DIV/0! |
| ZEB2     | 0             | 0             | 0.05555555556 |  | 0            | #DIV/0! |
| ZEB2-AS  | 0             | 0             | 0.05555555556 |  | 0            | #DIV/0! |
| ZER1     | 0.09523809524 | 0.09523809524 | 0.05555555556 |  | 1.473684211  | #DIV/0! |
| ZFAND1   | 0.1428571429  | 0.1428571429  | 0.1111111111  |  | 1.083333333  | #DIV/0! |
| ZFAND2   | 0.04761904762 | 0.04761904762 | 0.1666666667  |  | 0.2          | #DIV/0! |
| ZFAND3   | 0.04761904762 | 0.04761904762 | 0.05555555556 |  | 0.7          | #DIV/0! |

|         |               |               |               |  |              |         |
|---------|---------------|---------------|---------------|--|--------------|---------|
| ZFAND4  | 0.1428571429  | 0.1428571429  | 0.05555555556 |  | 2.333333333  | #DIV/0! |
| ZFAND5  | 0             | 0             | 0.05555555556 |  | 0            | #DIV/0! |
| ZFAND6  | 0.04761904762 | 0.04761904762 | 0.05555555556 |  | 0.7          | #DIV/0! |
| ZFAS1   | 0.09523809524 | 0.09523809524 | 0.16666666667 |  | 0.4210526316 | #DIV/0! |
| ZFAT    | 0.04761904762 | 0.04761904762 | 0.2222222222  |  | 0.1375       | #DIV/0! |
| FAT-AS  | 0.04761904762 | 0.04761904762 | 0.2222222222  |  | 0.1375       | #DIV/0! |
| ZFC3H1  | 0.04761904762 | 0.04761904762 | 0.1111111111  |  | 0.325        | #DIV/0! |
| ZFHX2   | 0             | 0             | 0.05555555556 |  | 0            | #DIV/0! |
| ZFHX3   | 0.04761904762 | 0.04761904762 | 0             |  | inf          | #DIV/0! |
| ZFHX4   | 0.1904761905  | 0.1904761905  | 0.1111111111  |  | 1.529411765  | #DIV/0! |
| FHX4-AS | 0.1904761905  | 0.1904761905  | 0.1111111111  |  | 1.529411765  | #DIV/0! |
| ZFP1    | 0.04761904762 | 0.04761904762 | 0             |  | inf          | #DIV/0! |
| ZFP14   | 0.04761904762 | 0.04761904762 | 0.05555555556 |  | 0.7          | #DIV/0! |
| ZFP2    | 0.09523809524 | 0.09523809524 | 0.05555555556 |  | 1.473684211  | #DIV/0! |
| ZFP28   | 0.1428571429  | 0.1428571429  | 0.05555555556 |  | 2.333333333  | #DIV/0! |
| ZFP3    | 0             | 0             | 0.1111111111  |  | 0            | #DIV/0! |
| ZFP30   | 0.04761904762 | 0.04761904762 | 0.05555555556 |  | 0.7          | #DIV/0! |
| ZFP36   | 0.04761904762 | 0.04761904762 | 0.05555555556 |  | 0.7          | #DIV/0! |
| ZFP36L1 | 0             | 0             | 0.1111111111  |  | 0            | #DIV/0! |
| ZFP36L2 | 0             | 0             | 0.05555555556 |  | 0            | #DIV/0! |
| ZFP37   | 0.04761904762 | 0.04761904762 | 0.05555555556 |  | 0.7          | #DIV/0! |
| ZFP42   | 0             | 0             | 0.05555555556 |  | 0            | #DIV/0! |
| ZFP62   | 0.09523809524 | 0.09523809524 | 0.05555555556 |  | 1.473684211  | #DIV/0! |
| ZFP64   | 0.09523809524 | 0.09523809524 | 0.1111111111  |  | 0.6842105263 | #DIV/0! |
| ZFP69   | 0.04761904762 | 0.04761904762 | 0.05555555556 |  | 0.7          | #DIV/0! |
| ZFP69B  | 0.04761904762 | 0.04761904762 | 0.05555555556 |  | 0.7          | #DIV/0! |
| ZFP82   | 0.04761904762 | 0.04761904762 | 0.05555555556 |  | 0.7          | #DIV/0! |
| ZFP90   | 0.1428571429  | 0.1428571429  | 0.05555555556 |  | 2.333333333  | #DIV/0! |
| ZFPM1   | 0.1428571429  | 0.1428571429  | 0             |  | inf          | #DIV/0! |
| ZFPM2   | 0.1904761905  | 0.1904761905  | 0.1111111111  |  | 1.529411765  | #DIV/0! |
| FPM2-AS | 0.1904761905  | 0.1904761905  | 0.1111111111  |  | 1.529411765  | #DIV/0! |
| ZFR     | 0.04761904762 | 0.04761904762 | 0.05555555556 |  | 0.7          | #DIV/0! |
| ZFR2    | 0.09523809524 | 0.09523809524 | 0.05555555556 |  | 1.473684211  | #DIV/0! |
| ZFYVE1  | 0.09523809524 | 0.09523809524 | 0             |  | inf          | #DIV/0! |
| ZFYVE10 | 0.04761904762 | 0.04761904762 | 0             |  | inf          | #DIV/0! |
| ZFYVE2  | 0.1428571429  | 0.1428571429  | 0             |  | inf          | #DIV/0! |
| ZFYVE20 | 0.04761904762 | 0.04761904762 | 0             |  | inf          | #DIV/0! |
| ZFYVE9  | 0.04761904762 | 0.04761904762 | 0.05555555556 |  | 0.7          | #DIV/0! |
| ZG16    | 0.04761904762 | 0.04761904762 | 0             |  | inf          | #DIV/0! |
| ZG16B   | 0.04761904762 | 0.04761904762 | 0.1111111111  |  | 0.325        | #DIV/0! |
| ZGPAT   | 0.1428571429  | 0.1428571429  | 0.2222222222  |  | 0.4583333333 | #DIV/0! |
| ZGRF1   | 0             | 0             | 0.05555555556 |  | 0            | #DIV/0! |
| ZHX1    | 0.1428571429  | 0.1428571429  | 0.1111111111  |  | 1.083333333  | #DIV/0! |
| X1-C8or | 0.1428571429  | 0.1428571429  | 0.1111111111  |  | 1.083333333  | #DIV/0! |
| ZHX2    | 0.1428571429  | 0.1428571429  | 0.1111111111  |  | 1.083333333  | #DIV/0! |
| ZHX3    | 0.1428571429  | 0.1428571429  | 0.16666666667 |  | 0.6666666667 | #DIV/0! |
| ZIC1    | 0.1428571429  | 0.1428571429  | 0.1111111111  |  | 1.083333333  | #DIV/0! |
| ZIC4    | 0.1428571429  | 0.1428571429  | 0.1111111111  |  | 1.083333333  | #DIV/0! |
| ZIK1    | 0.1428571429  | 0.1428571429  | 0.05555555556 |  | 2.333333333  | #DIV/0! |
| ZIM2    | 0.1428571429  | 0.1428571429  | 0.05555555556 |  | 2.333333333  | #DIV/0! |
| IM2-AS  | 0.1428571429  | 0.1428571429  | 0.05555555556 |  | 2.333333333  | #DIV/0! |

|         |               |               |               |  |              |         |
|---------|---------------|---------------|---------------|--|--------------|---------|
| ZIM3    | 0.1428571429  | 0.1428571429  | 0.05555555556 |  | 2.333333333  | #DIV/0! |
| KSCAN0  | 0.04761904762 | 0.04761904762 | 0.05555555556 |  | 0.7          | #DIV/0! |
| KSCAN0  | 0.04761904762 | 0.04761904762 | 0             |  | inf          | #DIV/0! |
| KSCAN0  | 0.04761904762 | 0.04761904762 | 0.05555555556 |  | 0.7          | #DIV/0! |
| ZMAT2   | 0.04761904762 | 0.04761904762 | 0             |  | inf          | #DIV/0! |
| ZMAT3   | 0.1904761905  | 0.1904761905  | 0.05555555556 |  | 3.294117647  | #DIV/0! |
| ZMAT4   | 0.09523809524 | 0.09523809524 | 0.1111111111  |  | 0.6842105263 | #DIV/0! |
| ZMAT5   | 0.04761904762 | 0.04761904762 | 0.1111111111  |  | 0.325        | #DIV/0! |
| ZMIZ1   | 0.1428571429  | 0.1428571429  | 0.05555555556 |  | 2.333333333  | #DIV/0! |
| MIZ1-AS | 0.1428571429  | 0.1428571429  | 0.05555555556 |  | 2.333333333  | #DIV/0! |
| ZMIZ2   | 0.04761904762 | 0.04761904762 | 0.2222222222  |  | 0.1375       | #DIV/0! |
| MPSTE2  | 0.04761904762 | 0.04761904762 | 0.05555555556 |  | 0.7          | #DIV/0! |
| ZMYM1   | 0.04761904762 | 0.04761904762 | 0.05555555556 |  | 0.7          | #DIV/0! |
| ZMYM2   | 0.04761904762 | 0.04761904762 | 0             |  | inf          | #DIV/0! |
| ZMYM4   | 0.04761904762 | 0.04761904762 | 0.05555555556 |  | 0.7          | #DIV/0! |
| IYM4-A  | 0.04761904762 | 0.04761904762 | 0.05555555556 |  | 0.7          | #DIV/0! |
| ZMYM5   | 0.04761904762 | 0.04761904762 | 0             |  | inf          | #DIV/0! |
| ZMYM6   | 0.04761904762 | 0.04761904762 | 0.05555555556 |  | 0.7          | #DIV/0! |
| MYND1   | 0.09523809524 | 0.09523809524 | 0             |  | inf          | #DIV/0! |
| MYND1   | 0.04761904762 | 0.04761904762 | 0.1111111111  |  | 0.325        | #DIV/0! |
| MYND1   | 0.04761904762 | 0.04761904762 | 0.05555555556 |  | 0.7          | #DIV/0! |
| MYND1   | 0             | 0             | 0.1111111111  |  | 0            | #DIV/0! |
| MYND1   | 0.09523809524 | 0.09523809524 | 0             |  | inf          | #DIV/0! |
| ZMYND1  | 0.1428571429  | 0.1428571429  | 0.1666666667  |  | 0.6666666667 | #DIV/0! |
| ZNF10   | 0.09523809524 | 0.09523809524 | 0.05555555556 |  | 1.473684211  | #DIV/0! |
| ZNF100  | 0.09523809524 | 0.09523809524 | 0             |  | inf          | #DIV/0! |
| ZNF101  | 0.1428571429  | 0.1428571429  | 0.1111111111  |  | 1.083333333  | #DIV/0! |
| ZNF107  | 0.04761904762 | 0.04761904762 | 0.05555555556 |  | 0.7          | #DIV/0! |
| ZNF112  | 0.09523809524 | 0.09523809524 | 0.05555555556 |  | 1.473684211  | #DIV/0! |
| ZNF114  | 0.09523809524 | 0.09523809524 | 0.1111111111  |  | 0.6842105263 | #DIV/0! |
| ZNF117  | 0.04761904762 | 0.04761904762 | 0.1111111111  |  | 0.325        | #DIV/0! |
| ZNF12   | 0.04761904762 | 0.04761904762 | 0.1666666667  |  | 0.2          | #DIV/0! |
| ZNF121  | 0.1428571429  | 0.1428571429  | 0.1111111111  |  | 1.083333333  | #DIV/0! |
| ZNF124  | 0.1428571429  | 0.1428571429  | 0             |  | inf          | #DIV/0! |
| ZNF131  | 0.04761904762 | 0.04761904762 | 0.05555555556 |  | 0.7          | #DIV/0! |
| ZNF132  | 0.1428571429  | 0.1428571429  | 0.05555555556 |  | 2.333333333  | #DIV/0! |
| ZNF133  | 0.1904761905  | 0.1904761905  | 0.05555555556 |  | 3.294117647  | #DIV/0! |
| ZNF134  | 0.1428571429  | 0.1428571429  | 0.05555555556 |  | 2.333333333  | #DIV/0! |
| ZNF135  | 0.1428571429  | 0.1428571429  | 0.05555555556 |  | 2.333333333  | #DIV/0! |
| ZNF136  | 0.1428571429  | 0.1428571429  | 0.1111111111  |  | 1.083333333  | #DIV/0! |
| ZNF137  | 0.09523809524 | 0.09523809524 | 0.05555555556 |  | 1.473684211  | #DIV/0! |
| ZNF138  | 0.04761904762 | 0.04761904762 | 0.05555555556 |  | 0.7          | #DIV/0! |
| ZNF14   | 0.1428571429  | 0.1428571429  | 0.1111111111  |  | 1.083333333  | #DIV/0! |
| ZNF140  | 0.09523809524 | 0.09523809524 | 0.05555555556 |  | 1.473684211  | #DIV/0! |
| ZNF141  | 0.04761904762 | 0.04761904762 | 0             |  | inf          | #DIV/0! |
| ZNF142  | 0             | 0             | 0.05555555556 |  | 0            | #DIV/0! |
| ZNF143  | 0.04761904762 | 0.04761904762 | 0.05555555556 |  | 0.7          | #DIV/0! |
| ZNF146  | 0.04761904762 | 0.04761904762 | 0.05555555556 |  | 0.7          | #DIV/0! |
| ZNF148  | 0.04761904762 | 0.04761904762 | 0.05555555556 |  | 0.7          | #DIV/0! |
| ZNF154  | 0.1428571429  | 0.1428571429  | 0.05555555556 |  | 2.333333333  | #DIV/0! |
| ZNF155  | 0.09523809524 | 0.09523809524 | 0.05555555556 |  | 1.473684211  | #DIV/0! |

|           |               |               |               |  |              |         |
|-----------|---------------|---------------|---------------|--|--------------|---------|
| ZNF16     | 0.09523809524 | 0.09523809524 | 0.222222222   |  | 0.2894736842 | #DIV/0! |
| ZNF160    | 0.09523809524 | 0.09523809524 | 0.05555555556 |  | 1.473684211  | #DIV/0! |
| ZNF169    | 0.04761904762 | 0.04761904762 | 0.05555555556 |  | 0.7          | #DIV/0! |
| ZNF17     | 0.1428571429  | 0.1428571429  | 0.05555555556 |  | 2.333333333  | #DIV/0! |
| ZNF174    | 0.04761904762 | 0.04761904762 | 0.1111111111  |  | 0.325        | #DIV/0! |
| ZNF177    | 0.1428571429  | 0.1428571429  | 0.05555555556 |  | 2.333333333  | #DIV/0! |
| ZNF18     | 0.04761904762 | 0.04761904762 | 0.05555555556 |  | 0.7          | #DIV/0! |
| ZNF180    | 0.09523809524 | 0.09523809524 | 0.05555555556 |  | 1.473684211  | #DIV/0! |
| ZNF181    | 0.04761904762 | 0.04761904762 | 0.05555555556 |  | 0.7          | #DIV/0! |
| ZNF189    | 0.04761904762 | 0.04761904762 | 0             |  | inf          | #DIV/0! |
| ZNF19     | 0.04761904762 | 0.04761904762 | 0             |  | inf          | #DIV/0! |
| ZNF195    | 0.04761904762 | 0.04761904762 | 0             |  | inf          | #DIV/0! |
| ZNF2      | 0             | 0             | 0.1111111111  |  | 0            | #DIV/0! |
| ZNF20     | 0.1428571429  | 0.1428571429  | 0.1111111111  |  | 1.083333333  | #DIV/0! |
| ZNF200    | 0.04761904762 | 0.04761904762 | 0.1111111111  |  | 0.325        | #DIV/0! |
| ZNF205    | 0.04761904762 | 0.04761904762 | 0.1111111111  |  | 0.325        | #DIV/0! |
| ZNF205-A  | 0.04761904762 | 0.04761904762 | 0.1111111111  |  | 0.325        | #DIV/0! |
| ZNF207    | 0             | 0             | 0             |  |              | #DIV/0! |
| ZNF208    | 0.09523809524 | 0.09523809524 | 0             |  | inf          | #DIV/0! |
| ZNF211    | 0.1428571429  | 0.1428571429  | 0.05555555556 |  | 2.333333333  | #DIV/0! |
| ZNF212    | 0.09523809524 | 0.09523809524 | 0.05555555556 |  | 1.473684211  | #DIV/0! |
| ZNF213    | 0.04761904762 | 0.04761904762 | 0.1111111111  |  | 0.325        | #DIV/0! |
| ZNF213-A  | 0.04761904762 | 0.04761904762 | 0.1111111111  |  | 0.325        | #DIV/0! |
| ZNF214    | 0.04761904762 | 0.04761904762 | 0             |  | inf          | #DIV/0! |
| ZNF215    | 0.04761904762 | 0.04761904762 | 0             |  | inf          | #DIV/0! |
| ZNF217    | 0.09523809524 | 0.09523809524 | 0.1111111111  |  | 0.6842105263 | #DIV/0! |
| ZNF22     | 0.1428571429  | 0.1428571429  | 0.05555555556 |  | 2.333333333  | #DIV/0! |
| ZNF221    | 0.09523809524 | 0.09523809524 | 0.05555555556 |  | 1.473684211  | #DIV/0! |
| ZNF222    | 0.09523809524 | 0.09523809524 | 0.05555555556 |  | 1.473684211  | #DIV/0! |
| ZNF223    | 0.09523809524 | 0.09523809524 | 0.05555555556 |  | 1.473684211  | #DIV/0! |
| ZNF224    | 0.09523809524 | 0.09523809524 | 0.05555555556 |  | 1.473684211  | #DIV/0! |
| ZNF225    | 0.09523809524 | 0.09523809524 | 0.05555555556 |  | 1.473684211  | #DIV/0! |
| ZNF226    | 0.09523809524 | 0.09523809524 | 0.05555555556 |  | 1.473684211  | #DIV/0! |
| ZNF227    | 0.09523809524 | 0.09523809524 | 0.05555555556 |  | 1.473684211  | #DIV/0! |
| ZNF229    | 0.09523809524 | 0.09523809524 | 0.05555555556 |  | 1.473684211  | #DIV/0! |
| ZNF23     | 0.04761904762 | 0.04761904762 | 0             |  | inf          | #DIV/0! |
| ZNF230    | 0.09523809524 | 0.09523809524 | 0.05555555556 |  | 1.473684211  | #DIV/0! |
| ZNF232    | 0             | 0             | 0.1111111111  |  | 0            | #DIV/0! |
| ZNF233    | 0.09523809524 | 0.09523809524 | 0.05555555556 |  | 1.473684211  | #DIV/0! |
| ZNF234    | 0.09523809524 | 0.09523809524 | 0.05555555556 |  | 1.473684211  | #DIV/0! |
| ZNF235    | 0.09523809524 | 0.09523809524 | 0.05555555556 |  | 1.473684211  | #DIV/0! |
| ZNF236    | 0.09523809524 | 0.09523809524 | 0.05555555556 |  | 1.473684211  | #DIV/0! |
| ZNF236-D  | 0.09523809524 | 0.09523809524 | 0.05555555556 |  | 1.473684211  | #DIV/0! |
| ZNF239    | 0.1428571429  | 0.1428571429  | 0.05555555556 |  | 2.333333333  | #DIV/0! |
| ZNF24     | 0.09523809524 | 0.09523809524 | 0             |  | inf          | #DIV/0! |
| ZNF248    | 0.09523809524 | 0.09523809524 | 0.1111111111  |  | 0.6842105263 | #DIV/0! |
| ZNF25     | 0.09523809524 | 0.09523809524 | 0.1111111111  |  | 0.6842105263 | #DIV/0! |
| ZNF250    | 0.09523809524 | 0.09523809524 | 0.222222222   |  | 0.2894736842 | #DIV/0! |
| ZNF251    | 0.09523809524 | 0.09523809524 | 0.222222222   |  | 0.2894736842 | #DIV/0! |
| ZNF251P   | 0.09523809524 | 0.09523809524 | 0.222222222   |  | 0.2894736842 | #DIV/0! |
| ZNF252P-A | 0.09523809524 | 0.09523809524 | 0.222222222   |  | 0.2894736842 | #DIV/0! |

|          |               |               |               |  |              |         |
|----------|---------------|---------------|---------------|--|--------------|---------|
| ZNF253   | 0.1428571429  | 0.1428571429  | 0.05555555556 |  | 2.333333333  | #DIV/0! |
| ZNF254   | 0.09523809524 | 0.09523809524 | 0             |  | inf          | #DIV/0! |
| ZNF256   | 0.1428571429  | 0.1428571429  | 0.05555555556 |  | 2.333333333  | #DIV/0! |
| ZNF257   | 0.09523809524 | 0.09523809524 | 0             |  | inf          | #DIV/0! |
| ZNF26    | 0.09523809524 | 0.09523809524 | 0.05555555556 |  | 1.473684211  | #DIV/0! |
| ZNF260   | 0.04761904762 | 0.04761904762 | 0.05555555556 |  | 0.7          | #DIV/0! |
| ZNF263   | 0.04761904762 | 0.04761904762 | 0.1111111111  |  | 0.325        | #DIV/0! |
| ZNF264   | 0.1428571429  | 0.1428571429  | 0.05555555556 |  | 2.333333333  | #DIV/0! |
| ZNF266   | 0.1428571429  | 0.1428571429  | 0.05555555556 |  | 2.333333333  | #DIV/0! |
| ZNF267   | 0.04761904762 | 0.04761904762 | 0             |  | inf          | #DIV/0! |
| ZNF268   | 0.09523809524 | 0.09523809524 | 0.05555555556 |  | 1.473684211  | #DIV/0! |
| ZNF271   | 0.09523809524 | 0.09523809524 | 0             |  | inf          | #DIV/0! |
| ZNF273   | 0.04761904762 | 0.04761904762 | 0.1111111111  |  | 0.325        | #DIV/0! |
| ZNF274   | 0.1428571429  | 0.1428571429  | 0.05555555556 |  | 2.333333333  | #DIV/0! |
| ZNF276   | 0.09523809524 | 0.09523809524 | 0             |  | inf          | #DIV/0! |
| ZNF277   | 0.04761904762 | 0.04761904762 | 0.05555555556 |  | 0.7          | #DIV/0! |
| ZNF28    | 0.09523809524 | 0.09523809524 | 0.05555555556 |  | 1.473684211  | #DIV/0! |
| ZNF280   | 0.04761904762 | 0.04761904762 | 0.05555555556 |  | 0.7          | #DIV/0! |
| ZNF280B  | 0.04761904762 | 0.04761904762 | 0.05555555556 |  | 0.7          | #DIV/0! |
| ZNF280I  | 0.04761904762 | 0.04761904762 | 0.05555555556 |  | 0.7          | #DIV/0! |
| ZNF281   | 0.1428571429  | 0.1428571429  | 0             |  | inf          | #DIV/0! |
| ZNF282   | 0.09523809524 | 0.09523809524 | 0.05555555556 |  | 1.473684211  | #DIV/0! |
| ZNF283   | 0.09523809524 | 0.09523809524 | 0.05555555556 |  | 1.473684211  | #DIV/0! |
| ZNF284   | 0.09523809524 | 0.09523809524 | 0.05555555556 |  | 1.473684211  | #DIV/0! |
| ZNF285   | 0.09523809524 | 0.09523809524 | 0.05555555556 |  | 1.473684211  | #DIV/0! |
| ZNF286   | 0.04761904762 | 0.04761904762 | 0.05555555556 |  | 0.7          | #DIV/0! |
| ZNF286B  | 0.04761904762 | 0.04761904762 | 0.1111111111  |  | 0.325        | #DIV/0! |
| ZNF287   | 0.04761904762 | 0.04761904762 | 0.05555555556 |  | 0.7          | #DIV/0! |
| ZNF295-A | 0.04761904762 | 0.04761904762 | 0.1111111111  |  | 0.325        | #DIV/0! |
| ZNF296   | 0.09523809524 | 0.09523809524 | 0.1111111111  |  | 0.6842105263 | #DIV/0! |
| ZNF3     | 0.04761904762 | 0.04761904762 | 0.05555555556 |  | 0.7          | #DIV/0! |
| ZNF30    | 0.04761904762 | 0.04761904762 | 0.05555555556 |  | 0.7          | #DIV/0! |
| ZNF30-AS | 0.04761904762 | 0.04761904762 | 0.05555555556 |  | 0.7          | #DIV/0! |
| ZNF302   | 0.04761904762 | 0.04761904762 | 0.05555555556 |  | 0.7          | #DIV/0! |
| ZNF304   | 0.1428571429  | 0.1428571429  | 0.05555555556 |  | 2.333333333  | #DIV/0! |
| ZNF316   | 0.04761904762 | 0.04761904762 | 0.1666666667  |  | 0.2          | #DIV/0! |
| ZNF317   | 0.1428571429  | 0.1428571429  | 0.05555555556 |  | 2.333333333  | #DIV/0! |
| ZNF318   | 0.04761904762 | 0.04761904762 | 0.05555555556 |  | 0.7          | #DIV/0! |
| ZNF319   | 0.04761904762 | 0.04761904762 | 0             |  | inf          | #DIV/0! |
| ZNF32    | 0.1428571429  | 0.1428571429  | 0.05555555556 |  | 2.333333333  | #DIV/0! |
| ZNF32-AS | 0.1428571429  | 0.1428571429  | 0.05555555556 |  | 2.333333333  | #DIV/0! |
| ZNF32-AS | 0.1428571429  | 0.1428571429  | 0.05555555556 |  | 2.333333333  | #DIV/0! |
| ZNF32-AS | 0.1428571429  | 0.1428571429  | 0.05555555556 |  | 2.333333333  | #DIV/0! |
| ZNF320   | 0.09523809524 | 0.09523809524 | 0.05555555556 |  | 1.473684211  | #DIV/0! |
| ZNF321   | 0.09523809524 | 0.09523809524 | 0.05555555556 |  | 1.473684211  | #DIV/0! |
| ZNF324   | 0.1428571429  | 0.1428571429  | 0.05555555556 |  | 2.333333333  | #DIV/0! |
| ZNF324B  | 0.1428571429  | 0.1428571429  | 0.05555555556 |  | 2.333333333  | #DIV/0! |
| ZNF326   | 0.04761904762 | 0.04761904762 | 0.05555555556 |  | 0.7          | #DIV/0! |
| ZNF329   | 0.1428571429  | 0.1428571429  | 0.05555555556 |  | 2.333333333  | #DIV/0! |
| ZNF330   | 0             | 0             | 0.05555555556 |  | 0            | #DIV/0! |
| ZNF331   | 0.09523809524 | 0.09523809524 | 0.05555555556 |  | 1.473684211  | #DIV/0! |

|           |               |               |              |  |              |         |
|-----------|---------------|---------------|--------------|--|--------------|---------|
| ZNF333    | 0.1428571429  | 0.1428571429  | 0.1111111111 |  | 1.083333333  | #DIV/0! |
| ZNF334    | 0.1428571429  | 0.1428571429  | 0.1666666667 |  | 0.6666666667 | #DIV/0! |
| ZNF335    | 0.1428571429  | 0.1428571429  | 0.1666666667 |  | 0.6666666667 | #DIV/0! |
| ZNF337    | 0.1904761905  | 0.1904761905  | 0.0555555556 |  | 3.294117647  | #DIV/0! |
| ZNF337-A  | 0.1904761905  | 0.1904761905  | 0.0555555556 |  | 3.294117647  | #DIV/0! |
| ZNF33A    | 0.09523809524 | 0.09523809524 | 0.1111111111 |  | 0.6842105263 | #DIV/0! |
| ZNF33B    | 0.1428571429  | 0.1428571429  | 0.0555555556 |  | 2.333333333  | #DIV/0! |
| ZNF33B    | 0.09523809524 | 0.09523809524 | 0.1111111111 |  | 0.6842105263 | #DIV/0! |
| ZNF34     | 0.09523809524 | 0.09523809524 | 0.2222222222 |  | 0.2894736842 | #DIV/0! |
| ZNF341    | 0.09523809524 | 0.09523809524 | 0.1111111111 |  | 0.6842105263 | #DIV/0! |
| ZNF341-A  | 0.09523809524 | 0.09523809524 | 0.1111111111 |  | 0.6842105263 | #DIV/0! |
| ZNF343    | 0.1904761905  | 0.1904761905  | 0.0555555556 |  | 3.294117647  | #DIV/0! |
| ZNF345    | 0.04761904762 | 0.04761904762 | 0.0555555556 |  | 0.7          | #DIV/0! |
| ZNF346    | 0.09523809524 | 0.09523809524 | 0.0555555556 |  | 1.473684211  | #DIV/0! |
| ZNF347    | 0.09523809524 | 0.09523809524 | 0.0555555556 |  | 1.473684211  | #DIV/0! |
| ZNF350    | 0.09523809524 | 0.09523809524 | 0.0555555556 |  | 1.473684211  | #DIV/0! |
| ZNF350-A  | 0.09523809524 | 0.09523809524 | 0.0555555556 |  | 1.473684211  | #DIV/0! |
| ZNF354A   | 0.09523809524 | 0.09523809524 | 0.0555555556 |  | 1.473684211  | #DIV/0! |
| ZNF354B   | 0.09523809524 | 0.09523809524 | 0.0555555556 |  | 1.473684211  | #DIV/0! |
| ZNF354C   | 0.09523809524 | 0.09523809524 | 0.0555555556 |  | 1.473684211  | #DIV/0! |
| ZNF358    | 0.1428571429  | 0.1428571429  | 0.0555555556 |  | 2.333333333  | #DIV/0! |
| ZNF362    | 0.04761904762 | 0.04761904762 | 0.0555555556 |  | 0.7          | #DIV/0! |
| ZNF365    | 0.04761904762 | 0.04761904762 | 0.1666666667 |  | 0.2          | #DIV/0! |
| ZNF366    | 0             | 0             | 0.0555555556 |  | 0            | #DIV/0! |
| ZNF367    | 0.04761904762 | 0.04761904762 | 0.0555555556 |  | 0.7          | #DIV/0! |
| ZNF37A    | 0.09523809524 | 0.09523809524 | 0.1111111111 |  | 0.6842105263 | #DIV/0! |
| ZNF37B    | 0.1428571429  | 0.1428571429  | 0.0555555556 |  | 2.333333333  | #DIV/0! |
| ZNF382    | 0.04761904762 | 0.04761904762 | 0.0555555556 |  | 0.7          | #DIV/0! |
| ZNF383    | 0.04761904762 | 0.04761904762 | 0.0555555556 |  | 0.7          | #DIV/0! |
| ZNF384    | 0.04761904762 | 0.04761904762 | 0.1111111111 |  | 0.325        | #DIV/0! |
| ZNF385A   | 0.04761904762 | 0.04761904762 | 0.0555555556 |  | 0.7          | #DIV/0! |
| ZNF385B   | 0             | 0             | 0.0555555556 |  | 0            | #DIV/0! |
| ZNF385C   | 0.09523809524 | 0.09523809524 | 0            |  | inf          | #DIV/0! |
| ZNF385D   | 0.04761904762 | 0.04761904762 | 0            |  | inf          | #DIV/0! |
| ZNF385D-A | 0.04761904762 | 0.04761904762 | 0            |  | inf          | #DIV/0! |
| ZNF385D-B | 0.04761904762 | 0.04761904762 | 0            |  | inf          | #DIV/0! |
| ZNF394    | 0.04761904762 | 0.04761904762 | 0.0555555556 |  | 0.7          | #DIV/0! |
| ZNF395    | 0.04761904762 | 0.04761904762 | 0.1111111111 |  | 0.325        | #DIV/0! |
| ZNF396    | 0.09523809524 | 0.09523809524 | 0            |  | inf          | #DIV/0! |
| ZNF397    | 0.09523809524 | 0.09523809524 | 0            |  | inf          | #DIV/0! |
| ZNF398    | 0.09523809524 | 0.09523809524 | 0.0555555556 |  | 1.473684211  | #DIV/0! |
| ZNF404    | 0.09523809524 | 0.09523809524 | 0.0555555556 |  | 1.473684211  | #DIV/0! |
| ZNF407    | 0.09523809524 | 0.09523809524 | 0            |  | inf          | #DIV/0! |
| ZNF408    | 0             | 0             | 0.0555555556 |  | 0            | #DIV/0! |
| ZNF410    | 0.09523809524 | 0.09523809524 | 0            |  | inf          | #DIV/0! |
| ZNF414    | 0.1428571429  | 0.1428571429  | 0.0555555556 |  | 2.333333333  | #DIV/0! |
| ZNF415    | 0.09523809524 | 0.09523809524 | 0.0555555556 |  | 1.473684211  | #DIV/0! |
| ZNF416    | 0.1428571429  | 0.1428571429  | 0.0555555556 |  | 2.333333333  | #DIV/0! |
| ZNF417    | 0.1428571429  | 0.1428571429  | 0.0555555556 |  | 2.333333333  | #DIV/0! |
| ZNF418    | 0.1428571429  | 0.1428571429  | 0.0555555556 |  | 2.333333333  | #DIV/0! |
| ZNF419    | 0.1428571429  | 0.1428571429  | 0.0555555556 |  | 2.333333333  | #DIV/0! |

|         |               |               |               |  |              |         |
|---------|---------------|---------------|---------------|--|--------------|---------|
| ZNF420  | 0.04761904762 | 0.04761904762 | 0.05555555556 |  | 0.7          | #DIV/0! |
| ZNF423  | 0.04761904762 | 0.04761904762 | 0             |  | inf          | #DIV/0! |
| ZNF425  | 0.09523809524 | 0.09523809524 | 0.05555555556 |  | 1.473684211  | #DIV/0! |
| ZNF426  | 0.1428571429  | 0.1428571429  | 0.1111111111  |  | 1.083333333  | #DIV/0! |
| NF426-D | 0.1428571429  | 0.1428571429  | 0.1111111111  |  | 1.083333333  | #DIV/0! |
| ZNF428  | 0.09523809524 | 0.09523809524 | 0.05555555556 |  | 1.473684211  | #DIV/0! |
| ZNF429  | 0.09523809524 | 0.09523809524 | 0             |  | inf          | #DIV/0! |
| ZNF43   | 0.09523809524 | 0.09523809524 | 0             |  | inf          | #DIV/0! |
| ZNF430  | 0.09523809524 | 0.09523809524 | 0             |  | inf          | #DIV/0! |
| ZNF431  | 0.09523809524 | 0.09523809524 | 0             |  | inf          | #DIV/0! |
| ZNF432  | 0.09523809524 | 0.09523809524 | 0.05555555556 |  | 1.473684211  | #DIV/0! |
| ZNF433  | 0.1428571429  | 0.1428571429  | 0.1111111111  |  | 1.083333333  | #DIV/0! |
| NF433-A | 0.1428571429  | 0.1428571429  | 0.1111111111  |  | 1.083333333  | #DIV/0! |
| ZNF436  | 0.04761904762 | 0.04761904762 | 0.1111111111  |  | 0.325        | #DIV/0! |
| NF436-A | 0.04761904762 | 0.04761904762 | 0.1111111111  |  | 0.325        | #DIV/0! |
| ZNF438  | 0.09523809524 | 0.09523809524 | 0.2222222222  |  | 0.2894736842 | #DIV/0! |
| ZNF439  | 0.1428571429  | 0.1428571429  | 0.1111111111  |  | 1.083333333  | #DIV/0! |
| ZNF44   | 0.1428571429  | 0.1428571429  | 0.1111111111  |  | 1.083333333  | #DIV/0! |
| ZNF440  | 0.1428571429  | 0.1428571429  | 0.1111111111  |  | 1.083333333  | #DIV/0! |
| ZNF441  | 0.1428571429  | 0.1428571429  | 0.1111111111  |  | 1.083333333  | #DIV/0! |
| ZNF442  | 0.1428571429  | 0.1428571429  | 0.1111111111  |  | 1.083333333  | #DIV/0! |
| ZNF443  | 0.1428571429  | 0.1428571429  | 0.1111111111  |  | 1.083333333  | #DIV/0! |
| ZNF444  | 0.1428571429  | 0.1428571429  | 0.05555555556 |  | 2.333333333  | #DIV/0! |
| ZNF446  | 0.1428571429  | 0.1428571429  | 0.05555555556 |  | 2.333333333  | #DIV/0! |
| ZNF45   | 0.09523809524 | 0.09523809524 | 0.05555555556 |  | 1.473684211  | #DIV/0! |
| ZNF451  | 0.04761904762 | 0.04761904762 | 0.05555555556 |  | 0.7          | #DIV/0! |
| NF451-A | 0.04761904762 | 0.04761904762 | 0.05555555556 |  | 0.7          | #DIV/0! |
| ZNF454  | 0.09523809524 | 0.09523809524 | 0.05555555556 |  | 1.473684211  | #DIV/0! |
| ZNF460  | 0.1428571429  | 0.1428571429  | 0.05555555556 |  | 2.333333333  | #DIV/0! |
| NF460-A | 0.1428571429  | 0.1428571429  | 0.05555555556 |  | 2.333333333  | #DIV/0! |
| ZNF461  | 0.04761904762 | 0.04761904762 | 0.05555555556 |  | 0.7          | #DIV/0! |
| ZNF462  | 0.04761904762 | 0.04761904762 | 0.05555555556 |  | 0.7          | #DIV/0! |
| ZNF467  | 0.09523809524 | 0.09523809524 | 0.05555555556 |  | 1.473684211  | #DIV/0! |
| ZNF468  | 0.09523809524 | 0.09523809524 | 0.05555555556 |  | 1.473684211  | #DIV/0! |
| ZNF469  | 0.1428571429  | 0.1428571429  | 0             |  | inf          | #DIV/0! |
| ZNF470  | 0.1428571429  | 0.1428571429  | 0.05555555556 |  | 2.333333333  | #DIV/0! |
| ZNF471  | 0.1428571429  | 0.1428571429  | 0.05555555556 |  | 2.333333333  | #DIV/0! |
| ZNF473  | 0.09523809524 | 0.09523809524 | 0.1111111111  |  | 0.6842105263 | #DIV/0! |
| ZNF474  | 0.04761904762 | 0.04761904762 | 0             |  | inf          | #DIV/0! |
| ZNF479  | 0.1428571429  | 0.1428571429  | 0.1666666667  |  | 0.6666666667 | #DIV/0! |
| ZNF48   | 0.04761904762 | 0.04761904762 | 0             |  | inf          | #DIV/0! |
| ZNF480  | 0.09523809524 | 0.09523809524 | 0.05555555556 |  | 1.473684211  | #DIV/0! |
| ZNF483  | 0.04761904762 | 0.04761904762 | 0.05555555556 |  | 0.7          | #DIV/0! |
| ZNF484  | 0.04761904762 | 0.04761904762 | 0.05555555556 |  | 0.7          | #DIV/0! |
| ZNF485  | 0.1428571429  | 0.1428571429  | 0.05555555556 |  | 2.333333333  | #DIV/0! |
| ZNF486  | 0.1428571429  | 0.1428571429  | 0             |  | inf          | #DIV/0! |
| ZNF487  | 0.1428571429  | 0.1428571429  | 0.05555555556 |  | 2.333333333  | #DIV/0! |
| ZNF488  | 0.1428571429  | 0.1428571429  | 0.05555555556 |  | 2.333333333  | #DIV/0! |
| ZNF490  | 0.1428571429  | 0.1428571429  | 0.1111111111  |  | 1.083333333  | #DIV/0! |
| ZNF491  | 0.1428571429  | 0.1428571429  | 0.1111111111  |  | 1.083333333  | #DIV/0! |
| ZNF492  | 0.09523809524 | 0.09523809524 | 0             |  | inf          | #DIV/0! |

|          |               |               |               |  |              |         |
|----------|---------------|---------------|---------------|--|--------------|---------|
| ZNF493   | 0.09523809524 | 0.09523809524 | 0             |  | inf          | #DIV/0! |
| ZNF496   | 0.1428571429  | 0.1428571429  | 0             |  | inf          | #DIV/0! |
| ZNF497   | 0.1428571429  | 0.1428571429  | 0.05555555556 |  | 2.333333333  | #DIV/0! |
| ZNF500   | 0.04761904762 | 0.04761904762 | 0             |  | inf          | #DIV/0! |
| ZNF503   | 0.1904761905  | 0.1904761905  | 0.05555555556 |  | 3.294117647  | #DIV/0! |
| ZNF503-A | 0.1904761905  | 0.1904761905  | 0.05555555556 |  | 3.294117647  | #DIV/0! |
| ZNF503-A | 0.1428571429  | 0.1428571429  | 0.05555555556 |  | 2.333333333  | #DIV/0! |
| ZNF506   | 0.1428571429  | 0.1428571429  | 0.1111111111  |  | 1.083333333  | #DIV/0! |
| ZNF507   | 0.04761904762 | 0.04761904762 | 0.05555555556 |  | 0.7          | #DIV/0! |
| ZNF510   | 0.04761904762 | 0.04761904762 | 0             |  | inf          | #DIV/0! |
| ZNF511   | 0.1904761905  | 0.1904761905  | 0             |  | inf          | #DIV/0! |
| ZNF512E  | 0.1428571429  | 0.1428571429  | 0.2222222222  |  | 0.4583333333 | #DIV/0! |
| ZNF514   | 0             | 0             | 0.1111111111  |  | 0            | #DIV/0! |
| ZNF516   | 0.09523809524 | 0.09523809524 | 0.05555555556 |  | 1.473684211  | #DIV/0! |
| ZNF517   | 0.09523809524 | 0.09523809524 | 0.2222222222  |  | 0.2894736842 | #DIV/0! |
| ZNF518A  | 0.1428571429  | 0.1428571429  | 0             |  | inf          | #DIV/0! |
| ZNF518E  | 0             | 0             | 0             |  |              | #DIV/0! |
| ZNF519   | 0.09523809524 | 0.09523809524 | 0.05555555556 |  | 1.473684211  | #DIV/0! |
| ZNF521   | 0.09523809524 | 0.09523809524 | 0.1111111111  |  | 0.6842105263 | #DIV/0! |
| ZNF524   | 0.09523809524 | 0.09523809524 | 0.05555555556 |  | 1.473684211  | #DIV/0! |
| ZNF525   | 0.09523809524 | 0.09523809524 | 0.05555555556 |  | 1.473684211  | #DIV/0! |
| ZNF526   | 0.04761904762 | 0.04761904762 | 0.05555555556 |  | 0.7          | #DIV/0! |
| ZNF527   | 0.04761904762 | 0.04761904762 | 0.05555555556 |  | 0.7          | #DIV/0! |
| ZNF528   | 0.09523809524 | 0.09523809524 | 0.05555555556 |  | 1.473684211  | #DIV/0! |
| ZNF528-A | 0.09523809524 | 0.09523809524 | 0.05555555556 |  | 1.473684211  | #DIV/0! |
| ZNF529   | 0.04761904762 | 0.04761904762 | 0.05555555556 |  | 0.7          | #DIV/0! |
| ZNF529-A | 0.04761904762 | 0.04761904762 | 0.05555555556 |  | 0.7          | #DIV/0! |
| ZNF530   | 0.1428571429  | 0.1428571429  | 0.05555555556 |  | 2.333333333  | #DIV/0! |
| ZNF532   | 0.09523809524 | 0.09523809524 | 0             |  | inf          | #DIV/0! |
| ZNF534   | 0.09523809524 | 0.09523809524 | 0.05555555556 |  | 1.473684211  | #DIV/0! |
| ZNF536   | 0.04761904762 | 0.04761904762 | 0.05555555556 |  | 0.7          | #DIV/0! |
| ZNF540   | 0.04761904762 | 0.04761904762 | 0.05555555556 |  | 0.7          | #DIV/0! |
| ZNF541   | 0.09523809524 | 0.09523809524 | 0.1111111111  |  | 0.6842105263 | #DIV/0! |
| ZNF542E  | 0.1428571429  | 0.1428571429  | 0.05555555556 |  | 2.333333333  | #DIV/0! |
| ZNF543   | 0.1428571429  | 0.1428571429  | 0.05555555556 |  | 2.333333333  | #DIV/0! |
| ZNF544   | 0.1428571429  | 0.1428571429  | 0.05555555556 |  | 2.333333333  | #DIV/0! |
| ZNF546   | 0.04761904762 | 0.04761904762 | 0.05555555556 |  | 0.7          | #DIV/0! |
| ZNF547   | 0.1428571429  | 0.1428571429  | 0.05555555556 |  | 2.333333333  | #DIV/0! |
| ZNF548   | 0.1428571429  | 0.1428571429  | 0.05555555556 |  | 2.333333333  | #DIV/0! |
| ZNF549   | 0.1428571429  | 0.1428571429  | 0.05555555556 |  | 2.333333333  | #DIV/0! |
| ZNF550   | 0.1428571429  | 0.1428571429  | 0.05555555556 |  | 2.333333333  | #DIV/0! |
| ZNF551   | 0.1428571429  | 0.1428571429  | 0.05555555556 |  | 2.333333333  | #DIV/0! |
| ZNF552   | 0.1428571429  | 0.1428571429  | 0.05555555556 |  | 2.333333333  | #DIV/0! |
| ZNF554   | 0.09523809524 | 0.09523809524 | 0.05555555556 |  | 1.473684211  | #DIV/0! |
| ZNF555   | 0.09523809524 | 0.09523809524 | 0.05555555556 |  | 1.473684211  | #DIV/0! |
| ZNF556   | 0.09523809524 | 0.09523809524 | 0.05555555556 |  | 1.473684211  | #DIV/0! |
| ZNF557   | 0.1428571429  | 0.1428571429  | 0.05555555556 |  | 2.333333333  | #DIV/0! |
| ZNF558   | 0.1428571429  | 0.1428571429  | 0.05555555556 |  | 2.333333333  | #DIV/0! |
| ZNF559   | 0.1428571429  | 0.1428571429  | 0.05555555556 |  | 2.333333333  | #DIV/0! |
| 559-ZNF  | 0.1428571429  | 0.1428571429  | 0.05555555556 |  | 2.333333333  | #DIV/0! |
| ZNF56    | 0.1428571429  | 0.1428571429  | 0.1111111111  |  | 1.083333333  | #DIV/0! |



|          |               |               |               |  |              |         |
|----------|---------------|---------------|---------------|--|--------------|---------|
| ZNF560   | 0.1428571429  | 0.1428571429  | 0.05555555556 |  | 2.333333333  | #DIV/0! |
| ZNF561   | 0.1428571429  | 0.1428571429  | 0.1111111111  |  | 1.083333333  | #DIV/0! |
| ZNF561-A | 0.1428571429  | 0.1428571429  | 0.1111111111  |  | 1.083333333  | #DIV/0! |
| ZNF562   | 0.1428571429  | 0.1428571429  | 0.1111111111  |  | 1.083333333  | #DIV/0! |
| ZNF563   | 0.1428571429  | 0.1428571429  | 0.1111111111  |  | 1.083333333  | #DIV/0! |
| ZNF564   | 0.1428571429  | 0.1428571429  | 0.1111111111  |  | 1.083333333  | #DIV/0! |
| ZNF565   | 0.04761904762 | 0.04761904762 | 0.05555555556 |  | 0.7          | #DIV/0! |
| ZNF566   | 0.04761904762 | 0.04761904762 | 0.05555555556 |  | 0.7          | #DIV/0! |
| ZNF567   | 0.04761904762 | 0.04761904762 | 0.05555555556 |  | 0.7          | #DIV/0! |
| ZNF568   | 0.04761904762 | 0.04761904762 | 0.05555555556 |  | 0.7          | #DIV/0! |
| ZNF569   | 0.04761904762 | 0.04761904762 | 0.05555555556 |  | 0.7          | #DIV/0! |
| ZNF57    | 0.09523809524 | 0.09523809524 | 0.05555555556 |  | 1.473684211  | #DIV/0! |
| ZNF570   | 0.04761904762 | 0.04761904762 | 0.05555555556 |  | 0.7          | #DIV/0! |
| ZNF571   | 0.04761904762 | 0.04761904762 | 0.05555555556 |  | 0.7          | #DIV/0! |
| ZNF571-A | 0.04761904762 | 0.04761904762 | 0.05555555556 |  | 0.7          | #DIV/0! |
| ZNF572   | 0.1428571429  | 0.1428571429  | 0.1111111111  |  | 1.083333333  | #DIV/0! |
| ZNF573   | 0.04761904762 | 0.04761904762 | 0.05555555556 |  | 0.7          | #DIV/0! |
| ZNF574   | 0.04761904762 | 0.04761904762 | 0.05555555556 |  | 0.7          | #DIV/0! |
| ZNF575   | 0.09523809524 | 0.09523809524 | 0.05555555556 |  | 1.473684211  | #DIV/0! |
| ZNF576   | 0.09523809524 | 0.09523809524 | 0.05555555556 |  | 1.473684211  | #DIV/0! |
| ZNF577   | 0.09523809524 | 0.09523809524 | 0.05555555556 |  | 1.473684211  | #DIV/0! |
| ZNF578   | 0.09523809524 | 0.09523809524 | 0.05555555556 |  | 1.473684211  | #DIV/0! |
| ZNF579   | 0.09523809524 | 0.09523809524 | 0.05555555556 |  | 1.473684211  | #DIV/0! |
| ZNF580   | 0.09523809524 | 0.09523809524 | 0.05555555556 |  | 1.473684211  | #DIV/0! |
| ZNF581   | 0.09523809524 | 0.09523809524 | 0.05555555556 |  | 1.473684211  | #DIV/0! |
| ZNF582   | 0.1428571429  | 0.1428571429  | 0.05555555556 |  | 2.333333333  | #DIV/0! |
| ZNF582-A | 0.1428571429  | 0.1428571429  | 0.05555555556 |  | 2.333333333  | #DIV/0! |
| ZNF583   | 0.1428571429  | 0.1428571429  | 0.05555555556 |  | 2.333333333  | #DIV/0! |
| ZNF584   | 0.1428571429  | 0.1428571429  | 0.05555555556 |  | 2.333333333  | #DIV/0! |
| ZNF585   | 0.04761904762 | 0.04761904762 | 0.05555555556 |  | 0.7          | #DIV/0! |
| ZNF585B  | 0.04761904762 | 0.04761904762 | 0.05555555556 |  | 0.7          | #DIV/0! |
| ZNF586   | 0.1428571429  | 0.1428571429  | 0.05555555556 |  | 2.333333333  | #DIV/0! |
| ZNF587   | 0.1428571429  | 0.1428571429  | 0.05555555556 |  | 2.333333333  | #DIV/0! |
| ZNF587E  | 0.1428571429  | 0.1428571429  | 0.05555555556 |  | 2.333333333  | #DIV/0! |
| ZNF589   | 0.09523809524 | 0.09523809524 | 0             |  | inf          | #DIV/0! |
| ZNF592   | 0.04761904762 | 0.04761904762 | 0.05555555556 |  | 0.7          | #DIV/0! |
| ZNF593   | 0.04761904762 | 0.04761904762 | 0.1111111111  |  | 0.325        | #DIV/0! |
| ZNF594   | 0             | 0             | 0.1111111111  |  | 0            | #DIV/0! |
| ZNF595   | 0.04761904762 | 0.04761904762 | 0             |  | inf          | #DIV/0! |
| ZNF596   | 0.09523809524 | 0.09523809524 | 0.1111111111  |  | 0.6842105263 | #DIV/0! |
| ZNF597   | 0.04761904762 | 0.04761904762 | 0.1111111111  |  | 0.325        | #DIV/0! |
| ZNF598   | 0.09523809524 | 0.09523809524 | 0.2222222222  |  | 0.2894736842 | #DIV/0! |
| ZNF599   | 0.04761904762 | 0.04761904762 | 0.05555555556 |  | 0.7          | #DIV/0! |
| ZNF600   | 0.09523809524 | 0.09523809524 | 0.05555555556 |  | 1.473684211  | #DIV/0! |
| ZNF605   | 0.09523809524 | 0.09523809524 | 0.05555555556 |  | 1.473684211  | #DIV/0! |
| ZNF606   | 0.1428571429  | 0.1428571429  | 0.05555555556 |  | 2.333333333  | #DIV/0! |
| ZNF607   | 0.04761904762 | 0.04761904762 | 0.05555555556 |  | 0.7          | #DIV/0! |
| ZNF608   | 0.04761904762 | 0.04761904762 | 0             |  | inf          | #DIV/0! |
| ZNF609   | 0.04761904762 | 0.04761904762 | 0.05555555556 |  | 0.7          | #DIV/0! |
| ZNF610   | 0.09523809524 | 0.09523809524 | 0.05555555556 |  | 1.473684211  | #DIV/0! |
| ZNF611   | 0.09523809524 | 0.09523809524 | 0.05555555556 |  | 1.473684211  | #DIV/0! |

|           |               |               |               |  |               |         |
|-----------|---------------|---------------|---------------|--|---------------|---------|
| ZNF613    | 0.09523809524 | 0.09523809524 | 0.05555555556 |  | 1.473684211   | #DIV/0! |
| ZNF614    | 0.09523809524 | 0.09523809524 | 0.05555555556 |  | 1.473684211   | #DIV/0! |
| ZNF615    | 0.09523809524 | 0.09523809524 | 0.05555555556 |  | 1.473684211   | #DIV/0! |
| ZNF616    | 0.09523809524 | 0.09523809524 | 0.05555555556 |  | 1.473684211   | #DIV/0! |
| ZNF618    | 0.04761904762 | 0.04761904762 | 0.05555555556 |  | 0.7           | #DIV/0! |
| ZNF619    | 0.04761904762 | 0.04761904762 | 0             |  | inf           | #DIV/0! |
| ZNF620    | 0.04761904762 | 0.04761904762 | 0             |  | inf           | #DIV/0! |
| ZNF621    | 0.04761904762 | 0.04761904762 | 0             |  | inf           | #DIV/0! |
| ZNF622    | 0.04761904762 | 0.04761904762 | 0.05555555556 |  | 0.7           | #DIV/0! |
| ZNF623    | 0.04761904762 | 0.04761904762 | 0.16666666667 |  | 0.2           | #DIV/0! |
| ZNF624    | 0.04761904762 | 0.04761904762 | 0.05555555556 |  | 0.7           | #DIV/0! |
| ZNF625    | 0.1428571429  | 0.1428571429  | 0.11111111111 |  | 1.083333333   | #DIV/0! |
| ZNF625-ZN | 0.1428571429  | 0.1428571429  | 0.11111111111 |  | 1.083333333   | #DIV/0! |
| ZNF626    | 0.09523809524 | 0.09523809524 | 0             |  | inf           | #DIV/0! |
| ZNF627    | 0.1428571429  | 0.1428571429  | 0.11111111111 |  | 1.083333333   | #DIV/0! |
| ZNF628    | 0.09523809524 | 0.09523809524 | 0.05555555556 |  | 1.473684211   | #DIV/0! |
| ZNF629    | 0.04761904762 | 0.04761904762 | 0             |  | inf           | #DIV/0! |
| ZNF638    | 0             | 0             | 0.05555555556 |  | 0             | #DIV/0! |
| ZNF639    | 0.1904761905  | 0.1904761905  | 0.05555555556 |  | 3.294117647   | #DIV/0! |
| ZNF641    | 0.04761904762 | 0.04761904762 | 0.05555555556 |  | 0.7           | #DIV/0! |
| ZNF644    | 0.04761904762 | 0.04761904762 | 0.05555555556 |  | 0.7           | #DIV/0! |
| ZNF646    | 0.04761904762 | 0.04761904762 | 0             |  | inf           | #DIV/0! |
| ZNF648    | 0.1428571429  | 0.1428571429  | 0             |  | inf           | #DIV/0! |
| ZNF649    | 0.09523809524 | 0.09523809524 | 0.05555555556 |  | 1.473684211   | #DIV/0! |
| ZNF649-A  | 0.09523809524 | 0.09523809524 | 0.05555555556 |  | 1.473684211   | #DIV/0! |
| ZNF652    | 0.1428571429  | 0.1428571429  | 0             |  | inf           | #DIV/0! |
| ZNF653    | 0.1428571429  | 0.1428571429  | 0.11111111111 |  | 1.083333333   | #DIV/0! |
| ZNF654    | 0.04761904762 | 0.04761904762 | 0             |  | inf           | #DIV/0! |
| ZNF655    | 0.04761904762 | 0.04761904762 | 0.05555555556 |  | 0.7           | #DIV/0! |
| ZNF658    | 0.04761904762 | 0.04761904762 | 0.11111111111 |  | 0.325         | #DIV/0! |
| ZNF658B   | 0.04761904762 | 0.04761904762 | 0.11111111111 |  | 0.325         | #DIV/0! |
| ZNF66     | 0.09523809524 | 0.09523809524 | 0             |  | inf           | #DIV/0! |
| ZNF662    | 0.04761904762 | 0.04761904762 | 0             |  | inf           | #DIV/0! |
| ZNF663    | 0.1428571429  | 0.1428571429  | 0.16666666667 |  | 0.66666666667 | #DIV/0! |
| ZNF664    | 0.04761904762 | 0.04761904762 | 0.05555555556 |  | 0.7           | #DIV/0! |
| ZNF664-RF | 0.04761904762 | 0.04761904762 | 0.05555555556 |  | 0.7           | #DIV/0! |
| ZNF665    | 0.09523809524 | 0.09523809524 | 0.05555555556 |  | 1.473684211   | #DIV/0! |
| ZNF667    | 0.1428571429  | 0.1428571429  | 0.05555555556 |  | 2.333333333   | #DIV/0! |
| ZNF667-A  | 0.1428571429  | 0.1428571429  | 0.05555555556 |  | 2.333333333   | #DIV/0! |
| ZNF668    | 0.04761904762 | 0.04761904762 | 0             |  | inf           | #DIV/0! |
| ZNF669    | 0.1428571429  | 0.1428571429  | 0             |  | inf           | #DIV/0! |
| ZNF670    | 0.1428571429  | 0.1428571429  | 0             |  | inf           | #DIV/0! |
| ZNF670-ZN | 0.1428571429  | 0.1428571429  | 0.05555555556 |  | 2.333333333   | #DIV/0! |
| ZNF671    | 0.1428571429  | 0.1428571429  | 0.05555555556 |  | 2.333333333   | #DIV/0! |
| ZNF672    | 0.1428571429  | 0.1428571429  | 0             |  | inf           | #DIV/0! |
| ZNF675    | 0.09523809524 | 0.09523809524 | 0             |  | inf           | #DIV/0! |
| ZNF676    | 0.09523809524 | 0.09523809524 | 0             |  | inf           | #DIV/0! |
| ZNF677    | 0.09523809524 | 0.09523809524 | 0.05555555556 |  | 1.473684211   | #DIV/0! |
| ZNF678    | 0.1428571429  | 0.1428571429  | 0             |  | inf           | #DIV/0! |
| ZNF679    | 0.09523809524 | 0.09523809524 | 0.05555555556 |  | 1.473684211   | #DIV/0! |
| ZNF680    | 0.04761904762 | 0.04761904762 | 0.05555555556 |  | 0.7           | #DIV/0! |

|          |               |               |               |  |              |         |
|----------|---------------|---------------|---------------|--|--------------|---------|
| ZNF681   | 0.09523809524 | 0.09523809524 | 0             |  | inf          | #DIV/0! |
| ZNF682   | 0.1428571429  | 0.1428571429  | 0             |  | inf          | #DIV/0! |
| ZNF683   | 0.04761904762 | 0.04761904762 | 0.1111111111  |  | 0.325        | #DIV/0! |
| ZNF684   | 0.04761904762 | 0.04761904762 | 0.05555555556 |  | 0.7          | #DIV/0! |
| ZNF687   | 0.1904761905  | 0.1904761905  | 0.05555555556 |  | 3.294117647  | #DIV/0! |
| ZNF687-A | 0.1904761905  | 0.1904761905  | 0.05555555556 |  | 3.294117647  | #DIV/0! |
| ZNF688   | 0.04761904762 | 0.04761904762 | 0             |  | inf          | #DIV/0! |
| ZNF689   | 0.04761904762 | 0.04761904762 | 0             |  | inf          | #DIV/0! |
| ZNF69    | 0.1428571429  | 0.1428571429  | 0.1111111111  |  | 1.083333333  | #DIV/0! |
| ZNF691   | 0.04761904762 | 0.04761904762 | 0.05555555556 |  | 0.7          | #DIV/0! |
| ZNF692   | 0.1428571429  | 0.1428571429  | 0             |  | inf          | #DIV/0! |
| ZNF695   | 0.1428571429  | 0.1428571429  | 0.05555555556 |  | 2.333333333  | #DIV/0! |
| ZNF697   | 0.04761904762 | 0.04761904762 | 0.05555555556 |  | 0.7          | #DIV/0! |
| ZNF699   | 0.1428571429  | 0.1428571429  | 0.05555555556 |  | 2.333333333  | #DIV/0! |
| ZNF7     | 0.09523809524 | 0.09523809524 | 0.2222222222  |  | 0.2894736842 | #DIV/0! |
| ZNF700   | 0.1428571429  | 0.1428571429  | 0.1111111111  |  | 1.083333333  | #DIV/0! |
| ZNF701   | 0.09523809524 | 0.09523809524 | 0.05555555556 |  | 1.473684211  | #DIV/0! |
| ZNF702   | 0.09523809524 | 0.09523809524 | 0.05555555556 |  | 1.473684211  | #DIV/0! |
| ZNF703   | 0.04761904762 | 0.04761904762 | 0.1111111111  |  | 0.325        | #DIV/0! |
| ZNF704   | 0.1428571429  | 0.1428571429  | 0.1111111111  |  | 1.083333333  | #DIV/0! |
| ZNF705   | 0.04761904762 | 0.04761904762 | 0.1111111111  |  | 0.325        | #DIV/0! |
| ZNF705B  | 0.09523809524 | 0.09523809524 | 0.2222222222  |  | 0.2894736842 | #DIV/0! |
| ZNF705D  | 0.09523809524 | 0.09523809524 | 0.1111111111  |  | 0.6842105263 | #DIV/0! |
| ZNF705C  | 0.09523809524 | 0.09523809524 | 0.2222222222  |  | 0.2894736842 | #DIV/0! |
| ZNF706   | 0.1904761905  | 0.1904761905  | 0.1111111111  |  | 1.529411765  | #DIV/0! |
| ZNF707   | 0.04761904762 | 0.04761904762 | 0.1666666667  |  | 0.2          | #DIV/0! |
| ZNF708   | 0.09523809524 | 0.09523809524 | 0             |  | inf          | #DIV/0! |
| ZNF709   | 0.1428571429  | 0.1428571429  | 0.1111111111  |  | 1.083333333  | #DIV/0! |
| ZNF71    | 0.1428571429  | 0.1428571429  | 0.05555555556 |  | 2.333333333  | #DIV/0! |
| ZNF710   | 0.04761904762 | 0.04761904762 | 0.05555555556 |  | 0.7          | #DIV/0! |
| ZNF710-A | 0.04761904762 | 0.04761904762 | 0.05555555556 |  | 0.7          | #DIV/0! |
| ZNF713   | 0.3333333333  | 0.3333333333  | 0.2222222222  |  | 1.375        | #DIV/0! |
| ZNF714   | 0.09523809524 | 0.09523809524 | 0             |  | inf          | #DIV/0! |
| ZNF716   | 0.1428571429  | 0.1428571429  | 0.1666666667  |  | 0.6666666667 | #DIV/0! |
| ZNF717   | 0.04761904762 | 0.04761904762 | 0             |  | inf          | #DIV/0! |
| ZNF718   | 0.04761904762 | 0.04761904762 | 0             |  | inf          | #DIV/0! |
| ZNF720   | 0.04761904762 | 0.04761904762 | 0             |  | inf          | #DIV/0! |
| ZNF721   | 0.04761904762 | 0.04761904762 | 0             |  | inf          | #DIV/0! |
| ZNF722   | 0.09523809524 | 0.09523809524 | 0.05555555556 |  | 1.473684211  | #DIV/0! |
| ZNF723   | 0.09523809524 | 0.09523809524 | 0             |  | inf          | #DIV/0! |
| ZNF724   | 0.09523809524 | 0.09523809524 | 0             |  | inf          | #DIV/0! |
| ZNF726   | 0.09523809524 | 0.09523809524 | 0             |  | inf          | #DIV/0! |
| ZNF727   | 0.09523809524 | 0.09523809524 | 0.05555555556 |  | 1.473684211  | #DIV/0! |
| ZNF728   | 0.09523809524 | 0.09523809524 | 0             |  | inf          | #DIV/0! |
| ZNF729   | 0.09523809524 | 0.09523809524 | 0             |  | inf          | #DIV/0! |
| ZNF730   | 0.09523809524 | 0.09523809524 | 0             |  | inf          | #DIV/0! |
| ZNF732   | 0.04761904762 | 0.04761904762 | 0             |  | inf          | #DIV/0! |
| ZNF733   | 0.09523809524 | 0.09523809524 | 0.05555555556 |  | 1.473684211  | #DIV/0! |
| ZNF735   | 0.09523809524 | 0.09523809524 | 0.05555555556 |  | 1.473684211  | #DIV/0! |
| ZNF736   | 0.09523809524 | 0.09523809524 | 0.05555555556 |  | 1.473684211  | #DIV/0! |
| ZNF737   | 0.09523809524 | 0.09523809524 | 0             |  | inf          | #DIV/0! |

|         |               |               |               |  |              |         |
|---------|---------------|---------------|---------------|--|--------------|---------|
| ZNF738  | 0.09523809524 | 0.09523809524 | 0             |  | inf          | #DIV/0! |
| ZNF74   | 0.04761904762 | 0.04761904762 | 0.05555555556 |  | 0.7          | #DIV/0! |
| ZNF740  | 0.04761904762 | 0.04761904762 | 0.05555555556 |  | 0.7          | #DIV/0! |
| ZNF746  | 0.09523809524 | 0.09523809524 | 0.05555555556 |  | 1.473684211  | #DIV/0! |
| ZNF747  | 0.04761904762 | 0.04761904762 | 0             |  | inf          | #DIV/0! |
| ZNF749  | 0.1428571429  | 0.1428571429  | 0.05555555556 |  | 2.333333333  | #DIV/0! |
| ZNF75A  | 0.04761904762 | 0.04761904762 | 0.1111111111  |  | 0.325        | #DIV/0! |
| ZNF76   | 0.04761904762 | 0.04761904762 | 0             |  | inf          | #DIV/0! |
| ZNF761  | 0.09523809524 | 0.09523809524 | 0.05555555556 |  | 1.473684211  | #DIV/0! |
| ZNF763  | 0.1428571429  | 0.1428571429  | 0.1111111111  |  | 1.083333333  | #DIV/0! |
| ZNF764  | 0.04761904762 | 0.04761904762 | 0             |  | inf          | #DIV/0! |
| ZNF765  | 0.09523809524 | 0.09523809524 | 0.05555555556 |  | 1.473684211  | #DIV/0! |
| 765-ZN  | 0.09523809524 | 0.09523809524 | 0.05555555556 |  | 1.473684211  | #DIV/0! |
| ZNF766  | 0.09523809524 | 0.09523809524 | 0.05555555556 |  | 1.473684211  | #DIV/0! |
| ZNF767  | 0.09523809524 | 0.09523809524 | 0.05555555556 |  | 1.473684211  | #DIV/0! |
| ZNF768  | 0.04761904762 | 0.04761904762 | 0             |  | inf          | #DIV/0! |
| ZNF77   | 0.09523809524 | 0.09523809524 | 0.05555555556 |  | 1.473684211  | #DIV/0! |
| ZNF771  | 0.04761904762 | 0.04761904762 | 0             |  | inf          | #DIV/0! |
| ZNF772  | 0.1428571429  | 0.1428571429  | 0.05555555556 |  | 2.333333333  | #DIV/0! |
| ZNF773  | 0.1428571429  | 0.1428571429  | 0.05555555556 |  | 2.333333333  | #DIV/0! |
| ZNF774  | 0.04761904762 | 0.04761904762 | 0.05555555556 |  | 0.7          | #DIV/0! |
| ZNF775  | 0.09523809524 | 0.09523809524 | 0.05555555556 |  | 1.473684211  | #DIV/0! |
| ZNF776  | 0.1428571429  | 0.1428571429  | 0.05555555556 |  | 2.333333333  | #DIV/0! |
| ZNF777  | 0.09523809524 | 0.09523809524 | 0.05555555556 |  | 1.473684211  | #DIV/0! |
| ZNF778  | 0.09523809524 | 0.09523809524 | 0             |  | inf          | #DIV/0! |
| ZNF780A | 0.04761904762 | 0.04761904762 | 0.05555555556 |  | 0.7          | #DIV/0! |
| ZNF780B | 0.04761904762 | 0.04761904762 | 0.05555555556 |  | 0.7          | #DIV/0! |
| ZNF781  | 0.04761904762 | 0.04761904762 | 0.05555555556 |  | 0.7          | #DIV/0! |
| ZNF782  | 0.04761904762 | 0.04761904762 | 0             |  | inf          | #DIV/0! |
| ZNF783  | 0.09523809524 | 0.09523809524 | 0.05555555556 |  | 1.473684211  | #DIV/0! |
| ZNF784  | 0.09523809524 | 0.09523809524 | 0.05555555556 |  | 1.473684211  | #DIV/0! |
| ZNF785  | 0.04761904762 | 0.04761904762 | 0             |  | inf          | #DIV/0! |
| ZNF786  | 0.09523809524 | 0.09523809524 | 0.05555555556 |  | 1.473684211  | #DIV/0! |
| ZNF787  | 0.1428571429  | 0.1428571429  | 0.05555555556 |  | 2.333333333  | #DIV/0! |
| ZNF788  | 0.1428571429  | 0.1428571429  | 0.1111111111  |  | 1.083333333  | #DIV/0! |
| ZNF789  | 0.04761904762 | 0.04761904762 | 0.05555555556 |  | 0.7          | #DIV/0! |
| ZNF79   | 0.09523809524 | 0.09523809524 | 0.05555555556 |  | 1.473684211  | #DIV/0! |
| ZNF790  | 0.04761904762 | 0.04761904762 | 0.05555555556 |  | 0.7          | #DIV/0! |
| 790-A   | 0.04761904762 | 0.04761904762 | 0.05555555556 |  | 0.7          | #DIV/0! |
| ZNF791  | 0.1428571429  | 0.1428571429  | 0.1111111111  |  | 1.083333333  | #DIV/0! |
| ZNF792  | 0.04761904762 | 0.04761904762 | 0.05555555556 |  | 0.7          | #DIV/0! |
| ZNF793  | 0.04761904762 | 0.04761904762 | 0.05555555556 |  | 0.7          | #DIV/0! |
| 793-A   | 0.04761904762 | 0.04761904762 | 0.05555555556 |  | 0.7          | #DIV/0! |
| ZNF799  | 0.1428571429  | 0.1428571429  | 0.1111111111  |  | 1.083333333  | #DIV/0! |
| ZNF8    | 0.1428571429  | 0.1428571429  | 0.05555555556 |  | 2.333333333  | #DIV/0! |
| 8-ERV   | 0.1428571429  | 0.1428571429  | 0.05555555556 |  | 2.333333333  | #DIV/0! |
| ZNF80   | 0.09523809524 | 0.09523809524 | 0.05555555556 |  | 1.473684211  | #DIV/0! |
| ZNF800  | 0.04761904762 | 0.04761904762 | 0.05555555556 |  | 0.7          | #DIV/0! |
| ZNF804A | 0             | 0             | 0.05555555556 |  | 0            | #DIV/0! |
| ZNF804B | 0.09523809524 | 0.09523809524 | 0.1111111111  |  | 0.6842105263 | #DIV/0! |
| ZNF805  | 0.1428571429  | 0.1428571429  | 0.05555555556 |  | 2.333333333  | #DIV/0! |

|        |               |               |               |  |              |         |
|--------|---------------|---------------|---------------|--|--------------|---------|
| ZNF806 | 0             | 0             | 0.05555555556 |  | 0            | #DIV/0! |
| ZNF807 | 0.04761904762 | 0.04761904762 | 0.05555555556 |  | 0.7          | #DIV/0! |
| ZNF808 | 0.09523809524 | 0.09523809524 | 0.05555555556 |  | 1.473684211  | #DIV/0! |
| ZNF812 | 0.1428571429  | 0.1428571429  | 0.1111111111  |  | 1.083333333  | #DIV/0! |
| ZNF813 | 0.09523809524 | 0.09523809524 | 0.05555555556 |  | 1.473684211  | #DIV/0! |
| ZNF814 | 0.1428571429  | 0.1428571429  | 0.05555555556 |  | 2.333333333  | #DIV/0! |
| ZNF815 | 0.04761904762 | 0.04761904762 | 0.1666666667  |  | 0.2          | #DIV/0! |
| ZNF816 | 0.09523809524 | 0.09523809524 | 0.05555555556 |  | 1.473684211  | #DIV/0! |
| ZNF816 | 0.09523809524 | 0.09523809524 | 0.05555555556 |  | 1.473684211  | #DIV/0! |
| ZNF818 | 0.09523809524 | 0.09523809524 | 0.05555555556 |  | 1.473684211  | #DIV/0! |
| ZNF821 | 0.04761904762 | 0.04761904762 | 0             |  | inf          | #DIV/0! |
| ZNF823 | 0.1428571429  | 0.1428571429  | 0.1111111111  |  | 1.083333333  | #DIV/0! |
| ZNF826 | 0.1428571429  | 0.1428571429  | 0             |  | inf          | #DIV/0! |
| ZNF827 | 0             | 0             | 0.05555555556 |  | 0            | #DIV/0! |
| ZNF829 | 0.04761904762 | 0.04761904762 | 0.05555555556 |  | 0.7          | #DIV/0! |
| ZNF83  | 0.09523809524 | 0.09523809524 | 0.05555555556 |  | 1.473684211  | #DIV/0! |
| ZNF831 | 0.1428571429  | 0.1428571429  | 0.1666666667  |  | 0.6666666667 | #DIV/0! |
| ZNF833 | 0.1428571429  | 0.1428571429  | 0.1111111111  |  | 1.083333333  | #DIV/0! |
| ZNF835 | 0.1428571429  | 0.1428571429  | 0.05555555556 |  | 2.333333333  | #DIV/0! |
| ZNF836 | 0.09523809524 | 0.09523809524 | 0.05555555556 |  | 1.473684211  | #DIV/0! |
| ZNF837 | 0.1428571429  | 0.1428571429  | 0.05555555556 |  | 2.333333333  | #DIV/0! |
| ZNF84  | 0.09523809524 | 0.09523809524 | 0.05555555556 |  | 1.473684211  | #DIV/0! |
| ZNF841 | 0.09523809524 | 0.09523809524 | 0.05555555556 |  | 1.473684211  | #DIV/0! |
| ZNF843 | 0.04761904762 | 0.04761904762 | 0             |  | inf          | #DIV/0! |
| ZNF844 | 0.1428571429  | 0.1428571429  | 0.1111111111  |  | 1.083333333  | #DIV/0! |
| ZNF845 | 0.09523809524 | 0.09523809524 | 0.05555555556 |  | 1.473684211  | #DIV/0! |
| ZNF846 | 0.1428571429  | 0.1428571429  | 0.1111111111  |  | 1.083333333  | #DIV/0! |
| ZNF847 | 0.1428571429  | 0.1428571429  | 0             |  | inf          | #DIV/0! |
| ZNF85  | 0.09523809524 | 0.09523809524 | 0             |  | inf          | #DIV/0! |
| ZNF850 | 0.04761904762 | 0.04761904762 | 0.05555555556 |  | 0.7          | #DIV/0! |
| ZNF853 | 0.04761904762 | 0.04761904762 | 0.1666666667  |  | 0.2          | #DIV/0! |
| ZNF860 | 0.09523809524 | 0.09523809524 | 0             |  | inf          | #DIV/0! |
| ZNF862 | 0.09523809524 | 0.09523809524 | 0.05555555556 |  | 1.473684211  | #DIV/0! |
| ZNF865 | 0.09523809524 | 0.09523809524 | 0.05555555556 |  | 1.473684211  | #DIV/0! |
| ZNF875 | 0.04761904762 | 0.04761904762 | 0.05555555556 |  | 0.7          | #DIV/0! |
| ZNF876 | 0.04761904762 | 0.04761904762 | 0             |  | inf          | #DIV/0! |
| ZNF878 | 0.1428571429  | 0.1428571429  | 0.1111111111  |  | 1.083333333  | #DIV/0! |
| ZNF879 | 0.09523809524 | 0.09523809524 | 0.05555555556 |  | 1.473684211  | #DIV/0! |
| ZNF880 | 0.09523809524 | 0.09523809524 | 0.05555555556 |  | 1.473684211  | #DIV/0! |
| ZNF883 | 0.04761904762 | 0.04761904762 | 0.05555555556 |  | 0.7          | #DIV/0! |
| ZNF888 | 0.09523809524 | 0.09523809524 | 0.05555555556 |  | 1.473684211  | #DIV/0! |
| ZNF890 | 0.04761904762 | 0.04761904762 | 0.1666666667  |  | 0.2          | #DIV/0! |
| ZNF891 | 0.09523809524 | 0.09523809524 | 0.05555555556 |  | 1.473684211  | #DIV/0! |
| ZNF90  | 0.1428571429  | 0.1428571429  | 0             |  | inf          | #DIV/0! |
| ZNF91  | 0.09523809524 | 0.09523809524 | 0             |  | inf          | #DIV/0! |
| ZNF92  | 0.04761904762 | 0.04761904762 | 0.1111111111  |  | 0.325        | #DIV/0! |
| ZNF93  | 0.1428571429  | 0.1428571429  | 0.05555555556 |  | 2.333333333  | #DIV/0! |
| ZNF98  | 0.09523809524 | 0.09523809524 | 0             |  | inf          | #DIV/0! |
| ZNF99  | 0.09523809524 | 0.09523809524 | 0             |  | inf          | #DIV/0! |
| ZNFX1  | 0.09523809524 | 0.09523809524 | 0.1666666667  |  | 0.4210526316 | #DIV/0! |
| ZNHIT1 | 0.04761904762 | 0.04761904762 | 0.05555555556 |  | 0.7          | #DIV/0! |

|         |               |               |               |  |              |         |
|---------|---------------|---------------|---------------|--|--------------|---------|
| ZNHIT3  | 0.04761904762 | 0.04761904762 | 0             |  | inf          | #DIV/0! |
| ZNHIT6  | 0.04761904762 | 0.04761904762 | 0.05555555556 |  | 0.7          | #DIV/0! |
| ZNRF1   | 0.04761904762 | 0.04761904762 | 0             |  | inf          | #DIV/0! |
| ZNRF2   | 0.04761904762 | 0.04761904762 | 0.1666666667  |  | 0.2          | #DIV/0! |
| ZNRF2P  | 0.04761904762 | 0.04761904762 | 0.1666666667  |  | 0.2          | #DIV/0! |
| ZNRF2P0 | 0.04761904762 | 0.04761904762 | 0.1666666667  |  | 0.2          | #DIV/0! |
| ZNRF3   | 0.04761904762 | 0.04761904762 | 0.1111111111  |  | 0.325        | #DIV/0! |
| NRF3-A0 | 0.04761904762 | 0.04761904762 | 0.1111111111  |  | 0.325        | #DIV/0! |
| ZNRF4   | 0.1428571429  | 0.1428571429  | 0.05555555556 |  | 2.333333333  | #DIV/0! |
| ZP2     | 0.04761904762 | 0.04761904762 | 0             |  | inf          | #DIV/0! |
| ZP3     | 0.09523809524 | 0.09523809524 | 0.1111111111  |  | 0.6842105263 | #DIV/0! |
| ZP4     | 0.1428571429  | 0.1428571429  | 0             |  | inf          | #DIV/0! |
| ZPBP    | 0.09523809524 | 0.09523809524 | 0.2222222222  |  | 0.2894736842 | #DIV/0! |
| ZPBP2   | 0.09523809524 | 0.09523809524 | 0             |  | inf          | #DIV/0! |
| ZPLD1   | 0.09523809524 | 0.09523809524 | 0.05555555556 |  | 1.473684211  | #DIV/0! |
| ZRANB1  | 0.2380952381  | 0.2380952381  | 0.05555555556 |  | 4.375        | #DIV/0! |
| ZRANB2  | 0.04761904762 | 0.04761904762 | 0.05555555556 |  | 0.7          | #DIV/0! |
| ANB2-A0 | 0.04761904762 | 0.04761904762 | 0.05555555556 |  | 0.7          | #DIV/0! |
| ANB2-A0 | 0.04761904762 | 0.04761904762 | 0.05555555556 |  | 0.7          | #DIV/0! |
| ZRANB3  | 0.04761904762 | 0.04761904762 | 0.05555555556 |  | 0.7          | #DIV/0! |
| ZSCAN1  | 0.1428571429  | 0.1428571429  | 0.05555555556 |  | 2.333333333  | #DIV/0! |
| ZSCAN10 | 0.04761904762 | 0.04761904762 | 0.1111111111  |  | 0.325        | #DIV/0! |
| ZSCAN10 | 0.1428571429  | 0.1428571429  | 0.05555555556 |  | 2.333333333  | #DIV/0! |
| ZSCAN20 | 0.04761904762 | 0.04761904762 | 0.05555555556 |  | 0.7          | #DIV/0! |
| ZSCAN20 | 0.04761904762 | 0.04761904762 | 0             |  | inf          | #DIV/0! |
| ZSCAN20 | 0.04761904762 | 0.04761904762 | 0.05555555556 |  | 0.7          | #DIV/0! |
| ZSCAN20 | 0.1428571429  | 0.1428571429  | 0.05555555556 |  | 2.333333333  | #DIV/0! |
| ZSCAN20 | 0.04761904762 | 0.04761904762 | 0.05555555556 |  | 0.7          | #DIV/0! |
| ZSCAN30 | 0.09523809524 | 0.09523809524 | 0             |  | inf          | #DIV/0! |
| ZSCAN30 | 0.04761904762 | 0.04761904762 | 0.1111111111  |  | 0.325        | #DIV/0! |
| ZSCAN40 | 0.1428571429  | 0.1428571429  | 0.05555555556 |  | 2.333333333  | #DIV/0! |
| SCAN50  | 0.1428571429  | 0.1428571429  | 0.05555555556 |  | 2.333333333  | #DIV/0! |
| SCAN50  | 0.1428571429  | 0.1428571429  | 0.05555555556 |  | 2.333333333  | #DIV/0! |
| SCAN50  | 0.1428571429  | 0.1428571429  | 0.05555555556 |  | 2.333333333  | #DIV/0! |
| ZSWIM1  | 0.1428571429  | 0.1428571429  | 0.1666666667  |  | 0.6666666667 | #DIV/0! |
| ZSWIM2  | 0             | 0             | 0.05555555556 |  | 0            | #DIV/0! |
| ZSWIM3  | 0.1428571429  | 0.1428571429  | 0.1666666667  |  | 0.6666666667 | #DIV/0! |
| ZSWIM4  | 0.1428571429  | 0.1428571429  | 0.1111111111  |  | 1.083333333  | #DIV/0! |
| ZSWIM5  | 0.04761904762 | 0.04761904762 | 0.05555555556 |  | 0.7          | #DIV/0! |
| ZSWIM6  | 0.04761904762 | 0.04761904762 | 0             |  | inf          | #DIV/0! |
| ZSWIM7  | 0.04761904762 | 0.04761904762 | 0.05555555556 |  | 0.7          | #DIV/0! |
| ZSWIM8  | 0.1904761905  | 0.1904761905  | 0.05555555556 |  | 3.294117647  | #DIV/0! |
| WIM8-A0 | 0.1904761905  | 0.1904761905  | 0.05555555556 |  | 3.294117647  | #DIV/0! |
| ZSWIM9  | 0.09523809524 | 0.09523809524 | 0.1111111111  |  | 0.6842105263 | #DIV/0! |
| ZWILCF  | 0.04761904762 | 0.04761904762 | 0.05555555556 |  | 0.7          | #DIV/0! |
| ZWINT0  | 0.09523809524 | 0.09523809524 | 0.05555555556 |  | 1.473684211  | #DIV/0! |
| ZXDC    | 0.04761904762 | 0.04761904762 | 0.05555555556 |  | 0.7          | #DIV/0! |
| ZYG11A  | 0.04761904762 | 0.04761904762 | 0.05555555556 |  | 0.7          | #DIV/0! |
| ZYG11B  | 0.04761904762 | 0.04761904762 | 0.05555555556 |  | 0.7          | #DIV/0! |
| ZYX     | 0.04761904762 | 0.04761904762 | 0.05555555556 |  | 0.7          | #DIV/0! |
| ZZEF1   | 0             | 0             | 0.1111111111  |  | 0            | #DIV/0! |

|            |               |               |               |  |     |         |
|------------|---------------|---------------|---------------|--|-----|---------|
| <b>ZZZ</b> | 0.04761904762 | 0.04761904762 | 0.05555555556 |  | 0.7 | #DIV/0! |
|------------|---------------|---------------|---------------|--|-----|---------|

| <b>Pvalue</b> |
|---------------|
| 0.6256684492  |
| 0.6256684492  |
| 1             |
| 0.5588235294  |
| 0.5588235294  |
| 0.5588235294  |
| 0.5588235294  |
| 1             |
| 0.0637254902  |
| 0.6256684492  |
| 1             |
| 1             |
| 1             |
| 1             |
| 1             |
| 1             |
| 1             |
| 1             |
| 0.5588235294  |
| 0.5588235294  |
| 1             |
| 0.4166666667  |
| 1             |
| 0.4166666667  |
| 0.4166666667  |
| 1             |
| 1             |
| 1             |
| 0.6256684492  |
| 1             |
| 1             |
| 0.376114082   |
| 1             |
| 0.5588235294  |
| 1             |
| 1             |
| 1             |
| 0.5           |
| 1             |
| 1             |
| 1             |
| 0.4166666667  |
| 0.209972112   |
| 0.209972112   |
| 0.6256684492  |
| 0.209972112   |
| 1             |
| 1             |
| 1             |
| 1             |



|              |
|--------------|
| 1            |
| 1            |
| 1            |
| 1            |
| 0.25         |
| 1            |
| 1            |
| 0.1379790553 |
| 1            |
| 0.5588235294 |
| 1            |
| 1            |
| 1            |
| 1            |
| 0.5588235294 |
| 0.25         |
| 0.5          |
| 0.376114082  |
| 0.6256684492 |
| 1            |
| 0.5          |
| 1            |
| 1            |
| 1            |
| 1            |
| 1            |
| 0.4166666667 |
| 1            |
| 0.6256684492 |
| 0.5588235294 |
| 0.4166666667 |
| 0.4166666667 |
| 0.4166666667 |
| 1            |
| 1            |
| 1            |
| 0.376114082  |
| 1            |
| 1            |
| 1            |
| 0.4166666667 |
| 1            |
| 0.4178238744 |
| 1            |
| 0.4166666667 |
| 1            |
| 0.4166666667 |
| 1            |
| 0.5588235294 |
| 0.4166666667 |
| 1            |

|              |
|--------------|
| 1            |
| 1            |
| 1            |
| 1            |
| 0.25         |
| 1            |
| 1            |
| 1            |
| 0.25         |
| 0.376114082  |
| 1            |
| 0.166666667  |
| 1            |
| 0.416666667  |
| 0.3666803232 |
| 1            |
| 1            |
| 1            |
| 0.416666667  |
| 0.166666667  |
| 0.6256684492 |
| 1            |
| 0.416666667  |
| 1            |
| 0.166666667  |
| 0.3666803232 |
| 0.416666667  |
| 1            |
| 0.416666667  |
| 0.6256684492 |
| 0.166666667  |
| 0.6256684492 |
| 0.6256684492 |
| 0.25         |
| 1            |
| 0.25         |
| 1            |
| 1            |
| 0.6256684492 |
| 1            |
| 0.6256684492 |
| 1            |
| 1            |
| 0.416666667  |
| 0.25         |
| 1            |
| 0.416666667  |
| 0.6256684492 |
| 0.5          |
| 1            |
| 1            |

|              |
|--------------|
| 0.166666667  |
| 0.416666667  |
| 0.5          |
| 1            |
| 1            |
| 0.416666667  |
| 0.5          |
| 0.5          |
| 0.5          |
| 0.416666667  |
| 0.6773654476 |
| 1            |
| 1            |
| 0.416666667  |
| 0.416666667  |
| 0.416666667  |
| 0.416666667  |
| 1            |
| 1            |
| 0.6256684492 |
| 1            |
| 0.6256684492 |
| 0.166666667  |
| 0.5588235294 |
| 1            |
| 0.6256684492 |
| 0.5          |
| 0.5          |
| 0.416666667  |
| 0.416666667  |
| 0.6256684492 |
| 1            |
| 1            |
| 1            |
| 1            |
| 1            |
| 0.5588235294 |
| 1            |
| 0.25         |
| 0.376114082  |
| 1            |
| 1            |
| 0.25         |
| 0.6773654476 |
| 0.6773654476 |
| 0.2869875223 |
| 1            |
| 1            |
| 1            |
| 0.5588235294 |
| 1            |

|              |
|--------------|
| 0.416666667  |
| 1            |
| 0.376114082  |
| 1            |
| 1            |
| 1            |
| 1            |
| 0.6256684492 |
| 0.25         |
| 1            |
| 1            |
| 0.6256684492 |
| 0.166666667  |
| 0.416666667  |
| 0.416666667  |
| 0.416666667  |
| 1            |
| 1            |
| 1            |
| 1            |
| 0.4178238744 |
| 1            |
| 1            |
| 0.416666667  |
| 0.376114082  |
| 0.416666667  |
| 1            |
| 0.416666667  |
| 0.416666667  |
| 1            |
| 1            |
| 1            |
| 1            |
| 1            |
| 0.6773654476 |
| 1            |
| 0.416666667  |
| 1            |
| 1            |
| 0.5          |
| 0.3666803232 |
| 1            |
| 0.416666667  |
| 1            |
| 1            |
| 0.166666667  |
| 1            |
| 1            |
| 0.416666667  |
| 0.5588235294 |
| 0.416666667  |

|              |
|--------------|
| 1            |
| 1            |
| 0.376114082  |
| 1            |
| 1            |
| 1            |
| 1            |
| 0.5588235294 |
| 0.1247771836 |
| 1            |
| 0.5588235294 |
| 0.5588235294 |
| 0.6256684492 |
| 0.5588235294 |
| 1            |
| 0.5          |
| 0.1666666667 |
| 1            |
| 0.5          |
| 1            |
| 1            |
| 1            |
| 1            |
| 1            |
| 1            |
| 0.25         |
| 0.5588235294 |
| 1            |
| 1            |
| 1            |
| 1            |
| 1            |
| 1            |
| 1            |
| 1            |
| 1            |
| 0.376114082  |
| 0.376114082  |
| 1            |
| 0.2869875223 |
| 1            |
| 1            |
| 0.5588235294 |
| 0.5588235294 |
| 0.5588235294 |
| 1            |
| 1            |
| 1            |
| 0.2869875223 |
| 0.1379790553 |
| 0.25         |
| 0.4166666667 |

|              |
|--------------|
| 0.416666667  |
| 1            |
| 1            |
| 1            |
| 0.5588235294 |
| 0.5588235294 |
| 0.5          |
| 0.5588235294 |
| 1            |
| 0.416666667  |
| 0.6256684492 |
| 0.6256684492 |
| 0.1247771836 |
| 0.1247771836 |
| 0.5588235294 |
| 0.2869875223 |
| 0.5588235294 |
| 1            |
| 1            |
| 0.6256684492 |
| 1            |
| 1            |
| 0.6256684492 |
| 1            |
| 1            |
| 1            |
| 1            |
| 1            |
| 1            |
| 1            |
| 1            |
| 1            |
| 1            |
| 1            |
| 1            |
| 1            |
| 1            |
| 1            |
| 1            |
| 1            |
| 0.416666667  |
| 0.416666667  |
| 0.416666667  |
| 0.416666667  |
| 0.416666667  |
| 0.416666667  |
| 0.416666667  |
| 0.6773654476 |
| 0.416666667  |
| 0.6773654476 |
| 1            |
| 1            |
| 0.25         |

|              |
|--------------|
| 0.2869875223 |
| 0.6256684492 |
| 0.376114082  |
| 0.1666666667 |
| 1            |
| 0.6295677362 |
| 0.6295677362 |
| 1            |
| 0.2869875223 |
| 0.25         |
| 0.5588235294 |
| 0.5588235294 |
| 1            |
| 1            |
| 1            |
| 1            |
| 1            |
| 1            |
| 1            |
| 0.5588235294 |
| 1            |
| 0.376114082  |
| 0.6256684492 |
| 0.1666666667 |
| 1            |
| 0.6256684492 |
| 1            |
| 0.4178238744 |
| 0.1666666667 |
| 0.6256684492 |
| 1            |
| 0.2869875223 |
| 0.5588235294 |
| 1            |
| 0.376114082  |
| 0.4166666667 |
| 0.4166666667 |
| 0.4166666667 |
| 1            |
| 1            |
| 0.5          |
| 1            |
| 1            |
| 1            |
| 1            |
| 0.4166666667 |
| 0.4166666667 |
| 0.4166666667 |
| 0.4166666667 |
| 0.6256684492 |
| 0.6256684492 |

|              |
|--------------|
| 0.6256684492 |
| 0.6256684492 |
| 0.6256684492 |
| 1            |
| 0.6256684492 |
| 0.376114082  |
| 1            |
| 1            |
| 0.6256684492 |
| 1            |
| 1            |
| 0.4166666667 |
| 1            |
| 0.4166666667 |
| 1            |
| 1            |
| 0.4166666667 |
| 1            |
| 1            |
| 0.5588235294 |
| 0.5588235294 |
| 0.1379790553 |
| 1            |
| 0.1379790553 |
| 1            |
| 1            |
| 1            |
| 0.6256684492 |
| 0.5588235294 |
| 1            |
| 0.1666666667 |
| 0.1379790553 |
| 0.1379790553 |
| 0.1666666667 |
| 0.6256684492 |
| 0.25         |
| 0.4166666667 |
| 1            |
| 0.5588235294 |
| 0.4166666667 |
| 1            |
| 0.6256684492 |
| 0.4166666667 |
| 1            |
| 1            |
| 1            |
| 0.5588235294 |
| 0.1379790553 |
| 0.4166666667 |
| 1            |
| 1            |



|              |
|--------------|
| 1            |
| 0.5588235294 |
| 0.6256684492 |
| 1            |
| 1            |
| 0.5          |
| 1            |
| 0.25         |
| 0.4166666667 |
| 0.2869875223 |
| 0.4166666667 |
| 0.5588235294 |
| 0.4166666667 |
| 0.6256684492 |
| 0.4166666667 |
| 1            |
| 1            |
| 1            |
| 1            |
| 1            |
| 1            |
| 1            |
| 1            |
| 0.5          |
| 0.5          |
| 1            |
| 1            |
| 1            |
| 0.5588235294 |
| 0.5          |
| 1            |
| 1            |
| 0.5588235294 |
| 1            |
| 1            |
| 1            |
| 1            |
| 1            |
| 1            |
| 1            |
| 0.0637254902 |
| 0.0637254902 |
| 0.0637254902 |
| 0.0637254902 |
| 0.2869875223 |
| 0.0637254902 |
| 1            |
| 0.2869875223 |
| 0.5588235294 |
| 1            |
| 0.5588235294 |

|              |
|--------------|
| 0.5588235294 |
| 1            |
| 1            |
| 0.6256684492 |
| 1            |
| 1            |
| 1            |
| 1            |
| 1            |
| 1            |
| 0.25         |
| 0.4166666667 |
| 1            |
| 1            |
| 1            |
| 1            |
| 1            |
| 1            |
| 1            |
| 0.1666666667 |
| 1            |
| 1            |
| 0.5588235294 |
| 0.4166666667 |
| 0.5          |
| 1            |
| 0.25         |
| 1            |
| 1            |
| 1            |
| 1            |
| 1            |
| 1            |
| 1            |
| 0.1666666667 |
| 1            |
| 1            |
| 1            |
| 1            |
| 0.6256684492 |
| 1            |
| 0.4166666667 |
| 1            |
| 0.4166666667 |
| 0.4166666667 |
| 1            |
| 1            |
| 0.6256684492 |
| 0.4166666667 |
| 0.4166666667 |
| 0.4166666667 |
| 0.4166666667 |

|              |
|--------------|
| 0.416666667  |
| 0.416666667  |
| 0.416666667  |
| 0.416666667  |
| 0.166666667  |
| 0.416666667  |
| 0.416666667  |
| 0.6256684492 |
| 0.416666667  |
| 0.416666667  |
| 0.416666667  |
| 0.416666667  |
| 0.5          |
| 1            |
| 0.5588235294 |
| 0.416666667  |
| 0.416666667  |
| 1            |
| 1            |
| 1            |
| 0.5588235294 |
| 1            |
| 1            |
| 0.416666667  |
| 1            |
| 1            |
| 0.5588235294 |
| 0.416666667  |
| 1            |
| 1            |
| 1            |
| 1            |
| 1            |
| 0.5          |
| 0.416666667  |
| 1            |
| 0.6256684492 |
| 1            |
| 1            |
| 0.1379790553 |
| 0.25         |
| 1            |
| 1            |
| 1            |
| 1            |
| 1            |
| 1            |
| 0.2869875223 |
| 1            |
| 1            |
| 0.416666667  |

|              |
|--------------|
| 0.416666667  |
| 1            |
| 0.6256684492 |
| 0.376114082  |
| 0.416666667  |
| 0.6256684492 |
| 0.5588235294 |
| 0.166666667  |
| 0.25         |
| 1            |
| 1            |
| 1            |
| 0.25         |
| 1            |
| 1            |
| 0.6256684492 |
| 1            |
| 0.5588235294 |
| 1            |
| 1            |
| 0.6295677362 |
| 0.416666667  |
| 0.5588235294 |
| 0.416666667  |
| 1            |
| 1            |
| 1            |
| 0.5          |
| 0.166666667  |
| 1            |
| 1            |
| 1            |
| 0.5588235294 |
| 1            |
| 1            |
| 1            |
| 0.1379790553 |
| 0.416666667  |
| 1            |
| 0.5          |
| 0.5          |
| 0.166666667  |
| 0.416666667  |
| 1            |
| 1            |
| 0.6256684492 |
| 1            |
| 1            |
| 1            |
| 0.6256684492 |
| 1            |

|              |
|--------------|
| 0.25         |
| 0.6940287188 |
| 1            |
| 1            |
| 0.376114082  |
| 0.6940287188 |
| 0.209972112  |
| 0.209972112  |
| 1            |
| 0.1666666667 |
| 1            |
| 0.6773654476 |
| 0.1666666667 |
| 1            |
| 1            |
| 1            |
| 1            |
| 1            |
| 1            |
| 1            |
| 1            |
| 1            |
| 1            |
| 0.4166666667 |
| 1            |
| 0.6256684492 |
| 1            |
| 1            |
| 1            |
| 1            |
| 1            |
| 1            |
| 0.6256684492 |
| 0.1666666667 |
| 0.1666666667 |
| 0.25         |
| 0.4166666667 |
| 0.1666666667 |
| 0.4166666667 |
| 0.1666666667 |
| 0.5          |
| 0.5          |
| 0.4166666667 |
| 0.4166666667 |
| 0.25         |
| 1            |
| 0.4166666667 |
| 1            |
| 0.4166666667 |
| 0.1666666667 |
| 1            |
| 1            |

|              |
|--------------|
| 0.4178238744 |
| 0.2869875223 |
| 1            |
| 1            |
| 0.1666666667 |
| 1            |
| 1            |
| 1            |
| 1            |
| 1            |
| 1            |
| 1            |
| 1            |
| 0.1379790553 |
| 1            |
| 0.5588235294 |
| 1            |
| 1            |
| 0.4166666667 |
| 1            |
| 1            |
| 1            |
| 1            |
| 1            |
| 1            |
| 0.4166666667 |
| 1            |
| 0.376114082  |
| 1            |
| 0.4166666667 |
| 1            |
| 0.6256684492 |
| 0.6256684492 |
| 0.4166666667 |
| 0.4166666667 |
| 0.25         |
| 1            |
| 1            |
| 0.4166666667 |
| 1            |
| 0.6256684492 |
| 1            |
| 1            |
| 0.4166666667 |
| 0.4166666667 |
| 0.376114082  |
| 0.6256684492 |
| 0.6256684492 |
| 0.376114082  |
| 0.1379790553 |
| 0.1379790553 |

|              |
|--------------|
| 1            |
| 1            |
| 1            |
| 1            |
| 1            |
| 0.416666667  |
| 0.416666667  |
| 0.416666667  |
| 0.5588235294 |
| 0.5588235294 |
| 1            |
| 1            |
| 1            |
| 1            |
| 0.416666667  |
| 1            |
| 1            |
| 0.5          |
| 0.6256684492 |
| 1            |
| 1            |
| 1            |
| 1            |
| 0.376114082  |
| 0.6295677362 |
| 1            |
| 1            |
| 1            |
| 1            |
| 0.6256684492 |
| 1            |
| 1            |
| 1            |
| 0.376114082  |
| 0.2869875223 |
| 1            |
| 0.416666667  |
| 1            |
| 1            |
| 1            |
| 0.376114082  |
| 1            |
| 1            |
| 1            |
| 1            |
| 0.4178238744 |
| 0.4178238744 |
| 0.25         |
| 0.5          |
| 1            |
| 0.376114082  |

|              |
|--------------|
| 1            |
| 0.416666667  |
| 1            |
| 0.376114082  |
| 0.25         |
| 0.416666667  |
| 0.5588235294 |
| 0.416666667  |
| 0.5588235294 |
| 0.5588235294 |
| 0.5588235294 |
| 0.5588235294 |
| 0.5588235294 |
| 0.5588235294 |
| 0.5588235294 |
| 0.5588235294 |
| 0.5588235294 |
| 1            |
| 1            |
| 1            |
| 1            |
| 1            |
| 1            |
| 0.6256684492 |
| 1            |
| 0.6256684492 |
| 1            |
| 0.166666667  |
| 0.166666667  |
| 0.166666667  |
| 0.166666667  |
| 0.166666667  |
| 0.166666667  |
| 1            |
| 1            |
| 1            |
| 0.5588235294 |
| 0.25         |
| 0.5          |
| 1            |
| 0.1247771836 |
| 0.5588235294 |
| 1            |
| 0.5588235294 |
| 0.376114082  |
| 0.416666667  |
| 0.416666667  |
| 1            |
| 1            |
| 1            |
| 1            |



|              |
|--------------|
| 1            |
| 1            |
| 1            |
| 0.209972112  |
| 0.6940287188 |
| 1            |
| 1            |
| 1            |
| 0.2869875223 |
| 1            |
| 0.25         |
| 1            |
| 0.5          |
| 0.5          |
| 1            |
| 1            |
| 0.4178238744 |
| 0.4166666667 |
| 0.0637254902 |
| 0.6773654476 |
| 0.6295677362 |
| 0.4166666667 |
| 1            |
| 0.4178238744 |
| 0.6256684492 |
| 1            |
| 0.4166666667 |
| 0.4166666667 |
| 0.209972112  |
| 0.4166666667 |
| 1            |
| 0.25         |
| 0.25         |
| 1            |
| 1            |
| 1            |
| 0.4166666667 |
| 0.4166666667 |
| 1            |
| 1            |
| 1            |
| 0.25         |
| 1            |
| 1            |
| 1            |
| 0.5          |
| 1            |
| 0.25         |
| 1            |
| 1            |
| 1            |

|              |
|--------------|
| 1            |
| 0.209972112  |
| 0.6773654476 |
| 0.5588235294 |
| 1            |
| 0.0637254902 |
| 1            |
| 0.5588235294 |
| 0.1379790553 |
| 1            |
| 1            |
| 0.5588235294 |
| 0.6256684492 |
| 1            |
| 0.4166666667 |
| 0.6256684492 |
| 0.5588235294 |
| 1            |
| 0.6256684492 |
| 0.376114082  |
| 0.376114082  |
| 0.4166666667 |
| 1            |
| 1            |
| 0.4166666667 |
| 1            |
| 1            |
| 0.4166666667 |
| 0.4166666667 |
| 1            |
| 0.4166666667 |
| 1            |
| 0.5588235294 |
| 1            |
| 1            |
| 1            |
| 1            |
| 1            |
| 0.6256684492 |
| 0.1666666667 |
| 0.2869875223 |
| 1            |
| 0.5          |
| 0.5          |
| 1            |
| 1            |
| 1            |
| 0.6256684492 |
| 1            |
| 1            |
| 1            |

|              |
|--------------|
| 0.061942959  |
| 0.061942959  |
| 1            |
| 0.6256684492 |
| 0.1379790553 |
| 0.4166666667 |
| 1            |
| 0.4166666667 |
| 1            |
| 0.5          |
| 1            |
| 1            |
| 0.5588235294 |
| 1            |
| 0.4166666667 |
| 0.25         |
| 1            |
| 0.5          |
| 0.6773654476 |
| 1            |
| 1            |
| 1            |
| 1            |
| 1            |
| 1            |
| 1            |
| 1            |
| 1            |
| 1            |
| 0.6256684492 |
| 0.4166666667 |
| 1            |
| 0.4166666667 |
| 0.6256684492 |
| 1            |
| 0.6256684492 |
| 0.376114082  |
| 1            |
| 1            |
| 1            |
| 1            |
| 1            |
| 0.4166666667 |
| 0.1666666667 |
| 0.5          |
| 0.5          |
| 1            |
| 1            |
| 1            |
| 1            |
| 1            |

|              |
|--------------|
| 0.166666667  |
| 0.5          |
| 0.5          |
| 1            |
| 1            |
| 1            |
| 1            |
| 1            |
| 0.166666667  |
| 1            |
| 1            |
| 0.416666667  |
| 1            |
| 1            |
| 1            |
| 0.5588235294 |
| 1            |
| 1            |
| 0.25         |
| 1            |
| 0.3666803232 |
| 0.6256684492 |
| 1            |
| 1            |
| 1            |
| 0.5588235294 |
| 0.5588235294 |
| 0.5588235294 |
| 0.416666667  |
| 0.5588235294 |
| 0.416666667  |
| 1            |
| 0.2869875223 |
| 0.5          |
| 1            |
| 0.5          |
| 0.5          |
| 1            |
| 0.416666667  |
| 1            |
| 0.5588235294 |
| 0.416666667  |
| 1            |
| 1            |
| 1            |
| 1            |
| 0.376114082  |
| 0.5588235294 |
| 0.5588235294 |
| 1            |
| 1            |

|              |
|--------------|
| 0.25         |
| 0.416666667  |
| 1            |
| 0.416666667  |
| 0.416666667  |
| 1            |
| 1            |
| 1            |
| 1            |
| 0.5          |
| 1            |
| 0.416666667  |
| 0.166666667  |
| 1            |
| 0.5588235294 |
| 1            |
| 1            |
| 0.416666667  |
| 0.6295677362 |
| 0.166666667  |
| 1            |
| 0.6773654476 |
| 1            |
| 1            |
| 0.25         |
| 1            |
| 0.416666667  |
| 1            |
| 1            |
| 1            |
| 0.166666667  |
| 0.25         |
| 1            |
| 1            |
| 1            |
| 0.5          |
| 1            |
| 0.6773654476 |
| 1            |
| 0.416666667  |
| 0.166666667  |
| 0.166666667  |
| 0.166666667  |
| 0.416666667  |
| 1            |
| 0.3666803232 |
| 0.3666803232 |
| 1            |
| 0.166666667  |
| 0.5          |
| 0.166666667  |

|              |
|--------------|
| 0.25         |
| 1            |
| 1            |
| 1            |
| 0.5588235294 |
| 1            |
| 1            |
| 1            |
| 1            |
| 0.4166666667 |
| 1            |
| 0.4166666667 |
| 1            |
| 0.4166666667 |
| 1            |
| 1            |
| 0.5          |
| 1            |
| 0.4166666667 |
| 1            |
| 0.4166666667 |
| 0.5          |
| 0.5588235294 |
| 0.4166666667 |
| 0.376114082  |
| 0.4166666667 |
| 1            |
| 1            |
| 0.376114082  |
| 1            |
| 0.5588235294 |
| 1            |
| 1            |
| 1            |
| 1            |
| 1            |
| 1            |
| 1            |
| 0.25         |
| 1            |
| 0.25         |
| 0.25         |
| 0.4166666667 |
| 0.376114082  |
| 0.6256684492 |
| 1            |
| 1            |
| 0.1666666667 |
| 0.1666666667 |
| 1            |
| 1            |







|              |
|--------------|
| 1            |
| 0.6256684492 |
| 0.6256684492 |
| 1            |
| 0.25         |
| 1            |
| 1            |
| 0.1666666667 |
| 1            |
| 0.4166666667 |
| 1            |
| 0.5588235294 |
| 0.376114082  |
| 0.4166666667 |
| 1            |
| 0.6256684492 |
| 0.6256684492 |
| 0.25         |
| 0.5588235294 |
| 1            |
| 1            |
| 1            |
| 1            |
| 0.25         |
| 1            |
| 1            |
| 0.6295677362 |
| 0.5          |
| 1            |
| 0.5588235294 |
| 1            |
| 1            |
| 1            |
| 1            |
| 1            |
| 0.1666666667 |
| 0.1666666667 |
| 0.5588235294 |
| 0.5588235294 |
| 0.5588235294 |
| 1            |
| 1            |
| 1            |
| 1            |
| 0.061942959  |
| 1            |
| 1            |
| 1            |
| 1            |
| 1            |

|              |
|--------------|
| 1            |
| 1            |
| 1            |
| 1            |
| 1            |
| 1            |
| 0.5588235294 |
| 0.1379790553 |
| 1            |
| 1            |
| 0.4166666667 |
| 1            |
| 0.4166666667 |
| 1            |
| 1            |
| 0.4166666667 |
| 1            |
| 1            |
| 1            |
| 1            |
| 1            |
| 1            |
| 0.5          |
| 1            |
| 0.5          |
| 1            |
| 0.6256684492 |
| 0.4166666667 |
| 1            |
| 0.6256684492 |
| 0.5          |
| 0.5588235294 |
| 0.4166666667 |
| 1            |
| 1            |
| 0.4166666667 |
| 0.4166666667 |
| 0.2869875223 |
| 1            |
| 1            |
| 1            |
| 1            |
| 1            |
| 1            |
| 1            |
| 1            |
| 1            |
| 1            |
| 0.25         |
| 0.6295677362 |
| 1            |
| 1            |

|              |
|--------------|
| 0.3666803232 |
| 1            |
| 1            |
| 0.6256684492 |
| 1            |
| 1            |
| 1            |
| 1            |
| 0.5          |
| 1            |
| 1            |
| 1            |
| 0.4166666667 |
| 1            |
| 1            |
| 1            |
| 1            |
| 0.1666666667 |
| 0.1666666667 |
| 1            |
| 1            |
| 0.4166666667 |
| 0.5588235294 |
| 1            |
| 1            |
| 0.6256684492 |
| 1            |
| 0.4166666667 |
| 1            |
| 0.5588235294 |
| 0.4166666667 |
| 0.4166666667 |
| 0.6256684492 |
| 0.4166666667 |
| 1            |
| 1            |
| 1            |
| 1            |
| 0.25         |
| 1            |
| 0.6256684492 |
| 1            |
| 0.4166666667 |
| 1            |
| 1            |
| 1            |
| 1            |
| 1            |
| 1            |
| 0.5588235294 |
| 1            |
| 1            |

|              |
|--------------|
| 1            |
| 0.6256684492 |
| 0.6256684492 |
| 1            |
| 0.1666666667 |
| 0.6773654476 |
| 0.4178238744 |
| 1            |
| 1            |
| 1            |
| 1            |
| 1            |
| 1            |
| 1            |
| 1            |
| 1            |
| 0.1666666667 |
| 0.5588235294 |
| 1            |
| 1            |
| 1            |
| 0.0637254902 |
| 0.4166666667 |
| 1            |
| 1            |
| 1            |
| 1            |
| 0.25         |
| 0.25         |
| 0.4178238744 |
| 1            |
| 1            |
| 0.1247771836 |
| 0.6256684492 |
| 0.6295677362 |
| 1            |
| 1            |
| 0.4166666667 |
| 0.25         |
| 1            |
| 1            |
| 0.25         |
| 1            |
| 1            |
| 0.2869875223 |
| 1            |
| 0.25         |
| 1            |
| 1            |
| 1            |
| 1            |

|              |
|--------------|
| 0.416666667  |
| 1            |
| 1            |
| 0.416666667  |
| 1            |
| 1            |
| 0.4178238744 |
| 0.4178238744 |
| 1            |
| 1            |
| 0.2869875223 |
| 0.6256684492 |
| 0.416666667  |
| 0.416666667  |
| 1            |
| 0.6256684492 |
| 0.6256684492 |
| 0.209972112  |
| 1            |
| 1            |
| 0.6256684492 |
| 0.6256684492 |
| 1            |
| 0.25         |
| 1            |
| 0.376114082  |
| 1            |
| 1            |
| 1            |
| 1            |
| 0.416666667  |
| 1            |
| 0.061942959  |
| 0.5588235294 |
| 0.376114082  |
| 1            |
| 0.416666667  |
| 1            |
| 0.5          |
| 0.416666667  |
| 0.416666667  |
| 0.6256684492 |
| 1            |
| 1            |
| 1            |
| 0.416666667  |
| 0.416666667  |
| 0.416666667  |
| 0.2869875223 |
| 1            |
| 1            |

|              |
|--------------|
| 0.6256684492 |
| 0.6256684492 |
| 1            |
| 1            |
| 0.6256684492 |
| 1            |
| 0.6773654476 |
| 1            |
| 1            |
| 1            |
| 1            |
| 1            |
| 1            |
| 1            |
| 1            |
| 1            |
| 0.5588235294 |
| 0.6256684492 |
| 1            |
| 0.5588235294 |
| 0.1666666667 |
| 0.2869875223 |
| 1            |
| 0.1666666667 |
| 1            |
| 1            |
| 1            |
| 1            |
| 1            |
| 1            |
| 0.4166666667 |
| 1            |
| 0.2869875223 |
| 0.5588235294 |
| 1            |
| 1            |
| 0.209972112  |
| 1            |
| 0.25         |
| 0.25         |
| 0.5          |
| 1            |
| 0.5          |
| 0.5          |
| 0.6256684492 |
| 0.5          |
| 1            |
| 1            |
| 1            |
| 0.5588235294 |
| 0.5588235294 |

|              |
|--------------|
| 0.5588235294 |
| 0.5588235294 |
| 1            |
| 0.5          |
| 0.5          |
| 1            |
| 1            |
| 1            |
| 1            |
| 1            |
| 1            |
| 1            |
| 1            |
| 1            |
| 0.376114082  |
| 1            |
| 1            |
| 1            |
| 1            |
| 1            |
| 1            |
| 1            |
| 1            |
| 1            |
| 0.416666667  |
| 1            |
| 0.416666667  |
| 1            |
| 0.25         |
| 0.5588235294 |
| 0.5588235294 |
| 1            |
| 0.416666667  |
| 0.416666667  |
| 0.416666667  |
| 0.416666667  |
| 0.416666667  |
| 0.416666667  |
| 0.416666667  |
| 0.25         |
| 1            |
| 1            |
| 1            |
| 1            |
| 0.25         |
| 0.416666667  |
| 0.3666803232 |
| 1            |
| 1            |
| 1            |
| 0.416666667  |
| 0.1379790553 |

|              |
|--------------|
| 0.5          |
| 1            |
| 0.3666803232 |
| 1            |
| 0.6256684492 |
| 0.0272914151 |
| 0.6256684492 |
| 1            |
| 0.376114082  |
| 0.25         |
| 1            |
| 1            |
| 1            |
| 0.061942959  |
| 0.3666803232 |
| 0.3666803232 |
| 0.061942959  |
| 0.6256684492 |
| 0.25         |
| 1            |
| 1            |
| 0.416666667  |
| 1            |
| 1            |
| 0.5588235294 |
| 1            |
| 1            |
| 0.5588235294 |
| 1            |
| 0.416666667  |
| 1            |
| 1            |
| 0.6256684492 |
| 0.5588235294 |
| 0.5588235294 |
| 0.5588235294 |
| 0.6256684492 |
| 1            |
| 1            |
| 1            |
| 1            |
| 0.166666667  |
| 1            |
| 1            |
| 0.416666667  |
| 1            |
| 0.416666667  |
| 1            |
| 1            |
| 1            |
| 1            |



|              |
|--------------|
| 1            |
| 1            |
| 1            |
| 1            |
| 0.5          |
| 1            |
| 1            |
| 1            |
| 0.6256684492 |
| 1            |
| 0.5          |
| 1            |
| 1            |
| 1            |
| 0.6256684492 |
| 1            |
| 1            |
| 0.5588235294 |
| 0.209972112  |
| 1            |
| 1            |
| 1            |
| 1            |
| 0.4166666667 |
| 1            |
| 0.1666666667 |
| 1            |
| 0.5          |
| 0.4166666667 |
| 0.5          |
| 1            |
| 0.5          |
| 1            |
| 0.25         |
| 0.5          |
| 1            |
| 1            |
| 1            |
| 0.5          |
| 0.1666666667 |
| 0.5          |
| 1            |
| 1            |
| 1            |
| 1            |
| 1            |
| 1            |
| 0.5          |
| 1            |
| 1            |
| 0.2869875223 |

|              |
|--------------|
| 0.6256684492 |
| 1            |
| 1            |
| 1            |
| 1            |
| 1            |
| 1            |
| 1            |
| 1            |
| 1            |
| 1            |
| 1            |
| 1            |
| 1            |
| 1            |
| 0.4166666667 |
| 0.2869875223 |
| 0.4166666667 |
| 0.5588235294 |
| 0.5588235294 |
| 0.4166666667 |
| 0.5588235294 |
| 0.25         |
| 0.4166666667 |
| 1            |
| 1            |
| 1            |
| 1            |
| 0.1666666667 |
| 1            |
| 0.5588235294 |
| 0.5588235294 |
| 0.4166666667 |
| 0.1666666667 |
| 1            |
| 0.1379790553 |
| 0.5588235294 |
| 0.5588235294 |
| 0.5588235294 |
| 0.5588235294 |
| 0.6256684492 |
| 0.6256684492 |
| 1            |
| 0.6256684492 |
| 0.6256684492 |
| 0.25         |
| 1            |
| 0.5588235294 |
| 0.25         |
| 1            |
| 0.376114082  |

|              |
|--------------|
| 1            |
| 0.6256684492 |
| 0.5588235294 |
| 0.1666666667 |
| 1            |
| 0.5588235294 |
| 1            |
| 1            |
| 0.376114082  |
| 1            |
| 0.5588235294 |
| 0.25         |
| 0.25         |
| 1            |
| 1            |
| 0.25         |
| 0.25         |
| 0.25         |
| 0.5588235294 |
| 0.25         |
| 0.376114082  |
| 1            |
| 1            |
| 0.25         |
| 0.376114082  |
| 0.376114082  |
| 1            |
| 0.1247771836 |
| 0.25         |
| 1            |
| 1            |
| 1            |
| 1            |
| 0.376114082  |
| 1            |
| 1            |
| 1            |
| 0.376114082  |
| 0.6773654476 |
| 1            |
| 1            |
| 0.4178238744 |
| 0.376114082  |
| 0.4178238744 |
| 0.376114082  |
| 0.5588235294 |
| 0.5588235294 |
| 0.5588235294 |
| 0.5588235294 |
| 1            |
| 1            |

|              |
|--------------|
| 0.5588235294 |
| 0.1666666667 |
| 0.5588235294 |
| 0.5588235294 |
| 0.2869875223 |
| 1            |
| 0.5588235294 |
| 0.1666666667 |
| 0.5588235294 |
| 1            |
| 1            |
| 1            |
| 0.1247771836 |
| 0.1247771836 |
| 1            |
| 0.4166666667 |
| 0.4166666667 |
| 0.4166666667 |
| 0.4166666667 |
| 0.4166666667 |
| 0.4166666667 |
| 0.4166666667 |
| 0.4166666667 |
| 0.4166666667 |
| 0.4166666667 |
| 0.4166666667 |
| 0.4166666667 |
| 0.4166666667 |
| 0.4166666667 |
| 1            |
| 1            |
| 0.4166666667 |
| 0.4166666667 |
| 0.4166666667 |
| 0.4166666667 |
| 0.4166666667 |
| 0.4166666667 |
| 0.4166666667 |
| 0.1666666667 |
| 0.6256684492 |
| 0.5588235294 |
| 1            |
| 1            |
| 0.5          |
| 1            |
| 1            |
| 0.376114082  |
| 1            |
| 0.6256684492 |
| 1            |
| 1            |
| 1            |



|              |
|--------------|
| 1            |
| 1            |
| 1            |
| 1            |
| 1            |
| 0.4166666667 |
| 1            |
| 1            |
| 0.1379790553 |
| 0.2869875223 |
| 0.1379790553 |
| 1            |
| 0.2869875223 |
| 0.1379790553 |
| 1            |
| 0.1379790553 |
| 1            |
| 0.1379790553 |
| 0.1379790553 |
| 1            |
| 1            |
| 1            |
| 0.6256684492 |
| 0.2869875223 |
| 0.209972112  |
| 0.6773654476 |
| 0.6773654476 |
| 1            |
| 1            |
| 0.6773654476 |
| 0.6773654476 |
| 1            |
| 1            |
| 1            |
| 1            |
| 1            |
| 1            |
| 0.2869875223 |
| 1            |
| 1            |
| 1            |
| 1            |
| 1            |
| 1            |
| 1            |
| 1            |
| 1            |
| 0.4166666667 |
| 0.4166666667 |
| 0.6256684492 |
| 1            |
| 1            |

|              |
|--------------|
| 0.416666667  |
| 1            |
| 0.6256684492 |
| 0.416666667  |
| 1            |
| 0.416666667  |
| 1            |
| 0.416666667  |
| 1            |
| 0.416666667  |
| 1            |
| 0.416666667  |
| 1            |
| 1            |
| 1            |
| 0.416666667  |
| 1            |
| 1            |
| 1            |
| 1            |
| 1            |
| 0.376114082  |
| 1            |
| 1            |
| 1            |
| 0.25         |
| 1            |
| 0.416666667  |
| 1            |
| 0.6773654476 |
| 1            |
| 1            |
| 0.416666667  |
| 0.2869875223 |
| 0.5588235294 |
| 1            |
| 0.4178238744 |
| 0.166666667  |
| 1            |
| 0.5588235294 |
| 1            |
| 1            |
| 1            |
| 1            |
| 1            |
| 0.5          |
| 0.2869875223 |
| 0.2869875223 |
| 0.2869875223 |
| 0.2869875223 |

|              |
|--------------|
| 0.2869875223 |
| 0.2869875223 |
| 1            |
| 0.25         |
| 0.5          |
| 0.5          |
| 0.1379790553 |
| 0.1666666667 |
| 0.25         |
| 0.2869875223 |
| 0.5          |
| 1            |
| 1            |
| 0.2869875223 |
| 0.5          |
| 1            |
| 1            |
| 0.4166666667 |
| 1            |
| 0.1666666667 |
| 1            |
| 1            |
| 1            |
| 1            |
| 1            |
| 1            |
| 1            |
| 1            |
| 0.061942959  |
| 0.25         |
| 1            |
| 1            |
| 0.25         |
| 0.25         |
| 1            |
| 1            |
| 1            |
| 0.1666666667 |
| 1            |
| 1            |
| 1            |
| 0.25         |
| 0.5588235294 |
| 0.4166666667 |
| 1            |
| 0.6256684492 |
| 0.6256684492 |
| 0.6256684492 |
| 0.4166666667 |
| 1            |
| 0.0637254902 |



|              |
|--------------|
| 0.0637254902 |
| 1            |
| 0.0637254902 |
| 0.1666666667 |
| 1            |
| 1            |
| 1            |
| 1            |
| 0.1247771836 |
| 0.5          |
| 1            |
| 0.25         |
| 0.2869875223 |
| 0.4166666667 |
| 0.376114082  |
| 0.5588235294 |
| 0.6256684492 |
| 1            |
| 0.1666666667 |
| 0.5588235294 |
| 0.4166666667 |
| 0.5          |
| 1            |
| 0.5          |
| 1            |
| 0.25         |
| 0.6256684492 |
| 0.4166666667 |
| 0.4166666667 |
| 0.1666666667 |
| 1            |
| 0.5          |
| 1            |
| 1            |
| 1            |
| 0.4166666667 |
| 0.4166666667 |
| 0.4166666667 |
| 1            |
| 1            |
| 0.4166666667 |
| 0.4166666667 |
| 0.1379790553 |
| 0.6256684492 |
| 1            |
| 0.6256684492 |
| 0.25         |
| 1            |
| 1            |
| 1            |
| 0.6256684492 |

|              |
|--------------|
| 1            |
| 1            |
| 0.209972112  |
| 0.5588235294 |
| 0.5588235294 |
| 0.1666666667 |
| 0.6295677362 |
| 1            |
| 1            |
| 1            |
| 1            |
| 1            |
| 0.6256684492 |
| 1            |
| 0.5          |
| 1            |
| 0.4166666667 |
| 0.6256684492 |
| 0.4166666667 |
| 0.4166666667 |
| 1            |
| 1            |
| 1            |
| 1            |
| 1            |
| 1            |
| 1            |
| 1            |
| 1            |
| 1            |
| 0.061942959  |
| 1            |
| 1            |
| 1            |
| 0.5          |
| 1            |
| 1            |
| 1            |
| 0.5588235294 |
| 0.209972112  |
| 0.4166666667 |
| 1            |
| 0.5588235294 |
| 1            |
| 0.4166666667 |
| 0.4166666667 |
| 0.6256684492 |
| 0.4166666667 |
| 1            |
| 0.5588235294 |
| 0.25         |
| 1            |

|              |
|--------------|
| 1            |
| 0.6295677362 |
| 1            |
| 0.5588235294 |
| 0.6773654476 |
| 1            |
| 0.5588235294 |
| 0.4166666667 |
| 0.4166666667 |
| 0.4166666667 |
| 0.5588235294 |
| 0.6256684492 |
| 0.6256684492 |
| 1            |
| 0.5588235294 |
| 0.5588235294 |
| 1            |
| 1            |
| 0.4166666667 |
| 1            |
| 1            |
| 1            |
| 1            |
| 0.1247771836 |
| 0.6256684492 |
| 1            |
| 1            |
| 1            |
| 1            |
| 0.6295677362 |
| 0.2869875223 |
| 0.2869875223 |
| 0.2869875223 |
| 0.4166666667 |
| 0.2869875223 |
| 0.2869875223 |
| 1            |
| 0.4166666667 |
| 0.209972112  |
| 0.209972112  |
| 0.209972112  |
| 0.25         |
| 1            |
| 0.1379790553 |
| 0.5          |
| 1            |
| 1            |
| 0.5588235294 |
| 0.5588235294 |
| 1            |
| 0.5588235294 |

|              |
|--------------|
| 1            |
| 1            |
| 1            |
| 1            |
| 0.25         |
| 0.376114082  |
| 1            |
| 1            |
| 1            |
| 0.5          |
| 1            |
| 0.25         |
| 1            |
| 1            |
| 1            |
| 0.416666667  |
| 1            |
| 1            |
| 1            |
| 0.416666667  |
| 1            |
| 0.5588235294 |
| 1            |
| 1            |
| 0.2869875223 |
| 0.416666667  |
| 1            |
| 1            |
| 1            |
| 0.166666667  |
| 1            |
| 1            |
| 0.416666667  |
| 1            |
| 0.416666667  |
| 0.166666667  |
| 0.416666667  |
| 1            |
| 0.5588235294 |
| 1            |
| 1            |
| 1            |
| 0.5588235294 |
| 0.416666667  |
| 0.416666667  |
| 0.416666667  |
| 1            |
| 1            |
| 0.209972112  |
| 1            |
| 0.5588235294 |

|              |
|--------------|
| 1            |
| 1            |
| 1            |
| 0.2869875223 |
| 1            |
| 1            |
| 1            |
| 0.061942959  |
| 0.4166666667 |
| 1            |
| 0.5          |
| 1            |
| 1            |
| 1            |
| 0.25         |
| 0.5          |
| 0.6256684492 |
| 0.6256684492 |
| 1            |
| 0.6256684492 |
| 0.6256684492 |
| 1            |
| 1            |
| 0.25         |
| 1            |
| 1            |
| 1            |
| 1            |
| 1            |
| 1            |
| 0.5588235294 |
| 0.5588235294 |
| 0.4166666667 |
| 0.5588235294 |
| 1            |
| 1            |
| 1            |
| 0.5          |
| 1            |
| 1            |
| 0.376114082  |
| 1            |
| 1            |
| 0.5          |
| 1            |
| 1            |
| 0.5          |
| 1            |
| 1            |
| 1            |
| 1            |
| 1            |
| 1            |

|              |
|--------------|
| 0.416666667  |
| 0.5588235294 |
| 0.166666667  |
| 1            |
| 1            |
| 1            |
| 0.209972112  |
| 0.5          |
| 1            |
| 1            |
| 0.416666667  |
| 0.416666667  |
| 0.5588235294 |
| 0.1379790553 |
| 1            |
| 1            |
| 1            |
| 1            |
| 1            |
| 1            |
| 1            |
| 0.166666667  |
| 0.416666667  |
| 1            |
| 1            |
| 1            |
| 1            |
| 1            |
| 1            |
| 1            |
| 1            |
| 1            |
| 1            |
| 0.5          |
| 0.5          |
| 0.5          |
| 0.5          |
| 1            |
| 0.5          |
| 1            |
| 1            |
| 0.416666667  |
| 1            |
| 1            |
| 0.5          |
| 1            |
| 0.6256684492 |
| 1            |
| 1            |
| 1            |
| 0.5          |

|              |
|--------------|
| 1            |
| 1            |
| 0.5          |
| 1            |
| 1            |
| 0.5          |
| 1            |
| 1            |
| 0.1379790553 |
| 1            |
| 1            |
| 0.6295677362 |
| 0.1379790553 |
| 0.6773654476 |
| 0.4166666667 |
| 1            |
| 1            |
| 1            |
| 0.5588235294 |
| 0.5588235294 |
| 1            |
| 0.2869875223 |
| 1            |
| 0.209972112  |
| 0.4166666667 |
| 1            |
| 1            |
| 1            |
| 1            |
| 0.25         |
| 1            |
| 0.6256684492 |
| 0.1666666667 |
| 1            |
| 1            |
| 1            |
| 1            |
| 0.6295677362 |
| 0.4166666667 |
| 0.6256684492 |
| 1            |
| 1            |
| 1            |
| 1            |
| 0.5          |
| 1            |
| 0.25         |
| 0.4166666667 |
| 0.25         |
| 1            |
| 1            |





|              |
|--------------|
| 0.5          |
| 0.416666667  |
| 0.6256684492 |
| 0.25         |
| 0.5588235294 |
| 1            |
| 1            |
| 1            |
| 0.5588235294 |
| 0.6773654476 |
| 0.25         |
| 1            |
| 0.25         |
| 0.5588235294 |
| 1            |
| 0.25         |
| 1            |
| 0.6256684492 |
| 1            |
| 0.416666667  |
| 0.5588235294 |
| 1            |
| 0.6256684492 |
| 1            |
| 1            |
| 1            |
| 1            |
| 1            |
| 1            |
| 0.25         |
| 1            |
| 0.416666667  |
| 0.416666667  |
| 0.416666667  |
| 0.5588235294 |
| 0.376114082  |
| 1            |
| 0.5588235294 |
| 1            |
| 1            |
| 1            |
| 0.209972112  |
| 1            |
| 1            |
| 1            |
| 0.5          |
| 0.376114082  |
| 1            |
| 1            |
| 0.25         |
| 1            |

|              |
|--------------|
| 1            |
| 1            |
| 1            |
| 1            |
| 0.5588235294 |
| 0.25         |
| 0.1666666667 |
| 0.4166666667 |
| 1            |
| 1            |
| 0.2869875223 |
| 0.376114082  |
| 1            |
| 1            |
| 1            |
| 0.5          |
| 1            |
| 0.25         |
| 0.5588235294 |
| 0.5588235294 |
| 0.1666666667 |
| 0.2869875223 |
| 1            |
| 1            |
| 0.6256684492 |
| 1            |
| 1            |
| 0.5588235294 |
| 1            |
| 0.5          |
| 1            |
| 1            |
| 0.5588235294 |
| 1            |
| 0.5          |
| 0.5          |
| 0.6773654476 |
| 0.25         |
| 0.5          |
| 0.4166666667 |
| 0.6773654476 |
| 0.6256684492 |
| 1            |
| 1            |
| 1            |
| 1            |
| 1            |
| 0.25         |
| 1            |
| 1            |
| 0.5          |

|              |
|--------------|
| 1            |
| 1            |
| 1            |
| 1            |
| 0.5588235294 |
| 0.5          |
| 0.1666666667 |
| 0.1666666667 |
| 0.5          |
| 0.1379790553 |
| 1            |
| 0.4166666667 |
| 1            |
| 0.25         |
| 1            |
| 1            |
| 0.4166666667 |
| 0.5588235294 |
| 1            |
| 0.6256684492 |
| 1            |
| 1            |
| 0.4166666667 |
| 1            |
| 1            |
| 0.25         |
| 0.5588235294 |
| 1            |
| 1            |
| 1            |
| 1            |
| 1            |
| 0.4166666667 |
| 1            |
| 1            |
| 1            |
| 0.4166666667 |
| 1            |
| 1            |
| 1            |
| 1            |
| 1            |
| 1            |
| 1            |
| 1            |
| 0.1666666667 |
| 1            |
| 1            |
| 1            |
| 1            |
| 1            |
| 1            |

|              |
|--------------|
| 1            |
| 1            |
| 1            |
| 1            |
| 1            |
| 0.416666667  |
| 0.376114082  |
| 0.1247771836 |
| 0.6256684492 |
| 0.5          |
| 1            |
| 1            |
| 1            |
| 1            |
| 1            |
| 1            |
| 1            |
| 1            |
| 1            |
| 1            |
| 1            |
| 1            |
| 1            |
| 1            |
| 1            |
| 0.6295677362 |
| 0.6295677362 |
| 0.6295677362 |
| 0.416666667  |
| 1            |
| 0.416666667  |
| 0.416666667  |
| 1            |
| 1            |
| 1            |
| 1            |
| 1            |
| 0.5588235294 |
| 0.5588235294 |
| 0.5588235294 |
| 0.5588235294 |
| 0.416666667  |
| 1            |
| 1            |
| 1            |
| 1            |
| 0.25         |
| 1            |
| 1            |
| 1            |
| 1            |
| 0.166666667  |

|              |
|--------------|
| 1            |
| 0.5          |
| 1            |
| 0.416666667  |
| 0.5588235294 |
| 1            |
| 0.376114082  |
| 0.5          |
| 0.6256684492 |
| 1            |
| 0.416666667  |
| 0.25         |
| 1            |
| 1            |
| 0.25         |
| 0.166666667  |
| 0.5          |
| 1            |
| 0.5588235294 |
| 0.5588235294 |
| 0.6256684492 |
| 0.416666667  |
| 1            |
| 0.416666667  |
| 1            |
| 1            |
| 1            |
| 0.376114082  |
| 1            |
| 0.6256684492 |
| 0.416666667  |
| 0.6256684492 |
| 1            |
| 1            |
| 1            |
| 1            |
| 0.25         |
| 1            |
| 0.416666667  |
| 1            |
| 1            |
| 0.6256684492 |
| 0.416666667  |
| 0.6256684492 |
| 0.416666667  |
| 1            |
| 0.416666667  |
| 1            |
| 1            |
| 0.5588235294 |
| 1            |

|              |
|--------------|
| 1            |
| 1            |
| 1            |
| 0.6256684492 |
| 0.1666666667 |
| 0.4166666667 |
| 1            |
| 0.25         |
| 1            |
| 1            |
| 0.376114082  |
| 1            |
| 1            |
| 0.6256684492 |
| 1            |
| 1            |
| 1            |
| 1            |
| 1            |
| 1            |
| 1            |
| 0.6256684492 |
| 0.6256684492 |
| 1            |
| 0.4166666667 |
| 0.5          |
| 1            |
| 0.4166666667 |
| 1            |
| 1            |
| 0.25         |
| 1            |
| 1            |
| 1            |
| 0.4166666667 |
| 0.5588235294 |
| 1            |
| 1            |
| 0.5588235294 |
| 0.6256684492 |
| 1            |
| 1            |
| 0.061942959  |
| 1            |
| 1            |
| 1            |
| 1            |
| 0.6256684492 |
| 0.6256684492 |
| 0.376114082  |
| 0.4166666667 |

|              |
|--------------|
| 1            |
| 0.376114082  |
| 0.4166666667 |
| 0.1666666667 |
| 0.5          |
| 0.4166666667 |
| 0.5          |
| 1            |
| 1            |
| 0.4166666667 |
| 0.4166666667 |
| 1            |
| 1            |
| 0.25         |
| 0.25         |
| 0.25         |
| 0.25         |
| 0.25         |
| 0.25         |
| 0.4166666667 |
| 0.6773654476 |
| 0.5          |
| 0.4166666667 |
| 0.4166666667 |
| 1            |
| 1            |
| 1            |
| 1            |
| 1            |
| 1            |
| 1            |
| 1            |
| 1            |
| 1            |
| 1            |
| 1            |
| 0.376114082  |
| 1            |
| 1            |
| 0.6773654476 |
| 1            |
| 0.5          |
| 0.1666666667 |
| 0.2869875223 |
| 1            |
| 0.5588235294 |
| 1            |
| 1            |
| 1            |
| 0.4166666667 |
| 1            |
| 1            |
| 1            |

|              |
|--------------|
| 0.6256684492 |
| 1            |
| 0.4166666667 |
| 0.5588235294 |
| 0.4166666667 |
| 0.6773654476 |
| 0.6773654476 |
| 1            |
| 1            |
| 0.5588235294 |
| 0.4240540589 |
| 1            |
| 1            |
| 0.376114082  |
| 0.25         |
| 1            |
| 1            |
| 1            |
| 0.3666803232 |
| 1            |
| 0.25         |
| 0.1666666667 |
| 0.1666666667 |
| 0.1666666667 |
| 1            |
| 1            |
| 1            |
| 0.25         |
| 0.5          |
| 1            |
| 0.6256684492 |
| 1            |
| 0.4166666667 |
| 1            |
| 1            |
| 1            |
| 1            |
| 0.5588235294 |
| 0.1666666667 |
| 0.2869875223 |
| 1            |
| 1            |
| 1            |
| 0.4166666667 |
| 1            |
| 1            |
| 0.2869875223 |
| 0.6256684492 |
| 1            |
| 0.25         |
| 0.25         |



|              |
|--------------|
| 0.25         |
| 0.416666667  |
| 0.166666667  |
| 1            |
| 0.5588235294 |
| 1            |
| 0.4178238744 |
| 1            |
| 0.6295677362 |
| 0.376114082  |
| 0.416666667  |
| 1            |
| 0.6295677362 |
| 1            |
| 0.416666667  |
| 0.166666667  |
| 0.416666667  |
| 0.416666667  |
| 1            |
| 0.2869875223 |
| 1            |
| 0.3666803232 |
| 0.6256684492 |
| 0.25         |
| 1            |
| 1            |
| 1            |
| 1            |
| 1            |
| 1            |
| 1            |
| 1            |
| 0.1379790553 |
| 0.6256684492 |
| 0.376114082  |
| 0.25         |
| 0.166666667  |
| 1            |
| 1            |
| 0.1379790553 |
| 1            |
| 0.376114082  |
| 1            |
| 1            |
| 1            |
| 1            |
| 1            |
| 0.5          |
| 0.5          |
| 1            |
| 1            |
| 1            |

|              |
|--------------|
| 1            |
| 0.166666667  |
| 1            |
| 1            |
| 1            |
| 0.416666667  |
| 1            |
| 0.5          |
| 1            |
| 0.166666667  |
| 1            |
| 1            |
| 0.416666667  |
| 1            |
| 0.416666667  |
| 1            |
| 1            |
| 1            |
| 1            |
| 1            |
| 1            |
| 0.416666667  |
| 0.416666667  |
| 0.5          |
| 1            |
| 1            |
| 1            |
| 1            |
| 1            |
| 1            |
| 1            |
| 1            |
| 1            |
| 0.6256684492 |
| 0.416666667  |
| 0.5588235294 |
| 0.209972112  |
| 0.5588235294 |
| 0.5588235294 |
| 1            |
| 0.376114082  |
| 1            |
| 0.2869875223 |
| 1            |
| 1            |
| 1            |
| 0.6256684492 |
| 1            |
| 0.416666667  |
| 1            |
| 0.416666667  |

|              |
|--------------|
| 1            |
| 1            |
| 1            |
| 0.5588235294 |
| 0.4166666667 |
| 1            |
| 0.5588235294 |
| 1            |
| 0.4166666667 |
| 1            |
| 0.5588235294 |
| 0.5588235294 |
| 0.5588235294 |
| 1            |
| 1            |
| 0.6256684492 |
| 0.6256684492 |
| 1            |
| 0.5588235294 |
| 0.5588235294 |
| 0.5588235294 |
| 0.5588235294 |
| 0.5588235294 |
| 1            |
| 0.5          |
| 0.5588235294 |
| 0.5588235294 |
| 0.5588235294 |
| 0.5588235294 |
| 0.6256684492 |
| 0.6256684492 |
| 0.6256684492 |
| 1            |
| 0.5588235294 |
| 0.5588235294 |
| 0.5588235294 |
| 0.5588235294 |
| 0.4166666667 |
| 1            |
| 1            |
| 0.6256684492 |
| 0.5588235294 |
| 0.5588235294 |
| 0.2869875223 |
| 1            |
| 0.5588235294 |
| 0.5588235294 |
| 1            |
| 1            |
| 0.4166666667 |
| 0.4166666667 |

|              |
|--------------|
| 1            |
| 0.2869875223 |
| 1            |
| 1            |
| 1            |
| 1            |
| 1            |
| 0.4166666667 |
| 1            |
| 1            |
| 1            |
| 0.376114082  |
| 0.6256684492 |
| 1            |
| 1            |
| 1            |
| 1            |
| 0.1666666667 |
| 1            |
| 1            |
| 1            |
| 1            |
| 0.3666803232 |
| 1            |
| 0.4166666667 |
| 0.6256684492 |
| 0.6256684492 |
| 0.5588235294 |
| 1            |
| 1            |
| 0.25         |
| 1            |
| 0.5588235294 |
| 0.5588235294 |
| 0.1666666667 |
| 1            |
| 0.5          |
| 0.6773654476 |
| 0.4166666667 |
| 1            |
| 1            |
| 1            |
| 0.5          |
| 1            |
| 1            |
| 1            |
| 0.4166666667 |
| 1            |
| 1            |
| 1            |
| 1            |

|              |
|--------------|
| 1            |
| 0.416666667  |
| 0.5          |
| 0.5          |
| 0.5          |
| 1            |
| 1            |
| 1            |
| 1            |
| 1            |
| 1            |
| 1            |
| 1            |
| 1            |
| 0.5588235294 |
| 0.416666667  |
| 1            |
| 1            |
| 1            |
| 1            |
| 0.6256684492 |
| 0.6256684492 |
| 0.5588235294 |
| 1            |
| 1            |
| 1            |
| 0.25         |
| 0.6256684492 |
| 0.166666667  |
| 0.166666667  |
| 0.166666667  |
| 1            |
| 0.5          |
| 0.416666667  |
| 1            |
| 1            |
| 1            |
| 1            |
| 1            |
| 1            |
| 0.416666667  |
| 0.416666667  |
| 0.5          |
| 0.6256684492 |
| 0.6256684492 |
| 1            |
| 1            |
| 1            |
| 0.5588235294 |
| 0.416666667  |
| 0.6256684492 |
| 1            |

|              |
|--------------|
| 1            |
| 1            |
| 1            |
| 1            |
| 1            |
| 0.061942959  |
| 1            |
| 1            |
| 1            |
| 1            |
| 1            |
| 1            |
| 1            |
| 1            |
| 0.5588235294 |
| 0.6256684492 |
| 0.6256684492 |
| 1            |
| 0.4166666667 |
| 1            |
| 0.4166666667 |
| 0.2869875223 |
| 1            |
| 0.4166666667 |
| 0.5          |
| 0.5          |
| 1            |
| 0.6773654476 |
| 0.4166666667 |
| 1            |
| 1            |
| 0.25         |
| 0.6256684492 |
| 1            |
| 1            |
| 0.6256684492 |
| 0.5          |
| 1            |
| 1            |
| 0.5          |
| 0.6295677362 |
| 1            |
| 0.5588235294 |
| 1            |
| 0.5588235294 |
| 0.5588235294 |
| 0.5588235294 |
| 0.5          |
| 0.5588235294 |
| 0.5588235294 |
| 0.4178238744 |
| 1            |

|              |
|--------------|
| 0.5588235294 |
| 1            |
| 1            |
| 0.4166666667 |
| 1            |
| 1            |
| 0.2869875223 |
| 1            |
| 0.0637254902 |
| 0.4166666667 |
| 1            |
| 0.4166666667 |
| 1            |
| 1            |
| 0.0637254902 |
| 1            |
| 0.5588235294 |
| 0.5588235294 |
| 0.4166666667 |
| 1            |
| 1            |
| 1            |
| 1            |
| 0.5          |
| 1            |
| 1            |
| 1            |
| 0.4178238744 |
| 0.6295677362 |
| 0.4166666667 |
| 0.5          |
| 0.25         |
| 1            |
| 1            |
| 1            |
| 1            |
| 1            |
| 1            |
| 1            |
| 1            |
| 0.209972112  |
| 0.4166666667 |
| 1            |
| 1            |
| 1            |
| 1            |
| 0.376114082  |
| 0.25         |
| 0.25         |
| 0.6256684492 |
| 1            |
| 1            |

|              |
|--------------|
| 1            |
| 1            |
| 1            |
| 0.5588235294 |
| 0.4166666667 |
| 0.6773654476 |
| 1            |
| 0.5588235294 |
| 0.4166666667 |
| 0.4166666667 |
| 1            |
| 1            |
| 0.25         |
| 0.6256684492 |
| 0.4166666667 |
| 0.4166666667 |
| 1            |
| 0.1666666667 |
| 0.5          |
| 1            |
| 0.25         |
| 1            |
| 1            |
| 0.5588235294 |
| 1            |
| 1            |
| 1            |
| 1            |
| 0.4166666667 |
| 1            |
| 1            |
| 0.5588235294 |
| 1            |
| 1            |
| 1            |
| 1            |
| 1            |
| 0.25         |
| 1            |
| 0.6256684492 |
| 0.2869875223 |
| 0.6256684492 |
| 1            |
| 1            |
| 1            |
| 0.1666666667 |
| 0.1666666667 |
| 1            |
| 1            |
| 1            |
| 1            |



|              |
|--------------|
| 1            |
| 0.416666667  |
| 1            |
| 1            |
| 1            |
| 1            |
| 1            |
| 1            |
| 1            |
| 1            |
| 0.6773654476 |
| 1            |
| 1            |
| 0.416666667  |
| 0.166666667  |
| 1            |
| 1            |
| 1            |
| 1            |
| 1            |
| 0.416666667  |
| 1            |
| 1            |
| 1            |
| 0.5588235294 |
| 1            |
| 1            |
| 1            |
| 0.5          |
| 1            |
| 0.25         |
| 1            |
| 1            |
| 1            |
| 1            |
| 0.6256684492 |
| 1            |
| 0.5          |
| 1            |
| 0.5          |
| 0.416666667  |
| 1            |
| 1            |
| 1            |
| 0.416666667  |
| 0.416666667  |
| 0.2869875223 |
| 0.416666667  |
| 1            |
| 1            |
| 1            |

|              |
|--------------|
| 0.166666667  |
| 1            |
| 1            |
| 0.166666667  |
| 0.1379790553 |
| 0.376114082  |
| 0.3666803232 |
| 0.25         |
| 0.25         |
| 0.25         |
| 1            |
| 1            |
| 0.5588235294 |
| 1            |
| 1            |
| 0.209972112  |
| 1            |
| 0.25         |
| 1            |
| 0.6256684492 |
| 1            |
| 0.5588235294 |
| 0.1247771836 |
| 0.416666667  |
| 1            |
| 0.416666667  |
| 1            |
| 1            |
| 0.376114082  |
| 0.1379790553 |
| 0.5588235294 |
| 1            |
| 0.416666667  |
| 0.25         |
| 0.416666667  |
| 0.5          |
| 0.166666667  |
| 0.6295677362 |
| 0.6773654476 |
| 1            |
| 0.25         |
| 0.5588235294 |
| 0.416666667  |
| 0.416666667  |
| 1            |
| 1            |
| 0.416666667  |
| 1            |
| 1            |
| 1            |
| 1            |

|              |
|--------------|
| 1            |
| 0.1666666667 |
| 1            |
| 1            |
| 0.4166666667 |
| 0.376114082  |
| 1            |
| 0.376114082  |
| 0.1247771836 |
| 0.5588235294 |
| 0.4166666667 |
| 0.5588235294 |
| 0.5588235294 |
| 1            |
| 0.25         |
| 0.1379790553 |
| 0.1379790553 |
| 1            |
| 0.25         |
| 0.5          |
| 1            |
| 0.376114082  |
| 1            |
| 1            |
| 1            |
| 1            |
| 0.2869875223 |
| 0.2869875223 |
| 1            |
| 0.4166666667 |
| 1            |
| 1            |
| 1            |
| 1            |
| 1            |
| 0.5588235294 |
| 1            |
| 0.4166666667 |
| 0.4166666667 |
| 0.4166666667 |
| 0.4166666667 |
| 1            |
| 1            |
| 1            |
| 1            |
| 1            |
| 1            |
| 0.5588235294 |
| 0.25         |
| 0.25         |
| 0.6256684492 |



|              |
|--------------|
| 0.376114082  |
| 0.376114082  |
| 0.376114082  |
| 0.376114082  |
| 1            |
| 0.5588235294 |
| 0.6295677362 |
| 1            |
| 1            |
| 1            |
| 0.376114082  |
| 1            |
| 0.5588235294 |
| 0.4166666667 |
| 1            |
| 1            |
| 1            |
| 1            |
| 1            |
| 0.4166666667 |
| 1            |
| 1            |
| 1            |
| 0.3666803232 |
| 1            |
| 1            |
| 1            |
| 0.6256684492 |
| 0.4178238744 |
| 0.1666666667 |
| 1            |
| 0.4166666667 |
| 0.1666666667 |
| 1            |
| 0.4166666667 |
| 0.4166666667 |
| 1            |
| 0.4166666667 |
| 0.6256684492 |
| 1            |
| 1            |
| 1            |
| 1            |
| 1            |
| 0.4166666667 |
| 1            |
| 0.4166666667 |
| 0.6256684492 |
| 1            |
| 1            |
| 0.1666666667 |

|              |
|--------------|
| 0.6773654476 |
| 1            |
| 0.1666666667 |
| 1            |
| 1            |
| 1            |
| 0.5588235294 |
| 0.6256684492 |
| 0.6773654476 |
| 1            |
| 1            |
| 0.25         |
| 1            |
| 0.376114082  |
| 0.4166666667 |
| 0.4166666667 |
| 0.6256684492 |
| 0.4166666667 |
| 0.1666666667 |
| 0.376114082  |
| 1            |
| 0.4178238744 |
| 1            |
| 1            |
| 1            |
| 0.1247771836 |
| 0.6256684492 |
| 1            |
| 1            |
| 1            |
| 0.376114082  |
| 1            |
| 0.5          |
| 0.6256684492 |
| 1            |
| 0.6295677362 |
| 0.4166666667 |
| 1            |
| 1            |
| 1            |
| 1            |
| 0.25         |
| 1            |
| 0.1666666667 |
| 0.3666803232 |
| 0.4166666667 |
| 0.5          |
| 1            |
| 0.25         |
| 1            |
| 1            |

|              |
|--------------|
| 1            |
| 0.5588235294 |
| 0.4240540589 |
| 1            |
| 1            |
| 1            |
| 1            |
| 0.6256684492 |
| 1            |
| 1            |
| 0.1666666667 |
| 1            |
| 1            |
| 1            |
| 1            |
| 1            |
| 1            |
| 1            |
| 0.4166666667 |
| 0.4166666667 |
| 0.4166666667 |
| 0.4166666667 |
| 1            |
| 0.4166666667 |
| 0.4166666667 |
| 1            |
| 1            |
| 1            |
| 1            |
| 0.5          |
| 0.6256684492 |
| 0.4166666667 |
| 0.1666666667 |
| 0.25         |
| 1            |
| 1            |
| 0.25         |
| 1            |
| 0.4166666667 |
| 0.2869875223 |
| 0.1379790553 |
| 0.6256684492 |
| 0.5          |
| 1            |
| 1            |
| 0.2869875223 |
| 1            |
| 1            |
| 1            |
| 1            |
| 1            |





|              |
|--------------|
| 1            |
| 0.416666667  |
| 1            |
| 0.416666667  |
| 1            |
| 0.416666667  |
| 1            |
| 1            |
| 1            |
| 0.5588235294 |
| 0.5588235294 |
| 0.6773654476 |
| 0.6773654476 |
| 1            |
| 1            |
| 0.416666667  |
| 0.6256684492 |
| 1            |
| 1            |
| 1            |
| 0.2869875223 |
| 0.166666667  |
| 0.416666667  |
| 0.416666667  |
| 0.5588235294 |
| 0.5588235294 |
| 1            |
| 1            |
| 0.5588235294 |
| 0.416666667  |
| 1            |
| 1            |
| 1            |
| 1            |
| 1            |
| 1            |
| 1            |
| 0.416666667  |
| 0.25         |
| 0.5          |
| 0.3666803232 |
| 1            |
| 0.416666667  |
| 1            |
| 1            |
| 0.416666667  |
| 0.416666667  |
| 1            |
| 1            |
| 0.416666667  |
| 0.416666667  |

|              |
|--------------|
| 1            |
| 1            |
| 0.25         |
| 0.416666667  |
| 1            |
| 1            |
| 1            |
| 1            |
| 1            |
| 1            |
| 1            |
| 0.5          |
| 1            |
| 1            |
| 0.416666667  |
| 0.416666667  |
| 1            |
| 0.5          |
| 0.6773654476 |
| 0.2869875223 |
| 1            |
| 0.6256684492 |
| 1            |
| 1            |
| 1            |
| 1            |
| 1            |
| 1            |
| 0.6256684492 |
| 1            |
| 1            |
| 0.416666667  |
| 0.5          |
| 1            |
| 1            |
| 0.25         |
| 1            |
| 0.25         |
| 0.25         |
| 1            |
| 1            |
| 0.5          |
| 0.416666667  |
| 0.5588235294 |
| 0.416666667  |
| 1            |
| 0.416666667  |
| 1            |
| 0.416666667  |
| 1            |
| 0.6256684492 |
| 1            |

|              |
|--------------|
| 1            |
| 1            |
| 1            |
| 1            |
| 0.2869875223 |
| 1            |
| 1            |
| 1            |
| 1            |
| 1            |
| 0.4166666667 |
| 0.4166666667 |
| 0.4166666667 |
| 1            |
| 1            |
| 0.5588235294 |
| 1            |
| 0.376114082  |
| 1            |
| 0.3666803232 |
| 1            |
| 1            |
| 1            |
| 1            |
| 1            |
| 0.4166666667 |
| 0.4178238744 |
| 0.4178238744 |
| 1            |
| 1            |
| 0.5588235294 |
| 0.376114082  |
| 0.4166666667 |
| 1            |
| 1            |
| 1            |
| 0.5588235294 |
| 0.25         |
| 0.376114082  |
| 0.5588235294 |
| 0.5588235294 |
| 0.4166666667 |
| 1            |
| 1            |
| 0.2869875223 |
| 0.1379790553 |
| 0.4166666667 |
| 1            |
| 1            |
| 0.5588235294 |
| 0.5588235294 |

|              |
|--------------|
| 0.416666667  |
| 0.6256684492 |
| 0.6256684492 |
| 1            |
| 0.376114082  |
| 1            |
| 0.6295677362 |
| 0.6256684492 |
| 1            |
| 1            |
| 1            |
| 1            |
| 1            |
| 1            |
| 1            |
| 1            |
| 1            |
| 1            |
| 1            |
| 1            |
| 0.376114082  |
| 1            |
| 0.416666667  |
| 0.5588235294 |
| 0.1379790553 |
| 1            |
| 0.25         |
| 0.416666667  |
| 0.416666667  |
| 1            |
| 1            |
| 0.1379790553 |
| 0.25         |
| 1            |
| 1            |
| 0.5          |
| 1            |
| 1            |
| 1            |
| 1            |
| 1            |
| 1            |
| 1            |
| 1            |
| 1            |
| 1            |
| 1            |
| 1            |
| 0.209972112  |
| 0.209972112  |
| 0.209972112  |
| 0.209972112  |

|              |
|--------------|
| 0.209972112  |
| 0.209972112  |
| 0.209972112  |
| 0.209972112  |
| 0.209972112  |
| 0.209972112  |
| 1            |
| 0.209972112  |
| 1            |
| 1            |
| 1            |
| 1            |
| 1            |
| 1            |
| 1            |
| 1            |
| 1            |
| 1            |
| 1            |
| 1            |
| 0.376114082  |
| 0.376114082  |
| 0.376114082  |
| 0.376114082  |
| 0.376114082  |
| 1            |
| 1            |
| 0.376114082  |
| 1            |
| 1            |
| 1            |
| 1            |
| 0.209972112  |
| 0.209972112  |
| 1            |
| 1            |
| 0.6256684492 |
| 1            |
| 1            |
| 0.25         |
| 0.6256684492 |
| 1            |
| 1            |
| 1            |
| 0.1379790553 |
| 1            |
| 0.376114082  |
| 1            |
| 1            |
| 1            |
| 1            |

|              |
|--------------|
| 0.5          |
| 0.5          |
| 0.166666667  |
| 0.5588235294 |
| 1            |
| 1            |
| 1            |
| 1            |
| 0.5588235294 |
| 1            |
| 0.6256684492 |
| 0.6295677362 |
| 0.5588235294 |
| 1            |
| 0.416666667  |
| 0.5588235294 |
| 0.6256684492 |
| 0.416666667  |
| 0.166666667  |
| 0.6256684492 |
| 1            |
| 1            |
| 0.5588235294 |
| 1            |
| 0.2869875223 |
| 1            |
| 1            |
| 1            |
| 1            |
| 1            |
| 1            |
| 1            |
| 1            |
| 1            |
| 0.1379790553 |
| 0.416666667  |
| 0.5          |
| 1            |
| 1            |
| 1            |
| 0.416666667  |
| 0.416666667  |
| 0.416666667  |
| 1            |
| 0.5588235294 |
| 1            |
| 1            |
| 1            |
| 0.416666667  |
| 1            |
| 1            |

|              |
|--------------|
| 1            |
| 1            |
| 1            |
| 0.5588235294 |
| 1            |
| 1            |
| 1            |
| 1            |
| 1            |
| 0.5          |
| 0.3666803232 |
| 0.4166666667 |
| 1            |
| 0.4178238744 |
| 0.376114082  |
| 1            |
| 1            |
| 0.25         |
| 0.4166666667 |
| 1            |
| 1            |
| 0.25         |
| 0.5588235294 |
| 1            |
| 0.4178238744 |
| 1            |
| 1            |
| 1            |
| 0.5588235294 |
| 0.5588235294 |
| 1            |
| 0.5588235294 |
| 1            |
| 0.6256684492 |
| 1            |
| 1            |
| 1            |
| 1            |
| 0.0637254902 |
| 0.1666666667 |
| 0.1666666667 |
| 1            |
| 0.4166666667 |
| 0.25         |
| 0.25         |
| 0.25         |
| 0.6256684492 |
| 0.5588235294 |
| 0.6256684492 |
| 1            |
| 0.2869875223 |

|              |
|--------------|
| 0.6773654476 |
| 0.1666666667 |
| 1            |
| 0.4166666667 |
| 0.6295677362 |
| 1            |
| 1            |
| 1            |
| 1            |
| 1            |
| 0.6256684492 |
| 0.6256684492 |
| 0.4166666667 |
| 0.6256684492 |
| 0.6256684492 |
| 0.5          |
| 0.5          |
| 0.5          |
| 0.5          |
| 0.5          |
| 0.5          |
| 1            |
| 1            |
| 1            |
| 1            |
| 1            |
| 1            |
| 1            |
| 1            |
| 1            |
| 0.4166666667 |
| 0.4166666667 |
| 0.4166666667 |
| 0.5          |
| 0.5          |
| 0.5588235294 |
| 0.5588235294 |
| 0.5588235294 |
| 1            |
| 1            |
| 1            |
| 1            |
| 1            |
| 0.3666803232 |
| 0.3666803232 |
| 1            |
| 0.5588235294 |
| 1            |
| 1            |
| 0.4166666667 |
| 1            |



|              |
|--------------|
| 1            |
| 1            |
| 1            |
| 1            |
| 1            |
| 1            |
| 1            |
| 1            |
| 1            |
| 1            |
| 1            |
| 1            |
| 0.376114082  |
| 1            |
| 1            |
| 1            |
| 1            |
| 1            |
| 0.2869875223 |
| 1            |
| 1            |
| 0.2869875223 |
| 0.5          |
| 0.6256684492 |
| 1            |
| 1            |
| 0.416666667  |
| 1            |
| 1            |
| 0.416666667  |
| 0.416666667  |
| 1            |
| 1            |
| 1            |
| 1            |
| 1            |
| 1            |
| 1            |
| 1            |
| 1            |
| 1            |
| 1            |
| 1            |
| 1            |
| 0.376114082  |
| 0.416666667  |
| 0.416666667  |
| 1            |
| 1            |
| 1            |
| 0.6256684492 |
| 0.166666667  |
| 1            |

|              |
|--------------|
| 1            |
| 1            |
| 1            |
| 0.416666667  |
| 0.416666667  |
| 0.376114082  |
| 0.6256684492 |
| 1            |
| 0.5588235294 |
| 1            |
| 0.376114082  |
| 1            |
| 1            |
| 1            |
| 1            |
| 1            |
| 0.5588235294 |
| 1            |
| 0.4178238744 |
| 0.6773654476 |
| 1            |
| 0.5          |
| 0.5588235294 |
| 0.376114082  |
| 0.376114082  |
| 0.5          |
| 0.5588235294 |
| 1            |
| 0.5588235294 |
| 0.209972112  |
| 1            |
| 1            |
| 1            |
| 1            |
| 0.416666667  |
| 1            |
| 0.6256684492 |
| 1            |
| 1            |
| 1            |
| 1            |
| 1            |
| 1            |
| 0.6256684492 |
| 0.6256684492 |
| 0.6256684492 |
| 0.25         |
| 0.25         |
| 1            |
| 1            |
| 0.5588235294 |

|              |
|--------------|
| 0.416666667  |
| 1            |
| 0.25         |
| 0.6773654476 |
| 1            |
| 1            |
| 0.3666803232 |
| 0.416666667  |
| 0.416666667  |
| 0.5          |
| 1            |
| 1            |
| 0.5588235294 |
| 1            |
| 1            |
| 1            |
| 1            |
| 0.416666667  |
| 1            |
| 1            |
| 1            |
| 1            |
| 1            |
| 0.5588235294 |
| 0.2869875223 |
| 1            |
| 0.25         |
| 0.5          |
| 0.6256684492 |
| 0.6256684492 |
| 0.6256684492 |
| 1            |
| 1            |
| 0.166666667  |
| 1            |
| 1            |
| 0.4178238744 |
| 1            |
| 0.416666667  |
| 0.416666667  |
| 0.5          |
| 0.6295677362 |
| 1            |
| 1            |
| 0.416666667  |
| 0.416666667  |
| 0.416666667  |
| 0.416666667  |
| 0.6256684492 |
| 0.6256684492 |
| 1            |

|              |
|--------------|
| 1            |
| 1            |
| 0.6256684492 |
| 1            |
| 0.5588235294 |
| 0.6256684492 |
| 1            |
| 1            |
| 1            |
| 0.25         |
| 0.1379790553 |
| 0.2869875223 |
| 0.2869875223 |
| 1            |
| 0.1379790553 |
| 1            |
| 0.2869875223 |
| 1            |
| 1            |
| 1            |
| 0.25         |
| 1            |
| 1            |
| 1            |
| 1            |
| 0.5588235294 |
| 0.061942959  |
| 0.416666667  |
| 1            |
| 1            |
| 1            |
| 1            |
| 0.5588235294 |
| 0.5588235294 |
| 1            |
| 0.416666667  |
| 1            |
| 1            |
| 0.6256684492 |
| 0.5588235294 |
| 0.5588235294 |
| 1            |
| 1            |
| 0.5          |
| 0.5          |
| 0.5          |
| 1            |
| 1            |
| 1            |
| 0.5          |
| 0.6295677362 |

|              |
|--------------|
| 0.5588235294 |
| 0.5588235294 |
| 0.5588235294 |
| 0.2869875223 |
| 0.5          |
| 0.5          |
| 0.5          |
| 0.5          |
| 0.5          |
| 0.5          |
| 1            |
| 0.4166666667 |
| 1            |
| 1            |
| 0.5588235294 |
| 0.1247771836 |
| 0.376114082  |
| 1            |
| 0.25         |
| 0.5          |
| 1            |
| 1            |
| 0.4166666667 |
| 1            |
| 0.5588235294 |
| 0.6256684492 |
| 1            |
| 0.4166666667 |
| 1            |
| 1            |
| 1            |
| 1            |
| 1            |
| 0.376114082  |
| 1            |
| 0.6256684492 |
| 0.6256684492 |
| 1            |
| 0.4166666667 |
| 0.376114082  |
| 0.4166666667 |
| 0.25         |
| 0.376114082  |
| 1            |
| 1            |
| 0.5588235294 |
| 0.4166666667 |
| 0.1666666667 |
| 0.25         |
| 0.5588235294 |
| 0.25         |

|              |
|--------------|
| 1            |
| 0.5          |
| 0.5588235294 |
| 0.6256684492 |
| 0.25         |
| 1            |
| 1            |
| 1            |
| 1            |
| 0.6256684492 |
| 1            |
| 1            |
| 1            |
| 1            |
| 0.1666666667 |
| 0.4166666667 |
| 0.6256684492 |
| 1            |
| 0.25         |
| 0.25         |
| 1            |
| 0.5          |
| 0.5588235294 |
| 0.4166666667 |
| 0.5          |
| 1            |
| 0.4166666667 |
| 0.1666666667 |
| 0.5          |
| 1            |
| 0.5          |
| 0.2869875223 |
| 1            |
| 1            |
| 0.25         |
| 0.5588235294 |
| 0.4166666667 |
| 0.4166666667 |
| 0.376114082  |
| 0.6256684492 |
| 1            |
| 1            |
| 0.5588235294 |
| 0.6256684492 |
| 1            |
| 0.4166666667 |
| 0.5588235294 |
| 0.209972112  |
| 1            |
| 1            |
| 0.5          |

|               |
|---------------|
| 1             |
| 1             |
| 1             |
| 0.5588235294  |
| 0.03042881375 |
| 0.376114082   |
| 1             |
| 1             |
| 1             |
| 1             |
| 1             |
| 0.376114082   |
| 0.5588235294  |
| 0.6256684492  |
| 0.4166666667  |
| 0.4166666667  |
| 1             |
| 1             |
| 1             |
| 0.1247771836  |
| 0.209972112   |
| 0.376114082   |
| 1             |
| 1             |
| 1             |
| 1             |
| 0.376114082   |
| 0.4166666667  |
| 0.25          |
| 1             |
| 0.6256684492  |
| 0.6256684492  |
| 1             |
| 1             |
| 0.6256684492  |
| 0.6256684492  |
| 1             |
| 1             |
| 1             |
| 0.6773654476  |
| 0.4166666667  |
| 0.3666803232  |
| 0.3666803232  |
| 0.3666803232  |
| 1             |
| 1             |
| 0.4178238744  |
| 1             |
| 0.3666803232  |
| 0.6256684492  |
| 0.6256684492  |

|              |
|--------------|
| 0.6256684492 |
| 0.6256684492 |
| 0.4166666667 |
| 0.2869875223 |
| 1            |
| 1            |
| 1            |
| 1            |
| 0.1379790553 |
| 0.6295677362 |
| 1            |
| 1            |
| 0.25         |
| 1            |
| 1            |
| 0.6256684492 |
| 1            |
| 0.4166666667 |
| 0.0637254902 |
| 0.0637254902 |
| 1            |
| 1            |
| 0.4166666667 |
| 1            |
| 1            |
| 1            |
| 1            |
| 0.4166666667 |
| 0.5588235294 |
| 1            |
| 1            |
| 1            |
| 1            |
| 1            |
| 1            |
| 0.4166666667 |
| 0.5588235294 |
| 0.4166666667 |
| 0.25         |
| 0.4166666667 |
| 0.6256684492 |
| 0.6256684492 |
| 1            |
| 1            |
| 1            |
| 1            |
| 0.7210233593 |
| 0.7210233593 |
| 1            |
| 1            |



|              |
|--------------|
| 0.2869875223 |
| 0.5588235294 |
| 0.4166666667 |
| 0.4166666667 |
| 1            |
| 0.4166666667 |
| 0.6256684492 |
| 0.6256684492 |
| 0.5          |
| 1            |
| 1            |
| 1            |
| 1            |
| 1            |
| 0.5          |
| 1            |
| 1            |
| 1            |
| 0.2869875223 |
| 0.4166666667 |
| 0.4166666667 |
| 0.4166666667 |
| 1            |
| 0.5588235294 |
| 1            |
| 0.6256684492 |
| 0.25         |
| 1            |
| 0.5588235294 |
| 0.061942959  |
| 0.2869875223 |
| 1            |
| 1            |
| 0.1666666667 |
| 1            |
| 1            |
| 1            |
| 0.5588235294 |
| 1            |
| 1            |
| 0.1666666667 |
| 1            |
| 0.4166666667 |
| 1            |
| 1            |
| 1            |
| 0.4166666667 |
| 1            |
| 0.4166666667 |
| 1            |
| 1            |

|              |
|--------------|
| 0.5          |
| 1            |
| 0.5588235294 |
| 0.6256684492 |
| 0.5588235294 |
| 1            |
| 0.4166666667 |
| 0.376114082  |
| 0.6256684492 |
| 0.4166666667 |
| 1            |
| 0.4166666667 |
| 1            |
| 0.5588235294 |
| 1            |
| 0.6256684492 |
| 1            |
| 1            |
| 1            |
| 0.7210233593 |
| 1            |
| 0.25         |
| 0.25         |
| 0.2869875223 |
| 0.2869875223 |
| 0.1666666667 |
| 1            |
| 0.25         |
| 1            |
| 1            |
| 0.1379790553 |
| 0.1379790553 |
| 0.6773654476 |
| 0.6256684492 |
| 0.4166666667 |
| 0.4166666667 |
| 0.5          |
| 1            |
| 0.5588235294 |
| 0.5588235294 |
| 1            |
| 1            |
| 1            |
| 1            |
| 1            |
| 0.5588235294 |
| 1            |
| 1            |
| 1            |
| 1            |
| 1            |

|              |
|--------------|
| 0.6256684492 |
| 1            |
| 0.4166666667 |
| 1            |
| 1            |
| 1            |
| 0.5588235294 |
| 0.4166666667 |
| 0.5          |
| 1            |
| 1            |
| 0.5588235294 |
| 0.5588235294 |
| 0.5588235294 |
| 1            |
| 1            |
| 0.5          |
| 0.5          |
| 0.1666666667 |
| 1            |
| 0.4166666667 |
| 0.5          |
| 0.209972112  |
| 0.5588235294 |
| 0.5588235294 |
| 0.5          |
| 0.6773654476 |
| 1            |
| 1            |
| 0.4166666667 |
| 1            |
| 1            |
| 1            |
| 1            |
| 0.4166666667 |
| 0.061942959  |
| 0.061942959  |
| 0.4166666667 |
| 0.6256684492 |
| 0.6256684492 |
| 1            |
| 1            |
| 1            |
| 1            |
| 1            |
| 1            |
| 1            |
| 1            |
| 0.6256684492 |
| 1            |
| 0.4166666667 |

|              |
|--------------|
| 0.416666667  |
| 0.5588235294 |
| 0.166666667  |
| 0.061942959  |
| 0.416666667  |
| 0.5          |
| 0.416666667  |
| 0.6295677362 |
| 1            |
| 1            |
| 0.416666667  |
| 1            |
| 0.25         |
| 0.376114082  |
| 0.166666667  |
| 0.25         |
| 0.25         |
| 0.6256684492 |
| 1            |
| 1            |
| 0.5588235294 |
| 0.5          |
| 0.376114082  |
| 0.25         |
| 0.5          |
| 0.6256684492 |
| 1            |
| 1            |
| 1            |
| 0.166666667  |
| 0.166666667  |
| 1            |
| 1            |
| 0.416666667  |
| 0.5588235294 |
| 1            |
| 0.5          |
| 1            |
| 1            |
| 1            |
| 1            |
| 0.416666667  |
| 0.209972112  |
| 0.416666667  |
| 0.416666667  |
| 0.416666667  |
| 0.1379790553 |
| 1            |
| 1            |
| 1            |
| 1            |

|              |
|--------------|
| 1            |
| 0.5588235294 |
| 1            |
| 0.4166666667 |
| 1            |
| 1            |
| 0.5588235294 |
| 1            |
| 0.5588235294 |
| 0.25         |
| 0.5588235294 |
| 0.6256684492 |
| 1            |
| 1            |
| 0.6256684492 |
| 0.5588235294 |
| 1            |
| 1            |
| 1            |
| 1            |
| 0.5588235294 |
| 0.5588235294 |
| 0.5588235294 |
| 0.5          |
| 1            |
| 1            |
| 0.6773654476 |
| 0.6773654476 |
| 0.2869875223 |
| 0.6256684492 |
| 1            |
| 1            |
| 0.5588235294 |
| 1            |
| 1            |
| 1            |
| 0.5          |
| 1            |
| 1            |
| 1            |
| 1            |
| 1            |
| 1            |
| 0.5          |
| 1            |
| 0.4166666667 |
| 1            |
| 0.5588235294 |
| 1            |
| 1            |
| 1            |
| 1            |

|              |
|--------------|
| 0.416666667  |
| 1            |
| 1            |
| 1            |
| 1            |
| 1            |
| 1            |
| 0.416666667  |
| 0.5588235294 |
| 0.416666667  |
| 1            |
| 1            |
| 1            |
| 1            |
| 1            |
| 1            |
| 1            |
| 0.416666667  |
| 1            |
| 1            |
| 1            |
| 1            |
| 1            |
| 1            |
| 1            |
| 0.25         |
| 0.5588235294 |
| 0.061942959  |
| 1            |
| 0.416666667  |
| 1            |
| 1            |
| 1            |
| 1            |
| 0.25         |
| 0.5588235294 |
| 0.166666667  |
| 1            |
| 0.416666667  |
| 0.5588235294 |
| 0.5588235294 |
| 1            |
| 0.2869875223 |
| 0.5588235294 |
| 0.6256684492 |
| 0.3666803232 |
| 1            |
| 1            |
| 0.5588235294 |
| 0.5588235294 |
| 0.5588235294 |

|              |
|--------------|
| 1            |
| 1            |
| 1            |
| 0.416666667  |
| 0.416666667  |
| 0.5588235294 |
| 0.5          |
| 1            |
| 1            |
| 0.6256684492 |
| 0.25         |
| 1            |
| 1            |
| 0.6256684492 |
| 0.6256684492 |
| 0.416666667  |
| 1            |
| 1            |
| 1            |
| 0.416666667  |
| 1            |
| 1            |
| 1            |
| 0.061942959  |
| 0.416666667  |
| 0.5588235294 |
| 0.1379790553 |
| 1            |
| 0.6256684492 |
| 0.6256684492 |
| 1            |
| 1            |
| 0.5588235294 |
| 1            |
| 0.416666667  |
| 1            |
| 0.5588235294 |
| 1            |
| 1            |
| 1            |
| 0.6256684492 |
| 1            |
| 0.5588235294 |
| 0.1379790553 |
| 0.1379790553 |
| 0.166666667  |
| 1            |
| 0.5588235294 |
| 0.6256684492 |
| 0.25         |
| 1            |

|              |
|--------------|
| 0.376114082  |
| 0.376114082  |
| 0.416666667  |
| 0.416666667  |
| 0.6256684492 |
| 1            |
| 1            |
| 1            |
| 1            |
| 0.416666667  |
| 1            |
| 0.25         |
| 1            |
| 0.25         |
| 0.5588235294 |
| 0.5588235294 |
| 1            |
| 1            |
| 0.2869875223 |
| 1            |
| 0.6256684492 |
| 0.416666667  |
| 0.6773654476 |
| 0.5588235294 |
| 1            |
| 0.5588235294 |
| 0.5588235294 |
| 1            |
| 0.6773654476 |
| 0.5588235294 |
| 1            |
| 1            |
| 0.416666667  |
| 0.416666667  |
| 0.25         |
| 1            |
| 0.25         |
| 0.416666667  |
| 1            |
| 1            |
| 1            |
| 1            |
| 1            |
| 0.25         |
| 1            |
| 1            |
| 1            |
| 1            |
| 0.166666667  |
| 1            |
| 0.416666667  |



|              |
|--------------|
| 1            |
| 0.4166666667 |
| 0.5588235294 |
| 1            |
| 1            |
| 1            |
| 1            |
| 1            |
| 1            |
| 1            |
| 1            |
| 1            |
| 0.209972112  |
| 0.1666666667 |
| 0.1666666667 |
| 0.1666666667 |
| 0.6256684492 |
| 1            |
| 0.376114082  |
| 1            |
| 1            |
| 1            |
| 0.5588235294 |
| 1            |
| 1            |
| 1            |
| 1            |
| 0.376114082  |
| 0.6773654476 |
| 0.4166666667 |
| 0.5588235294 |
| 0.376114082  |
| 0.5          |
| 1            |
| 0.1666666667 |
| 1            |
| 1            |
| 0.4166666667 |
| 0.4166666667 |
| 0.2869875223 |
| 0.4166666667 |
| 0.6256684492 |
| 1            |
| 0.6256684492 |
| 1            |
| 0.5588235294 |
| 0.5588235294 |
| 1            |
| 0.4166666667 |
| 0.5588235294 |
| 0.4166666667 |

|              |
|--------------|
| 0.4178238744 |
| 0.4166666667 |
| 0.4178238744 |
| 0.5588235294 |
| 1            |
| 0.4178238744 |
| 0.4166666667 |
| 0.4166666667 |
| 1            |
| 1            |
| 0.4166666667 |
| 0.376114082  |
| 1            |
| 1            |
| 1            |
| 1            |
| 1            |
| 0.6256684492 |
| 0.3666803232 |
| 0.5          |
| 0.4166666667 |
| 1            |
| 0.376114082  |
| 1            |
| 1            |
| 0.5          |
| 1            |
| 0.25         |
| 1            |
| 0.6256684492 |
| 1            |
| 1            |
| 1            |
| 0.5588235294 |
| 0.4166666667 |
| 1            |
| 1            |
| 1            |
| 1            |
| 1            |
| 1            |
| 0.5          |
| 0.4166666667 |
| 1            |
| 1            |
| 0.1379790553 |
| 1            |
| 1            |
| 0.5          |
| 0.6256684492 |
| 0.1666666667 |

|              |
|--------------|
| 1            |
| 0.416666667  |
| 0.376114082  |
| 0.376114082  |
| 1            |
| 0.1379790553 |
| 1            |
| 1            |
| 0.5588235294 |
| 1            |
| 1            |
| 0.25         |
| 1            |
| 0.416666667  |
| 1            |
| 1            |
| 1            |
| 1            |
| 0.416666667  |
| 1            |
| 1            |
| 1            |
| 0.416666667  |
| 0.061942959  |
| 1            |
| 1            |
| 1            |
| 0.5588235294 |
| 0.6295677362 |
| 0.6295677362 |
| 1            |
| 0.25         |
| 0.2869875223 |
| 1            |
| 0.6295677362 |
| 1            |
| 1            |
| 0.5          |
| 0.166666667  |
| 0.6773654476 |
| 1            |
| 1            |
| 1            |
| 1            |
| 0.2869875223 |
| 0.2869875223 |
| 1            |
| 0.416666667  |
| 0.416666667  |
| 1            |
| 1            |

|              |
|--------------|
| 1            |
| 0.5588235294 |
| 1            |
| 0.5588235294 |
| 1            |
| 1            |
| 1            |
| 1            |
| 1            |
| 1            |
| 1            |
| 0.4166666667 |
| 1            |
| 0.1379790553 |
| 1            |
| 0.4166666667 |
| 1            |
| 1            |
| 1            |
| 0.4166666667 |
| 0.5          |
| 1            |
| 0.6256684492 |
| 0.5588235294 |
| 0.5588235294 |
| 1            |
| 0.3666803232 |
| 0.3666803232 |
| 0.3666803232 |
| 0.6256684492 |
| 0.6256684492 |
| 0.6256684492 |
| 0.6256684492 |
| 0.6256684492 |
| 0.209972112  |
| 0.6256684492 |
| 0.6256684492 |
| 0.209972112  |
| 1            |
| 1            |
| 0.4240540589 |
| 1            |
| 0.5588235294 |
| 1            |
| 1            |
| 1            |
| 0.1666666667 |
| 1            |
| 0.5588235294 |
| 0.061942959  |
| 1            |
| 1            |

|              |
|--------------|
| 0.416666667  |
| 0.5588235294 |
| 1            |
| 0.3666803232 |
| 0.3666803232 |
| 1            |
| 1            |
| 1            |
| 0.209972112  |
| 0.5588235294 |
| 1            |
| 0.209972112  |
| 0.5          |
| 1            |
| 1            |
| 1            |
| 1            |
| 1            |
| 1            |
| 1            |
| 0.25         |
| 0.5588235294 |
| 0.6256684492 |
| 1            |
| 0.209972112  |
| 0.5588235294 |
| 0.209972112  |
| 0.209972112  |
| 0.6256684492 |
| 0.5588235294 |
| 1            |
| 0.25         |
| 1            |
| 1            |
| 1            |
| 1            |
| 1            |
| 1            |
| 1            |
| 1            |
| 1            |
| 0.4178238744 |
| 1            |
| 0.166666667  |
| 0.5588235294 |
| 0.2869875223 |
| 0.2869875223 |
| 1            |
| 0.6295677362 |
| 1            |
| 1            |
| 0.6295677362 |
| 1            |
| 0.5588235294 |

|              |
|--------------|
| 1            |
| 1            |
| 1            |
| 0.166666667  |
| 0.25         |
| 0.5588235294 |
| 0.209972112  |
| 1            |
| 1            |
| 1            |
| 0.209972112  |
| 1            |
| 1            |
| 0.416666667  |
| 1            |
| 0.166666667  |
| 0.6940287188 |
| 1            |
| 1            |
| 1            |
| 1            |
| 1            |
| 0.5          |
| 1            |
| 0.5          |
| 0.5          |
| 1            |
| 1            |
| 1            |
| 1            |
| 1            |
| 0.3666803232 |
| 0.3666803232 |
| 0.416666667  |
| 1            |
| 0.416666667  |
| 0.416666667  |
| 0.416666667  |
| 1            |
| 1            |
| 0.416666667  |
| 0.6773654476 |
| 0.6773654476 |
| 0.25         |
| 1            |
| 1            |
| 0.416666667  |
| 0.416666667  |
| 0.416666667  |
| 0.376114082  |
| 0.416666667  |

|              |
|--------------|
| 0.416666667  |
| 0.416666667  |
| 1            |
| 1            |
| 1            |
| 0.5588235294 |
| 0.416666667  |
| 0.166666667  |
| 1            |
| 0.416666667  |
| 1            |
| 1            |
| 0.6256684492 |
| 1            |
| 1            |
| 1            |
| 1            |
| 1            |
| 1            |
| 0.5588235294 |
| 0.6256684492 |
| 0.1379790553 |
| 1            |
| 0.2869875223 |
| 1            |
| 1            |
| 0.5          |
| 0.5          |
| 1            |
| 1            |
| 0.416666667  |
| 1            |
| 0.2869875223 |
| 1            |
| 0.6256684492 |
| 1            |
| 0.416666667  |
| 0.5588235294 |
| 1            |
| 0.5588235294 |
| 0.416666667  |
| 1            |
| 1            |
| 1            |
| 1            |
| 0.6256684492 |
| 1            |
| 1            |
| 1            |
| 1            |
| 0.416666667  |

|              |
|--------------|
| 0.416666667  |
| 1            |
| 0.6256684492 |
| 0.416666667  |
| 0.5588235294 |
| 1            |
| 0.5588235294 |
| 0.6256684492 |
| 1            |
| 0.5          |
| 0.416666667  |
| 0.5588235294 |
| 0.5588235294 |
| 0.416666667  |
| 1            |
| 0.5588235294 |
| 0.416666667  |
| 0.5          |
| 1            |
| 0.25         |
| 0.416666667  |
| 0.6256684492 |
| 0.416666667  |
| 0.416666667  |
| 0.416666667  |
| 1            |
| 0.25         |
| 1            |
| 0.25         |
| 0.25         |
| 0.6256684492 |
| 0.5          |
| 1            |
| 0.6256684492 |
| 0.5588235294 |
| 1            |
| 0.25         |
| 0.25         |
| 0.25         |
| 0.25         |
| 0.25         |
| 0.25         |
| 1            |
| 1            |
| 0.416666667  |
| 1            |
| 0.25         |
| 1            |
| 1            |
| 0.5588235294 |
| 0.6256684492 |
| 0.6256684492 |



|              |
|--------------|
| 0.6256684492 |
| 0.6256684492 |
| 0.6256684492 |
| 0.25         |
| 0.25         |
| 0.25         |
| 0.6256684492 |
| 1            |
| 1            |
| 1            |
| 1            |
| 1            |
| 0.5          |
| 1            |
| 1            |
| 1            |
| 1            |
| 1            |
| 1            |
| 0.166666667  |
| 1            |
| 1            |
| 1            |
| 0.1379790553 |
| 0.376114082  |
| 1            |
| 1            |
| 1            |
| 0.416666667  |
| 0.416666667  |
| 1            |
| 1            |
| 1            |
| 1            |
| 1            |
| 1            |
| 0.6256684492 |
| 0.416666667  |
| 0.416666667  |
| 1            |
| 1            |
| 1            |
| 1            |
| 1            |
| 1            |
| 1            |
| 1            |
| 1            |
| 1            |
| 0.416666667  |
| 1            |

|              |
|--------------|
| 1            |
| 1            |
| 1            |
| 0.416666667  |
| 0.416666667  |
| 1            |
| 1            |
| 1            |
| 0.5588235294 |
| 1            |
| 0.5588235294 |
| 1            |
| 0.376114082  |
| 0.6256684492 |
| 0.25         |
| 1            |
| 1            |
| 1            |
| 1            |
| 1            |
| 0.061942959  |
| 1            |
| 1            |
| 1            |
| 0.416666667  |
| 1            |
| 0.5588235294 |
| 0.25         |
| 0.5588235294 |
| 0.416666667  |
| 1            |
| 0.416666667  |
| 1            |
| 0.6256684492 |
| 1            |
| 1            |
| 1            |
| 1            |
| 0.416666667  |
| 0.4178238744 |
| 1            |
| 1            |
| 0.3666803232 |
| 1            |
| 0.6773654476 |
| 1            |
| 0.5          |
| 1            |
| 0.2869875223 |
| 1            |
| 1            |



|              |
|--------------|
| 1            |
| 0.5          |
| 0.5          |
| 0.5588235294 |
| 0.5588235294 |
| 1            |
| 1            |
| 0.25         |
| 0.25         |
| 0.4166666667 |
| 1            |
| 0.6256684492 |
| 0.6256684492 |
| 0.6256684492 |
| 0.6256684492 |
| 0.6256684492 |
| 0.6256684492 |
| 0.25         |
| 0.25         |
| 0.4166666667 |
| 1            |
| 1            |
| 1            |
| 1            |
| 0.4166666667 |
| 0.1666666667 |
| 0.4178238744 |
| 1            |
| 0.5588235294 |
| 1            |
| 1            |
| 1            |
| 0.4166666667 |
| 0.6295677362 |
| 1            |
| 1            |
| 1            |
| 1            |
| 0.4166666667 |
| 0.376114082  |
| 1            |
| 1            |
| 0.4166666667 |
| 1            |
| 1            |
| 0.4166666667 |
| 0.4166666667 |
| 0.4166666667 |
| 1            |
| 1            |
| 1            |

|              |
|--------------|
| 0.416666667  |
| 0.209972112  |
| 0.6940287188 |
| 0.209972112  |
| 0.209972112  |
| 1            |
| 0.416666667  |
| 1            |
| 0.2869875223 |
| 0.416666667  |
| 0.3666803232 |
| 0.416666667  |
| 1            |
| 0.5588235294 |
| 1            |
| 0.2869875223 |
| 1            |
| 1            |
| 0.6256684492 |
| 0.6256684492 |
| 0.2869875223 |
| 1            |
| 0.416666667  |
| 0.416666667  |
| 1            |
| 0.5588235294 |
| 1            |
| 1            |
| 1            |
| 0.5588235294 |
| 0.416666667  |
| 0.416666667  |
| 0.166666667  |
| 1            |
| 1            |
| 1            |
| 1            |
| 1            |
| 1            |
| 1            |
| 0.25         |
| 1            |
| 0.25         |
| 0.25         |
| 0.6256684492 |
| 0.416666667  |
| 1            |
| 1            |
| 1            |
| 1            |
| 0.209972112  |



|              |
|--------------|
| 1            |
| 0.5588235294 |
| 0.4166666667 |
| 0.1247771836 |
| 1            |
| 1            |
| 1            |
| 0.5588235294 |
| 1            |
| 0.6256684492 |
| 0.6256684492 |
| 0.6256684492 |
| 0.6256684492 |
| 1            |
| 0.4166666667 |
| 0.376114082  |
| 0.4166666667 |
| 1            |
| 1            |
| 0.6256684492 |
| 1            |
| 1            |
| 1            |
| 1            |
| 0.6256684492 |
| 0.5588235294 |
| 1            |
| 1            |
| 0.5          |
| 0.5588235294 |
| 0.4166666667 |
| 1            |
| 0.4166666667 |
| 0.6295677362 |
| 1            |
| 1            |
| 0.25         |
| 1            |
| 1            |
| 1            |
| 0.5          |
| 1            |
| 0.4166666667 |
| 1            |
| 0.4166666667 |
| 0.5588235294 |
| 1            |
| 1            |
| 1            |
| 0.5588235294 |
| 0.6256684492 |

|              |
|--------------|
| 0.6256684492 |
| 0.6256684492 |
| 0.376114082  |
| 1            |
| 1            |
| 1            |
| 1            |
| 1            |
| 1            |
| 0.1666666667 |
| 1            |
| 1            |
| 0.4166666667 |
| 1            |
| 0.4166666667 |
| 0.5          |
| 0.4166666667 |
| 0.4166666667 |
| 1            |
| 1            |
| 1            |
| 1            |
| 1            |
| 1            |
| 1            |
| 0.5588235294 |
| 0.4166666667 |
| 1            |
| 0.5588235294 |
| 1            |
| 1            |
| 0.4166666667 |
| 0.1247771836 |
| 0.5          |
| 1            |
| 1            |
| 0.4166666667 |
| 0.4166666667 |
| 1            |
| 1            |
| 0.25         |
| 0.4166666667 |
| 1            |
| 0.4166666667 |
| 1            |
| 0.4166666667 |
| 0.5588235294 |
| 1            |
| 1            |
| 0.4166666667 |
| 0.4166666667 |



|              |
|--------------|
| 0.6256684492 |
| 1            |
| 1            |
| 0.1666666667 |
| 1            |
| 1            |
| 1            |
| 1            |
| 0.5588235294 |
| 1            |
| 0.5          |
| 1            |
| 1            |
| 0.4166666667 |
| 0.5          |
| 1            |
| 0.2869875223 |
| 0.2869875223 |
| 0.5588235294 |
| 0.4166666667 |
| 0.4166666667 |
| 0.5588235294 |
| 1            |
| 0.5          |
| 1            |
| 0.25         |
| 0.25         |
| 1            |
| 0.5          |
| 0.5          |
| 1            |
| 1            |
| 0.4166666667 |
| 0.5          |
| 1            |
| 1            |
| 1            |
| 1            |
| 1            |
| 0.4178238744 |
| 1            |
| 1            |
| 0.5588235294 |
| 1            |
| 0.376114082  |
| 0.4166666667 |
| 0.1666666667 |
| 1            |
| 0.5588235294 |
| 0.5588235294 |
| 1            |

|              |
|--------------|
| 0.5588235294 |
| 1            |
| 1            |
| 1            |
| 0.376114082  |
| 1            |
| 0.6256684492 |
| 1            |
| 1            |
| 1            |
| 1            |
| 1            |
| 1            |
| 1            |
| 1            |
| 1            |
| 1            |
| 0.4166666667 |
| 1            |
| 0.4166666667 |
| 0.1666666667 |
| 1            |
| 0.4166666667 |
| 0.4166666667 |
| 1            |
| 0.4166666667 |
| 0.4166666667 |
| 1            |
| 1            |
| 0.2869875223 |
| 1            |
| 1            |
| 1            |
| 1            |
| 0.1666666667 |
| 0.4166666667 |
| 1            |
| 1            |
| 0.6295677362 |
| 1            |
| 1            |
| 0.25         |
| 0.25         |
| 0.5          |
| 0.4166666667 |
| 0.4166666667 |
| 1            |
| 0.6773654476 |
| 1            |
| 1            |
| 1            |

|              |
|--------------|
| 0.6256684492 |
| 1            |
| 1            |
| 0.6256684492 |
| 0.5588235294 |
| 1            |
| 1            |
| 1            |
| 0.4166666667 |
| 1            |
| 1            |
| 1            |
| 1            |
| 0.25         |
| 1            |
| 1            |
| 1            |
| 1            |
| 0.4166666667 |
| 0.4166666667 |
| 1            |
| 1            |
| 1            |
| 0.4166666667 |
| 0.2869875223 |
| 0.25         |
| 0.209972112  |
| 1            |
| 1            |
| 0.6256684492 |
| 1            |
| 0.6256684492 |
| 0.4166666667 |
| 1            |
| 0.061942959  |
| 1            |
| 1            |
| 0.376114082  |
| 1            |
| 1            |
| 0.1666666667 |
| 1            |
| 1            |
| 0.2869875223 |
| 0.4166666667 |
| 0.6773654476 |
| 1            |
| 1            |
| 1            |
| 0.6256684492 |
| 0.5588235294 |

|              |
|--------------|
| 1            |
| 1            |
| 0.5588235294 |
| 0.1666666667 |
| 1            |
| 1            |
| 1            |
| 0.376114082  |
| 1            |
| 1            |
| 1            |
| 1            |
| 1            |
| 1            |
| 0.25         |
| 1            |
| 0.6295677362 |
| 0.5588235294 |
| 0.5          |
| 0.5          |
| 1            |
| 0.5588235294 |
| 0.4178238744 |
| 1            |
| 0.4166666667 |
| 0.6256684492 |
| 1            |
| 1            |
| 1            |
| 1            |
| 1            |
| 1            |
| 1            |
| 1            |
| 0.4166666667 |
| 1            |
| 1            |
| 0.376114082  |
| 1            |
| 1            |
| 0.6295677362 |
| 0.25         |
| 1            |
| 1            |
| 1            |
| 1            |
| 0.4166666667 |
| 0.1666666667 |
| 0.4166666667 |
| 1            |
| 1            |

|              |
|--------------|
| 1            |
| 0.6256684492 |
| 0.6256684492 |
| 1            |
| 1            |
| 1            |
| 1            |
| 1            |
| 1            |
| 1            |
| 1            |
| 0.5          |
| 0.25         |
| 1            |
| 0.5          |
| 0.6295677362 |
| 1            |
| 0.1666666667 |
| 0.376114082  |
| 0.4166666667 |
| 0.4166666667 |
| 0.4166666667 |
| 0.4166666667 |
| 1            |
| 0.5588235294 |
| 0.4178238744 |
| 1            |
| 1            |
| 1            |
| 0.2869875223 |
| 1            |
| 0.4166666667 |
| 0.4166666667 |
| 0.5          |
| 0.376114082  |
| 1            |
| 0.2869875223 |
| 1            |
| 0.4166666667 |
| 0.4166666667 |
| 1            |
| 0.5588235294 |
| 0.5          |
| 1            |
| 1            |
| 1            |
| 0.4166666667 |
| 0.4178238744 |
| 0.4178238744 |
| 0.5          |
| 1            |
| 0.5588235294 |

|              |
|--------------|
| 0.416666667  |
| 0.166666667  |
| 1            |
| 1            |
| 0.5588235294 |
| 0.376114082  |
| 1            |
| 1            |
| 1            |
| 0.5588235294 |
| 1            |
| 1            |
| 0.1379790553 |
| 1            |
| 1            |
| 0.6256684492 |
| 1            |
| 1            |
| 1            |
| 0.5588235294 |
| 0.25         |
| 1            |
| 0.416666667  |
| 1            |
| 0.25         |
| 1            |
| 1            |
| 1            |
| 1            |
| 1            |
| 0.1379790553 |
| 0.5588235294 |
| 0.376114082  |
| 1            |
| 0.6256684492 |
| 1            |
| 1            |
| 1            |
| 1            |
| 1            |
| 0.209972112  |
| 1            |
| 0.5          |
| 1            |
| 1            |
| 1            |
| 1            |
| 1            |
| 1            |
| 1            |
| 0.1247771836 |
| 1            |
| 1            |

|              |
|--------------|
| 1            |
| 0.1247771836 |
| 1            |
| 1            |
| 1            |
| 0.4240540589 |
| 1            |
| 0.6295677362 |
| 0.25         |
| 0.4240540589 |
| 0.25         |
| 1            |
| 0.5          |
| 1            |
| 1            |
| 0.6256684492 |
| 0.4166666667 |
| 1            |
| 0.376114082  |
| 0.061942959  |
| 1            |
| 1            |
| 0.6256684492 |
| 0.6256684492 |
| 1            |
| 0.4166666667 |
| 0.4166666667 |
| 0.25         |
| 0.25         |
| 1            |
| 1            |
| 0.1666666667 |
| 1            |
| 1            |
| 1            |
| 1            |
| 1            |
| 0.25         |
| 0.2869875223 |
| 0.6256684492 |
| 1            |
| 0.1666666667 |
| 0.4166666667 |
| 0.6295677362 |
| 1            |
| 0.4166666667 |
| 0.25         |
| 0.5588235294 |
| 1            |
| 0.5          |
| 0.4166666667 |

|              |
|--------------|
| 1            |
| 1            |
| 1            |
| 1            |
| 0.376114082  |
| 1            |
| 0.5          |
| 0.416666667  |
| 0.2869875223 |
| 1            |
| 0.2869875223 |
| 0.416666667  |
| 0.416666667  |
| 0.5588235294 |
| 0.166666667  |
| 0.2869875223 |
| 0.416666667  |
| 0.416666667  |
| 1            |
| 0.6256684492 |
| 0.25         |
| 1            |
| 1            |
| 0.1379790553 |
| 1            |
| 0.2869875223 |
| 0.416666667  |
| 0.376114082  |
| 1            |
| 1            |
| 0.416666667  |
| 0.166666667  |
| 1            |
| 0.416666667  |
| 1            |
| 1            |
| 0.376114082  |
| 0.25         |
| 0.5588235294 |
| 0.416666667  |
| 1            |
| 1            |
| 0.6256684492 |
| 1            |
| 0.1379790553 |
| 1            |
| 1            |
| 0.25         |
| 0.3666803232 |
| 1            |
| 0.5588235294 |



|              |
|--------------|
| 1            |
| 1            |
| 0.416666667  |
| 1            |
| 0.25         |
| 0.416666667  |
| 1            |
| 1            |
| 0.416666667  |
| 0.25         |
| 0.416666667  |
| 1            |
| 1            |
| 1            |
| 1            |
| 1            |
| 1            |
| 1            |
| 1            |
| 1            |
| 0.6256684492 |
| 0.6256684492 |
| 1            |
| 1            |
| 1            |
| 1            |
| 1            |
| 1            |
| 1            |
| 0.6256684492 |
| 0.416666667  |
| 1            |
| 0.416666667  |
| 0.6256684492 |
| 1            |
| 1            |
| 0.2869875223 |
| 1            |
| 0.25         |
| 1            |
| 1            |
| 1            |
| 1            |
| 1            |
| 1            |
| 1            |
| 1            |
| 0.166666667  |
| 0.5588235294 |
| 0.166666667  |
| 0.5588235294 |
| 1            |

|              |
|--------------|
| 1            |
| 0.4178238744 |
| 0.4166666667 |
| 1            |
| 0.5          |
| 0.4166666667 |
| 0.5588235294 |
| 0.25         |
| 0.4166666667 |
| 1            |
| 0.5588235294 |
| 1            |
| 0.4166666667 |
| 0.6256684492 |
| 0.25         |
| 0.4166666667 |
| 0.2869875223 |
| 0.2869875223 |
| 1            |
| 1            |
| 1            |
| 1            |
| 1            |
| 0.6256684492 |
| 1            |
| 1            |
| 1            |
| 1            |
| 1            |
| 1            |
| 0.2869875223 |
| 1            |
| 1            |
| 1            |
| 1            |
| 0.061942959  |
| 1            |
| 0.376114082  |
| 1            |
| 1            |
| 1            |
| 1            |
| 1            |
| 1            |
| 1            |
| 1            |
| 1            |
| 1            |
| 0.5          |
| 0.5          |
| 1            |
| 1            |

|              |
|--------------|
| 0.5588235294 |
| 0.5588235294 |
| 1            |
| 0.6256684492 |
| 0.5588235294 |
| 1            |
| 0.5          |
| 0.5          |
| 0.5588235294 |
| 0.2869875223 |
| 0.1379790553 |
| 1            |
| 1            |
| 1            |
| 1            |
| 1            |
| 1            |
| 1            |
| 1            |
| 1            |
| 0.5588235294 |
| 1            |
| 1            |
| 1            |
| 1            |
| 1            |
| 1            |
| 1            |
| 0.4166666667 |
| 1            |
| 1            |
| 1            |
| 1            |
| 1            |
| 1            |
| 1            |
| 0.6256684492 |
| 0.6256684492 |
| 0.5588235294 |
| 0.5588235294 |
| 0.5588235294 |
| 0.5588235294 |
| 0.5588235294 |
| 0.5588235294 |
| 0.3666803232 |
| 0.4166666667 |
| 0.4166666667 |
| 1            |
| 1            |
| 1            |
| 0.5588235294 |
| 0.6256684492 |

|              |
|--------------|
| 0.6295677362 |
| 0.6295677362 |
| 0.6295677362 |
| 0.6295677362 |
| 0.5588235294 |
| 0.6773654476 |
| 0.6773654476 |
| 0.4166666667 |
| 0.6256684492 |
| 0.5588235294 |
| 0.6773654476 |
| 1            |
| 1            |
| 0.5588235294 |
| 0.6773654476 |
| 0.6773654476 |
| 1            |
| 0.4166666667 |
| 1            |
| 1            |
| 1            |
| 0.5588235294 |
| 1            |
| 1            |
| 1            |
| 0.5588235294 |
| 1            |
| 0.1666666667 |
| 0.1666666667 |
| 1            |
| 1            |
| 1            |
| 1            |
| 1            |
| 1            |
| 0.5588235294 |
| 0.1666666667 |
| 0.1666666667 |
| 0.5588235294 |
| 0.4166666667 |
| 0.6256684492 |
| 1            |
| 0.25         |
| 0.0637254902 |
| 0.5588235294 |
| 0.5588235294 |
| 0.6773654476 |
| 0.6295677362 |
| 1            |
| 0.4166666667 |

|              |
|--------------|
| 0.6295677362 |
| 1            |
| 0.5588235294 |
| 0.376114082  |
| 1            |
| 1            |
| 0.4166666667 |
| 0.4166666667 |
| 0.4166666667 |
| 0.4166666667 |
| 1            |
| 1            |
| 0.376114082  |
| 1            |
| 1            |
| 1            |
| 1            |
| 0.1666666667 |
| 1            |
| 1            |
| 1            |
| 1            |
| 0.5588235294 |
| 0.1379790553 |
| 1            |
| 0.5          |
| 0.4166666667 |
| 0.2869875223 |
| 1            |
| 0.6256684492 |
| 0.6773654476 |
| 1            |
| 1            |
| 0.4166666667 |
| 0.4166666667 |
| 0.6256684492 |
| 1            |
| 1            |
| 1            |
| 1            |
| 1            |
| 1            |
| 0.4166666667 |
| 0.209972112  |
| 0.1379790553 |
| 1            |
| 1            |
| 0.4166666667 |
| 0.4166666667 |
| 1            |
| 1            |



|              |
|--------------|
| 1            |
| 1            |
| 1            |
| 1            |
| 0.5588235294 |
| 0.1666666667 |
| 1            |
| 1            |
| 1            |
| 0.4166666667 |
| 0.4166666667 |
| 0.5          |
| 1            |
| 0.1379790553 |
| 0.6256684492 |
| 1            |
| 0.6256684492 |
| 1            |
| 1            |
| 1            |
| 1            |
| 1            |
| 1            |
| 0.4166666667 |
| 0.6256684492 |
| 0.25         |
| 1            |
| 0.5          |
| 1            |
| 0.4166666667 |
| 0.25         |
| 0.5          |
| 1            |
| 1            |
| 1            |
| 1            |
| 1            |
| 0.1666666667 |
| 0.2869875223 |
| 0.2869875223 |
| 0.4166666667 |
| 0.4166666667 |
| 1            |
| 1            |
| 1            |
| 0.25         |
| 0.4166666667 |
| 0.4166666667 |
| 1            |
| 0.4178238744 |
| 1            |

|              |
|--------------|
| 0.5          |
| 1            |
| 0.5588235294 |
| 1            |
| 0.5          |
| 0.4240540589 |
| 0.25         |
| 1            |
| 0.4166666667 |
| 0.376114082  |
| 0.4166666667 |
| 0.4166666667 |
| 1            |
| 0.1379790553 |
| 1            |
| 0.4166666667 |
| 0.4166666667 |
| 0.1666666667 |
| 0.1666666667 |
| 0.4166666667 |
| 0.4166666667 |
| 1            |
| 1            |
| 1            |
| 1            |
| 1            |
| 0.25         |
| 0.25         |
| 1            |
| 1            |
| 0.4166666667 |
| 1            |
| 1            |
| 0.2869875223 |
| 1            |
| 0.2869875223 |
| 1            |
| 0.6295677362 |
| 0.25         |
| 1            |
| 1            |
| 1            |
| 0.4166666667 |
| 0.4166666667 |
| 0.6256684492 |
| 0.5588235294 |
| 1            |
| 1            |
| 0.1379790553 |
| 0.4166666667 |
| 0.1666666667 |





|              |
|--------------|
| 0.416666667  |
| 0.416666667  |
| 0.416666667  |
| 0.416666667  |
| 0.6256684492 |
| 0.6256684492 |
| 0.6256684492 |
| 0.6256684492 |
| 0.5588235294 |
| 1            |
| 0.6256684492 |
| 0.6256684492 |
| 0.6256684492 |
| 0.6256684492 |
| 0.6256684492 |
| 0.6256684492 |
| 1            |
| 1            |
| 0.6256684492 |
| 0.6256684492 |
| 0.25         |
| 0.25         |
| 0.25         |
| 0.5588235294 |
| 1            |
| 1            |
| 0.416666667  |
| 0.6256684492 |
| 0.1247771836 |
| 0.416666667  |
| 1            |
| 0.1247771836 |
| 1            |
| 1            |
| 1            |
| 1            |
| 1            |
| 1            |
| 1            |
| 1            |
| 1            |
| 1            |
| 1            |
| 1            |
| 1            |
| 1            |
| 1            |
| 1            |
| 1            |
| 1            |
| 0.2869875223 |
| 0.5          |
| 1            |

|              |
|--------------|
| 1            |
| 0.6256684492 |
| 0.6256684492 |
| 1            |
| 1            |
| 0.5588235294 |
| 1            |
| 0.6256684492 |
| 1            |
| 1            |
| 1            |
| 1            |
| 1            |
| 1            |
| 0.4166666667 |
| 1            |
| 1            |
| 0.5588235294 |
| 1            |
| 1            |
| 1            |
| 1            |
| 0.5588235294 |
| 0.5588235294 |
| 1            |
| 0.4166666667 |
| 0.0637254902 |
| 0.4166666667 |
| 0.4166666667 |
| 0.1666666667 |
| 1            |
| 1            |
| 0.3666803232 |
| 0.3666803232 |
| 0.5588235294 |
| 0.5588235294 |
| 0.6773654476 |
| 0.6773654476 |
| 1            |
| 0.4166666667 |
| 1            |
| 1            |
| 1            |
| 0.6256684492 |
| 0.1379790553 |
| 0.1666666667 |
| 0.6256684492 |
| 1            |
| 0.5588235294 |
| 0.5588235294 |
| 0.5588235294 |



|              |
|--------------|
| 0.25         |
| 0.25         |
| 0.25         |
| 0.25         |
| 0.25         |
| 0.25         |
| 0.25         |
| 1            |
| 1            |
| 1            |
| 1            |
| 1            |
| 1            |
| 1            |
| 1            |
| 1            |
| 1            |
| 1            |
| 1            |
| 1            |
| 0.166666667  |
| 0.166666667  |
| 0.166666667  |
| 0.166666667  |
| 0.166666667  |
| 0.166666667  |
| 1            |
| 1            |
| 0.5588235294 |
| 0.5588235294 |
| 0.416666667  |
| 1            |
| 0.5588235294 |
| 1            |
| 0.416666667  |
| 0.416666667  |
| 0.416666667  |
| 1            |
| 1            |
| 1            |
| 0.25         |
| 1            |
| 1            |
| 0.6256684492 |
| 0.416666667  |
| 0.25         |
| 1            |
| 0.5588235294 |
| 1            |
| 1            |
| 1            |

|              |
|--------------|
| 0.416666667  |
| 0.2869875223 |
| 1            |
| 1            |
| 1            |
| 0.5          |
| 0.416666667  |
| 0.4178238744 |
| 1            |
| 0.416666667  |
| 0.1247771836 |
| 0.416666667  |
| 0.416666667  |
| 1            |
| 1            |
| 1            |
| 0.5588235294 |
| 1            |
| 1            |
| 0.209972112  |
| 0.416666667  |
| 1            |
| 1            |
| 0.5588235294 |
| 0.25         |
| 0.25         |
| 0.6256684492 |
| 0.6256684492 |
| 0.416666667  |
| 0.416666667  |
| 1            |
| 1            |
| 1            |
| 1            |
| 1            |
| 0.6256684492 |
| 0.25         |
| 1            |
| 1            |
| 1            |
| 1            |
| 1            |
| 1            |
| 1            |
| 1            |
| 1            |
| 1            |
| 0.2869875223 |
| 0.2869875223 |
| 0.6256684492 |
| 0.5          |
| 1            |

|              |
|--------------|
| 1            |
| 1            |
| 1            |
| 1            |
| 1            |
| 0.061942959  |
| 0.5588235294 |
| 1            |
| 1            |
| 1            |
| 1            |
| 0.5          |
| 1            |
| 0.416666667  |
| 1            |
| 0.25         |
| 0.25         |
| 1            |
| 1            |
| 1            |
| 1            |
| 1            |
| 0.5588235294 |
| 0.416666667  |
| 1            |
| 1            |
| 1            |
| 0.6256684492 |
| 0.416666667  |
| 0.416666667  |
| 0.416666667  |
| 0.5588235294 |
| 1            |
| 1            |
| 1            |
| 1            |
| 0.5588235294 |
| 1            |
| 0.416666667  |
| 0.6256684492 |
| 0.6256684492 |
| 0.6256684492 |
| 0.6256684492 |
| 0.6256684492 |
| 0.6256684492 |
| 0.6256684492 |
| 0.5588235294 |
| 1            |
| 1            |
| 0.376114082  |
| 0.416666667  |
| 1            |

|              |
|--------------|
| 1            |
| 1            |
| 0.5588235294 |
| 0.1379790553 |
| 0.1666666667 |
| 0.5          |
| 0.5          |
| 0.5          |
| 1            |
| 1            |
| 1            |
| 1            |
| 1            |
| 0.4166666667 |
| 1            |
| 1            |
| 0.6256684492 |
| 0.209972112  |
| 0.25         |
| 0.25         |
| 0.4166666667 |
| 0.2869875223 |
| 1            |
| 1            |
| 1            |
| 0.1666666667 |
| 1            |
| 1            |
| 0.4166666667 |
| 0.4166666667 |
| 0.5588235294 |
| 1            |
| 0.4166666667 |
| 0.4166666667 |
| 0.5588235294 |
| 1            |
| 0.4166666667 |
| 0.4166666667 |
| 1            |
| 1            |
| 1            |
| 0.376114082  |
| 0.5588235294 |
| 0.5588235294 |
| 0.5588235294 |
| 0.4166666667 |
| 1            |
| 1            |
| 1            |
| 1            |
| 1            |







|              |
|--------------|
| 0.25         |
| 0.416666667  |
| 1            |
| 1            |
| 0.6295677362 |
| 0.25         |
| 0.209972112  |
| 0.416666667  |
| 0.5          |
| 1            |
| 0.3666803232 |
| 0.25         |
| 0.5588235294 |
| 0.5588235294 |
| 1            |
| 1            |
| 0.6256684492 |
| 0.6256684492 |
| 1            |
| 1            |
| 1            |
| 1            |
| 0.416666667  |
| 1            |
| 1            |
| 1            |
| 0.25         |
| 1            |
| 1            |
| 1            |
| 1            |
| 0.5          |
| 1            |
| 0.5          |
| 0.166666667  |
| 0.416666667  |
| 0.416666667  |
| 0.25         |
| 0.416666667  |
| 0.416666667  |
| 0.416666667  |
| 0.416666667  |
| 0.416666667  |
| 0.416666667  |
| 1            |
| 0.416666667  |
| 0.416666667  |
| 0.416666667  |
| 0.416666667  |
| 0.25         |
| 0.376114082  |
| 0.416666667  |

|              |
|--------------|
| 0.416666667  |
| 1            |
| 1            |
| 1            |
| 0.5588235294 |
| 0.6256684492 |
| 1            |
| 0.25         |
| 0.416666667  |
| 1            |
| 1            |
| 1            |
| 1            |
| 0.166666667  |
| 1            |
| 0.5588235294 |
| 1            |
| 0.5588235294 |
| 1            |
| 0.6256684492 |
| 0.416666667  |
| 0.416666667  |
| 0.416666667  |
| 0.416666667  |
| 0.416666667  |
| 1            |
| 1            |
| 1            |
| 1            |
| 1            |
| 0.2869875223 |
| 0.376114082  |
| 0.376114082  |
| 1            |
| 1            |
| 1            |
| 1            |
| 1            |
| 0.25         |
| 0.376114082  |
| 1            |
| 1            |
| 1            |
| 0.416666667  |
| 1            |
| 1            |
| 1            |
| 0.416666667  |
| 1            |
| 0.416666667  |
| 1            |

|              |
|--------------|
| 1            |
| 1            |
| 1            |
| 1            |
| 1            |
| 0.5          |
| 1            |
| 0.6256684492 |
| 1            |
| 0.25         |
| 0.1666666667 |
| 0.4166666667 |
| 1            |
| 0.5588235294 |
| 0.4166666667 |
| 0.4166666667 |
| 0.209972112  |
| 0.209972112  |
| 0.4166666667 |
| 1            |
| 0.5          |
| 1            |
| 1            |
| 0.5588235294 |
| 0.5588235294 |
| 0.4166666667 |
| 0.4166666667 |
| 0.5          |
| 0.4166666667 |
| 1            |
| 0.4166666667 |
| 0.4166666667 |
| 0.4166666667 |
| 0.061942959  |
| 1            |
| 0.4166666667 |
| 0.6256684492 |
| 0.061942959  |
| 0.5588235294 |
| 0.1666666667 |
| 1            |
| 1            |
| 0.6256684492 |
| 0.4166666667 |
| 1            |
| 1            |
| 1            |
| 1            |
| 0.376114082  |
| 0.5          |
| 0.6256684492 |

|              |
|--------------|
| 0.6256684492 |
| 1            |
| 1            |
| 0.3666803232 |
| 0.4166666667 |
| 0.2869875223 |
| 1            |
| 0.1666666667 |
| 0.4166666667 |
| 1            |
| 1            |
| 0.5          |
| 0.376114082  |
| 0.5588235294 |
| 0.5588235294 |
| 0.25         |
| 1            |
| 0.5588235294 |
| 0.4166666667 |
| 1            |
| 0.5          |
| 0.5          |
| 1            |
| 1            |
| 1            |
| 1            |
| 1            |
| 0.5          |
| 1            |
| 1            |
| 0.25         |
| 0.25         |
| 1            |
| 1            |
| 0.4166666667 |
| 1            |
| 1            |
| 0.5588235294 |
| 0.4166666667 |
| 0.2869875223 |
| 1            |
| 1            |
| 1            |
| 1            |
| 1            |
| 1            |
| 1            |
| 0.6256684492 |
| 1            |
| 1            |
| 0.6256684492 |

|              |
|--------------|
| 0.6256684492 |
| 0.6256684492 |
| 1            |
| 0.4166666667 |
| 1            |
| 1            |
| 1            |
| 1            |
| 1            |
| 0.5588235294 |
| 1            |
| 1            |
| 0.5          |
| 1            |
| 1            |
| 1            |
| 1            |
| 0.4166666667 |
| 1            |
| 1            |
| 1            |
| 1            |
| 0.25         |
| 1            |
| 1            |
| 1            |
| 1            |
| 0.4166666667 |
| 0.1666666667 |
| 0.1666666667 |
| 1            |
| 0.1666666667 |
| 1            |
| 1            |
| 0.4166666667 |
| 1            |
| 0.1666666667 |
| 1            |
| 1            |
| 1            |
| 1            |
| 1            |
| 1            |
| 1            |
| 1            |
| 1            |
| 1            |
| 1            |
| 0.0637254902 |
| 0.0637254902 |
| 1            |

|              |
|--------------|
| 1            |
| 1            |
| 1            |
| 1            |
| 1            |
| 0.2869875223 |
| 0.2869875223 |
| 1            |
| 0.6256684492 |
| 1            |
| 1            |
| 0.5          |
| 0.5          |
| 0.4166666667 |
| 1            |
| 0.1666666667 |
| 0.1666666667 |
| 1            |
| 1            |
| 1            |
| 1            |
| 1            |
| 0.1666666667 |
| 1            |
| 1            |
| 0.4166666667 |
| 1            |
| 0.209972112  |
| 0.4166666667 |
| 0.5588235294 |
| 0.5588235294 |
| 0.25         |
| 1            |
| 1            |
| 1            |
| 0.4166666667 |
| 1            |
| 0.1379790553 |
| 1            |
| 1            |
| 1            |
| 1            |
| 1            |
| 1            |
| 1            |
| 0.25         |
| 0.25         |
| 0.4166666667 |
| 0.376114082  |
| 0.25         |
| 0.25         |



|              |
|--------------|
| 1            |
| 1            |
| 1            |
| 1            |
| 1            |
| 1            |
| 0.416666667  |
| 0.6256684492 |
| 0.6256684492 |
| 0.166666667  |
| 1            |
| 0.5588235294 |
| 0.1247771836 |
| 0.6256684492 |
| 0.416666667  |
| 1            |
| 1            |
| 1            |
| 1            |
| 0.416666667  |
| 1            |
| 1            |
| 0.5          |
| 1            |
| 1            |
| 1            |
| 0.061942959  |
| 0.5588235294 |
| 0.1379790553 |
| 0.1379790553 |
| 0.209972112  |
| 1            |
| 1            |
| 1            |
| 0.25         |
| 1            |
| 0.1379790553 |
| 1            |
| 0.5588235294 |
| 1            |
| 1            |
| 0.6773654476 |
| 1            |
| 1            |
| 0.209972112  |
| 0.2869875223 |
| 1            |
| 0.376114082  |
| 1            |
| 1            |
| 1            |

|              |
|--------------|
| 0.5          |
| 1            |
| 1            |
| 1            |
| 0.6256684492 |
| 1            |
| 0.25         |
| 0.25         |
| 0.4166666667 |
| 1            |
| 0.1666666667 |
| 1            |
| 0.376114082  |
| 1            |
| 1            |
| 0.6295677362 |
| 0.376114082  |
| 0.5          |
| 1            |
| 1            |
| 1            |
| 1            |
| 0.25         |
| 0.5588235294 |
| 0.5588235294 |
| 1            |
| 1            |
| 1            |
| 1            |
| 0.2869875223 |
| 0.4166666667 |
| 1            |
| 1            |
| 1            |
| 0.1379790553 |
| 0.4166666667 |
| 0.5588235294 |
| 1            |
| 1            |
| 1            |
| 0.5588235294 |
| 0.5588235294 |
| 1            |
| 0.6256684492 |
| 0.6256684492 |
| 0.6256684492 |
| 0.4166666667 |
| 0.4166666667 |
| 0.6295677362 |
| 1            |
| 0.5588235294 |

|              |
|--------------|
| 1            |
| 1            |
| 1            |
| 1            |
| 1            |
| 1            |
| 0.2869875223 |
| 0.5588235294 |
| 0.5588235294 |
| 0.4166666667 |
| 0.4166666667 |
| 0.6295677362 |
| 1            |
| 0.4166666667 |
| 1            |
| 0.25         |
| 0.25         |
| 1            |
| 1            |
| 1            |
| 1            |
| 0.4166666667 |
| 1            |
| 0.4166666667 |
| 0.25         |
| 0.25         |
| 0.1666666667 |
| 0.25         |
| 1            |
| 0.4166666667 |
| 1            |
| 0.5588235294 |
| 1            |
| 1            |
| 1            |
| 1            |
| 0.4166666667 |
| 0.5588235294 |
| 0.5588235294 |
| 1            |
| 0.25         |
| 0.25         |
| 0.4166666667 |
| 0.6773654476 |
| 0.6773654476 |
| 1            |
| 1            |
| 0.061942959  |
| 0.25         |
| 1            |
| 1            |

|              |
|--------------|
| 0.5588235294 |
| 1            |
| 1            |
| 1            |
| 1            |
| 0.4166666667 |
| 0.376114082  |
| 0.376114082  |
| 0.376114082  |
| 1            |
| 1            |
| 1            |
| 1            |
| 1            |
| 1            |
| 1            |
| 1            |
| 1            |
| 0.4178238744 |
| 0.5588235294 |
| 1            |
| 1            |
| 0.6773654476 |
| 1            |
| 0.4166666667 |
| 1            |
| 0.25         |
| 0.5588235294 |
| 1            |
| 1            |
| 1            |
| 1            |
| 0.4166666667 |
| 0.4166666667 |
| 0.4166666667 |
| 1            |
| 1            |
| 0.1666666667 |
| 0.4166666667 |
| 0.6256684492 |
| 1            |
| 1            |
| 0.25         |
| 0.5588235294 |
| 1            |
| 0.5588235294 |
| 1            |
| 0.5588235294 |
| 1            |
| 0.5588235294 |
| 0.5588235294 |

|              |
|--------------|
| 0.5588235294 |
| 0.5588235294 |
| 0.4166666667 |
| 1            |
| 1            |
| 1            |
| 0.6256684492 |
| 1            |
| 0.5588235294 |
| 0.25         |
| 0.4166666667 |
| 1            |
| 1            |
| 1            |
| 0.376114082  |
| 0.5          |
| 1            |
| 1            |
| 1            |
| 1            |
| 1            |
| 1            |
| 1            |
| 0.5588235294 |
| 0.1379790553 |
| 0.6256684492 |
| 0.25         |
| 0.1379790553 |
| 1            |
| 0.4166666667 |
| 1            |
| 1            |
| 0.5          |
| 1            |
| 1            |
| 1            |
| 0.4166666667 |
| 1            |
| 1            |
| 0.1379790553 |
| 0.6256684492 |
| 0.1666666667 |
| 1            |
| 0.4166666667 |
| 0.5588235294 |
| 1            |
| 0.376114082  |
| 0.4166666667 |
| 1            |
| 1            |
| 1            |

|              |
|--------------|
| 1            |
| 1            |
| 0.5588235294 |
| 1            |
| 1            |
| 0.25         |
| 0.25         |
| 0.5588235294 |
| 1            |
| 0.6773654476 |
| 1            |
| 1            |
| 1            |
| 0.4166666667 |
| 0.5588235294 |
| 1            |
| 0.4166666667 |
| 1            |
| 1            |
| 0.5588235294 |
| 0.25         |
| 1            |
| 0.5588235294 |
| 0.25         |
| 1            |
| 0.4166666667 |
| 0.1666666667 |
| 0.376114082  |
| 0.1666666667 |
| 1            |
| 1            |
| 1            |
| 0.25         |
| 1            |
| 1            |
| 1            |
| 0.6256684492 |
| 0.6256684492 |
| 0.4166666667 |
| 1            |
| 0.5          |
| 1            |
| 1            |
| 1            |
| 0.4166666667 |
| 0.6256684492 |
| 0.209972112  |
| 0.4166666667 |
| 1            |
| 1            |
| 0.5          |

|              |
|--------------|
| 0.5          |
| 0.6256684492 |
| 1            |
| 0.2869875223 |
| 1            |
| 1            |
| 1            |
| 1            |
| 1            |
| 1            |
| 1            |
| 1            |
| 1            |
| 1            |
| 0.6256684492 |
| 0.6256684492 |
| 1            |
| 0.061942959  |
| 1            |
| 0.376114082  |
| 1            |
| 0.376114082  |
| 0.376114082  |
| 0.376114082  |
| 1            |
| 1            |
| 1            |
| 1            |
| 0.4166666667 |
| 1            |
| 1            |
| 1            |
| 1            |
| 1            |
| 1            |
| 1            |
| 1            |
| 1            |
| 0.2869875223 |
| 0.4166666667 |
| 0.4166666667 |
| 1            |
| 1            |
| 1            |
| 1            |
| 1            |
| 1            |
| 0.1666666667 |
| 0.1247771836 |
| 0.5          |
| 0.25         |

|              |
|--------------|
| 0.5          |
| 0.5          |
| 0.25         |
| 0.5          |
| 0.166666667  |
| 0.5          |
| 0.166666667  |
| 0.25         |
| 0.416666667  |
| 1            |
| 0.416666667  |
| 0.376114082  |
| 1            |
| 1            |
| 1            |
| 0.416666667  |
| 1            |
| 0.416666667  |
| 1            |
| 1            |
| 1            |
| 1            |
| 1            |
| 0.416666667  |
| 1            |
| 0.376114082  |
| 0.376114082  |
| 0.376114082  |
| 0.2869875223 |
| 0.2869875223 |
| 0.416666667  |
| 1            |
| 1            |
| 1            |
| 1            |
| 1            |
| 1            |
| 1            |
| 1            |
| 1            |
| 1            |
| 1            |
| 1            |
| 1            |
| 1            |
| 1            |
| 1            |
| 1            |
| 1            |
| 0.416666667  |
| 1            |
| 0.6773654476 |
| 0.5588235294 |







|              |
|--------------|
| 1            |
| 1            |
| 1            |
| 1            |
| 1            |
| 1            |
| 1            |
| 0.5          |
| 0.5          |
| 0.5          |
| 0.5          |
| 0.5          |
| 0.5588235294 |
| 0.5588235294 |
| 0.5588235294 |
| 0.5588235294 |
| 0.5588235294 |
| 0.5588235294 |
| 0.5588235294 |
| 0.5588235294 |
| 0.5588235294 |
| 0.5588235294 |
| 0.5588235294 |
| 0.5588235294 |
| 0.5588235294 |
| 0.5588235294 |
| 1            |
| 0.5588235294 |
| 0.5588235294 |
| 0.5588235294 |
| 0.5588235294 |
| 1            |
| 1            |
| 1            |
| 1            |
| 1            |
| 0.5          |
| 0.5          |
| 1            |
| 1            |
| 1            |
| 1            |
| 1            |
| 1            |
| 1            |
| 1            |
| 0.5          |
| 0.5          |
| 0.5          |
| 0.5          |
| 1            |
| 1            |
| 1            |

|             |
|-------------|
| 1           |
| 1           |
| 1           |
| 1           |
| 1           |
| 1           |
| 1           |
| 1           |
| 1           |
| 1           |
| 1           |
| 1           |
| 0.5         |
| 0.5         |
| 0.5         |
| 0.5         |
| 0.5         |
| 0.5         |
| 0.5         |
| 0.5         |
| 0.5         |
| 0.5         |
| 0.5         |
| 0.5         |
| 0.5         |
| 0.5         |
| 0.5         |
| 0.5         |
| 0.5         |
| 0.5         |
| 1           |
| 1           |
| 1           |
| 1           |
| 1           |
| 1           |
| 1           |
| 1           |
| 1           |
| 1           |
| 1           |
| 1           |
| 1           |
| 0.5         |
| 0.5         |
| 0.5         |
| 0.5         |
| 0.5         |
| 0.5         |
| 0.5         |
| 0.5         |
| 0.5         |
| 1           |
| 1           |
| 1           |
| 0.416666667 |
| 1           |

|              |
|--------------|
| 1            |
| 1            |
| 1            |
| 0.6256684492 |
| 1            |
| 1            |
| 0.4166666667 |
| 1            |
| 1            |
| 1            |
| 0.1666666667 |
| 0.5          |
| 0.5          |
| 1            |
| 1            |
| 1            |
| 0.5588235294 |
| 0.25         |
| 0.5588235294 |
| 1            |
| 1            |
| 1            |
| 0.5          |
| 1            |
| 0.4178238744 |
| 0.4178238744 |
| 1            |
| 0.5          |
| 0.5          |
| 0.25         |
| 1            |
| 0.25         |
| 0.25         |
| 0.25         |
| 1            |
| 0.376114082  |
| 1            |
| 1            |
| 1            |
| 0.4166666667 |
| 1            |
| 1            |
| 1            |
| 0.4166666667 |
| 0.4166666667 |
| 0.7210233593 |
| 1            |
| 0.4166666667 |
| 1            |
| 0.5588235294 |
| 0.2869875223 |

|              |
|--------------|
| 0.2869875223 |
| 0.4166666667 |
| 0.4166666667 |
| 1            |
| 0.5588235294 |
| 1            |
| 0.4166666667 |
| 0.5          |
| 1            |
| 1            |
| 1            |
| 1            |
| 0.061942959  |
| 0.4166666667 |
| 0.6773654476 |
| 0.6256684492 |
| 0.25         |
| 0.25         |
| 0.4166666667 |
| 0.4166666667 |
| 1            |
| 0.6256684492 |
| 0.1247771836 |
| 0.1247771836 |
| 0.1247771836 |
| 0.1247771836 |
| 0.1247771836 |
| 0.1247771836 |
| 0.1247771836 |
| 0.1247771836 |
| 0.1247771836 |
| 0.1247771836 |
| 0.1247771836 |
| 0.1247771836 |
| 0.1247771836 |
| 0.1247771836 |
| 0.1247771836 |
| 0.1247771836 |
| 0.1247771836 |
| 0.1247771836 |
| 0.1247771836 |
| 0.1247771836 |
| 0.1247771836 |
| 0.1247771836 |
| 0.1247771836 |
| 0.5588235294 |
| 0.4166666667 |
| 1            |
| 1            |
| 1            |
| 1            |
| 0.6256684492 |
| 0.6256684492 |
| 0.6256684492 |
| 1            |
| 0.6256684492 |

|              |
|--------------|
| 0.6256684492 |
| 0.6256684492 |
| 0.25         |
| 1            |
| 0.4166666667 |
| 1            |
| 1            |
| 0.4166666667 |
| 0.6256684492 |
| 1            |
| 0.6256684492 |
| 1            |
| 1            |
| 1            |
| 1            |
| 1            |
| 0.5588235294 |
| 1            |
| 1            |
| 0.5588235294 |
| 1            |
| 1            |
| 0.4166666667 |
| 0.4166666667 |
| 0.6256684492 |
| 0.6256684492 |
| 0.6256684492 |
| 0.1247771836 |
| 0.1247771836 |
| 0.1247771836 |
| 1            |
| 1            |
| 1            |
| 1            |
| 1            |
| 1            |
| 1            |
| 1            |
| 1            |
| 1            |
| 1            |
| 0.5588235294 |
| 1            |
| 1            |
| 1            |
| 1            |
| 1            |
| 0.2869875223 |
| 0.1666666667 |
| 1            |
| 1            |





|              |
|--------------|
| 1            |
| 1            |
| 1            |
| 1            |
| 1            |
| 1            |
| 1            |
| 1            |
| 1            |
| 1            |
| 0.4178238744 |
| 1            |
| 0.5588235294 |
| 0.4166666667 |
| 0.4166666667 |
| 0.4166666667 |
| 0.4166666667 |
| 0.4166666667 |
| 0.4166666667 |
| 0.4166666667 |
| 0.5588235294 |
| 1            |
| 0.5          |
| 0.4166666667 |
| 1            |
| 1            |
| 0.1247771836 |
| 1            |
| 0.5          |
| 1            |
| 0.4178238744 |
| 1            |
| 0.2869875223 |
| 1            |
| 1            |
| 0.5588235294 |
| 0.5588235294 |
| 0.5588235294 |
| 0.5588235294 |
| 0.1666666667 |
| 0.5588235294 |
| 0.5588235294 |
| 0.2869875223 |
| 0.5588235294 |
| 0.5588235294 |
| 0.4166666667 |
| 0.5588235294 |
| 1            |
| 0.5588235294 |
| 0.5588235294 |
| 0.5588235294 |
| 0.0637254902 |
| 1            |

|              |
|--------------|
| 0.25         |
| 0.416666667  |
| 1            |
| 1            |
| 1            |
| 1            |
| 0.0637254902 |
| 0.1379790553 |
| 0.376114082  |
| 0.6256684492 |
| 0.6773654476 |
| 0.209972112  |
| 0.061942959  |
| 0.376114082  |
| 0.1379790553 |
| 0.4178238744 |
| 0.416666667  |
| 0.416666667  |
| 0.6295677362 |
| 1            |
| 0.416666667  |
| 0.416666667  |
| 0.1247771836 |
| 0.061942959  |
| 0.5          |
| 1            |
| 1            |
| 0.5588235294 |
| 0.416666667  |
| 0.5588235294 |
| 1            |
| 1            |
| 0.2869875223 |
| 0.5588235294 |
| 0.5588235294 |
| 0.5588235294 |
| 0.2869875223 |
| 0.2869875223 |
| 0.2869875223 |
| 0.5588235294 |
| 1            |
| 0.5588235294 |
| 1            |
| 0.416666667  |
| 0.5588235294 |
| 0.166666667  |
| 1            |
| 1            |
| 1            |
| 1            |
| 1            |

|              |
|--------------|
| 1            |
| 1            |
| 1            |
| 0.25         |
| 1            |
| 0.5          |
| 0.416666667  |
| 1            |
| 1            |
| 1            |
| 1            |
| 0.5588235294 |
| 1            |
| 1            |
| 0.5588235294 |
| 0.416666667  |
| 1            |
| 0.6773654476 |
| 1            |
| 1            |
| 0.6773654476 |
| 0.416666667  |
| 1            |
| 1            |
| 1            |
| 1            |
| 1            |
| 1            |
| 1            |
| 1            |
| 0.5588235294 |
| 0.5588235294 |
| 1            |
| 1            |
| 0.1379790553 |
| 0.5          |
| 1            |
| 1            |
| 1            |
| 1            |
| 0.209972112  |
| 0.25         |
| 0.416666667  |
| 0.416666667  |
| 0.416666667  |
| 1            |
| 0.25         |
| 1            |
| 1            |
| 1            |
| 0.5588235294 |



|              |
|--------------|
| 1            |
| 0.6256684492 |
| 1            |
| 1            |
| 1            |
| 1            |
| 1            |
| 1            |
| 0.5588235294 |
| 0.0637254902 |
| 0.2869875223 |
| 0.2869875223 |
| 0.2869875223 |
| 1            |
| 1            |
| 1            |
| 1            |
| 1            |
| 1            |
| 1            |
| 1            |
| 0.209972112  |
| 0.6256684492 |
| 0.6256684492 |
| 0.6256684492 |
| 0.6256684492 |
| 1            |
| 0.5588235294 |
| 1            |
| 0.376114082  |
| 0.5          |
| 1            |
| 0.6256684492 |
| 0.25         |
| 0.25         |
| 1            |
| 0.25         |
| 1            |
| 1            |
| 0.25         |
| 0.061942959  |
| 1            |
| 0.6256684492 |
| 1            |
| 1            |
| 1            |
| 1            |
| 0.6256684492 |
| 0.6256684492 |
| 1            |
| 1            |

|              |
|--------------|
| 0.6256684492 |
| 0.6256684492 |
| 1            |
| 0.376114082  |
| 1            |
| 1            |
| 0.2869875223 |
| 0.1666666667 |
| 1            |
| 1            |
| 1            |
| 1            |
| 0.2869875223 |
| 1            |
| 1            |
| 1            |
| 1            |
| 1            |
| 1            |
| 0.5588235294 |
| 1            |
| 1            |
| 1            |
| 1            |
| 1            |
| 1            |
| 1            |
| 0.4166666667 |
| 0.5588235294 |
| 1            |
| 1            |
| 0.2869875223 |
| 1            |
| 0.5588235294 |
| 1            |
| 1            |
| 0.5588235294 |
| 1            |
| 0.4166666667 |
| 0.4166666667 |
| 1            |
| 0.2869875223 |
| 1            |
| 1            |
| 1            |
| 0.209972112  |
| 0.6773654476 |
| 1            |
| 0.25         |
| 1            |

|              |
|--------------|
| 1            |
| 0.5          |
| 1            |
| 1            |
| 0.5588235294 |
| 1            |
| 1            |
| 1            |
| 1            |
| 1            |
| 1            |
| 0.2869875223 |
| 1            |
| 1            |
| 1            |
| 1            |
| 1            |
| 1            |
| 1            |
| 0.6256684492 |
| 1            |
| 0.376114082  |
| 1            |
| 0.1666666667 |
| 0.4166666667 |
| 0.1666666667 |
| 0.1666666667 |
| 0.6256684492 |
| 1            |
| 1            |
| 1            |
| 1            |
| 0.25         |
| 0.25         |
| 1            |
| 0.25         |
| 0.25         |
| 1            |
| 0.4178238744 |
| 0.4166666667 |
| 0.4166666667 |
| 0.6256684492 |
| 1            |
| 1            |
| 1            |
| 1            |
| 0.4166666667 |
| 1            |
| 0.5588235294 |
| 0.4166666667 |
| 0.4166666667 |
| 0.4166666667 |

|               |
|---------------|
| 1             |
| 0.416666667   |
| 1             |
| 1             |
| 0.416666667   |
| 0.416666667   |
| 0.6256684492  |
| 0.416666667   |
| 0.416666667   |
| 0.416666667   |
| 0.416666667   |
| 0.416666667   |
| 0.416666667   |
| 1             |
| 0.416666667   |
| 0.416666667   |
| 0.166666667   |
| 0.166666667   |
| 0.416666667   |
| 0.416666667   |
| 0.416666667   |
| 0.416666667   |
| 1             |
| 0.416666667   |
| 0.416666667   |
| 0.416666667   |
| 0.416666667   |
| 0.166666667   |
| 1             |
| 0.25          |
| 1             |
| 1             |
| 0.25          |
| 1             |
| 1             |
| 0.25          |
| 1             |
| 0.5588235294  |
| 0.6256684492  |
| 0.416666667   |
| 1             |
| 0.6256684492  |
| 1             |
| 1             |
| 1             |
| 1             |
| 0.416666667   |
| 1             |
| 0.2869875223  |
| 0.03042881375 |
| 0.03042881375 |



|              |
|--------------|
| 0.1247771836 |
| 0.1247771836 |
| 0.1247771836 |
| 1            |
| 1            |
| 0.4166666667 |
| 0.2869875223 |
| 1            |
| 0.1666666667 |
| 0.5          |
| 1            |
| 1            |
| 1            |
| 1            |
| 0.4166666667 |
| 0.6256684492 |
| 0.4166666667 |
| 0.6256684492 |
| 0.4240540589 |
| 1            |
| 1            |
| 1            |
| 1            |
| 0.6256684492 |
| 0.6256684492 |
| 0.376114082  |
| 0.376114082  |
| 0.6256684492 |
| 1            |
| 1            |
| 1            |
| 0.4166666667 |
| 1            |
| 1            |
| 1            |
| 0.5          |
| 0.5588235294 |
| 0.5588235294 |
| 0.5          |
| 0.5          |
| 1            |
| 1            |
| 0.5          |
| 0.4166666667 |
| 1            |
| 0.4166666667 |
| 0.4166666667 |
| 1            |
| 1            |
| 1            |
| 1            |

|              |
|--------------|
| 0.416666667  |
| 0.416666667  |
| 0.416666667  |
| 0.416666667  |
| 0.416666667  |
| 1            |
| 0.5588235294 |
| 1            |
| 0.5          |
| 0.416666667  |
| 1            |
| 1            |
| 1            |
| 0.6773654476 |
| 1            |
| 0.6256684492 |
| 1            |
| 1            |
| 1            |
| 0.6295677362 |
| 0.6295677362 |
| 0.6295677362 |
| 0.416666667  |
| 1            |
| 0.416666667  |
| 0.6256684492 |
| 0.5588235294 |
| 0.6773654476 |
| 1            |
| 0.416666667  |
| 1            |
| 1            |
| 0.6773654476 |
| 0.1379790553 |
| 0.6773654476 |
| 0.416666667  |
| 0.166666667  |
| 1            |
| 0.2869875223 |
| 1            |
| 0.166666667  |
| 0.6256684492 |
| 0.6256684492 |
| 0.6256684492 |
| 0.416666667  |
| 0.416666667  |
| 0.416666667  |
| 1            |
| 1            |
| 1            |
| 1            |

|              |
|--------------|
| 0.6256684492 |
| 0.1666666667 |
| 1            |
| 0.25         |
| 0.4166666667 |
| 0.4166666667 |
| 0.25         |
| 1            |
| 0.6256684492 |
| 0.25         |
| 0.6256684492 |
| 0.25         |
| 1            |
| 0.5588235294 |
| 1            |
| 1            |
| 1            |
| 1            |
| 1            |
| 1            |
| 0.25         |
| 1            |
| 0.4166666667 |
| 0.4166666667 |
| 0.6773654476 |
| 1            |
| 1            |
| 1            |
| 0.4166666667 |
| 0.1666666667 |
| 0.4166666667 |
| 0.4166666667 |
| 0.5          |
| 0.4166666667 |
| 0.6256684492 |
| 0.5588235294 |
| 0.5588235294 |
| 1            |
| 1            |
| 0.0637254902 |
| 0.1666666667 |
| 0.209972112  |
| 0.4166666667 |
| 0.4166666667 |
| 1            |
| 0.6773654476 |
| 0.5          |
| 0.5          |
| 1            |
| 1            |
| 0.5588235294 |

|              |
|--------------|
| 0.5588235294 |
| 0.5588235294 |
| 0.2869875223 |
| 0.376114082  |
| 1            |
| 1            |
| 0.6773654476 |
| 0.376114082  |
| 0.376114082  |
| 0.376114082  |
| 0.1247771836 |
| 0.2869875223 |
| 0.6295677362 |
| 0.6295677362 |
| 1            |
| 1            |
| 0.4681927731 |
| 0.6773654476 |
| 0.1379790553 |
| 0.209972112  |
| 0.1379790553 |
| 0.1379790553 |
| 0.6256684492 |
| 1            |
| 0.4166666667 |
| 1            |
| 0.5          |
| 1            |
| 0.4166666667 |
| 0.4166666667 |
| 0.25         |
| 0.25         |
| 1            |
| 1            |
| 1            |
| 1            |
| 1            |
| 1            |
| 1            |
| 0.4166666667 |
| 0.4166666667 |
| 0.4166666667 |
| 0.376114082  |
| 0.5588235294 |
| 1            |
| 1            |
| 1            |
| 1            |
| 0.4166666667 |
| 1            |
| 1            |



|              |
|--------------|
| 1            |
| 1            |
| 1            |
| 1            |
| 1            |
| 1            |
| 1            |
| 1            |
| 1            |
| 1            |
| 1            |
| 1            |
| 1            |
| 1            |
| 0.166666667  |
| 0.1379790553 |
| 0.6773654476 |
| 0.416666667  |
| 0.416666667  |
| 1            |
| 1            |
| 1            |
| 1            |
| 0.6773654476 |
| 0.6773654476 |
| 0.5588235294 |
| 1            |
| 1            |
| 1            |
| 1            |
| 0.416666667  |
| 1            |
| 0.416666667  |
| 1            |
| 0.3666803232 |
| 1            |
| 0.6773654476 |
| 0.416666667  |
| 0.5          |
| 0.6256684492 |
| 1            |
| 0.5588235294 |
| 1            |
| 0.5588235294 |
| 0.0637254902 |
| 0.2869875223 |
| 0.2869875223 |
| 0.25         |
| 0.416666667  |
| 0.5588235294 |
| 0.416666667  |
| 1            |

|              |
|--------------|
| 1            |
| 0.25         |
| 1            |
| 0.376114082  |
| 0.0637254902 |
| 0.25         |
| 0.4166666667 |
| 1            |
| 1            |
| 1            |
| 0.2869875223 |
| 0.2869875223 |
| 0.2869875223 |
| 0.4166666667 |
| 1            |
| 0.25         |
| 1            |
| 1            |
| 0.5588235294 |
| 0.2869875223 |
| 0.25         |
| 0.6256684492 |
| 0.25         |
| 0.5588235294 |
| 0.5588235294 |
| 1            |
| 0.25         |
| 0.5588235294 |
| 0.25         |
| 0.5588235294 |
| 0.5588235294 |
| 0.5588235294 |
| 0.25         |
| 0.5588235294 |
| 0.5588235294 |
| 0.25         |
| 0.5588235294 |
| 0.25         |
| 0.25         |
| 0.5588235294 |
| 0.6256684492 |
| 0.6256684492 |
| 1            |
| 1            |
| 1            |
| 0.6256684492 |
| 0.4178238744 |
| 1            |
| 1            |
| 0.4166666667 |
| 0.5588235294 |

|              |
|--------------|
| 0.6295677362 |
| 0.25         |
| 1            |
| 0.6256684492 |
| 0.25         |
| 0.376114082  |
| 1            |
| 1            |
| 0.25         |
| 1            |
| 0.376114082  |
| 0.376114082  |
| 0.6773654476 |
| 0.376114082  |
| 0.376114082  |
| 0.25         |
| 0.376114082  |
| 0.6773654476 |
| 0.25         |
| 0.25         |
| 1            |
| 0.5          |
| 0.25         |
| 0.4178238744 |
| 0.6256684492 |
| 0.25         |
| 0.25         |
| 0.376114082  |
| 1            |
| 0.4178238744 |
| 1            |
| 1            |
| 1            |
| 1            |
| 0.6773654476 |
| 1            |
| 0.4166666667 |
| 0.5588235294 |
| 1            |
| 1            |
| 1            |
| 1            |
| 1            |
| 1            |
| 1            |
| 0.1666666667 |
| 1            |
| 0.5588235294 |
| 0.25         |
| 1            |
| 1            |





|              |
|--------------|
| 1            |
| 1            |
| 1            |
| 1            |
| 1            |
| 0.416666667  |
| 0.416666667  |
| 1            |
| 0.416666667  |
| 1            |
| 0.416666667  |
| 0.416666667  |
| 0.5          |
| 0.5          |
| 0.6256684492 |
| 0.416666667  |
| 1            |
| 1            |
| 0.416666667  |
| 0.416666667  |
| 0.416666667  |
| 0.416666667  |
| 0.416666667  |
| 0.416666667  |
| 1            |
| 0.416666667  |
| 0.416666667  |
| 1            |
| 0.416666667  |
| 0.416666667  |
| 0.416666667  |
| 0.5          |
| 0.416666667  |
| 0.5          |
| 1            |
| 1            |
| 0.5          |
| 0.5          |
| 0.5          |
| 0.5          |
| 0.5          |
| 0.416666667  |
| 0.416666667  |
| 0.416666667  |
| 1            |
| 0.5          |
| 0.416666667  |
| 0.5          |
| 0.416666667  |
| 0.166666667  |
| 0.416666667  |

|              |
|--------------|
| 1            |
| 0.5          |
| 0.5          |
| 1            |
| 0.5          |
| 1            |
| 1            |
| 0.416666667  |
| 1            |
| 0.416666667  |
| 0.416666667  |
| 0.416666667  |
| 0.416666667  |
| 0.416666667  |
| 0.416666667  |
| 0.416666667  |
| 0.416666667  |
| 0.416666667  |
| 0.5          |
| 0.416666667  |
| 1            |
| 1            |
| 1            |
| 0.416666667  |
| 0.416666667  |
| 0.416666667  |
| 1            |
| 1            |
| 0.166666667  |
| 1            |
| 0.416666667  |
| 0.416666667  |
| 1            |
| 0.5          |
| 1            |
| 1            |
| 1            |
| 1            |
| 1            |
| 1            |
| 1            |
| 1            |
| 0.166666667  |
| 0.5          |
| 1            |
| 1            |
| 1            |
| 1            |
| 1            |
| 1            |
| 1            |
| 0.6256684492 |
| 1            |
| 1            |
| 1            |
| 1            |
| 1            |



|              |
|--------------|
| 1            |
| 1            |
| 1            |
| 1            |
| 0.6256684492 |
| 1            |
| 0.6256684492 |
| 1            |
| 1            |
| 1            |
| 1            |
| 0.5          |
| 0.5588235294 |
| 1            |
| 1            |
| 0.5          |
| 1            |
| 0.6256684492 |
| 1            |
| 1            |
| 1            |
| 1            |
| 1            |
| 0.1666666667 |
| 1            |
| 0.5588235294 |
| 1            |
| 0.5588235294 |
| 1            |
| 0.4166666667 |
| 1            |
| 1            |
| 1            |
| 1            |
| 1            |
| 1            |
| 1            |
| 1            |
| 1            |
| 0.4166666667 |
| 1            |
| 0.1666666667 |
| 1            |
| 0.1666666667 |
| 1            |
| 1            |
| 1            |
| 0.1666666667 |
| 0.4166666667 |
| 0.209972112  |
| 1            |

|              |
|--------------|
| 1            |
| 1            |
| 1            |
| 1            |
| 1            |
| 1            |
| 1            |
| 1            |
| 0.5          |
| 1            |
| 1            |
| 1            |
| 0.416666667  |
| 0.166666667  |
| 0.5588235294 |
| 1            |
| 1            |
| 1            |
| 1            |
| 1            |
| 0.6773654476 |
| 1            |
| 1            |
| 1            |
| 0.5588235294 |
| 0.166666667  |
| 1            |
| 1            |
| 1            |
| 1            |
| 0.416666667  |
| 0.416666667  |
| 0.416666667  |
| 1            |
| 1            |
| 1            |
| 1            |
| 1            |
| 0.5          |
| 1            |
| 1            |
| 1            |
| 1            |
| 1            |
| 1            |
| 0.6295677362 |
| 1            |
| 0.416666667  |
| 1            |
| 1            |
| 1            |
| 0.4240540589 |

|              |
|--------------|
| 1            |
| 1            |
| 1            |
| 1            |
| 1            |
| 0.5588235294 |
| 0.25         |
| 0.25         |
| 1            |
| 1            |
| 1            |
| 1            |
| 1            |
| 1            |
| 1            |
| 1            |
| 1            |
| 0.4166666667 |
| 1            |
| 1            |
| 1            |
| 1            |
| 0.4166666667 |
| 1            |
| 1            |
| 1            |
| 0.4166666667 |
| 1            |
| 1            |
| 0.4166666667 |
| 1            |
| 0.4166666667 |
| 1            |
| 0.4166666667 |
| 1            |
| 0.4166666667 |
| 1            |
| 0.5588235294 |
| 1            |
| 0.4166666667 |
| 0.5588235294 |
| 1            |
| 1            |
| 1            |
| 1            |
| 0.376114082  |
| 1            |
| 1            |
| 0.376114082  |
| 0.4166666667 |
| 0.4166666667 |
| 0.4166666667 |

|              |
|--------------|
| 0.376114082  |
| 0.416666667  |
| 0.416666667  |
| 0.416666667  |
| 0.416666667  |
| 1            |
| 1            |
| 0.416666667  |
| 0.5          |
| 0.416666667  |
| 1            |
| 0.3666803232 |
| 1            |
| 1            |
| 1            |
| 1            |
| 1            |
| 0.416666667  |
| 1            |
| 1            |
| 1            |
| 1            |
| 1            |
| 0.416666667  |
| 1            |
| 1            |
| 0.416666667  |
| 0.416666667  |
| 0.416666667  |
| 0.5588235294 |
| 0.5588235294 |
| 1            |
| 1            |
| 1            |
| 1            |
| 0.416666667  |
| 1            |
| 1            |
| 0.5588235294 |
| 0.376114082  |
| 1            |
| 0.416666667  |
| 1            |
| 1            |
| 1            |
| 0.5          |
| 1            |
| 1            |
| 1            |



|              |
|--------------|
| 1            |
| 1            |
| 1            |
| 0.5588235294 |
| 1            |
| 0.5588235294 |
| 1            |
| 1            |
| 1            |
| 1            |
| 1            |
| 1            |
| 1            |
| 1            |
| 1            |
| 1            |
| 0.5588235294 |
| 1            |
| 1            |
| 1            |
| 1            |
| 1            |
| 0.4166666667 |
| 1            |
| 1            |
| 1            |
| 0.4166666667 |
| 0.4166666667 |
| 1            |
| 0.4166666667 |
| 0.4166666667 |
| 0.4166666667 |
| 0.4166666667 |
| 0.4166666667 |
| 0.4166666667 |
| 1            |
| 0.5588235294 |
| 1            |
| 0.5588235294 |
| 0.5588235294 |
| 1            |
| 1            |
| 1            |
| 1            |
| 1            |
| 0.4166666667 |
| 1            |
| 0.4166666667 |
| 0.4166666667 |
| 0.4166666667 |
| 0.5588235294 |
| 0.5588235294 |

|              |
|--------------|
| 1            |
| 0.376114082  |
| 1            |
| 1            |
| 0.416666667  |
| 0.416666667  |
| 0.3666803232 |
| 1            |
| 0.416666667  |
| 1            |
| 1            |
| 0.416666667  |
| 1            |
| 0.6256684492 |
| 1            |
| 0.416666667  |
| 0.416666667  |
| 0.416666667  |
| 0.416666667  |
| 0.416666667  |
| 0.416666667  |
| 0.416666667  |
| 0.416666667  |
| 1            |
| 1            |
| 1            |
| 1            |
| 0.5588235294 |
| 0.416666667  |
| 0.5588235294 |
| 0.6256684492 |
| 0.0637254902 |
| 1            |
| 1            |
| 0.5          |
| 0.5          |
| 1            |
| 1            |
| 0.416666667  |
| 0.5588235294 |
| 0.5588235294 |
| 0.5588235294 |
| 1            |
| 0.416666667  |
| 0.416666667  |
| 0.416666667  |
| 0.5          |
| 1            |
| 0.1379790553 |
| 0.166666667  |
| 1            |



|              |
|--------------|
| 1            |
| 1            |
| 1            |
| 1            |
| 1            |
| 0.1247771836 |
| 1            |
| 1            |
| 0.6773654476 |
| 1            |
| 1            |
| 1            |
| 1            |
| 0.6773654476 |
| 1            |
| 0.6256684492 |
| 0.5588235294 |
| 0.6773654476 |
| 0.6773654476 |
| 0.6773654476 |
| 0.6773654476 |
| 0.4166666667 |
| 1            |
| 1            |
| 0.4178238744 |
| 0.1666666667 |
| 1            |
| 1            |
| 1            |
| 1            |
| 0.5          |
| 1            |
| 1            |
| 0.1666666667 |
| 0.6256684492 |
| 1            |
| 1            |
| 1            |
| 1            |
| 0.1379790553 |
| 0.1379790553 |
| 0.1666666667 |
| 0.6256684492 |
| 0.6256684492 |
| 0.4166666667 |
| 1            |
| 1            |
| 1            |
| 1            |
| 1            |
| 1            |

|              |
|--------------|
| 0.5588235294 |
| 1            |
| 0.4166666667 |
| 0.4166666667 |
| 0.4166666667 |
| 0.4166666667 |
| 0.25         |
| 1            |
| 1            |
| 1            |
| 1            |
| 0.25         |
| 1            |
| 1            |
| 0.376114082  |
| 0.2869875223 |
| 0.5588235294 |
| 1            |
| 0.4166666667 |
| 1            |
| 1            |
| 0.4166666667 |
| 1            |
| 1            |
| 0.1666666667 |
| 0.3666803232 |
| 0.3666803232 |
| 0.3666803232 |
| 0.5588235294 |
| 1            |
| 1            |
| 0.4166666667 |
| 1            |
| 1            |
| 1            |
| 0.376114082  |
| 0.2869875223 |
| 1            |
| 1            |
| 0.2869875223 |
| 1            |
| 1            |
| 1            |
| 0.6256684492 |
| 1            |
| 0.6256684492 |
| 0.6256684492 |
| 0.2869875223 |
| 0.5588235294 |
| 0.25         |
| 1            |

|              |
|--------------|
| 1            |
| 0.6773654476 |
| 1            |
| 0.5588235294 |
| 1            |
| 1            |
| 1            |
| 1            |
| 1            |
| 1            |
| 0.4166666667 |
| 1            |
| 1            |
| 0.2869875223 |
| 0.1666666667 |
| 1            |
| 0.6295677362 |
| 1            |
| 1            |
| 0.1247771836 |
| 1            |
| 1            |
| 1            |
| 0.209972112  |
| 1            |
| 1            |
| 1            |
| 1            |
| 0.376114082  |
| 0.5588235294 |
| 0.5          |
| 0.6773654476 |
| 0.25         |
| 1            |
| 1            |
| 1            |
| 0.4166666667 |
| 0.4166666667 |
| 1            |
| 1            |
| 0.4178238744 |
| 0.2869875223 |
| 0.1666666667 |
| 0.25         |
| 1            |
| 0.6773654476 |
| 1            |
| 1            |
| 0.1666666667 |
| 0.1666666667 |
| 1            |

|              |
|--------------|
| 1            |
| 1            |
| 0.1247771836 |
| 0.2869875223 |
| 0.1379790553 |
| 0.6773654476 |
| 0.4166666667 |
| 1            |
| 0.6256684492 |
| 0.6295677362 |
| 1            |
| 0.4166666667 |
| 0.209972112  |
| 0.6295677362 |
| 1            |
| 1            |
| 1            |
| 1            |
| 0.5          |
| 1            |
| 0.2869875223 |
| 0.2869875223 |
| 0.209972112  |
| 1            |
| 1            |
| 0.1379790553 |
| 1            |
| 0.376114082  |
| 0.4166666667 |
| 1            |
| 0.5          |
| 0.6773654476 |
| 1            |
| 1            |
| 0.4166666667 |
| 1            |
| 0.6256684492 |
| 0.4166666667 |
| 1            |
| 0.4166666667 |
| 1            |
| 0.5          |
| 1            |
| 0.25         |
| 1            |
| 0.1379790553 |
| 1            |
| 0.4166666667 |
| 0.6256684492 |
| 1            |
| 0.6773654476 |

|              |
|--------------|
| 1            |
| 1            |
| 0.6295677362 |
| 1            |
| 0.2869875223 |
| 1            |
| 0.5          |
| 0.1666666667 |
| 0.4166666667 |
| 0.4166666667 |
| 0.1666666667 |
| 1            |
| 1            |
| 1            |
| 0.5          |
| 1            |
| 1            |
| 0.6256684492 |
| 1            |
| 1            |
| 0.1247771836 |
| 0.4178238744 |
| 1            |
| 1            |
| 1            |
| 0.2869875223 |
| 1            |
| 1            |
| 0.4166666667 |
| 1            |
| 0.25         |
| 1            |
| 0.4166666667 |
| 1            |
| 1            |
| 0.6773654476 |
| 0.209972112  |
| 0.5          |
| 1            |
| 1            |
| 1            |
| 1            |
| 0.4166666667 |
| 1            |
| 1            |
| 0.1666666667 |
| 0.1666666667 |
| 0.4166666667 |
| 0.5          |
| 0.25         |
| 0.6256684492 |



|              |
|--------------|
| 1            |
| 0.5          |
| 1            |
| 0.25         |
| 0.2869875223 |
| 0.6256684492 |
| 1            |
| 0.25         |
| 1            |
| 0.1666666667 |
| 1            |
| 0.6256684492 |
| 0.1379790553 |
| 1            |
| 0.1666666667 |
| 0.4166666667 |
| 1            |
| 0.4166666667 |
| 0.6295677362 |
| 0.2869875223 |
| 1            |
| 1            |
| 0.1666666667 |
| 0.4166666667 |
| 1            |
| 0.6256684492 |
| 0.6773654476 |
| 0.1666666667 |
| 0.2869875223 |
| 1            |
| 1            |
| 0.3666803232 |
| 0.1666666667 |
| 0.4166666667 |
| 0.5          |
| 0.1379790553 |
| 0.1666666667 |
| 0.4166666667 |
| 0.25         |
| 0.6256684492 |
| 1            |
| 1            |
| 0.0637254902 |
| 1            |
| 0.4166666667 |
| 0.5588235294 |
| 0.1379790553 |
| 0.5588235294 |
| 0.25         |
| 0.5588235294 |
| 0.1666666667 |

|              |
|--------------|
| 0.5          |
| 1            |
| 0.5588235294 |
| 1            |
| 1            |
| 0.4166666667 |
| 0.4166666667 |
| 1            |
| 1            |
| 0.5588235294 |
| 1            |
| 0.6256684492 |
| 0.4166666667 |
| 1            |
| 1            |
| 1            |
| 1            |
| 1            |
| 1            |
| 0.6256684492 |
| 0.4166666667 |
| 1            |
| 1            |
| 1            |
| 1            |
| 1            |
| 1            |
| 1            |
| 1            |
| 1            |
| 0.2869875223 |
| 1            |
| 1            |
| 1            |
| 1            |
| 1            |
| 1            |
| 1            |
| 0.5588235294 |
| 0.4166666667 |
| 0.5          |
| 1            |
| 1            |
| 1            |
| 0.5588235294 |
| 0.6256684492 |
| 0.1666666667 |
| 0.209972112  |
| 0.7210233593 |
| 0.0637254902 |
| 1            |

|              |
|--------------|
| 1            |
| 1            |
| 0.6256684492 |
| 0.5          |
| 0.4166666667 |
| 1            |
| 0.6256684492 |
| 1            |
| 1            |
| 1            |
| 0.1666666667 |
| 0.5588235294 |
| 0.376114082  |
| 1            |
| 1            |
| 1            |
| 1            |
| 0.4166666667 |
| 1            |
| 0.4166666667 |
| 1            |
| 0.376114082  |
| 0.6773654476 |
| 1            |
| 1            |
| 1            |
| 1            |
| 0.2869875223 |
| 0.5588235294 |
| 1            |
| 0.2869875223 |
| 1            |
| 1            |
| 0.2869875223 |
| 1            |
| 1            |
| 1            |
| 1            |
| 0.1666666667 |
| 0.1666666667 |
| 0.1666666667 |
| 1            |
| 0.4166666667 |
| 1            |
| 0.6737806193 |
| 1            |
| 1            |
| 1            |
| 1            |
| 1            |
| 1            |

|              |
|--------------|
| 1            |
| 1            |
| 0.416666667  |
| 0.6256684492 |
| 1            |
| 0.5588235294 |
| 1            |
| 0.6256684492 |
| 0.25         |
| 0.5          |
| 0.5          |
| 0.5588235294 |
| 0.5          |
| 1            |
| 1            |
| 1            |
| 0.5588235294 |
| 1            |
| 1            |
| 0.5588235294 |
| 1            |
| 0.25         |
| 1            |
| 1            |
| 1            |
| 0.5          |
| 1            |
| 0.2869875223 |
| 0.2869875223 |
| 1            |
| 0.416666667  |
| 0.416666667  |
| 1            |
| 0.6773654476 |
| 0.5588235294 |
| 0.2869875223 |
| 1            |
| 0.416666667  |
| 0.5          |
| 0.5588235294 |
| 0.5588235294 |
| 1            |
| 1            |
| 1            |
| 0.6256684492 |
| 1            |
| 1            |
| 0.0637254902 |
| 0.416666667  |
| 0.6256684492 |
| 0.25         |

|              |
|--------------|
| 1            |
| 1            |
| 0.5588235294 |
| 0.4166666667 |
| 0.6295677362 |
| 0.4166666667 |
| 0.5          |
| 1            |
| 1            |
| 0.0637254902 |
| 0.5          |
| 1            |
| 1            |
| 1            |
| 0.4166666667 |
| 0.6256684492 |
| 1            |
| 0.4166666667 |
| 0.25         |
| 1            |
| 0.4166666667 |
| 0.1379790553 |
| 0.4166666667 |
| 1            |
| 0.4166666667 |
| 0.5          |
| 0.1379790553 |
| 1            |
| 0.376114082  |
| 0.6256684492 |
| 1            |
| 0.4166666667 |
| 0.1666666667 |
| 1            |
| 1            |
| 1            |
| 0.5588235294 |
| 0.1379790553 |
| 1            |
| 1            |
| 0.1247771836 |
| 0.4166666667 |
| 0.1379790553 |
| 1            |
| 0.1379790553 |
| 1            |
| 1            |
| 0.5          |
| 0.1379790553 |
| 0.2869875223 |
| 1            |

|              |
|--------------|
| 1            |
| 0.1666666667 |
| 1            |
| 0.1379790553 |
| 1            |
| 1            |
| 1            |
| 0.5          |
| 1            |
| 1            |
| 0.4166666667 |
| 0.4166666667 |
| 0.4166666667 |
| 0.4166666667 |
| 0.1666666667 |
| 0.6256684492 |
| 0.5588235294 |
| 0.4178238744 |
| 0.4166666667 |
| 1            |
| 0.4166666667 |
| 0.2869875223 |
| 0.4166666667 |
| 0.4166666667 |
| 1            |
| 0.4166666667 |
| 1            |
| 0.1666666667 |
| 1            |
| 1            |
| 0.1247771836 |
| 1            |
| 0.4166666667 |
| 1            |
| 0.5588235294 |
| 0.376114082  |
| 1            |
| 1            |
| 0.4166666667 |
| 1            |
| 1            |
| 0.6256684492 |
| 0.2869875223 |
| 0.4166666667 |
| 1            |
| 0.5588235294 |
| 1            |
| 0.5588235294 |
| 1            |
| 1            |
| 1            |



|              |
|--------------|
| 1            |
| 1            |
| 1            |
| 1            |
| 1            |
| 0.25         |
| 0.416666667  |
| 1            |
| 0.25         |
| 1            |
| 1            |
| 1            |
| 0.1379790553 |
| 0.2869875223 |
| 1            |
| 1            |
| 0.416666667  |
| 0.25         |
| 1            |
| 1            |
| 0.25         |
| 1            |
| 1            |
| 1            |
| 1            |
| 1            |
| 0.5588235294 |
| 1            |
| 1            |
| 0.376114082  |
| 1            |
| 1            |
| 1            |
| 0.5          |
| 0.5588235294 |
| 1            |
| 1            |
| 1            |
| 1            |
| 1            |
| 0.6256684492 |
| 1            |
| 1            |
| 1            |
| 0.416666667  |
| 0.376114082  |
| 0.416666667  |
| 0.2869875223 |
| 1            |
| 1            |
| 0.5          |



|              |
|--------------|
| 1            |
| 0.416666667  |
| 0.416666667  |
| 0.25         |
| 1            |
| 0.416666667  |
| 1            |
| 0.1247771836 |
| 1            |
| 1            |
| 0.416666667  |
| 1            |
| 1            |
| 1            |
| 1            |
| 1            |
| 1            |
| 1            |
| 1            |
| 1            |
| 1            |
| 0.5          |
| 1            |
| 1            |
| 1            |
| 1            |
| 0.376114082  |
| 1            |
| 1            |
| 0.416666667  |
| 0.6295677362 |
| 0.25         |
| 1            |
| 0.416666667  |
| 0.6256684492 |
| 0.5588235294 |
| 1            |
| 0.6295677362 |
| 1            |
| 0.209972112  |
| 0.5588235294 |
| 0.5588235294 |
| 0.416666667  |
| 0.5588235294 |
| 1            |
| 1            |
| 0.416666667  |
| 1            |
| 1            |
| 0.5588235294 |
| 1            |
| 1            |

|              |
|--------------|
| 1            |
| 0.209972112  |
| 1            |
| 0.416666667  |
| 1            |
| 1            |
| 0.5588235294 |
| 1            |
| 1            |
| 0.416666667  |
| 1            |
| 0.376114082  |
| 0.6773654476 |
| 0.416666667  |
| 0.416666667  |
| 1            |
| 0.5588235294 |
| 0.416666667  |
| 1            |
| 0.416666667  |
| 1            |
| 0.416666667  |
| 1            |
| 0.25         |
| 0.416666667  |
| 1            |
| 0.6940287188 |
| 1            |
| 1            |
| 0.416666667  |
| 0.6295677362 |
| 0.5588235294 |
| 0.416666667  |
| 0.5588235294 |
| 1            |
| 0.416666667  |
| 1            |
| 0.25         |
| 1            |
| 1            |
| 1            |
| 1            |
| 1            |
| 1            |
| 1            |
| 1            |
| 1            |
| 1            |
| 0.416666667  |
| 1            |
| 0.6256684492 |
| 0.166666667  |
| 0.416666667  |

|              |
|--------------|
| 0.6295677362 |
| 1            |
| 1            |
| 0.6256684492 |
| 1            |
| 1            |
| 0.1379790553 |
| 0.5588235294 |
| 0.4166666667 |
| 0.5588235294 |
| 0.209972112  |
| 1            |
| 1            |
| 1            |
| 1            |
| 1            |
| 1            |
| 0.4166666667 |
| 1            |
| 0.4166666667 |
| 1            |
| 1            |
| 1            |
| 1            |
| 1            |
| 1            |
| 0.5          |
| 1            |
| 1            |
| 0.376114082  |
| 1            |
| 1            |
| 0.4240540589 |
| 0.5588235294 |
| 1            |
| 1            |
| 1            |
| 0.25         |
| 1            |
| 0.25         |
| 0.2869875223 |
| 1            |
| 0.5588235294 |
| 0.25         |
| 0.4166666667 |
| 0.4178238744 |
| 0.25         |
| 0.6295677362 |
| 0.25         |
| 1            |
| 0.5          |

|              |
|--------------|
| 0.416666667  |
| 0.1247771836 |
| 1            |
| 1            |
| 0.5588235294 |
| 0.166666667  |
| 0.5588235294 |
| 1            |
| 1            |
| 0.416666667  |
| 0.5          |
| 1            |
| 1            |
| 0.166666667  |
| 0.416666667  |
| 0.5588235294 |
| 1            |
| 0.376114082  |
| 0.6256684492 |
| 0.166666667  |
| 1            |
| 1            |
| 0.5588235294 |
| 0.416666667  |
| 1            |
| 1            |
| 0.2869875223 |
| 0.25         |
| 1            |
| 0.5588235294 |
| 0.416666667  |
| 0.209972112  |
| 0.6256684492 |
| 0.25         |
| 0.25         |
| 0.6256684492 |
| 0.6773654476 |
| 0.5588235294 |
| 0.416666667  |
| 0.6773654476 |
| 1            |
| 1            |
| 1            |
| 1            |
| 0.6737806193 |
| 1            |
| 0.416666667  |
| 1            |
| 1            |
| 0.416666667  |
| 1            |

|              |
|--------------|
| 0.209972112  |
| 1            |
| 0.6256684492 |
| 0.5588235294 |
| 0.2869875223 |
| 0.6295677362 |
| 1            |
| 1            |
| 0.1379790553 |
| 0.1379790553 |
| 0.4166666667 |
| 1            |
| 0.1666666667 |
| 1            |
| 1            |
| 0.6256684492 |
| 0.6256684492 |
| 0.6256684492 |
| 1            |
| 1            |
| 0.5          |
| 1            |
| 1            |
| 0.2869875223 |
| 1            |
| 1            |
| 1            |
| 1            |
| 0.4178238744 |
| 1            |
| 0.25         |
| 0.6737806193 |
| 0.2869875223 |
| 0.5588235294 |
| 0.5588235294 |
| 1            |
| 0.5588235294 |
| 1            |
| 1            |
| 1            |
| 1            |
| 1            |
| 1            |
| 1            |
| 1            |
| 0.1666666667 |
| 0.4166666667 |
| 1            |
| 0.4166666667 |
| 1            |
| 1            |
| 1            |

|              |
|--------------|
| 1            |
| 1            |
| 1            |
| 1            |
| 1            |
| 1            |
| 1            |
| 0.1379790553 |
| 0.209972112  |
| 0.209972112  |
| 0.209972112  |
| 1            |
| 0.1379790553 |
| 0.6256684492 |
| 1            |
| 0.6256684492 |
| 1            |
| 0.5          |
| 0.1666666667 |
| 0.376114082  |
| 0.6256684492 |
| 0.1666666667 |
| 0.4166666667 |
| 0.1666666667 |
| 1            |
| 1            |
| 1            |
| 0.5          |
| 0.25         |
| 0.25         |
| 0.5          |
| 0.25         |
| 1            |
| 1            |
| 1            |
| 1            |
| 1            |
| 1            |
| 1            |
| 1            |
| 1            |
| 1            |
| 1            |
| 1            |
| 1            |
| 1            |
| 1            |
| 1            |
| 1            |
| 1            |
| 0.6256684492 |
| 0.6256684492 |
| 1            |
| 0.376114082  |

|              |
|--------------|
| 0.6773654476 |
| 0.6773654476 |
| 0.6295677362 |
| 1            |
| 0.4178238744 |
| 0.2869875223 |
| 0.5588235294 |
| 0.5588235294 |
| 0.5588235294 |
| 0.1666666667 |
| 0.5588235294 |
| 0.1666666667 |
| 0.0637254902 |
| 0.1666666667 |
| 0.1666666667 |
| 0.25         |
| 0.4166666667 |
| 0.4166666667 |
| 0.1666666667 |
| 0.4166666667 |
| 0.4166666667 |
| 0.4166666667 |
| 0.4166666667 |
| 0.1666666667 |
| 0.1666666667 |
| 0.4166666667 |
| 0.1666666667 |
| 0.1666666667 |
| 1            |
| 1            |
| 0.6256684492 |
| 0.6256684492 |
| 0.6256684492 |
| 1            |
| 1            |
| 1            |
| 1            |
| 0.4166666667 |
| 0.4166666667 |
| 1            |
| 0.1666666667 |
| 1            |
| 1            |
| 0.4166666667 |
| 0.4166666667 |
| 1            |
| 0.2869875223 |
| 0.6295677362 |
| 0.1379790553 |
| 0.2869875223 |
| 0.6773654476 |

|              |
|--------------|
| 0.1379790553 |
| 0.5588235294 |
| 1            |
| 1            |
| 1            |
| 1            |
| 1            |
| 1            |
| 1            |
| 1            |
| 1            |
| 1            |
| 0.1379790553 |
| 0.1379790553 |
| 0.2869875223 |
| 1            |
| 1            |
| 0.4166666667 |
| 1            |
| 1            |
| 1            |
| 0.5          |
| 0.2869875223 |
| 1            |
| 1            |
| 1            |
| 0.5588235294 |
| 0.5          |
| 1            |
| 0.5          |
| 1            |
| 1            |
| 1            |
| 1            |
| 0.4166666667 |
| 0.4166666667 |
| 1            |
| 0.4166666667 |
| 0.4166666667 |
| 0.4166666667 |
| 0.4166666667 |
| 0.4166666667 |
| 0.4166666667 |
| 0.4166666667 |
| 1            |
| 1            |
| 1            |
| 0.6256684492 |
| 0.6256684492 |
| 1            |
| 1            |
| 1            |



|              |
|--------------|
| 0.6256684492 |
| 1            |
| 0.6256684492 |
| 0.1666666667 |
| 0.1666666667 |
| 0.5588235294 |
| 1            |
| 1            |
| 1            |
| 1            |
| 0.4166666667 |
| 1            |
| 1            |
| 1            |
| 1            |
| 1            |
| 0.6940287188 |
| 0.5588235294 |
| 0.6295677362 |
| 0.6940287188 |
| 0.5588235294 |
| 0.376114082  |
| 1            |
| 1            |
| 0.4178238744 |
| 1            |
| 1            |
| 0.4166666667 |
| 0.209972112  |
| 1            |
| 0.2869875223 |
| 0.6256684492 |
| 0.4166666667 |
| 0.6256684492 |
| 0.4166666667 |
| 1            |
| 1            |
| 0.5588235294 |
| 0.6256684492 |
| 0.061942959  |
| 0.5588235294 |
| 1            |
| 0.6256684492 |
| 1            |
| 1            |
| 1            |
| 0.25         |
| 0.25         |
| 0.5588235294 |
| 0.4166666667 |
| 0.4166666667 |



|              |
|--------------|
| 1            |
| 0.6256684492 |
| 0.2869875223 |
| 0.5588235294 |
| 0.4166666667 |
| 1            |
| 0.6256684492 |
| 0.3666803232 |
| 0.2869875223 |
| 1            |
| 1            |
| 0.6256684492 |
| 1            |
| 1            |
| 0.5          |
| 1            |
| 1            |
| 1            |
| 0.1666666667 |
| 1            |
| 1            |
| 1            |
| 1            |
| 1            |
| 0.2869875223 |
| 1            |
| 1            |
| 0.25         |
| 0.25         |
| 0.5588235294 |
| 0.376114082  |
| 0.376114082  |
| 1            |
| 1            |
| 0.2869875223 |
| 0.2869875223 |
| 0.4166666667 |
| 0.4166666667 |
| 0.4166666667 |
| 0.4166666667 |
| 0.4166666667 |
| 0.4166666667 |
| 0.4166666667 |
| 0.4166666667 |
| 1            |
| 1            |
| 0.4166666667 |
| 1            |
| 0.6256684492 |
| 0.5588235294 |
| 1            |
| 1            |

|              |
|--------------|
| 0.6773654476 |
| 0.6940287188 |
| 1            |
| 1            |
| 0.1247771836 |
| 0.4166666667 |
| 0.25         |
| 1            |
| 1            |
| 0.6256684492 |
| 1            |
| 1            |
| 0.5588235294 |
| 0.2869875223 |
| 1            |
| 1            |
| 1            |
| 1            |
| 0.4166666667 |
| 0.4166666667 |
| 1            |
| 1            |
| 0.376114082  |
| 0.376114082  |
| 1            |
| 0.5588235294 |
| 0.4166666667 |
| 1            |
| 1            |
| 0.5588235294 |
| 0.376114082  |
| 0.5588235294 |
| 0.4166666667 |
| 0.6256684492 |
| 0.5588235294 |
| 1            |
| 0.4166666667 |
| 0.25         |
| 0.6256684492 |
| 1            |
| 0.5588235294 |
| 1            |
| 1            |
| 0.4166666667 |
| 0.3666803232 |
| 1            |
| 0.6256684492 |
| 1            |
| 1            |
| 1            |
| 0.5          |

|              |
|--------------|
| 1            |
| 1            |
| 0.5588235294 |
| 1            |
| 0.5588235294 |
| 0.4166666667 |
| 0.376114082  |
| 1            |
| 1            |
| 0.2869875223 |
| 0.1379790553 |
| 0.6773654476 |
| 1            |
| 0.6773654476 |
| 0.5588235294 |
| 1            |
| 0.209972112  |
| 1            |
| 1            |
| 1            |
| 0.5588235294 |
| 0.4166666667 |
| 1            |
| 1            |
| 1            |
| 1            |
| 0.5588235294 |
| 0.25         |
| 0.4166666667 |
| 0.209972112  |
| 0.4166666667 |
| 1            |
| 0.4166666667 |
| 0.6295677362 |
| 1            |
| 1            |
| 0.1379790553 |
| 0.5588235294 |
| 1            |
| 0.6256684492 |
| 0.1666666667 |
| 0.4166666667 |
| 0.2869875223 |
| 0.4166666667 |
| 0.4166666667 |
| 1            |
| 0.2869875223 |
| 0.6773654476 |
| 1            |
| 1            |
| 0.376114082  |

|              |
|--------------|
| 0.5588235294 |
| 1            |
| 1            |
| 1            |
| 1            |
| 0.5          |
| 1            |
| 0.6737806193 |
| 0.25         |
| 1            |
| 0.5          |
| 0.1666666667 |
| 0.5588235294 |
| 0.376114082  |
| 1            |
| 0.4166666667 |
| 1            |
| 1            |
| 0.4166666667 |
| 0.376114082  |
| 1            |
| 0.376114082  |
| 1            |
| 1            |
| 1            |
| 0.25         |
| 1            |
| 1            |
| 1            |
| 1            |
| 1            |
| 1            |
| 1            |
| 1            |
| 1            |
| 1            |
| 0.4166666667 |
| 1            |
| 1            |
| 1            |
| 0.4240540589 |
| 0.5588235294 |
| 0.1379790553 |
| 1            |
| 0.5588235294 |
| 0.4166666667 |
| 0.2869875223 |
| 1            |
| 1            |
| 0.25         |
| 1            |
| 1            |
| 0.6773654476 |

|              |
|--------------|
| 0.5          |
| 0.5588235294 |
| 0.6295677362 |
| 1            |
| 1            |
| 0.25         |
| 1            |
| 1            |
| 0.4166666667 |
| 1            |
| 1            |
| 0.5          |
| 0.5588235294 |
| 0.4166666667 |
| 0.3666803232 |
| 0.4166666667 |
| 1            |
| 1            |
| 0.1666666667 |
| 0.209972112  |
| 0.5588235294 |
| 1            |
| 1            |
| 1            |
| 0.6256684492 |
| 1            |
| 0.4166666667 |
| 0.4166666667 |
| 1            |
| 0.6773654476 |
| 0.4166666667 |
| 0.209972112  |
| 1            |
| 1            |
| 0.2869875223 |
| 0.6256684492 |
| 0.25         |
| 0.4166666667 |
| 1            |
| 1            |
| 0.4166666667 |
| 1            |
| 1            |
| 1            |
| 1            |
| 1            |
| 0.1379790553 |
| 0.4166666667 |
| 0.1379790553 |
| 0.1666666667 |
| 1            |

|              |
|--------------|
| 1            |
| 0.5588235294 |
| 1            |
| 0.5588235294 |
| 1            |
| 0.25         |
| 1            |
| 0.4166666667 |
| 1            |
| 0.6256684492 |
| 1            |
| 1            |
| 0.4166666667 |
| 1            |
| 1            |
| 1            |
| 1            |
| 0.5588235294 |
| 0.4166666667 |
| 0.25         |
| 1            |
| 1            |
| 1            |
| 0.5588235294 |
| 0.1666666667 |
| 1            |
| 0.5588235294 |
| 0.25         |
| 0.25         |
| 0.4166666667 |
| 0.5          |
| 0.6773654476 |
| 1            |
| 0.5          |
| 1            |
| 1            |
| 1            |
| 0.4166666667 |
| 0.4166666667 |
| 1            |
| 0.4166666667 |
| 0.6256684492 |
| 1            |
| 1            |
| 1            |
| 0.4166666667 |
| 1            |
| 1            |
| 1            |
| 1            |
| 1            |



|              |
|--------------|
| 1            |
| 1            |
| 0.5          |
| 0.25         |
| 0.25         |
| 0.416666667  |
| 1            |
| 1            |
| 0.6256684492 |
| 0.6256684492 |
| 0.416666667  |
| 1            |
| 1            |
| 0.416666667  |
| 1            |
| 0.416666667  |
| 0.416666667  |
| 1            |
| 1            |
| 1            |
| 0.416666667  |
| 1            |
| 1            |
| 1            |
| 0.2869875223 |
| 0.416666667  |
| 1            |
| 1            |
| 1            |
| 1            |
| 0.5          |
| 0.5588235294 |
| 0.2869875223 |
| 1            |
| 0.6256684492 |
| 0.061942959  |
| 1            |
| 0.6256684492 |
| 0.5588235294 |
| 0.5588235294 |
| 0.5          |
| 0.376114082  |
| 0.376114082  |
| 0.6256684492 |
| 0.25         |
| 0.5          |
| 0.061942959  |
| 1            |
| 0.25         |

|              |
|--------------|
| 1            |
| 1            |
| 0.5          |
| 1            |
| 0.5588235294 |
| 1            |
| 1            |
| 0.5          |
| 1            |
| 1            |
| 1            |
| 1            |
| 1            |
| 0.5588235294 |
| 1            |
| 0.25         |
| 0.416666667  |
| 1            |
| 1            |
| 0.25         |
| 0.25         |
| 1            |
| 1            |
| 1            |
| 0.5          |
| 0.5588235294 |
| 1            |
| 0.3666803232 |
| 1            |
| 1            |
| 1            |
| 0.6256684492 |
| 0.1379790553 |
| 1            |
| 1            |
| 1            |
| 0.5588235294 |
| 0.6256684492 |
| 1            |
| 1            |
| 1            |
| 1            |
| 1            |
| 0.6256684492 |
| 1            |
| 0.5588235294 |
| 0.416666667  |
| 1            |
| 1            |
| 1            |
| 0.376114082  |
| 1            |

|              |
|--------------|
| 1            |
| 1            |
| 0.061942959  |
| 1            |
| 0.376114082  |
| 0.416666667  |
| 1            |
| 0.25         |
| 0.416666667  |
| 1            |
| 1            |
| 0.2869875223 |
| 1            |
| 1            |
| 1            |
| 1            |
| 0.166666667  |
| 1            |
| 1            |
| 1            |
| 0.5          |
| 1            |
| 0.4178238744 |
| 1            |
| 1            |
| 1            |
| 0.2869875223 |
| 0.416666667  |
| 1            |
| 1            |
| 1            |
| 0.5          |
| 1            |
| 1            |
| 1            |
| 0.6256684492 |
| 1            |
| 0.5588235294 |
| 1            |
| 1            |
| 1            |
| 1            |
| 1            |
| 0.5588235294 |
| 1            |
| 0.5588235294 |
| 0.2869875223 |
| 0.1379790553 |
| 1            |
| 0.5          |
| 1            |

|              |
|--------------|
| 1            |
| 1            |
| 1            |
| 1            |
| 1            |
| 0.5588235294 |
| 1            |
| 1            |
| 0.6256684492 |
| 0.2869875223 |
| 0.2869875223 |
| 0.2869875223 |
| 1            |
| 1            |
| 1            |
| 1            |
| 1            |
| 1            |
| 1            |
| 0.2869875223 |
| 0.2869875223 |
| 0.2869875223 |
| 0.4166666667 |
| 0.4166666667 |
| 0.25         |
| 1            |
| 0.4166666667 |
| 0.4166666667 |
| 1            |
| 1            |
| 0.2869875223 |
| 0.2869875223 |
| 0.4166666667 |
| 0.2869875223 |
| 1            |
| 1            |
| 1            |
| 0.4166666667 |
| 0.4166666667 |
| 0.25         |
| 1            |
| 0.5588235294 |
| 0.6256684492 |
| 0.6256684492 |
| 0.6256684492 |
| 0.6256684492 |
| 1            |
| 1            |
| 1            |
| 1            |
| 0.376114082  |

|              |
|--------------|
| 1            |
| 1            |
| 1            |
| 0.6256684492 |
| 1            |
| 0.209972112  |
| 0.209972112  |
| 1            |
| 0.5          |
| 0.1666666667 |
| 1            |
| 1            |
| 1            |
| 0.25         |
| 0.376114082  |
| 0.4166666667 |
| 0.5588235294 |
| 1            |
| 0.4166666667 |
| 1            |
| 0.4166666667 |
| 0.1379790553 |
| 0.1379790553 |
| 1            |
| 0.5588235294 |
| 1            |
| 1            |
| 1            |
| 0.2869875223 |
| 0.4166666667 |
| 1            |
| 0.5588235294 |
| 1            |
| 0.4166666667 |
| 1            |
| 0.25         |
| 0.5          |
| 0.2869875223 |
| 1            |
| 1            |
| 0.6773654476 |
| 0.5588235294 |
| 1            |
| 1            |
| 0.2869875223 |
| 0.5          |
| 1            |
| 0.6256684492 |
| 1            |
| 1            |
| 1            |

|              |
|--------------|
| 0.5588235294 |
| 0.5588235294 |
| 0.5588235294 |
| 1            |
| 1            |
| 1            |
| 0.5588235294 |
| 0.4166666667 |
| 1            |
| 0.5588235294 |
| 0.1666666667 |
| 0.6295677362 |
| 0.6295677362 |
| 1            |
| 0.4166666667 |
| 1            |
| 0.2869875223 |
| 0.5          |
| 0.4166666667 |
| 0.4166666667 |
| 0.6256684492 |
| 1            |
| 0.4166666667 |
| 1            |
| 1            |
| 0.6256684492 |
| 0.6256684492 |
| 0.5588235294 |
| 1            |
| 1            |
| 1            |
| 1            |
| 0.4166666667 |
| 0.6295677362 |
| 0.2869875223 |
| 1            |
| 1            |
| 1            |
| 1            |
| 0.25         |
| 1            |
| 0.4166666667 |
| 1            |
| 1            |
| 0.4166666667 |
| 0.25         |
| 1            |
| 0.4166666667 |
| 1            |
| 1            |
| 1            |

|              |
|--------------|
| 1            |
| 1            |
| 1            |
| 0.6256684492 |
| 1            |
| 1            |
| 1            |
| 0.6256684492 |
| 0.25         |
| 0.25         |
| 1            |
| 0.4166666667 |
| 0.1666666667 |
| 0.1666666667 |
| 0.25         |
| 1            |
| 0.5588235294 |
| 1            |
| 0.5588235294 |
| 0.209972112  |
| 0.5          |
| 1            |
| 0.4166666667 |
| 0.4166666667 |
| 0.4166666667 |
| 1            |
| 0.376114082  |
| 1            |
| 0.4166666667 |
| 1            |
| 0.4166666667 |
| 0.1666666667 |
| 0.1666666667 |
| 1            |
| 1            |
| 0.2869875223 |
| 1            |
| 1            |
| 1            |
| 1            |
| 1            |
| 1            |
| 1            |
| 1            |
| 0.25         |
| 0.1666666667 |
| 0.209972112  |
| 1            |
| 1            |
| 0.25         |
| 0.5          |
| 0.1666666667 |

|              |
|--------------|
| 0.166666667  |
| 1            |
| 0.5          |
| 0.25         |
| 0.25         |
| 0.25         |
| 0.6256684492 |
| 0.6256684492 |
| 1            |
| 1            |
| 1            |
| 0.6256684492 |
| 1            |
| 0.416666667  |
| 1            |
| 1            |
| 0.416666667  |
| 0.6256684492 |
| 0.6256684492 |
| 0.5588235294 |
| 0.416666667  |
| 1            |
| 0.6256684492 |
| 1            |
| 1            |
| 0.416666667  |
| 0.25         |
| 1            |
| 1            |
| 1            |
| 0.5588235294 |
| 1            |
| 1            |
| 1            |
| 1            |
| 1            |
| 1            |
| 0.25         |
| 0.416666667  |
| 0.416666667  |
| 1            |
| 0.166666667  |
| 0.166666667  |
| 1            |
| 0.416666667  |
| 0.6773654476 |
| 1            |
| 1            |
| 0.376114082  |
| 1            |
| 0.166666667  |



|              |
|--------------|
| 1            |
| 1            |
| 0.5          |
| 1            |
| 0.6256684492 |
| 0.6256684492 |
| 0.6256684492 |
| 0.6256684492 |
| 0.6256684492 |
| 0.6256684492 |
| 1            |
| 0.4166666667 |
| 0.25         |
| 1            |
| 1            |
| 1            |
| 1            |
| 1            |
| 1            |
| 0.4166666667 |
| 0.5588235294 |
| 1            |
| 1            |
| 1            |
| 1            |
| 0.5          |
| 1            |
| 0.6295677362 |
| 0.5          |
| 1            |
| 0.0637254902 |
| 1            |
| 0.376114082  |
| 1            |
| 1            |
| 0.4166666667 |
| 0.6256684492 |
| 0.376114082  |
| 0.4166666667 |
| 0.1666666667 |
| 1            |
| 0.376114082  |
| 1            |
| 1            |
| 1            |
| 0.5588235294 |
| 0.5588235294 |
| 0.6295677362 |
| 0.1666666667 |
| 1            |
| 1            |
| 0.376114082  |

|              |
|--------------|
| 0.376114082  |
| 0.061942959  |
| 0.6773654476 |
| 0.6256684492 |
| 1            |
| 1            |
| 1            |
| 1            |
| 1            |
| 0.1379790553 |
| 1            |
| 1            |
| 1            |
| 0.376114082  |
| 0.4166666667 |
| 0.4166666667 |
| 0.5588235294 |
| 1            |
| 1            |
| 1            |
| 0.4166666667 |
| 0.4166666667 |
| 1            |
| 0.4166666667 |
| 1            |
| 1            |
| 0.061942959  |
| 1            |
| 0.5588235294 |
| 1            |
| 1            |
| 1            |
| 1            |
| 0.6256684492 |
| 0.5588235294 |
| 0.5          |
| 0.1666666667 |
| 0.1666666667 |
| 1            |
| 0.5          |
| 0.4166666667 |
| 1            |
| 0.4166666667 |
| 1            |
| 0.5588235294 |
| 1            |
| 1            |
| 1            |
| 0.5          |
| 1            |
| 1            |

|              |
|--------------|
| 0.5          |
| 1            |
| 1            |
| 0.6773654476 |
| 0.4166666667 |
| 1            |
| 1            |
| 0.5588235294 |
| 1            |
| 1            |
| 1            |
| 1            |
| 1            |
| 1            |
| 0.5588235294 |
| 1            |
| 1            |
| 0.4166666667 |
| 1            |
| 1            |
| 0.1666666667 |
| 1            |
| 1            |
| 0.209972112  |
| 0.5          |
| 0.4166666667 |
| 0.4166666667 |
| 0.4166666667 |
| 1            |
| 1            |
| 1            |
| 1            |
| 0.6256684492 |
| 0.6256684492 |
| 0.25         |
| 1            |
| 0.1379790553 |
| 1            |
| 0.5          |
| 1            |
| 0.4166666667 |
| 0.4166666667 |
| 1            |
| 1            |
| 1            |
| 1            |
| 1            |
| 0.209972112  |
| 0.4166666667 |
| 0.4166666667 |
| 1            |

|              |
|--------------|
| 0.1379790553 |
| 0.6256684492 |
| 0.6256684492 |
| 0.4166666667 |
| 0.4166666667 |
| 0.1666666667 |
| 0.6256684492 |
| 0.4166666667 |
| 1            |
| 1            |
| 1            |
| 1            |
| 0.1379790553 |
| 1            |
| 1            |
| 1            |
| 0.5          |
| 0.4166666667 |
| 1            |
| 1            |
| 1            |
| 0.4166666667 |
| 1            |
| 1            |
| 1            |
| 0.5          |
| 1            |
| 0.5588235294 |
| 0.4166666667 |
| 1            |
| 0.5588235294 |
| 0.4166666667 |
| 1            |
| 1            |
| 0.376114082  |
| 0.5588235294 |
| 0.1666666667 |
| 0.6256684492 |
| 1            |
| 1            |
| 1            |
| 0.6256684492 |
| 1            |
| 1            |
| 1            |
| 1            |
| 1            |
| 0.2869875223 |
| 0.25         |
| 0.25         |
| 1            |

|               |
|---------------|
| 1             |
| 0.416666667   |
| 1             |
| 0.416666667   |
| 0.416666667   |
| 1             |
| 1             |
| 1             |
| 1             |
| 1             |
| 0.166666667   |
| 0.166666667   |
| 0.416666667   |
| 1             |
| 1             |
| 0.416666667   |
| 0.25          |
| 0.416666667   |
| 1             |
| 1             |
| 1             |
| 0.416666667   |
| 1             |
| 1             |
| 1             |
| 1             |
| 1             |
| 0.1379790553  |
| 1             |
| 0.03042881375 |
| 0.5588235294  |
| 1             |
| 0.5588235294  |
| 0.416666667   |
| 0.25          |
| 0.4178238744  |
| 0.416666667   |
| 1             |
| 0.6256684492  |
| 1             |
| 1             |
| 0.5588235294  |
| 0.166666667   |
| 1             |
| 1             |
| 1             |
| 0.166666667   |
| 0.2869875223  |
| 1             |
| 1             |

|              |
|--------------|
| 0.5588235294 |
| 0.5588235294 |
| 0.6256684492 |
| 0.376114082  |
| 1            |
| 1            |
| 0.1666666667 |
| 0.5          |
| 1            |
| 1            |
| 1            |
| 0.5588235294 |
| 0.5588235294 |
| 1            |
| 1            |
| 1            |
| 0.5588235294 |
| 1            |
| 0.6256684492 |
| 1            |
| 1            |
| 0.376114082  |
| 1            |
| 1            |
| 0.5588235294 |
| 1            |
| 0.1666666667 |
| 1            |
| 0.2869875223 |
| 0.1666666667 |
| 0.6256684492 |
| 0.4178238744 |
| 0.4178238744 |
| 0.4178238744 |
| 0.5588235294 |
| 1            |
| 1            |
| 0.4166666667 |
| 0.376114082  |
| 0.4166666667 |
| 0.376114082  |
| 1            |
| 1            |
| 0.25         |
| 0.4166666667 |
| 1            |
| 0.5588235294 |
| 1            |
| 0.25         |
| 0.2869875223 |
| 1            |



|              |
|--------------|
| 0.25         |
| 1            |
| 1            |
| 1            |
| 1            |
| 1            |
| 1            |
| 1            |
| 1            |
| 1            |
| 0.166666667  |
| 1            |
| 1            |
| 1            |
| 0.5588235294 |
| 0.416666667  |
| 1            |
| 0.25         |
| 1            |
| 1            |
| 1            |
| 0.5588235294 |
| 1            |
| 0.376114082  |
| 1            |
| 0.6256684492 |
| 0.6256684492 |
| 1            |
| 0.209972112  |
| 0.416666667  |
| 0.2357640397 |
| 0.2357640397 |
| 0.2357640397 |
| 0.416666667  |
| 0.416666667  |
| 0.6295677362 |
| 0.1379790553 |
| 0.2869875223 |
| 1            |
| 0.2357640397 |
| 0.416666667  |
| 0.416666667  |
| 1            |
| 0.6256684492 |
| 1            |
| 0.166666667  |
| 1            |
| 1            |
| 1            |
| 0.5588235294 |
| 0.5588235294 |
| 0.4178238744 |



|              |
|--------------|
| 1            |
| 0.376114082  |
| 0.1247771836 |
| 1            |
| 1            |
| 1            |
| 1            |
| 0.6256684492 |
| 0.5588235294 |
| 0.5          |
| 1            |
| 1            |
| 1            |
| 0.6256684492 |
| 0.4166666667 |
| 1            |
| 1            |
| 0.1379790553 |
| 1            |
| 1            |
| 1            |
| 0.1379790553 |
| 0.25         |
| 0.6256684492 |
| 0.6256684492 |
| 0.6256684492 |
| 1            |
| 0.5588235294 |
| 0.5588235294 |
| 0.6256684492 |
| 0.6256684492 |
| 1            |
| 1            |
| 1            |
| 1            |
| 1            |
| 1            |
| 1            |
| 1            |
| 1            |
| 1            |
| 1            |
| 1            |
| 1            |
| 1            |
| 1            |
| 1            |
| 1            |
| 1            |
| 1            |
| 1            |
| 0.5          |
| 1            |
| 1            |
| 0.376114082  |
| 0.5          |

|              |
|--------------|
| 1            |
| 0.4178238744 |
| 1            |
| 1            |
| 1            |
| 1            |
| 0.6256684492 |
| 0.4166666667 |
| 0.25         |
| 1            |
| 0.1379790553 |
| 1            |
| 0.6256684492 |
| 0.6256684492 |
| 0.4166666667 |
| 0.5588235294 |
| 1            |
| 1            |
| 0.6256684492 |
| 1            |
| 0.1666666667 |
| 0.1666666667 |
| 0.5588235294 |
| 0.5588235294 |
| 0.1247771836 |
| 0.1247771836 |
| 0.4166666667 |
| 0.25         |
| 1            |
| 1            |
| 1            |
| 0.4166666667 |
| 0.25         |
| 1            |
| 0.4166666667 |
| 0.4166666667 |
| 0.25         |
| 1            |
| 1            |
| 1            |
| 0.1666666667 |
| 0.6256684492 |
| 0.6256684492 |
| 1            |
| 1            |
| 1            |
| 1            |

|              |
|--------------|
| 0.416666667  |
| 1            |
| 1            |
| 1            |
| 0.166666667  |
| 1            |
| 1            |
| 0.166666667  |
| 0.416666667  |
| 1            |
| 1            |
| 1            |
| 1            |
| 0.416666667  |
| 1            |
| 1            |
| 1            |
| 0.6256684492 |
| 0.416666667  |
| 1            |
| 1            |
| 1            |
| 1            |
| 1            |
| 0.4178238744 |
| 0.416666667  |
| 0.4178238744 |
| 1            |
| 1            |
| 0.25         |
| 0.25         |
| 0.25         |
| 0.25         |
| 1            |
| 0.416666667  |
| 0.416666667  |
| 0.416666667  |
| 0.416666667  |
| 0.416666667  |
| 1            |
| 0.5          |
| 1            |
| 1            |
| 1            |
| 0.1379790553 |
| 1            |
| 0.1379790553 |
| 1            |
| 1            |
| 0.5588235294 |
| 1            |

|              |
|--------------|
| 1            |
| 1            |
| 1            |
| 0.4240540589 |
| 0.4240540589 |
| 0.4240540589 |
| 0.6256684492 |
| 0.6256684492 |
| 0.6256684492 |
| 0.25         |
| 0.25         |
| 0.25         |
| 0.25         |
| 0.4166666667 |
| 0.4166666667 |
| 0.1666666667 |
| 0.1666666667 |
| 0.0637254902 |
| 0.4166666667 |
| 0.4166666667 |
| 0.4166666667 |
| 0.4166666667 |
| 0.4166666667 |
| 1            |
| 1            |
| 1            |
| 1            |
| 1            |
| 0.4166666667 |
| 0.4166666667 |
| 0.4166666667 |
| 1            |
| 1            |
| 0.1379790553 |
| 0.6773654476 |
| 0.5588235294 |
| 1            |
| 1            |
| 1            |
| 1            |
| 1            |
| 1            |
| 1            |
| 0.4166666667 |
| 1            |
| 1            |
| 1            |
| 0.6256684492 |
| 1            |
| 1            |
| 0.25         |
| 0.25         |

|              |
|--------------|
| 0.25         |
| 0.416666667  |
| 0.416666667  |
| 0.416666667  |
| 1            |
| 1            |
| 0.1379790553 |
| 0.209972112  |
| 0.5588235294 |
| 0.5          |
| 0.5          |
| 0.5          |
| 0.5          |
| 0.5          |
| 0.5          |
| 0.5          |
| 1            |
| 0.209972112  |
| 1            |
| 1            |
| 0.166666667  |
| 0.416666667  |
| 0.25         |
| 1            |
| 1            |
| 1            |
| 1            |
| 1            |
| 1            |
| 0.376114082  |
| 1            |
| 0.6295677362 |
| 0.4178238744 |
| 0.4178238744 |
| 0.5588235294 |
| 1            |
| 1            |
| 0.5588235294 |
| 0.5588235294 |
| 1            |
| 1            |
| 0.5588235294 |
| 0.2869875223 |
| 1            |
| 1            |
| 0.6256684492 |
| 0.5588235294 |
| 1            |
| 1            |
| 0.416666667  |
| 0.6256684492 |

|              |
|--------------|
| 1            |
| 1            |
| 1            |
| 1            |
| 0.2869875223 |
| 0.1666666667 |
| 0.5588235294 |
| 1            |
| 0.6256684492 |
| 0.4166666667 |
| 0.4166666667 |
| 1            |
| 0.5          |
| 1            |
| 0.0637254902 |
| 1            |
| 1            |
| 0.6295677362 |
| 1            |
| 0.5          |
| 1            |
| 0.6773654476 |
| 0.6773654476 |
| 1            |
| 0.1666666667 |
| 0.25         |
| 0.6256684492 |
| 0.5588235294 |
| 0.5588235294 |
| 0.6773654476 |
| 1            |
| 1            |
| 0.5588235294 |
| 1            |
| 1            |
| 1            |
| 1            |
| 1            |
| 1            |
| 0.1666666667 |
| 0.25         |
| 1            |
| 1            |
| 1            |
| 1            |
| 1            |
| 0.061942959  |
| 0.061942959  |
| 0.5588235294 |
| 0.2869875223 |
| 0.4166666667 |
| 0.5          |

|               |
|---------------|
| 0.5           |
| 0.5           |
| 0.5           |
| 1             |
| 1             |
| 0.5588235294  |
| 0.209972112   |
| 1             |
| 0.4166666667  |
| 1             |
| 1             |
| 0.4166666667  |
| 0.4166666667  |
| 1             |
| 0.2869875223  |
| 0.4166666667  |
| 1             |
| 0.5588235294  |
| 0.4166666667  |
| 0.4166666667  |
| 1             |
| 1             |
| 1             |
| 1             |
| 1             |
| 1             |
| 1             |
| 1             |
| 1             |
| 1             |
| 1             |
| 1             |
| 1             |
| 1             |
| 1             |
| 1             |
| 1             |
| 0.4166666667  |
| 1             |
| 0.03042881375 |
| 1             |
| 0.4166666667  |
| 0.5588235294  |
| 1             |
| 0.4166666667  |
| 0.1666666667  |
| 1             |
| 1             |
| 0.5588235294  |
| 0.1666666667  |
| 1             |
| 1             |
| 1             |
| 0.4166666667  |
| 1             |

|              |
|--------------|
| 1            |
| 1            |
| 1            |
| 0.25         |
| 0.5588235294 |
| 0.6256684492 |
| 1            |
| 1            |
| 1            |
| 1            |
| 1            |
| 1            |
| 1            |
| 1            |
| 1            |
| 0.5588235294 |
| 0.5          |
| 1            |
| 1            |
| 1            |
| 1            |
| 1            |
| 0.6256684492 |
| 0.6256684492 |
| 1            |
| 0.2869875223 |
| 0.1247771836 |
| 0.4166666667 |
| 0.4166666667 |
| 1            |
| 0.5588235294 |
| 0.5588235294 |
| 0.5          |
| 0.5          |
| 0.5          |
| 1            |
| 1            |
| 0.4166666667 |
| 0.5          |
| 0.4166666667 |
| 0.4166666667 |
| 0.5588235294 |
| 0.5588235294 |
| 1            |
| 1            |
| 0.376114082  |
| 1            |
| 0.25         |
| 0.4166666667 |
| 0.4166666667 |
| 0.1666666667 |
| 0.4166666667 |



|               |
|---------------|
| 0.416666667   |
| 0.416666667   |
| 0.416666667   |
| 0.416666667   |
| 0.416666667   |
| 1             |
| 0.5           |
| 1             |
| 1             |
| 0.416666667   |
| 0.166666667   |
| 0.416666667   |
| 1             |
| 1             |
| 1             |
| 0.6773654476  |
| 0.6773654476  |
| 1             |
| 1             |
| 1             |
| 0.5588235294  |
| 0.5588235294  |
| 0.416666667   |
| 0.166666667   |
| 1             |
| 1             |
| 1             |
| 0.6256684492  |
| 1             |
| 1             |
| 0.6256684492  |
| 0.3666803232  |
| 0.03042881375 |
| 1             |
| 1             |
| 0.376114082   |
| 0.5588235294  |
| 1             |
| 1             |
| 1             |
| 1             |
| 0.416666667   |
| 0.25          |
| 0.25          |
| 1             |
| 0.5           |
| 1             |
| 1             |
| 1             |
| 1             |
| 1             |
| 1             |



|              |
|--------------|
| 0.416666667  |
| 1            |
| 1            |
| 1            |
| 1            |
| 1            |
| 0.6295677362 |
| 0.6773654476 |
| 1            |
| 0.2869875223 |
| 0.416666667  |
| 1            |
| 1            |
| 1            |
| 1            |
| 0.209972112  |
| 0.209972112  |
| 1            |
| 0.6256684492 |
| 1            |
| 1            |
| 0.6256684492 |
| 0.6256684492 |
| 0.3666803232 |
| 0.416666667  |
| 1            |
| 0.376114082  |
| 1            |
| 0.166666667  |
| 1            |
| 1            |
| 1            |
| 1            |
| 1            |
| 0.5          |
| 1            |
| 0.25         |
| 0.25         |
| 0.25         |
| 1            |
| 1            |
| 1            |
| 1            |
| 1            |
| 1            |
| 1            |
| 0.209972112  |
| 1            |
| 1            |
| 1            |
| 1            |
| 1            |

|              |
|--------------|
| 0.416666667  |
| 0.416666667  |
| 1            |
| 1            |
| 1            |
| 1            |
| 1            |
| 1            |
| 1            |
| 1            |
| 1            |
| 0.5          |
| 1            |
| 1            |
| 1            |
| 1            |
| 0.5588235294 |
| 0.2869875223 |
| 1            |
| 0.5          |
| 0.6295677362 |
| 0.25         |
| 1            |
| 1            |
| 0.5588235294 |
| 1            |
| 0.416666667  |
| 0.416666667  |
| 0.416666667  |
| 1            |
| 1            |
| 0.416666667  |
| 1            |
| 1            |
| 1            |
| 1            |
| 0.2869875223 |
| 0.2869875223 |
| 1            |
| 1            |
| 1            |
| 0.5588235294 |
| 1            |
| 0.25         |
| 0.2869875223 |
| 0.2869875223 |
| 0.1379790553 |
| 1            |
| 1            |
| 1            |
| 1            |

|              |
|--------------|
| 1            |
| 1            |
| 1            |
| 1            |
| 1            |
| 0.2869875223 |
| 1            |
| 0.25         |
| 1            |
| 1            |
| 1            |
| 1            |
| 0.5          |
| 1            |
| 0.6256684492 |
| 0.6256684492 |
| 1            |
| 0.376114082  |
| 0.6256684492 |
| 1            |
| 0.6773654476 |
| 0.6773654476 |
| 0.6256684492 |
| 0.061942959  |
| 0.061942959  |
| 0.6295677362 |
| 0.5588235294 |
| 0.25         |
| 1            |
| 1            |
| 0.4166666667 |
| 0.4166666667 |
| 0.5588235294 |
| 1            |
| 1            |
| 0.1666666667 |
| 1            |
| 0.4166666667 |
| 1            |
| 0.6256684492 |
| 1            |
| 1            |
| 1            |
| 1            |
| 0.209972112  |
| 1            |
| 1            |
| 1            |
| 1            |
| 0.1247771836 |
| 1            |

|              |
|--------------|
| 1            |
| 1            |
| 1            |
| 0.5          |
| 0.5          |
| 0.25         |
| 1            |
| 1            |
| 1            |
| 1            |
| 1            |
| 0.25         |
| 0.5          |
| 0.25         |
| 1            |
| 1            |
| 1            |
| 1            |
| 1            |
| 0.6256684492 |
| 1            |
| 1            |
| 1            |
| 1            |
| 1            |
| 1            |
| 1            |
| 1            |
| 0.6256684492 |
| 0.6256684492 |
| 1            |
| 1            |
| 0.4166666667 |
| 0.4178238744 |
| 0.5588235294 |
| 1            |
| 1            |
| 0.1666666667 |
| 0.1666666667 |
| 0.2869875223 |
| 0.25         |
| 0.1666666667 |
| 0.4166666667 |
| 0.4166666667 |
| 0.4166666667 |
| 0.4166666667 |
| 0.4166666667 |
| 0.4166666667 |
| 1            |
| 0.4166666667 |
| 0.4166666667 |
| 0.4166666667 |
| 0.4166666667 |

|              |
|--------------|
| 0.416666667  |
| 0.416666667  |
| 0.416666667  |
| 1            |
| 0.416666667  |
| 0.416666667  |
| 0.416666667  |
| 0.416666667  |
| 0.416666667  |
| 0.5          |
| 0.6256684492 |
| 0.376114082  |
| 1            |
| 1            |
| 0.5          |
| 1            |
| 1            |
| 1            |
| 0.6256684492 |
| 0.416666667  |
| 1            |
| 0.376114082  |
| 0.416666667  |
| 0.416666667  |
| 1            |
| 1            |
| 0.6295677362 |
| 0.6295677362 |
| 0.25         |
| 0.5588235294 |
| 1            |
| 1            |
| 1            |
| 0.416666667  |
| 0.416666667  |
| 1            |
| 0.6256684492 |
| 1            |
| 1            |
| 0.416666667  |
| 0.416666667  |
| 1            |
| 0.416666667  |
| 1            |
| 0.25         |
| 1            |
| 1            |
| 0.6256684492 |
| 1            |
| 0.25         |
| 1            |





|              |
|--------------|
| 1            |
| 1            |
| 1            |
| 1            |
| 1            |
| 1            |
| 1            |
| 1            |
| 1            |
| 1            |
| 1            |
| 1            |
| 1            |
| 1            |
| 1            |
| 1            |
| 0.416666667  |
| 1            |
| 1            |
| 1            |
| 1            |
| 1            |
| 0.6295677362 |
| 1            |
| 0.6295677362 |
| 0.5588235294 |
| 1            |
| 0.5          |
| 0.6295677362 |
| 0.416666667  |
| 1            |
| 0.6256684492 |
| 1            |
| 1            |
| 0.6256684492 |
| 1            |
| 0.416666667  |
| 0.376114082  |
| 1            |
| 0.416666667  |
| 0.5          |
| 1            |
| 0.5588235294 |
| 0.5588235294 |
| 1            |
| 0.6295677362 |
| 1            |
| 0.209972112  |
| 1            |
| 0.6773654476 |
| 1            |
| 1            |
| 0.416666667  |

|              |
|--------------|
| 0.416666667  |
| 1            |
| 1            |
| 1            |
| 0.5588235294 |
| 0.5588235294 |
| 1            |
| 0.6256684492 |
| 1            |
| 0.2869875223 |
| 0.2869875223 |
| 0.2869875223 |
| 0.2869875223 |
| 0.2869875223 |
| 0.416666667  |
| 0.6256684492 |
| 1            |
| 1            |
| 0.6256684492 |
| 1            |
| 0.25         |
| 0.25         |
| 1            |
| 0.25         |
| 1            |
| 1            |
| 0.416666667  |
| 0.5          |
| 0.5          |
| 1            |
| 0.5588235294 |
| 0.1379790553 |
| 0.6256684492 |
| 1            |
| 0.416666667  |
| 1            |
| 0.376114082  |
| 0.416666667  |
| 0.416666667  |
| 1            |
| 1            |
| 1            |
| 1            |
| 1            |
| 1            |
| 1            |
| 0.6256684492 |
| 1            |
| 1            |
| 1            |
| 1            |
| 0.376114082  |

|              |
|--------------|
| 1            |
| 1            |
| 1            |
| 0.2869875223 |
| 1            |
| 1            |
| 1            |
| 0.4166666667 |
| 0.1666666667 |
| 0.376114082  |
| 0.5588235294 |
| 0.6256684492 |
| 1            |
| 0.4240540589 |
| 0.4240540589 |
| 0.4240540589 |
| 0.4166666667 |
| 0.4166666667 |
| 1            |
| 0.4166666667 |
| 1            |
| 0.6256684492 |
| 1            |
| 0.6256684492 |
| 1            |
| 1            |
| 0.5588235294 |
| 0.6256684492 |
| 0.4166666667 |
| 0.4166666667 |
| 0.4166666667 |
| 0.1666666667 |
| 0.5          |
| 1            |
| 1            |
| 1            |
| 1            |
| 1            |
| 0.4166666667 |
| 0.5588235294 |
| 1            |
| 0.2869875223 |
| 1            |
| 0.5588235294 |
| 1            |
| 1            |
| 0.6256684492 |
| 1            |
| 1            |
| 1            |
| 1            |

|              |
|--------------|
| 1            |
| 1            |
| 1            |
| 0.5          |
| 1            |
| 0.209972112  |
| 1            |
| 1            |
| 1            |
| 0.166666667  |
| 0.25         |
| 0.2869875223 |
| 0.416666667  |
| 0.166666667  |
| 1            |
| 0.166666667  |
| 1            |
| 0.6256684492 |
| 0.2869875223 |
| 1            |
| 0.25         |
| 1            |
| 1            |
| 0.416666667  |
| 1            |
| 0.5588235294 |
| 1            |
| 1            |
| 0.6256684492 |
| 0.5          |
| 0.5588235294 |
| 0.5588235294 |
| 0.25         |
| 1            |
| 0.5588235294 |
| 1            |
| 0.6295677362 |
| 1            |
| 1            |
| 1            |
| 0.5          |
| 1            |
| 1            |
| 0.416666667  |
| 0.416666667  |
| 1            |
| 1            |
| 1            |
| 1            |
| 1            |
| 1            |

|              |
|--------------|
| 1            |
| 1            |
| 1            |
| 1            |
| 1            |
| 1            |
| 1            |
| 1            |
| 1            |
| 1            |
| 1            |
| 1            |
| 1            |
| 1            |
| 0.6295677362 |
| 1            |
| 0.6773654476 |
| 0.4178238744 |
| 1            |
| 1            |
| 0.4166666667 |
| 1            |
| 0.5588235294 |
| 1            |
| 1            |
| 1            |
| 1            |
| 0.25         |
| 1            |
| 1            |
| 0.5          |
| 0.5          |
| 0.5          |
| 0.5          |
| 0.5          |
| 0.209972112  |
| 0.209972112  |
| 0.1666666667 |
| 0.4166666667 |
| 1            |
| 1            |
| 0.5588235294 |
| 1            |
| 0.1666666667 |
| 0.1666666667 |
| 0.2869875223 |
| 0.1379790553 |
| 0.376114082  |
| 0.376114082  |
| 0.4166666667 |
| 0.6256684492 |
| 1            |

|              |
|--------------|
| 0.6256684492 |
| 0.6256684492 |
| 0.5          |
| 1            |
| 1            |
| 0.6256684492 |
| 0.1666666667 |
| 0.1666666667 |
| 0.4166666667 |
| 0.5588235294 |
| 1            |
| 0.5588235294 |
| 1            |
| 1            |
| 1            |
| 1            |
| 0.6256684492 |
| 0.376114082  |
| 1            |
| 0.25         |
| 0.25         |
| 0.6256684492 |
| 0.25         |
| 1            |
| 1            |
| 0.4166666667 |
| 1            |
| 1            |
| 0.6256684492 |
| 0.1666666667 |
| 0.1666666667 |
| 0.4166666667 |
| 1            |
| 1            |
| 0.209972112  |
| 0.209972112  |
| 1            |
| 0.25         |
| 0.5          |
| 0.5          |
| 0.5          |
| 1            |
| 1            |
| 0.6256684492 |
| 1            |
| 1            |
| 0.1666666667 |
| 0.5588235294 |
| 0.5588235294 |
| 0.5          |
| 1            |

|              |
|--------------|
| 1            |
| 1            |
| 0.5          |
| 0.25         |
| 0.25         |
| 1            |
| 1            |
| 0.5          |
| 1            |
| 0.6256684492 |
| 0.6256684492 |
| 0.6256684492 |
| 1            |
| 1            |
| 1            |
| 1            |
| 1            |
| 1            |
| 1            |
| 1            |
| 1            |
| 1            |
| 1            |
| 1            |
| 0.6256684492 |
| 0.6256684492 |
| 0.1666666667 |
| 0.1666666667 |
| 0.4166666667 |
| 0.4166666667 |
| 0.6773654476 |
| 0.4178238744 |
| 0.5588235294 |
| 0.5588235294 |
| 1            |
| 1            |
| 0.5588235294 |
| 0.1666666667 |
| 0.1666666667 |
| 0.1666666667 |
| 1            |
| 0.5          |
| 0.5          |
| 1            |
| 1            |
| 0.6256684492 |
| 0.376114082  |
| 0.6256684492 |
| 1            |
| 1            |

|              |
|--------------|
| 1            |
| 1            |
| 1            |
| 0.2869875223 |
| 0.2869875223 |
| 0.2869875223 |
| 1            |
| 1            |
| 0.5588235294 |
| 0.5588235294 |
| 0.5588235294 |
| 1            |
| 0.2869875223 |
| 0.2869875223 |
| 0.2869875223 |
| 0.2869875223 |
| 0.2869875223 |
| 0.209972112  |
| 1            |
| 1            |
| 1            |
| 1            |
| 1            |
| 1            |
| 0.0189649224 |
| 0.0189649224 |
| 0.0189649224 |
| 0.0189649224 |
| 0.1666666667 |
| 1            |
| 1            |
| 1            |
| 0.1666666667 |
| 0.1666666667 |
| 0.5          |
| 0.5          |
| 1            |
| 1            |
| 1            |
| 0.6773654476 |
| 0.5          |
| 0.2869875223 |
| 1            |
| 0.5588235294 |
| 1            |
| 0.376114082  |
| 1            |
| 1            |
| 1            |
| 0.4166666667 |
| 0.5          |



|              |
|--------------|
| 0.6256684492 |
| 1            |
| 1            |
| 0.4166666667 |
| 0.1666666667 |
| 0.5          |
| 1            |
| 0.2869875223 |
| 0.4166666667 |
| 1            |
| 1            |
| 1            |
| 0.4166666667 |
| 0.5588235294 |
| 1            |
| 0.5588235294 |
| 0.5          |
| 1            |
| 1            |
| 0.2869875223 |
| 0.5          |
| 1            |
| 0.25         |
| 0.5          |
| 1            |
| 1            |
| 0.4166666667 |
| 0.4166666667 |
| 1            |
| 1            |
| 0.209972112  |
| 1            |
| 0.4166666667 |
| 0.4166666667 |
| 1            |
| 1            |
| 1            |
| 1            |
| 0.6256684492 |
| 1            |
| 1            |
| 1            |
| 1            |
| 1            |
| 0.4166666667 |
| 0.5588235294 |
| 1            |
| 0.2869875223 |
| 0.4166666667 |
| 1            |
| 0.5588235294 |



|              |
|--------------|
| 0.6256684492 |
| 0.5          |
| 0.5          |
| 1            |
| 1            |
| 0.1666666667 |
| 1            |
| 1            |
| 0.2869875223 |
| 0.209972112  |
| 0.2869875223 |
| 0.209972112  |
| 0.4178238744 |
| 0.4178238744 |
| 0.4178238744 |
| 0.4178238744 |
| 0.4178238744 |
| 1            |
| 1            |
| 1            |
| 0.4166666667 |
| 1            |
| 0.5588235294 |
| 0.5588235294 |
| 1            |
| 0.1666666667 |
| 0.1666666667 |
| 0.1666666667 |
| 0.5588235294 |
| 1            |
| 1            |
| 0.5          |
| 0.4166666667 |
| 0.5588235294 |
| 1            |
| 1            |
| 1            |
| 0.4166666667 |
| 1            |
| 0.25         |
| 0.3666803232 |
| 1            |
| 1            |
| 1            |
| 1            |
| 1            |
| 1            |
| 1            |
| 0.5          |
| 0.5          |
| 0.6773654476 |

|              |
|--------------|
| 1            |
| 0.5          |
| 1            |
| 1            |
| 1            |
| 0.166666667  |
| 0.166666667  |
| 0.6256684492 |
| 0.5588235294 |
| 1            |
| 1            |
| 1            |
| 1            |
| 1            |
| 0.6256684492 |
| 1            |
| 1            |
| 0.376114082  |
| 1            |
| 1            |
| 1            |
| 0.416666667  |
| 0.209972112  |
| 1            |
| 0.5588235294 |
| 1            |
| 1            |
| 0.416666667  |
| 0.416666667  |
| 1            |
| 0.416666667  |
| 0.5          |
| 0.2869875223 |
| 0.376114082  |
| 0.166666667  |
| 0.5588235294 |
| 0.416666667  |
| 1            |
| 1            |
| 1            |
| 1            |
| 1            |
| 1            |
| 0.3666803232 |
| 0.166666667  |
| 0.166666667  |
| 1            |
| 1            |
| 1            |
| 0.5588235294 |
| 0.5588235294 |

|              |
|--------------|
| 1            |
| 0.5          |
| 0.6773654476 |
| 0.4166666667 |
| 0.6256684492 |
| 0.25         |
| 0.5588235294 |
| 0.4166666667 |
| 0.25         |
| 1            |
| 0.1666666667 |
| 0.6256684492 |
| 0.6256684492 |
| 0.6256684492 |
| 0.4166666667 |
| 1            |
| 1            |
| 1            |
| 1            |
| 1            |
| 0.4166666667 |
| 1            |
| 1            |
| 0.4166666667 |
| 1            |
| 0.6295677362 |
| 0.4166666667 |
| 1            |
| 0.4166666667 |
| 0.5          |
| 1            |
| 0.5          |
| 1            |
| 1            |
| 0.5588235294 |
| 0.5588235294 |
| 0.2869875223 |
| 1            |
| 0.1666666667 |
| 0.4166666667 |
| 0.5588235294 |
| 0.25         |
| 1            |
| 1            |
| 1            |
| 1            |
| 1            |
| 0.1666666667 |
| 1            |
| 0.25         |
| 0.4166666667 |

|              |
|--------------|
| 1            |
| 0.1379790553 |
| 0.4166666667 |
| 1            |
| 1            |
| 0.5588235294 |
| 1            |
| 1            |
| 1            |
| 0.1379790553 |
| 1            |
| 0.5          |
| 0.5          |
| 0.5          |
| 0.4166666667 |
| 0.1379790553 |
| 1            |
| 1            |
| 0.0637254902 |
| 0.5588235294 |
| 0.1666666667 |
| 1            |
| 1            |
| 0.25         |
| 0.25         |
| 0.25         |
| 0.5588235294 |
| 0.6256684492 |
| 1            |
| 1            |
| 0.4166666667 |
| 0.4178238744 |
| 1            |
| 1            |
| 1            |
| 1            |
| 1            |
| 1            |
| 0.2869875223 |
| 1            |
| 1            |
| 0.2869875223 |
| 0.4166666667 |
| 1            |
| 0.25         |
| 0.1379790553 |
| 0.2869875223 |
| 1            |
| 1            |
| 1            |
| 0.6256684492 |

|              |
|--------------|
| 1            |
| 0.25         |
| 1            |
| 1            |
| 1            |
| 1            |
| 1            |
| 0.416666667  |
| 1            |
| 0.166666667  |
| 0.166666667  |
| 0.416666667  |
| 1            |
| 1            |
| 1            |
| 0.5          |
| 0.1379790553 |
| 1            |
| 0.416666667  |
| 0.1379790553 |
| 0.166666667  |
| 1            |
| 0.416666667  |
| 0.166666667  |
| 1            |
| 1            |
| 0.5588235294 |
| 1            |
| 0.5          |
| 1            |
| 0.25         |
| 0.416666667  |
| 0.25         |
| 1            |
| 0.376114082  |
| 1            |
| 0.5588235294 |
| 0.416666667  |
| 0.416666667  |
| 1            |
| 0.25         |
| 1            |
| 1            |
| 0.1247771836 |
| 1            |
| 1            |
| 1            |
| 0.25         |
| 1            |
| 0.376114082  |
| 0.7287727104 |

|              |
|--------------|
| 1            |
| 0.416666667  |
| 1            |
| 0.376114082  |
| 0.6256684492 |
| 0.5          |
| 0.2869875223 |
| 1            |
| 0.376114082  |
| 0.416666667  |
| 1            |
| 1            |
| 1            |
| 0.5588235294 |
| 0.209972112  |
| 1            |
| 1            |
| 0.166666667  |
| 0.5588235294 |
| 1            |
| 0.416666667  |
| 1            |
| 0.416666667  |
| 0.5588235294 |
| 0.166666667  |
| 0.166666667  |
| 1            |
| 0.5588235294 |
| 1            |
| 1            |
| 1            |
| 1            |
| 1            |
| 0.416666667  |
| 0.416666667  |
| 1            |
| 1            |
| 1            |
| 1            |
| 0.416666667  |
| 0.166666667  |
| 0.5          |
| 0.5          |
| 0.376114082  |
| 0.416666667  |
| 0.1379790553 |
| 1            |
| 0.166666667  |
| 1            |
| 1            |
| 1            |



|              |
|--------------|
| 0.209972112  |
| 1            |
| 1            |
| 0.376114082  |
| 0.5          |
| 0.5588235294 |
| 0.5588235294 |
| 0.5          |
| 0.416666667  |
| 1            |
| 1            |
| 0.416666667  |
| 0.5          |
| 1            |
| 1            |
| 1            |
| 1            |
| 1            |
| 1            |
| 1            |
| 1            |
| 0.25         |
| 1            |
| 1            |
| 1            |
| 1            |
| 1            |
| 1            |
| 1            |
| 1            |
| 0.416666667  |
| 1            |
| 1            |
| 0.416666667  |
| 0.5          |
| 1            |
| 0.5588235294 |
| 1            |
| 1            |
| 0.416666667  |
| 1            |
| 1            |
| 1            |
| 0.5588235294 |
| 0.6773654476 |
| 0.5588235294 |
| 0.1247771836 |
| 0.4178238744 |
| 0.5          |
| 0.416666667  |
| 1            |
| 1            |

|              |
|--------------|
| 0.5588235294 |
| 1            |
| 1            |
| 1            |
| 0.4166666667 |
| 0.6256684492 |
| 1            |
| 0.5          |
| 0.5588235294 |
| 0.5          |
| 1            |
| 1            |
| 0.5588235294 |
| 0.4166666667 |
| 1            |
| 0.5588235294 |
| 0.5588235294 |
| 0.209972112  |
| 1            |
| 0.25         |
| 1            |
| 1            |
| 1            |
| 0.4178238744 |
| 0.5588235294 |
| 1            |
| 1            |
| 1            |
| 0.4166666667 |
| 1            |
| 1            |
| 0.4166666667 |
| 0.2869875223 |
| 1            |
| 0.5          |
| 1            |
| 0.1666666667 |
| 1            |
| 1            |
| 1            |
| 1            |
| 0.6256684492 |
| 1            |
| 1            |
| 1            |
| 0.6256684492 |
| 1            |
| 0.6256684492 |
| 1            |
| 1            |
| 1            |



|              |
|--------------|
| 1            |
| 1            |
| 1            |
| 0.416666667  |
| 0.416666667  |
| 1            |
| 1            |
| 0.166666667  |
| 1            |
| 0.416666667  |
| 1            |
| 0.5          |
| 0.5          |
| 0.166666667  |
| 0.25         |
| 1            |
| 1            |
| 1            |
| 0.2869875223 |
| 1            |
| 1            |
| 1            |
| 1            |
| 1            |
| 1            |
| 1            |
| 1            |
| 1            |
| 0.376114082  |
| 1            |
| 0.5588235294 |
| 1            |
| 1            |
| 1            |
| 0.6256684492 |
| 0.416666667  |
| 0.166666667  |
| 1            |
| 1            |
| 0.6256684492 |
| 0.1379790553 |
| 0.416666667  |
| 1            |
| 0.416666667  |
| 0.416666667  |
| 1            |
| 1            |
| 1            |
| 0.416666667  |
| 1            |
| 1            |

|              |
|--------------|
| 0.6256684492 |
| 1            |
| 0.6256684492 |
| 1            |
| 0.25         |
| 0.5          |
| 1            |
| 0.5588235294 |
| 0.25         |
| 1            |
| 0.4166666667 |
| 0.4166666667 |
| 1            |
| 0.376114082  |
| 0.4166666667 |
| 0.376114082  |
| 1            |
| 1            |
| 1            |
| 1            |
| 0.4178238744 |
| 0.4166666667 |
| 0.4166666667 |
| 1            |
| 1            |
| 0.6256684492 |
| 0.6256684492 |
| 0.4166666667 |
| 0.4166666667 |
| 1            |
| 0.376114082  |
| 1            |
| 0.5588235294 |
| 1            |
| 1            |
| 0.376114082  |
| 0.1666666667 |
| 1            |
| 0.4166666667 |
| 0.4166666667 |
| 1            |
| 0.5588235294 |
| 0.5          |
| 1            |
| 0.376114082  |
| 0.376114082  |
| 0.376114082  |
| 0.376114082  |
| 0.4166666667 |
| 0.6256684492 |
| 0.4166666667 |

|              |
|--------------|
| 1            |
| 0.6256684492 |
| 0.5          |
| 1            |
| 0.1379790553 |
| 1            |
| 0.6256684492 |
| 0.1666666667 |
| 1            |
| 1            |
| 0.4166666667 |
| 0.1666666667 |
| 0.4166666667 |
| 1            |
| 1            |
| 0.5          |
| 1            |
| 0.6295677362 |
| 0.6256684492 |
| 1            |
| 1            |
| 0.5588235294 |
| 0.5588235294 |
| 0.061942959  |
| 1            |
| 1            |
| 0.376114082  |
| 1            |
| 0.5588235294 |
| 1            |
| 0.4166666667 |
| 1            |
| 1            |
| 0.376114082  |
| 1            |
| 0.5          |
| 0.2869875223 |
| 1            |
| 1            |
| 1            |
| 0.5          |
| 1            |
| 1            |
| 1            |
| 1            |
| 1            |
| 0.4166666667 |
| 0.4166666667 |
| 1            |
| 1            |
| 1            |

|              |
|--------------|
| 0.25         |
| 1            |
| 1            |
| 0.416666667  |
| 1            |
| 0.4240540589 |
| 0.5588235294 |
| 1            |
| 0.5588235294 |
| 0.6256684492 |
| 0.6256684492 |
| 0.6256684492 |
| 0.6256684492 |
| 0.6256684492 |
| 0.6256684492 |
| 0.1247771836 |
| 0.6256684492 |
| 0.6256684492 |
| 1            |
| 0.6256684492 |
| 0.6256684492 |
| 0.5588235294 |
| 1            |
| 1            |
| 1            |
| 1            |
| 0.6256684492 |
| 1            |
| 1            |
| 1            |
| 0.2869875223 |
| 1            |
| 0.5588235294 |
| 1            |
| 0.6256684492 |
| 0.166666667  |
| 0.166666667  |
| 1            |
| 0.6256684492 |
| 0.6256684492 |
| 0.6256684492 |
| 0.166666667  |
| 1            |
| 1            |
| 0.376114082  |
| 0.6773654476 |
| 1            |
| 0.6773654476 |
| 0.166666667  |
| 0.166666667  |
| 0.376114082  |

|              |
|--------------|
| 0.376114082  |
| 0.416666667  |
| 0.416666667  |
| 1            |
| 0.416666667  |
| 0.416666667  |
| 0.416666667  |
| 1            |
| 0.5          |
| 0.416666667  |
| 1            |
| 0.5588235294 |
| 1            |
| 0.6773654476 |
| 1            |
| 0.6773654476 |
| 1            |
| 1            |
| 0.376114082  |
| 1            |
| 1            |
| 0.416666667  |
| 1            |
| 0.1379790553 |
| 1            |
| 1            |
| 1            |
| 0.5          |
| 1            |
| 1            |
| 1            |
| 0.416666667  |
| 0.6256684492 |
| 0.1379790553 |
| 1            |
| 1            |
| 0.376114082  |
| 0.416666667  |
| 0.416666667  |
| 0.416666667  |
| 0.6256684492 |
| 1            |
| 1            |
| 1            |
| 1            |
| 0.1379790553 |
| 0.6256684492 |
| 1            |
| 0.166666667  |
| 0.166666667  |
| 0.6256684492 |



|              |
|--------------|
| 1            |
| 0.5588235294 |
| 1            |
| 1            |
| 0.5          |
| 1            |
| 1            |
| 1            |
| 0.4166666667 |
| 1            |
| 0.209972112  |
| 1            |
| 1            |
| 0.4166666667 |
| 1            |
| 0.376114082  |
| 1            |
| 1            |
| 0.25         |
| 1            |
| 1            |
| 0.4166666667 |
| 0.25         |
| 0.4166666667 |
| 1            |
| 1            |
| 0.1666666667 |
| 1            |
| 0.5          |
| 0.5          |
| 0.2869875223 |
| 0.4166666667 |
| 1            |
| 1            |
| 1            |
| 1            |
| 1            |
| 0.5588235294 |
| 0.5588235294 |
| 1            |
| 1            |
| 1            |
| 0.25         |
| 1            |
| 1            |
| 0.5          |
| 1            |
| 0.5588235294 |
| 0.5588235294 |
| 0.5588235294 |
| 1            |

|              |
|--------------|
| 1            |
| 1            |
| 1            |
| 0.416666667  |
| 0.416666667  |
| 1            |
| 1            |
| 0.25         |
| 1            |
| 1            |
| 1            |
| 1            |
| 1            |
| 0.6256684492 |
| 0.4178238744 |
| 1            |
| 1            |
| 1            |
| 0.6256684492 |
| 0.416666667  |
| 0.5          |
| 1            |
| 1            |
| 1            |
| 0.0637254902 |
| 1            |
| 1            |
| 0.416666667  |
| 0.416666667  |
| 0.6256684492 |
| 0.6256684492 |
| 0.416666667  |
| 0.6773654476 |
| 0.166666667  |
| 0.416666667  |
| 0.416666667  |
| 0.5          |
| 1            |
| 0.5588235294 |
| 1            |
| 0.416666667  |
| 0.5          |
| 1            |
| 1            |
| 1            |
| 0.4240540589 |
| 0.5588235294 |
| 0.0637254902 |
| 0.061942959  |
| 0.6256684492 |
| 1            |

|              |
|--------------|
| 0.6295677362 |
| 1            |
| 0.6256684492 |
| 1            |
| 0.25         |
| 0.1666666667 |
| 0.1379790553 |
| 1            |
| 0.5588235294 |
| 0.5588235294 |
| 0.5588235294 |
| 0.6256684492 |
| 1            |
| 1            |
| 1            |
| 0.4166666667 |
| 0.6256684492 |
| 0.5          |
| 1            |
| 1            |
| 1            |
| 1            |
| 1            |
| 1            |
| 0.4166666667 |
| 1            |
| 0.5588235294 |
| 0.4166666667 |
| 1            |
| 1            |
| 1            |
| 0.4166666667 |
| 0.4166666667 |
| 1            |
| 1            |
| 0.5          |
| 1            |
| 0.4166666667 |
| 1            |
| 0.6256684492 |
| 0.1379790553 |
| 1            |
| 0.25         |
| 0.6256684492 |
| 1            |
| 0.4166666667 |
| 0.4166666667 |
| 0.4166666667 |
| 1            |
| 1            |
| 1            |

|              |
|--------------|
| 0.5588235294 |
| 0.376114082  |
| 0.6256684492 |
| 0.5          |
| 0.5          |
| 0.5588235294 |
| 1            |
| 0.5588235294 |
| 1            |
| 1            |
| 1            |
| 0.5588235294 |
| 0.7287727104 |
| 1            |
| 1            |
| 1            |
| 0.25         |
| 1            |
| 0.5588235294 |
| 0.6773654476 |
| 0.6773654476 |
| 0.4178238744 |
| 1            |
| 0.4166666667 |
| 0.4178238744 |
| 1            |
| 0.5          |
| 1            |
| 1            |
| 1            |
| 0.3666803232 |
| 0.376114082  |
| 0.25         |
| 0.376114082  |
| 0.4166666667 |
| 0.5588235294 |
| 0.5588235294 |
| 1            |
| 0.4166666667 |
| 0.061942959  |
| 0.6295677362 |
| 0.376114082  |
| 0.376114082  |
| 0.4166666667 |
| 1            |
| 1            |
| 0.5588235294 |
| 0.25         |
| 1            |
| 0.4166666667 |
| 0.6256684492 |

|              |
|--------------|
| 1            |
| 0.6256684492 |
| 1            |
| 1            |
| 0.25         |
| 0.6256684492 |
| 0.6256684492 |
| 1            |
| 1            |
| 0.6256684492 |
| 0.6256684492 |
| 1            |
| 0.6256684492 |
| 1            |
| 1            |
| 1            |
| 0.209972112  |
| 0.1379790553 |
| 1            |
| 0.5          |
| 0.25         |
| 0.1379790553 |
| 0.6256684492 |
| 0.4166666667 |
| 0.1666666667 |
| 0.25         |
| 0.6256684492 |
| 1            |
| 1            |
| 0.4166666667 |
| 1            |
| 0.4166666667 |
| 0.25         |
| 1            |
| 0.376114082  |
| 0.4166666667 |
| 0.6295677362 |
| 1            |
| 1            |
| 0.376114082  |
| 0.6256684492 |
| 1            |
| 0.1666666667 |
| 0.4166666667 |
| 0.25         |
| 1            |
| 1            |
| 0.2869875223 |
| 1            |
| 0.5          |
| 0.5          |

|              |
|--------------|
| 0.416666667  |
| 1            |
| 0.166666667  |
| 0.6256684492 |
| 0.5          |
| 1            |
| 1            |
| 1            |
| 1            |
| 0.416666667  |
| 0.6256684492 |
| 0.6256684492 |
| 1            |
| 0.5          |
| 1            |
| 1            |
| 1            |
| 1            |
| 0.5588235294 |
| 1            |
| 1            |
| 0.376114082  |
| 1            |
| 1            |
| 0.416666667  |
| 0.25         |
| 1            |
| 1            |
| 1            |
| 1            |
| 1            |
| 0.6256684492 |
| 0.5588235294 |
| 0.6256684492 |
| 0.6256684492 |
| 0.6256684492 |
| 1            |
| 1            |
| 1            |
| 0.416666667  |
| 1            |
| 1            |
| 0.5          |
| 0.209972112  |
| 1            |
| 1            |
| 0.416666667  |
| 1            |
| 1            |
| 0.4178238744 |
| 1            |

|              |
|--------------|
| 0.1379790553 |
| 0.6256684492 |
| 0.4178238744 |
| 0.25         |
| 1            |
| 0.5          |
| 1            |
| 0.4166666667 |
| 0.6256684492 |
| 0.6256684492 |
| 0.6256684492 |
| 0.4166666667 |
| 1            |
| 0.25         |
| 1            |
| 1            |
| 1            |
| 1            |
| 1            |
| 0.5          |
| 0.5          |
| 1            |
| 1            |
| 1            |
| 1            |
| 1            |
| 1            |
| 1            |
| 1            |
| 1            |
| 1            |
| 1            |
| 1            |
| 0.25         |
| 1            |
| 0.4166666667 |
| 1            |
| 0.25         |
| 0.4166666667 |
| 0.5588235294 |
| 0.5588235294 |
| 0.5588235294 |
| 0.4166666667 |
| 0.376114082  |
| 1            |
| 1            |
| 0.5          |
| 0.1379790553 |
| 0.3666803232 |
| 0.2869875223 |
| 0.2869875223 |
| 1            |
| 1            |
| 1            |

|              |
|--------------|
| 1            |
| 0.5588235294 |
| 0.1379790553 |
| 0.209972112  |
| 0.2869875223 |
| 0.4166666667 |
| 0.4166666667 |
| 0.6256684492 |
| 0.6256684492 |
| 0.4166666667 |
| 1            |
| 0.6256684492 |
| 0.5588235294 |
| 0.5          |
| 1            |
| 1            |
| 0.4166666667 |
| 1            |
| 1            |
| 0.25         |
| 1            |
| 1            |
| 1            |
| 1            |
| 1            |
| 1            |
| 1            |
| 1            |
| 1            |
| 1            |
| 1            |
| 1            |
| 1            |
| 1            |
| 0.4166666667 |
| 1            |
| 0.4166666667 |
| 1            |
| 1            |
| 0.25         |
| 1            |
| 0.6256684492 |
| 0.6256684492 |
| 1            |
| 0.1666666667 |
| 1            |
| 0.2869875223 |
| 1            |
| 1            |
| 1            |
| 1            |
| 1            |
| 0.5588235294 |
| 0.5588235294 |



|              |
|--------------|
| 0.5588235294 |
| 1            |
| 0.25         |
| 0.25         |
| 1            |
| 0.5588235294 |
| 0.2869875223 |
| 0.4166666667 |
| 0.6256684492 |
| 1            |
| 0.209972112  |
| 0.4166666667 |
| 0.6256684492 |
| 0.376114082  |
| 0.376114082  |
| 0.6256684492 |
| 1            |
| 1            |
| 1            |
| 1            |
| 1            |
| 0.061942959  |
| 1            |
| 0.061942959  |
| 0.4166666667 |
| 0.5          |
| 0.6773654476 |
| 1            |
| 1            |
| 1            |
| 0.3666803232 |
| 0.5          |
| 0.4166666667 |
| 0.4166666667 |
| 1            |
| 1            |
| 1            |
| 0.6773654476 |
| 1            |
| 1            |
| 0.376114082  |
| 1            |
| 1            |
| 0.4166666667 |
| 0.4166666667 |
| 0.6256684492 |
| 0.2869875223 |
| 0.5          |
| 1            |
| 1            |
| 0.4166666667 |

|              |
|--------------|
| 0.5588235294 |
| 1            |
| 0.5588235294 |
| 1            |
| 0.209972112  |
| 1            |
| 1            |
| 0.209972112  |
| 1            |
| 1            |
| 1            |
| 0.5          |
| 0.25         |
| 0.6256684492 |
| 0.4166666667 |
| 1            |
| 1            |
| 1            |
| 0.4178238744 |
| 0.4166666667 |
| 1            |
| 0.1247771836 |
| 1            |
| 1            |
| 0.209972112  |
| 1            |
| 1            |
| 1            |
| 0.25         |
| 0.5588235294 |
| 1            |
| 0.4166666667 |
| 0.1379790553 |
| 0.2869875223 |
| 1            |
| 0.376114082  |
| 1            |
| 1            |
| 1            |
| 0.6256684492 |
| 1            |
| 1            |
| 1            |
| 1            |
| 1            |
| 1            |
| 1            |
| 1            |
| 1            |
| 0.4166666667 |
| 0.5          |

|              |
|--------------|
| 0.416666667  |
| 1            |
| 0.25         |
| 1            |
| 0.5588235294 |
| 0.5          |
| 1            |
| 1            |
| 0.25         |
| 1            |
| 0.416666667  |
| 1            |
| 1            |
| 0.376114082  |
| 1            |
| 1            |
| 0.416666667  |
| 1            |
| 1            |
| 0.166666667  |
| 0.166666667  |
| 1            |
| 1            |
| 1            |
| 0.166666667  |
| 1            |
| 1            |
| 0.2869875223 |
| 1            |
| 1            |
| 0.6256684492 |
| 1            |
| 1            |
| 0.25         |
| 0.6256684492 |
| 1            |
| 0.25         |
| 1            |
| 1            |
| 0.6256684492 |
| 1            |
| 0.166666667  |
| 0.416666667  |
| 1            |
| 0.2869875223 |
| 0.416666667  |
| 0.5          |
| 0.6256684492 |
| 0.376114082  |
| 1            |
| 0.416666667  |

|              |
|--------------|
| 0.5          |
| 0.416666667  |
| 0.416666667  |
| 0.416666667  |
| 0.416666667  |
| 0.5588235294 |
| 0.3666803232 |
| 1            |
| 1            |
| 0.1247771836 |
| 1            |
| 1            |
| 0.25         |
| 0.25         |
| 0.416666667  |
| 0.5588235294 |
| 1            |
| 1            |
| 1            |
| 1            |
| 0.6256684492 |
| 0.6295677362 |
| 0.6295677362 |
| 0.2869875223 |
| 1            |
| 0.6773654476 |
| 1            |
| 1            |
| 0.416666667  |
| 0.416666667  |
| 1            |
| 1            |
| 1            |
| 0.166666667  |
| 1            |
| 1            |
| 1            |
| 0.6256684492 |
| 0.25         |
| 0.1379790553 |
| 1            |
| 1            |
| 0.5588235294 |
| 1            |
| 0.4178238744 |
| 0.4178238744 |
| 0.166666667  |
| 0.5          |
| 1            |
| 0.376114082  |
| 0.166666667  |

|              |
|--------------|
| 1            |
| 1            |
| 1            |
| 1            |
| 1            |
| 1            |
| 1            |
| 0.25         |
| 1            |
| 0.5588235294 |
| 0.5588235294 |
| 0.25         |
| 0.5588235294 |
| 1            |
| 1            |
| 1            |
| 1            |
| 0.5          |
| 1            |
| 1            |
| 1            |
| 1            |
| 1            |
| 0.25         |
| 0.2869875223 |
| 1            |
| 0.25         |
| 0.6256684492 |
| 1            |
| 0.5588235294 |
| 1            |
| 0.4178238744 |
| 1            |
| 0.1247771836 |
| 1            |
| 1            |
| 1            |
| 1            |
| 1            |
| 1            |
| 1            |
| 1            |
| 1            |
| 1            |
| 1            |
| 1            |
| 1            |
| 0.25         |
| 0.25         |
| 0.25         |
| 0.25         |
| 0.6256684492 |



|              |
|--------------|
| 1            |
| 1            |
| 0.6256684492 |
| 1            |
| 1            |
| 1            |
| 1            |
| 1            |
| 1            |
| 1            |
| 1            |
| 1            |
| 1            |
| 1            |
| 1            |
| 1            |
| 1            |
| 1            |
| 1            |
| 1            |
| 1            |
| 0.25         |
| 0.25         |
| 1            |
| 0.25         |
| 0.5588235294 |
| 0.25         |
| 1            |
| 1            |
| 1            |
| 1            |
| 0.25         |
| 0.25         |
| 0.25         |
| 1            |
| 0.25         |
| 0.25         |
| 0.25         |
| 0.25         |
| 0.25         |
| 0.25         |
| 0.25         |
| 0.25         |
| 0.25         |
| 0.25         |
| 0.25         |
| 0.25         |
| 0.25         |
| 0.25         |
| 0.25         |
| 0.25         |
| 0.25         |
| 1            |
| 0.25         |
| 0.25         |
| 0.25         |
| 0.25         |

|              |
|--------------|
| 0.25         |
| 0.25         |
| 0.25         |
| 0.25         |
| 0.25         |
| 0.25         |
| 0.25         |
| 0.25         |
| 0.25         |
| 0.25         |
| 0.25         |
| 0.25         |
| 1            |
| 1            |
| 0.25         |
| 0.25         |
| 1            |
| 0.6256684492 |
| 0.1666666667 |
| 0.1666666667 |
| 0.1666666667 |
| 0.1666666667 |
| 1            |
| 1            |
| 0.4166666667 |
| 0.5          |
| 0.4166666667 |
| 1            |
| 1            |
| 1            |
| 0.4166666667 |
| 0.4166666667 |
| 0.5          |
| 0.4166666667 |
| 0.5          |
| 0.5          |
| 1            |
| 1            |
| 0.6295677362 |
| 1            |
| 1            |
| 0.6295677362 |
| 0.6295677362 |
| 1            |
| 0.2869875223 |
| 1            |
| 0.5          |
| 1            |
| 0.5          |
| 0.5          |
| 1            |







|              |
|--------------|
| 0.6256684492 |
| 0.6256684492 |
| 0.25         |
| 0.25         |
| 0.25         |
| 0.6256684492 |
| 1            |
| 1            |
| 0.6256684492 |
| 1            |
| 1            |
| 1            |
| 1            |
| 1            |
| 0.6256684492 |
| 0.6256684492 |
| 1            |
| 0.6256684492 |
| 1            |
| 0.4166666667 |
| 0.6256684492 |
| 0.6256684492 |
| 0.6256684492 |
| 1            |
| 1            |
| 1            |
| 1            |
| 0.5588235294 |
| 1            |
| 1            |
| 1            |
| 0.4166666667 |
| 0.4166666667 |
| 1            |
| 1            |
| 1            |
| 1            |
| 0.4166666667 |
| 1            |
| 0.5          |
| 0.6256684492 |
| 0.5588235294 |
| 0.5          |
| 1            |
| 1            |
| 1            |
| 0.4178238744 |
| 0.1379790553 |
| 1            |
| 0.1666666667 |
| 0.25         |

|              |
|--------------|
| 0.5588235294 |
| 1            |
| 1            |
| 1            |
| 0.6773654476 |
| 0.6773654476 |
| 0.4166666667 |
| 0.4166666667 |
| 1            |
| 1            |
| 0.5588235294 |
| 1            |
| 1            |
| 0.4166666667 |
| 1            |
| 0.4166666667 |
| 0.4166666667 |
| 1            |
| 1            |
| 1            |
| 1            |
| 1            |
| 1            |
| 0.6256684492 |
| 1            |
| 1            |
| 1            |
| 1            |
| 1            |
| 1            |
| 0.5588235294 |
| 0.4166666667 |
| 1            |
| 1            |
| 1            |
| 1            |
| 1            |
| 0.4166666667 |
| 1            |
| 1            |
| 0.25         |
| 0.1666666667 |
| 1            |
| 1            |
| 1            |
| 1            |
| 1            |
| 1            |
| 0.5588235294 |
| 1            |
| 0.4166666667 |

|              |
|--------------|
| 1            |
| 1            |
| 1            |
| 1            |
| 0.4166666667 |
| 1            |
| 1            |
| 1            |
| 1            |
| 0.376114082  |
| 1            |
| 0.1666666667 |
| 1            |
| 0.5588235294 |
| 0.1666666667 |
| 0.1666666667 |
| 1            |
| 1            |
| 0.5588235294 |
| 1            |
| 1            |
| 1            |
| 1            |
| 1            |
| 1            |
| 1            |
| 1            |
| 0.5588235294 |
| 0.5          |
| 1            |
| 0.376114082  |
| 1            |
| 1            |
| 1            |
| 0.5          |
| 1            |
| 0.6256684492 |
| 1            |
| 0.6773654476 |
| 0.4166666667 |
| 1            |
| 1            |
| 0.4166666667 |
| 0.1666666667 |
| 0.1247771836 |
| 0.6256684492 |
| 0.1666666667 |
| 0.1666666667 |
| 0.4166666667 |
| 0.1666666667 |
| 1            |

|              |
|--------------|
| 0.0637254902 |
| 0.4166666667 |
| 0.5588235294 |
| 0.5588235294 |
| 0.5588235294 |
| 0.5588235294 |
| 0.5588235294 |
| 1            |
| 1            |
| 0.1666666667 |
| 1            |
| 0.5588235294 |
| 1            |
| 1            |
| 0.5588235294 |
| 0.376114082  |
| 1            |
| 1            |
| 0.4166666667 |
| 0.6256684492 |
| 1            |
| 1            |
| 1            |
| 0.5          |
| 0.4166666667 |
| 1            |
| 1            |
| 1            |
| 1            |
| 1            |
| 1            |
| 0.6256684492 |
| 0.4166666667 |
| 1            |
| 1            |
| 0.376114082  |
| 0.4166666667 |
| 0.1666666667 |
| 1            |
| 0.4166666667 |
| 0.1666666667 |
| 0.1247771836 |
| 0.5          |
| 0.2869875223 |
| 1            |
| 1            |
| 1            |
| 0.25         |
| 0.4166666667 |
| 0.6773654476 |
| 1            |

|              |
|--------------|
| 0.5588235294 |
| 1            |
| 0.5588235294 |
| 1            |
| 0.6256684492 |
| 0.6256684492 |
| 1            |
| 0.209972112  |
| 0.6295677362 |
| 0.4166666667 |
| 0.6256684492 |
| 0.6295677362 |
| 1            |
| 1            |
| 1            |
| 1            |
| 1            |
| 0.4166666667 |
| 0.376114082  |
| 1            |
| 1            |
| 0.1247771836 |
| 0.2869875223 |
| 0.5588235294 |
| 1            |
| 1            |
| 1            |
| 1            |
| 1            |
| 1            |
| 1            |
| 1            |
| 1            |
| 1            |
| 1            |
| 1            |
| 0.4166666667 |
| 0.0637254902 |
| 0.0637254902 |
| 0.4166666667 |
| 1            |
| 0.5588235294 |
| 1            |
| 0.376114082  |
| 0.25         |
| 0.4166666667 |
| 1            |
| 1            |
| 1            |
| 0.4166666667 |
| 0.4166666667 |







|              |
|--------------|
| 1            |
| 1            |
| 1            |
| 0.6256684492 |
| 0.6773654476 |
| 0.4178238744 |
| 1            |
| 0.5588235294 |
| 1            |
| 1            |
| 1            |
| 0.4178238744 |
| 0.376114082  |
| 0.376114082  |
| 0.4166666667 |
| 1            |
| 0.5588235294 |
| 0.25         |
| 1            |
| 1            |
| 0.6256684492 |
| 0.6256684492 |
| 1            |
| 0.25         |
| 1            |
| 1            |
| 1            |
| 1            |
| 0.4166666667 |
| 1            |
| 1            |
| 1            |
| 0.5          |
| 0.4166666667 |
| 0.6256684492 |
| 1            |
| 1            |
| 0.6256684492 |
| 0.4166666667 |
| 0.6256684492 |
| 0.6256684492 |
| 1            |
| 1            |
| 0.6256684492 |
| 0.6256684492 |
| 1            |
| 0.4166666667 |
| 0.5          |
| 1            |
| 1            |
| 0.376114082  |
| 0.4166666667 |

|              |
|--------------|
| 1            |
| 0.166666667  |
| 0.5          |
| 0.416666667  |
| 1            |
| 1            |
| 0.5588235294 |
| 1            |
| 1            |
| 1            |
| 1            |
| 1            |
| 0.6256684492 |
| 0.416666667  |
| 1            |
| 0.25         |
| 0.416666667  |
| 1            |
| 0.5588235294 |
| 0.6773654476 |
| 1            |
| 1            |
| 0.2869875223 |
| 0.6256684492 |
| 0.2869875223 |
| 0.5588235294 |
| 0.166666667  |
| 0.3666803232 |
| 1            |
| 0.416666667  |
| 1            |
| 0.1379790553 |
| 0.6256684492 |
| 1            |
| 1            |
| 0.416666667  |
| 0.5588235294 |
| 1            |
| 0.166666667  |
| 0.5          |
| 0.5588235294 |
| 0.25         |
| 1            |
| 0.416666667  |
| 1            |
| 0.416666667  |
| 1            |
| 1            |
| 1            |
| 0.5588235294 |
| 0.5588235294 |

|              |
|--------------|
| 0.6256684492 |
| 1            |
| 0.376114082  |
| 1            |
| 1            |
| 1            |
| 0.6256684492 |
| 0.5588235294 |
| 0.1666666667 |
| 1            |
| 1            |
| 1            |
| 0.25         |
| 0.061942959  |
| 1            |
| 0.6256684492 |
| 1            |
| 0.6256684492 |
| 1            |
| 1            |
| 1            |
| 0.25         |
| 1            |
| 1            |
| 0.6256684492 |
| 0.4166666667 |
| 0.5588235294 |
| 1            |
| 0.4166666667 |
| 0.5588235294 |
| 0.5588235294 |
| 0.6256684492 |
| 0.6256684492 |
| 0.4166666667 |
| 1            |
| 1            |
| 0.1666666667 |
| 0.5588235294 |
| 1            |
| 1            |
| 0.4166666667 |
| 0.4166666667 |
| 0.4166666667 |
| 0.1379790553 |
| 0.1666666667 |
| 0.5588235294 |
| 0.6256684492 |
| 0.376114082  |
| 0.5588235294 |
| 0.1666666667 |
| 1            |

|              |
|--------------|
| 0.6256684492 |
| 1            |
| 1            |
| 0.5588235294 |
| 0.25         |
| 1            |
| 1            |
| 0.5588235294 |
| 0.376114082  |
| 0.376114082  |
| 1            |
| 1            |
| 1            |
| 1            |
| 1            |
| 0.25         |
| 1            |
| 1            |
| 0.25         |
| 1            |
| 0.5          |
| 0.5588235294 |
| 1            |
| 0.2869875223 |
| 0.1666666667 |
| 1            |
| 1            |
| 1            |
| 0.25         |
| 1            |
| 0.2869875223 |
| 1            |
| 0.4166666667 |
| 1            |
| 0.5          |
| 0.25         |
| 1            |
| 0.25         |
| 1            |
| 1            |
| 0.5588235294 |
| 1            |
| 1            |
| 1            |
| 1            |
| 0.6295677362 |
| 0.6295677362 |
| 0.209972112  |
| 0.5588235294 |
| 0.4166666667 |
| 0.4166666667 |

|              |
|--------------|
| 0.209972112  |
| 1            |
| 1            |
| 0.416666667  |
| 1            |
| 0.6773654476 |
| 0.5588235294 |
| 1            |
| 0.25         |
| 0.5588235294 |
| 0.5588235294 |
| 1            |
| 0.376114082  |
| 0.166666667  |
| 0.166666667  |
| 1            |
| 1            |
| 0.416666667  |
| 0.1379790553 |
| 1            |
| 1            |
| 1            |
| 0.2869875223 |
| 0.0637254902 |
| 0.416666667  |
| 1            |
| 0.166666667  |
| 1            |
| 1            |
| 1            |
| 1            |
| 1            |
| 0.5588235294 |
| 1            |
| 0.25         |
| 1            |
| 1            |
| 0.5          |
| 1            |
| 0.25         |
| 0.416666667  |
| 0.416666667  |
| 1            |
| 0.6256684492 |
| 1            |
| 1            |
| 0.5588235294 |
| 1            |
| 1            |
| 1            |
| 1            |

|              |
|--------------|
| 1            |
| 1            |
| 0.6773654476 |
| 0.25         |
| 1            |
| 1            |
| 1            |
| 0.376114082  |
| 0.5588235294 |
| 1            |
| 1            |
| 0.6256684492 |
| 1            |
| 0.5          |
| 0.5588235294 |
| 0.5588235294 |
| 0.4166666667 |
| 1            |
| 0.1247771836 |
| 0.5          |
| 1            |
| 1            |
| 1            |
| 1            |
| 0.6256684492 |
| 0.4166666667 |
| 1            |
| 1            |
| 0.25         |
| 0.5          |
| 1            |
| 0.2869875223 |
| 0.1379790553 |
| 0.25         |
| 1            |
| 0.6773654476 |
| 1            |
| 0.5588235294 |
| 1            |
| 0.6256684492 |
| 0.4166666667 |
| 0.4166666667 |
| 0.6256684492 |
| 1            |
| 0.25         |
| 0.061942959  |
| 0.5588235294 |
| 1            |
| 0.376114082  |
| 0.6256684492 |
| 0.4166666667 |

|              |
|--------------|
| 0.416666667  |
| 0.416666667  |
| 1            |
| 0.5588235294 |
| 0.5588235294 |
| 1            |
| 1            |
| 1            |
| 1            |
| 1            |
| 1            |
| 0.416666667  |
| 1            |
| 1            |
| 1            |
| 0.166666667  |
| 0.416666667  |
| 1            |
| 1            |
| 0.5588235294 |
| 0.5588235294 |
| 1            |
| 1            |
| 1            |
| 1            |
| 0.5          |
| 0.6256684492 |
| 1            |
| 0.376114082  |
| 0.416666667  |
| 1            |
| 1            |
| 1            |
| 0.25         |
| 1            |
| 0.5588235294 |
| 0.6256684492 |
| 0.5588235294 |
| 0.166666667  |
| 0.166666667  |
| 0.5588235294 |
| 1            |
| 0.5588235294 |
| 0.5588235294 |
| 0.416666667  |
| 0.2869875223 |
| 0.2869875223 |
| 0.416666667  |
| 0.6256684492 |
| 1            |
| 1            |



|              |
|--------------|
| 1            |
| 1            |
| 0.1666666667 |
| 0.209972112  |
| 0.1379790553 |
| 0.5          |
| 1            |
| 1            |
| 1            |
| 0.5          |
| 0.5          |
| 1            |
| 0.4166666667 |
| 0.25         |
| 1            |
| 0.4166666667 |
| 0.1666666667 |
| 1            |
| 1            |
| 1            |
| 1            |
| 0.6773654476 |
| 1            |
| 1            |
| 0.5588235294 |
| 1            |
| 1            |
| 1            |
| 1            |
| 0.2869875223 |
| 0.25         |
| 1            |
| 1            |
| 0.4166666667 |
| 0.4166666667 |
| 1            |
| 1            |
| 0.4166666667 |
| 0.376114082  |
| 0.6256684492 |
| 0.1666666667 |
| 0.5588235294 |
| 0.5588235294 |
| 0.5588235294 |
| 0.5588235294 |
| 0.5588235294 |
| 0.5588235294 |
| 0.6256684492 |
| 1            |
| 1            |
| 0.5588235294 |

|              |
|--------------|
| 0.5588235294 |
| 1            |
| 0.4166666667 |
| 1            |
| 1            |
| 0.5588235294 |
| 0.4166666667 |
| 0.25         |
| 0.4166666667 |
| 1            |
| 0.6295677362 |
| 0.376114082  |
| 1            |
| 0.4166666667 |
| 0.5588235294 |
| 0.5588235294 |
| 0.4166666667 |
| 1            |
| 1            |
| 1            |
| 1            |
| 0.25         |
| 0.4166666667 |
| 0.25         |
| 0.25         |
| 0.25         |
| 0.6773654476 |
| 0.6773654476 |
| 1            |
| 0.376114082  |
| 0.376114082  |
| 0.1666666667 |
| 0.4166666667 |
| 1            |
| 1            |
| 1            |
| 1            |
| 0.5588235294 |
| 1            |
| 1            |
| 0.25         |
| 0.5588235294 |
| 0.2869875223 |
| 0.4166666667 |
| 0.376114082  |
| 1            |
| 0.1666666667 |
| 1            |
| 0.5588235294 |
| 0.061942959  |
| 0.2869875223 |

|              |
|--------------|
| 1            |
| 0.416666667  |
| 0.2869875223 |
| 1            |
| 1            |
| 0.6256684492 |
| 0.416666667  |
| 0.416666667  |
| 0.5588235294 |
| 1            |
| 0.416666667  |
| 1            |
| 1            |
| 0.25         |
| 1            |
| 0.5588235294 |
| 0.416666667  |
| 0.166666667  |
| 0.376114082  |
| 1            |
| 0.6256684492 |
| 1            |
| 1            |
| 1            |
| 1            |
| 1            |
| 1            |
| 1            |
| 1            |
| 1            |
| 0.416666667  |
| 1            |
| 1            |
| 0.5588235294 |
| 1            |
| 1            |
| 0.5588235294 |
| 1            |
| 1            |
| 1            |
| 0.061942959  |
| 1            |
| 1            |
| 1            |
| 1            |
| 1            |
| 1            |
| 1            |
| 0.416666667  |
| 0.3666803232 |
| 1            |

|              |
|--------------|
| 1            |
| 0.4166666667 |
| 1            |
| 1            |
| 0.6773654476 |
| 1            |
| 0.5          |
| 1            |
| 1            |
| 0.25         |
| 1            |
| 0.5          |
| 0.1666666667 |
| 1            |
| 1            |
| 0.25         |
| 0.5          |
| 1            |
| 0.5588235294 |
| 1            |
| 1            |
| 0.4178238744 |
| 1            |
| 1            |
| 0.1666666667 |
| 0.5          |
| 1            |
| 1            |
| 0.6256684492 |
| 1            |
| 0.4166666667 |
| 0.2869875223 |
| 0.2869875223 |
| 1            |
| 1            |
| 0.6773654476 |
| 0.5588235294 |
| 0.6773654476 |
| 0.6773654476 |
| 0.5588235294 |
| 1            |
| 0.4166666667 |
| 1            |
| 0.061942959  |
| 0.061942959  |
| 0.061942959  |
| 0.061942959  |
| 0.5          |
| 0.5588235294 |
| 1            |
| 1            |

|              |
|--------------|
| 0.5          |
| 1            |
| 0.416666667  |
| 0.5588235294 |
| 1            |
| 1            |
| 0.0637254902 |
| 0.0637254902 |
| 0.6256684492 |
| 0.5          |
| 1            |
| 0.25         |
| 1            |
| 0.5588235294 |
| 1            |
| 1            |
| 1            |
| 1            |
| 1            |
| 1            |
| 1            |
| 1            |
| 1            |
| 0.5588235294 |
| 0.25         |
| 0.376114082  |
| 0.6295677362 |
| 1            |
| 0.2869875223 |
| 1            |
| 1            |
| 1            |
| 1            |
| 0.416666667  |
| 1            |
| 1            |
| 1            |
| 0.5          |
| 1            |
| 0.25         |
| 0.2869875223 |
| 1            |
| 0.6256684492 |
| 0.416666667  |
| 0.416666667  |
| 1            |
| 1            |
| 0.416666667  |
| 0.376114082  |
| 1            |
| 0.416666667  |

|              |
|--------------|
| 1            |
| 0.5588235294 |
| 0.6256684492 |
| 1            |
| 1            |
| 1            |
| 1            |
| 0.2869875223 |
| 1            |
| 1            |
| 1            |
| 0.6256684492 |
| 1            |
| 0.6256684492 |
| 1            |
| 1            |
| 0.376114082  |
| 1            |
| 0.1666666667 |
| 0.1379790553 |
| 1            |
| 1            |
| 0.6773654476 |
| 0.5588235294 |
| 0.6773654476 |
| 1            |
| 1            |
| 1            |
| 0.5588235294 |
| 1            |
| 1            |
| 0.6295677362 |
| 1            |
| 1            |
| 0.5588235294 |
| 0.5588235294 |
| 0.5588235294 |
| 1            |
| 0.2869875223 |
| 0.1666666667 |
| 1            |
| 1            |
| 1            |
| 1            |
| 1            |
| 0.6295677362 |
| 0.4240540589 |
| 0.4240540589 |
| 0.4240540589 |
| 1            |
| 1            |

|              |
|--------------|
| 0.416666667  |
| 0.416666667  |
| 1            |
| 1            |
| 1            |
| 0.416666667  |
| 0.416666667  |
| 0.416666667  |
| 1            |
| 1            |
| 0.25         |
| 1            |
| 1            |
| 0.416666667  |
| 0.416666667  |
| 1            |
| 0.5588235294 |
| 1            |
| 0.376114082  |
| 1            |
| 1            |
| 0.1379790553 |
| 0.1379790553 |
| 0.1379790553 |
| 0.416666667  |
| 1            |
| 1            |
| 0.416666667  |
| 0.5          |
| 0.416666667  |
| 1            |
| 1            |
| 0.166666667  |
| 1            |
| 0.5          |
| 0.376114082  |
| 1            |
| 1            |
| 1            |
| 1            |
| 0.4178238744 |
| 1            |
| 1            |
| 1            |
| 1            |
| 1            |
| 0.25         |
| 1            |
| 1            |
| 0.5588235294 |
| 0.1379790553 |

|              |
|--------------|
| 0.6256684492 |
| 0.6256684492 |
| 0.6256684492 |
| 0.6256684492 |
| 0.6256684492 |
| 1            |
| 0.6256684492 |
| 1            |
| 1            |
| 1            |
| 1            |
| 0.4166666667 |
| 1            |
| 1            |
| 0.6256684492 |
| 0.4166666667 |
| 1            |
| 1            |
| 1            |
| 0.4166666667 |
| 1            |
| 1            |
| 1            |
| 1            |
| 0.4166666667 |
| 0.25         |
| 0.25         |
| 1            |
| 1            |
| 1            |
| 0.4166666667 |
| 0.4166666667 |
| 0.6256684492 |
| 1            |
| 0.25         |
| 0.4166666667 |
| 0.1666666667 |
| 1            |
| 1            |
| 0.25         |
| 1            |
| 1            |
| 1            |
| 1            |
| 0.061942959  |
| 0.2869875223 |
| 0.4178238744 |
| 1            |
| 0.5          |
| 0.4166666667 |
| 0.6256684492 |



|              |
|--------------|
| 0.416666667  |
| 1            |
| 1            |
| 1            |
| 1            |
| 0.2869875223 |
| 1            |
| 0.5          |
| 1            |
| 1            |
| 1            |
| 1            |
| 0.6773654476 |
| 0.166666667  |
| 0.6773654476 |
| 0.416666667  |
| 0.5588235294 |
| 0.5588235294 |
| 0.5          |
| 1            |
| 0.5588235294 |
| 1            |
| 0.5588235294 |
| 0.061942959  |
| 0.376114082  |
| 0.5          |
| 0.5          |
| 1            |
| 0.5          |
| 0.416666667  |
| 0.376114082  |
| 0.376114082  |
| 1            |
| 0.416666667  |
| 1            |
| 1            |
| 0.5          |
| 0.5          |
| 0.4178238744 |
| 1            |
| 1            |
| 1            |
| 1            |
| 1            |
| 1            |
| 0.166666667  |
| 0.6256684492 |
| 1            |
| 1            |
| 1            |
| 0.166666667  |



|              |
|--------------|
| 0.416666667  |
| 0.416666667  |
| 0.5588235294 |
| 1            |
| 0.416666667  |
| 1            |
| 0.5          |
| 1            |
| 1            |
| 1            |
| 1            |
| 1            |
| 0.061942959  |
| 0.25         |
| 1            |
| 1            |
| 0.4178238744 |
| 0.1247771836 |
| 0.416666667  |
| 0.6773654476 |
| 0.6773654476 |
| 0.5          |
| 1            |
| 0.6256684492 |
| 0.5588235294 |
| 0.5588235294 |
| 0.5588235294 |
| 0.5588235294 |
| 0.5588235294 |
| 1            |
| 1            |
| 1            |
| 1            |
| 1            |
| 0.6256684492 |
| 1            |
| 0.416666667  |
| 1            |
| 1            |
| 0.416666667  |
| 0.6256684492 |
| 1            |
| 1            |
| 0.416666667  |
| 1            |
| 1            |
| 1            |
| 0.416666667  |
| 1            |
| 0.2869875223 |
| 0.5          |
| 0.5          |



|              |
|--------------|
| 0.376114082  |
| 1            |
| 0.1666666667 |
| 1            |
| 1            |
| 1            |
| 1            |
| 1            |
| 1            |
| 0.25         |
| 0.25         |
| 1            |
| 0.376114082  |
| 1            |
| 1            |
| 1            |
| 1            |
| 1            |
| 0.4166666667 |
| 1            |
| 0.4178238744 |
| 0.1666666667 |
| 1            |
| 1            |
| 0.1379790553 |
| 1            |
| 0.5588235294 |
| 0.25         |
| 1            |
| 1            |
| 1            |
| 0.5588235294 |
| 0.2869875223 |
| 0.25         |
| 1            |
| 1            |
| 1            |
| 0.6256684492 |
| 0.6256684492 |
| 0.6256684492 |
| 0.6256684492 |
| 0.209972112  |
| 0.209972112  |
| 0.1379790553 |
| 0.5588235294 |
| 1            |
| 1            |
| 1            |
| 0.1666666667 |
| 0.1379790553 |
| 0.6256684492 |

|              |
|--------------|
| 0.5588235294 |
| 0.0637254902 |
| 0.0637254902 |
| 1            |
| 1            |
| 0.1247771836 |
| 1            |
| 1            |
| 1            |
| 0.6256684492 |
| 1            |
| 1            |
| 1            |
| 1            |
| 1            |
| 0.5          |
| 0.5          |
| 1            |
| 0.6256684492 |
| 1            |
| 1            |
| 1            |
| 0.4166666667 |
| 0.5588235294 |
| 0.5588235294 |
| 0.5588235294 |
| 1            |
| 0.5588235294 |
| 0.5588235294 |
| 1            |
| 1            |
| 0.25         |
| 1            |
| 0.4166666667 |
| 0.4166666667 |
| 0.5588235294 |
| 1            |
| 0.4166666667 |
| 1            |
| 1            |
| 1            |
| 0.4166666667 |
| 1            |
| 1            |
| 1            |
| 1            |
| 1            |
| 1            |
| 0.376114082  |
| 0.4166666667 |
| 1            |

|              |
|--------------|
| 0.25         |
| 0.166666667  |
| 1            |
| 0.25         |
| 0.416666667  |
| 0.2869875223 |
| 0.6256684492 |
| 1            |
| 1            |
| 1            |
| 0.416666667  |
| 0.5          |
| 0.25         |
| 1            |
| 1            |
| 1            |
| 1            |
| 1            |
| 1            |
| 1            |
| 1            |
| 1            |
| 1            |
| 1            |
| 1            |
| 1            |
| 1            |
| 1            |
| 1            |
| 0.6256684492 |
| 1            |
| 0.1379790553 |
| 1            |
| 1            |
| 1            |
| 1            |
| 0.5          |
| 0.4178238744 |
| 1            |
| 0.6256684492 |
| 0.416666667  |
| 1            |
| 1            |
| 0.376114082  |
| 0.416666667  |
| 1            |
| 1            |
| 1            |
| 1            |
| 1            |
| 0.416666667  |
| 1            |
| 1            |

|              |
|--------------|
| 1            |
| 1            |
| 0.416666667  |
| 1            |
| 1            |
| 1            |
| 0.416666667  |
| 0.6256684492 |
| 0.5          |
| 0.376114082  |
| 1            |
| 1            |
| 1            |
| 1            |
| 1            |
| 0.5588235294 |
| 1            |
| 1            |
| 1            |
| 0.5588235294 |
| 1            |
| 0.2869875223 |
| 0.2869875223 |
| 1            |
| 1            |
| 0.6256684492 |
| 1            |
| 0.3666803232 |
| 1            |
| 1            |
| 0.5588235294 |
| 0.416666667  |
| 1            |
| 1            |
| 1            |
| 1            |
| 0.416666667  |
| 0.416666667  |
| 1            |
| 1            |
| 1            |
| 1            |
| 1            |
| 0.1379790553 |
| 1            |
| 1            |
| 1            |
| 0.6773654476 |
| 1            |
| 1            |
| 1            |



|              |
|--------------|
| 1            |
| 1            |
| 0.6256684492 |
| 1            |
| 1            |
| 1            |
| 1            |
| 0.209972112  |
| 1            |
| 1            |
| 1            |
| 0.6256684492 |
| 1            |
| 1            |
| 1            |
| 1            |
| 1            |
| 0.6295677362 |
| 1            |
| 0.5          |
| 1            |
| 0.6256684492 |
| 1            |
| 0.416666667  |
| 1            |
| 0.1379790553 |
| 0.5588235294 |
| 0.4178238744 |
| 1            |
| 0.416666667  |
| 1            |
| 0.5588235294 |
| 1            |
| 1            |
| 1            |
| 1            |
| 0.5588235294 |
| 0.1379790553 |
| 1            |
| 1            |
| 0.416666667  |
| 0.6295677362 |
| 0.166666667  |
| 0.5588235294 |
| 0.416666667  |
| 0.25         |
| 0.416666667  |
| 1            |
| 0.6256684492 |
| 1            |
| 0.5          |

|              |
|--------------|
| 1            |
| 0.416666667  |
| 0.5588235294 |
| 0.25         |
| 1            |
| 0.376114082  |
| 1            |
| 1            |
| 1            |
| 1            |
| 1            |
| 0.3666803232 |
| 1            |
| 1            |
| 1            |
| 1            |
| 0.416666667  |
| 0.5          |
| 0.6256684492 |
| 0.5588235294 |
| 1            |
| 1            |
| 0.6256684492 |
| 1            |
| 0.5588235294 |
| 0.25         |
| 1            |
| 1            |
| 0.25         |
| 1            |
| 0.5588235294 |
| 0.6773654476 |
| 0.6256684492 |
| 0.209972112  |
| 0.2869875223 |
| 0.5588235294 |
| 0.416666667  |
| 1            |
| 1            |
| 0.1379790553 |
| 0.5588235294 |
| 1            |
| 1            |
| 1            |
| 1            |
| 1            |
| 0.166666667  |
| 0.166666667  |
| 1            |
| 1            |
| 1            |

|              |
|--------------|
| 1            |
| 1            |
| 1            |
| 0.5588235294 |
| 1            |
| 0.061942959  |
| 1            |
| 0.4166666667 |
| 1            |
| 1            |
| 1            |
| 1            |
| 0.1666666667 |
| 0.1666666667 |
| 1            |
| 0.6256684492 |
| 1            |
| 1            |
| 1            |
| 0.6256684492 |
| 0.2869875223 |
| 1            |
| 1            |
| 0.25         |
| 0.376114082  |
| 1            |
| 1            |
| 0.25         |
| 1            |
| 1            |
| 0.25         |
| 0.4166666667 |
| 0.5          |
| 1            |
| 0.5588235294 |
| 0.5          |
| 1            |
| 0.1666666667 |
| 0.4166666667 |
| 1            |
| 1            |
| 1            |
| 0.4166666667 |
| 0.5          |
| 1            |
| 1            |
| 1            |
| 0.25         |
| 0.6256684492 |
| 1            |
| 1            |

|              |
|--------------|
| 0.5588235294 |
| 0.25         |
| 1            |
| 0.6256684492 |
| 1            |
| 0.6773654476 |
| 1            |
| 0.6256684492 |
| 0.6256684492 |
| 1            |
| 0.061942959  |
| 0.1379790553 |
| 1            |
| 0.4166666667 |
| 0.5          |
| 0.376114082  |
| 1            |
| 0.4166666667 |
| 1            |
| 1            |
| 0.4166666667 |
| 0.5588235294 |
| 0.4178238744 |
| 1            |
| 1            |
| 1            |
| 0.209972112  |
| 1            |
| 1            |
| 1            |
| 0.25         |
| 0.6773654476 |
| 1            |
| 0.4166666667 |
| 1            |
| 0.1666666667 |
| 0.4166666667 |
| 1            |
| 1            |
| 1            |
| 1            |
| 1            |
| 1            |
| 1            |
| 0.6256684492 |
| 1            |
| 1            |
| 0.1379790553 |
| 0.5588235294 |
| 1            |
| 1            |
| 0.25         |

|              |
|--------------|
| 1            |
| 1            |
| 1            |
| 1            |
| 0.6256684492 |
| 0.4166666667 |
| 0.4166666667 |
| 0.4166666667 |
| 1            |
| 1            |
| 1            |
| 1            |
| 1            |
| 0.1666666667 |
| 1            |
| 1            |
| 1            |
| 0.25         |
| 0.5588235294 |
| 1            |
| 0.25         |
| 0.4166666667 |
| 0.1666666667 |
| 1            |
| 0.6256684492 |
| 0.1666666667 |
| 1            |
| 1            |
| 1            |
| 1            |
| 1            |
| 1            |
| 1            |
| 1            |
| 1            |
| 1            |
| 1            |
| 1            |
| 1            |
| 1            |
| 0.5588235294 |
| 0.4166666667 |
| 0.0637254902 |
| 0.25         |
| 0.5588235294 |
| 1            |
| 1            |
| 1            |
| 0.1666666667 |
| 0.2869875223 |
| 0.4178238744 |
| 0.5          |

|              |
|--------------|
| 0.5588235294 |
| 0.5588235294 |
| 0.5588235294 |
| 0.1379790553 |
| 0.4166666667 |
| 0.5          |
| 0.5          |
| 1            |
| 0.376114082  |
| 0.6773654476 |
| 1            |
| 1            |
| 0.25         |
| 1            |
| 1            |
| 1            |
| 1            |
| 0.4166666667 |
| 1            |
| 1            |
| 0.1379790553 |
| 1            |
| 1            |
| 0.6256684492 |
| 0.4166666667 |
| 0.4166666667 |
| 0.6256684492 |
| 1            |
| 1            |
| 0.1666666667 |
| 1            |
| 1            |
| 1            |
| 0.5588235294 |
| 0.1666666667 |
| 0.4166666667 |
| 1            |
| 1            |
| 0.4166666667 |
| 1            |
| 0.1666666667 |
| 0.1666666667 |
| 0.2869875223 |
| 1            |
| 0.5          |
| 1            |
| 0.4166666667 |
| 0.5          |
| 0.5          |
| 1            |
| 1            |

|              |
|--------------|
| 1            |
| 0.6256684492 |
| 1            |
| 0.4166666667 |
| 1            |
| 0.376114082  |
| 1            |
| 1            |
| 0.2869875223 |
| 1            |
| 0.4166666667 |
| 0.25         |
| 0.25         |
| 0.5588235294 |
| 0.1666666667 |
| 0.4166666667 |
| 0.6256684492 |
| 0.4166666667 |
| 1            |
| 1            |
| 1            |
| 1            |
| 1            |
| 1            |
| 1            |
| 1            |
| 0.5588235294 |
| 0.5          |
| 0.3666803232 |
| 1            |
| 0.5          |
| 0.5          |
| 0.376114082  |
| 0.6256684492 |
| 0.6256684492 |
| 0.25         |
| 1            |
| 1            |
| 1            |
| 1            |
| 1            |
| 1            |
| 1            |
| 1            |
| 0.5          |
| 1            |
| 1            |
| 0.2869875223 |
| 0.2869875223 |
| 0.2869875223 |
| 0.5588235294 |
| 0.1247771836 |
| 1            |

|              |
|--------------|
| 1            |
| 0.4178238744 |
| 0.376114082  |
| 0.376114082  |
| 1            |
| 1            |
| 1            |
| 0.1666666667 |
| 1            |
| 1            |
| 0.1666666667 |
| 1            |
| 1            |
| 0.5588235294 |
| 1            |
| 1            |
| 1            |
| 1            |
| 1            |
| 1            |
| 1            |
| 1            |
| 0.4166666667 |
| 0.6256684492 |
| 0.4166666667 |
| 0.5          |
| 1            |
| 0.6256684492 |
| 0.6256684492 |
| 0.4178238744 |
| 1            |
| 1            |
| 0.4166666667 |
| 0.4166666667 |
| 0.1666666667 |
| 0.4166666667 |
| 0.376114082  |
| 0.5588235294 |
| 0.5          |
| 0.5          |
| 0.5          |
| 0.4166666667 |
| 0.6256684492 |
| 1            |
| 1            |
| 1            |
| 1            |
| 1            |
| 0.6256684492 |
| 0.6256684492 |
| 0.6256684492 |



|              |
|--------------|
| 0.6256684492 |
| 0.5588235294 |
| 0.1666666667 |
| 0.6773654476 |
| 0.5588235294 |
| 0.5588235294 |
| 1            |
| 1            |
| 0.1666666667 |
| 0.25         |
| 1            |
| 0.2869875223 |
| 1            |
| 0.5588235294 |
| 0.5588235294 |
| 0.5588235294 |
| 0.6773654476 |
| 0.5588235294 |
| 1            |
| 1            |
| 1            |
| 1            |
| 1            |
| 0.25         |
| 0.25         |
| 0.25         |
| 1            |
| 1            |
| 1            |
| 0.4166666667 |
| 0.6256684492 |
| 1            |
| 1            |
| 0.5          |
| 0.5          |
| 1            |
| 1            |
| 1            |
| 0.2869875223 |
| 1            |
| 0.4166666667 |
| 0.4166666667 |
| 1            |
| 1            |
| 1            |
| 1            |
| 1            |
| 0.4166666667 |
| 0.4166666667 |
| 0.4166666667 |
| 0.4166666667 |

|              |
|--------------|
| 0.416666667  |
| 1            |
| 1            |
| 1            |
| 0.5          |
| 1            |
| 1            |
| 1            |
| 0.416666667  |
| 0.061942959  |
| 1            |
| 1            |
| 0.166666667  |
| 0.416666667  |
| 0.416666667  |
| 0.6737806193 |
| 0.5588235294 |
| 0.5588235294 |
| 1            |
| 0.376114082  |
| 0.6256684492 |
| 0.6256684492 |
| 1            |
| 1            |
| 1            |
| 0.416666667  |
| 0.416666667  |
| 1            |
| 1            |
| 1            |
| 1            |
| 1            |
| 1            |
| 0.376114082  |
| 1            |
| 1            |
| 0.416666667  |
| 1            |
| 0.416666667  |
| 1            |
| 0.166666667  |
| 1            |
| 0.5588235294 |
| 0.5588235294 |
| 0.5588235294 |
| 0.5588235294 |
| 0.5588235294 |
| 0.6256684492 |
| 0.6256684492 |
| 1            |
| 1            |

|              |
|--------------|
| 0.416666667  |
| 1            |
| 1            |
| 0.6256684492 |
| 1            |
| 1            |
| 1            |
| 0.376114082  |
| 1            |
| 0.416666667  |
| 1            |
| 1            |
| 1            |
| 1            |
| 1            |
| 0.416666667  |
| 0.416666667  |
| 0.416666667  |
| 0.416666667  |
| 0.416666667  |
| 0.416666667  |
| 0.416666667  |
| 0.416666667  |
| 0.25         |
| 0.25         |
| 0.061942959  |
| 0.1379790553 |
| 1            |
| 0.25         |
| 1            |
| 0.25         |
| 0.25         |
| 0.4178238744 |
| 0.25         |
| 1            |
| 0.25         |
| 1            |
| 1            |
| 0.25         |
| 0.25         |
| 1            |
| 0.25         |
| 1            |
| 0.25         |
| 1            |
| 1            |
| 1            |
| 0.25         |
| 1            |
| 0.416666667  |
| 1            |
| 0.5588235294 |

|              |
|--------------|
| 0.1379790553 |
| 1            |
| 0.1379790553 |
| 1            |
| 1            |
| 1            |
| 0.5588235294 |
| 1            |
| 0.5588235294 |
| 1            |
| 1            |
| 0.25         |
| 0.2869875223 |
| 1            |
| 0.25         |
| 0.4166666667 |
| 0.5588235294 |
| 0.5588235294 |
| 1            |
| 1            |
| 0.5588235294 |
| 1            |
| 0.376114082  |
| 0.4166666667 |
| 1            |
| 0.1379790553 |
| 0.25         |
| 1            |
| 1            |
| 1            |
| 0.1666666667 |
| 1            |
| 1            |
| 1            |
| 1            |
| 1            |
| 0.4166666667 |
| 0.25         |
| 0.1666666667 |
| 0.5588235294 |
| 0.5588235294 |
| 1            |
| 1            |
| 1            |
| 1            |
| 1            |
| 0.5588235294 |
| 1            |
| 1            |
| 0.6773654476 |
| 0.376114082  |



|              |
|--------------|
| 0.25         |
| 0.416666667  |
| 0.416666667  |
| 1            |
| 0.416666667  |
| 0.416666667  |
| 0.25         |
| 1            |
| 1            |
| 0.416666667  |
| 0.166666667  |
| 0.416666667  |
| 0.416666667  |
| 1            |
| 1            |
| 1            |
| 0.6295677362 |
| 0.6256684492 |
| 0.5588235294 |
| 0.5          |
| 0.5          |
| 1            |
| 0.5          |
| 1            |
| 1            |
| 1            |
| 1            |
| 1            |
| 0.5          |
| 1            |
| 1            |
| 1            |
| 1            |
| 0.416666667  |
| 0.416666667  |
| 1            |
| 1            |
| 0.416666667  |
| 0.416666667  |
| 0.209972112  |
| 0.5          |
| 1            |
| 1            |
| 1            |
| 0.1247771836 |
| 0.166666667  |
| 0.6256684492 |
| 0.6295677362 |
| 0.416666667  |
| 1            |
| 0.416666667  |
| 1            |

|              |
|--------------|
| 0.5588235294 |
| 0.5588235294 |
| 0.25         |
| 1            |
| 0.5588235294 |
| 0.6256684492 |
| 1            |
| 0.4166666667 |
| 0.6256684492 |
| 1            |
| 0.1666666667 |
| 1            |
| 0.5588235294 |
| 0.2869875223 |
| 0.2869875223 |
| 0.2869875223 |
| 1            |
| 1            |
| 0.1666666667 |
| 0.6256684492 |
| 0.6256684492 |
| 0.4166666667 |
| 0.376114082  |
| 0.4166666667 |
| 0.6256684492 |
| 0.5588235294 |
| 1            |
| 1            |
| 1            |
| 1            |
| 0.5          |
| 1            |
| 1            |
| 1            |
| 0.376114082  |
| 1            |
| 0.25         |
| 0.25         |
| 0.4166666667 |
| 1            |
| 0.6773654476 |
| 1            |
| 1            |
| 0.25         |
| 0.4166666667 |
| 0.209972112  |
| 1            |
| 1            |
| 1            |
| 1            |
| 1            |





|              |
|--------------|
| 1            |
| 0.416666667  |
| 0.416666667  |
| 0.1247771836 |
| 1            |
| 1            |
| 0.2869875223 |
| 0.2869875223 |
| 0.166666667  |
| 0.5588235294 |
| 0.2869875223 |
| 0.416666667  |
| 1            |
| 1            |
| 0.6256684492 |
| 0.416666667  |
| 1            |
| 0.6256684492 |
| 1            |
| 1            |
| 1            |
| 0.416666667  |
| 0.166666667  |
| 0.416666667  |
| 1            |
| 1            |
| 0.5588235294 |
| 1            |
| 0.5          |
| 1            |
| 0.5588235294 |
| 1            |
| 1            |
| 0.25         |
| 0.6256684492 |
| 0.5588235294 |
| 1            |
| 1            |
| 1            |
| 1            |
| 1            |
| 1            |
| 0.5          |
| 1            |
| 0.061942959  |
| 0.25         |
| 0.3666803232 |
| 0.416666667  |
| 0.376114082  |
| 0.5          |
| 1            |



|              |
|--------------|
| 0.6773654476 |
| 0.376114082  |
| 0.4166666667 |
| 0.25         |
| 1            |
| 1            |
| 0.25         |
| 1            |
| 0.5588235294 |
| 1            |
| 0.5          |
| 1            |
| 1            |
| 1            |
| 1            |
| 1            |
| 1            |
| 1            |
| 0.1666666667 |
| 0.209972112  |
| 1            |
| 0.4178238744 |
| 1            |
| 0.6256684492 |
| 1            |
| 0.376114082  |
| 1            |
| 1            |
| 0.6256684492 |
| 1            |
| 0.2869875223 |
| 0.4166666667 |
| 0.6256684492 |
| 1            |
| 0.5588235294 |
| 0.25         |
| 0.25         |
| 0.4166666667 |
| 0.25         |
| 1            |
| 1            |
| 1            |
| 1            |
| 0.5          |
| 0.4166666667 |
| 0.1247771836 |
| 1            |
| 0.1379790553 |
| 0.5          |
| 1            |
| 1            |
| 1            |

|              |
|--------------|
| 1            |
| 1            |
| 0.4166666667 |
| 1            |
| 0.4166666667 |
| 1            |
| 1            |
| 1            |
| 1            |
| 1            |
| 1            |
| 0.5588235294 |
| 0.25         |
| 0.6256684492 |
| 0.2869875223 |
| 1            |
| 0.0637254902 |
| 0.0637254902 |
| 1            |
| 1            |
| 0.6773654476 |
| 0.6773654476 |
| 0.5          |
| 0.4166666667 |
| 1            |
| 0.5588235294 |
| 0.5588235294 |
| 1            |
| 1            |
| 1            |
| 0.5588235294 |
| 0.2869875223 |
| 0.2869875223 |
| 0.4166666667 |
| 1            |
| 1            |
| 1            |
| 1            |
| 1            |
| 1            |
| 0.6256684492 |
| 0.5588235294 |
| 0.5588235294 |
| 1            |
| 0.6256684492 |
| 1            |
| 1            |
| 1            |
| 0.5588235294 |
| 0.4178238744 |
| 0.4178238744 |

|              |
|--------------|
| 0.6295677362 |
| 0.4166666667 |
| 0.2869875223 |
| 1            |
| 0.0637254902 |
| 1            |
| 1            |
| 1            |
| 1            |
| 0.1666666667 |
| 1            |
| 1            |
| 1            |
| 0.4166666667 |
| 1            |
| 0.6256684492 |
| 1            |
| 0.376114082  |
| 1            |
| 0.1666666667 |
| 1            |
| 0.5          |
| 0.5          |
| 1            |
| 0.2869875223 |
| 0.2869875223 |
| 1            |
| 0.5588235294 |
| 0.5588235294 |
| 1            |
| 1            |
| 1            |
| 1            |
| 1            |
| 1            |
| 0.5588235294 |
| 1            |
| 0.4166666667 |
| 0.4166666667 |
| 0.5588235294 |
| 1            |
| 1            |
| 1            |
| 0.25         |
| 0.6256684492 |
| 0.6256684492 |
| 1            |
| 0.6256684492 |
| 1            |
| 0.25         |
| 0.376114082  |

|              |
|--------------|
| 0.1247771836 |
| 0.1247771836 |
| 0.376114082  |
| 0.376114082  |
| 0.376114082  |
| 0.376114082  |
| 0.376114082  |
| 0.376114082  |
| 0.376114082  |
| 0.1247771836 |
| 0.1247771836 |
| 0.5588235294 |
| 0.5588235294 |
| 1            |
| 1            |
| 1            |
| 0.4166666667 |
| 1            |
| 1            |
| 1            |
| 0.6256684492 |
| 0.6256684492 |
| 0.4166666667 |
| 1            |
| 1            |
| 1            |
| 1            |
| 1            |
| 1            |
| 0.4178238744 |
| 0.1666666667 |
| 0.6773654476 |
| 0.6295677362 |
| 1            |
| 0.5          |
| 1            |
| 1            |
| 0.376114082  |
| 0.376114082  |
| 0.5588235294 |
| 0.5588235294 |
| 1            |
| 0.0637254902 |
| 1            |
| 0.5588235294 |
| 0.5588235294 |
| 0.4166666667 |
| 1            |
| 1            |
| 0.4166666667 |
| 1            |

|              |
|--------------|
| 1            |
| 1            |
| 0.6256684492 |
| 0.5          |
| 1            |
| 0.5588235294 |
| 1            |
| 1            |
| 1            |
| 1            |
| 1            |
| 1            |
| 1            |
| 1            |
| 0.4166666667 |
| 1            |
| 1            |
| 0.4166666667 |
| 0.4166666667 |
| 1            |
| 1            |
| 1            |
| 1            |
| 0.5588235294 |
| 1            |
| 0.1666666667 |
| 1            |
| 1            |
| 1            |
| 1            |
| 1            |
| 1            |
| 0.5588235294 |
| 1            |
| 1            |
| 1            |
| 1            |
| 1            |
| 1            |
| 1            |
| 1            |
| 1            |
| 1            |
| 0.5588235294 |
| 1            |
| 1            |
| 1            |
| 1            |
| 1            |
| 1            |
| 1            |
| 1            |
| 0.5          |
| 1            |
| 0.5588235294 |

|              |
|--------------|
| 0.5588235294 |
| 1            |
| 1            |
| 0.1666666667 |
| 1            |
| 0.5588235294 |
| 0.5588235294 |
| 0.5588235294 |
| 0.5588235294 |
| 1            |
| 1            |
| 1            |
| 1            |
| 1            |
| 1            |
| 0.25         |
| 0.4166666667 |
| 0.5588235294 |
| 1            |
| 1            |
| 1            |
| 1            |
| 0.25         |
| 1            |
| 0.4166666667 |
| 0.4166666667 |
| 0.6256684492 |
| 1            |
| 0.1247771836 |
| 1            |
| 1            |
| 0.6256684492 |
| 0.25         |
| 0.4166666667 |
| 0.3666803232 |
| 0.4166666667 |
| 1            |
| 1            |
| 1            |
| 1            |
| 1            |
| 1            |
| 1            |
| 0.4166666667 |
| 0.6256684492 |
| 0.4166666667 |
| 0.1666666667 |
| 0.1379790553 |
| 0.4166666667 |
| 0.4166666667 |
| 1            |



|              |
|--------------|
| 1            |
| 1            |
| 1            |
| 0.416666667  |
| 0.416666667  |
| 1            |
| 0.416666667  |
| 0.416666667  |
| 1            |
| 1            |
| 0.416666667  |
| 1            |
| 0.416666667  |
| 0.376114082  |
| 0.5588235294 |
| 1            |
| 0.166666667  |
| 1            |
| 1            |
| 0.166666667  |
| 0.416666667  |
| 0.416666667  |
| 1            |
| 0.376114082  |
| 0.5          |
| 0.416666667  |
| 0.2869875223 |
| 0.2869875223 |
| 0.25         |
| 0.166666667  |
| 0.2869875223 |
| 0.376114082  |
| 1            |
| 0.416666667  |
| 0.0637254902 |
| 1            |
| 0.2869875223 |
| 1            |
| 0.6256684492 |
| 1            |
| 0.5588235294 |
| 0.416666667  |
| 1            |
| 0.5588235294 |
| 0.6773654476 |
| 0.5588235294 |
| 0.6773654476 |
| 1            |
| 1            |
| 0.6256684492 |
| 0.6256684492 |

|              |
|--------------|
| 1            |
| 1            |
| 0.166666667  |
| 0.416666667  |
| 1            |
| 0.5588235294 |
| 0.6256684492 |
| 0.6256684492 |
| 0.166666667  |
| 0.5588235294 |
| 0.25         |
| 0.6295677362 |
| 1            |
| 1            |
| 1            |
| 1            |
| 1            |
| 0.6256684492 |
| 0.416666667  |
| 0.416666667  |
| 1            |
| 1            |
| 0.5          |
| 0.5          |
| 1            |
| 0.5588235294 |
| 0.5588235294 |
| 0.5588235294 |
| 1            |
| 0.5588235294 |
| 0.6256684492 |
| 0.25         |
| 1            |
| 1            |
| 1            |
| 0.6256684492 |
| 0.6256684492 |
| 1            |
| 1            |
| 1            |
| 0.376114082  |
| 0.061942959  |
| 1            |
| 0.416666667  |
| 0.416666667  |
| 0.416666667  |
| 0.416666667  |
| 0.25         |
| 1            |
| 1            |
| 1            |

|              |
|--------------|
| 0.2950732295 |
| 0.376114082  |
| 1            |
| 1            |
| 1            |
| 1            |
| 1            |
| 1            |
| 0.25         |
| 0.376114082  |
| 1            |
| 1            |
| 0.5588235294 |
| 0.5588235294 |
| 0.1666666667 |
| 1            |
| 1            |
| 1            |
| 1            |
| 1            |
| 0.25         |
| 0.25         |
| 1            |
| 0.5588235294 |
| 0.5588235294 |
| 0.5          |
| 0.5          |
| 0.5588235294 |
| 0.5588235294 |
| 0.5588235294 |
| 0.5          |
| 0.5          |
| 1            |
| 1            |
| 0.1666666667 |
| 1            |
| 0.4166666667 |
| 0.25         |
| 0.4166666667 |
| 0.4166666667 |
| 1            |
| 1            |
| 1            |
| 1            |
| 1            |
| 0.376114082  |
| 1            |
| 1            |
| 0.6773654476 |
| 0.6773654476 |
| 1            |

|              |
|--------------|
| 0.6256684492 |
| 0.4166666667 |
| 0.4166666667 |
| 0.6256684492 |
| 1            |
| 1            |
| 1            |
| 1            |
| 1            |
| 0.4166666667 |
| 1            |
| 1            |
| 0.7287727104 |
| 0.4166666667 |
| 0.1666666667 |
| 0.25         |
| 0.25         |
| 1            |
| 1            |
| 0.1379790553 |
| 0.1379790553 |
| 0.1379790553 |
| 1            |
| 1            |
| 1            |
| 1            |
| 0.6295677362 |
| 0.6295677362 |
| 0.0637254902 |
| 0.0637254902 |
| 0.5588235294 |
| 0.6773654476 |
| 1            |
| 1            |
| 1            |
| 1            |
| 1            |
| 1            |
| 1            |
| 1            |
| 1            |
| 1            |
| 1            |
| 1            |
| 0.25         |
| 1            |
| 1            |
| 0.4166666667 |
| 0.1666666667 |
| 0.1666666667 |
| 0.6256684492 |

|              |
|--------------|
| 0.6256684492 |
| 1            |
| 0.4166666667 |
| 1            |
| 0.25         |
| 0.25         |
| 1            |
| 0.5588235294 |
| 0.4166666667 |
| 1            |
| 1            |
| 1            |
| 0.5588235294 |
| 0.5          |
| 0.2869875223 |
| 0.5          |
| 1            |
| 0.4166666667 |
| 1            |
| 0.376114082  |
| 1            |
| 1            |
| 0.5          |
| 1            |
| 1            |
| 1            |
| 0.5588235294 |
| 1            |
| 1            |
| 0.4166666667 |
| 0.6256684492 |
| 0.6256684492 |
| 0.5588235294 |
| 1            |
| 1            |
| 0.5588235294 |
| 1            |
| 0.6256684492 |
| 0.6295677362 |
| 0.4166666667 |
| 0.1379790553 |
| 0.25         |
| 1            |
| 0.25         |
| 0.4166666667 |
| 1            |
| 0.6256684492 |
| 0.6256684492 |
| 0.4166666667 |
| 1            |
| 0.25         |

|              |
|--------------|
| 0.416666667  |
| 0.6256684492 |
| 0.25         |
| 0.061942959  |
| 0.416666667  |
| 0.5          |
| 0.3666803232 |
| 1            |
| 0.5588235294 |
| 1            |
| 1            |
| 1            |
| 1            |
| 0.6773654476 |
| 1            |
| 1            |
| 0.416666667  |
| 1            |
| 1            |
| 0.416666667  |
| 0.5          |
| 0.5          |
| 0.416666667  |
| 1            |
| 1            |
| 0.166666667  |
| 0.166666667  |
| 1            |
| 1            |
| 1            |
| 1            |
| 0.166666667  |
| 0.25         |
| 0.6256684492 |
| 0.6256684492 |
| 1            |
| 1            |
| 0.25         |
| 0.5588235294 |
| 0.416666667  |
| 1            |
| 1            |
| 0.5588235294 |
| 0.166666667  |
| 1            |
| 0.416666667  |
| 1            |
| 1            |
| 0.25         |
| 0.416666667  |
| 1            |

|              |
|--------------|
| 1            |
| 1            |
| 0.416666667  |
| 0.416666667  |
| 0.416666667  |
| 0.416666667  |
| 0.416666667  |
| 1            |
| 0.166666667  |
| 0.2869875223 |
| 1            |
| 0.416666667  |
| 1            |
| 1            |
| 0.416666667  |
| 1            |
| 1            |
| 0.25         |
| 1            |
| 0.376114082  |
| 1            |
| 0.6256684492 |
| 0.25         |
| 0.5          |
| 1            |
| 1            |
| 0.166666667  |
| 1            |
| 0.0637254902 |
| 1            |
| 1            |
| 1            |
| 0.376114082  |
| 0.6256684492 |
| 0.6256684492 |
| 0.6256684492 |
| 1            |
| 0.5588235294 |
| 0.6256684492 |
| 1            |
| 0.6256684492 |
| 0.6256684492 |
| 0.166666667  |
| 1            |
| 1            |
| 1            |
| 0.061942959  |
| 0.6256684492 |
| 1            |
| 1            |
| 1            |

|              |
|--------------|
| 1            |
| 1            |
| 0.2869875223 |
| 0.2869875223 |
| 1            |
| 1            |
| 0.4166666667 |
| 0.2869875223 |
| 1            |
| 1            |
| 1            |
| 1            |
| 0.25         |
| 1            |
| 1            |
| 1            |
| 1            |
| 1            |
| 1            |
| 1            |
| 1            |
| 1            |
| 0.376114082  |
| 1            |
| 1            |
| 0.1666666667 |
| 1            |
| 1            |
| 1            |
| 0.4166666667 |
| 0.4166666667 |
| 0.4166666667 |
| 1            |
| 1            |
| 0.25         |
| 1            |
| 0.25         |
| 0.1379790553 |
| 0.1666666667 |
| 1            |
| 0.376114082  |
| 0.4166666667 |
| 1            |
| 1            |
| 1            |
| 1            |
| 0.5588235294 |
| 1            |
| 0.1379790553 |
| 1            |
| 0.5588235294 |
| 0.25         |



|              |
|--------------|
| 0.25         |
| 0.25         |
| 0.25         |
| 0.25         |
| 1            |
| 0.5588235294 |
| 1            |
| 0.416666667  |
| 0.416666667  |
| 0.416666667  |
| 1            |
| 1            |
| 1            |
| 1            |
| 0.6256684492 |
| 0.6773654476 |
| 0.6773654476 |
| 0.416666667  |
| 1            |
| 1            |
| 1            |
| 1            |
| 1            |
| 0.6773654476 |
| 1            |
| 0.416666667  |
| 1            |
| 1            |
| 1            |
| 1            |
| 1            |
| 0.5588235294 |
| 1            |
| 1            |
| 1            |
| 0.416666667  |
| 1            |
| 1            |
| 0.416666667  |
| 0.416666667  |
| 1            |
| 1            |
| 1            |
| 1            |
| 0.5          |
| 0.5588235294 |
| 1            |
| 1            |
| 1            |
| 1            |
| 0.4178238744 |



|              |
|--------------|
| 0.416666667  |
| 1            |
| 0.416666667  |
| 0.5588235294 |
| 0.5588235294 |
| 1            |
| 0.6256684492 |
| 0.5588235294 |
| 1            |
| 0.5          |
| 1            |
| 0.416666667  |
| 1            |
| 0.6256684492 |
| 1            |
| 1            |
| 1            |
| 1            |
| 0.5          |
| 1            |
| 0.6256684492 |
| 1            |
| 1            |
| 1            |
| 1            |
| 1            |
| 0.5          |
| 1            |
| 1            |
| 0.25         |
| 0.6256684492 |
| 0.376114082  |
| 1            |
| 0.6256684492 |
| 1            |
| 1            |
| 1            |
| 0.416666667  |
| 1            |
| 0.5          |
| 0.2869875223 |
| 1            |
| 1            |
| 0.6773654476 |
| 0.5588235294 |
| 1            |
| 0.5588235294 |
| 0.376114082  |
| 0.5588235294 |
| 0.416666667  |
| 0.4178238744 |

|              |
|--------------|
| 0.416666667  |
| 1            |
| 0.416666667  |
| 1            |
| 0.25         |
| 0.6256684492 |
| 0.5588235294 |
| 1            |
| 1            |
| 0.25         |
| 1            |
| 1            |
| 1            |
| 1            |
| 1            |
| 0.4178238744 |
| 0.376114082  |
| 1            |
| 0.6256684492 |
| 1            |
| 1            |
| 1            |
| 0.5          |
| 1            |
| 1            |
| 0.6773654476 |
| 1            |
| 1            |
| 1            |
| 0.166666667  |
| 0.166666667  |
| 1            |
| 0.5588235294 |
| 0.25         |
| 1            |
| 0.416666667  |
| 0.25         |
| 0.376114082  |
| 0.5          |
| 1            |
| 0.416666667  |
| 0.5588235294 |
| 1            |
| 1            |
| 1            |
| 0.416666667  |
| 1            |
| 0.5          |
| 1            |
| 1            |
| 1            |

|              |
|--------------|
| 1            |
| 0.376114082  |
| 0.416666667  |
| 1            |
| 1            |
| 1            |
| 0.416666667  |
| 1            |
| 1            |
| 0.2869875223 |
| 1            |
| 1            |
| 1            |
| 0.416666667  |
| 0.416666667  |
| 0.0637254902 |
| 0.25         |
| 1            |
| 1            |
| 0.166666667  |
| 1            |
| 1            |
| 1            |
| 1            |
| 1            |
| 1            |
| 0.416666667  |
| 0.5588235294 |
| 0.25         |
| 0.1379790553 |
| 1            |
| 1            |
| 1            |
| 1            |
| 1            |
| 1            |
| 1            |
| 0.5          |
| 0.416666667  |
| 0.376114082  |
| 0.416666667  |
| 1            |
| 0.416666667  |
| 1            |
| 0.416666667  |
| 1            |
| 1            |
| 1            |
| 1            |
| 0.6256684492 |
| 1            |

|              |
|--------------|
| 0.166666667  |
| 0.2869875223 |
| 0.376114082  |
| 0.5588235294 |
| 0.5588235294 |
| 1            |
| 1            |
| 0.5588235294 |
| 0.5588235294 |
| 0.5588235294 |
| 1            |
| 0.416666667  |
| 1            |
| 0.416666667  |
| 0.5          |
| 1            |
| 0.25         |
| 1            |
| 0.5588235294 |
| 0.5588235294 |
| 1            |
| 1            |
| 1            |
| 0.166666667  |
| 0.166666667  |
| 1            |
| 0.166666667  |
| 0.416666667  |
| 1            |
| 1            |
| 1            |
| 0.416666667  |
| 0.416666667  |
| 1            |
| 0.376114082  |
| 0.376114082  |
| 1            |
| 1            |
| 1            |
| 1            |
| 0.6256684492 |
| 0.6256684492 |
| 0.416666667  |
| 0.166666667  |
| 1            |
| 0.416666667  |
| 0.416666667  |
| 1            |
| 0.416666667  |
| 0.5588235294 |
| 0.416666667  |

|              |
|--------------|
| 0.416666667  |
| 0.416666667  |
| 1            |
| 0.209972112  |
| 0.416666667  |
| 0.6256684492 |
| 1            |
| 0.6295677362 |
| 1            |
| 0.6256684492 |
| 0.416666667  |
| 0.416666667  |
| 1            |
| 0.25         |
| 1            |
| 0.5588235294 |
| 0.5588235294 |
| 0.5588235294 |
| 0.5588235294 |
| 0.6256684492 |
| 1            |
| 0.4178238744 |
| 0.4178238744 |
| 1            |
| 0.6773654476 |
| 1            |
| 0.416666667  |
| 1            |
| 0.25         |
| 1            |
| 1            |
| 1            |
| 1            |
| 1            |
| 1            |
| 0.25         |
| 0.25         |
| 0.416666667  |
| 0.6256684492 |
| 1            |
| 0.5          |
| 0.4178238744 |
| 0.6773654476 |
| 1            |
| 1            |
| 0.2869875223 |
| 0.2869875223 |
| 1            |
| 1            |
| 1            |
| 1            |
| 0.5588235294 |

|              |
|--------------|
| 1            |
| 0.6295677362 |
| 0.6295677362 |
| 0.4166666667 |
| 0.4166666667 |
| 0.4166666667 |
| 1            |
| 1            |
| 0.5          |
| 1            |
| 1            |
| 1            |
| 1            |
| 1            |
| 1            |
| 1            |
| 1            |
| 0.4166666667 |
| 0.4166666667 |
| 0.4166666667 |
| 0.4166666667 |
| 0.5588235294 |
| 0.5          |
| 1            |
| 1            |
| 1            |
| 1            |
| 0.5          |
| 0.1666666667 |
| 1            |
| 1            |
| 0.6256684492 |
| 0.6256684492 |
| 0.4166666667 |
| 0.4166666667 |
| 0.4166666667 |
| 0.5          |
| 0.6256684492 |
| 1            |
| 0.5588235294 |
| 0.1247771836 |
| 0.5588235294 |
| 0.5588235294 |
| 0.5588235294 |
| 0.1666666667 |
| 1            |
| 1            |
| 1            |
| 1            |
| 1            |
| 1            |



|              |
|--------------|
| 0.6256684492 |
| 0.1666666667 |
| 0.25         |
| 0.25         |
| 0.25         |
| 1            |
| 1            |
| 0.4166666667 |
| 0.5588235294 |
| 0.5588235294 |
| 0.5588235294 |
| 1            |
| 1            |
| 0.376114082  |
| 1            |
| 1            |
| 0.6256684492 |
| 0.5588235294 |
| 0.6295677362 |
| 0.5          |
| 1            |
| 0.4166666667 |
| 1            |
| 0.6295677362 |
| 0.376114082  |
| 1            |
| 1            |
| 1            |
| 1            |
| 1            |
| 1            |
| 0.5588235294 |
| 1            |
| 1            |
| 1            |
| 1            |
| 1            |
| 0.6295677362 |
| 0.6295677362 |
| 0.6256684492 |
| 1            |
| 0.376114082  |
| 1            |
| 1            |
| 0.6256684492 |
| 0.4166666667 |
| 0.2869875223 |
| 0.5588235294 |
| 1            |
| 1            |
| 0.5588235294 |



|              |
|--------------|
| 0.416666667  |
| 0.416666667  |
| 1            |
| 1            |
| 0.6256684492 |
| 1            |
| 1            |
| 0.416666667  |
| 0.25         |
| 0.6773654476 |
| 0.5588235294 |
| 0.1379790553 |
| 1            |
| 0.6773654476 |
| 0.416666667  |
| 0.209972112  |
| 1            |
| 1            |
| 1            |
| 1            |
| 0.2869875223 |
| 0.416666667  |
| 0.25         |
| 1            |
| 0.5588235294 |
| 1            |
| 0.416666667  |
| 1            |
| 1            |
| 0.6773654476 |
| 0.6256684492 |
| 0.416666667  |
| 0.209972112  |
| 1            |
| 1            |
| 0.209972112  |
| 0.6256684492 |
| 0.416666667  |
| 0.5          |
| 0.25         |
| 1            |
| 0.2869875223 |
| 0.2869875223 |
| 0.5          |
| 0.416666667  |
| 1            |
| 1            |
| 0.166666667  |
| 1            |
| 0.2869875223 |
| 0.166666667  |

|              |
|--------------|
| 0.4178238744 |
| 1            |
| 0.5          |
| 0.376114082  |
| 0.25         |
| 0.5588235294 |
| 1            |
| 1            |
| 0.6256684492 |
| 1            |
| 0.5588235294 |
| 0.5588235294 |
| 0.5588235294 |
| 0.5          |
| 0.6256684492 |
| 0.6256684492 |
| 0.061942959  |
| 1            |
| 0.1379790553 |
| 0.5          |
| 0.5          |
| 0.5588235294 |
| 1            |
| 0.5588235294 |
| 1            |
| 0.4166666667 |
| 1            |
| 0.5588235294 |
| 0.3666803232 |
| 1            |
| 1            |
| 1            |
| 1            |
| 1            |
| 0.6256684492 |
| 0.4166666667 |
| 0.5          |
| 1            |
| 1            |
| 0.5588235294 |
| 1            |
| 1            |
| 1            |
| 0.4166666667 |
| 1            |
| 0.5588235294 |
| 1            |
| 1            |
| 0.4166666667 |
| 1            |
| 1            |

|              |
|--------------|
| 0.2869875223 |
| 1            |
| 1            |
| 0.376114082  |
| 1            |
| 1            |
| 1            |
| 1            |
| 1            |
| 0.376114082  |
| 1            |
| 1            |
| 0.1379790553 |
| 0.1379790553 |
| 0.1379790553 |
| 1            |
| 0.6773654476 |
| 0.5588235294 |
| 1            |
| 1            |
| 1            |
| 1            |
| 0.376114082  |
| 0.376114082  |
| 0.209972112  |
| 1            |
| 1            |
| 0.4166666667 |
| 1            |
| 1            |
| 1            |
| 1            |
| 1            |
| 0.4166666667 |
| 1            |
| 0.25         |
| 0.4166666667 |
| 0.4166666667 |
| 0.6773654476 |
| 0.6773654476 |
| 0.6773654476 |
| 0.6773654476 |
| 0.6773654476 |
| 0.6773654476 |
| 1            |
| 0.5588235294 |
| 0.5588235294 |
| 1            |
| 0.4166666667 |
| 1            |
| 1            |
| 1            |

|              |
|--------------|
| 0.416666667  |
| 1            |
| 0.061942959  |
| 1            |
| 0.209972112  |
| 1            |
| 1            |
| 1            |
| 0.5588235294 |
| 0.416666667  |
| 1            |
| 0.2869875223 |
| 1            |
| 1            |
| 1            |
| 0.209972112  |
| 0.6256684492 |
| 0.1379790553 |
| 1            |
| 0.5588235294 |
| 0.5588235294 |
| 1            |
| 0.5          |
| 1            |
| 1            |
| 0.5588235294 |
| 0.416666667  |
| 0.416666667  |
| 0.5588235294 |
| 0.5588235294 |
| 0.5588235294 |
| 1            |
| 1            |
| 1            |
| 1            |
| 0.376114082  |
| 0.6256684492 |
| 0.6256684492 |
| 1            |
| 0.416666667  |
| 0.376114082  |
| 1            |
| 0.6295677362 |
| 1            |
| 1            |
| 0.416666667  |
| 0.5          |
| 0.5588235294 |
| 1            |
| 1            |
| 0.416666667  |

|              |
|--------------|
| 1            |
| 0.6295677362 |
| 0.6295677362 |
| 0.5588235294 |
| 1            |
| 1            |
| 0.4166666667 |
| 1            |
| 1            |
| 1            |
| 1            |
| 1            |
| 0.1666666667 |
| 0.6295677362 |
| 0.6295677362 |
| 0.376114082  |
| 1            |
| 1            |
| 0.6256684492 |
| 0.5          |
| 0.1666666667 |
| 0.6256684492 |
| 0.6256684492 |
| 0.2869875223 |
| 0.4166666667 |
| 0.4166666667 |
| 1            |
| 0.5          |
| 1            |
| 0.5588235294 |
| 0.1379790553 |
| 1            |
| 0.6773654476 |
| 1            |
| 1            |
| 0.061942959  |
| 0.5588235294 |
| 1            |
| 1            |
| 1            |
| 1            |
| 0.2869875223 |
| 1            |
| 0.1666666667 |
| 0.6773654476 |
| 1            |
| 1            |
| 0.376114082  |
| 1            |
| 1            |
| 1            |

|              |
|--------------|
| 1            |
| 1            |
| 1            |
| 1            |
| 1            |
| 1            |
| 0.416666667  |
| 1            |
| 1            |
| 1            |
| 1            |
| 1            |
| 1            |
| 1            |
| 1            |
| 1            |
| 1            |
| 1            |
| 1            |
| 1            |
| 1            |
| 1            |
| 1            |
| 1            |
| 1            |
| 0.5588235294 |
| 0.5588235294 |
| 0.5588235294 |
| 0.5588235294 |
| 0.5588235294 |
| 1            |
| 1            |
| 1            |
| 1            |
| 0.6256684492 |
| 0.416666667  |
| 1            |
| 1            |
| 1            |
| 0.166666667  |
| 0.25         |
| 1            |
| 1            |
| 1            |
| 1            |
| 0.25         |
| 1            |
| 1            |
| 1            |
| 1            |
| 1            |
| 1            |
| 0.416666667  |
| 1            |



|              |
|--------------|
| 0.416666667  |
| 0.416666667  |
| 1            |
| 1            |
| 0.376114082  |
| 0.376114082  |
| 1            |
| 1            |
| 1            |
| 0.6256684492 |
| 0.6256684492 |
| 0.209972112  |
| 1            |
| 1            |
| 1            |
| 1            |
| 1            |
| 0.6295677362 |
| 0.2869875223 |
| 0.6256684492 |
| 0.416666667  |
| 0.5          |
| 1            |
| 1            |
| 1            |
| 1            |
| 1            |
| 0.416666667  |
| 0.416666667  |
| 0.25         |
| 0.5588235294 |
| 0.25         |
| 0.25         |
| 0.25         |
| 1            |
| 0.25         |
| 0.25         |
| 0.25         |
| 0.25         |
| 0.416666667  |
| 0.166666667  |
| 0.166666667  |
| 1            |
| 0.376114082  |
| 0.6773654476 |
| 1            |
| 1            |
| 1            |
| 0.416666667  |
| 1            |
| 0.166666667  |

|              |
|--------------|
| 0.166666667  |
| 0.416666667  |
| 0.2869875223 |
| 0.416666667  |
| 1            |
| 1            |
| 0.376114082  |
| 0.5588235294 |
| 1            |
| 1            |
| 1            |
| 0.166666667  |
| 0.1379790553 |
| 0.416666667  |
| 0.5588235294 |
| 0.5588235294 |
| 1            |
| 1            |
| 0.376114082  |
| 1            |
| 1            |
| 0.5588235294 |
| 1            |
| 0.25         |
| 0.5588235294 |
| 0.061942959  |
| 1            |
| 0.416666667  |
| 1            |
| 1            |
| 0.6256684492 |
| 1            |
| 0.416666667  |
| 0.416666667  |
| 1            |
| 0.166666667  |
| 1            |
| 1            |
| 0.1379790553 |
| 0.25         |
| 0.1379790553 |
| 1            |
| 1            |
| 1            |
| 1            |
| 0.6773654476 |
| 1            |
| 1            |
| 0.416666667  |
| 0.6256684492 |
| 1            |

|              |
|--------------|
| 1            |
| 1            |
| 1            |
| 1            |
| 1            |
| 1            |
| 1            |
| 1            |
| 1            |
| 0.5          |
| 1            |
| 0.2869875223 |
| 0.25         |
| 1            |
| 1            |
| 1            |
| 1            |
| 1            |
| 1            |
| 1            |
| 1            |
| 0.416666667  |
| 0.5588235294 |
| 1            |
| 1            |
| 0.5588235294 |
| 0.25         |
| 0.416666667  |
| 1            |
| 0.25         |
| 0.25         |
| 0.25         |
| 1            |
| 1            |
| 0.416666667  |
| 1            |
| 0.5          |
| 0.1379790553 |
| 1            |
| 1            |
| 0.416666667  |
| 0.166666667  |
| 0.416666667  |
| 0.376114082  |
| 0.061942959  |
| 0.6256684492 |
| 0.416666667  |
| 1            |
| 0.4178238744 |
| 0.6256684492 |
| 0.6256684492 |
| 1            |
| 1            |

|              |
|--------------|
| 1            |
| 1            |
| 0.1379790553 |
| 1            |
| 1            |
| 1            |
| 0.416666667  |
| 0.416666667  |
| 0.416666667  |
| 0.416666667  |
| 0.25         |
| 0.25         |
| 0.166666667  |
| 0.2869875223 |
| 0.416666667  |
| 0.25         |
| 1            |
| 0.2869875223 |
| 0.166666667  |
| 1            |
| 1            |
| 1            |
| 1            |
| 1            |
| 0.209972112  |
| 0.209972112  |
| 0.416666667  |
| 1            |
| 1            |
| 1            |
| 1            |
| 1            |
| 0.166666667  |
| 1            |
| 1            |
| 1            |
| 0.416666667  |
| 0.25         |
| 1            |
| 1            |
| 0.376114082  |
| 0.25         |
| 0.25         |
| 0.3666803232 |
| 0.6295677362 |
| 0.5          |
| 0.5588235294 |
| 0.166666667  |
| 1            |
| 0.6773654476 |
| 0.5          |

|              |
|--------------|
| 0.416666667  |
| 0.416666667  |
| 0.5588235294 |
| 0.5588235294 |
| 0.209972112  |
| 0.6256684492 |
| 0.209972112  |
| 0.416666667  |
| 0.416666667  |
| 0.416666667  |
| 0.416666667  |
| 0.416666667  |
| 0.416666667  |
| 0.416666667  |
| 0.416666667  |
| 0.25         |
| 0.5          |
| 0.416666667  |
| 1            |
| 1            |
| 0.5          |
| 0.25         |
| 0.209972112  |
| 0.416666667  |
| 1            |
| 0.416666667  |
| 1            |
| 1            |
| 1            |
| 1            |
| 0.2869875223 |
| 0.5588235294 |
| 1            |
| 1            |
| 0.416666667  |
| 1            |
| 1            |
| 0.416666667  |
| 1            |
| 0.416666667  |
| 0.416666667  |
| 0.2869875223 |
| 0.6773654476 |
| 0.6773654476 |
| 0.6773654476 |
| 0.6773654476 |
| 0.6773654476 |
| 1            |
| 0.6773654476 |
| 0.5588235294 |
| 1            |
| 1            |

|              |
|--------------|
| 1            |
| 1            |
| 0.6773654476 |
| 1            |
| 1            |
| 0.6773654476 |
| 1            |
| 0.5588235294 |
| 0.5588235294 |
| 0.376114082  |
| 1            |
| 0.4166666667 |
| 0.4166666667 |
| 0.4166666667 |
| 0.4166666667 |
| 0.4166666667 |
| 0.4166666667 |
| 0.5588235294 |
| 1            |
| 1            |
| 0.5          |
| 0.25         |
| 1            |
| 1            |
| 0.4166666667 |
| 0.4166666667 |
| 1            |
| 1            |
| 1            |
| 0.6295677362 |
| 0.4166666667 |
| 0.376114082  |
| 1            |
| 0.5          |
| 1            |
| 0.6773654476 |
| 0.6773654476 |
| 1            |
| 0.5          |
| 1            |
| 1            |
| 0.1666666667 |
| 0.1666666667 |
| 0.4178238744 |
| 0.5588235294 |
| 1            |
| 0.25         |
| 0.4166666667 |
| 1            |
| 0.5          |
| 0.4166666667 |
| 1            |

|              |
|--------------|
| 0.416666667  |
| 0.416666667  |
| 0.6256684492 |
| 1            |
| 0.25         |
| 0.5588235294 |
| 0.416666667  |
| 1            |
| 0.416666667  |
| 1            |
| 0.1247771836 |
| 0.1247771836 |
| 0.1247771836 |
| 0.1247771836 |
| 0.1247771836 |
| 0.1247771836 |
| 0.1247771836 |
| 0.1247771836 |
| 0.1247771836 |
| 0.1247771836 |
| 0.1247771836 |
| 0.1247771836 |
| 0.1247771836 |
| 0.1247771836 |
| 0.1247771836 |
| 0.1247771836 |
| 0.25         |
| 0.416666667  |
| 1            |
| 1            |
| 1            |
| 1            |
| 0.416666667  |
| 0.5588235294 |
| 0.209972112  |
| 0.6256684492 |
| 0.6256684492 |
| 1            |
| 1            |
| 1            |
| 1            |
| 1            |
| 0.5          |
| 0.6256684492 |
| 1            |
| 1            |
| 1            |
| 1            |
| 1            |
| 1            |
| 0.5588235294 |
| 0.416666667  |
| 0.6295677362 |
| 1            |

|              |
|--------------|
| 1            |
| 0.416666667  |
| 1            |
| 0.376114082  |
| 0.376114082  |
| 0.5588235294 |
| 0.166666667  |
| 0.166666667  |
| 1            |
| 1            |
| 1            |
| 1            |
| 0.6256684492 |
| 0.25         |
| 0.5588235294 |
| 0.5588235294 |
| 0.5588235294 |
| 1            |
| 1            |
| 1            |
| 1            |
| 1            |
| 0.376114082  |
| 1            |
| 0.5588235294 |
| 0.5588235294 |
| 0.4178238744 |
| 1            |
| 1            |
| 1            |
| 0.5          |
| 0.5          |
| 1            |
| 0.376114082  |
| 0.6256684492 |
| 1            |
| 1            |
| 0.6256684492 |
| 0.166666667  |
| 1            |
| 0.5588235294 |
| 0.5588235294 |
| 0.5588235294 |
| 1            |
| 0.416666667  |
| 1            |
| 1            |
| 0.5          |
| 0.5588235294 |
| 1            |
| 1            |



|              |
|--------------|
| 1            |
| 0.5588235294 |
| 1            |
| 0.4166666667 |
| 0.1666666667 |
| 0.376114082  |
| 1            |
| 0.4178238744 |
| 1            |
| 0.4166666667 |
| 1            |
| 1            |
| 1            |
| 1            |
| 1            |
| 1            |
| 1            |
| 0.4166666667 |
| 0.4166666667 |
| 1            |
| 0.6256684492 |
| 1            |
| 1            |
| 1            |
| 0.6256684492 |
| 0.5588235294 |
| 1            |
| 1            |
| 0.1666666667 |
| 0.376114082  |
| 0.1379790553 |
| 0.1379790553 |
| 0.1666666667 |
| 1            |
| 1            |
| 0.1666666667 |
| 1            |
| 1            |
| 1            |
| 1            |
| 0.1379790553 |
| 0.6256684492 |
| 1            |
| 0.4166666667 |
| 0.4166666667 |
| 1            |
| 1            |
| 1            |
| 0.4166666667 |
| 1            |
| 1            |

|              |
|--------------|
| 1            |
| 1            |
| 1            |
| 1            |
| 0.209972112  |
| 0.209972112  |
| 0.6295677362 |
| 0.6295677362 |
| 0.209972112  |
| 1            |
| 1            |
| 1            |
| 0.5          |
| 1            |
| 1            |
| 1            |
| 1            |
| 1            |
| 1            |
| 1            |
| 0.5          |
| 0.6256684492 |
| 0.376114082  |
| 1            |
| 0.6773654476 |
| 0.6773654476 |
| 1            |
| 0.5588235294 |
| 1            |
| 1            |
| 1            |
| 1            |
| 0.4166666667 |
| 0.4166666667 |
| 0.6773654476 |
| 1            |
| 1            |
| 1            |
| 0.5          |
| 0.1379790553 |
| 1            |
| 1            |
| 1            |
| 0.5          |
| 0.1666666667 |
| 0.1666666667 |
| 0.6256684492 |
| 1            |
| 0.4166666667 |
| 1            |
| 1            |

|              |
|--------------|
| 0.6256684492 |
| 1            |
| 0.6295677362 |
| 1            |
| 1            |
| 1            |
| 0.5588235294 |
| 0.4166666667 |
| 1            |
| 0.2869875223 |
| 1            |
| 1            |
| 0.4166666667 |
| 0.4166666667 |
| 1            |
| 0.25         |
| 1            |
| 1            |
| 1            |
| 1            |
| 0.4166666667 |
| 1            |
| 0.4166666667 |
| 0.2869875223 |
| 0.4166666667 |
| 1            |
| 0.4166666667 |
| 1            |
| 0.2869875223 |
| 0.061942959  |
| 1            |
| 0.4166666667 |
| 1            |
| 1            |
| 1            |
| 0.6773654476 |
| 0.6773654476 |
| 1            |
| 1            |
| 0.5588235294 |
| 1            |
| 0.4178238744 |
| 0.5588235294 |
| 1            |
| 1            |
| 1            |
| 1            |
| 1            |
| 0.4166666667 |
| 0.4166666667 |
| 0.376114082  |

|              |
|--------------|
| 0.416666667  |
| 0.5588235294 |
| 0.416666667  |
| 0.416666667  |
| 0.6256684492 |
| 0.6256684492 |
| 0.416666667  |
| 1            |
| 1            |
| 1            |
| 0.416666667  |
| 0.5588235294 |
| 1            |
| 1            |
| 1            |
| 0.376114082  |
| 0.416666667  |
| 1            |
| 1            |
| 1            |
| 0.1379790553 |
| 0.25         |
| 1            |
| 0.5588235294 |
| 0.4178238744 |
| 0.4178238744 |
| 1            |
| 1            |
| 1            |
| 1            |
| 1            |
| 1            |
| 1            |
| 0.25         |
| 1            |
| 1            |
| 0.6256684492 |
| 1            |
| 0.5          |
| 0.6256684492 |
| 0.5588235294 |
| 1            |
| 1            |
| 1            |
| 0.416666667  |
| 1            |
| 1            |
| 1            |
| 0.25         |
| 0.416666667  |
| 0.6256684492 |

|              |
|--------------|
| 0.1379790553 |
| 1            |
| 1            |
| 1            |
| 1            |
| 1            |
| 0.6773654476 |
| 0.6773654476 |
| 1            |
| 1            |
| 1            |
| 1            |
| 1            |
| 0.4166666667 |
| 0.4166666667 |
| 0.4166666667 |
| 0.4166666667 |
| 1            |
| 1            |
| 1            |
| 0.0637254902 |
| 0.4166666667 |
| 1            |
| 1            |
| 1            |
| 1            |
| 0.25         |
| 1            |
| 0.5588235294 |
| 0.2869875223 |
| 0.5588235294 |
| 0.1379790553 |
| 1            |
| 1            |
| 0.5588235294 |
| 0.5          |
| 1            |
| 1            |
| 0.4166666667 |
| 0.376114082  |
| 1            |
| 1            |
| 1            |
| 1            |
| 1            |
| 0.5588235294 |
| 1            |
| 0.6256684492 |
| 0.5          |
| 1            |
| 1            |

|              |
|--------------|
| 0.416666667  |
| 0.6256684492 |
| 1            |
| 1            |
| 1            |
| 1            |
| 0.209972112  |
| 0.209972112  |
| 0.209972112  |
| 0.416666667  |
| 1            |
| 1            |
| 1            |
| 0.6256684492 |
| 1            |
| 0.1247771836 |
| 1            |
| 1            |
| 0.166666667  |
| 1            |
| 1            |
| 0.6773654476 |
| 1            |
| 1            |
| 1            |
| 1            |
| 0.5588235294 |
| 1            |
| 1            |
| 0.5          |
| 0.2869875223 |
| 0.5588235294 |
| 0.376114082  |
| 1            |
| 0.5          |
| 1            |
| 1            |
| 0.166666667  |
| 1            |
| 0.209972112  |
| 1            |
| 0.5588235294 |
| 1            |
| 0.416666667  |
| 0.376114082  |
| 1            |
| 1            |
| 1            |
| 1            |
| 0.6773654476 |
| 0.6773654476 |

|              |
|--------------|
| 1            |
| 1            |
| 1            |
| 0.25         |
| 1            |
| 0.6256684492 |
| 1            |
| 0.25         |
| 1            |
| 1            |
| 1            |
| 1            |
| 1            |
| 1            |
| 0.5588235294 |
| 0.5588235294 |
| 1            |
| 1            |
| 0.1666666667 |
| 1            |
| 0.6256684492 |
| 0.5          |
| 1            |
| 0.3666803232 |
| 1            |
| 1            |
| 0.4166666667 |
| 0.5          |
| 0.4166666667 |
| 1            |
| 0.25         |
| 0.5          |
| 1            |
| 1            |
| 0.5588235294 |
| 1            |
| 0.5          |
| 0.6256684492 |
| 0.6256684492 |
| 0.4166666667 |
| 1            |
| 1            |
| 0.6295677362 |
| 1            |
| 0.4178238744 |
| 1            |
| 0.6256684492 |
| 0.25         |
| 1            |
| 1            |
| 1            |





|              |
|--------------|
| 0.5588235294 |
| 0.5588235294 |
| 1            |
| 0.5588235294 |
| 1            |
| 0.5588235294 |
| 0.5588235294 |
| 0.5588235294 |
| 1            |
| 0.6295677362 |
| 1            |
| 1            |
| 1            |
| 1            |
| 0.5          |
| 0.5          |
| 0.1379790553 |
| 0.1666666667 |
| 0.5          |
| 0.5588235294 |
| 1            |
| 0.25         |
| 1            |
| 0.5588235294 |
| 1            |
| 1            |
| 1            |
| 0.376114082  |
| 1            |
| 0.2869875223 |
| 0.5588235294 |
| 1            |
| 1            |
| 0.209972112  |
| 1            |
| 1            |
| 0.5588235294 |
| 1            |
| 0.6256684492 |
| 1            |
| 1            |
| 1            |
| 1            |
| 1            |
| 0.25         |
| 0.5          |
| 1            |
| 0.4166666667 |
| 1            |
| 0.4166666667 |
| 0.4166666667 |

|               |
|---------------|
| 0.416666667   |
| 1             |
| 1             |
| 1             |
| 1             |
| 1             |
| 1             |
| 0.6256684492  |
| 0.416666667   |
| 1             |
| 0.6256684492  |
| 0.25          |
| 0.376114082   |
| 1             |
| 0.209972112   |
| 1             |
| 0.416666667   |
| 0.1379790553  |
| 1             |
| 1             |
| 0.25          |
| 0.5           |
| 0.5           |
| 0.1379790553  |
| 0.25          |
| 0.416666667   |
| 0.5           |
| 0.416666667   |
| 0.416666667   |
| 1             |
| 1             |
| 1             |
| 1             |
| 1             |
| 1             |
| 1             |
| 0.5           |
| 1             |
| 0.4178238744  |
| 0.5588235294  |
| 1             |
| 0.03042881375 |
| 0.03042881375 |
| 1             |
| 0.376114082   |
| 0.166666667   |
| 0.6773654476  |
| 0.5           |
| 1             |
| 1             |
| 1             |

|              |
|--------------|
| 1            |
| 0.416666667  |
| 0.416666667  |
| 0.6256684492 |
| 0.4178238744 |
| 0.1247771836 |
| 0.1247771836 |
| 0.166666667  |
| 1            |
| 0.5588235294 |
| 0.5588235294 |
| 1            |
| 1            |
| 1            |
| 0.25         |
| 1            |
| 1            |
| 0.6256684492 |
| 1            |
| 0.166666667  |
| 0.5588235294 |
| 0.25         |
| 1            |
| 1            |
| 0.166666667  |
| 0.416666667  |
| 0.376114082  |
| 1            |
| 1            |
| 0.416666667  |
| 0.25         |
| 1            |
| 1            |
| 0.416666667  |
| 0.1247771836 |
| 0.1247771836 |
| 1            |
| 1            |
| 1            |
| 0.2869875223 |
| 0.5588235294 |
| 1            |
| 1            |
| 1            |
| 0.6256684492 |
| 0.209972112  |
| 0.166666667  |
| 1            |
| 1            |
| 0.416666667  |
| 1            |

|              |
|--------------|
| 1            |
| 0.166666667  |
| 1            |
| 1            |
| 0.209972112  |
| 0.416666667  |
| 1            |
| 1            |
| 0.416666667  |
| 0.416666667  |
| 0.416666667  |
| 1            |
| 0.416666667  |
| 1            |
| 0.5588235294 |
| 1            |
| 1            |
| 1            |
| 1            |
| 1            |
| 0.376114082  |
| 1            |
| 0.6256684492 |
| 1            |
| 0.166666667  |
| 0.5588235294 |
| 0.416666667  |
| 0.416666667  |
| 1            |
| 1            |
| 1            |
| 0.376114082  |
| 0.416666667  |
| 0.416666667  |
| 0.416666667  |
| 1            |
| 1            |
| 0.25         |
| 0.5588235294 |
| 1            |
| 1            |
| 0.5          |
| 0.416666667  |
| 1            |
| 0.166666667  |
| 0.25         |
| 0.3666803232 |
| 0.3666803232 |
| 0.416666667  |
| 1            |
| 0.416666667  |

|              |
|--------------|
| 1            |
| 0.416666667  |
| 0.6256684492 |
| 0.5588235294 |
| 1            |
| 1            |
| 1            |
| 0.25         |
| 0.416666667  |
| 0.2869875223 |
| 1            |
| 1            |
| 1            |
| 0.6256684492 |
| 1            |
| 0.2869875223 |
| 1            |
| 0.6295677362 |
| 1            |
| 1            |
| 1            |
| 0.6256684492 |
| 1            |
| 0.416666667  |
| 0.376114082  |
| 1            |
| 0.5588235294 |
| 0.5588235294 |
| 0.5588235294 |
| 0.5588235294 |
| 1            |
| 1            |
| 0.416666667  |
| 0.5588235294 |
| 1            |
| 1            |
| 0.6256684492 |
| 0.1379790553 |
| 0.416666667  |
| 0.416666667  |
| 1            |
| 1            |
| 0.6256684492 |
| 0.6256684492 |
| 0.6256684492 |
| 1            |
| 1            |
| 1            |
| 1            |
| 0.6256684492 |
| 0.416666667  |

|              |
|--------------|
| 0.5          |
| 1            |
| 1            |
| 0.6773654476 |
| 0.376114082  |
| 0.376114082  |
| 0.416666667  |
| 1            |
| 1            |
| 1            |
| 0.416666667  |
| 0.6295677362 |
| 1            |
| 0.6256684492 |
| 0.5588235294 |
| 0.416666667  |
| 0.416666667  |
| 1            |
| 1            |
| 1            |
| 1            |
| 1            |
| 0.416666667  |
| 0.416666667  |
| 0.376114082  |
| 1            |
| 1            |
| 1            |
| 0.5588235294 |
| 0.25         |
| 1            |
| 1            |
| 0.1247771836 |
| 0.1247771836 |
| 0.2869875223 |
| 0.5588235294 |
| 1            |
| 1            |
| 0.416666667  |
| 0.5          |
| 1            |
| 0.5588235294 |
| 0.5588235294 |
| 1            |
| 1            |
| 1            |
| 0.416666667  |
| 0.6256684492 |
| 0.5          |
| 0.25         |
| 1            |

|              |
|--------------|
| 1            |
| 1            |
| 1            |
| 1            |
| 1            |
| 1            |
| 0.1379790553 |
| 0.416666667  |
| 0.416666667  |
| 1            |
| 0.416666667  |
| 0.5          |
| 0.5          |
| 0.416666667  |
| 1            |
| 0.061942959  |
| 0.5588235294 |
| 1            |
| 1            |
| 1            |
| 1            |
| 0.416666667  |
| 1            |
| 0.5588235294 |
| 0.416666667  |
| 0.416666667  |
| 0.416666667  |
| 0.2869875223 |
| 0.5588235294 |
| 1            |
| 1            |
| 0.6256684492 |
| 1            |
| 1            |
| 0.25         |
| 0.166666667  |
| 1            |
| 1            |
| 1            |
| 1            |
| 0.6256684492 |
| 1            |
| 1            |
| 1            |
| 1            |
| 0.2869875223 |
| 0.5          |
| 1            |
| 0.6256684492 |
| 0.6256684492 |
| 0.6256684492 |

|              |
|--------------|
| 1            |
| 0.25         |
| 1            |
| 0.416666667  |
| 1            |
| 1            |
| 1            |
| 1            |
| 0.416666667  |
| 1            |
| 0.166666667  |
| 1            |
| 0.416666667  |
| 1            |
| 1            |
| 0.416666667  |
| 1            |
| 1            |
| 0.416666667  |
| 1            |
| 0.166666667  |
| 0.25         |
| 1            |
| 1            |
| 1            |
| 1            |
| 1            |
| 0.416666667  |
| 0.416666667  |
| 1            |
| 0.6256684492 |
| 0.6256684492 |
| 1            |
| 0.25         |
| 0.25         |
| 0.416666667  |
| 0.416666667  |
| 1            |
| 1            |
| 1            |
| 1            |
| 1            |
| 1            |
| 0.6256684492 |
| 0.6256684492 |
| 0.6256684492 |
| 0.416666667  |
| 1            |
| 0.166666667  |
| 1            |
| 1            |



|              |
|--------------|
| 1            |
| 0.25         |
| 1            |
| 0.416666667  |
| 0.5          |
| 0.416666667  |
| 1            |
| 1            |
| 0.5588235294 |
| 0.416666667  |
| 0.376114082  |
| 1            |
| 1            |
| 1            |
| 1            |
| 1            |
| 1            |
| 1            |
| 1            |
| 1            |
| 0.1247771836 |
| 1            |
| 0.25         |
| 0.25         |
| 1            |
| 0.5588235294 |
| 1            |
| 1            |
| 1            |
| 0.209972112  |
| 1            |
| 0.5588235294 |
| 1            |
| 0.1379790553 |
| 1            |
| 0.6256684492 |
| 1            |
| 1            |
| 1            |
| 1            |
| 0.416666667  |
| 0.5          |
| 0.5          |
| 0.416666667  |
| 1            |
| 1            |
| 0.1379790553 |
| 1            |
| 0.416666667  |
| 0.6256684492 |
| 0.6256684492 |

|              |
|--------------|
| 1            |
| 1            |
| 0.5          |
| 0.166666667  |
| 1            |
| 1            |
| 1            |
| 0.5588235294 |
| 1            |
| 1            |
| 0.166666667  |
| 1            |
| 1            |
| 0.416666667  |
| 0.416666667  |
| 1            |
| 1            |
| 1            |
| 1            |
| 1            |
| 1            |
| 1            |
| 1            |
| 0.6256684492 |
| 1            |
| 0.416666667  |
| 1            |
| 1            |
| 1            |
| 1            |
| 1            |
| 0.416666667  |
| 1            |
| 0.416666667  |
| 1            |
| 0.416666667  |
| 0.416666667  |
| 0.376114082  |
| 1            |
| 1            |
| 1            |
| 1            |
| 1            |
| 0.416666667  |
| 0.376114082  |
| 1            |
| 1            |
| 1            |
| 0.416666667  |
| 0.416666667  |
| 1            |



|              |
|--------------|
| 1            |
| 0.5588235294 |
| 1            |
| 1            |
| 0.376114082  |
| 1            |
| 1            |
| 0.4166666667 |
| 0.5588235294 |
| 1            |
| 1            |
| 0.4166666667 |
| 1            |
| 1            |
| 0.376114082  |
| 0.1666666667 |
| 1            |
| 1            |
| 1            |
| 1            |
| 1            |
| 0.4166666667 |
| 0.5588235294 |
| 0.2869875223 |
| 0.6256684492 |
| 0.4166666667 |
| 0.25         |
| 0.25         |
| 0.4166666667 |
| 0.4166666667 |
| 1            |
| 0.5588235294 |
| 0.5588235294 |
| 1            |
| 1            |
| 1            |
| 1            |
| 1            |
| 1            |
| 1            |
| 1            |
| 1            |
| 1            |
| 1            |
| 0.1666666667 |
| 1            |
| 1            |
| 1            |
| 1            |
| 0.4166666667 |
| 1            |
| 1            |

|              |
|--------------|
| 0.5588235294 |
| 0.5          |
| 0.6256684492 |
| 1            |
| 1            |
| 1            |
| 1            |
| 1            |
| 0.5588235294 |
| 0.5588235294 |
| 0.5588235294 |
| 0.5588235294 |
| 0.1666666667 |
| 0.5588235294 |
| 1            |
| 0.5588235294 |
| 1            |
| 1            |
| 1            |
| 1            |
| 0.5588235294 |
| 1            |
| 0.6256684492 |
| 1            |
| 1            |
| 1            |
| 1            |
| 1            |
| 1            |
| 0.2869875223 |
| 0.6256684492 |
| 0.6256684492 |
| 1            |
| 1            |
| 1            |
| 1            |
| 0.1247771836 |
| 0.5588235294 |
| 1            |
| 0.4166666667 |
| 0.4166666667 |
| 0.1666666667 |
| 0.5          |
| 0.1379790553 |
| 1            |
| 0.25         |
| 1            |
| 0.5          |
| 0.5          |
| 0.4166666667 |

|              |
|--------------|
| 1            |
| 1            |
| 0.5          |
| 1            |
| 0.416666667  |
| 1            |
| 1            |
| 1            |
| 1            |
| 1            |
| 1            |
| 0.376114082  |
| 1            |
| 1            |
| 1            |
| 1            |
| 1            |
| 1            |
| 1            |
| 1            |
| 1            |
| 1            |
| 1            |
| 1            |
| 0.5588235294 |
| 0.5588235294 |
| 0.166666667  |
| 1            |
| 0.416666667  |
| 1            |
| 1            |
| 1            |
| 1            |
| 0.5          |
| 1            |
| 1            |
| 1            |
| 1            |
| 1            |
| 0.416666667  |
| 1            |
| 1            |
| 0.376114082  |
| 0.376114082  |
| 1            |
| 0.5588235294 |
| 0.5588235294 |
| 0.5588235294 |
| 0.5588235294 |
| 0.5          |
| 0.6295677362 |
| 0.5588235294 |
| 1            |

|              |
|--------------|
| 0.166666667  |
| 0.166666667  |
| 0.166666667  |
| 1            |
| 0.166666667  |
| 0.5588235294 |
| 0.5588235294 |
| 1            |
| 0.416666667  |
| 0.166666667  |
| 0.4178238744 |
| 0.5588235294 |
| 0.416666667  |
| 1            |
| 0.416666667  |
| 0.416666667  |
| 0.416666667  |
| 0.6256684492 |
| 1            |
| 0.25         |
| 0.25         |
| 1            |
| 0.6256684492 |
| 0.376114082  |
| 1            |
| 0.416666667  |
| 0.416666667  |
| 0.6256684492 |
| 0.6256684492 |
| 1            |
| 1            |
| 1            |
| 0.25         |
| 1            |
| 0.6773654476 |
| 0.25         |
| 1            |
| 1            |
| 1            |
| 1            |
| 0.25         |
| 1            |
| 0.166666667  |
| 1            |
| 0.416666667  |
| 1            |
| 1            |
| 0.25         |
| 0.416666667  |
| 0.2869875223 |
| 0.416666667  |

|              |
|--------------|
| 1            |
| 0.166666667  |
| 1            |
| 1            |
| 0.166666667  |
| 1            |
| 0.1379790553 |
| 0.5          |
| 1            |
| 1            |
| 1            |
| 1            |
| 0.166666667  |
| 1            |
| 1            |
| 0.416666667  |
| 1            |
| 1            |
| 0.166666667  |
| 0.5          |
| 0.5588235294 |
| 0.6256684492 |
| 1            |
| 0.5588235294 |
| 0.6773654476 |
| 1            |
| 0.25         |
| 1            |
| 1            |
| 0.2869875223 |
| 1            |
| 0.2869875223 |
| 0.2869875223 |
| 0.6773654476 |
| 1            |
| 0.6256684492 |
| 1            |
| 0.5          |
| 1            |
| 0.5588235294 |
| 1            |
| 1            |
| 0.6256684492 |
| 1            |
| 1            |
| 0.25         |
| 0.25         |
| 1            |
| 1            |
| 0.25         |
| 0.6256684492 |



|              |
|--------------|
| 0.6773654476 |
| 0.6773654476 |
| 1            |
| 0.4166666667 |
| 0.6256684492 |
| 0.4166666667 |
| 1            |
| 1            |
| 0.6773654476 |
| 1            |
| 0.25         |
| 0.25         |
| 0.25         |
| 0.25         |
| 0.25         |
| 0.25         |
| 1            |
| 0.6773654476 |
| 1            |
| 0.4166666667 |
| 0.4166666667 |
| 0.4166666667 |
| 1            |
| 0.4178238744 |
| 1            |
| 1            |
| 1            |
| 1            |
| 0.5588235294 |
| 1            |
| 1            |
| 1            |
| 1            |
| 1            |
| 0.376114082  |
| 1            |
| 1            |
| 0.4166666667 |
| 1            |
| 0.4166666667 |
| 0.6256684492 |
| 0.6256684492 |
| 1            |
| 1            |
| 1            |
| 1            |
| 0.4166666667 |
| 0.4166666667 |
| 0.6256684492 |
| 1            |
| 1            |

|              |
|--------------|
| 0.1379790553 |
| 0.1379790553 |
| 0.1379790553 |
| 0.1379790553 |
| 0.5588235294 |
| 1            |
| 1            |
| 1            |
| 1            |
| 0.5588235294 |
| 0.5588235294 |
| 1            |
| 0.2869875223 |
| 1            |
| 0.1666666667 |
| 0.4166666667 |
| 0.4166666667 |
| 0.6256684492 |
| 1            |
| 0.6256684492 |
| 0.4166666667 |
| 1            |
| 1            |
| 0.25         |
| 1            |
| 0.25         |
| 0.209972112  |
| 0.1666666667 |
| 0.5          |
| 1            |
| 0.4166666667 |
| 1            |
| 0.4166666667 |
| 1            |
| 1            |
| 1            |
| 0.5588235294 |
| 0.4166666667 |
| 0.5588235294 |
| 0.4166666667 |
| 0.4166666667 |
| 1            |
| 0.6256684492 |
| 0.1247771836 |
| 1            |
| 0.6256684492 |
| 1            |
| 1            |
| 0.5          |
| 0.2869875223 |
| 0.1666666667 |

|              |
|--------------|
| 1            |
| 1            |
| 0.416666667  |
| 0.416666667  |
| 0.416666667  |
| 0.416666667  |
| 0.416666667  |
| 0.416666667  |
| 0.416666667  |
| 1            |
| 0.6295677362 |
| 0.5          |
| 0.1379790553 |
| 1            |
| 1            |
| 1            |
| 1            |
| 0.166666667  |
| 1            |
| 0.416666667  |
| 0.376114082  |
| 0.1379790553 |
| 0.25         |
| 1            |
| 1            |
| 0.5588235294 |
| 0.25         |
| 0.416666667  |
| 1            |
| 1            |
| 1            |
| 1            |
| 0.5          |
| 0.6256684492 |
| 1            |
| 1            |
| 1            |
| 1            |
| 0.5588235294 |
| 1            |
| 0.25         |
| 0.416666667  |
| 1            |
| 1            |
| 0.6256684492 |
| 0.166666667  |
| 0.166666667  |
| 1            |
| 1            |
| 1            |
| 0.5          |

|              |
|--------------|
| 1            |
| 1            |
| 0.5          |
| 1            |
| 1            |
| 0.6773654476 |
| 1            |
| 0.25         |
| 0.6256684492 |
| 0.6256684492 |
| 1            |
| 1            |
| 1            |
| 1            |
| 1            |
| 0.5588235294 |
| 1            |
| 0.25         |
| 1            |
| 1            |
| 0.5          |
| 1            |
| 0.6773654476 |
| 1            |
| 0.6256684492 |
| 1            |
| 0.4166666667 |
| 0.4166666667 |
| 1            |
| 0.1666666667 |
| 0.6256684492 |
| 0.4166666667 |
| 0.4166666667 |
| 1            |
| 1            |
| 1            |
| 1            |
| 1            |
| 1            |
| 1            |
| 0.4166666667 |
| 1            |
| 1            |
| 1            |
| 1            |
| 0.6256684492 |
| 1            |
| 0.376114082  |
| 0.4166666667 |
| 1            |
| 0.1666666667 |

|              |
|--------------|
| 0.5588235294 |
| 0.5588235294 |
| 1            |
| 1            |
| 1            |
| 0.376114082  |
| 1            |
| 0.4166666667 |
| 1            |
| 1            |
| 1            |
| 0.5588235294 |
| 0.5588235294 |
| 0.4166666667 |
| 1            |
| 1            |
| 0.4166666667 |
| 0.6256684492 |
| 0.4166666667 |
| 1            |
| 0.1666666667 |
| 1            |
| 0.1666666667 |
| 0.4166666667 |
| 1            |
| 1            |
| 1            |
| 0.376114082  |
| 1            |
| 1            |
| 1            |
| 1            |
| 1            |
| 1            |
| 0.209972112  |
| 1            |
| 1            |
| 0.25         |
| 0.5          |
| 1            |
| 0.6256684492 |
| 1            |
| 0.4166666667 |
| 1            |
| 1            |
| 0.5          |
| 1            |
| 1            |
| 1            |
| 0.1379790553 |
| 1            |

|              |
|--------------|
| 0.416666667  |
| 0.2869875223 |
| 0.25         |
| 0.25         |
| 0.6256684492 |
| 1            |
| 1            |
| 1            |
| 1            |
| 0.1379790553 |
| 0.25         |
| 0.5          |
| 1            |
| 1            |
| 1            |
| 1            |
| 1            |
| 0.6256684492 |
| 1            |
| 1            |
| 1            |
| 0.416666667  |
| 1            |
| 0.2869875223 |
| 0.5588235294 |
| 0.5588235294 |
| 0.5588235294 |
| 0.0637254902 |
| 0.416666667  |
| 0.5          |
| 0.5          |
| 1            |
| 1            |
| 0.166666667  |
| 0.1379790553 |
| 1            |
| 1            |
| 1            |
| 1            |
| 0.5588235294 |
| 1            |
| 0.166666667  |
| 0.2869875223 |
| 0.25         |
| 1            |
| 1            |
| 1            |
| 0.25         |
| 0.376114082  |
| 1            |
| 1            |

|              |
|--------------|
| 1            |
| 0.416666667  |
| 0.416666667  |
| 1            |
| 1            |
| 1            |
| 1            |
| 0.5          |
| 1            |
| 0.25         |
| 0.5588235294 |
| 0.5588235294 |
| 0.416666667  |
| 0.2869875223 |
| 0.2869875223 |
| 0.166666667  |
| 0.166666667  |
| 0.416666667  |
| 0.416666667  |
| 1            |
| 0.416666667  |
| 1            |
| 0.166666667  |
| 1            |
| 1            |
| 1            |
| 1            |
| 1            |
| 1            |
| 1            |
| 1            |
| 0.416666667  |
| 1            |
| 0.5          |
| 1            |
| 0.6773654476 |
| 0.5588235294 |
| 0.416666667  |
| 0.0637254902 |
| 0.166666667  |
| 1            |
| 0.0637254902 |
| 1            |
| 0.5          |
| 0.416666667  |
| 0.25         |
| 1            |
| 0.166666667  |
| 1            |
| 0.166666667  |
| 0.166666667  |

|              |
|--------------|
| 0.6773654476 |
| 0.6773654476 |
| 0.5          |
| 1            |
| 1            |
| 0.2869875223 |
| 1            |
| 1            |
| 1            |
| 1            |
| 0.4166666667 |
| 0.4166666667 |
| 1            |
| 1            |
| 0.0637254902 |
| 0.4178238744 |
| 0.5          |
| 0.6256684492 |
| 0.6256684492 |
| 1            |
| 0.5588235294 |
| 0.5          |
| 0.5          |
| 0.25         |
| 1            |
| 1            |
| 0.1247771836 |
| 0.5          |
| 0.1666666667 |
| 1            |
| 0.6256684492 |
| 0.5588235294 |
| 1            |
| 1            |
| 0.2869875223 |
| 1            |
| 0.5          |
| 1            |
| 1            |
| 1            |
| 0.4166666667 |
| 1            |
| 0.5588235294 |
| 1            |
| 1            |
| 1            |
| 1            |
| 0.1379790553 |
| 0.4166666667 |
| 0.1379790553 |
| 0.25         |



|              |
|--------------|
| 0.5          |
| 0.5588235294 |
| 0.5588235294 |
| 1            |
| 0.1666666667 |
| 1            |
| 1            |
| 1            |
| 1            |
| 1            |
| 1            |
| 0.4166666667 |
| 1            |
| 1            |
| 0.4166666667 |
| 0.5          |
| 1            |
| 1            |
| 1            |
| 1            |
| 1            |
| 1            |
| 1            |
| 1            |
| 0.1666666667 |
| 0.5          |
| 0.5          |
| 1            |
| 1            |
| 1            |
| 0.5          |
| 0.5588235294 |
| 1            |
| 1            |
| 0.4166666667 |
| 0.2869875223 |
| 1            |
| 0.2869875223 |
| 1            |
| 0.6256684492 |
| 1            |
| 0.25         |
| 0.6256684492 |
| 1            |
| 1            |
| 0.6256684492 |
| 1            |
| 1            |
| 1            |
| 0.5          |
| 1            |
| 1            |
| 1            |

|              |
|--------------|
| 1            |
| 1            |
| 1            |
| 0.376114082  |
| 0.5588235294 |
| 1            |
| 1            |
| 1            |
| 1            |
| 0.6773654476 |
| 0.6256684492 |
| 1            |
| 1            |
| 0.4166666667 |
| 0.4166666667 |
| 0.2869875223 |
| 1            |
| 1            |
| 1            |
| 1            |
| 0.4166666667 |
| 0.4166666667 |
| 0.4166666667 |
| 0.1666666667 |
| 0.5588235294 |
| 1            |
| 0.1379790553 |
| 0.1666666667 |
| 0.376114082  |
| 1            |
| 0.6256684492 |
| 1            |
| 1            |
| 1            |
| 1            |
| 1            |
| 1            |
| 1            |
| 1            |
| 1            |
| 0.4166666667 |
| 1            |
| 1            |
| 0.25         |
| 1            |
| 0.6295677362 |
| 0.6295677362 |
| 1            |
| 0.25         |
| 0.4166666667 |
| 0.6256684492 |

|              |
|--------------|
| 0.166666667  |
| 1            |
| 0.5588235294 |
| 1            |
| 1            |
| 1            |
| 1            |
| 1            |
| 1            |
| 0.376114082  |
| 0.376114082  |
| 0.5          |
| 0.416666667  |
| 1            |
| 1            |
| 1            |
| 1            |
| 0.416666667  |
| 0.5588235294 |
| 1            |
| 1            |
| 0.25         |
| 0.416666667  |
| 0.5          |
| 0.5588235294 |
| 0.5588235294 |
| 0.5588235294 |
| 0.6773654476 |
| 1            |
| 1            |
| 0.6256684492 |
| 0.6256684492 |
| 0.5588235294 |
| 0.6256684492 |
| 1            |
| 1            |
| 1            |
| 0.416666667  |
| 0.25         |
| 1            |
| 0.25         |
| 0.4178238744 |
| 0.4178238744 |
| 1            |
| 0.5          |
| 0.0637254902 |
| 0.416666667  |
| 0.25         |
| 1            |
| 1            |
| 0.416666667  |

|              |
|--------------|
| 1            |
| 0.376114082  |
| 0.376114082  |
| 0.416666667  |
| 0.416666667  |
| 0.416666667  |
| 0.416666667  |
| 0.416666667  |
| 0.416666667  |
| 0.416666667  |
| 0.416666667  |
| 0.416666667  |
| 0.416666667  |
| 0.416666667  |
| 1            |
| 1            |
| 1            |
| 1            |
| 1            |
| 1            |
| 1            |
| 1            |
| 1            |
| 1            |
| 1            |
| 1            |
| 1            |
| 1            |
| 0.416666667  |
| 0.25         |
| 1            |
| 1            |
| 1            |
| 1            |
| 1            |
| 1            |
| 1            |
| 1            |
| 1            |
| 1            |
| 0.2869875223 |
| 1            |
| 0.5588235294 |
| 0.5588235294 |
| 1            |
| 1            |
| 0.166666667  |
| 1            |
| 1            |
| 1            |
| 1            |
| 1            |
| 0.416666667  |
| 1            |

|              |
|--------------|
| 0.5          |
| 0.5          |
| 0.416666667  |
| 0.416666667  |
| 0.5588235294 |
| 0.416666667  |
| 0.2869875223 |
| 0.416666667  |
| 1            |
| 0.209972112  |
| 1            |
| 1            |
| 0.5588235294 |
| 1            |
| 1            |
| 1            |
| 1            |
| 1            |
| 0.166666667  |
| 1            |
| 1            |
| 1            |
| 0.1379790553 |
| 0.416666667  |
| 1            |
| 1            |
| 0.5588235294 |
| 1            |
| 1            |
| 0.5          |
| 1            |
| 0.2869875223 |
| 1            |
| 0.5588235294 |
| 1            |
| 0.5          |
| 0.5588235294 |
| 0.5588235294 |
| 0.25         |
| 0.2869875223 |
| 0.2869875223 |
| 0.2869875223 |
| 1            |
| 1            |
| 1            |
| 0.3666803232 |
| 1            |
| 1            |
| 0.25         |
| 1            |
| 1            |

|              |
|--------------|
| 1            |
| 0.1247771836 |
| 1            |
| 1            |
| 1            |
| 1            |
| 0.376114082  |
| 0.5          |
| 0.5          |
| 0.5588235294 |
| 0.209972112  |
| 1            |
| 0.209972112  |
| 0.209972112  |
| 1            |
| 0.209972112  |
| 1            |
| 0.5          |
| 1            |
| 0.25         |
| 1            |
| 1            |
| 0.5588235294 |
| 0.6256684492 |
| 1            |
| 1            |
| 0.416666667  |
| 0.416666667  |
| 1            |
| 0.25         |
| 1            |
| 0.5588235294 |
| 1            |
| 1            |
| 1            |
| 1            |
| 0.416666667  |
| 0.416666667  |
| 0.416666667  |
| 0.25         |
| 0.416666667  |
| 0.2869875223 |
| 1            |
| 1            |
| 0.3666803232 |
| 0.3666803232 |
| 0.5588235294 |
| 1            |
| 0.5588235294 |
| 0.6256684492 |
| 0.416666667  |

|              |
|--------------|
| 0.376114082  |
| 0.166666667  |
| 1            |
| 0.5          |
| 0.6256684492 |
| 0.416666667  |
| 0.1247771836 |
| 1            |
| 0.416666667  |
| 1            |
| 1            |
| 1            |
| 0.25         |
| 1            |
| 0.6256684492 |
| 1            |
| 0.416666667  |
| 1            |
| 1            |
| 1            |
| 0.416666667  |
| 1            |
| 1            |
| 0.5588235294 |
| 0.416666667  |
| 0.416666667  |
| 0.6256684492 |
| 0.416666667  |
| 0.416666667  |
| 1            |
| 0.4178238744 |
| 1            |
| 0.5          |
| 1            |
| 1            |
| 0.5          |
| 0.6256684492 |
| 1            |
| 1            |
| 1            |
| 0.061942959  |
| 0.416666667  |
| 1            |
| 1            |
| 1            |
| 0.376114082  |
| 1            |
| 0.6773654476 |
| 1            |
| 1            |
| 0.376114082  |

|              |
|--------------|
| 0.6295677362 |
| 1            |
| 1            |
| 0.4166666667 |
| 0.1247771836 |
| 1            |
| 0.6256684492 |
| 0.5          |
| 1            |
| 1            |
| 0.5          |
| 0.4166666667 |
| 1            |
| 1            |
| 1            |
| 1            |
| 1            |
| 0.6256684492 |
| 1            |
| 0.4166666667 |
| 1            |
| 0.5588235294 |
| 1            |
| 1            |
| 0.6256684492 |
| 0.1666666667 |
| 0.25         |
| 0.6256684492 |
| 1            |
| 1            |
| 1            |
| 0.25         |
| 0.7287727104 |
| 1            |
| 0.4166666667 |
| 0.4166666667 |
| 1            |
| 1            |
| 0.5588235294 |
| 0.376114082  |
| 1            |
| 0.376114082  |
| 0.2869875223 |
| 0.2869875223 |
| 0.1666666667 |
| 0.5588235294 |
| 1            |
| 1            |
| 1            |
| 1            |
| 1            |



|              |
|--------------|
| 0.5588235294 |
| 1            |
| 0.1379790553 |
| 0.376114082  |
| 0.6256684492 |
| 1            |
| 0.5588235294 |
| 0.1666666667 |
| 0.4166666667 |
| 0.376114082  |
| 0.6256684492 |
| 0.5          |
| 0.5          |
| 1            |
| 1            |
| 1            |
| 0.4166666667 |
| 0.5          |
| 0.4166666667 |
| 1            |
| 0.2950732295 |
| 0.2950732295 |
| 0.2869875223 |
| 0.6773654476 |
| 1            |
| 0.376114082  |
| 1            |
| 1            |
| 0.6256684492 |
| 1            |
| 1            |
| 1            |
| 1            |
| 1            |
| 0.1666666667 |
| 0.376114082  |
| 1            |
| 0.4166666667 |
| 0.5588235294 |
| 0.6256684492 |
| 1            |
| 0.209972112  |
| 0.4166666667 |
| 0.4166666667 |
| 0.1379790553 |
| 0.5588235294 |
| 0.6773654476 |
| 1            |
| 1            |
| 0.6256684492 |
| 1            |

|              |
|--------------|
| 1            |
| 1            |
| 1            |
| 0.5588235294 |
| 0.4166666667 |
| 1            |
| 1            |
| 0.2869875223 |
| 0.5588235294 |
| 1            |
| 1            |
| 0.6256684492 |
| 1            |
| 1            |
| 1            |
| 0.1379790553 |
| 1            |
| 0.4166666667 |
| 0.5588235294 |
| 0.5          |
| 0.6256684492 |
| 1            |
| 0.1666666667 |
| 0.4166666667 |
| 0.4166666667 |
| 0.4166666667 |
| 1            |
| 1            |
| 0.4166666667 |
| 0.061942959  |
| 0.061942959  |
| 1            |
| 0.4166666667 |
| 1            |
| 0.376114082  |
| 0.1379790553 |
| 0.6256684492 |
| 1            |
| 1            |
| 0.4166666667 |
| 1            |
| 0.4166666667 |
| 1            |
| 0.5588235294 |
| 1            |
| 0.2869875223 |
| 1            |
| 0.4166666667 |
| 1            |
| 1            |
| 1            |

|              |
|--------------|
| 0.6256684492 |
| 1            |
| 0.6256684492 |
| 0.4166666667 |
| 1            |
| 1            |
| 1            |
| 0.5          |
| 0.6256684492 |
| 1            |
| 1            |
| 1            |
| 0.25         |
| 0.5588235294 |
| 0.5          |
| 1            |
| 1            |
| 1            |
| 0.0637254902 |
| 1            |
| 1            |
| 0.1666666667 |
| 1            |
| 1            |
| 1            |
| 1            |
| 1            |
| 1            |
| 0.5          |
| 0.1379790553 |
| 1            |
| 0.4166666667 |
| 1            |
| 0.2869875223 |
| 0.4166666667 |
| 0.5588235294 |
| 1            |
| 1            |
| 0.5588235294 |
| 0.5588235294 |
| 1            |
| 0.6773654476 |
| 0.6773654476 |
| 0.6773654476 |
| 0.6773654476 |
| 0.6773654476 |
| 0.6773654476 |
| 0.25         |
| 0.6773654476 |
| 0.6773654476 |
| 0.6773654476 |

|              |
|--------------|
| 0.6773654476 |
| 0.6773654476 |
| 0.1379790553 |
| 0.5          |
| 1            |
| 0.5          |
| 1            |
| 1            |
| 0.1666666667 |
| 0.5          |
| 0.2869875223 |
| 1            |
| 0.2869875223 |
| 1            |
| 0.5588235294 |
| 1            |
| 1            |
| 1            |
| 0.4166666667 |
| 1            |
| 1            |
| 1            |
| 1            |
| 0.25         |
| 0.25         |
| 0.5588235294 |
| 1            |
| 0.5588235294 |
| 0.4166666667 |
| 1            |
| 0.1666666667 |
| 1            |
| 0.25         |
| 0.25         |
| 0.25         |
| 0.4166666667 |
| 0.4166666667 |
| 0.5588235294 |
| 0.5588235294 |
| 0.5588235294 |
| 1            |
| 0.4166666667 |
| 0.4166666667 |
| 1            |
| 1            |
| 1            |
| 0.4166666667 |
| 0.4166666667 |
| 0.4166666667 |
| 0.4166666667 |
| 0.5          |

|              |
|--------------|
| 1            |
| 0.6256684492 |
| 1            |
| 1            |
| 0.6256684492 |
| 0.4166666667 |
| 0.5588235294 |
| 0.25         |
| 0.25         |
| 0.4166666667 |
| 1            |
| 0.4166666667 |
| 0.4166666667 |
| 1            |
| 1            |
| 1            |
| 1            |
| 1            |
| 0.5588235294 |
| 1            |
| 1            |
| 1            |
| 0.5588235294 |
| 1            |
| 1            |
| 0.6256684492 |
| 0.1666666667 |
| 1            |
| 1            |
| 1            |
| 1            |
| 1            |
| 0.6256684492 |
| 0.25         |
| 1            |
| 1            |
| 1            |
| 0.4166666667 |
| 0.1666666667 |
| 0.3666803232 |
| 0.376114082  |
| 0.6256684492 |
| 1            |
| 1            |
| 1            |
| 1            |
| 0.5          |
| 0.1379790553 |
| 0.5588235294 |
| 0.5588235294 |
| 1            |

|              |
|--------------|
| 0.5588235294 |
| 1            |
| 0.4166666667 |
| 0.5588235294 |
| 1            |
| 1            |
| 0.376114082  |
| 0.376114082  |
| 1            |
| 0.5          |
| 1            |
| 1            |
| 1            |
| 1            |
| 0.25         |
| 1            |
| 1            |
| 1            |
| 0.2869875223 |
| 1            |
| 0.25         |
| 1            |
| 0.25         |
| 1            |
| 0.4166666667 |
| 1            |
| 1            |
| 1            |
| 0.4178238744 |
| 0.5588235294 |
| 0.6773654476 |
| 0.6773654476 |
| 0.6773654476 |
| 0.1666666667 |
| 1            |
| 1            |
| 0.5588235294 |
| 0.4166666667 |
| 1            |
| 1            |
| 0.4166666667 |
| 1            |
| 0.5          |
| 1            |
| 0.4166666667 |
| 0.5588235294 |
| 1            |
| 0.6256684492 |
| 1            |
| 1            |
| 1            |

|              |
|--------------|
| 0.166666667  |
| 0.061942959  |
| 1            |
| 1            |
| 0.4178238744 |
| 0.5          |
| 1            |
| 1            |
| 1            |
| 1            |
| 0.5          |
| 0.5588235294 |
| 0.6256684492 |
| 1            |
| 1            |
| 1            |
| 1            |
| 1            |
| 0.5588235294 |
| 1            |
| 1            |
| 0.5          |
| 1            |
| 1            |
| 1            |
| 0.25         |
| 0.376114082  |
| 0.6256684492 |
| 0.416666667  |
| 0.5588235294 |
| 0.25         |
| 1            |
| 0.6256684492 |
| 0.4178238744 |
| 0.4178238744 |
| 1            |
| 0.416666667  |
| 1            |
| 1            |
| 1            |
| 1            |
| 1            |
| 0.5588235294 |
| 0.5588235294 |
| 0.5588235294 |
| 1            |
| 1            |
| 1            |
| 0.061942959  |
| 0.6256684492 |
| 1            |

|              |
|--------------|
| 1            |
| 0.416666667  |
| 0.25         |
| 0.25         |
| 0.5588235294 |
| 1            |
| 0.416666667  |
| 1            |
| 0.166666667  |
| 0.416666667  |
| 1            |
| 1            |
| 1            |
| 1            |
| 1            |
| 0.5588235294 |
| 0.5          |
| 0.416666667  |
| 0.6256684492 |
| 0.376114082  |
| 1            |
| 0.5588235294 |
| 1            |
| 0.5588235294 |
| 1            |
| 1            |
| 0.416666667  |
| 0.6256684492 |
| 0.416666667  |
| 0.416666667  |
| 1            |
| 0.25         |
| 0.5588235294 |
| 0.5588235294 |
| 0.6256684492 |
| 1            |
| 0.6256684492 |
| 1            |
| 0.2869875223 |
| 0.6256684492 |
| 1            |
| 1            |
| 0.416666667  |
| 0.209972112  |
| 0.209972112  |
| 0.416666667  |
| 0.416666667  |
| 1            |
| 1            |
| 0.2869875223 |
| 1            |



|              |
|--------------|
| 0.6256684492 |
| 0.4166666667 |
| 1            |
| 0.6295677362 |
| 0.1379790553 |
| 0.1379790553 |
| 0.5588235294 |
| 0.4166666667 |
| 1            |
| 1            |
| 1            |
| 1            |
| 1            |
| 1            |
| 0.6256684492 |
| 0.1666666667 |
| 1            |
| 1            |
| 0.1666666667 |
| 0.4166666667 |
| 1            |
| 0.4166666667 |
| 1            |
| 1            |
| 1            |
| 1            |
| 1            |
| 0.6256684492 |
| 0.25         |
| 1            |
| 1            |
| 1            |
| 1            |
| 0.5          |
| 1            |
| 0.25         |
| 1            |
| 1            |
| 1            |
| 0.5588235294 |
| 0.4178238744 |
| 0.4166666667 |
| 1            |
| 1            |
| 1            |
| 0.6773654476 |
| 1            |
| 1            |
| 0.6256684492 |
| 0.6256684492 |
| 0.6256684492 |

|              |
|--------------|
| 0.6256684492 |
| 1            |
| 1            |
| 1            |
| 1            |
| 0.376114082  |
| 1            |
| 0.5588235294 |
| 0.6256684492 |
| 0.6256684492 |
| 0.1379790553 |
| 1            |
| 1            |
| 1            |
| 1            |
| 1            |
| 1            |
| 1            |
| 0.5          |
| 0.5588235294 |
| 1            |
| 0.1666666667 |
| 0.5          |
| 0.6773654476 |
| 1            |
| 0.5          |
| 1            |
| 1            |
| 1            |
| 1            |
| 0.5588235294 |
| 0.2869875223 |
| 1            |
| 0.25         |
| 1            |
| 0.6256684492 |
| 0.376114082  |
| 0.6256684492 |
| 0.6256684492 |
| 1            |
| 1            |
| 1            |
| 1            |
| 1            |
| 1            |
| 0.4166666667 |
| 1            |
| 1            |
| 1            |
| 0.6256684492 |
| 1            |

|              |
|--------------|
| 0.209972112  |
| 1            |
| 1            |
| 0.6256684492 |
| 0.5588235294 |
| 0.6256684492 |
| 1            |
| 1            |
| 1            |
| 1            |
| 1            |
| 1            |
| 0.1666666667 |
| 1            |
| 0.5588235294 |
| 0.5588235294 |
| 0.5588235294 |
| 1            |
| 0.5          |
| 0.6256684492 |
| 1            |
| 0.5588235294 |
| 0.5588235294 |
| 1            |
| 1            |
| 1            |
| 0.6256684492 |
| 1            |
| 1            |
| 1            |
| 1            |
| 1            |
| 1            |
| 1            |
| 1            |
| 1            |
| 1            |
| 0.1666666667 |
| 1            |
| 1            |
| 1            |
| 1            |
| 1            |
| 0.6256684492 |
| 0.5          |
| 1            |
| 1            |
| 0.209972112  |
| 0.209972112  |
| 0.209972112  |
| 0.209972112  |

|              |
|--------------|
| 0.6256684492 |
| 0.5          |
| 0.6256684492 |
| 0.5          |
| 1            |
| 1            |
| 0.5588235294 |
| 0.6256684492 |
| 0.6256684492 |
| 1            |
| 1            |
| 0.5          |
| 0.5588235294 |
| 0.6256684492 |
| 0.5          |
| 1            |
| 1            |
| 1            |
| 1            |
| 1            |
| 0.25         |
| 1            |
| 1            |
| 1            |
| 1            |
| 1            |
| 0.5588235294 |
| 1            |
| 0.5588235294 |
| 1            |
| 1            |
| 1            |
| 1            |
| 1            |
| 0.6256684492 |
| 0.2869875223 |
| 0.6256684492 |
| 1            |
| 1            |
| 0.6256684492 |
| 0.6256684492 |
| 0.6256684492 |
| 0.6256684492 |
| 1            |
| 1            |
| 0.6256684492 |
| 0.6256684492 |
| 1            |
| 0.6256684492 |
| 0.4166666667 |
| 1            |

|              |
|--------------|
| 1            |
| 0.6773654476 |
| 0.6773654476 |
| 0.376114082  |
| 0.376114082  |
| 1            |
| 0.6256684492 |
| 1            |
| 0.209972112  |
| 1            |
| 1            |
| 0.376114082  |
| 1            |
| 1            |
| 1            |
| 1            |
| 1            |
| 1            |
| 1            |
| 1            |
| 0.6256684492 |
| 1            |
| 0.2869875223 |
| 0.4166666667 |
| 1            |
| 1            |
| 0.6256684492 |
| 1            |
| 1            |
| 0.5588235294 |
| 1            |
| 0.4166666667 |
| 0.5          |
| 1            |
| 1            |
| 1            |
| 1            |
| 0.5588235294 |
| 0.5          |
| 0.5          |
| 1            |
| 1            |
| 0.5          |
| 0.4166666667 |
| 0.5          |
| 0.6256684492 |
| 1            |
| 0.6256684492 |
| 0.6256684492 |
| 0.6256684492 |
| 0.6256684492 |

|              |
|--------------|
| 1            |
| 1            |
| 1            |
| 1            |
| 1            |
| 1            |
| 0.5          |
| 0.5          |
| 0.5          |
| 0.5          |
| 1            |
| 1            |
| 1            |
| 0.5588235294 |
| 0.5588235294 |
| 0.209972112  |
| 1            |
| 1            |
| 1            |
| 1            |
| 1            |
| 1            |
| 0.6256684492 |
| 0.6256684492 |
| 1            |
| 1            |
| 1            |
| 1            |
| 0.6256684492 |
| 0.6256684492 |
| 1            |
| 1            |
| 1            |
| 1            |
| 0.25         |
| 0.6256684492 |
| 0.6256684492 |
| 1            |
| 1            |
| 0.6773654476 |
| 1            |
| 1            |
| 1            |
| 1            |
| 0.6256684492 |
| 0.25         |
| 0.6256684492 |
| 0.6256684492 |
| 1            |
| 1            |
| 0.5          |

|              |
|--------------|
| 0.5          |
| 0.25         |
| 0.6256684492 |
| 1            |
| 0.376114082  |
| 0.376114082  |
| 0.6256684492 |
| 1            |
| 1            |
| 1            |
| 0.1247771836 |
| 0.4178238744 |
| 0.1666666667 |
| 1            |
| 0.209972112  |
| 0.25         |
| 1            |
| 1            |
| 1            |
| 1            |
| 1            |
| 1            |
| 1            |
| 1            |
| 1            |
| 1            |
| 1            |
| 0.6256684492 |
| 0.5          |
| 1            |
| 1            |
| 1            |
| 1            |
| 0.6256684492 |
| 0.6256684492 |
| 0.6256684492 |
| 1            |
| 0.6256684492 |
| 0.6256684492 |
| 0.6256684492 |
| 0.6256684492 |
| 0.6256684492 |
| 0.6256684492 |
| 0.6256684492 |
| 1            |
| 1            |
| 1            |
| 0.6256684492 |
| 0.6256684492 |
| 0.6256684492 |
| 0.6256684492 |
| 1            |





|              |
|--------------|
| 1            |
| 1            |
| 1            |
| 1            |
| 1            |
| 1            |
| 1            |
| 1            |
| 1            |
| 1            |
| 0.2869875223 |
| 1            |
| 1            |
| 1            |
| 0.5          |
| 1            |
| 1            |
| 1            |
| 0.4166666667 |
| 0.376114082  |
| 1            |
| 1            |
| 1            |
| 0.25         |
| 1            |
| 1            |
| 0.25         |
| 1            |
| 1            |
| 1            |
| 0.5588235294 |
| 0.5588235294 |
| 0.5          |
| 1            |
| 0.6773654476 |
| 1            |
| 1            |
| 1            |
| 0.6256684492 |
| 0.6256684492 |
| 1            |
| 0.25         |
| 0.25         |
| 0.6256684492 |
| 0.6256684492 |
| 0.25         |
| 0.5          |
| 0.5          |
| 1            |
| 0.25         |
| 1            |
| 1            |

|              |
|--------------|
| 0.5          |
| 0.25         |
| 0.5588235294 |
| 1            |
| 0.376114082  |
| 0.376114082  |
| 1            |
| 1            |
| 1            |
| 1            |
| 0.25         |
| 0.6256684492 |
| 1            |
| 0.6256684492 |
| 0.209972112  |
| 1            |
| 1            |
| 1            |
| 0.5588235294 |
| 1            |
| 0.5588235294 |
| 0.209972112  |
| 1            |
| 0.209972112  |
| 1            |
| 0.2869875223 |
| 0.5          |
| 1            |
| 0.6256684492 |
| 1            |
| 1            |
| 0.7287727104 |
| 0.5          |
| 0.6773654476 |
| 1            |
| 1            |
| 1            |
| 1            |
| 1            |
| 0.5          |
| 0.5          |
| 0.5          |
| 1            |
| 0.5          |
| 0.5          |
| 0.5          |
| 1            |
| 1            |
| 1            |
| 1            |
| 0.5          |

|              |
|--------------|
| 0.5          |
| 1            |
| 1            |
| 1            |
| 1            |
| 0.6256684492 |
| 0.5588235294 |
| 1            |
| 1            |
| 1            |
| 1            |
| 1            |
| 1            |
| 1            |
| 1            |
| 1            |
| 1            |
| 1            |
| 0.6256684492 |
| 0.6256684492 |
| 1            |
| 1            |
| 0.6256684492 |
| 1            |
| 0.5          |
| 1            |
| 1            |
| 1            |
| 1            |
| 1            |
| 1            |
| 1            |
| 1            |
| 1            |
| 1            |
| 0.6256684492 |
| 1            |
| 1            |
| 1            |
| 1            |
| 1            |
| 1            |
| 1            |
| 1            |
| 1            |
| 1            |
| 0.6256684492 |
| 0.6256684492 |
| 1            |
| 1            |
| 0.4166666667 |
| 1            |
| 0.6256684492 |

|              |
|--------------|
| 0.416666667  |
| 1            |
| 1            |
| 1            |
| 1            |
| 0.6256684492 |
| 0.2869875223 |
| 1            |
| 1            |
| 1            |
| 1            |
| 1            |
| 0.25         |
| 0.416666667  |
| 1            |
| 1            |
| 0.6773654476 |
| 1            |
| 0.6256684492 |
| 1            |
| 0.6256684492 |
| 1            |
| 1            |
| 1            |
| 1            |
| 1            |
| 1            |
| 0.25         |
| 0.5          |
| 1            |
| 0.2869875223 |
| 0.5          |
| 1            |
| 1            |
| 1            |
| 1            |
| 1            |
| 1            |
| 1            |
| 1            |
| 1            |
| 1            |
| 0.2869875223 |
| 1            |
| 0.25         |
| 0.5          |
| 0.5588235294 |
| 0.6256684492 |
| 0.5          |
| 0.5          |
| 0.6295677362 |
| 1            |
